# Supplementary material for: Metal-free alkene carbooxygenation following tandem intramolecular alkoxylation/Claisen rearrangement: stereocontrolled access to bridged [4.2.1] lactones
Source: PubMed Central journal article supplement (PMC6429610; doi:10.1039/c9sc00079h), 2019-01-24

Supporting Information

**Metal-Free Alkene Carboxygenation Following Tandem Intramolecular  
Alkoxylation/Claisen Rearrangement:  
Stereospecific Access to Bridged [4.2.1] Lactones**

Long Li, Xin-Qi Zhu, Ying-Qi Zhang, Hao-Zhen Bu, Peng Yuan, Jinyu Chen, Jingyi Su,  
Xianming Deng and Long-Wu Ye\*

State Key Laboratory of Physical Chemistry of Solid Surfaces and Key Laboratory for  
Chemical Biology of Fujian Province, College of Chemistry and Chemical Engineering,  
Xiamen University, Xiamen 361005, China

E-mail: [longwuye@xmu.edu.cn](mailto:longwuye@xmu.edu.cn)

| <b>Content</b>                                              | <b>Page Number</b> |
|-------------------------------------------------------------|--------------------|
| <b>General</b>                                              | 2                  |
| <b>More Reaction Condition, Scope and Mechanism Studies</b> | 3                  |
| <b>Biological Tests</b>                                     | 6                  |
| <b>Preparation of Starting Materials</b>                    | 7                  |
| <b>General Procedure: Brønsted Acid Catalysis</b>           | 36                 |
| <b>Crystal Data</b>                                         | 64                 |
| <b>HPLC Chromatograms</b>                                   | 68                 |
| <b><sup>1</sup>H and <sup>13</sup>C NMR Spectra</b>         | 77                 |

**General Information.** Ethyl acetate (ACS grade), hexanes (ACS grade) and anhydrous 1,2-dichloroethane (ACS grade) were obtained commercially and used without further purification. Methylene chloride, tetrahydrofuran and diethyl ether were purified according to standard methods unless otherwise noted. Commercially available reagents were used without further purification. Ees are determined using HPLC on a chiral stationary phase. Reactions were monitored by thin layer chromatography (TLC) using silicycle pre-coated silica gel plates. Flash column chromatography was performed over silica gel (300-400 mesh). Infrared spectra were recorded on a Nicolet AVATER FTIR330 spectrometer as thin film and are reported in reciprocal centimeter ( $\text{cm}^{-1}$ ). Mass spectra were recorded with Micromass QTOF2 Quadrupole/Time-of-Flight Tandem mass spectrometer using electron spray ionization.

$^1\text{H}$  NMR spectra were recorded on a Bruker AV-400 spectrometer and a Bruker AV-500 spectrometer in chloroform- $\text{d}_3$ . Chemical shifts are reported in ppm with the internal TMS signal at 0.0 ppm as a standard. The data is being reported as (s = singlet, d = doublet, t = triplet, m = multiplet or unresolved, brs = broad singlet, coupling constant(s) in Hz, integration).

$^{13}\text{C}$  NMR spectra were recorded on a Bruker AV-400 spectrometer and a Bruker AV-500 spectrometer in chloroform- $\text{d}_3$ . Chemical shifts are reported in ppm with the internal chloroform signal at 77.0 ppm as a standard.

## More Reaction Condition, Scope and Mechanism Studies

### 1. Other reaction condition studies on the cascade cyclization of indolyl ynamide **1a**<sup>a</sup>

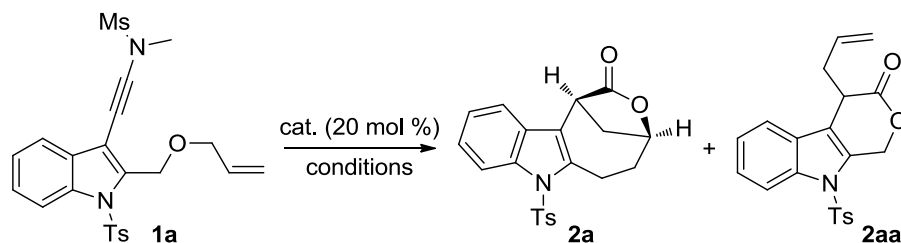

| Entry           | Catalyst                          | Reaction conditions             | Yield <sup>b</sup> (%) |            |           |
|-----------------|-----------------------------------|---------------------------------|------------------------|------------|-----------|
|                 |                                   |                                 | <b>2a</b>              | <b>2aa</b> | <b>1a</b> |
| 1               | AgOTf                             | DCE, 40 °C, 48 h                | <1                     | 30         | 50        |
| 2               | AgNTf <sub>2</sub>                | DCE, 40 °C, 48 h                | <1                     | <1         | >95       |
| 3               | CF <sub>3</sub> CO <sub>2</sub> H | DCE, 40 °C, 48 h                | <1                     | <1         | <1        |
| 4               | MsOH                              | DCE, 40 °C, 48 h                | <1                     | <1         | <1        |
| 5               | TsOH                              | DCE, 40 °C, 48 h                | <1                     | <1         | <1        |
| 6               | HNTf <sub>2</sub>                 | toluene, 40 °C, 48 h            | 28                     | 26         | <1        |
| 7               | HNTf <sub>2</sub>                 | PhCl, 40 °C, 48 h               | 69                     | <1         | <1        |
| 8               | HNTf <sub>2</sub>                 | THF, 40 °C, 48 h                | <1                     | <1         | <1        |
| 9               | HNTf <sub>2</sub>                 | CH <sub>3</sub> CN, 40 °C, 48 h | 44                     | 12         | <1        |
| 10 <sup>c</sup> | HNTf <sub>2</sub>                 | DCE, 40 °C, 24 h                | 80                     | <1         | <1        |
| 11 <sup>d</sup> | HNTf <sub>2</sub>                 | DCE, 40 °C, 24 h                | 74                     | <1         | <1        |

<sup>a</sup> Reaction conditions: **1a** (0.1 mmol), catalyst (20 mol %), solvent (2 mL), 40 °C, in vials. <sup>b</sup> Measured by <sup>1</sup>H NMR using diethyl phthalate as the internal standard. <sup>c</sup> The reaction was performed in a flame-dried vial with dry DCE as the solvent and 1 equiv of H<sub>2</sub>O as an additive. <sup>d</sup> The reaction was performed in a flame-dried vial with dry DCE as the solvent and 2 equiv of H<sub>2</sub>O as an additive.

2. Almost no desired product was formed by employing substrates with other PG groups such as Me, Boc, Ac and benzyl, as these kinds of substrates are too reactive and may undergo many side reactions such as hydration reaction, dimerization reaction and decomposition under the acidic conditions.

3. [3,3] rearrangement vs [1,3] rearrangement:

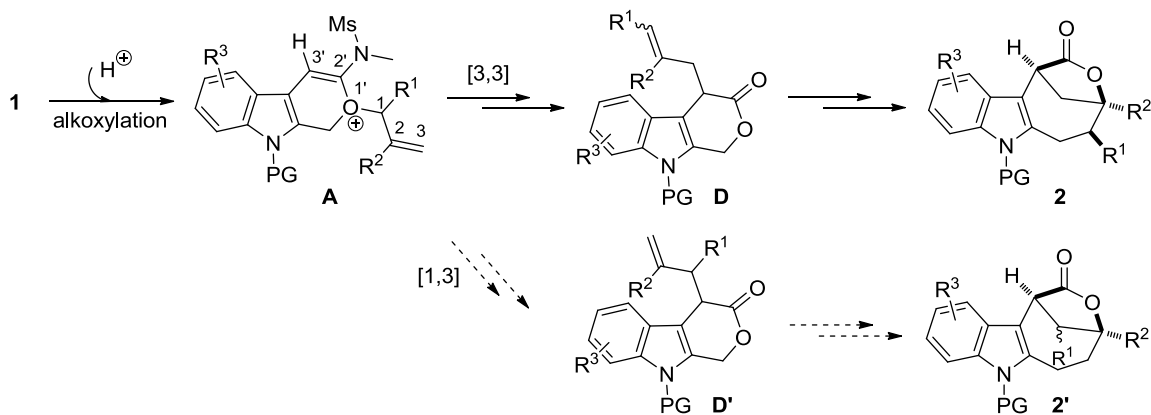

4. We tried various chiral Brønsted acids such as chiral phosphoric acids and chiral phosphoric amides (see as followed), but found that they failed to catalyze this cascade cyclization (most of substrates were recovered).

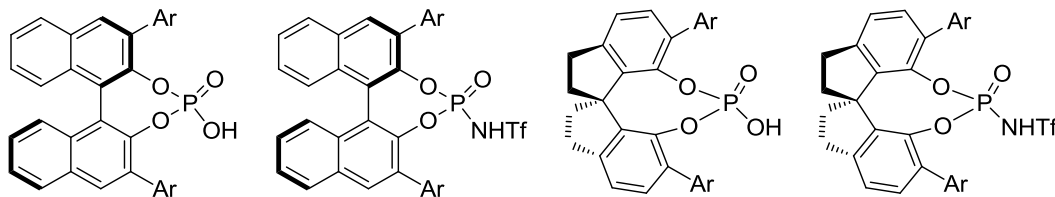

5. Notably, after the reaction was finished (1 h), significant epimerization was observed if prolonging the reaction time.

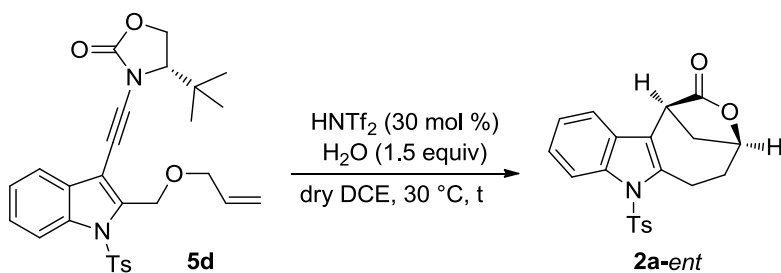

| t/h | 1  | 2  | 4  | 6  | 8  | 10 | 12 | 14 |
|-----|----|----|----|----|----|----|----|----|
| ee% | 95 | 88 | 71 | 60 | 50 | 35 | 15 | 0  |

6. A possible molecular model of transition state to explain the chirality induction (**2a** as an example) has been proposed. Notably, the indole moiety has to occupy the axial



position but not the equatorial position as the indolyl group and oxygen are on the same side of the double bond. In addition, the second chiral center of product **2a** should be induced by the first chiral center (*cis* configuration).

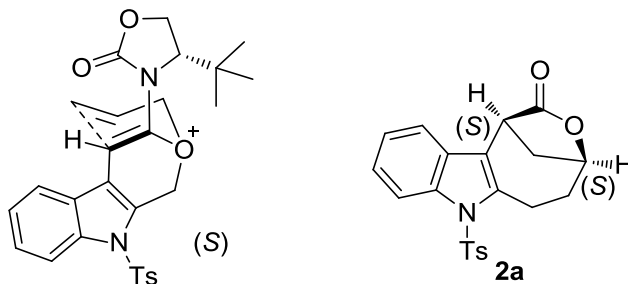

7. For the effects of other metal catalysts on catalyzing the conversion **2aa** into **2a**, see:

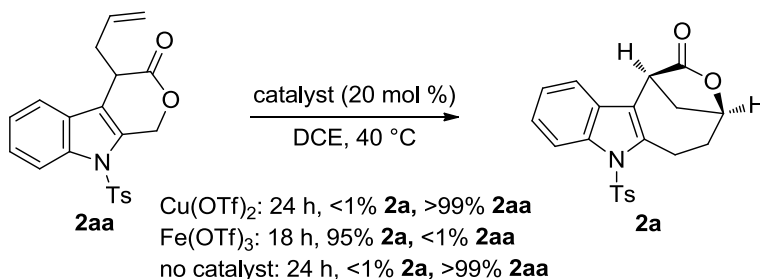

8. **2a** could not be converted into **2ai** in the presence of HNTf<sub>2</sub> and MeOH, and only **2a** was recovered. This result indicated that **2ai** should come from **2aa** but not **2a**.

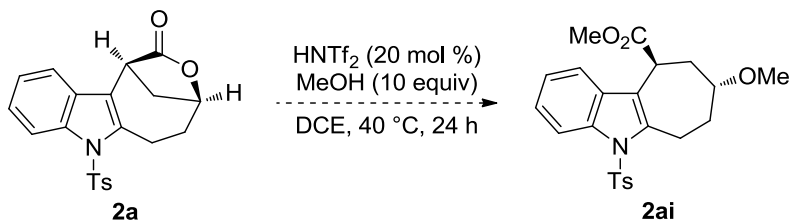

9. Significant incorporation of <sup>18</sup>O (>85%) into the product **2a** was observed in the presence of <sup>18</sup>O-labelled water (10 equiv), indicating that the oxygen atom on the carbonyl group of **2a** originates from water.

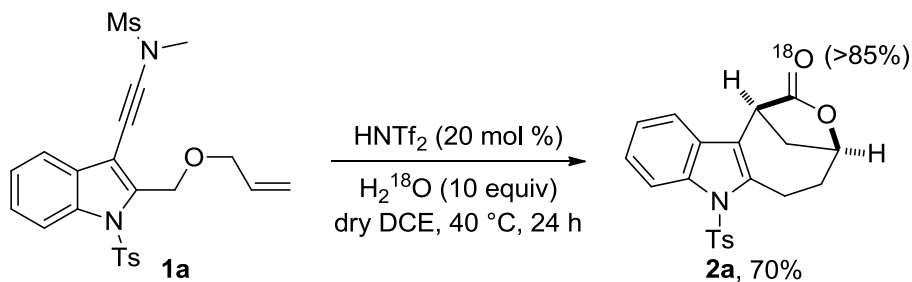

### Cell Viability Assay.

The cytotoxic effects of the indole-fused lactone compounds on human cancer cells (MDA-MB-231, A375, MCF-7, SK-GT-4 and KYSE-450) were investigated using a commercially available proliferation assay kit (Promega, US). Briefly, the cells were plated in 96-well culture plates at an appropriate density in culture medium and allowed to attach overnight. After treatment of vehicle (0.1% DMSO as control) or test compounds for indicated times and concentrations, 20  $\mu$ L of MTS reaction solution (3-(4,5-dimethylthiazol-2-yl)-5-(3-carboxymethoxyphenyl)-2-(4-sulfophenyl)-2H-tetrazolium, inner salt; MTS (a) and 100  $\mu$ g/mL phenazine methosulfate; PES) was added to each well. The absorbance values were read at 490 nm wavelength with a spectrophotometer (Varioskan Flash, Thermo, US) after 1 to 4 hours incubation. The cell viability was calculated as: cell survival = (OD<sub>compd.</sub> - OD<sub>blank</sub>)/(OD<sub>control</sub> - OD<sub>blank</sub>)\*100%.

**Table S1.** The cytotoxic effects of the newly synthesized indole-fused lactone compounds against cancer cells

| Cmpd ID | Cell viability at 20 $\mu$ M (%) |        |        |         |          |
|---------|----------------------------------|--------|--------|---------|----------|
|         | MDA-MB-231                       | A375   | MCF-7  | SK-GT-4 | KYSE-450 |
| 2a      | 99.49                            | 82.26  | 105.05 | 94.43   | 92.88    |
| 2b      | 100.43                           | 87.91  | 109.52 | 93.46   | 85.22    |
| 2c      | 88.17                            | 85.78  | 126.55 | 90.16   | 84.49    |
| 2d      | 90.54                            | 95.18  | 127.82 | 91.23   | 80.40    |
| 2e      | 94.13                            | 86.68  | 89.27  | 93.19   | 87.92    |
| 2f      | 98.84                            | 86.09  | 124.54 | 90.07   | 80.71    |
| 2g      | 95.33                            | 78.72  | 95.25  | 91.62   | 75.82    |
| 2h      | 114.83                           | 99.59  | 92.34  | 101.12  | 83.63    |
| 2i      | 105.53                           | 109.08 | 99.99  | 96.41   | 82.66    |
| 2j      | 112.04                           | 92.08  | 71.80  | 102.95  | 79.56    |
| 2k      | 56.71                            | 40.50  | 98.57  | 72.27   | 76.90    |
| 2l      | 54.71                            | 48.00  | 108.09 | 93.58   | 75.83    |
| 2m      | 86.96                            | 87.76  | 121.30 | 93.12   | 97.55    |
| 2n      | 107.95                           | 103.52 | 112.91 | 102.15  | 101.09   |
| 2o      | 56.27                            | 45.57  | 66.78  | 91.57   | 88.43    |
| 2t      | 95.42                            | 86.75  | 119.05 | 97.59   | 99.96    |
| 2z      | 93.06                            | 94.49  | 100.37 | 96.98   | 91.59    |
| 2ab     | 91.08                            | 102.28 | 113.21 | 95.11   | 84.87    |
| 2ae     | 41.59                            | 33.41  | 70.16  | 64.00   | 37.01    |
| 2af     | 91.12                            | 96.02  | 32.77  | 91.72   | 88.98    |
| 2ah     | 88.27                            | 91.21  | 103.63 | 91.85   | 90.31    |

Results are average of two experiments.

## Experimental Section

### Representative synthetic procedures for the preparation of indole-tethered ynamides **1**:<sup>1-3</sup>

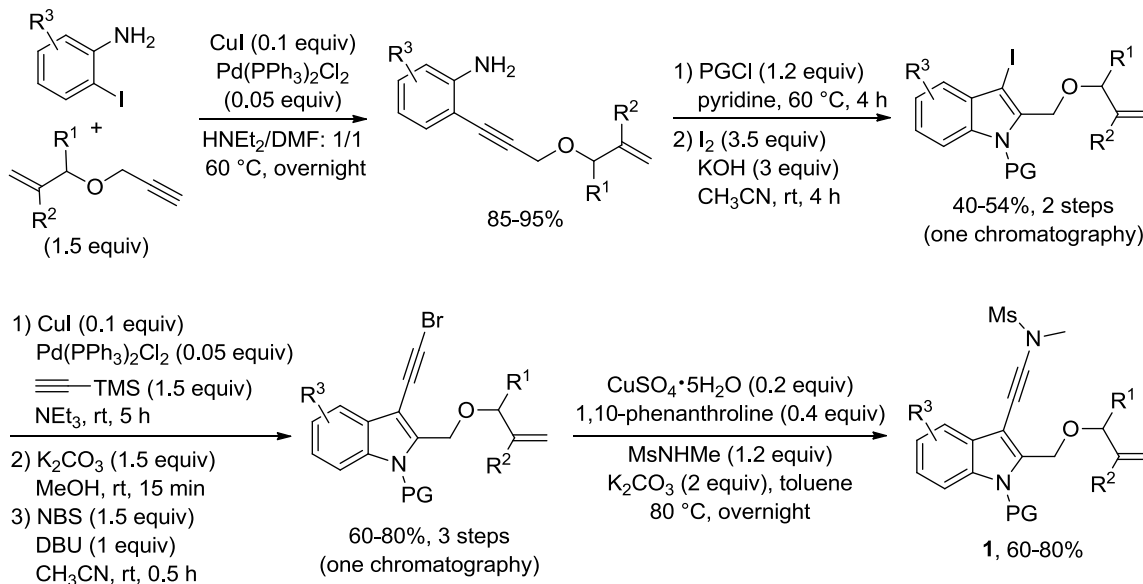

### *N*-((2-((allyloxy)methyl)-1-tosyl-1*H*-indol-3-yl)ethynyl)-*N*-methylmethanesulfonamide (**1a**)

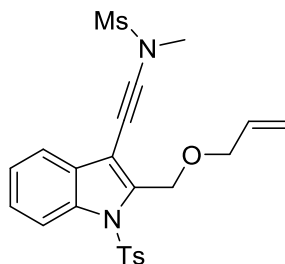

**1a**

Pale yellow solid (mp 110-111 °C). <sup>1</sup>H NMR (400 MHz, CDCl<sub>3</sub>) δ 8.12 (d, *J* = 8.4 Hz, 1H), 7.94 (d, *J* = 8.4 Hz, 2H), 7.58 (d, *J* = 7.6 Hz, 1H), 7.44 – 7.32 (m, 1H), 7.32 – 7.24 (m, 1H), 7.18 (d, *J* = 8.0 Hz, 2H), 6.00 – 5.87 (m, 1H), 5.38 – 5.27 (m, 1H), 5.21 (dd, *J* = 10.4, 1.2 Hz, 1H), 5.02 (s, 2H), 4.06 (dt, *J* = 5.6, 1.2 Hz, 2H), 3.33 (s, 3H), 3.14 (s, 3H), 2.33 (s, 3H); <sup>13</sup>C NMR (125 MHz, CDCl<sub>3</sub>) δ 145.0, 139.3, 135.8, 135.7, 134.6, 129.6, 129.1, 127.4, 126.0, 123.8, 120.2, 117.2, 114.7, 107.5, 89.2, 71.2, 62.6, 60.7, 39.3, 37.0, 21.5; IR (neat): 2923, 2850, 2239(s), 1357(s), 1160, 1108, 576; HRESIMS Calcd for [C<sub>23</sub>H<sub>24</sub>N<sub>2</sub>NaO<sub>5</sub>S<sub>2</sub>]<sup>+</sup> (*M* + Na<sup>+</sup>) 495.1019, found 495.1008.

***N*-((2-((allyloxy)methyl)-5-methyl-1-tosyl-1*H*-indol-3-yl)ethynyl)-*N*-methylmethanesulfonamide (**1b**)**

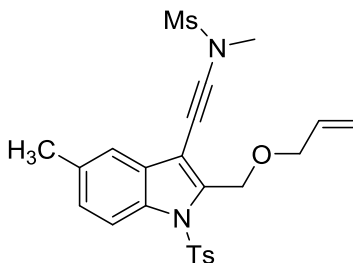

**1b**

Pale yellow solid (mp 115-116 °C). <sup>1</sup>H NMR (400 MHz, CDCl<sub>3</sub>) δ 7.99 (d, *J* = 8.8 Hz, 1H), 7.91 (d, *J* = 8.0 Hz, 2H), 7.35 (s, 1H), 7.22 – 7.12 (m, 3H), 6.03 – 5.81 (m, 1H), 5.30 (d, *J* = 17.2 Hz, 1H), 5.19 (d, *J* = 10.4 Hz, 1H), 4.99 (s, 2H), 4.05 (d, *J* = 4.0 Hz, 2H), 3.34 (s, 3H), 3.14 (s, 3H), 2.42 (s, 3H), 2.32 (s, 3H); <sup>13</sup>C NMR (100 MHz, CDCl<sub>3</sub>) δ 144.8, 139.4, 135.8, 134.6, 134.1, 133.6, 129.5, 129.3, 127.4, 127.3, 120.0, 117.1, 114.4, 107.3, 89.2, 71.1, 62.6, 60.9, 39.3, 37.0, 21.5, 21.2; IR (neat): 2924, 2850, 1774, 1612, 1491, 1362(s), 1147, 584; HRESIMS Calcd for [C<sub>24</sub>H<sub>26</sub>N<sub>2</sub>NaO<sub>5</sub>S<sub>2</sub>]<sup>+</sup> (M + Na<sup>+</sup>) 509.1175, found 509.1168.

***N*-((2-((allyloxy)methyl)-5-methoxy-1-tosyl-1*H*-indol-3-yl)ethynyl)-*N*-methylmethanesulfonamide (**1c**)**

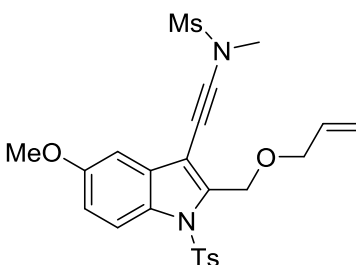

**1c**

Pale yellow oil. <sup>1</sup>H NMR (400 MHz, CDCl<sub>3</sub>) δ 8.00 (d, *J* = 9.2 Hz, 1H), 7.88 (d, *J* = 8.4 Hz, 2H), 7.16 (d, *J* = 8.0 Hz, 2H), 7.00 (d, *J* = 2.4 Hz, 1H), 6.96 (dd, *J* = 9.2, 2.8 Hz, 1H), 6.00 – 5.85 (m, 1H), 5.36 – 5.26 (m, 1H), 5.24 – 5.16 (m, 1H), 4.97 (s, 2H), 4.05 (dt, *J* = 5.6, 1.6 Hz, 2H), 3.83 (s, 3H), 3.33 (s, 3H), 3.13 (s, 3H), 2.31 (s, 3H); <sup>13</sup>C NMR (100 MHz, CDCl<sub>3</sub>) δ 156.8, 144.9, 139.6, 135.5, 134.5, 130.3, 130.2, 129.5, 127.2, 117.0,

115.6, 115.0, 107.5, 102.3, 89.4, 71.1, 62.5, 60.7, 55.6, 39.2, 36.9, 21.4; IR (neat): 2923, 2850, 2240(s), 1359(s), 1172, 1109, 999, 766; HRESIMS Calcd for  $[C_{24}H_{26}N_2NaO_6S_2]^+$  ( $M + Na^+$ ) 525.1124, found 525.1122.

***N*-((2-((allyloxy)methyl)-5-fluoro-1-tosyl-1*H*-indol-3-yl)ethynyl)-*N*-methylmethanesulfonamide (1d)**

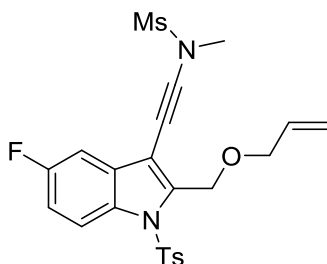

**1d**

Pale yellow solid (mp 115-116 °C).  $^1H$  NMR (400 MHz,  $CDCl_3$ )  $\delta$  8.07 (dd,  $J = 9.2, 4.0$  Hz, 1H), 7.90 (d,  $J = 8.4$  Hz, 2H), 7.29 – 7.13 (m, 3H), 7.13 – 7.02 (m, 1H), 6.03 – 5.74 (m, 1H), 5.31 (dd,  $J = 17.6, 1.6$  Hz, 1H), 5.21 (d,  $J = 10.4$  Hz, 1H), 4.98 (s, 2H), 4.06 (d,  $J = 5.6$  Hz, 2H), 3.33 (s, 3H), 3.13 (s, 3H), 2.32 (s, 3H);  $^{13}C$  NMR (100 MHz,  $CDCl_3$ )  $\delta$  159.8 (d,  $J = 242.2$  Hz), 145.2, 140.8, 135.3, 134.4, 132.0, 130.2 (d,  $J = 9.7$  Hz), 129.6, 127.3, 117.2, 115.9 (d,  $J = 9.7$  Hz), 113.9 (d,  $J = 25.3$  Hz), 107.3 (d,  $J = 4.0$  Hz), 105.7 (d,  $J = 24.3$  Hz), 89.6, 71.2, 62.5, 60.0, 39.1, 37.0, 21.5; IR (neat): 2924, 2356(s), 1357(s), 1262, 1175, 760, 749; HRESIMS Calcd for  $[C_{23}H_{23}FN_2NaO_5S_2]^+$  ( $M + Na^+$ ) 513.0925, found 513.0909.

***N*-((2-((allyloxy)methyl)-5-chloro-1-tosyl-1*H*-indol-3-yl)ethynyl)-*N*-methylmethanesulfonamide (1e)**

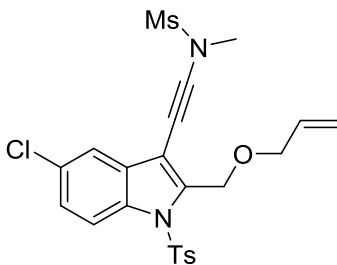

**1e**

Pale yellow oil.  $^1\text{H}$  NMR (400 MHz,  $\text{CDCl}_3$ )  $\delta$  8.04 (d,  $J = 8.8$  Hz, 1H), 7.90 (d,  $J = 8.4$  Hz, 2H), 7.53 (d,  $J = 2.0$  Hz, 1H), 7.36 – 7.28 (m, 1H), 7.19 (d,  $J = 8.4$  Hz, 2H), 5.99 – 5.85 (m, 1H), 5.37 – 5.26 (m, 1H), 5.21 (dd,  $J = 10.4, 1.6$  Hz, 1H), 4.98 (s, 2H), 4.05 (dt,  $J = 5.6, 1.2$  Hz, 2H), 3.33 (s, 3H), 3.14 (s, 3H), 2.34 (s, 3H);  $^{13}\text{C}$  NMR (100 MHz,  $\text{CDCl}_3$ )  $\delta$  145.3, 140.7, 135.4, 134.5, 134.2, 130.4, 129.8, 129.7, 127.4, 126.2, 119.8, 117.3, 115.9, 106.9, 89.6, 71.4, 62.5, 60.1, 39.3, 37.2, 21.6; IR (neat): 2926, 2238(s), 1360(s), 1265, 1175, 1111, 738; HRESIMS Calcd for  $[\text{C}_{23}\text{H}_{23}\text{ClN}_2\text{NaO}_5\text{S}_2]^+$  ( $\text{M} + \text{Na}^+$ ) 529.0629, found 529.0624.

***N*-((2-((allyloxy)methyl)-5-bromo-1-tosyl-1*H*-indol-3-yl)ethynyl)-*N*-methylmethanesulfonamide (1f)**

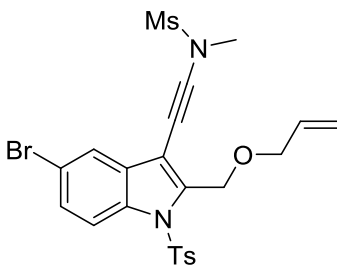

**1f**

Pale yellow solid (mp 130-131 °C).  $^1\text{H}$  NMR (400 MHz,  $\text{CDCl}_3$ )  $\delta$  7.99 (d,  $J = 8.8$  Hz, 1H), 7.90 (d,  $J = 8.4$  Hz, 2H), 7.68 (d,  $J = 1.6$  Hz, 1H), 7.44 (dd,  $J = 8.8, 2.0$  Hz, 1H), 7.18 (d,  $J = 8.4$  Hz, 2H), 6.03 – 5.78 (m, 1H), 5.31 (dd,  $J = 17.6, 1.6$  Hz, 1H), 5.21 (d,  $J = 10.4$  Hz, 1H), 4.98 (s, 2H), 4.05 (d,  $J = 5.2$  Hz, 2H), 3.33 (s, 3H), 3.14 (s, 3H), 2.33 (s, 3H);  $^{13}\text{C}$  NMR (100 MHz,  $\text{CDCl}_3$ )  $\delta$  145.3, 140.5, 135.3, 134.5, 134.4, 130.7, 129.7, 128.8, 127.3, 122.8, 117.3(4), 117.2(8), 116.1, 106.7, 89.5, 71.3, 62.4, 60.0, 39.2, 37.1, 21.5; IR (neat): 2927, 2240(s), 1444, 1360(s), 1175, 999, 688, 581; HRESIMS Calcd for  $[\text{C}_{23}\text{H}_{23}\text{BrN}_2\text{NaO}_5\text{S}_2]^+$  ( $\text{M} + \text{Na}^+$ ) 573.0124, found 573.0129.

***N*-((2-((allyloxy)methyl)-1-tosyl-5-(trifluoromethyl)-1*H*-indol-3-yl)ethynyl)-*N*-methylmethanesulfonamide (1g)**

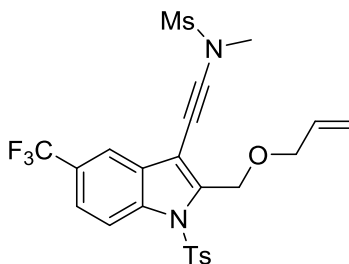

**1g**

Pale yellow solid (mp 150-151 °C).  $^1\text{H}$  NMR (400 MHz,  $\text{CDCl}_3$ )  $\delta$  8.23 (d,  $J = 8.8$  Hz, 1H), 7.95 (d,  $J = 8.4$  Hz, 2H), 7.85 (s, 1H), 7.60 (d,  $J = 8.8$  Hz, 1H), 7.21 (d,  $J = 8.4$  Hz, 2H), 6.08 – 5.90 (m, 1H), 5.31 (dd,  $J = 17.2, 1.6$  Hz, 1H), 5.22 (d,  $J = 10.4$  Hz, 1H), 5.03 (s, 2H), 4.06 (d,  $J = 5.6$  Hz, 2H), 3.35 (s, 3H), 3.15 (s, 3H), 2.35 (s, 3H);  $^{13}\text{C}$  NMR (125 MHz,  $\text{CDCl}_3$ )  $\delta$  145.5, 141.2, 137.2, 135.2, 134.3, 129.8, 128.8, 127.4, 126.2 (q,  $J = 32.5$  Hz), 124.3 (q,  $J = 270.0$  Hz), 122.5 (q,  $J = 3.5$  Hz), 117.8 (q,  $J = 4.0$  Hz), 117.4, 115.0, 107.4, 89.8, 71.3, 62.4, 59.8, 39.2, 37.2, 21.5; IR (neat): 2927, 2241(s), 1361, 1320(s), 1170, 1117, 665, 592; HRESIMS Calcd for  $[\text{C}_{24}\text{H}_{23}\text{F}_3\text{N}_2\text{NaO}_5\text{S}_2]^+$  ( $\text{M} + \text{Na}^+$ ) 563.0893, found 563.0888.

***N*-((2-((allyloxy)methyl)-5-cyano-1-tosyl-1*H*-indol-3-yl)ethynyl)-*N*-methylmethanesulfonamide (1h)**

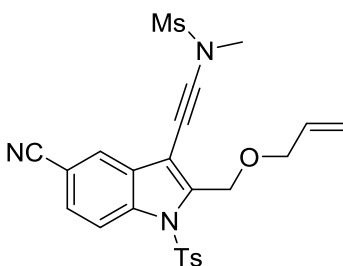

**1h**

Pale yellow oil.  $^1\text{H}$  NMR (400 MHz,  $\text{CDCl}_3$ )  $\delta$  8.21 (dd,  $J = 8.8, 0.8$  Hz, 1H), 8.02 – 7.82 (m, 3H), 7.60 (dd,  $J = 8.8, 1.6$  Hz, 1H), 7.22 (d,  $J = 8.4$  Hz, 2H), 5.98 – 5.87 (m, 1H), 5.36 – 5.27 (m, 1H), 5.26 – 5.17 (m, 1H), 5.01 (s, 2H), 4.06 (dt,  $J = 5.6, 1.2$  Hz, 2H), 3.35 (s, 3H), 3.15 (s, 3H), 2.36 (s, 3H);  $^{13}\text{C}$  NMR (100 MHz,  $\text{CDCl}_3$ )  $\delta$  145.7, 141.5, 137.4, 135.1, 134.2, 129.8, 129.2, 128.7, 127.5, 125.1, 118.9, 117.4, 115.5, 107.4, 107.0, 90.1, 71.4, 62.3, 59.4, 39.1, 37.3, 21.5; IR (neat): 2922, 2851, 2358, 2238(s), 1659, 1632,

1361(s), 1176, 737; HRESIMS Calcd for  $[C_{24}H_{23}N_3NaO_5S_2]^+$  ( $M + Na^+$ ) 520.0971, found 520.0972.

**methyl 2-((allyloxy)methyl)-3-((*N*-methoxymethylsulfonamido)ethynyl)-1-tosyl-1*H*-indole-5-carboxylate (1i)**

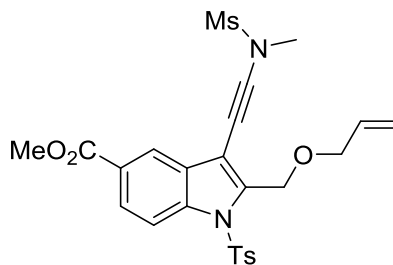

**1i**

Pale yellow oil.  $^1H$  NMR (400 MHz,  $CDCl_3$ )  $\delta$  8.26 (d,  $J = 1.2$  Hz, 1H), 8.16 (d,  $J = 8.8$  Hz, 1H), 8.03 (dd,  $J = 8.8, 1.6$  Hz, 1H), 7.93 (d,  $J = 8.4$  Hz, 2H), 7.19 (d,  $J = 8.2$  Hz, 2H), 5.85 – 5.98 (m, 1H), 5.36 – 5.27 (m, 1H), 5.20 (dd,  $J = 10.4, 1.2$  Hz, 1H), 5.01 (s, 2H), 4.06 (dd,  $J = 4.4, 1.2$  Hz, 2H), 3.93 (s, 3H), 3.35 (s, 3H), 3.15 (s, 3H), 2.33 (s, 3H);  $^{13}C$  NMR (100 MHz,  $CDCl_3$ )  $\delta$  166.8, 145.3, 140.8, 138.2, 135.2, 134.3, 129.6, 128.8, 127.4, 126.9, 125.8, 122.3, 117.2, 114.4, 107.7, 89.6, 71.2, 62.4, 59.9, 52.1, 39.2, 37.0, 21.5; IR (neat): 2923, 2367, 2240(s), 1717(s), 1358(s), 1289, 1174, 758; HRESIMS Calcd for  $[C_{25}H_{26}N_2NaO_7S_2]^+$  ( $M + Na^+$ ) 553.1074, found 553.1075.

***N*-((2-((allyloxy)methyl)-6-methyl-1-tosyl-1*H*-indol-3-yl)ethynyl)-*N*-methoxymethanesulfonamide (1j)**

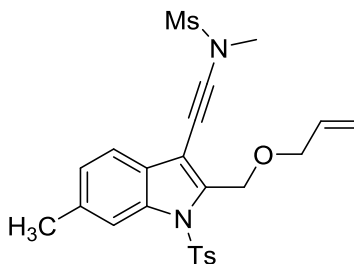

**1j**

Pale yellow oil.  $^1H$  NMR (400 MHz,  $CDCl_3$ )  $\delta$  7.95 – 7.87 (m, 3H), 7.45 (d,  $J = 8.0$  Hz, 1H), 7.18 (d,  $J = 8.0$  Hz, 2H), 7.10 (dd,  $J = 8.0, 0.8$  Hz, 1H), 5.99 – 5.84 (m, 1H), 5.36 – 5.26 (m, 1H), 5.24 – 5.15 (m, 1H), 4.99 (s, 2H), 4.03 (dt,  $J = 5.6, 1.2$  Hz, 2H), 3.33 (s,



3H), 3.13 (s, 3H), 2.49 (s, 3H), 2.34 (s, 3H);  $^{13}\text{C}$  NMR (100 MHz,  $\text{CDCl}_3$ )  $\delta$  144.8, 138.6, 136.2, 135.7, 134.5, 129.5, 127.2, 126.8, 125.3, 119.7, 117.0, 114.6, 107.5, 89.1, 71.0, 62.6, 60.8, 39.2, 36.9, 22.1, 21.5; IR (neat): 2927, 2241(s), 1361, 1326(s), 1176, 1117, 665, 592; HRESIMS Calcd for  $[\text{C}_{24}\text{H}_{26}\text{N}_2\text{NaO}_5\text{S}_2]^+$  ( $\text{M} + \text{Na}^+$ ) 509.1175, found 509.1173.

***N*-((2-((allyloxy)methyl)-6-methoxy-1-tosyl-1*H*-indol-3-yl)ethynyl)-*N*-methylmethanesulfonamide (1k)**

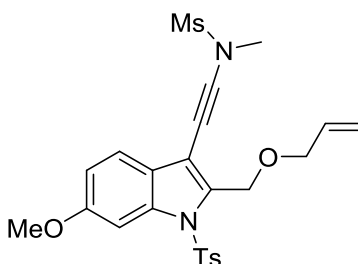

**1k**

Pale yellow oil.  $^1\text{H}$  NMR (500 MHz,  $\text{CDCl}_3$ )  $\delta$  7.91 (d,  $J = 8.0$  Hz, 2H), 7.65 (d,  $J = 2.0$  Hz, 1H), 7.44 (d,  $J = 9.0$  Hz, 1H), 7.18 (d,  $J = 8.0$  Hz, 2H), 6.90 (dd,  $J = 8.5, 2.0$  Hz, 1H), 5.99 – 5.83 (m, 1H), 5.34 – 5.26 (m, 1H), 5.19 (dd,  $J = 5.5, 1.5$  Hz, 1H), 4.96 (s, 2H), 4.04 (dt,  $J = 5.5, 1.5$  Hz, 2H), 3.88 (s, 3H), 3.32 (s, 3H), 3.13 (s, 3H), 2.33 (s, 3H);  $^{13}\text{C}$  NMR (125MHz,  $\text{CDCl}_3$ )  $\delta$  158.9, 144.9, 138.1, 136.9, 135.7, 134.6, 129.6, 127.3, 122.8, 120.7, 117.0, 113.0, 107.5, 99.0, 89.1, 71.0, 62.7, 60.9, 55.8, 39.2, 36.9, 21.5; IR (neat): 2927, 2240(s), 1445, 1360(s), 1176, 960, 582; HRESIMS Calcd for  $[\text{C}_{24}\text{H}_{26}\text{N}_2\text{NaO}_6\text{S}_2]^+$  ( $\text{M} + \text{Na}^+$ ) 525.1124, found 525.1118.

***N*-((2-((allyloxy)methyl)-6-fluoro-1-tosyl-1*H*-indol-3-yl)ethynyl)-*N*-methylmethanesulfonamide (1l)**

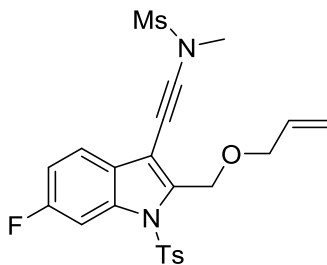

**1l**

Pale yellow oil.  $^1\text{H}$  NMR (400 MHz,  $\text{CDCl}_3$ )  $\delta$  7.92 (d,  $J = 8.4$  Hz, 2H), 7.84 (dd,  $J = 10.0, 2.0$  Hz, 1H), 7.50 (dd,  $J = 8.4, 5.2$  Hz, 1H), 7.19 (d,  $J = 8.4$  Hz, 2H), 7.11 – 6.86 (m, 1H), 6.01 – 5.80 (m, 1H), 5.35 – 5.27 (m, 1H), 5.24 – 5.17 (m, 1H), 4.96 (s, 2H), 4.04 (dt,  $J = 5.6, 1.2$  Hz, 2H), 3.32 (s, 3H), 3.13 (s, 3H), 2.32 (s, 3H);  $^{13}\text{C}$  NMR (100 MHz,  $\text{CDCl}_3$ )  $\delta$  161.4 (d,  $J = 242.7$  Hz), 145.2, 139.4 (d,  $J = 3.8$  Hz), 135.8 (d,  $J = 12.7$  Hz), 135.2, 134.4, 129.6, 127.3, 125.2, 121.1 (d,  $J = 10.0$  Hz), 117.1, 112.2 (d,  $J = 24.4$  Hz), 107.2, 102.0 (d,  $J = 29.3$  Hz), 89.4, 71.0, 62.4, 60.2, 39.1, 36.9, 21.4; IR (neat): 2924, 2356(s), 1357(s), 1274, 1262, 1175, 764, 749; HRESIMS Calcd for  $[\text{C}_{23}\text{H}_{23}\text{FN}_2\text{NaO}_5\text{S}_2]^+$  ( $\text{M} + \text{Na}^+$ ) 513.0925, found 513.0923.

***N*-((2-((allyloxy)methyl)-6-chloro-1-tosyl-1*H*-indol-3-yl)ethynyl)-*N*-methylmethanesulfonamide (**1m**)**

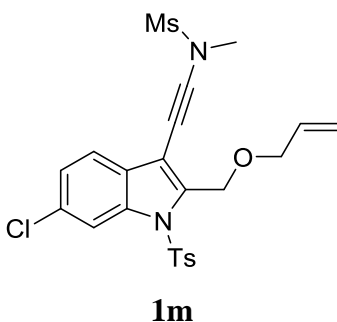

Pale yellow solid (mp 110-111 °C).  $^1\text{H}$  NMR (400 MHz,  $\text{CDCl}_3$ )  $\delta$  8.04 (d,  $J = 8.8$  Hz, 1H), 7.90 (d,  $J = 8.4$  Hz, 2H), 7.53 (d,  $J = 2.0$  Hz, 1H), 7.31 (dd,  $J = 9.2, 2.0$  Hz, 1H), 7.19 (d,  $J = 8.4$  Hz, 2H), 6.02 – 5.83 (m, 1H), 5.31 (dd,  $J = 17.2, 1.2$  Hz, 1H), 5.21 (dd,  $J = 10.4, 1.2$  Hz, 1H), 4.98 (s, 2H), 4.05 (d,  $J = 5.6$  Hz, 2H), 3.33 (s, 3H), 3.14 (s, 3H), 2.34 (s, 3H);  $^{13}\text{C}$  NMR (100 MHz,  $\text{CDCl}_3$ )  $\delta$  145.3, 140.7, 135.4, 134.4, 134.1, 130.3, 129.8, 129.7, 127.3, 126.2, 119.8, 117.3, 115.8, 106.8, 89.5, 71.3, 62.5, 60.0, 39.2, 37.1, 21.5; IR (neat): 2926, 2238(s), 1445, 1360(s), 1265, 1175, 1111, 1000, 738, 583; HRESIMS Calcd for  $[\text{C}_{23}\text{H}_{23}\text{ClN}_2\text{NaO}_5\text{S}_2]^+$  ( $\text{M} + \text{Na}^+$ ) 529.0629, found 529.0629.

***N*-((2-((allyloxy)methyl)-6-bromo-1-tosyl-1*H*-indol-3-yl)ethynyl)-*N*-methylmethanesulfonamide (**1n**)**

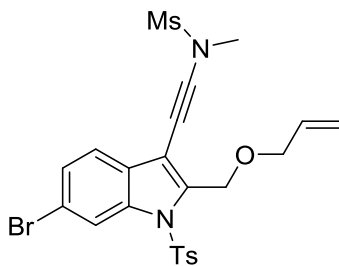

**1n**

Pale yellow oil.  $^1\text{H}$  NMR (400 MHz,  $\text{CDCl}_3$ )  $\delta$  8.30 (s, 1H), 7.91 (d,  $J = 8.0$  Hz, 2H), 7.46 – 7.35 (m, 2H), 7.21 (d,  $J = 8.0$  Hz, 2H), 6.02 – 5.78 (m, 1H), 5.30 (d,  $J = 17.2$  Hz, 1H), 5.20 (d,  $J = 10.4$  Hz, 1H), 4.97 (s, 2H), 4.04 (d,  $J = 4.4$  Hz, 2H), 3.33 (s, 3H), 3.13 (s, 3H), 2.35 (s, 3H);  $^{13}\text{C}$  NMR (125 MHz,  $\text{CDCl}_3$ )  $\delta$  145.3, 139.7, 136.4, 135.4, 134.4, 129.7, 127.9, 127.4, 127.2, 121.4, 119.7, 117.7, 117.3, 107.3, 89.5, 71.3, 62.5, 60.2, 39.2, 37.1, 21.6; IR (neat): 2927, 2240(s), 1444, 1360(s), 1266, 1175, 1112, 999, 581; HRESIMS Calcd for  $[\text{C}_{23}\text{H}_{23}\text{BrN}_2\text{NaO}_5\text{S}_2]^+$  ( $\text{M} + \text{Na}^+$ ) 573.0124, found 573.0127.

**methyl 2-((allyloxy)methyl)-3-((N-methylmethanesulfonyl)ethynyl)-1-tosyl-1H-indole-6-carboxylate (1o)**

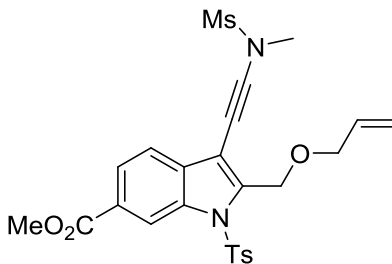

**1o**

Pale yellow oil.  $^1\text{H}$  NMR (500 MHz,  $\text{CDCl}_3$ )  $\delta$  8.82 (s, 1H), 8.05 – 7.90 (m, 3H), 7.61 (d,  $J = 8.5$  Hz, 1H), 7.20 (d,  $J = 8.0$  Hz, 2H), 5.99 – 5.86 (m, 1H), 5.31 (dd,  $J = 18.5, 1.0$  Hz, 1H), 5.21 (d,  $J = 10.5$  Hz, 1H), 5.02 (s, 2H), 4.06 (d,  $J = 5.5$  Hz, 2H), 3.97 (s, 3H), 3.34 (s, 3H), 3.14 (s, 3H), 2.33 (s, 3H);  $^{13}\text{C}$  NMR (125 MHz,  $\text{CDCl}_3$ )  $\delta$  167.0, 145.3, 142.0, 135.3, 135.2, 134.3, 132.6, 129.7, 127.7, 127.4, 124.8, 120.0, 117.3, 116.4, 107.2, 89.5, 71.3, 62.5, 60.1, 52.3, 39.2, 37.1, 21.5; IR (neat): 2923, 2240(s), 1717(s), 1358(s), 1174, 1161, 1089, 685; HRESIMS Calcd for  $[\text{C}_{25}\text{H}_{26}\text{N}_2\text{NaO}_7\text{S}_2]^+$  ( $\text{M} + \text{Na}^+$ ) 553.1074, found 553.1079.

***N*-((2-((allyloxy)methyl)-7-methyl-1-tosyl-1*H*-indol-3-yl)ethynyl)-*N*-methylmethanesulfonamide (1p)**

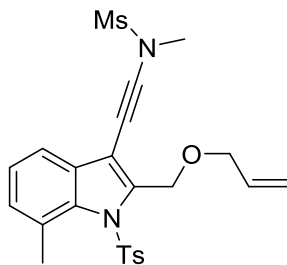

**1p**

Pale yellow oil.  $^1\text{H}$  NMR (400 MHz,  $\text{CDCl}_3$ )  $\delta$  7.68 (d,  $J = 8.4$  Hz, 2H), 7.39 (d,  $J = 7.2$  Hz, 1H), 7.23 – 7.09 (m, 4H), 6.00 – 5.82 (m, 1H), 5.29 (dd,  $J = 17.2, 1.6$  Hz, 1H), 5.17 (dd,  $J = 10.4, 0.8$  Hz, 1H), 5.02 (s, 2H), 4.06 (d,  $J = 5.6$  Hz, 2H), 3.32 (s, 3H), 3.13 (s, 3H), 2.51 (s, 3H), 2.35 (s, 3H);  $^{13}\text{C}$  NMR (100 MHz,  $\text{CDCl}_3$ )  $\delta$  144.4, 142.0, 137.8, 136.1, 134.4, 131.7, 130.0, 129.3, 127.2, 126.6, 124.7, 117.9, 117.0, 110.3, 90.0, 71.3, 64.5, 60.7, 39.1, 36.9, 22.1, 21.4; IR (neat): 2930, 2245(s), 1440, 1368(s), 1260, 1182, 1122, 736, 585; HRESIMS Calcd for  $[\text{C}_{24}\text{H}_{26}\text{N}_2\text{NaO}_5\text{S}_2]^+$  ( $\text{M} + \text{Na}^+$ ) 509.1175, found 509.1173.

***N*-((2-((allyloxy)methyl)-1-((4-bromophenyl)sulfonyl)-1*H*-indol-3-yl)ethynyl)-*N*-methylmethanesulfonamide (1q)**

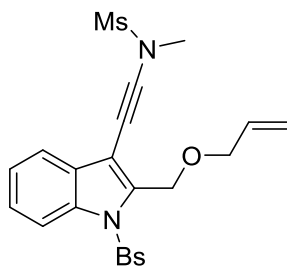

**1q**

Pale yellow oil.  $^1\text{H}$  NMR (400 MHz,  $\text{CDCl}_3$ )  $\delta$  8.09 (d,  $J = 8.4$  Hz, 1H), 7.94 (d,  $J = 8.8$  Hz, 2H), 7.59 (d,  $J = 7.6$  Hz, 1H), 7.52 (d,  $J = 8.8$  Hz, 2H), 7.43 – 7.35 (m, 1H), 7.34 – 7.28 (m, 1H), 6.00 – 5.84 (m, 1H), 5.30 (dd,  $J = 17.6, 1.6$  Hz, 1H), 5.22 (d,  $J = 10.4$  Hz, 1H), 5.00 (s, 2H), 4.05 (d,  $J = 5.6$  Hz, 2H), 3.34 (s, 3H), 3.14 (s, 3H);  $^{13}\text{C}$  NMR (125 MHz,  $\text{CDCl}_3$ )  $\delta$  139.0, 137.4, 135.7, 134.4, 132.3, 129.2, 129.1, 128.9, 126.2, 124.2, 120.4, 117.3, 114.5, 108.2, 89.5, 71.2, 62.5, 60.5, 39.2, 37.0; IR (neat): 2923, 2239(s),

1357(s), 1170, 1160, 1108, 996, 576; HRESIMS Calcd for  $[C_{22}H_{21}BrN_2NaO_5S_2]^+$  ( $M + Na^+$ ) 558.9967, found 558.9974.

***N*-((2-((allyloxy)methyl)-1-(methylsulfonyl)-1*H*-indol-3-yl)ethynyl)-*N*-methylmethanesulfonamide (1r)**

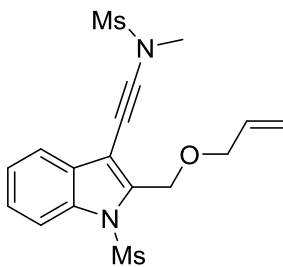

**1r**

Pale yellow oil.  $^1H$  NMR (400 MHz,  $CDCl_3$ )  $\delta$  8.06 (d,  $J = 8.4$  Hz, 1H), 7.65 (d,  $J = 7.2$  Hz, 1H), 7.42 – 7.30 (m, 2H), 6.04 – 5.87 (m, 1H), 5.33 (dd,  $J = 17.2, 1.6$  Hz, 1H), 5.21 (dd,  $J = 10.4, 1.2$  Hz, 1H), 4.93 (s, 2H), 4.12 (d,  $J = 5.6$  Hz, 2H), 3.36 (s, 3H), 3.30 (s, 3H), 3.16 (s, 3H);  $^{13}C$  NMR (100 MHz,  $CDCl_3$ )  $\delta$  138.8, 136.0, 134.2, 128.8, 126.1, 123.9, 120.4, 117.6, 114.1, 106.6, 89.2, 71.5, 62.7, 60.4, 41.6, 39.2, 37.0; IR (neat): 32923, 2850, 2240(s), 1359(s), 1258, 1172, 1109, 999, 766; HRESIMS Calcd for  $[C_{17}H_{20}N_2NaO_5S_2]^+$  ( $M + Na^+$ ) 419.0706, found 419.0711.

***N*-((2-((but-3-en-2-yloxy)methyl)-1-tosyl-1*H*-indol-3-yl)ethynyl)-*N*-methylmethanesulfonamide (1s)**

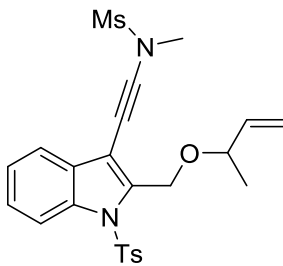

**1s**

Pale yellow oil.  $^1H$  NMR (500 MHz,  $CDCl_3$ )  $\delta$  8.06 (d,  $J = 8.5$  Hz, 1H), 7.96 (d,  $J = 8.5$  Hz, 2H), 7.57 (d,  $J = 7.5$  Hz, 1H), 7.35 – 7.30 (m, 1H), 7.29 – 7.23 (m, 1H), 7.18 (d,  $J = 8.0$  Hz, 2H), 5.91 – 5.79 (m, 1H), 5.32 (d,  $J = 17.0$  Hz, 1H), 5.19 (d,  $J = 10.5$  Hz, 1H), 5.03 (d,  $J = 11.5$  Hz, 1H), 4.84 (d,  $J = 11.5$  Hz, 1H), 4.16 – 4.05 (m, 1H), 3.32 (s, 3H),

3.13 (s, 3H), 2.31 (s, 3H), 1.25 (d,  $J = 6.5$  Hz, 3H);  $^{13}\text{C}$  NMR (125 MHz,  $\text{CDCl}_3$ )  $\delta$  144.9, 140.0, 135.6(7), 135.6(5), 129.5, 129.1, 127.3, 125.8, 123.7, 120.1, 116.1, 114.5, 107.0, 89.1, 77.1, 60.8, 60.7, 39.2, 36.8, 21.5, 21.1; IR (neat): 2930, 2240(s), 1451, 1360(s), 1176, 1165, 997, 747, 578; HRESIMS Calcd for  $[\text{C}_{24}\text{H}_{26}\text{N}_2\text{NaO}_5\text{S}_2]^+$  ( $\text{M} + \text{Na}^+$ ) 509.1175, found 509.1168.

***N*-methyl-*N*-((2-(((2-phenylallyl)oxy)methyl)-1-tosyl-1*H*-indol-3-yl)ethynyl)methanesulfonamide (1t)**

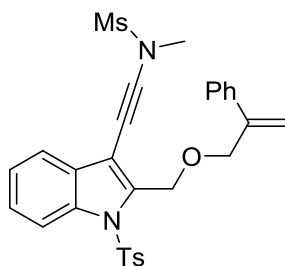

**1t**

Pale yellow oil.  $^1\text{H}$  NMR (400 MHz,  $\text{CDCl}_3$ )  $\delta$  8.11 (d,  $J = 8.4$  Hz, 1H), 7.89 (d,  $J = 8.4$  Hz, 2H), 7.58 (d,  $J = 7.6$  Hz, 1H), 7.53 – 7.45 (m, 2H), 7.40 – 7.22 (m, 5H), 7.11 (d,  $J = 8.4$  Hz, 2H), 5.57 (s, 1H), 5.42 (d,  $J = 1.2$  Hz, 1H), 5.09 (s, 2H), 4.45 (s, 2H), 3.23 (s, 3H), 3.02 (s, 3H), 2.30 (s, 3H);  $^{13}\text{C}$  NMR (125 MHz,  $\text{CDCl}_3$ )  $\delta$  144.9, 143.9, 139.2, 138.8, 135.8, 135.5, 129.6, 129.1, 128.4, 127.8, 127.3, 126.0(4), 125.9(7), 123.8, 120.3, 114.7, 114.4, 107.7, 89.3, 72.1, 62.7, 60.7, 39.1, 36.8, 21.5; IR (neat): 2927, 2868, 2240(s), 1596, 1445, 1360(s), 1176, 577, 590; HRESIMS Calcd for  $[\text{C}_{29}\text{H}_{28}\text{N}_2\text{NaO}_5\text{S}_2]^+$  ( $\text{M} + \text{Na}^+$ ) 571.1332, found 571.1339.

***N*-methyl-*N*-((6-methyl-2-(((2-phenylallyl)oxy)methyl)-1-tosyl-1*H*-indol-3-yl)ethynyl)methanesulfonamide (1u)**

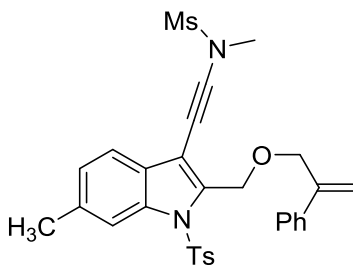

**1u**

Pale yellow oil.  $^1\text{H}$  NMR (500 MHz,  $\text{CDCl}_3$ )  $\delta$  7.95 (s, 1H), 7.90 (d,  $J = 8.5$  Hz, 2H), 7.52 – 7.45 (m, 3H), 7.35 – 7.29 (m, 2H), 7.29 – 7.24 (m, 1H), 7.14 – 7.08 (m, 3H), 5.59 (d,  $J = 0.5$  Hz, 1H), 5.43 (d,  $J = 1.0$  Hz, 1H), 5.08 (s, 2H), 4.46 (s, 2H), 3.23 (s, 3H), 3.03 (s, 3H), 2.50 (s, 3H), 2.30 (s, 3H);  $^{13}\text{C}$  NMR (125 MHz,  $\text{CDCl}_3$ )  $\delta$  144.7, 143.8, 138.7, 138.5, 136.2, 135.6, 135.5, 129.5, 128.3, 127.7, 127.1, 126.8, 126.0, 125.3, 119.8, 114.6, 114.2, 107.6, 89.1, 71.9, 62.6, 60.7, 39.1, 36.7, 22.0, 21.4; IR (neat): 2923, 2239(s), 1446, 1360(s), 1175, 1111, 998, 579; HRESIMS Calcd for  $[\text{C}_{30}\text{H}_{30}\text{N}_2\text{NaO}_5\text{S}_2]^+$  ( $\text{M} + \text{Na}^+$ ) 585.1488, found 585.1491.

***N*-((5-chloro-2-(((2-phenylallyl)oxy)methyl)-1-tosyl-1*H*-indol-3-yl)ethynyl)-*N*-methylmethanesulfonamide (1v)**

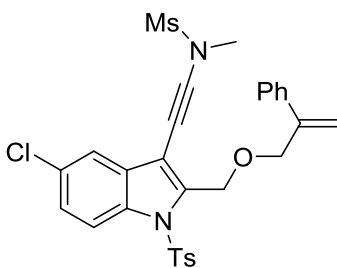

**1v**

Pale yellow oil.  $^1\text{H}$  NMR (400 MHz,  $\text{CDCl}_3$ )  $\delta$  8.03 (d,  $J = 8.8$  Hz, 1H), 7.86 (d,  $J = 8.4$  Hz, 2H), 7.53 (d,  $J = 2.0$  Hz, 1H), 7.47 (d,  $J = 6.8$  Hz, 2H), 7.35 – 7.20 (m, 4H), 7.10 (d,  $J = 8.0$  Hz, 2H), 5.57 (s, 1H), 5.41 (s, 1H), 5.05 (s, 2H), 4.45 (s, 2H), 3.23 (s, 3H), 3.02 (s, 3H), 2.29 (s, 3H);  $^{13}\text{C}$  NMR (100 MHz,  $\text{CDCl}_3$ )  $\delta$  145.2, 143.7, 140.5, 138.6, 135.1, 134.0, 130.3, 129.7, 129.6, 128.3, 127.8, 127.3, 126.1, 126.0, 119.8, 115.8, 114.5, 107.0, 89.5, 72.2, 62.5, 59.9, 39.1, 36.9, 21.5; IR (neat): 2926, 2238(s), 1445, 1359(s), 1175, 1113, 999, 584; HRESIMS Calcd for  $[\text{C}_{29}\text{H}_{27}\text{ClN}_2\text{NaO}_5\text{S}_2]^+$  ( $\text{M} + \text{Na}^+$ ) 605.0942, found 605.0956.

***N*-((6-bromo-2-(((2-phenylallyl)oxy)methyl)-1-tosyl-1*H*-indol-3-yl)ethynyl)-*N*-methylmethanesulfonamide (1w)**

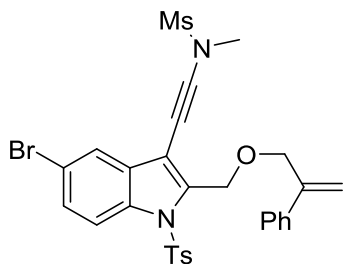

**1w**

Pale yellow solid (mp 120-121 °C).  $^1\text{H}$  NMR (500 MHz,  $\text{CDCl}_3$ )  $\delta$  7.99 (d,  $J = 9.0$  Hz, 1H), 7.87 (d,  $J = 8.5$  Hz, 2H), 7.70 (d,  $J = 1.5$  Hz, 1H), 7.52 – 7.46 (m, 2H), 7.45 (dd,  $J = 9.0, 2.0$  Hz, 1H), 7.35 – 7.23 (m, 3H), 7.11 (d,  $J = 8.0$  Hz, 2H), 5.59 (s, 1H), 5.42 (d,  $J = 1.5$  Hz, 1H), 5.07 (s, 2H), 4.46 (s, 2H), 3.24 (s, 3H), 3.03 (s, 3H), 2.30 (s, 3H);  $^{13}\text{C}$  NMR (125 MHz,  $\text{CDCl}_3$ )  $\delta$  145.2, 143.7, 140.4, 138.6, 135.2, 134.4, 130.8, 129.6, 128.8, 128.3, 127.8, 127.3, 126.0, 122.9, 117.3, 116.1, 114.5, 106.8, 89.6, 72.2, 62.5, 59.9, 39.1, 36.9, 21.5; IR (neat): 2927, 2240(s), 1596, 1445, 1360(s), 1176, 1113, 999, 667; HRESIMS Calcd for  $[\text{C}_{29}\text{H}_{27}\text{BrN}_2\text{NaO}_5\text{S}_2]^+$  ( $\text{M} + \text{Na}^+$ ) 649.0437, found 649.0451.

***N*-methyl-*N*-(((2-((2-*p*-tolyl)allyl)oxy)methyl)-1-tosyl-1*H*-indol-3-yl)ethynyl)methanesulfonamide (1x)**

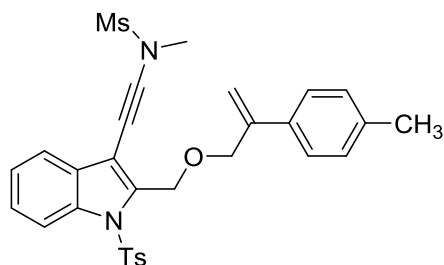

**1x**

Pale yellow oil.  $^1\text{H}$  NMR (400 MHz,  $\text{CDCl}_3$ )  $\delta$  8.11 (d,  $J = 8.4$  Hz, 1H), 7.89 (d,  $J = 8.4$  Hz, 2H), 7.62 – 7.55 (m, 1H), 7.41 – 7.33 (m, 3H), 7.31 – 7.27 (m, 1H), 7.16 – 7.06 (m, 4H), 5.53 (s, 1H), 5.37 (d,  $J = 1.2$  Hz, 1H), 5.08 (s, 2H), 4.43 (s, 2H), 3.23 (s, 3H), 3.03 (s, 3H), 2.32 (s, 3H), 2.30 (s, 3H);  $^{13}\text{C}$  NMR (100 MHz,  $\text{CDCl}_3$ )  $\delta$  144.8, 143.7, 139.3, 137.5, 135.9, 135.8, 135.6, 129.5, 129.1, 129.0, 127.3, 125.9(3), 125.9(1), 123.8, 120.3, 114.7, 113.5, 107.6, 89.3, 72.1, 62.7, 60.7, 39.1, 36.8, 21.5, 21.1; IR (neat): 2923, 2240(s), 1446, 1365(s), 1170, 1111, 998, 580; HRESIMS Calcd for  $[\text{C}_{30}\text{H}_{30}\text{N}_2\text{NaO}_5\text{S}_2]^+$  ( $\text{M} + \text{Na}^+$ ) 585.1488, found 585.1491.



***N*-((2-(((2-(4-chlorophenyl)allyl)oxy)methyl)-1-tosyl-1*H*-indol-3-yl)ethynyl)-*N*-methylmethanesulfonamide (1y)**

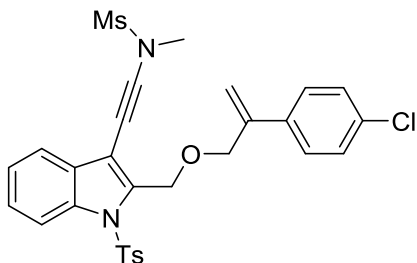

**1y**

Pale yellow oil.  $^1\text{H}$  NMR (500 MHz,  $\text{CDCl}_3$ )  $\delta$  8.08 (d,  $J = 7.5$  Hz, 1H), 7.84 (d,  $J = 7.0$  Hz, 2H), 7.57 (d,  $J = 7.0$  Hz, 1H), 7.48 – 7.16 (m, 6H), 7.07 (d,  $J = 7.0$  Hz, 2H), 5.55 (s, 1H), 5.41 (s, 1H), 5.05 (s, 2H), 4.43 (s, 2H), 3.25 (s, 3H), 3.06 (s, 3H), 2.28 (s, 3H);  $^{13}\text{C}$  NMR (125 MHz,  $\text{CDCl}_3$ )  $\delta$  144.9, 142.9, 139.1, 137.1, 135.8, 135.5, 133.5, 129.5, 129.0, 128.4, 127.5, 127.2, 126.0, 123.8, 120.2, 115.2, 114.7, 107.7, 89.4, 72.2, 62.7, 60.6, 39.1, 36.9, 21.5; IR (neat): 2932, 2250(s), 1443, 1370(s), 1260, 1182, 1122, 736, 575; HRESIMS Calcd for  $[\text{C}_{29}\text{H}_{27}\text{ClN}_2\text{NaO}_5\text{S}_2]^+$  ( $\text{M} + \text{Na}^+$ ) 605.0942, found 605.0956.

***N*-methyl-*N*-((2-(((2-methylallyl)oxy)methyl)-1-tosyl-1*H*-indol-3-yl)ethynyl)methanesulfonamide (1z)**

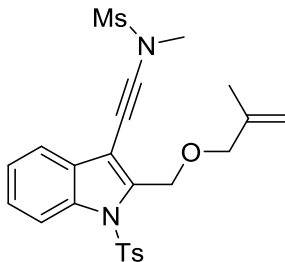

**1z**

Pale yellow oil.  $^1\text{H}$  NMR (400 MHz,  $\text{CDCl}_3$ )  $\delta$  8.11 (d,  $J = 8.4$  Hz, 1H), 7.93 (d,  $J = 8.4$  Hz, 2H), 7.58 (dd,  $J = 7.6, 0.4$  Hz, 1H), 7.39 – 7.33 (m, 1H), 7.31 – 7.27 (m, 1H), 7.17 (d,  $J = 8.0$  Hz, 2H), 5.03 (d,  $J = 1.2$  Hz, 1H), 5.00 (s, 2H), 4.93 (d,  $J = 0.4$  Hz, 1H), 3.97 (s, 2H), 3.33 (s, 3H), 3.13 (s, 3H), 2.33 (s, 3H), 1.77 (s, 3H);  $^{13}\text{C}$  NMR (100 MHz,  $\text{CDCl}_3$ )  $\delta$  144.9, 142.1, 139.5, 135.8, 135.7, 129.6, 129.2, 127.4, 125.9, 123.8, 120.2, 114.7, 112.1, 107.5, 89.2, 74.1, 62.6, 60.8, 39.2, 36.9, 21.5, 19.6; IR (neat): 2923, 2239(s), 1446,

1360(s), 1170, 1111, 1089, 998, 579; HRESIMS Calcd for  $[C_{24}H_{26}N_2NaO_5S_2]^+$  ( $M + Na^+$ ) 509.1175, found 509.1182.

***N*-((2-((allyloxy)methyl)benzofuran-3-yl)ethynyl)-*N*-methylmethanesulfonamide (3a)**

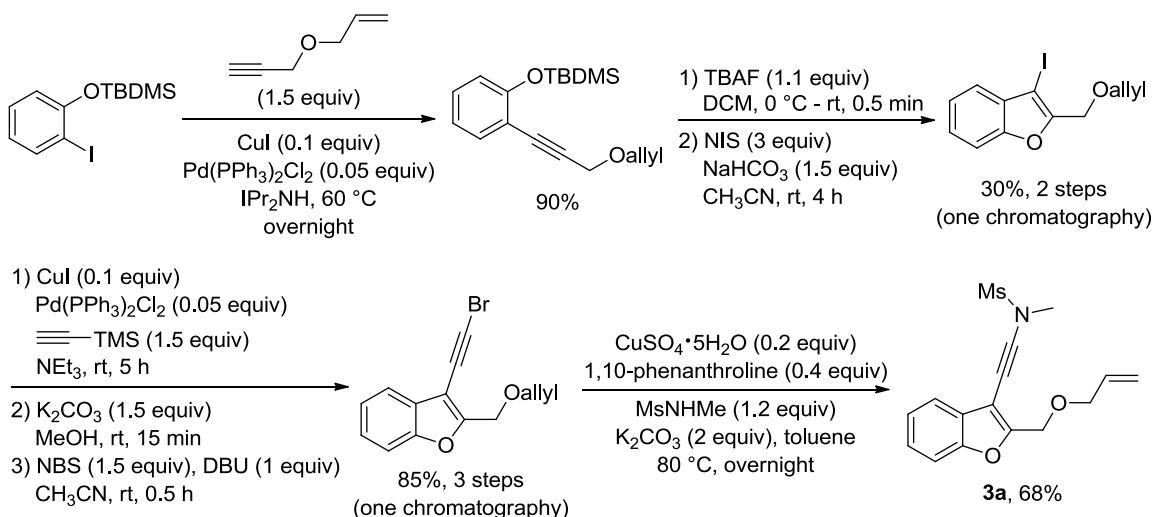

Compound **3a** was prepared according to the above known procedures.<sup>1-3</sup> Pale yellow oil.  $^1H$  NMR (400 MHz,  $CDCl_3$ )  $\delta$  7.64 – 7.56 (m, 1H), 7.51 – 7.43 (m, 1H), 7.37 – 7.26 (m, 2H), 6.02 – 5.88 (m, 1H), 5.41 – 5.30 (m, 1H), 5.28 – 5.19 (m, 1H), 4.71 (s, 2H), 4.11 (dt,  $J = 5.6, 1.6$  Hz, 2H), 3.35 (s, 3H), 3.16 (s, 3H);  $^{13}C$  NMR (100 MHz,  $CDCl_3$ )  $\delta$  157.3, 154.3, 134.1, 128.2, 125.5, 123.3, 120.3, 117.9, 111.6, 102.8, 88.8, 71.5, 62.7, 59.2, 39.3, 36.9; IR (neat): 2922, 2851, 2239(s), 1469, 1356(s), 1158, 945, 747; HRESIMS Calcd for  $[C_{16}H_{17}NNaO_4S]^+$  ( $M + Na^+$ ) 342.0770, found 342.0770.

***N*-((2-((allyloxy)methyl)-1-tosyl-1*H*-pyrrol-3-yl)ethynyl)-*N*-methylmethanesulfonamide (3b)**

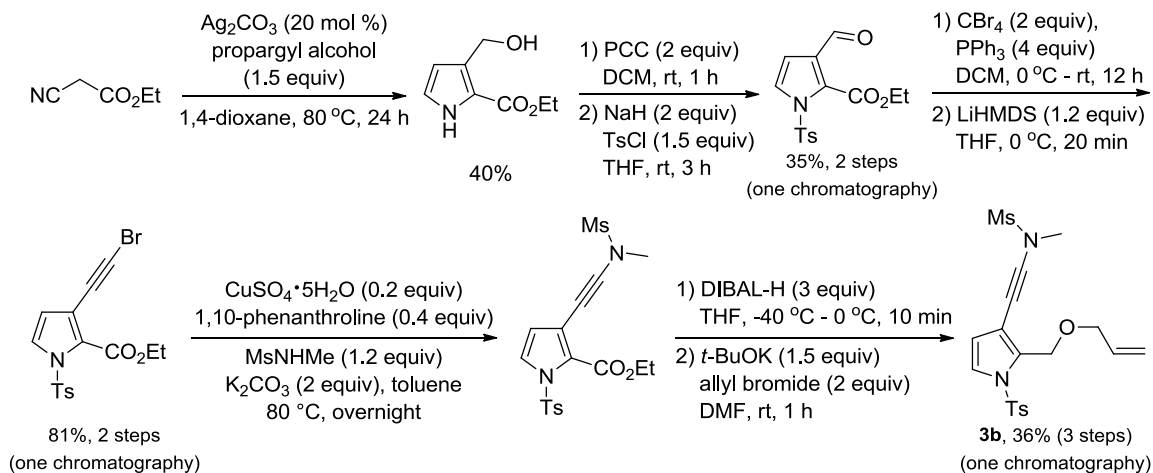

Compound **3b** was prepared according to the above known procedures.<sup>1-4</sup> Pale yellow oil. <sup>1</sup>H NMR (400 MHz, CDCl<sub>3</sub>) δ 7.82 (d, *J* = 8.4 Hz, 2H), 7.32 – 7.22 (m, 3H), 6.27 (d, *J* = 3.2 Hz, 1H), 5.84 – 5.69 (m, 1H), 5.25 – 5.08 (m, 2H), 4.72 (s, 2H), 3.84 (dt, *J* = 5.6, 1.2 Hz, 2H), 3.24 (s, 3H), 3.06 (s, 3H), 2.39 (s, 3H); <sup>13</sup>C NMR (100 MHz, CDCl<sub>3</sub>) δ 145.0, 135.9, 134.5, 134.3, 129.6, 127.6, 123.2, 116.9, 114.0, 111.5, 85.7, 70.6, 62.3, 61.1, 39.1, 36.8, 21.5; IR (neat): 2926, 2238(s), 1445, 1360(s), 1265, 1175, 1111, 1000, 738, 583; HRESIMS Calcd for [C<sub>19</sub>H<sub>22</sub>N<sub>2</sub>NaO<sub>5</sub>S<sub>2</sub>]<sup>+</sup> (M + Na<sup>+</sup>) 445.0862, found 445.0863.

### *N*-((2-((allyloxy)methyl)-4,5-dimethoxyphenyl)ethynyl)-*N*-methylmethanesulfonamide (**3c**)

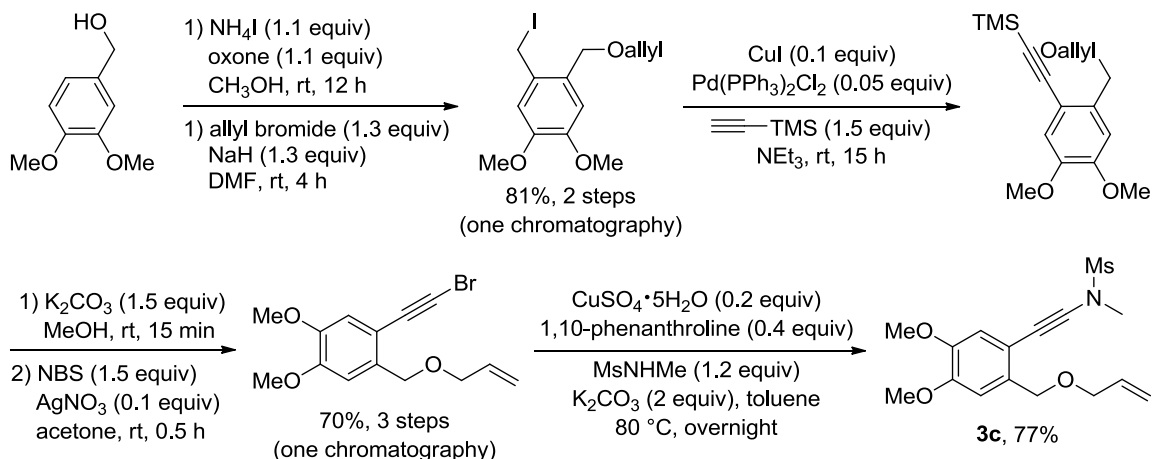

Compound **3c** was prepared according to the above known procedures.<sup>1-3</sup> Pale yellow solid (mp 100-101 °C). <sup>1</sup>H NMR (500 MHz, CDCl<sub>3</sub>) δ 6.97 (s, 1H), 6.88 (s, 1H), 6.06 – 5.90 (m, 1H), 5.31 (dd, *J* = 17.5, 1.5 Hz, 1H), 5.20 (dd, *J* = 10.0, 1.0 Hz, 1H), 4.59 (s,

2H), 4.06 (t,  $J = 1.0$  Hz, 2H), 3.90 (s, 3H), 3.86 (s, 3H), 3.29 (s, 3H), 3.12 (s, 3H);  $^{13}\text{C}$  NMR (125 MHz,  $\text{CDCl}_3$ )  $\delta$  149.4, 148.0, 134.8, 133.6, 117.1, 114.4, 113.1, 111.1, 85.7, 71.3, 70.1, 67.3, 56.0, 55.9, 39.2, 36.7; IR (neat): 2927, 2240, 1596, 1445, 1360(s), 1176, 1088, 960, 590; HRESIMS Calcd for  $[\text{C}_{16}\text{H}_{21}\text{NNaO}_5\text{S}]^+$  ( $\text{M} + \text{Na}^+$ ) 362.1033, found 362.1035.

**(E)-N-((2-((but-2-en-1-yloxy)methyl)-1-tosyl-1H-indol-3-yl)ethynyl)-N-methylmethanesulfonamide (3d)**

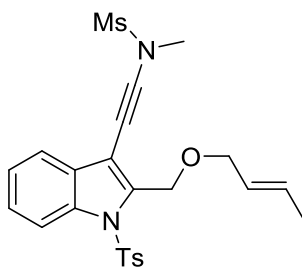

**3d**

Compound **3d** was prepared according to the general procedures for the synthesis of ynamides **1**.<sup>1-3</sup> Pale yellow oil.  $^1\text{H}$  NMR (400 MHz,  $\text{CDCl}_3$ )  $\delta$  8.13 (d,  $J = 8.4$  Hz, 1H), 7.93 (d,  $J = 8.4$  Hz, 2H), 7.66 – 7.51 (m, 1H), 7.41 – 7.32 (m, 1H), 7.30 – 7.24 (m, 1H), 7.17 (d,  $J = 8.0$  Hz, 2H), 5.84 – 5.65 (m, 1H), 5.65 – 5.49 (m, 1H), 4.98 (s, 2H), 3.98 (d,  $J = 6.4$  Hz, 2H), 3.33 (s, 3H), 3.13 (s, 3H), 2.32 (s, 3H), 1.72 (dd,  $J = 6.4, 1.2$  Hz, 3H);  $^{13}\text{C}$  NMR (100 MHz,  $\text{CDCl}_3$ )  $\delta$  144.8, 139.4, 135.8, 135.7, 129.5(4), 129.4(6), 129.0, 127.3, 125.8, 123.7, 120.1, 114.6, 107.3, 89.2, 70.8, 62.3, 60.6, 39.2, 36.8, 21.4, 17.7; IR (neat): 2930, 2245(s), 1360, 1107, 1090, 748, 580; HRESIMS Calcd for  $[\text{C}_{24}\text{H}_{26}\text{N}_2\text{NaO}_5\text{S}_2]^+$  ( $\text{M} + \text{Na}^+$ ) 509.1175, found 509.1179.

**N-allyl-N-((3-((N-methylmethanesulfonamido)ethynyl)-1-tosyl-1H-indol-2-yl)methyl)methanesulfonamide (3e)**

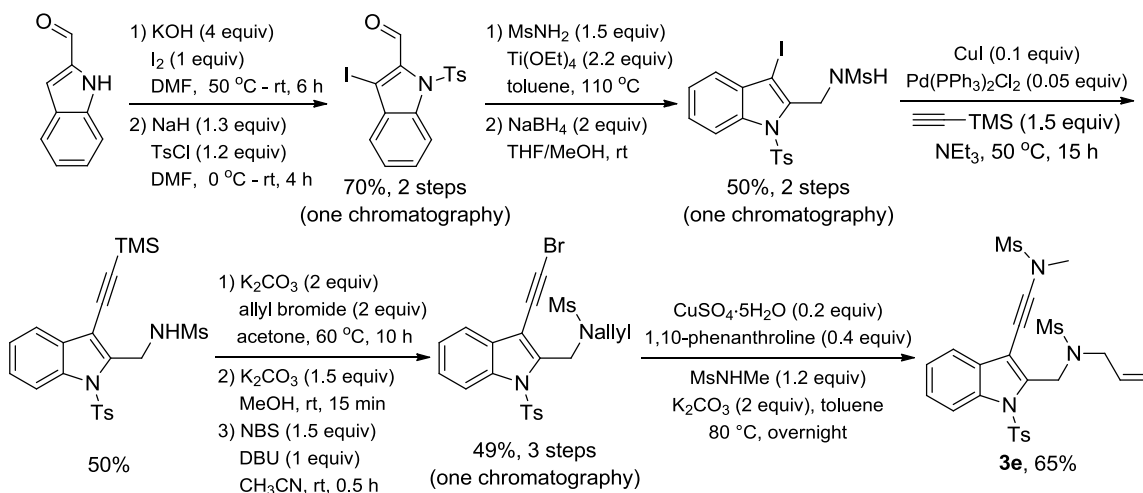

Compound **3e** was prepared according to the above known procedures.<sup>1-3</sup> Pale yellow oil. <sup>1</sup>H NMR (500 MHz, CDCl<sub>3</sub>) δ 8.14 (d, *J* = 8.0 Hz, 1H), 7.62 (d, *J* = 8.0 Hz, 2H), 7.57 (d, *J* = 7.5 Hz, 1H), 7.43 – 7.34 (m, 1H), 7.33 – 7.27 (m, 1H), 7.19 (d, *J* = 8.0 Hz, 2H), 5.83 – 5.67 (m, 1H), 5.14 (d, *J* = 17.0 Hz, 1H), 5.07 (d, *J* = 10.0 Hz, 1H), 4.98 (s, 2H), 3.90 (d, *J* = 6.5 Hz, 2H), 3.35 (s, 3H), 3.16 (s, 3H), 2.96 (s, 3H), 2.33 (s, 3H); <sup>13</sup>C NMR (125 MHz, CDCl<sub>3</sub>) δ 145.5, 136.9, 136.4, 134.8, 132.5, 130.1, 130.0, 126.5, 126.2, 124.5, 120.3, 118.9, 115.2, 109.2, 91.0, 60.2, 50.3, 44.0, 39.9, 39.2, 37.2, 21.5; IR (neat): 2926, 2235(s), 1440, 1363(s), 1265, 1175, 1111, 1000, 738, 585; HRESIMS Calcd for [C<sub>24</sub>H<sub>27</sub>N<sub>3</sub>NaO<sub>6</sub>S<sub>3</sub>]<sup>+</sup> (M + Na<sup>+</sup>) 572.0954, found 572.0956.

***N*-((2-((allylthio)methyl)-1-tosyl-1*H*-indol-3-yl)ethynyl)-*N*-methylmethanesulfonamide (3f)**

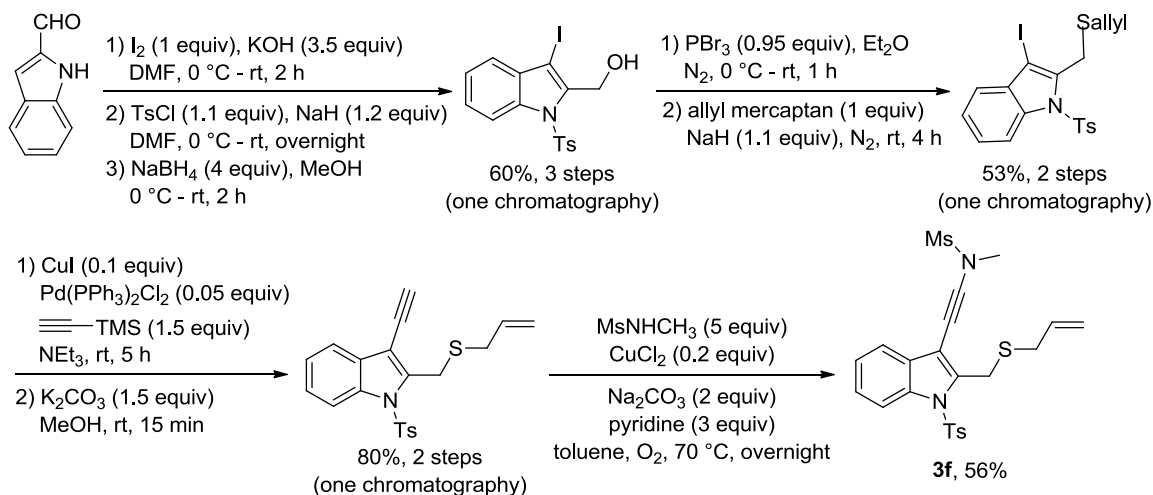

Compound **3f** was prepared according to the above known procedures.<sup>1-3</sup> <sup>1</sup>H NMR (500 MHz, CDCl<sub>3</sub>) δ 8.04 (d, *J* = 8.5 Hz, 1H), 7.79 (d, *J* = 8.5 Hz, 2H), 7.53 (dd, *J* = 8.0, 1.0 Hz, 1H), 7.34 – 7.23 (m, 2H), 7.18 (d, *J* = 8.1 Hz, 2H), 5.96 – 5.78 (m, 1H), 5.30 – 5.20 (m, 1H), 5.16 – 5.04 (m, 1H), 4.28 (s, 2H), 3.33 (s, 3H), 3.29 (d, *J* = 7.0 Hz, 2H), 3.15 (s, 3H), 2.31 (s, 3H); <sup>13</sup>C NMR (125 MHz, CDCl<sub>3</sub>) δ 145.1, 141.7, 135.8, 135.4, 134.2, 129.7, 129.4, 126.8, 125.4, 124.0, 119.7, 117.0, 114.7, 105.6, 89.6, 60.8, 39.2, 37.0, 35.3, 27.7, 21.4; IR (neat): 2930, 2250(s), 1365, 1127, 1090, 750, 590; HRESIMS Calcd for [C<sub>23</sub>H<sub>24</sub>N<sub>2</sub>NaO<sub>4</sub>S<sub>3</sub>]<sup>+</sup> (M + Na<sup>+</sup>) 511.0790, found 511.0796.

***N*-((2-(2-(allyloxy)ethyl)-1-tosyl-1*H*-indol-3-yl)ethynyl)-*N*-methylmethanesulfonamide (3g)**

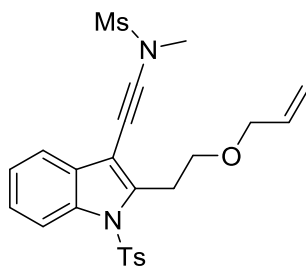

**3g**

Compound **3g** was prepared according to the general procedures for the synthesis of ynamides **1**.<sup>1-3</sup> Pale yellow oil. <sup>1</sup>H NMR (400 MHz, CDCl<sub>3</sub>) δ 8.15 (d, *J* = 6.8 Hz, 1H), 7.62 (d, *J* = 6.8 Hz, 2H), 7.53 (dd, *J* = 6.0, 0.4 Hz, 1H), 7.36 – 7.21 (m, 2H), 7.14 (d, *J* = 6.4 Hz, 2H), 5.96 – 5.80 (m, 1H), 5.32 – 5.22 (m, 1H), 5.14 (dd, *J* = 8.0, 1.2 Hz, 1H), 4.01 (dt, *J* = 4.4, 0.8 Hz, 2H), 3.81 (t, *J* = 5.6 Hz, 2H), 3.49 (t, *J* = 5.6 Hz, 2H), 3.29 (s, 3H), 3.12 (s, 3H), 2.27 (s, 3H); <sup>13</sup>C NMR (125 MHz, CDCl<sub>3</sub>) δ 145.1, 141.6, 136.0, 135.6, 134.8, 129.9(0), 129.8(6), 126.3, 125.1, 124.0, 119.5, 116.6, 114.8, 106.0, 89.0, 71.6, 69.4, 60.8, 39.3, 36.7, 28.8, 21.5; IR (neat): 2931, 2241(s), 1359, 1107, 1089, 748, 577; HRESIMS Calcd for [C<sub>24</sub>H<sub>26</sub>N<sub>2</sub>NaO<sub>5</sub>S<sub>2</sub>]<sup>+</sup> (M + Na<sup>+</sup>) 509.1175, found 509.1179.

***N*-((2-((allyloxy)methyl)phenyl)ethynyl)-*N*-methylmethanesulfonamide (3h)**

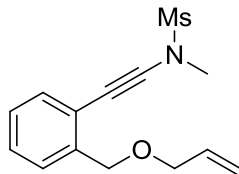

**3h**

Compound **3h** was prepared according to the general procedures for the synthesis of ynamides **1**.<sup>1-3</sup> Pale yellow oil. <sup>1</sup>H NMR (400 MHz, CDCl<sub>3</sub>) δ 7.45 (d, 1H, *J* = 7.6 Hz), 7.41 – 7.36 (m, 1H), 7.32 – 7.26 (m, 1H), 7.25 – 7.19 (m, 1H), 6.02 – 5.91 (m, 1H), 5.35 – 5.27 (m, 1H), 5.24 – 5.17 (m, 1H), 4.63 (s, 2H), 4.09 – 4.06 (m, 2H), 3.29 (s, 3H), 3.11 (s, 3H); <sup>13</sup>C NMR (100 MHz, CDCl<sub>3</sub>) δ 139.5, 134.7, 131.3, 127.9, 127.8, 127.2, 121.1, 116.9, 87.3, 71.3, 70.2, 67.4, 39.0, 36.7; IR (neat): 3016, 2931, 2856, 2235, 1360, 1163, 959, 779, 516; HRESIMS Calcd for [C<sub>14</sub>H<sub>17</sub>NNaO<sub>3</sub>S]<sup>+</sup> (M + Na<sup>+</sup>) 302.0821, found 302.0825.

**(S)-N-((2-((allyloxy)methyl)-1-tosyl-1*H*-indol-3-yl)ethynyl)-N-(1-phenylethyl)methanesulfonamide (5a)**

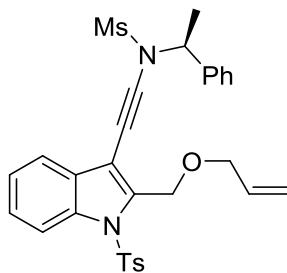

**5a**

Compound **5a** was prepared according to the general procedures for the synthesis of ynamides **1**.<sup>1-3</sup> Pale yellow oil. [ $\alpha$ ]<sub>D</sub><sup>20</sup> = -246.7° (c = 1.0, CHCl<sub>3</sub>). <sup>1</sup>H NMR (400 MHz, CDCl<sub>3</sub>) δ 8.14 (d, *J* = 8.4 Hz, 1H), 7.96 (d, *J* = 8.4 Hz, 2H), 7.56 – 7.47 (m, 3H), 7.44 – 7.33 (m, 4H), 7.33 – 7.25 (m, 1H), 7.19 (d, *J* = 8.0 Hz, 2H), 6.00 – 5.82 (m, 1H), 5.33 – 5.22 (m, 2H), 5.17 (dd, *J* = 10.8, 1.6 Hz, 1H), 5.00 (d, *J* = 0.8 Hz, 2H), 4.01 (dt, *J* = 5.6, 1.2 Hz, 2H), 2.81 (s, 3H), 2.34 (s, 3H), 1.80 (d, *J* = 7.2 Hz, 3H); <sup>13</sup>C NMR (125 MHz, CDCl<sub>3</sub>) δ 144.9, 139.6, 139.3, 135.9, 135.8, 134.6, 129.8, 129.3, 128.8, 128.7, 127.4, 127.0, 125.9, 123.8, 120.2, 117.0, 114.7, 107.8, 85.8, 71.2, 64.9, 62.8, 59.1, 39.1, 21.5,

19.9; IR (neat): 2925, 2854, 2239(s), 1451, 1361, 1166, 1094, 577; HRESIMS Calcd for  $[\text{C}_{30}\text{H}_{30}\text{N}_2\text{NaO}_5\text{S}_2]^+$  ( $\text{M} + \text{Na}^+$ ) 585.1488, found 585.1491.

**Representative synthetic procedures for the preparation of chiral ynamides 5b-5i:**<sup>3f</sup>

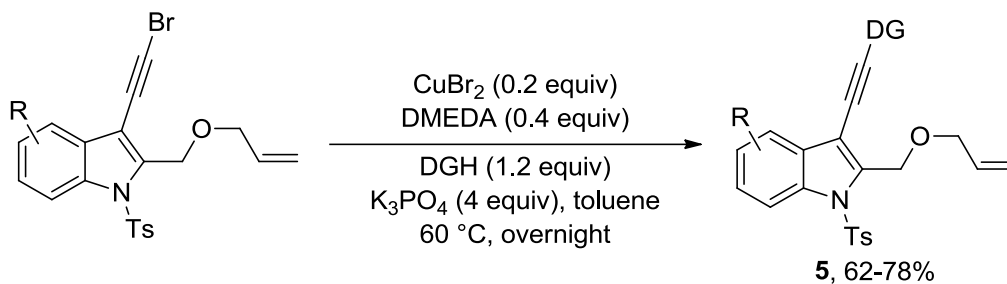

**(S)-3-((2-((allyloxy)methyl)-1-tosyl-1H-indol-3-yl)ethynyl)-4-phenyloxazolidin-2-one (5b)**

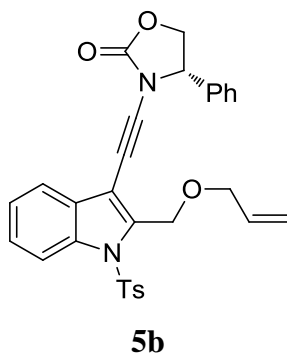

Pale yellow oil.  $[\alpha]_{\text{D}}^{20} = -41.5$  (c = 1.0,  $\text{CHCl}_3$ ).  $^1\text{H}$  NMR (400 MHz,  $\text{CDCl}_3$ )  $\delta$  8.06 (d,  $J = 8.4$  Hz, 1H), 7.89 (d,  $J = 8.4$  Hz, 2H), 7.58 – 7.37 (m, 5H), 7.36 – 7.22 (m, 2H), 7.21 – 7.08 (m, 3H), 5.93 – 5.66 (m, 1H), 5.33 – 5.07 (m, 3H), 4.94 – 4.70 (m, 3H), 4.34 (dd,  $J = 8.4, 7.6$  Hz, 1H), 3.80 (d,  $J = 5.6$  Hz, 2H), 2.31 (s, 3H);  $^{13}\text{C}$  NMR (125 MHz,  $\text{CDCl}_3$ )  $\delta$  155.2, 144.9, 139.1, 135.9, 135.8, 135.7, 134.6, 129.7, 129.5, 129.4, 128.9, 127.4, 127.0, 125.8, 123.7, 120.3, 116.9, 114.5, 107.3, 84.3, 70.9, 70.8, 64.0, 62.5, 62.3, 21.5; IR (neat): 2920, 2257(s), 1779(s), 1374, 1176, 1087, 575; HRESIMS Calcd for  $[\text{C}_{30}\text{H}_{26}\text{N}_2\text{NaO}_5\text{S}]^+$  ( $\text{M} + \text{Na}^+$ ) 549.1455, found 549.1458.

**(S)-3-((2-((allyloxy)methyl)-1-tosyl-1H-indol-3-yl)ethynyl)-4-benzhydryloxazolidin-2-one (5c)**



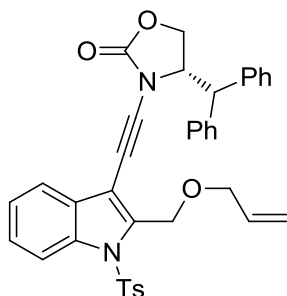

**5c**

Pale yellow solid (mp 140-141°C).  $[\alpha]_D^{20} = -30.5$  °(c = 1.0, CHCl<sub>3</sub>). <sup>1</sup>H NMR (400 MHz, CDCl<sub>3</sub>) δ 8.16 (d, *J* = 8.4 Hz, 1H), 7.97 (d, *J* = 8.4 Hz, 2H), 7.47 (d, *J* = 7.6 Hz, 1H), 7.42 – 7.22 (m, 11H), 7.18 (d, *J* = 8.4 Hz, 2H), 7.15 – 7.04 (m, 1H), 6.05 – 5.86 (m, 1H), 5.33 (d, *J* = 17.2 Hz, 1H), 5.21 (d, *J* = 10.4 Hz, 1H), 5.11 – 4.83 (m, 3H), 4.56 (d, *J* = 5.2 Hz, 2H), 4.35 – 4.21 (m, 1H), 4.05 (d, *J* = 5.2 Hz, 2H), 2.31 (s, 3H); <sup>13</sup>C NMR (100 MHz, CDCl<sub>3</sub>) δ 155.4, 144.8, 139.2, 139.1, 138.4, 135.6, 135.5, 134.4, 129.4, 128.9, 128.7, 128.3, 128.1, 127.5, 127.3, 127.2, 125.7, 123.5, 120.4, 116.9, 114.3, 107.4, 84.6, 70.9, 66.5, 64.5, 62.4, 59.8, 53.2, 21.3; IR (neat): 2961, 2923, 2250(s), 1787(s), 1731, 1210, 1170, 580; HRESIMS Calcd for [C<sub>37</sub>H<sub>32</sub>N<sub>2</sub>NaO<sub>5</sub>S]<sup>+</sup> (M + Na<sup>+</sup>) 639.1924, found 639.1925.

**(S)-3-((2-((allyloxy)methyl)-1-tosyl-1H-indol-3-yl)ethynyl)-4-(tert-butyl)oxazolidin-2-one (5d)**

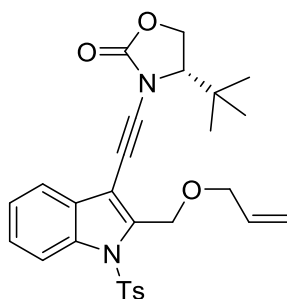

**5d**

Pale yellow solid (mp 135-136°C).  $[\alpha]_D^{20} = -20.7$  °(c = 1.0, CHCl<sub>3</sub>). <sup>1</sup>H NMR (400 MHz, CDCl<sub>3</sub>) δ 8.12 (d, *J* = 8.4 Hz, 1H), 7.94 (d, *J* = 8.4 Hz, 2H), 7.60 (d, *J* = 7.6 Hz, 1H), 7.42 – 7.32 (m, 1H), 7.31 – 7.23 (m, 1H), 7.17 (d, *J* = 8.4 Hz, 2H), 6.02 – 5.85 (m, 1H), 5.30 (dd, *J* = 17.2, 1.6 Hz, 1H), 5.19 (dd, *J* = 10.4, 1.2 Hz, 1H), 5.10 – 4.94 (m, 2H), 4.44 (t, *J* = 9.2 Hz, 1H), 4.27 (dd, *J* = 9.2, 5.2 Hz, 1H), 4.06 (d, *J* = 5.6 Hz, 2H), 3.88 (dd, *J* = 8.8, 5.2 Hz, 1H), 2.32 (s, 3H), 1.11 (s, 9H); <sup>13</sup>C NMR (100 MHz, CDCl<sub>3</sub>) δ 156.3, 144.9,

139.2, 135.8, 135.7, 134.6, 129.5, 129.1, 127.4, 125.9, 123.8, 120.3, 117.0, 114.6, 107.7, 86.6, 71.2, 66.2, 65.5, 63.3, 62.6, 34.9, 25.3, 21.5; IR (neat): 2967, 2256(s), 1773(s), 1371, 1187, 1137, 662, 584; HRESIMS Calcd for  $[C_{28}H_{30}N_2NaO_5S]^+$  ( $M + Na^+$ ) 529.1768, found 529.1771.

**(S)-3-((2-((allyloxy)methyl)-5-methyl-1-tosyl-1H-indol-3-yl)ethynyl)-4-(tert-butyl)oxazolidin-2-one (5e)**

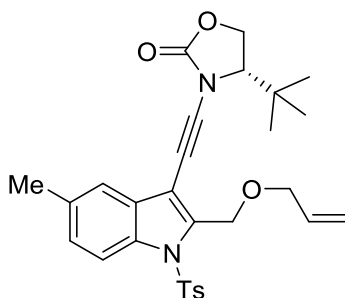

**5e**

Pale yellow solid (mp 142-143°C).  $[\alpha]_D^{20} = -10.5$  (c = 1.0,  $CHCl_3$ ).  $^1H$  NMR (400 MHz,  $CDCl_3$ )  $\delta$  7.98 (d,  $J = 8.4$  Hz, 1H), 7.91 (d,  $J = 8.4$  Hz, 2H), 7.37 (s, 1H), 7.16 (d,  $J = 8.4$  Hz, 3H), 6.00 – 5.83 (m, 1H), 5.29 (dd,  $J = 17.2, 1.6$  Hz, 1H), 5.18 (d,  $J = 10.4$  Hz, 1H), 5.00 (s, 2H), 4.44 (t,  $J = 9.2$  Hz, 1H), 4.28 (dd,  $J = 9.2, 5.2$  Hz, 1H), 4.05 (d,  $J = 5.6$  Hz, 2H), 3.88 (dd,  $J = 8.8, 5.2$  Hz, 1H), 2.41 (s, 3H), 2.32 (s, 3H), 1.11 (s, 9H);  $^{13}C$  NMR (100 MHz,  $CDCl_3$ )  $\delta$  156.3, 144.8, 139.3, 135.8, 134.6, 134.1, 133.5, 129.5, 129.3, 127.3, 120.1, 117.0, 114.3, 107.5, 86.5, 71.1, 66.3, 65.5, 63.4, 62.6, 34.9, 25.3, 21.5, 21.1; IR (neat): 2961, 2923, 2254(s), 1777(s), 1731, 1217, 1176, 580; HRESIMS Calcd for  $[C_{29}H_{32}N_2NaO_5S]^+$  ( $M + Na^+$ ) 543.1924, found 543.1926.

**(S)-3-((2-((allyloxy)methyl)-6-chloro-1-tosyl-1H-indol-3-yl)ethynyl)-4-(tert-butyl)oxazolidin-2-one (5f)**

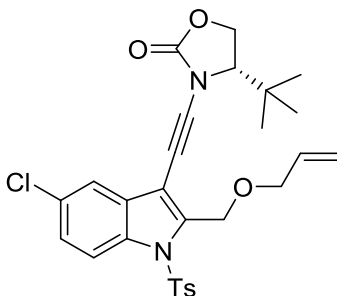

**5f**

Pale yellow solid (mp 150-151°C).  $[\alpha]_D^{20} = -30.5^\circ$  (c = 1.0, CHCl<sub>3</sub>). <sup>1</sup>H NMR (400 MHz, CDCl<sub>3</sub>) δ 8.14 (d, *J* = 1.6 Hz, 1H), 7.92 (d, *J* = 8.4 Hz, 2H), 7.50 (d, *J* = 8.4 Hz, 1H), 7.24 (dd, *J* = 8.4, 1.6 Hz, 1H), 7.20 (d, *J* = 8.4 Hz, 2H), 5.98 – 5.84 (m, 1H), 5.29 (dd, *J* = 17.6, 1.6 Hz, 1H), 5.19 (d, *J* = 10.4 Hz, 1H), 4.98 (d, *J* = 1.6 Hz, 2H), 4.44 (t, *J* = 8.8 Hz, 1H), 4.27 (dd, *J* = 9.2, 5.2 Hz, 1H), 4.04 (d, *J* = 5.6 Hz, 2H), 3.88 (dd, *J* = 8.8, 5.2 Hz, 1H), 2.34 (s, 3H), 1.10 (s, 9H); <sup>13</sup>C NMR (100 MHz, CDCl<sub>3</sub>) δ 156.2, 145.2, 140.5, 135.4, 134.4, 134.1, 130.3, 129.7, 129.6, 127.3, 126.1, 119.9, 117.2, 115.8, 107.0, 87.0, 71.3, 66.2, 65.6, 62.6, 62.5, 34.9, 25.3, 21.5; IR (neat): 2967, 2261(s), 1174(s), 1371, 1179, 1137, 1071, 663, 585; HRESIMS Calcd for [C<sub>28</sub>H<sub>29</sub>ClN<sub>2</sub>NaO<sub>5</sub>S]<sup>+</sup> (M + Na<sup>+</sup>) 563.1378, found 563.1375.

**(*S*)-3-((2-((allyloxy)methyl)-5-bromo-1-tosyl-1*H*-indol-3-yl)ethynyl)-4-(*tert*-butyl)oxazolidin-2-one (5g)**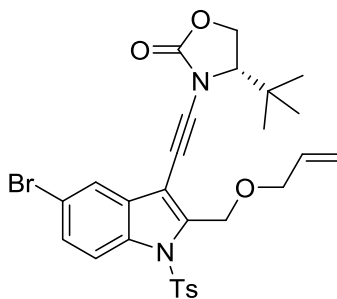**5g**

Pale yellow solid (mp 170-171°C).  $[\alpha]_D^{20} = -10.5^\circ$  (c = 1.0, CHCl<sub>3</sub>). <sup>1</sup>H NMR (400 MHz, CDCl<sub>3</sub>) δ 7.98 (d, *J* = 8.8 Hz, 1H), 7.90 (d, *J* = 8.0 Hz, 2H), 7.69 (s, 1H), 7.42 (d, *J* = 8.8 Hz, 1H), 7.16 (d, *J* = 8.4 Hz, 2H), 5.98 – 5.83 (m, 1H), 5.29 (d, *J* = 17.2 Hz, 1H), 5.18 (d, *J* = 10.4 Hz, 1H), 4.98 (s, 2H), 4.43 (t, *J* = 9.2 Hz, 1H), 4.26 (dd, *J* = 9.2, 5.2 Hz, 1H), 4.05 (d, *J* = 5.6 Hz, 2H), 3.88 (dd, *J* = 8.8, 5.2 Hz, 1H), 2.29 (s, 3H), 1.08 (s, 9H); <sup>13</sup>C NMR (100 MHz, CDCl<sub>3</sub>) δ 156.2, 145.2, 140.2, 135.2, 134.4, 134.3, 130.7, 129.5, 128.6, 127.2, 122.9, 117.2, 117.1, 116.0, 106.8, 87.0, 71.2, 66.1, 65.5, 62.4, 62.3, 34.8, 25.2, 21.4; IR (neat): 2963, 2257(s), 1771(s), 1445, 1372, 1247, 1178, 581; HRESIMS Calcd for [C<sub>28</sub>H<sub>29</sub>BrN<sub>2</sub>NaO<sub>5</sub>S]<sup>+</sup> (M + Na<sup>+</sup>) 607.0873, found 607.0879.

**methyl (S)-2-((allyloxy)methyl)-3-((4-(tert-butyl)-2-oxooxazolidin-3-yl)ethynyl)-1-tosyl-1H-indole-5-carboxylate (5h)**

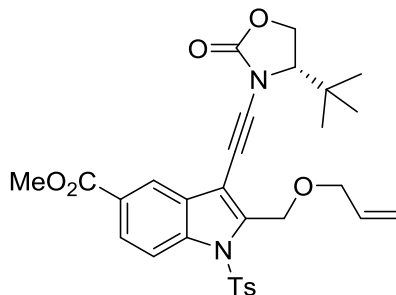

**5h**

Pale yellow solid (mp 150-151°C).  $[\alpha]_D^{20} = -31.5^\circ$  (c = 1.0, CHCl<sub>3</sub>). <sup>1</sup>H NMR (400 MHz, CDCl<sub>3</sub>) δ 8.27 (d, *J* = 1.2 Hz, 1H), 8.14 (d, *J* = 8.8 Hz, 1H), 8.01 (dd, *J* = 8.8, 1.6 Hz, 1H), 7.92 (d, *J* = 8.4 Hz, 2H), 7.17 (d, *J* = 8.4 Hz, 2H), 5.99 – 5.80 (m, 1H), 5.29 (ddd, *J* = 17.2, 3.2, 1.6 Hz, 1H), 5.18 (dd, *J* = 10.4, 1.6 Hz, 1H), 5.08 – 4.93 (m, 2H), 4.45 (t, *J* = 9.0 Hz, 1H), 4.27 (dd, *J* = 9.2, 5.2 Hz, 1H), 4.05 (d, *J* = 5.6 Hz, 2H), 3.95 – 3.83 (m, 4H), 2.30 (s, 3H), 1.10 (s, 9H); δ<sup>13</sup>C NMR (100 MHz, CDCl<sub>3</sub>) δ 166.8, 156.2, 145.3, 140.6, 138.2, 135.2, 134.3, 129.6, 128.9, 127.4, 126.8, 125.8, 122.5, 117.2, 114.3, 107.9, 87.1, 71.3, 66.2, 65.6, 62.5, 62.4, 52.1, 34.9, 25.2, 21.4; IR (neat): 2951, 2933, 2255(s), 1790(s), 1780(s), 1731, 1218, 1175, 580; HRESIMS Calcd for [C<sub>30</sub>H<sub>32</sub>N<sub>2</sub>NaO<sub>7</sub>S]<sup>+</sup> (M + Na<sup>+</sup>) 587.1822, found 587.1829.

**(S)-3-((2-((allyloxy)methyl)-6-methyl-1-tosyl-1H-indol-3-yl)ethynyl)-4-(tert-butyl)oxazolidin-2-one (5i)**

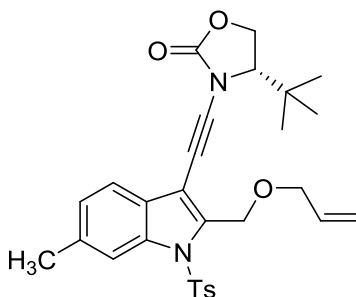

**5i**

Pale yellow solid (mp 130-131°C).  $[\alpha]_D^{20} = -22.7^\circ$  (c = 1.0, CHCl<sub>3</sub>). <sup>1</sup>H NMR (400 MHz, CDCl<sub>3</sub>) δ 7.97 – 7.77 (m, 3H), 7.46 (d, *J* = 8.0 Hz, 1H), 7.18 (d, *J* = 8.4 Hz, 2H), 7.09 (d, *J* = 8.0 Hz, 1H), 6.01 – 5.81 (m, 1H), 5.29 (dd, *J* = 17.2, 1.6 Hz, 1H), 5.17 (dd, *J* = 10.4,

1.2 Hz, 1H), 5.08 – 4.88 (m, 2H), 4.43 (t,  $J = 9.2$  Hz, 1H), 4.27 (dd,  $J = 9.2, 5.2$  Hz, 1H), 4.04 (d,  $J = 5.6$  Hz, 2H), 3.87 (dd,  $J = 8.8, 5.2$  Hz, 1H), 2.48 (s, 3H), 2.32 (s, 3H), 1.11 (s, 9H);  $^{13}\text{C}$  NMR (100 MHz,  $\text{CDCl}_3$ )  $\delta$  156.3, 144.8, 138.6, 136.2, 136.1, 135.8, 134.6, 129.5, 127.3, 126.8, 125.3, 119.9, 117.0, 114.7, 107.6, 86.5, 71.1, 66.2, 65.5, 63.4, 62.7, 34.9, 25.3, 22.1, 21.5; IR (neat): 2968, 2256(s), 1174(s), 1371, 1177, 662, 585; HRESIMS Calcd for  $[\text{C}_{29}\text{H}_{32}\text{N}_2\text{NaO}_5\text{S}]^+$  ( $\text{M} + \text{Na}^+$ ) 543.1924, found 543.1925.

***N*-((2-(((allyl-1,1- $d_2$ )oxy)methyl)-1-tosyl-1*H*-indol-3-yl)ethynyl)-*N*-methylmethanesulfonamide (1a')**

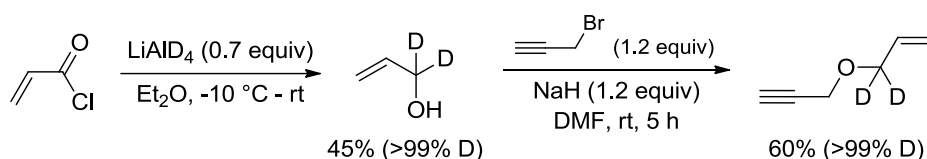

1,1-dideuterioallyl alcohol:<sup>3b</sup>

Under an argon atmosphere,  $\text{LiAlD}_4$  (0.52 g, 12.5 mmol) and anhydrous ether (20 mL) were added into a 50 mL flame-dried flask fitted with magnetic stirrer bar at  $-10$  °C. Then, a solution of acryloyl chloride (1.5 mL, 17.8 mmol) in ether was added dropwise over 10 min. The resulting mixture was warmed to rt slowly and stirred for 10 h. The mixture was cooled to  $-10$  °C and  $\text{H}_2\text{O}$  (1.0 mL) was slowly added over a 5 min. period. After stirring for another 15 min, 15% aqueous  $\text{NaOH}$  solution (1.0 mL) and then  $\text{H}_2\text{O}$  (1.0 mL) were added. The resulting slurry was stirred for 1 h and then filtered. The filtrate was dried over  $\text{Na}_2\text{SO}_4$ . The solvent was removed carefully on a rotary evaporator (atmospheric pressure,  $37$  °C) to afford a colorless liquid, which was used in the next step without further purification.

propargyl 1,1-dideuterioallyl ether:

$\text{NaH}$  (18 mmol, 0.43 g) was added to a mixture of the 1,1-dideuterioallyl alcohol (15 mmol, 0.90 g) and DMF (15 mL) at rt. After stirring at rt for 1 h, propargyl bromide (18 mmol, 2.15 g) was added. The reaction mixture was stirred for another 5 h at rt then quenched with a saturated aqueous solution of  $\text{NH}_4\text{Cl}$  (30 mL). The resulting solution was extracted with  $\text{EtOAc}$  (2\*30 mL) and washed with brine (2\*30 mL). The combined organic layers were dried over anhydrous  $\text{MgSO}_4$  and concentrated under reduced pressure, and the residue was purified by chromatography on silica gel (eluent:

hexanes/ethyl acetate) to afford the desired propargyl 1,1-dideuterioallyl ether in 60% yield (0.88 g).

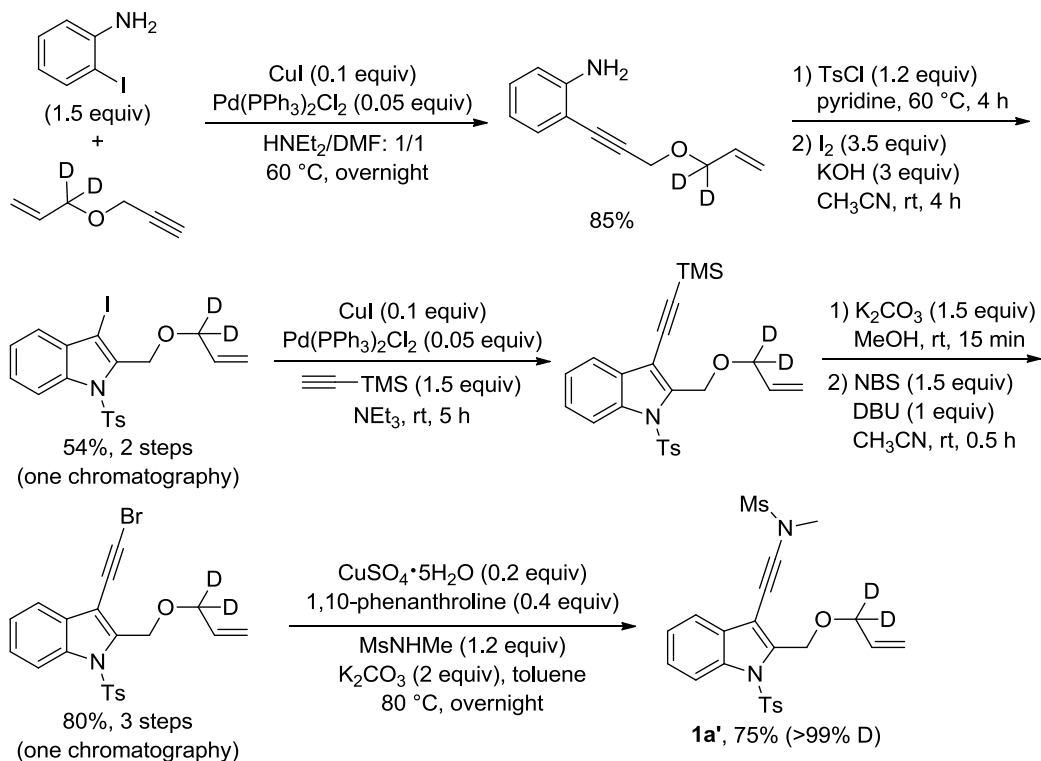

Compound **1a'** was prepared according to the above known procedures.<sup>1-3</sup> Pale yellow oil.  $^1\text{H}$  NMR (400 MHz,  $\text{CDCl}_3$ )  $\delta$  8.12 (d,  $J = 8.4$  Hz, 1H), 7.93 (d,  $J = 8.4$  Hz, 2H), 7.58 (d,  $J = 7.6$  Hz, 1H), 7.44 – 7.32 (m, 1H), 7.31 – 7.24 (m, 1H), 7.18 (d,  $J = 8.0$  Hz, 2H), 5.93 (dd,  $J = 17.2, 10.4$  Hz, 1H), 5.31 (dd,  $J = 17.2, 1.6$  Hz, 1H), 5.21 (dd,  $J = 10.4, 1.6$  Hz, 1H), 5.01 (s, 2H), 3.33 (s, 3H), 3.14 (s, 3H), 2.33 (s, 3H); IR (neat): 2927, 2240(s), 1450, 1358(s), 1176, 1109, 997, 764; HRESIMS Calcd for  $[\text{C}_{23}\text{H}_{22}\text{D}_2\text{N}_2\text{NaO}_5\text{S}_2]^+$  ( $\text{M} + \text{Na}^+$ ) 497.1144, found 497.1152.

*N*-((2-(((allyl-2-*d*oxy)methyl)-1-tosyl-1*H*-indol-3-yl)ethynyl)-*N*-methylmethanesulfonamide (**1a''**)

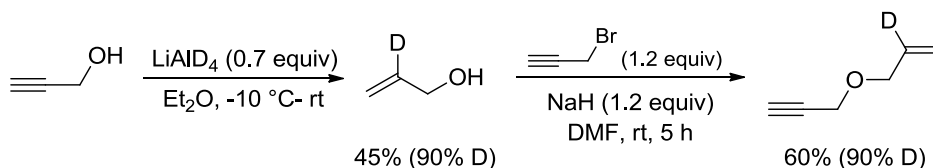

2-deuterioallyl alcohol:<sup>3d</sup>

Under an argon atmosphere,  $\text{LiAlD}_4$  (0.52 g, 12.5 mmol) and anhydrous ether (20 mL) were added into a 50 mL flame-dried flask fitted with magnetic stirrer bar at  $-10^\circ\text{C}$ . Then,

a solution of allyl alcohol (1.0 g, 17.8 mmol) in ether was added dropwise over 10 min, The resulting mixture was warmed to rt slowly and stirred for 24 h. The mixture was cooled to -10 °C and H<sub>2</sub>O (1.0 mL) was slowly added over a 5 min. period. After stirring for another 15 min, 15% aqueous NaOH solution (1.0 mL) and then H<sub>2</sub>O (1.0 mL) were added. The resulting slurry was stirred for 1 h and then filtered. The filtrate was dried over Na<sub>2</sub>SO<sub>4</sub>. The solvent was removed carefully on a rotary evaporator (atmospheric pressure, 37 °C) to afford a colorless liquid, which was used in the next step without further purification.

propargyl 2-deuterioallyl ether:

NaH (18 mmol, 0.43 g) was added to a mixture of the 2-deuterioallyl alcohol (15 mmol, 0.89 g) and DMF (15 mL) at rt. After stirring at rt for 1 h, propargyl bromide (18 mmol, 2.15 g) was added. The reaction mixture was stirred for another 5 h at rt then quenched with a saturated aqueous solution of NH<sub>4</sub>Cl (30 mL). The resulting solution was extracted with EtOAc (2\*30 mL) and washed with brine (2\*30 mL). The combined organic layers were dried over anhydrous MgSO<sub>4</sub> and concentrated under reduced pressure, and the residue was purified by chromatography on silica gel (eluent: hexanes/ethyl acetate) to afford the desired propargyl 2-deuterioallyl ether in 60% yield (0.87 g).

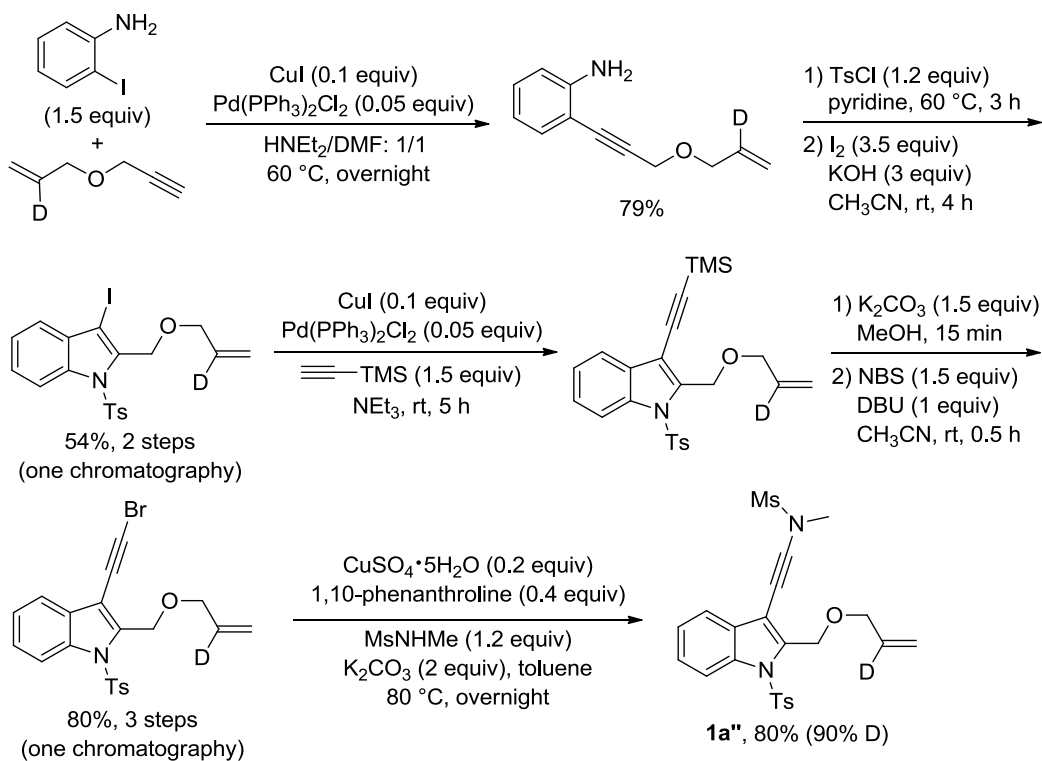

Compound **1a''** was prepared according to the above known procedures.<sup>1-3</sup> Pale yellow oil. <sup>1</sup>H NMR (400 MHz, CDCl<sub>3</sub>) δ 8.13 (d, *J* = 8.4 Hz, 1H), 7.94 (d, *J* = 8.0 Hz, 2H), 7.59 (d, *J* = 7.6 Hz, 1H), 7.41 – 7.33 (m, 1H), 7.32 – 7.23 (m, 1H), 7.17 (d, *J* = 8.4 Hz, 2H), 6.00 – 5.87 (m, 0.1H), 5.31 (d, *J* = 1.6 Hz, 1H), 5.21 (s, 1H), 5.02 (s, 2H), 4.06 (s, 2H), 3.33 (s, 3H), 3.13 (s, 3H), 2.31 (s, 3H); IR (neat): 2920, 2230(s), 1359(s), 1275, 1260, 1176, 764, 749; HRESIMS Calcd for [C<sub>23</sub>H<sub>23</sub>DN<sub>2</sub>O<sub>5</sub>S<sub>2</sub>]<sup>+</sup> (M + Na<sup>+</sup>) 496.1082, found 496.1079.

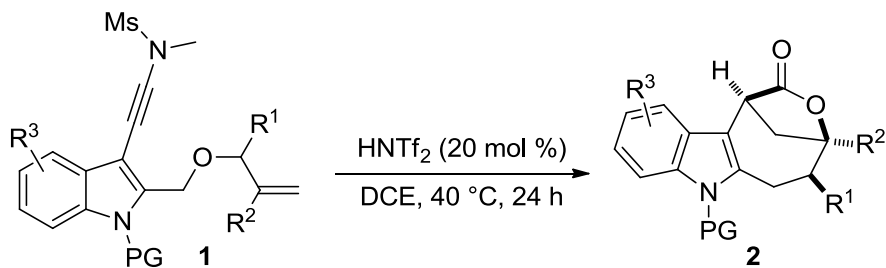

#### General procedure for the synthesis of indole-fused bridged [4.2.1] lactones **2**:

HNTf<sub>2</sub> (0.04 mmol, 11.2 mg) was added to a mixture of the ynamide **1** (0.20 mmol) and DCE (4.0 mL) at room temperature. Then, the reaction mixture was stirred at 40 °C and the progress of the reaction was monitored by TLC. The reaction typically took 24 h. Upon completion, the mixture was concentrated and the residue was purified by chromatography on silica gel (eluent: hexanes/ethyl acetate) to afford the desired indole-fused bridged [4.2.1] lactone **2**.

#### 7-tosyl-4,5,6,7-tetrahydro-1,4-methanooxocino[5,4-*b*]indol-2(1*H*)-one (**2a**)

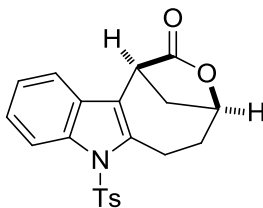

**2a**

Compound **2a** was prepared in 77% yield (58.7 mg) according to the general procedure (Table 2, entry 1). Pale yellow solid (mp 190-191 °C). <sup>1</sup>H NMR (400 MHz, CDCl<sub>3</sub>) δ



8.23 (d,  $J = 8.0$  Hz, 1H), 7.54 (d,  $J = 8.4$  Hz, 2H), 7.49 – 7.39 (m, 1H), 7.40 – 7.23 (m, 2H), 7.17 (d,  $J = 8.4$  Hz, 2H), 5.09 (t,  $J = 7.2$  Hz, 1H), 3.94 (dt,  $J = 17.2, 4.4$  Hz, 1H), 3.84 (d,  $J = 8.0$  Hz, 1H), 2.96 – 2.80 (m, 1H), 2.76 – 2.61 (m, 1H), 2.47 – 2.34 (m, 1H), 2.31 (s, 3H), 1.87 (d,  $J = 12.4$  Hz, 1H), 1.84 – 1.75 (m, 1H);  $^{13}\text{C}$  NMR (125 MHz,  $\text{CDCl}_3$ )  $\delta$  175.5, 145.1, 136.7, 136.3, 135.8, 129.9, 128.5, 126.2, 124.9, 123.9, 121.4, 117.7, 115.4, 78.4, 37.0 35.9, 31.8, 21.6, 19.8; IR (neat): 2927, 1763(s), 1451, 1376, 1358, 1166, 1148, 974, 763; HRESIMS Calcd for  $[\text{C}_{21}\text{H}_{19}\text{NNaO}_4\text{S}]^+$  ( $\text{M} + \text{Na}^+$ ) 404.0927, found 404.0927.

#### 4-allyl-9-tosyl-4,9-dihydropyrano[3,4-*b*]indol-3(1*H*)-one (2aa)

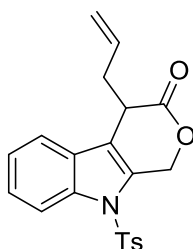

**2aa**

$^1\text{H}$  NMR (400 MHz,  $\text{CDCl}_3$ )  $\delta$  8.11 (d,  $J = 8.0$  Hz, 1H), 7.64 (d,  $J = 8.4$  Hz, 2H), 7.47 – 7.34 (m, 2H), 7.33 – 7.17 (m, 3H), 5.85 – 5.64 (m, 2H), 5.55 – 5.41 (m, 1H), 4.96 – 4.81 (m, 2H), 4.08 – 3.96 (m, 1H), 2.93 – 2.80 (m, 1H), 2.75 – 2.63 (m, 1H), 2.35 (s, 3H);  $^{13}\text{C}$  NMR (125 MHz,  $\text{CDCl}_3$ )  $\delta$  169.9, 145.6, 137.0, 134.7, 132.2, 130.1, 127.9, 127.3, 126.4, 125.5, 124.1, 119.5, 118.9, 116.3, 114.5, 67.0, 39.2, 36.7, 21.6; IR (neat): 2994, 1769(s), 1758, 1382, 1245, 1057, 913, 747; HRESIMS Calcd for  $[\text{C}_{21}\text{H}_{19}\text{NNaO}_4\text{S}]^+$  ( $\text{M} + \text{Na}^+$ ) 404.0927, found 404.0927.

#### 10-methyl-7-tosyl-4,5,6,7-tetrahydro-1,4-methanooxocino[5,4-*b*]indol-2(1*H*)-one (2b)

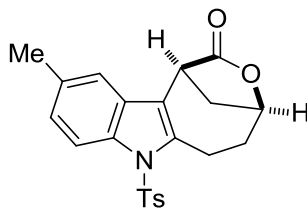

**2b**

Compound **2b** was prepared in 65% yield (51.4 mg) according to the general procedure (Table 2, entry 2). Pale yellow solid (mp 195-196 °C).  $^1\text{H}$  NMR (400 MHz,  $\text{CDCl}_3$ )  $\delta$

8.10 (d,  $J = 8.4$  Hz, 1H), 7.57 – 7.48 (m, 2H), 7.24 (s, 1H), 7.17 (d,  $J = 8.0$  Hz, 2H), 7.13 (dd,  $J = 8.4, 1.2$  Hz, 1H), 5.09 (t,  $J = 7.2$  Hz, 1H), 3.93 (dt,  $J = 17.2, 4.4$  Hz, 1H), 3.82 (d,  $J = 8.0$  Hz, 1H), 2.90 – 2.80 (m, 1H), 2.78 – 2.63 (m, 1H), 2.42 (s, 3H), 2.41 – 2.36 (m, 1H), 2.33 (s, 3H), 1.87 (d,  $J = 12.4$  Hz, 1H), 1.85 – 1.77 (m, 1H);  $^{13}\text{C}$  NMR (100 MHz,  $\text{CDCl}_3$ )  $\delta$  175.5, 144.9, 136.8, 135.8, 134.6, 133.6, 129.9, 128.8, 126.2, 126.1, 121.4, 117.7, 115.2, 78.4, 36.9, 35.9, 31.8, 21.5, 21.2, 19.9; IR (neat): 2923, 2854, 1768(s), 1461, 1357, 1177, 1152, 1043, 744; HRESIMS Calcd for  $[\text{C}_{22}\text{H}_{21}\text{NNaO}_4\text{S}]^+$  ( $\text{M} + \text{Na}^+$ ) 418.1083, found 418.1080.

**10-methoxy-7-tosyl-4,5,6,7-tetrahydro-1,4-methanooxocino[5,4-*b*]indol-2(1*H*)-one (2c)**

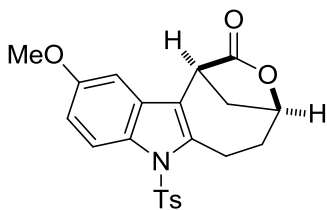

**2c**

Compound **2c** was prepared in 66% yield (54.3 mg) according to the general procedure (Table 2, entry 3). Pale yellow solid (mp 200-201 °C).  $^1\text{H}$  NMR (400 MHz,  $\text{CDCl}_3$ )  $\delta$  8.11 (d,  $J = 9.2$  Hz, 1H), 7.54 – 7.47 (m, 2H), 7.17 (d,  $J = 8.4$  Hz, 2H), 6.92 (dd,  $J = 8.8, 2.4$  Hz, 1H), 6.87 (d,  $J = 2.4$  Hz, 1H), 5.10 (t,  $J = 7.2$  Hz, 1H), 3.92 (dt,  $J = 17.2, 4.4$  Hz, 1H), 3.83 (s, 3H), 3.78 (d,  $J = 8.0$  Hz, 1H), 2.93 – 2.77 (m, 1H), 2.76 – 2.65 (m, 1H), 2.47 – 2.35 (m, 1H), 2.33 (s, 3H), 1.87 (d,  $J = 12.0$  Hz, 1H), 1.85 – 1.77 (m, 1H);  $^{13}\text{C}$  NMR (100 MHz,  $\text{CDCl}_3$ )  $\delta$  175.5, 156.9, 145.0, 137.5, 135.6, 130.9, 129.8, 129.6, 126.1, 121.7, 116.5, 113.6, 100.4, 78.4, 55.6, 36.9, 36.0, 31.7, 21.5, 19.9; IR (neat): 2923, 2852, 1773(s), 1475, 1458, 1356, 1150, 1087, 1042, 763, 748; HRESIMS Calcd for  $[\text{C}_{22}\text{H}_{21}\text{NNaO}_5\text{S}]^+$  ( $\text{M} + \text{Na}^+$ ) 434.1033, found 434.1034.

**10-fluoro-7-tosyl-4,5,6,7-tetrahydro-1,4-methanooxocino[5,4-*b*]indol-2(1*H*)-one (2d)**

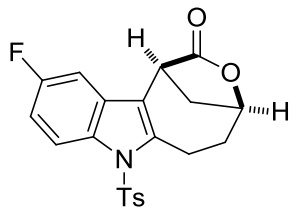

**2d**

Compound **2d** was prepared in 73% yield (58.3 mg) according to the general procedure (Table 2, entry 4). Pale yellow solid (mp 188-189 °C). <sup>1</sup>H NMR (400 MHz, CDCl<sub>3</sub>) δ 8.26 – 8.13 (m, 1H), 7.53 (d, *J* = 8.4 Hz, 2H), 7.20 (d, *J* = 8.4 Hz, 2H), 7.11 (dd, *J* = 8.8, 2.8 Hz, 1H), 7.08 – 6.95 (m, 1H), 5.11 (t, *J* = 7.2 Hz, 1H), 3.93 (dt, *J* = 17.2, 4.0 Hz, 1H), 3.74 (d, *J* = 8.0 Hz, 1H), 2.99 – 2.79 (m, 1H), 2.77 – 2.63 (m, 1H), 2.48 – 2.37 (m, 1H), 2.35 (s, 3H), 1.89 (d, *J* = 12.4 Hz, 1H), 1.86 – 1.79 (m, 1H); <sup>13</sup>C NMR (125 MHz, CDCl<sub>3</sub>) δ 175.2, 160.0 (d, *J* = 241.7 Hz), 145.4, 138.5, 135.5, 132.5, 130.0, 129.7 (d, *J* = 9.6 Hz), 126.1, 121.2 (d, *J* = 3.9 Hz), 116.7 (d, *J* = 9.1 Hz), 112.7 (d, *J* = 25.0 Hz), 103.5 (d, *J* = 24.4 Hz), 78.4, 36.8, 36.0, 31.6, 21.6, 20.0; IR (neat): 2922, 1773(s), 1458, 1376, 1358, 1265, 1176, 1150, 704; HRESIMS Calcd for [C<sub>21</sub>H<sub>18</sub>FNNaO<sub>4</sub>S]<sup>+</sup> (M + Na<sup>+</sup>) 422.0833, found 422.0836.

**10-chloro-7-tosyl-4,5,6,7-tetrahydro-1,4-methanooxocino[5,4-*b*]indol-2(1H)-one (2e)**

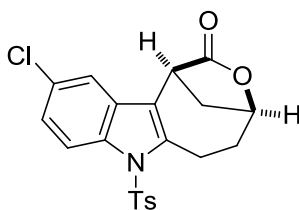

**2e**

Compound **2e** was prepared in 66% yield (54.7 mg) according to the general procedure (Table 2, entry 5). Pale yellow solid (mp 184-185 °C). <sup>1</sup>H NMR (400 MHz, CDCl<sub>3</sub>) δ 8.16 (d, *J* = 8.8 Hz, 1H), 7.54 (d, *J* = 8.4 Hz, 2H), 7.44 (d, *J* = 2.0 Hz, 1H), 7.31 – 7.14 (m, 3H), 5.11 (t, *J* = 7.2 Hz, 1H), 3.93 (dt, *J* = 17.2, 4.4 Hz, 1H), 3.77 (d, *J* = 8.0 Hz, 1H), 2.92 – 2.78 (m, 1H), 2.77 – 2.67 (m, 1H), 2.46 – 2.36 (m, 1H), 2.35 (s, 3H), 1.88 (d, *J* = 12.4 Hz, 1H), 1.85 – 1.77 (m, 1H); <sup>13</sup>C NMR (100 MHz, CDCl<sub>3</sub>) δ 175.1, 145.4, 138.3, 135.6, 134.6, 130.1, 129.8(0), 129.7(5), 126.2, 125.0, 120.7, 117.5, 116.5, 78.3, 36.8,

35.9, 31.6, 21.6, 19.9; IR (neat): 2923, 2852, 1769(s), 1450, 1377, 1355, 1159, 1043, 587; HRESIMS Calcd for  $[C_{21}H_{18}ClNNaO_4S]^+$  ( $M + Na^+$ ) 438.0537, found 438.0539.

**10-bromo-7-tosyl-4,5,6,7-tetrahydro-1,4-methanooxocino[5,4-*b*]indol-2(1*H*)-one (2f)**

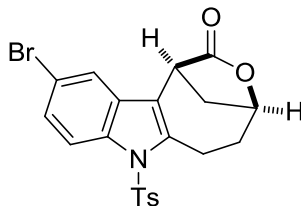

**2f**

Compound **2f** was prepared in 70% yield (67.5 mg) according to the general procedure (Table 2, entry 6). Pale yellow solid (mp 245-246 °C).  $^1H$  NMR (400 MHz,  $CDCl_3$ )  $\delta$  8.11 (d,  $J = 8.8$  Hz, 1H), 7.60 (d,  $J = 1.6$  Hz, 1H), 7.54 (d,  $J = 8.4$  Hz, 2H), 7.41 (dd,  $J = 8.8, 2.0$  Hz, 1H), 7.21 (d,  $J = 8.0$  Hz, 2H), 5.11 (t,  $J = 7.2$  Hz, 1H), 3.93 (dt,  $J = 17.2, 4.4$  Hz, 1H), 3.77 (d,  $J = 8.0$  Hz, 1H), 2.92 – 2.77 (m, 1H), 2.76 – 2.66 (m, 1H), 2.46 – 2.37 (m, 1H), 2.35 (s, 3H), 1.87 (d,  $J = 12.4$  Hz, 1H), 1.85 – 1.74 (m, 1H);  $^{13}C$  NMR (100 MHz,  $CDCl_3$ )  $\delta$  175.1, 145.5, 138.1, 135.6, 135.0, 130.2, 130.1, 127.7, 126.2, 120.6, 120.5, 117.4, 116.8, 78.3, 36.9, 35.9, 31.6, 21.6, 19.9; IR (neat): 2292, 2850, 1768(s), 1450, 1375, 1355, 1157, 1088, 663, 584; HRESIMS Calcd for  $[C_{21}H_{18}BrNNaO_4S]^+$  ( $M + Na^+$ ) 482.0032, found 482.0039.

**7-tosyl-10-(trifluoromethyl)-4,5,6,7-tetrahydro-1,4-methanooxocino[5,4-*b*]indol-2(1*H*)-one (2g)**

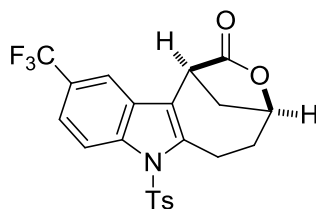

**2g**

Compound **2g** was prepared in 78% yield (70.0 mg) according to the general procedure (Table 2, entry 7). Pale yellow solid (mp 190-191 °C).  $^1H$  NMR (400 MHz,  $CDCl_3$ )  $\delta$  8.36 (d,  $J = 8.8$  Hz, 1H), 7.76 (s, 1H), 7.63 – 7.52 (m, 3H), 7.30 – 7.19 (m, 2H), 5.13 (t,  $J = 7.2$  Hz, 1H), 3.96 (dt,  $J = 17.2, 4.4$  Hz, 1H), 3.88 (d,  $J = 7.6$  Hz, 1H), 2.94 – 2.82 (m,

1H), 2.81 – 2.68 (m, 1H), 2.50 – 2.39 (m, 1H), 2.36 (s, 3H), 1.91 (d,  $J = 12.4$  Hz, 1H), 1.89 – 1.78 (m, 1H);  $^{13}\text{C}$  NMR (212.5 MHz,  $\text{CDCl}_3$ )  $\delta$  175.1, 145.7, 138.6, 137.7, 135.5, 130.2, 128.1, 126.3 (q,  $J = 31.6$  Hz), 126.2, 124.4 (q,  $J = 270.3$  Hz), 121.5 (q,  $J = 3.2$  Hz), 120.9, 115.6, 115.3 (q,  $J = 3.9$  Hz), 78.4, 36.9, 35.8, 31.5, 21.6, 19.8; IR (neat): 2922, 2850, 1770(s), 1379, 1325, 1168, 1122, 579; HRESIMS Calcd for  $[\text{C}_{22}\text{H}_{18}\text{F}_3\text{NNaO}_4\text{S}]^+$  ( $\text{M} + \text{Na}^+$ ) 472.0801, found 472.0799.

**2-oxo-7-tosyl-1,2,4,5,6,7-hexahydro-1,4-methanooxocino[5,4-*b*]indole-10-carbonitrile (2h)**

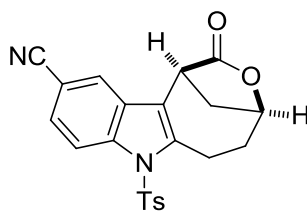

**2h**

Compound **2h** was prepared in 60% yield (48.7 mg) according to the general procedure (Table 2, entry 8). Pale yellow solid (mp 225-226 °C).  $^1\text{H}$  NMR (400 MHz,  $\text{CDCl}_3$ )  $\delta$  8.35 (dd,  $J = 8.8, 0.8$  Hz, 1H), 7.82 (d,  $J = 1.2$  Hz, 1H), 7.62 – 7.53 (m, 3H), 7.25 (d,  $J = 8.0$  Hz, 2H), 5.13 (t,  $J = 7.2$  Hz, 1H), 3.93 (dt,  $J = 17.2, 4.4$  Hz, 1H), 3.83 (d,  $J = 7.6$  Hz, 1H), 2.92 – 2.70 (m, 2H), 2.48 – 2.38 (m, 1H), 2.37 (s, 3H), 1.92 (d,  $J = 12.4$  Hz, 1H), 1.91 – 1.80 (m, 1H);  $^{13}\text{C}$  NMR (100 MHz,  $\text{CDCl}_3$ )  $\delta$  174.8, 146.0, 139.2, 137.9, 135.4, 130.3, 128.4, 127.7, 126.3, 122.6, 120.4, 119.0, 116.1, 107.4, 78.3, 36.7, 35.8, 31.5, 21.6, 19.9; IR (neat): 2924, 2226(s), 1769(s), 1459, 1380, 1357, 1173, 1153, 1087, 956, 668; HRESIMS Calcd for  $[\text{C}_{22}\text{H}_{18}\text{N}_2\text{NaO}_4\text{S}]^+$  ( $\text{M} + \text{Na}^+$ ) 429.0879, found 429.0884.

**methyl 2-oxo-7-tosyl-1,2,4,5,6,7-hexahydro-1,4-methanooxocino[5,4-*b*]indole-10-carboxylate (2i)**

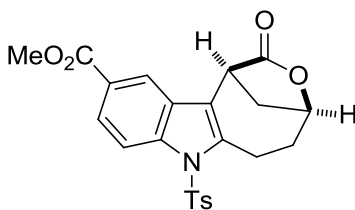

**2i**

Compound **2i** was prepared in 79% yield (69.4 mg) according to the general procedure (Table 2, entry 9). Pale yellow solid (mp 191-192 °C). <sup>1</sup>H NMR (400 MHz, CDCl<sub>3</sub>) δ 8.28 (d, *J* = 8.8 Hz, 1H), 8.20 (d, *J* = 0.8 Hz, 1H), 8.00 (dd, *J* = 8.8, 1.2 Hz, 1H), 7.57 (d, *J* = 8.4 Hz, 2H), 7.20 (d, *J* = 8.0 Hz, 2H), 5.11 (t, *J* = 6.8 Hz, 1H), 4.04 – 3.83 (m, 5H), 2.92 – 2.80 (m, 1H), 2.79 – 2.68 (m, 1H), 2.49 – 2.27 (m, 4H), 1.90 (d, *J* = 12.4 Hz, 1H), 1.89 – 1.77 (m, 1H); <sup>13</sup>C NMR (100 MHz, CDCl<sub>3</sub>) δ 175.1, 166.9, 145.5, 138.8, 138.1, 135.6, 130.1, 128.3, 126.2, 126.0, 125.8, 121.4, 119.9, 115.0, 78.3, 52.1, 36.9, 35.8, 31.6, 21.5, 19.8; IR (neat): 2924, 2851, 1773(s), 1718(s), 1274, 1160, 765; HRESIMS Calcd for [C<sub>23</sub>H<sub>21</sub>NNaO<sub>6</sub>S]<sup>+</sup> (M + Na<sup>+</sup>) 462.0982, found 462.0994.

**9-methyl-7-tosyl-4,5,6,7-tetrahydro-1,4-methanooxocino[5,4-*b*]indol-2(1*H*)-one (2j)**

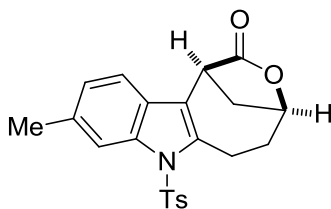

**2j**

Compound **2j** was prepared in 86% yield (68.0 mg) according to the general procedure (Table 2, entry 10). Pale yellow solid (mp 196-197 °C). <sup>1</sup>H NMR (400 MHz, CDCl<sub>3</sub>) δ 8.05 (s, 1H), 7.53 (d, *J* = 8.4 Hz, 2H), 7.33 (d, *J* = 8.0 Hz, 1H), 7.18 (d, *J* = 8.0 Hz, 2H), 7.11 (d, *J* = 8.0 Hz, 1H), 5.09 (t, *J* = 7.2 Hz, 1H), 3.90 (dt, *J* = 17.2, 4.4 Hz, 1H), 3.81 (d, *J* = 7.6 Hz, 1H), 2.89 – 2.77 (m, 1H), 2.75 – 2.63 (m, 1H), 2.49 (s, 3H), 2.44 – 2.37 (m, 1H), 2.34 (s, 3H), 1.87 (d, *J* = 12.4 Hz, 1H), 1.86 – 1.76 (m, 1H); <sup>13</sup>C NMR (125 MHz, CDCl<sub>3</sub>) δ 175.5, 145.0, 136.8, 135.9(3), 135.8(6), 135.0, 129.9, 126.3, 126.1, 125.3, 121.4, 117.3, 115.6, 78.4, 36.9, 35.9, 31.8, 22.0, 21.5, 19.8; IR (neat): 2923, 2854, 1768(s), 1461, 1357, 1177, 1152, 1043, 744; HRESIMS Calcd for [C<sub>22</sub>H<sub>21</sub>NNaO<sub>4</sub>S]<sup>+</sup> (M + Na<sup>+</sup>) 418.1083, found 418.1080.

**9-methoxy-7-tosyl-4,5,6,7-tetrahydro-1,4-methanooxocino[5,4-*b*]indol-2(1*H*)-one (2k)**

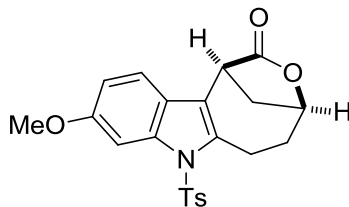

**2k**

Compound **2k** was prepared in 80% yield (65.8 mg) according to the general procedure (Table 2, entry 11). Pale yellow solid (mp 198-199 °C). <sup>1</sup>H NMR (500 MHz, CDCl<sub>3</sub>) δ 7.81 (d, *J* = 2.0 Hz, 1H), 7.53 (d, *J* = 8.5 Hz, 2H), 7.32 (d, *J* = 8.5 Hz, 1H), 7.19 (d, *J* = 8.5 Hz, 2H), 6.92 (dd, *J* = 8.5, 2.0 Hz, 1H), 5.09 (t, *J* = 7.0 Hz, 1H), 3.94 – 3.81 (m, 4H), 3.78 (d, *J* = 8.0 Hz, 1H), 2.86 – 2.78 (m, 1H), 2.74 – 2.66 (m, 1H), 2.44 – 2.36 (m, 1H), 2.35 (m, 3H), 1.88 (d, *J* = 12.5 Hz, 1H), 1.84 – 1.76 (m, 1H); <sup>13</sup>C NMR (125 MHz, CDCl<sub>3</sub>) δ 175.5, 158.1, 145.1, 137.4, 135.8, 135.2, 129.9, 126.1, 122.5, 121.4, 118.2, 112.8, 100.1, 78.5, 55.8, 36.9, 36.0, 31.8, 21.6, 19.9; IR (neat): 2924, 2852, 1774(s), 1612, 1491, 1362, 1270, 1042, 992, 584; HRESIMS Calcd for [C<sub>22</sub>H<sub>21</sub>NaO<sub>5</sub>S]<sup>+</sup> (M + Na<sup>+</sup>) 434.1033, found 434.1034.

**9-fluoro-7-tosyl-4,5,6,7-tetrahydro-1,4-methanooxocino[5,4-*b*]indol-2(1*H*)-one (2l)**

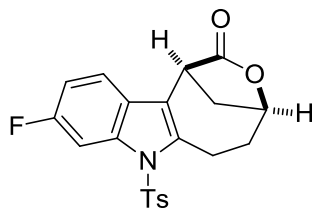

**2l**

Compound **2l** was prepared in 70% yield (55.9 mg) according to the general procedure (Table 2, entry 12). Pale yellow solid (mp 197-198 °C). <sup>1</sup>H NMR (400 MHz, CDCl<sub>3</sub>) δ 7.99 (dd, *J* = 10.4, 2.0 Hz, 1H), 7.63 – 7.51 (m, 2H), 7.45 – 7.32 (m, 1H), 7.22 (d, *J* = 8.0 Hz, 2H), 7.12 – 6.99 (m, 1H), 5.11 (t, *J* = 7.2 Hz, 1H), 3.91 (dt, *J* = 17.2, 4.0 Hz, 1H), 3.80 (d, *J* = 7.6 Hz, 1H), 2.95 – 2.78 (m, 1H), 2.77 – 2.65 (m, 1H), 2.46 – 2.35 (m, 1H), 2.36 (s, 3H), 1.90 (d, *J* = 12.0 Hz, 1H), 1.89 – 1.78 (m, 1H); <sup>13</sup>C NMR (125 MHz, CDCl<sub>3</sub>) δ 175.3, 161.0 (d, *J* = 241.4 Hz), 145.4, 136.8 (d, *J* = 4.1 Hz), 136.4 (d, *J* = 12.6 Hz), 135.6, 130.1, 126.2, 124.8, 120.8, 118.4 (d, *J* = 9.9 Hz), 112.1 (d, *J* = 24.4 Hz), 102.9 (d, *J* = 29.4 Hz), 78.4, 36.8, 36.0, 31.7, 21.6, 19.9; IR (neat): 2824, 1773(s), 1363, 1275,

1261, 993, 749; HRESIMS Calcd for  $[C_{21}H_{18}FNNaO_4S]^+$  ( $M + Na^+$ ) 422.0833, found 422.0836.

**9-chloro-7-tosyl-4,5,6,7-tetrahydro-1,4-methanooxocino[5,4-*b*]indol-2(1*H*)-one (2m)**

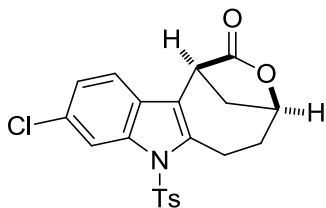

**2m**

Compound **2m** was prepared in 81% yield (67.2 mg) according to the general procedure (Table 2, entry 13). Pale yellow solid (mp 200-201 °C).  $^1H$  NMR (400 MHz,  $CDCl_3$ )  $\delta$  8.16 (d,  $J = 8.8$  Hz, 1H), 7.54 (d,  $J = 8.4$  Hz, 2H), 7.44 (d,  $J = 2.0$  Hz, 1H), 7.30 – 7.25 (m, 1H), 7.20 (d,  $J = 8.0$  Hz, 2H), 5.11 (t,  $J = 7.2$  Hz, 1H), 3.93 (dt,  $J = 17.2, 4.0$  Hz, 1H), 3.77 (d,  $J = 8.0$  Hz, 1H), 2.90 – 2.79 (m, 1H), 2.76 – 2.67 (m, 1H), 2.46 – 2.37 (m, 1H), 2.35 (m, 3H), 1.88 (d,  $J = 12.4$  Hz, 1H), 1.87 – 1.77 (m, 1H);  $^{13}C$  NMR (100 MHz,  $CDCl_3$ )  $\delta$  175.1, 145.5, 138.3, 135.6, 134.6, 130.1, 129.8(1), 129.7(5), 126.2, 125.0, 120.7, 117.5, 116.5, 78.3, 36.9, 35.9, 31.6, 21.6, 19.9; IR (neat): 2924, 1770(s), 1450, 1377, 1355, 1275, 1260, 764, 749; HRESIMS Calcd for  $[C_{21}H_{18}ClNaO_4S]^+$  ( $M + Na^+$ ) 438.0537, found 438.0539.

**9-bromo-7-tosyl-4,5,6,7-tetrahydro-1,4-methanooxocino[5,4-*b*]indol-2(1*H*)-one (2n)**

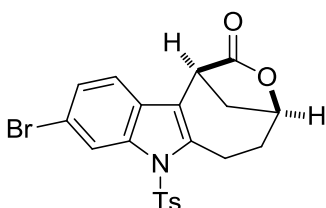

**2n**

Compound **2n** was prepared in 80% yield (73.4 mg) according to the general procedure (Table 2, entry 14). Pale yellow solid (mp 245-246 °C).  $^1H$  NMR (400 MHz,  $CDCl_3$ )  $\delta$  8.44 (d,  $J = 1.2$  Hz, 1H), 7.57 (d,  $J = 8.4$  Hz, 2H), 7.40 (dd,  $J = 8.4, 1.6$  Hz, 1H), 7.32 (d,  $J = 8.4$  Hz, 1H), 7.23 (d,  $J = 8.0$  Hz, 2H), 5.10 (t,  $J = 7.2$  Hz, 1H), 3.89 (dt,  $J = 17.2, 4.4$  Hz, 1H), 3.79 (d,  $J = 8.0$  Hz, 1H), 2.87 – 2.67 (m, 2H), 2.46 – 2.37 (m, 1H), 2.36 (s, 3H),



1.89 (d,  $J = 12.4$  Hz, 1H), 1.88 – 1.77 (m, 1H);  $^{13}\text{C}$  NMR (100 MHz,  $\text{CDCl}_3$ )  $\delta$  175.2, 145.5, 137.2, 136.9, 135.7, 130.1, 127.3, 127.1, 126.2, 120.9, 118.8, 118.5, 118.3, 78.4, 36.8, 35.9, 31.6, 21.6, 19.9; IR (neat): 2921, 2848, 1768(s), 1450, 1370, 1355, 1155, 584; HRESIMS Calcd for  $[\text{C}_{21}\text{H}_{18}\text{BrNNaO}_4\text{S}]^+$  ( $\text{M} + \text{Na}^+$ ) 482.0032, found 482.0039.

**methyl 2-oxo-7-tosyl-1,2,4,5,6,7-hexahydro-1,4-methanooxocino[5,4-*b*]indole-9-carboxylate (2o)**

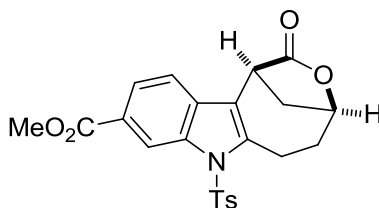

**2o**

Compound **2o** was prepared in 70% yield (61.5 mg) according to the general procedure (Table 2, entry 15). Pale yellow solid (mp 187-188 °C).  $^1\text{H}$  NMR (400 MHz,  $\text{CDCl}_3$ )  $\delta$  8.93 (s, 1H), 7.97 (dd,  $J = 8.4, 1.2$  Hz, 1H), 7.58 (d,  $J = 8.4$  Hz, 2H), 7.49 (d,  $J = 8.4$  Hz, 1H), 7.20 (d,  $J = 8.0$  Hz, 2H), 5.11 (t,  $J = 7.2$  Hz, 1H), 4.02 – 3.96 (m, 1H), 3.95 (s, 3H), 3.86 (d,  $J = 8.0$  Hz, 1H), 2.93 – 2.80 (m, 1H), 2.78 – 2.68 (m, 1H), 2.48 – 2.37 (m, 1H), 2.33 (s, 3H), 1.90 (d,  $J = 12.4$  Hz, 1H), 1.89 – 1.79 (m, 1H);  $^{13}\text{C}$  NMR (100 MHz,  $\text{CDCl}_3$ )  $\delta$  175.2, 167.2, 145.5, 140.0, 135.6(4), 135.5(5), 131.9, 130.1, 126.6, 126.2, 125.0, 121.0, 117.4, 117.0, 78.3, 52.2, 36.8, 35.9, 31.5, 21.5, 20.0; IR (neat): 2952, 1777(s), 1716(s), 1435, 1423, 1166, 1090, 995, 736, 579; HRESIMS Calcd for  $[\text{C}_{23}\text{H}_{21}\text{NNaO}_6\text{S}]^+$  ( $\text{M} + \text{Na}^+$ ) 462.0982, found 462.0994.

**8-methyl-7-tosyl-4,5,6,7-tetrahydro-1,4-methanooxocino[5,4-*b*]indol-2(1H)-one (2p)**

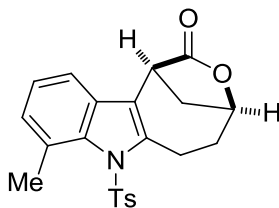

**2p**

Compound **2p** was prepared in 72% yield (56.9 mg) according to the general procedure (Table 2, entry 16). Pale yellow solid (mp 188-189 °C).  $^1\text{H}$  NMR (400 MHz,  $\text{CDCl}_3$ )  $\delta$

7.23 – 7.17 (m, 1H), 7.17 – 7.09 (m, 4H), 7.07 (d,  $J = 8.0$  Hz, 2H), 5.05 (t,  $J = 7.2$  Hz, 1H), 3.63 – 3.48 (m, 2H), 2.95 – 2.81 (m, 1H), 2.70 (s, 3H), 2.68 – 2.54 (m, 1H), 2.40 – 2.33 (m, 1H), 2.32 (s, 3H), 1.76 – 1.67 (m, 1H), 1.65 (d,  $J = 12.4$  Hz, 1H);  $^{13}\text{C}$  NMR (100 MHz,  $\text{CDCl}_3$ )  $\delta$  174.8, 144.7, 140.9, 139.4, 133.2, 133.0, 130.2, 129.1, 128.9, 127.1, 126.3, 125.5, 115.4, 78.4, 36.6, 35.8, 31.5, 22.5, 21.6, 21.5; IR (neat): 2923, 2854, 1770(s), 1462, 1357, 1180, 1152, 1043, 754; HRESIMS Calcd for  $[\text{C}_{22}\text{H}_{21}\text{NNaO}_4\text{S}]^+$  ( $\text{M} + \text{Na}^+$ ) 418.1083, found 418.1080.

**7-((4-bromophenyl)sulfonyl)-4,5,6,7-tetrahydro-1,4-methanooxocino[5,4-*b*]indol-2(1*H*)-one (2q)**

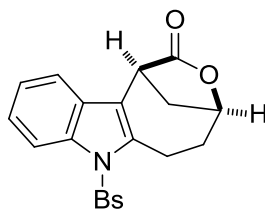

**2q**

Compound **2q** was prepared in 83% yield (73.8 mg) according to the general procedure (Table 2, entry 17). Pale yellow solid (mp 201-202 °C).  $^1\text{H}$  NMR (400 MHz,  $\text{CDCl}_3$ )  $\delta$  8.19 (dd,  $J = 7.2, 1.2$  Hz, 1H), 7.57 – 7.44 (m, 5H), 7.37 – 7.27 (m, 2H), 5.12 (t,  $J = 7.2$  Hz, 1H), 3.92 (dt,  $J = 17.2, 4.4$  Hz, 1H), 3.86 (d,  $J = 7.6$  Hz, 1H), 2.97 – 2.83 (m, 1H), 2.80 – 2.67 (m, 1H), 2.51 – 2.37 (m, 1H), 1.90 (d,  $J = 12.4$  Hz, 1H), 1.88 – 1.79 (m, 1H);  $^{13}\text{C}$  NMR (100 MHz,  $\text{CDCl}_3$ )  $\delta$  175.3, 137.4, 136.6, 136.2, 132.6, 129.2, 128.7, 127.5, 125.2, 124.3, 122.3, 117.9, 115.4, 78.3, 36.8, 35.9, 31.7, 19.9; IR (neat): 2921, 2850, 1768(s), 1450, 1375, 1355, 1157, 1088, 584; HRESIMS Calcd for  $[\text{C}_{20}\text{H}_{16}\text{BrNNaO}_4\text{S}]^+$  ( $\text{M} + \text{Na}^+$ ) 467.9876, found 467.9880.

**7-(methylsulfonyl)-4,5,6,7-tetrahydro-1,4-methanooxocino[5,4-*b*]indol-2(1*H*)-one (2r)**

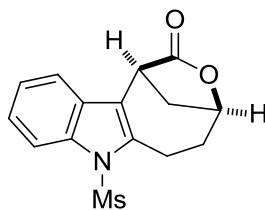

**2r**

Compound **2r** was prepared in 80% yield (48.8 mg) according to the general procedure (Table 2, entry 18). Pale yellow solid (mp 171-172 °C). <sup>1</sup>H NMR (400 MHz, CDCl<sub>3</sub>) δ 8.08 – 7.99 (m, 1H), 7.60 – 7.51 (m, 1H), 7.38 – 7.29 (m, 2H), 5.16 (t, *J* = 7.2 Hz, 1H), 3.98 – 3.86 (m, 2H), 3.05 – 2.94 (m, 4H), 2.85 – 2.72 (m, 1H), 2.52 – 2.41 (m, 1H), 2.00 (d, *J* = 12.0 Hz, 1H), 1.99 – 1.89 (m, 1H); <sup>13</sup>C NMR (100 MHz, CDCl<sub>3</sub>) δ 175.6, 136.6, 135.8, 128.4, 125.0, 124.0, 121.1, 117.9, 114.7, 78.5, 41.2, 36.8, 35.9, 31.7, 19.5; IR (neat): 2927, 2853, 1763(s), 1451, 1358, 1204, 1148, 974, 747; HRESIMS Calcd for [C<sub>15</sub>H<sub>15</sub>NNaO<sub>4</sub>S]<sup>+</sup> (M + Na<sup>+</sup>) 328.0614, found 328.0618.

**5-methyl-7-tosyl-4,5,6,7-tetrahydro-1,4-methanooxocino[5,4-*b*]indol-2(1*H*)-one (2s)**

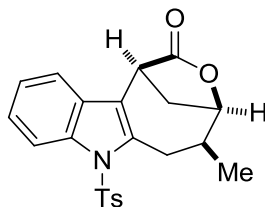

**2s**

Compound **2s** was prepared in 63% yield (49.8 mg; dr = 4:1) according to the general procedure (Table 2, entry 19). Pale yellow solid (mp 185-186 °C). <sup>1</sup>H NMR (500 MHz, CDCl<sub>3</sub>) δ 8.23 (d, *J* = 8.0 Hz, 1H), 7.54 (d, *J* = 8.5 Hz, 2H), 7.44 (d, *J* = 7.5 Hz, 1H), 7.37 – 7.24 (m, 2H), 7.18 (d, *J* = 8.0 Hz, 2H), 4.80 (d, *J* = 8.0 Hz, 1H), 3.91 (dd, *J* = 17.0, 4.0 Hz, 1H), 3.81 (d, *J* = 7.5 Hz, 1H), 2.78 – 2.68 (m, 1H), 2.66 – 2.56 (m, 1H), 2.34 (s, 3H), 2.08 – 1.96 (m, 1H), 1.88 (d, *J* = 12.5 Hz, 1H), 1.25 (d, *J* = 7.0 Hz, 3H); <sup>13</sup>C NMR (125 MHz, CDCl<sub>3</sub>) δ 175.6, 145.1, 136.2, 135.7, 135.4, 129.9, 128.4, 126.1, 124.9, 123.9, 121.9, 117.6, 115.5, 84.3, 37.9, 37.5, 35.4, 27.7, 21.5(4), 21.4(9); IR (neat): 2923, 2850, 1766(s), 1451, 1364, 1170, 1106, 1088, 747, 579; HRESIMS Calcd for [C<sub>22</sub>H<sub>21</sub>NNaO<sub>4</sub>S]<sup>+</sup> (M + Na<sup>+</sup>) 418.1083, found 418.1083.

**4-phenyl-7-tosyl-4,5,6,7-tetrahydro-1,4-methanooxocino[5,4-*b*]indol-2(1*H*)-one (2t)**

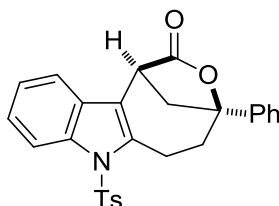

## 2t

Compound **2t** was prepared in 68% yield (62.2 mg) according to the general procedure (Table 2, entry 20). Pale yellow solid (mp 170-171 °C). <sup>1</sup>H NMR (400 MHz, CDCl<sub>3</sub>) δ 8.27 (d, *J* = 8.0 Hz, 1H), 7.58 (d, *J* = 7.6 Hz, 2H), 7.48 (d, *J* = 7.2 Hz, 1H), 7.45 – 7.27 (m, 7H), 7.20 (d, *J* = 8.4 Hz, 2H), 4.19 – 3.93 (m, 2H), 3.05 – 2.86 (m, 1H), 2.80 – 2.65 (m, 1H), 2.50 – 2.30 (m, 5H), 2.25 – 2.13 (m, 1H); <sup>13</sup>C NMR (100 MHz, CDCl<sub>3</sub>) δ 174.5, 145.2, 136.2, 135.8, 129.9, 128.8, 128.5, 127.8, 126.2, 124.9, 123.9, 123.5, 121.3, 117.6, 115.4, 88.3, 43.3, 39.7, 37.7, 21.5, 21.0; IR (neat): 2922, 1774(s), 1449, 1363, 1192, 1171, 1090, 748; HRESIMS Calcd for [C<sub>27</sub>H<sub>23</sub>NNaO<sub>4</sub>S]<sup>+</sup> (M + Na<sup>+</sup>) 480.1240, found 480.1244.

## 9-methyl-4-phenyl-7-tosyl-4,5,6,7-tetrahydro-1,4-methanooxocino[5,4-*b*]indol-2(1*H*)-one (2u)

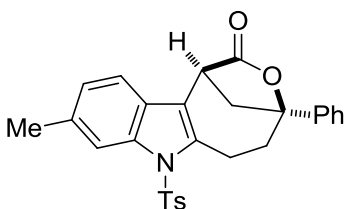

## 2u

Compound **2u** was prepared in 75% yield (70.7 mg) according to the general procedure (Table 2, entry 21). Pale yellow solid (mp 205-206 °C). <sup>1</sup>H NMR (500 MHz, CDCl<sub>3</sub>) δ 8.09 (s, 1H), 7.57 (d, *J* = 8.5 Hz, 2H), 7.44 – 7.29 (m, 6H), 7.21 (d, *J* = 8.0 Hz, 2H), 7.13 (d, *J* = 8.0 Hz, 1H), 4.08 – 3.98 (m, 2H), 3.00 – 2.81 (m, 1H), 2.77 – 2.63 (m, 1H), 2.51 (s, 3H), 2.42 – 2.35 (m, 4H), 2.32 (d, *J* = 12.5 Hz, 1H), 2.20 – 2.11 (m, 1H); <sup>13</sup>C NMR (125 MHz, CDCl<sub>3</sub>) δ 174.5, 145.2, 145.0, 136.7, 136.0, 135.4, 135.1, 129.9, 128.7, 127.7, 126.3, 126.1, 125.3, 123.5, 121.3, 117.2, 115.6, 88.3, 43.3, 39.8, 37.8, 22.0, 21.5, 21.0; IR (neat): 2921, 1775(s), 1448, 1363, 1171, 1148, 1090, 701, 582; HRESIMS Calcd for [C<sub>28</sub>H<sub>25</sub>NNaO<sub>4</sub>S]<sup>+</sup> (M + Na<sup>+</sup>) 494.1397, found 494.1400.

## 10-chloro-4-phenyl-7-tosyl-4,5,6,7-tetrahydro-1,4-methanooxocino[5,4-*b*]indol-2(1*H*)-one (2v)

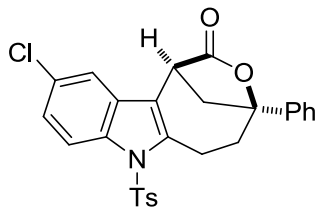

**2v**

Compound **2v** was prepared in 60% yield (58.9 mg) according to the general procedure (Table 2, entry 22). Pale yellow solid (mp 188-189 °C).  $^1\text{H}$  NMR (500 MHz,  $\text{CDCl}_3$ )  $\delta$  8.19 (d,  $J = 9.0$  Hz, 1H), 7.57 (d,  $J = 8.5$  Hz, 2H), 7.46 (d,  $J = 2.0$  Hz, 1H), 7.43 – 7.31 (m, 5H), 7.30 (dd,  $J = 9.0, 2.0$  Hz, 1H), 7.23 (d,  $J = 8.0$  Hz, 2H), 4.07 (dt,  $J = 17.0, 4.0$  Hz, 1H), 3.99 (d,  $J = 8.0$  Hz, 1H), 2.98 – 2.88 (m, 1H), 2.76 – 2.68 (m, 1H), 2.45 – 2.38 (m, 1H), 2.37 (s, 3H), 2.33 (d,  $J = 12.0$  Hz, 1H), 2.23 – 2.13 (m, 1H);  $^{13}\text{C}$  NMR (125 MHz,  $\text{CDCl}_3$ )  $\delta$  174.1, 145.5, 145.0, 137.8, 135.5, 134.5, 130.1, 129.8, 129.7, 128.8, 127.9, 126.2, 125.0, 123.4, 120.5, 117.5, 116.5, 88.3, 43.2, 39.6, 37.7, 21.6, 21.1; IR (neat): 2922, 1777(s), 1451, 1364, 1171, 1090, 574; HRESIMS Calcd for  $[\text{C}_{27}\text{H}_{22}\text{ClNNaO}_4\text{S}]^+$  ( $\text{M} + \text{Na}^+$ ) 514.0850, found 514.0853.

**10-bromo-4-phenyl-7-tosyl-4,5,6,7-tetrahydro-1,4-methanooxocino[5,4 *b*]indol-2(1*H*)-one (2w)**

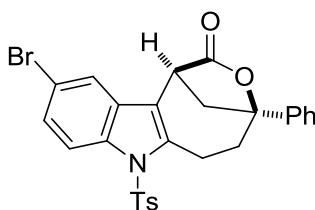

**2w**

Compound **2w** was prepared in 66% yield (70.6 mg) according to the general procedure (Table 2, entry 23). Pale yellow solid (mp 230-231 °C).  $^1\text{H}$  NMR (500 MHz,  $\text{CDCl}_3$ )  $\delta$  8.14 (d,  $J = 9.0$  Hz, 1H), 7.62 (d,  $J = 2.0$  Hz, 1H), 7.57 (d,  $J = 8.5$  Hz, 2H), 7.46 – 7.30 (m, 6H), 7.23 (d,  $J = 8.5$  Hz, 2H), 4.07 (dt,  $J = 17.0, 4.0$  Hz, 1H), 3.99 (d,  $J = 8.0$  Hz, 1H), 2.97 – 2.87 (m, 1H), 2.75 – 2.68 (m, 1H), 2.46 – 2.38 (m, 1H), 2.37 (s, 3H), 2.33 (d,  $J = 12.5$  Hz, 1H), 2.22 – 2.14 (m, 1H);  $^{13}\text{C}$  NMR (125 MHz,  $\text{CDCl}_3$ )  $\delta$  174.0, 145.5, 145.0, 137.7, 135.6, 135.0, 130.1, 128.8, 127.9, 127.7, 126.2, 123.4, 120.5, 120.4, 117.5, 116.9, 88.3, 43.3, 39.6, 37.7, 21.6, 21.1; IR (neat): 2291, 1777(s), 1450, 1378, 1359, 1192, 1168,

1090, 590; HRESIMS Calcd for  $[C_{27}H_{22}BrNNaO_4S]^+$  ( $M + Na^+$ ) 558.0345, found 558.0356.

**4-(*p*-tolyl)-7-tosyl-4,5,6,7-tetrahydro-1,4-methanooxocino[5,4-*b*]indol-2(1*H*)-one (2x)**

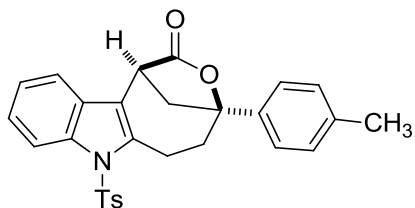

**2x**

Compound **2x** was prepared in 64% yield (60.3 mg) according to the general procedure (Table 2, entry 24). Pale yellow solid (mp 200-201 °C).  $^1H$  NMR (400 MHz,  $CDCl_3$ )  $\delta$  8.27 (d,  $J = 7.6$  Hz, 1H), 7.58 (d,  $J = 8.4$  Hz, 2H), 7.53 – 7.44 (m, 1H), 7.40 – 7.12 (m, 8H), 4.16 – 3.98 (m, 2H), 3.03 – 2.87 (m, 1H), 2.78 – 2.64 (m, 1H), 2.49 – 2.27 (m, 8H), 2.22 – 2.07 (m, 1H);  $^{13}C$  NMR (100 MHz,  $CDCl_3$ )  $\delta$  174.6, 145.1, 142.4, 137.5, 136.3, 135.8, 129.9, 129.4, 128.5, 126.2, 125.0, 123.9, 123.5, 121.4, 117.7, 115.5, 88.4, 43.4, 39.8, 37.8, 21.5, 21.0; IR (neat): 2921, 1770(s), 1450, 1365, 1171, 1150, 1090, 701, 575; HRESIMS Calcd for  $[C_{28}H_{25}NNaO_4S]^+$  ( $M + Na^+$ ) 494.1397, found 494.1400.

**4-(4-chlorophenyl)-7-tosyl-4,5,6,7-tetrahydro-1,4-methanooxocino[5,4-*b*]indol-2(1*H*)-one (2y)**

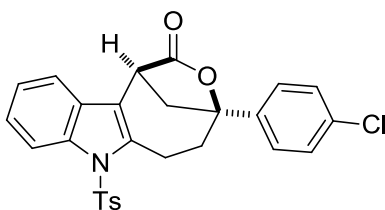

**2y**

Compound **2y** was prepared in 61% yield (59.9 mg) according to the general procedure (Table 2, entry 25). Pale yellow solid (mp 190-191 °C).  $^1H$  NMR (400 MHz,  $CDCl_3$ )  $\delta$  8.26 (dd,  $J = 7.2, 0.4$  Hz, 1H), 7.58 (d,  $J = 8.4$  Hz, 2H), 7.51 – 7.44 (m, 1H), 7.40 – 7.28 (m, 6H), 7.20 (d,  $J = 8.0$  Hz, 2H), 4.15 – 4.01 (m, 2H), 3.02 – 2.82 (m, 1H), 2.74 – 2.60 (m, 1H), 2.43 – 2.26 (m, 5H), 2.23 – 2.07 (m, 1H);  $^{13}C$  NMR (100 MHz,  $CDCl_3$ )  $\delta$  174.2, 145.2, 143.6, 136.2, 136.1, 135.8, 133.7, 130.0, 129.0, 128.4, 126.2, 125.0, 123.9, 121.1,

117.6, 115.5, 87.8, 43.3, 39.6, 37.7, 21.6, 20.9; IR (neat): 2930, 1780(s), 1450, 1360, 1171, 1090, 585; HRESIMS Calcd for  $[C_{27}H_{22}ClNNaO_4S]^+$  ( $M + Na^+$ ) 514.0850, found 514.0853.

**4-methyl-7-tosyl-4,5,6,7-tetrahydro-1,4-methanooxocino[5,4-*b*]indol-2(1*H*)-one (2z)**

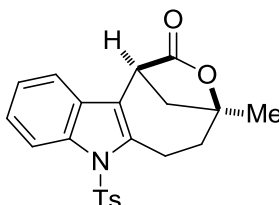

**2z**

Compound **2z** was prepared in 67% yield (52.9 mg) according to the general procedure (Table 2, entry 26). Pale yellow solid (mp 221-222 °C).  $^1H$  NMR (400 MHz,  $CDCl_3$ )  $\delta$  8.26 (d,  $J = 7.6$  Hz, 1H), 7.57 (d,  $J = 8.0$  Hz, 2H), 7.47 (d,  $J = 7.2$  Hz, 1H), 7.38 – 7.25 (m, 2H), 7.20 (d,  $J = 8.4$  Hz, 2H), 4.06 – 3.93 (m, 2H), 2.90 – 2.78 (m, 1H), 2.50 – 2.40 (m, 1H), 2.35 (s, 3H), 2.30 – 2.22 (m, 1H), 1.93 (d,  $J = 12.4$  Hz, 1H), 1.88 – 1.77 (m, 1H), 1.59 (s, 3H);  $^{13}C$  NMR (125 MHz,  $CDCl_3$ )  $\delta$  175.0, 145.1, 136.3, 136.2, 135.7, 129.9, 128.5, 126.2, 124.8, 123.8, 121.3, 117.6, 115.4, 86.0, 43.1, 38.2, 38.1, 29.1, 21.6, 20.8; IR (neat): 2923, 2851, 1768(s), 1451, 1364, 1170, 1106, 1088, 748, 579; HRESIMS Calcd for  $[C_{22}H_{21}NNaO_4S]^+$  ( $M + Na^+$ ) 418.1083, found 418.1080.

**1,4,5,6-tetrahydro-2*H*-1,4-methanooxocino[5,4-*b*]benzofuran-2-one (4a)**

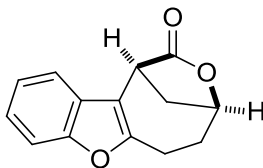

**4a**

Compound **4a** was prepared in 61% yield (27.8 mg) according to the general procedure. Pale yellow solid (mp 154-155 °C).  $^1H$  NMR (400 MHz,  $CDCl_3$ )  $\delta$  7.56 – 7.47 (m, 1H), 7.44 – 7.36 (m, 1H), 7.32 – 7.17 (m, 2H), 5.15 (t,  $J = 7.2$  Hz, 1H), 3.81 (d,  $J = 7.6$  Hz, 1H), 3.18 – 2.98 (m, 2H), 2.87 – 2.76 (m, 1H), 2.51 – 2.40 (m, 1H), 2.03 (d,  $J = 12.4$  Hz, 1H), 2.00 – 1.89 (m, 1H);  $^{13}C$  NMR (100 MHz,  $CDCl_3$ )  $\delta$  175.5, 154.5, 153.4, 127.6, 123.9, 122.8, 118.1, 115.2, 110.9, 78.3, 37.2, 34.9, 30.0, 22.0; IR (neat): 2948, 1768(s),

1453, 1274, 1258, 1155, 1040, 749; HRESIMS Calcd for  $[C_{14}H_{12}NaO_3]^+$  ( $M + Na^+$ ) 251.0679, found 251.0679.

**1-tosyl-4,7,8,9-tetrahydro-4,7-methanooxocino[5,4-*b*]pyrrol-5(1*H*)-one (4b)**

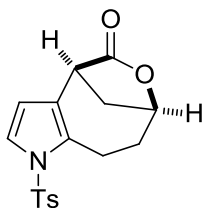

**4b**

Compound **4b** was prepared in 66% yield (43.7 mg) according to the general procedure. Pale yellow oil.  $^1H$  NMR (400 MHz,  $CDCl_3$ )  $\delta$  7.61 (d,  $J = 8.4$  Hz, 2H), 7.29 (d,  $J = 8.4$  Hz, 2H), 7.24 (d,  $J = 3.2$  Hz, 1H), 6.16 (d,  $J = 3.6$  Hz, 1H), 5.01 (t,  $J = 7.2$  Hz, 1H), 3.55 – 3.38 (m, 2H), 2.67 – 2.56 (m, 1H), 2.53 – 2.39 (m, 4H), 2.34 – 2.23 (m, 1H), 1.88 (d,  $J = 12.4$  Hz, 1H), 1.79 – 1.66 (m, 1H);  $^{13}C$  NMR (100 MHz,  $CDCl_3$ )  $\delta$  175.9, 145.3, 135.9, 130.2, 129.7, 126.8, 125.8, 121.3, 111.9, 78.4, 39.3, 37.4, 31.6, 21.6, 18.9; IR (neat):

2923, 2851, 1768(s), 1451, 1364, 1170, 1106, 1088, 748, 579; HRESIMS Calcd for  $[C_{17}H_{17}NNaO_4S]^+$  ( $M + Na^+$ ) 354.0770, found 354.0779.

**8,9-dimethoxy-1,4,5,6-tetrahydro-2*H*-1,4-methanobenzo[*d*]oxocin-2-one (4c)**

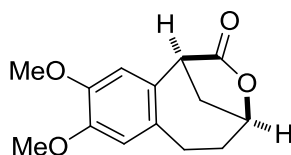

**4c**

Compound **4c** was prepared in 54% yield (26.8 mg) according to the general procedure. Pale yellow solid (mp 241-242 °C).  $^1H$  NMR (400 MHz,  $CDCl_3$ )  $\delta$  6.69 (s, 1H), 6.68 (s, 1H), 5.06 (t,  $J = 7.2$  Hz, 1H), 3.85 (s, 3H), 3.84 (s, 3H), 3.54 (d,  $J = 8.8$  Hz, 1H), 3.18 – 3.06 (m, 1H), 2.78 – 2.60 (m, 2H), 2.40 – 2.29 (m, 1H), 1.92 (d,  $J = 12.4$  Hz, 1H), 1.90–1.80 (m, 1H);  $^{13}C$  NMR (100 MHz,  $CDCl_3$ )  $\delta$  177.3, 147.5, 147.2, 131.3, 131.1, 114.7, 113.5, 78.7, 56.0, 55.9, 46.9, 38.2, 33.4, 29.1; IR (neat): 2936, 1766(s), 1515, 1453, 1276,



1252, 1103, 749; HRESIMS Calcd for  $[C_{14}H_{16}NaO_4]^+$  ( $M + Na^+$ ) 271.0941, found 271.0943.

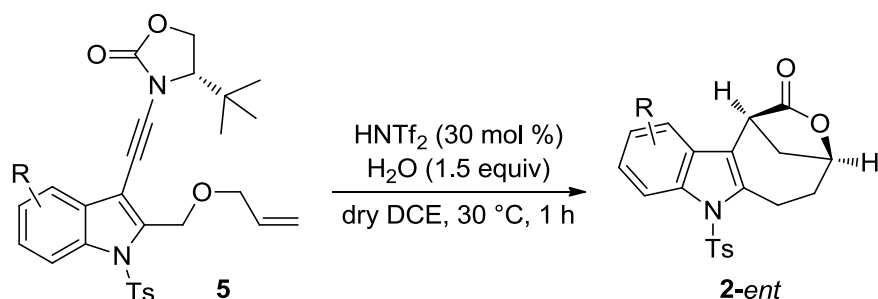

**General procedure for the synthesis of chiral bridged [4.2.1] lactones *2-ent*:**

HNTf<sub>2</sub> (0.06 mmol, 16.8 mg) was added to a mixture of the chiral ynamide **5** (0.20 mmol), water (0.30 mmol, 5.4 uL) and dry DCE (2.0 mL) at room temperature. Then, the reaction mixture was stirred at 30 °C and the progress of the reaction was monitored by TLC. The reaction typically took 1 h. Upon completion, the mixture was concentrated and the residue was purified by chromatography on silica gel (eluent: hexanes/ethyl acetate) to afford the desired chiral bridged [4.2.1] lactone **2-ent**.

**(1*S*,4*S*)-7-tosyl-4,5,6,7-tetrahydro-1,4-methanooxocino[5,4-*b*]indol-2(1*H*)-one (*2a-ent*)**

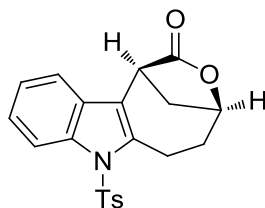

**2a-ent**

Compound **2a-ent** was prepared in 55% yield (41.9 mg) according to the general procedure (Table 3, entry 1). 95% ee (determined by HPLC: Chiralcel OD-H Column, 10/90 *i*-PrOH/hexane, 1.0 mL/min, 200 nm; TR = 27.21 min (minor), 33.53 min (major)).

**(1*S*,4*S*)-10-methyl-7-tosyl-4,5,6,7-tetrahydro-1,4-methanooxocino[5,4-*b*]indol-2(1*H*)-one (*2b-ent*)**

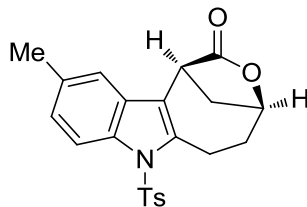

**2b-ent**

Compound **2b-ent** was prepared in 50% yield (35.9 mg) according to the general procedure (Table 3, entry 2). 99% ee (determined by HPLC: Chiralcel OD-H Column, 15/85 *i*-PrOH/hexane, 1.3 mL/min, 200 nm; TR = 15.57 min (major), 21.21 min (minor)).

**(1*S*,4*S*)-10-chloro-7-tosyl-4,5,6,7-tetrahydro-1,4-methanooxocino[5,4-*b*]indol-2(1*H*)-one (2e-ent)**

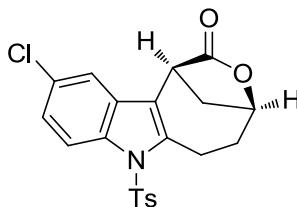

**2e-ent**

Compound **2c-ent** was prepared in 52% yield (43.2 mg) according to the general procedure (Table 3, entry 3). 91% ee (determined by HPLC: Chiralcel OD-H Column, 5/95 *i*-PrOH/hexane, 1.3 mL/min, 200 nm; TR = 33.00 min (minor), 36.73 min (major)).

**(1*S*,4*S*)-10-bromo-7-tosyl-4,5,6,7-tetrahydro-1,4-methanooxocino[5,4-*b*]indol-2(1*H*)-one (2f-ent)**

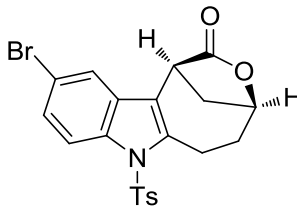

**2f-ent**

Compound **2f-ent** was prepared in 53% yield (48.6 mg) according to the general procedure (Table 3, entry 4). 98% ee (determined by HPLC: Chiralcel OD-H Column, 5/95 *i*-PrOH/hexane, 1.3 mL/min, 200 nm; TR = 34.94 min (minor), 39.54 min (major)).

methyl (1*S*,4*S*)-2-oxo-7-tosyl-1,2,4,5,6,7-hexahydro-1,4-methanooxocino[5,4-*b*]indole-10-carboxylate (**2i-ent**)

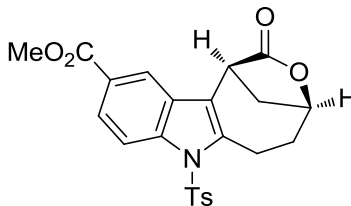

**2i-ent**

Compound **2i-ent** was prepared in 51% yield (44.8 mg) according to the general procedure (Table 3, entry 5).  $[\alpha]_D^{20} = -40.7^\circ$  ( $c = 1.0$ ,  $\text{CHCl}_3$ ). 92% ee (determined by HPLC: Chiralcel IA Column, 10/90 *i*-PrOH/hexane, 2.0 mL/min, 200 nm; TR = 17.49 min (minor), 21.05 min (major)).

(1*S*,4*S*)-9-methyl-7-tosyl-4,5,6,7-tetrahydro-1,4-methanooxocino[5,4-*b*]indol-2(1*H*)-one (**2j-ent**)

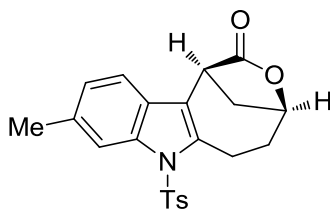

**2j-ent**

Compound **2j-ent** was prepared in 42% yield (33.2 mg) according to the general procedure (Table 3, entry 6). 98% ee (determined by HPLC: Chiralcel OD-H Column, 15/85 *i*-PrOH/hexane, 1.3 mL/min, 200 nm; TR = 31.00 min (minor), 34.39 min (major)).

(1*R*,4*R*)-10-methyl-7-tosyl-4,5,6,7-tetrahydro-1,4-methanooxocino[5,4-*b*]indol-2(1*H*)-one (**2a-ent'**)

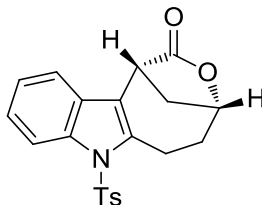

**2a-ent'**

Compound **2a-ent** was prepared in 56% yield (42.7 mg) according to the general procedure (Table 3, entry 7).  $[\alpha]_D^{20} = +10.7^\circ (c = 1.0, \text{CHCl}_3)$ . 96% ee (determined by HPLC: Chiralcel OD-H Column, 10/90 *i*-PrOH/hexane, 1.0 mL/min, 200 nm; TR = 25.17 min (major), 32.09 min (minor)).

#### 4,5,6,7-tetrahydro-1,4-methanooxocino[5,4-*b*]indol-2(1*H*)-one (**2ab**)

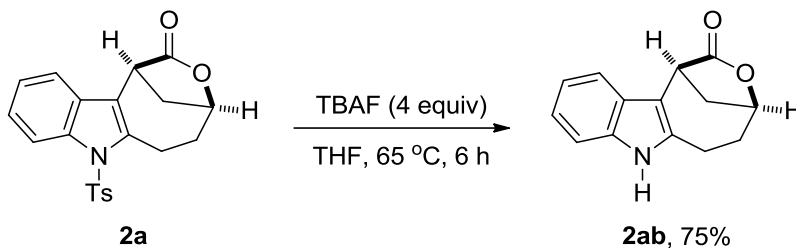

Compound **2ab** was prepared in 75% yield (34.1 mg) according to the known procedures (0.2 mmol scale).<sup>5</sup> Pale yellow solid (mp 143-144 °C). <sup>1</sup>H NMR (400 MHz, DMSO)  $\delta$  11.04 (s, 1H), 7.54 (d,  $J = 7.2$  Hz, 1H), 7.31 – 7.25 (m, 1H), 7.12 – 6.67 (m, 2H), 5.14 (t,  $J = 7.2$  Hz, 1H), 3.95 (d,  $J = 7.6$  Hz, 1H), 3.00 – 2.69 (m, 3H), 2.39 – 2.26 (m, 1H), 1.99 – 1.91 (m, 1H), 1.89 (d,  $J = 12.4$  Hz, 1H); <sup>13</sup>C NMR (125 MHz, DMSO)  $\delta$  177.7, 136.7, 135.1, 127.9, 121.6, 119.8, 118.1, 111.7, 111.6, 79.2, 38.1, 36.5, 31.7, 22.3; IR (neat): 3270, 2923, 2851, 1760(s), 1515, 1455, 1360, 1172, 952, 742; HRESIMS Calcd for  $[\text{C}_{14}\text{H}_{13}\text{NNaO}_2]^+$  ( $\text{M} + \text{Na}^+$ ) 250.0838, found 250.0839.

#### 7-tosyl-1,2,4,5,6,7-hexahydro-1,4-methanooxocino[5,4-*b*]indol-2-ol (**2ac**)

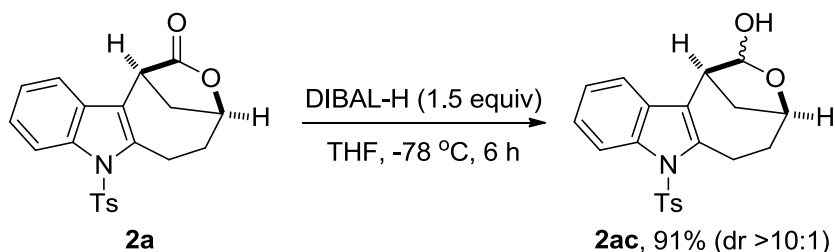

Compound **2ac** was prepared in 91% yield (69.7 mg; dr > 10/1) according to the known procedures (0.2 mmol scale).<sup>6</sup> Pale yellow oil. <sup>1</sup>H NMR (400 MHz, CDCl<sub>3</sub>)  $\delta$  8.25 (dd,  $J = 7.2, 1.2$  Hz, 1H), 7.54 (d,  $J = 8.0$  Hz, 2H), 7.48 – 7.41 (m, 1H), 7.34 – 7.22 (m, 2H), 7.16 (d,  $J = 8.0$  Hz, 2H), 5.24 (d,  $J = 2.8$  Hz, 1H), 4.87 (t,  $J = 7.2$  Hz, 1H), 3.62 (dt,  $J =$

17.2, 4.4 Hz, 1H), 3.46 (d,  $J = 6.4$  Hz, 1H), 3.12 (s, 1H), 3.05 – 2.90 (m, 1H), 2.72 – 2.59 (m, 1H), 2.33 (s, 3H), 2.23 – 2.09 (m, 1H), 1.67 (d,  $J = 12.0$  Hz, 1H), 1.60 – 1.48 (m, 1H);  $^{13}\text{C}$  NMR (100 MHz,  $\text{CDCl}_3$ )  $\delta$  144.7, 137.2, 136.5, 136.1, 129.7, 129.6, 126.2, 124.4, 123.6, 123.3, 117.7, 115.5, 102.9, 78.6, 41.3, 35.6, 32.2, 21.5, 20.9; IR (neat): 2930, 2851, 1750(s), 1450, 1250, 1170, 568; HRESIMS Calcd for  $[\text{C}_{21}\text{H}_{21}\text{NNaO}_4\text{S}]^+$  ( $\text{M} + \text{Na}^+$ ) 406.1083, found 406.1095.

### 7-tosyl-1,2,4,5,6,7-hexahydro-1,4-methanooxocino[5,4-*b*]indole (**2ad**)

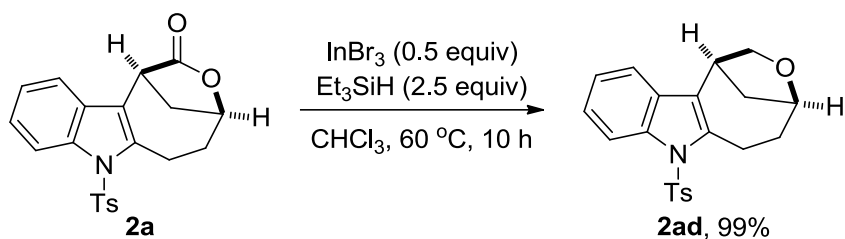

Compound **2ad** was prepared in 99% yield (72.7 mg) according to the known procedures (0.2 mmol scale).<sup>7</sup> Pale yellow solid (mp 150-151 °C).  $^1\text{H}$  NMR (400 MHz,  $\text{CDCl}_3$ )  $\delta$  8.24 (dd,  $J = 7.2, 1.6$  Hz, 1H), 7.54 (d,  $J = 8.4$  Hz, 2H), 7.43 – 7.36 (m, 1H), 7.32 – 7.20 (m, 2H), 7.14 (d,  $J = 8.4$  Hz, 2H), 4.69 (t,  $J = 7.6$  Hz, 1H), 4.12 (dd,  $J = 7.6, 5.6$  Hz, 1H), 3.86 (d,  $J = 7.6$  Hz, 1H), 3.65 (dt,  $J = 16.8, 4.4$  Hz, 1H), 3.56 (t,  $J = 6.0$  Hz, 1H), 3.13 – 2.95 (m, 1H), 2.41 – 2.22 (m, 4H), 2.19 – 2.08 (m, 1H), 1.73 (d,  $J = 11.6$  Hz, 1H), 1.58 – 1.43 (m, 1H);  $^{13}\text{C}$  NMR (100 MHz,  $\text{CDCl}_3$ )  $\delta$  144.5, 137.0, 136.3, 136.0, 129.6, 129.5, 127.1, 126.1, 124.0, 123.4, 117.3, 115.5, 77.2, 75.6, 38.7, 34.0, 32.1, 21.4, 20.7; IR (neat): 2923, 1451, 1376, 1361, 1176, 1089, 1060, 748, 579; HRESIMS Calcd for  $[\text{C}_{21}\text{H}_{21}\text{NNaO}_3\text{S}]^+$  ( $\text{M} + \text{Na}^+$ ) 390.1134, found 390.1141.

### 7-tosyl-4,7-dihydro-1,4-methanooxocino[5,4-*b*]indol-2(1*H*)-one (**2ae**)

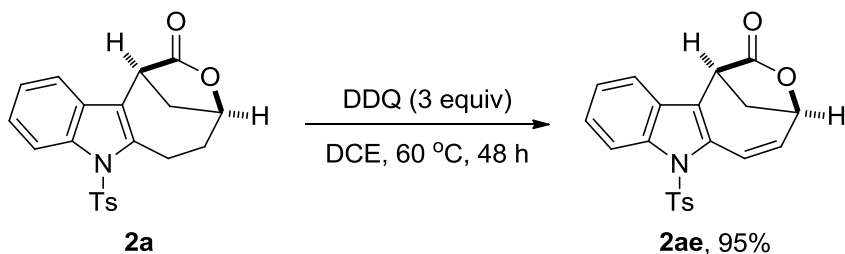

Compound **2ae** was prepared in 95% yield (72.0 mg) according to the known procedures (0.2 mmol scale).<sup>8</sup> Pale yellow solid (mp 187-188 °C). <sup>1</sup>H NMR (400 MHz, CDCl<sub>3</sub>) δ 8.26 (d, *J* = 8.4 Hz, 1H), 7.73 (dd, *J* = 12.0, 0.8 Hz, 1H), 7.68 – 7.48 (m, 3H), 7.46 – 7.29 (m, 2H), 7.16 (d, *J* = 8.0 Hz, 2H), 6.45 – 6.22 (m, 1H), 5.09 (t, *J* = 7.2 Hz, 1H), 4.07 (d, *J* = 7.2 Hz, 1H), 2.85 – 2.67 (m, 1H), 2.31 (s, 3H), 2.14 – 1.97 (m, 1H); <sup>13</sup>C NMR (100 MHz, CDCl<sub>3</sub>) δ 172.9, 145.2, 137.1, 135.0, 132.9, 129.8, 128.9, 128.5, 126.7, 126.3, 124.6, 123.3, 122.9, 119.0, 115.8, 73.7, 36.1, 27.0, 21.5; IR (neat): 2922, 1763(s), 1449, 1364, 1275, 1261, 1172, 764, 749; HRESIMS Calcd for [C<sub>21</sub>H<sub>17</sub>NNaO<sub>4</sub>S]<sup>+</sup> (M + Na<sup>+</sup>) 402.0770, found 402.0777.

**(7-hydroxy-5-tosyl-5,6,7,8,9,10-hexahydrocyclohepta[b]indol-10-yl)(phenyl)methanone (2af)**

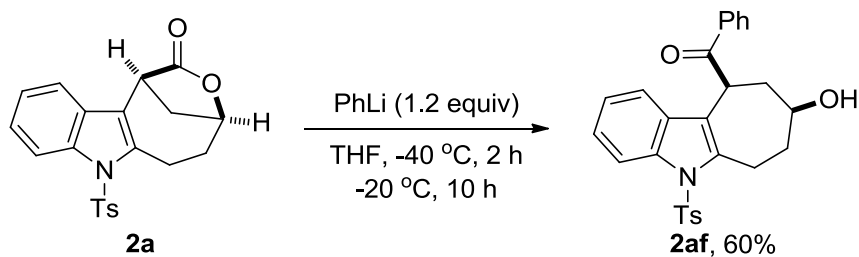

PhLi (0.24 mmol, 1.2 equiv) was slowly added to the mixture of **2a** (0.20 mmol, 76.3 mg) in dry THF (4.0 mL) under N<sub>2</sub> at -40 °C. The mixture was stirred at -40 °C for 2 h, and then stirred at -20 °C for another 10 h. Upon completion, the mixture was quenched by the saturated ammonium chloride and extracted with EtOAc (3 × 10 mL). The combined extracts were dried with MgSO<sub>4</sub>, and the solvent was removed under reduced pressure. The residue was purified by chromatography on silica gel (eluent: hexanes/ethyl acetate) to afford the desired **2af** in 60% yield (55.1 mg). Pale yellow oil. <sup>1</sup>H NMR (400 MHz, CDCl<sub>3</sub>) δ 8.22 (d, *J* = 8.4 Hz, 1H), 8.08 – 7.93 (m, 2H), 7.65 – 7.54 (m, 3H), 7.51 – 7.41 (m, 2H), 7.26 – 7.13 (m, 5H), 5.11 (dd, *J* = 5.2, 4.0 Hz, 1H), 4.07 – 3.93 (m, 1H), 3.75 – 3.63 (m, 1H), 3.19 – 3.00 (m, 1H), 2.60 – 2.49 (m, 1H), 2.34 (s, 3H), 2.26 – 2.12 (m, 1H), 2.03 – 1.88 (m, 1H), 1.60 – 1.47 (m, 2H); <sup>13</sup>C NMR (125 MHz, CDCl<sub>3</sub>) δ 199.0, 144.6, 141.0, 136.3, 136.1(2), 136.0(8), 133.3, 129.9, 129.8, 128.9, 128.3, 126.2, 124.2, 123.5, 119.9, 117.4, 115.6, 69.5, 40.4, 37.7, 35.6, 21.6, 21.3; IR (neat): 2924, 2853, 1774(s),

1612, 1491, 1362, 1170, 1042, 662, 584; HRESIMS Calcd for  $[C_{27}H_{25}NNaO_4S]^+$  ( $M + Na^+$ ) 482.1397, found 482.1396.

**(8*S*,10*S*)-10-(hydroxymethyl)-5-tosyl-5,6,7,8,9,10-hexahydrocyclohepta[*b*]indol-8-ol  
(2ag)**

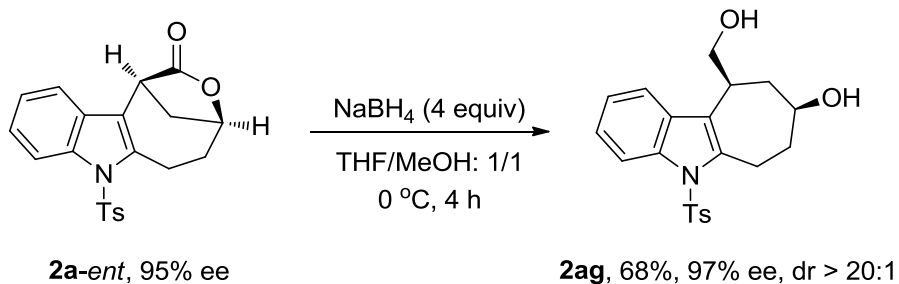

Compound **2ag** was prepared in 68% yield (52.4 mg) according to the above procedure (0.2 mmol scale).  $[\alpha]_D^{20} = -80.5^\circ$  ( $c = 1.0$ , CHCl<sub>3</sub>). 97% ee (determined by HPLC: Chiralcel AD-H Column, 5/95 *i*-PrOH/hexane, 2.0 mL/min, 200 nm; TR = 37.54 min (minor), 40.93 min (major)). Pale yellow oil. <sup>1</sup>H NMR (400 MHz, CDCl<sub>3</sub>)  $\delta$  8.21 (d,  $J = 7.6$  Hz, 1H), 7.56 (d,  $J = 8.4$  Hz, 2H), 7.41 – 7.32 (m, 1H), 7.31 – 7.20 (m, 2H), 7.17 (d,  $J = 8.4$  Hz, 2H), 4.34 – 4.20 (m, 1H), 3.82 (d,  $J = 6.4$  Hz, 2H), 3.47 (s, 1H), 3.41 – 3.27 (m, 2H), 3.24 – 3.09 (m, 1H), 2.38 – 2.22 (m, 4H), 2.06 – 1.92 (m, 2H), 1.91 – 1.75 (m, 2H); <sup>13</sup>C NMR (100 MHz, CDCl<sub>3</sub>)  $\delta$  144.6, 139.3, 136.5, 136.1, 130.3, 129.7, 126.2, 124.2, 123.6, 122.2, 117.7, 115.4, 69.9, 65.1, 36.0, 35.1, 34.0, 21.5, 21.0; IR (neat): 3300, 2933, 1530, 1218, 1175, 580; HRESIMS Calcd for  $[C_{21}H_{23}NNaO_4S]^+$  ( $M + Na^+$ ) 408.1240, found 408.1242.

**(*S*)-(8-oxo-5-tosyl-5,6,7,8,9,10-hexahydrocyclohepta[*b*]indol-10-yl)methyl 4-nitrobenzoate (2ah)** **4-**

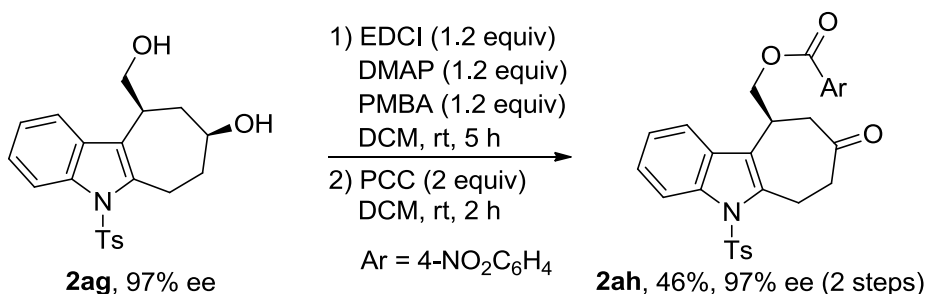

Compound **2ah** was prepared in 46% yield (24.5 mg, 2 steps) according to the above procedure (0.1 mmol scale).  $[\alpha]_D^{20} = -65.5^\circ$  ( $c = 1.0$ ,  $\text{CHCl}_3$ ). 97% ee (determined by HPLC: Chiralcel OD-H Column, 20/80 *i*-PrOH/hexane, 2.0 mL/min, 200 nm; TR = 25.95 min (minor), 31.98 min (major)). Pale yellow solid (mp 201-202 °C).  $^1\text{H}$  NMR (400 MHz,  $\text{CDCl}_3$ )  $\delta$  8.32 – 8.17 (m, 3H), 8.11 – 7.98 (m, 2H), 7.62 – 7.53 (m, 3H), 7.42 – 7.26 (m, 2H), 7.18 (d,  $J = 8.1$  Hz, 2H), 4.67 (dd,  $J = 11.2, 5.6$  Hz, 1H), 4.25 (dd,  $J = 11.2, 8.8$  Hz, 1H), 3.87 – 3.78 (m, 1H), 3.69 – 3.57 (m, 1H), 3.52 – 3.40 (m, 1H), 3.12 – 2.94 (m, 2H), 2.81 – 2.69 (m, 1H), 2.68 – 2.56 (m, 1H), 2.33 (s, 3H);  $^{13}\text{C}$  NMR (100 MHz,  $\text{CDCl}_3$ )  $\delta$  209.5, 164.4, 150.6, 145.1, 137.2, 136.5, 136.0, 135.0, 130.7, 129.9, 129.5, 126.2, 125.1, 123.9, 123.5, 119.1, 118.2, 115.5, 67.1, 43.2(4), 43.1(5), 32.3, 21.6, 21.5; IR (neat): 2933, 1750(s), 1738(s), 1520(s), 1325, 1215, 1120, 586; HRESIMS Calcd for  $[\text{C}_{28}\text{H}_{24}\text{N}_2\text{NaO}_7\text{S}]^+$  ( $\text{M} + \text{Na}^+$ ) 555.1196, found 555.1199.

**methyl 7-methoxy-5-tosyl-5,6,7,8,9,10-hexahydrocyclohepta[b]indole-10-carboxylate (2ai)**

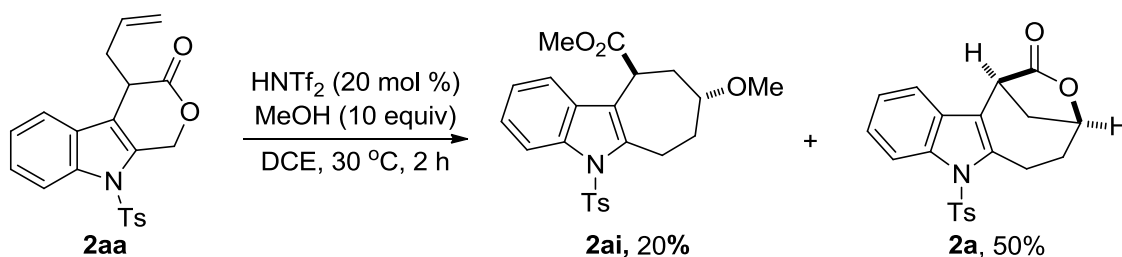

Compound **2ai** was prepared in 20% yield (17.1 mg; d.r. > 20:1) according to the general procedure. Pale yellow oil.  $^1\text{H}$  NMR (400 MHz,  $\text{CDCl}_3$ )  $\delta$  8.22 (dd,  $J = 7.2, 0.8$  Hz, 1H), 7.63 – 7.54 (m, 2H), 7.36 – 7.30 (m, 1H), 7.29 – 7.22 (m, 2H), 7.17 (d,  $J = 8.0$  Hz, 2H), 4.10 (dd,  $J = 5.2, 3.2$  Hz, 1H), 3.67 – 3.61 (m, 4H), 3.59 – 3.50 (m, 1H), 3.38 (s, 3H), 3.02 – 2.91 (m, 1H), 2.74 – 2.62 (m, 1H), 2.34 (s, 3H), 2.17 – 2.06 (m, 1H), 1.72 – 1.58 (m, 2H);  $^{13}\text{C}$  NMR (125 MHz,  $\text{CDCl}_3$ )  $\delta$  172.8, 144.7, 139.7, 136.2, 130.2, 129.8, 126.3, 124.3, 123.6, 119.4, 117.7, 115.3, 78.8, 56.2, 52.1, 37.7, 34.4, 31.2, 21.6, 21.3; IR (neat): 2994, 1769(s), 1758, 1375, 1245, 1056, 913, 743; HRESIMS Calcd for  $[\text{C}_{23}\text{H}_{25}\text{NNaO}_5\text{S}]^+$  ( $\text{M} + \text{Na}^+$ ) 450.1346, found 548.0153.



**7-tosyl-4,5,6,7-tetrahydro-1,4-methanooxocino[5,4-*b*]indol-2(1*H*)-one-5,5-*d*<sub>2</sub> (2a')**

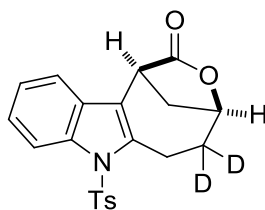

**2a'**

Compound **2a'** was prepared in 74% yield (56.7 mg) according to the general procedure. <sup>1</sup>H NMR (400 MHz, CDCl<sub>3</sub>) δ 8.24 (d, *J* = 8.0 Hz, 1H), 7.55 (d, *J* = 8.4 Hz, 2H), 7.49 – 7.42 (m, 1H), 7.36 – 7.24 (m, 2H), 7.18 (d, *J* = 8.0 Hz, 2H), 5.09 (d, *J* = 8.0 Hz, 1H), 3.94 (d, *J* = 17.2 Hz, 1H), 3.85 (d, *J* = 8.0 Hz, 1H), 2.85 (d, *J* = 17.2 Hz, 1H), 2.78 – 2.65 (m, 1H), 2.33 (s, 3H), 1.88 (d, *J* = 12.4 Hz, 1H); IR (neat): 2922, 1785(s), 1449, 1363, 1274, 1261, 764, 749; HRESIMS Calcd for [C<sub>21</sub>H<sub>17</sub>D<sub>2</sub>NNaO<sub>4</sub>S]<sup>+</sup> (M + Na<sup>+</sup>) 406.1053, found 406.1055.

**7-tosyl-4,5,6,7-tetrahydro-1,4-methanooxocino[5,4-*b*]indol-2(1*H*)-one-4-*d* (2a'')**

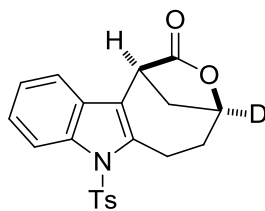

**2a''**

Compound **2a''** was prepared in 72% yield (55.0 mg) according to the general procedure. <sup>1</sup>H NMR (400 MHz, CDCl<sub>3</sub>) δ 8.24 (d, *J* = 7.6 Hz, 1H), 7.55 (d, *J* = 8.4 Hz, 2H), 7.49 – 7.42 (m, 1H), 7.36 – 7.25 (m, 2H), 7.18 (d, *J* = 8.0 Hz, 2H), 5.11 (t, *J* = 7.2 Hz, 0.1H), 3.96 (dt, *J* = 17.2, 4.4 Hz, 1H), 3.85 (d, *J* = 8.0 Hz, 1H), 2.95 – 2.79 (m, 1H), 2.77 – 2.65 (m, 1H), 2.47 – 2.36 (m, 1H), 2.33 (s, 3H), 1.88 (d, *J* = 12.0 Hz, 1H), 1.85 – 1.76 (m, 1H); IR (neat): 2922, 2851, 1773(s), 1449, 1363, 1275, 1171, 763, 749; HRESIMS Calcd for [C<sub>21</sub>H<sub>18</sub>DNNaO<sub>4</sub>S]<sup>+</sup> (M + Na<sup>+</sup>) 405.0990, found 405.0996.

**1-allyl-6-tosyl-1,4,5,6-tetrahydro-2*H*-oxepino[4,5-*b*]indol-2-one (4ga)**

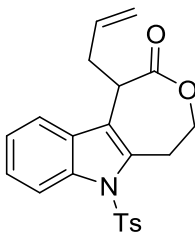

**4ga**

Compound **4ga** was prepared in 42% yield (33.2 mg) according to the general procedure. Pale yellow oil.  $^1\text{H}$  NMR (400 MHz,  $\text{CDCl}_3$ )  $\delta$  8.21 (dd,  $J = 8.0, 0.8$  Hz, 1H), 7.60 (d,  $J = 8.4$ , 2H), 7.40 – 7.31 (m, 2H), 7.29 (dd,  $J = 7.6, 1.2$  Hz, 1H), 7.20 (d,  $J = 8.0$ , 2H), 6.00 – 5.80 (m, 1H), 5.24 – 5.07 (m, 2H), 4.85 (td,  $J = 12.8, 1.6$  Hz, 1H), 4.53 (dt,  $J = 12.8, 4.0$  Hz, 1H), 4.30 (dd,  $J = 9.6, 6.4$  Hz, 1H), 3.66 (dd,  $J = 18.8, 2.0$  Hz, 1H), 3.43 – 3.25 (m, 1H), 2.87 – 2.62 (m, 2H), 2.35 (s, 3H);  $^{13}\text{C}$  NMR (100 MHz,  $\text{CDCl}_3$ )  $\delta$  171.9, 145.3, 136.4, 135.6, 133.8, 133.6, 130.1, 128.9, 126.3, 125.2, 123.8, 118.4, 118.1, 115.6, 114.8, 64.5, 45.2, 38.9, 29.3, 21.5; IR (neat): 2924, 1732(s), 1454, 1358, 1173, 1151, 1089, 575; HRESIMS Calcd for  $[\text{C}_{22}\text{H}_{21}\text{NNaO}_4\text{S}]^+$  ( $\text{M} + \text{Na}^+$ ) 418.1083, found 418.1083.

#### 4-allylisochroman-3-one (4ha)

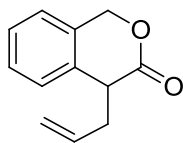

**4ha**

Compound **4ha** was prepared in 85% yield (32.0 mg) according to the general procedure. Pale yellow oil.  $^1\text{H}$  NMR (400 MHz,  $\text{CDCl}_3$ )  $\delta$  7.38 – 7.20 (m, 4H), 5.93 – 5.81 (m, 1H), 5.41 (d, 1H,  $J = 14.0$  Hz), 5.28 (d, 1H,  $J = 14.0$  Hz), 5.17 – 5.09 (m, 2H), 3.70 (t, 1H,  $J = 6.8$  Hz), 2.87 – 2.66 (m, 2H);  $^{13}\text{C}$  NMR (100 MHz,  $\text{CDCl}_3$ )  $\delta$  172.2, 134.2, 134.0, 131.4, 128.6, 127.2, 126.6, 124.6, 118.1, 69.5, 45.3, 34.2; IR (neat): 3076, 2924, 1744 (s), 1641, 1489, 1462, 1385, 1234, 1146, 1047, 913, 747; HRESIMS Calcd for  $[\text{C}_{12}\text{H}_{12}\text{NaO}_2]^+$  ( $\text{M} + \text{Na}^+$ ) 211.0730, found 211.0732.

#### Reference:

1. a) J. Zheng, Z. Li, W. Wu, H. Jiang, *Org. Lett.* **2016**, *18*, 6232; b) A. Arcadi, G. Bianchi, F. Marinelli, *Synthesis* **2004**, *4*, 610.
2. a) C. Shu, L. Li, X.-Y. Xiao, Y.-F. Yu, Y.-F. Ping, J.-M. Zhou, L.-W. Ye, *Chem. Commun.* **2014**, *50*, 8689; b) F. Pan, S. Liu, C. Shu, R.-K. Lin, Y.-F. Yu, J.-M. Zhou, L.-W. Ye, *Chem. Commun.* **2014**, *50*, 10726; c) N. S. Kumar, E. M. Dullaghan, B. B. Finlay, H. Gong, N. E. Reiner, J. J. P. Selvam, L. M. Thorson, S. Campbell, N. Vitko, A. R. Richardson, R. Zoraghi, R. N. Young, *Bioorg. Med. Chem.* **2014**, *22*, 1708; d) M. Yu, Y. Xie, C. Xie, Y. Zhang, *Org. Lett.* **2012**, *14*, 2164; e) M. Garzon, P. W. Davies, *Org. Lett.* **2014**, *16*, 4850; f) Y. Pan, G.-W. Chen, C.-H. Shen, W. He, L.-W. Ye, *Org. Chem. Front.* **2016**, *3*, 491.
3. a) X. Wu, Z. Chen, Y.-B. Bai, V. M. Dong, *J. Am. Chem. Soc.* **2016**, *138*, 12013; b) L.-L. Mao, C.-C. Li, Q. Yang, M.-X. Cheng, S.-D. Yang, *Chem. Commun.* **2017**, *53*, 4473; c) S. Hirano, R. Tanaka, H. Urabe, F. Sato, *Org. Lett.* **2004**, *6*, 727; d) C. Gryparis, C. Efe, C. Raptis, I. N. Lykakis, M. Stratakis, *Org. Lett.* **2012**, *14*, 2956.
4. J. Liu, Z. Fang, Q. Zhang, Q. Liu, X. Bi, *Angew. Chem. Int. Ed.* **2013**, *52*, 6953.
5. C. Zheng, J. J. Chen, R. Fan, *Org. Lett.* **2014**, *16*, 816.
6. K. Miyashita, T. Tsunemi, T. Hosokawa, M. Ikejiri, T. Imanishi, *J. Org. Chem.* **2008**, *73*, 5360.
7. N. Sakai, T. Moriya, K. Fujii, T. Konakahara, *Synthesis* **2008**, *21*, 3533.
8. L. Li, X.-M. Chen, Z.-S. Wang, B. Zhou, X. Liu, X. Lu, L.-W. Ye, *ACS Catal.* **2017**, *7*, 4004.

**7-tosyl-4,5,6,7-tetrahydro-1,4-methanooxocino[5,4-*b*]indol-2(1*H*)-one (2a). CCDC  
Number = 1831051**

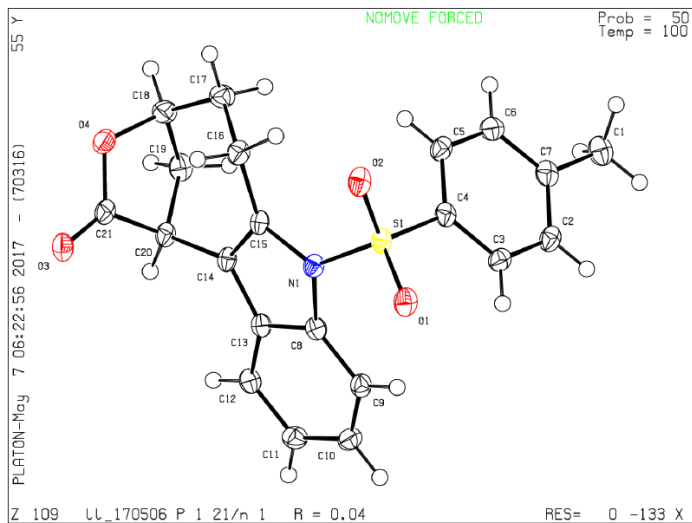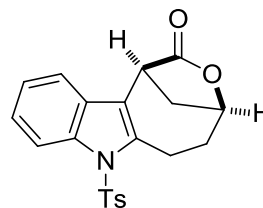

Bond precision: C-C = 0.0020 Å

Wavelength=1.54184

Cell: a=9.07481(16) b=15.0220(2) c=12.7620(2)  
alpha=90 beta=99.1959(16) gamma=90  
Temperature: 100 K

|                        | Calculated                                         | Reported                                           |
|------------------------|----------------------------------------------------|----------------------------------------------------|
| Volume                 | 1717.38(5)                                         | 1717.38(5)                                         |
| Space group            | P 21/n                                             | P 21/n 1                                           |
| Hall group             | -P 2yn                                             | -P 2yn                                             |
| Moiety formula         | C <sub>21</sub> H <sub>19</sub> N O <sub>4</sub> S | C <sub>21</sub> H <sub>19</sub> N O <sub>4</sub> S |
| Sum formula            | C <sub>21</sub> H <sub>19</sub> N O <sub>4</sub> S | C <sub>21</sub> H <sub>19</sub> N O <sub>4</sub> S |
| Mr                     | 381.43                                             | 381.43                                             |
| Dx, g cm <sup>-3</sup> | 1.475                                              | 1.475                                              |
| Z                      | 4                                                  | 4                                                  |
| Mu (mm <sup>-1</sup> ) | 1.924                                              | 1.924                                              |
| F <sub>000</sub>       | 800.0                                              | 800.0                                              |
| F <sub>000</sub> '     | 803.67                                             |                                                    |
| h,k,lmax               | 10,17,15                                           | 10,17,15                                           |
| Nref                   | 3062                                               | 3057                                               |
| Tmin, Tmax             | 0.794, 0.825                                       | 0.567, 1.000                                       |
| Tmin'                  | 0.749                                              |                                                    |

Correction method= # Reported T Limits: Tmin=0.567 Tmax=1.000  
AbsCorr = MULTI-SCAN

Data completeness= 0.998

Theta(max)= 67.074

R(reflections)= 0.0396( 2966)

wR2(reflections)= 0.1068( 3057)

S = 1.024

Npar= 245

**5-methyl-7-tosyl-4,5,6,7-tetrahydro-1,4-methanooxocino[5,4-*b*]indol-2(1*H*)-one (2s).**

**CCDC Number = 1831053**

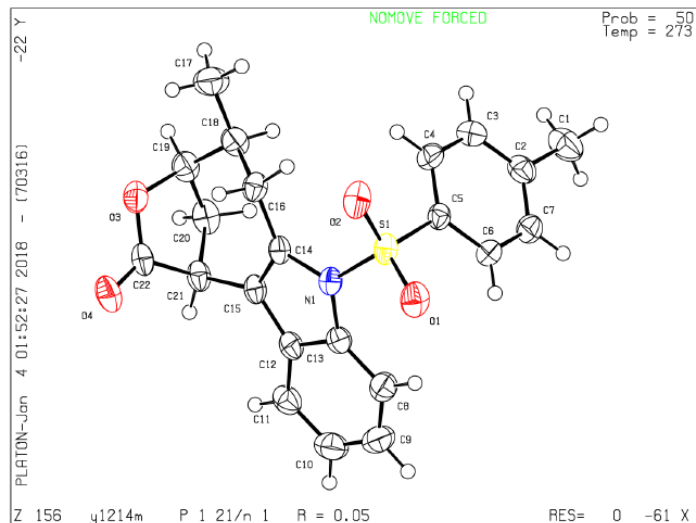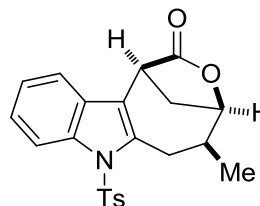

Bond precision: C-C = 0.0030 Å

Wavelength=0.71073

Cell: a=13.780 (3)

b=9.3801 (19)

c=14.410 (3)

alpha=90

beta=92.893 (4)

gamma=90

Temperature: 273 K

|                        | Calculated     | Reported       |
|------------------------|----------------|----------------|
| Volume                 | 1860.2 (7)     | 1860.2 (6)     |
| Space group            | P 21/n         | P 21/n 1       |
| Hall group             | -P 2yn         | -P 2yn         |
| Moiety formula         | C22 H21 N O4 S | C22 H21 N O4 S |
| Sum formula            | C22 H21 N O4 S | C22 H21 N O4 S |
| Mr                     | 395.46         | 395.46         |
| Dx, g cm <sup>-3</sup> | 1.412          | 1.412          |
| Z                      | 4              | 4              |
| Mu (mm <sup>-1</sup> ) | 0.204          | 0.204          |
| F000                   | 832.0          | 832.0          |
| F000'                  | 832.88         |                |
| h, k, lmax             | 17, 12, 18     | 17, 12, 18     |
| Nref                   | 4265           | 4240           |
| Tmin, Tmax             | 0.980, 0.980   |                |
| Tmin'                  | 0.980          |                |

Correction method= Not given

Data completeness= 0.994

Theta (max)= 27.485

R(reflections)= 0.0530 ( 3644)

wR2(reflections)= 0.1365 ( 4240)

S = 1.070

Npar= 255

**9-methyl-4-phenyl-7-tosyl-4,5,6,7-tetrahydro-1,4-methanooxocino[5,4-*b*]indol-2(1*H*)-one (2u). CCDC Number = 1831054**

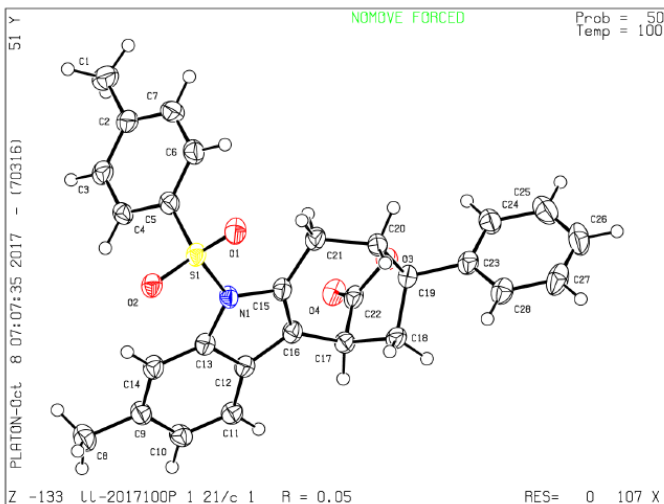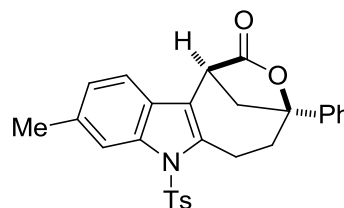

Bond precision: C-C = 0.0041 Å

Wavelength=1.54184

Cell: a=12.3488(2) b=9.82302(14) c=19.2566(4)  
 alpha=90 beta=108.549(2) gamma=90  
 Temperature: 100 K

|                        | Calculated                                         | Reported                                           |
|------------------------|----------------------------------------------------|----------------------------------------------------|
| Volume                 | 2214.53 (7)                                        | 2214.53 (8)                                        |
| Space group            | P 21/c                                             | P 1 21/c 1                                         |
| Hall group             | -P 2ybc                                            | -P 2ybc                                            |
| Moiety formula         | C <sub>28</sub> H <sub>25</sub> N O <sub>4</sub> S | C <sub>28</sub> H <sub>25</sub> N O <sub>4</sub> S |
| Sum formula            | C <sub>28</sub> H <sub>25</sub> N O <sub>4</sub> S | C <sub>28</sub> H <sub>25</sub> N O <sub>4</sub> S |
| Mr                     | 471.55                                             | 471.55                                             |
| Dx, g cm <sup>-3</sup> | 1.414                                              | 1.414                                              |
| Z                      | 4                                                  | 4                                                  |
| Mu (mm <sup>-1</sup> ) | 1.606                                              | 1.606                                              |
| F000                   | 992.0                                              | 992.0                                              |
| F000'                  | 996.15                                             |                                                    |
| h, k, lmax             | 14, 11, 22                                         | 14, 11, 21                                         |
| Nref                   | 3907                                               | 3742                                               |
| Tmin, Tmax             | 0.825, 0.852                                       | 0.744, 1.000                                       |
| Tmin'                  | 0.725                                              |                                                    |

Correction method= # Reported T Limits: Tmin=0.744 Tmax=1.000  
 AbsCorr = MULTI-SCAN

Data completeness= 0.958

Theta(max)= 66.583

R(reflections)= 0.0479( 3502)

wR2(reflections)= 0.1277( 3742)

S = 1.156

Npar= 309

**(S)-(8-oxo-5-tosyl-5,6,7,8,9,10-hexahydrocyclohepta[b]indol-10-yl)methyl  
nitrobenzoate (2ah). CCDC Number = 1864037**

4-

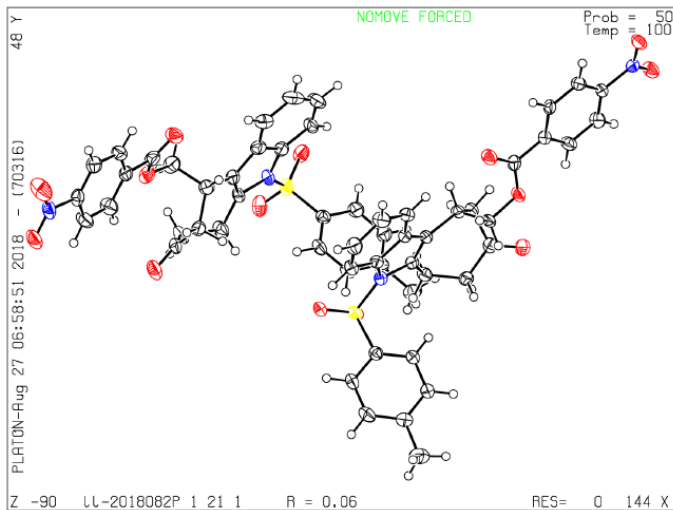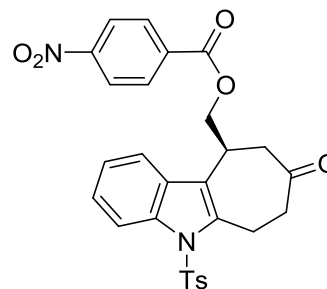

Bond precision: C-C = 0.0080 Å

Wavelength=1.54184

Cell: a=9.68936 (19) b=16.6569 (4) c=15.2343 (3)  
 alpha=90 beta=94.933 (2) gamma=90  
 Temperature: 100 K

|                        | Calculated                                                      | Reported                                                        |
|------------------------|-----------------------------------------------------------------|-----------------------------------------------------------------|
| Volume                 | 2449.63 (9)                                                     | 2449.63 (9)                                                     |
| Space group            | P 21                                                            | P 1 21 1                                                        |
| Hall group             | P 2yb                                                           | P 2yb                                                           |
| Moiety formula         | C <sub>28</sub> H <sub>24</sub> N <sub>2</sub> O <sub>7</sub> S | C <sub>28</sub> H <sub>24</sub> N <sub>2</sub> O <sub>7</sub> S |
| Sum formula            | C <sub>28</sub> H <sub>24</sub> N <sub>2</sub> O <sub>7</sub> S | C <sub>28</sub> H <sub>24</sub> N <sub>2</sub> O <sub>7</sub> S |
| Mr                     | 532.55                                                          | 532.55                                                          |
| Dx, g cm <sup>-3</sup> | 1.444                                                           | 1.444                                                           |
| Z                      | 4                                                               | 4                                                               |
| Mu (mm <sup>-1</sup> ) | 1.629                                                           | 1.629                                                           |
| F000                   | 1112.0                                                          | 1112.0                                                          |
| F000'                  | 1116.84                                                         |                                                                 |
| h, k, lmax             | 11, 19, 18                                                      | 11, 19, 18                                                      |
| Nref                   | 8746 [ 4539]                                                    | 6188                                                            |
| Tmin, Tmax             |                                                                 | 0.532, 1.000                                                    |
| Tmin'                  |                                                                 |                                                                 |

Correction method= # Reported T Limits: Tmin=0.532 Tmax=1.000  
 AbsCorr = MULTI-SCAN

Data completeness= 1.36/0.71 Theta (max)= 67.079

R(reflections)= 0.0570 ( 5742) wR2(reflections)= 0.1593 ( 6188)

S = 1.026 Npar= 687

# Compound 2a-ent

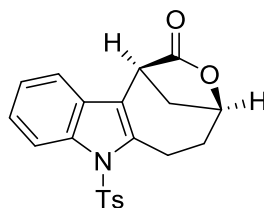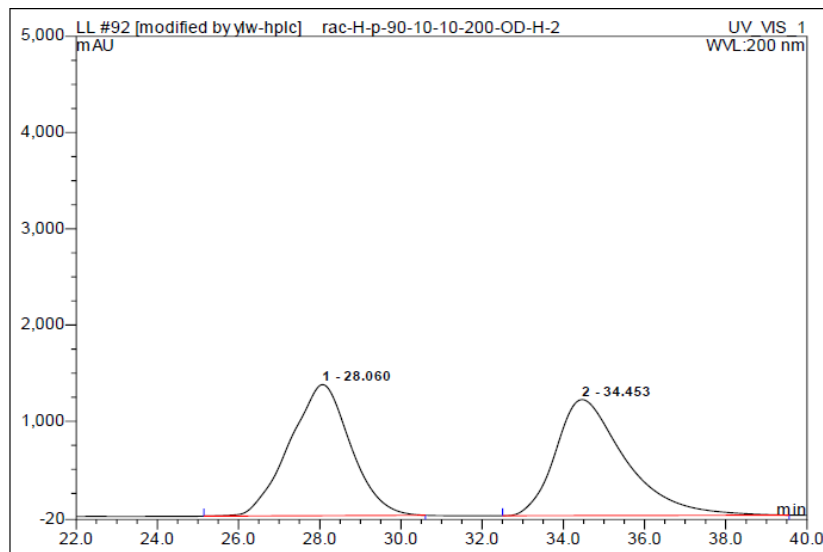

| No.           | Ret.Time min | Peak Name | Height mAU | Area mAU*min | Rel.Area % | Amount n.a. | Type |
|---------------|--------------|-----------|------------|--------------|------------|-------------|------|
| 1             | 28.06        | n.a.      | 1361.953   | 2376.246     | 49.84      | n.a.        | BMB* |
| 2             | 34.45        | n.a.      | 1204.479   | 2391.764     | 50.16      | n.a.        | BMB* |
| <b>Total:</b> |              |           | 2566.432   | 4768.011     | 100.00     | 0.000       |      |

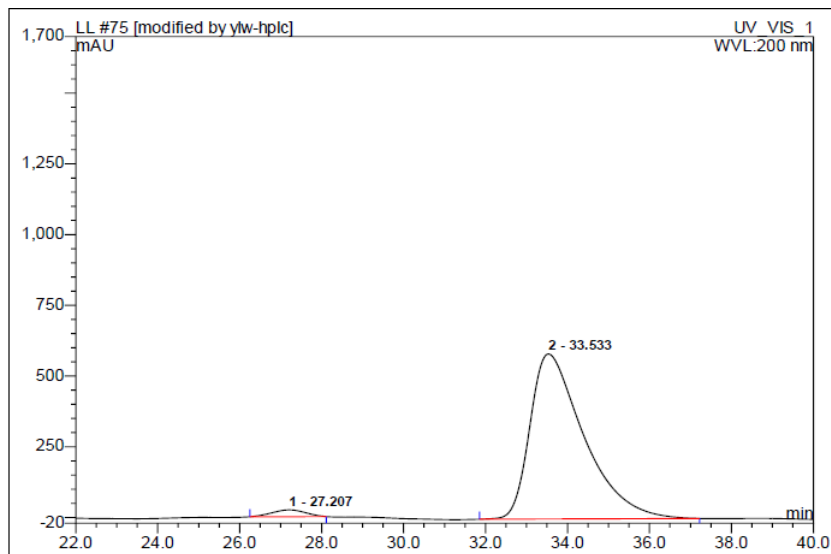

| No.           | Ret.Time min | Peak Name | Height mAU | Area mAU*min | Rel.Area % | Amount n.a. | Type |
|---------------|--------------|-----------|------------|--------------|------------|-------------|------|
| 1             | 27.21        | n.a.      | 23.780     | 22.429       | 2.46       | n.a.        | BMB* |
| 2             | 33.53        | n.a.      | 583.165    | 888.492      | 97.54      | n.a.        | BMB* |
| <b>Total:</b> |              |           | 606.945    | 910.921      | 100.00     | 0.000       |      |



# Compound 2b-ent

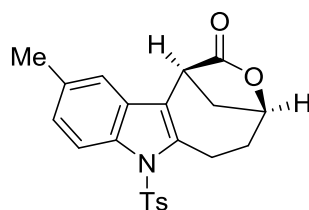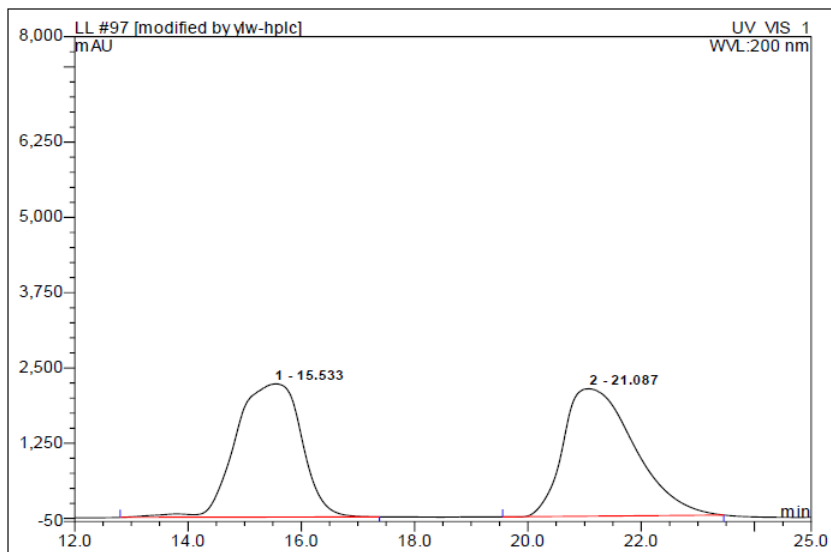

| No.           | Ret.Time<br>min | Peak Name | Height<br>mAU | Area<br>mAU*min | Rel.Area<br>% | Amount<br>n.a. | Type |
|---------------|-----------------|-----------|---------------|-----------------|---------------|----------------|------|
| 1             | 15.53           | n.a.      | 2214.198      | 2969.358        | 49.14         | n.a.           | BMB* |
| 2             | 21.09           | n.a.      | 2117.625      | 3073.717        | 50.86         | n.a.           | BMB* |
| <b>Total:</b> |                 |           | 4331.823      | 6043.075        | 100.00        | 0.000          |      |

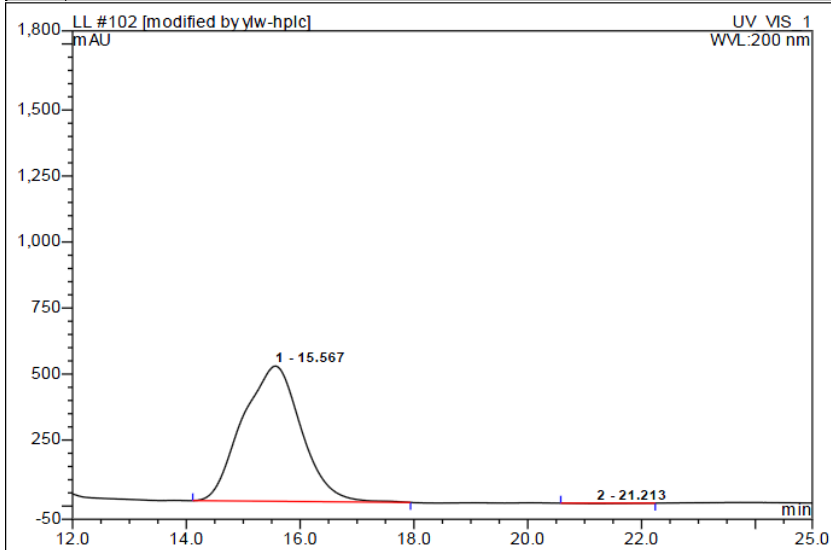

| No.           | Ret.Time<br>min | Peak Name | Height<br>mAU | Area<br>mAU*min | Rel.Area<br>% | Amount<br>n.a. | Type |
|---------------|-----------------|-----------|---------------|-----------------|---------------|----------------|------|
| 1             | 15.57           | n.a.      | 511.996       | 613.674         | 99.75         | n.a.           | BMB* |
| 2             | 21.21           | n.a.      | 1.606         | 1.507           | 0.25          | n.a.           | BMB* |
| <b>Total:</b> |                 |           | 513.602       | 615.181         | 100.00        | 0.000          |      |

# Compound 2e-ent

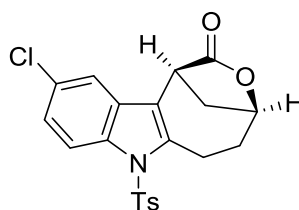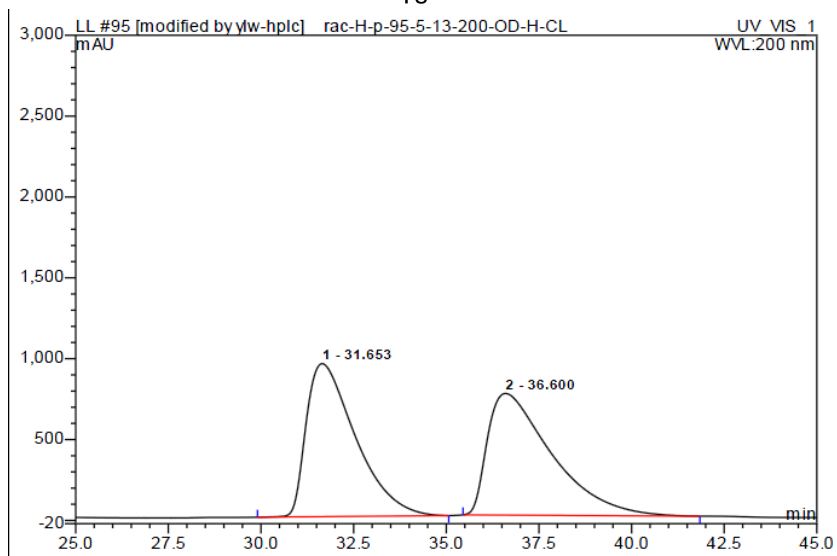

| No.           | Ret.Time<br>min | Peak Name | Height<br>mAU | Area<br>mAU*min | Rel.Area<br>% | Amount<br>n.a. | Type |
|---------------|-----------------|-----------|---------------|-----------------|---------------|----------------|------|
| 1             | 31.65           | n.a.      | 945.708       | 1459.033        | 49.18         | n.a.           | BMB* |
| 2             | 36.60           | n.a.      | 751.863       | 1507.930        | 50.82         | n.a.           | BMB* |
| <b>Total:</b> |                 |           | 1697.571      | 2966.963        | 100.00        | 0.000          |      |

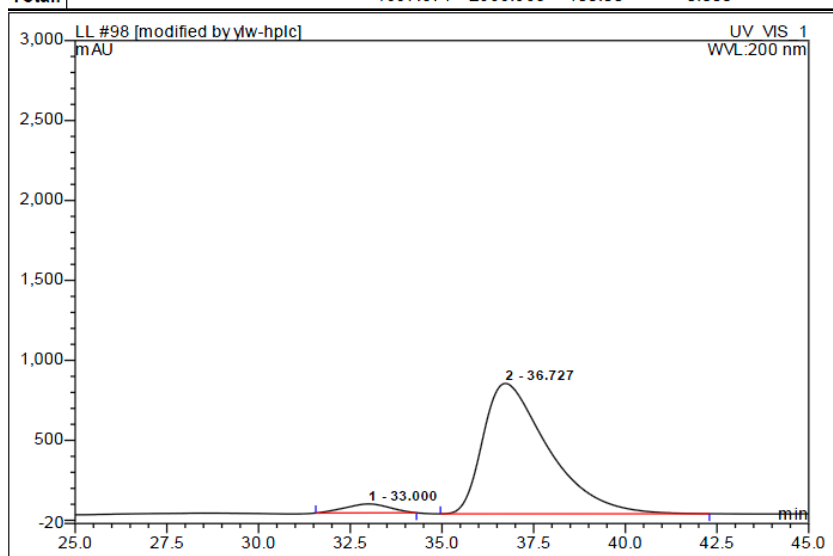

| No.           | Ret.Time<br>min | Peak Name | Height<br>mAU | Area<br>mAU*min | Rel.Area<br>% | Amount<br>n.a. | Type |
|---------------|-----------------|-----------|---------------|-----------------|---------------|----------------|------|
| 1             | 33.00           | n.a.      | 55.668        | 78.538          | 4.45          | n.a.           | BMB* |
| 2             | 36.73           | n.a.      | 814.805       | 1686.126        | 95.55         | n.a.           | BMB* |
| <b>Total:</b> |                 |           | 870.473       | 1764.664        | 100.00        | 0.000          |      |

**Compound 2f-ent**

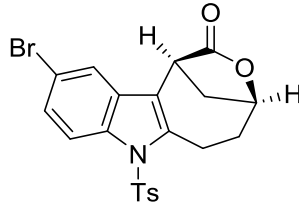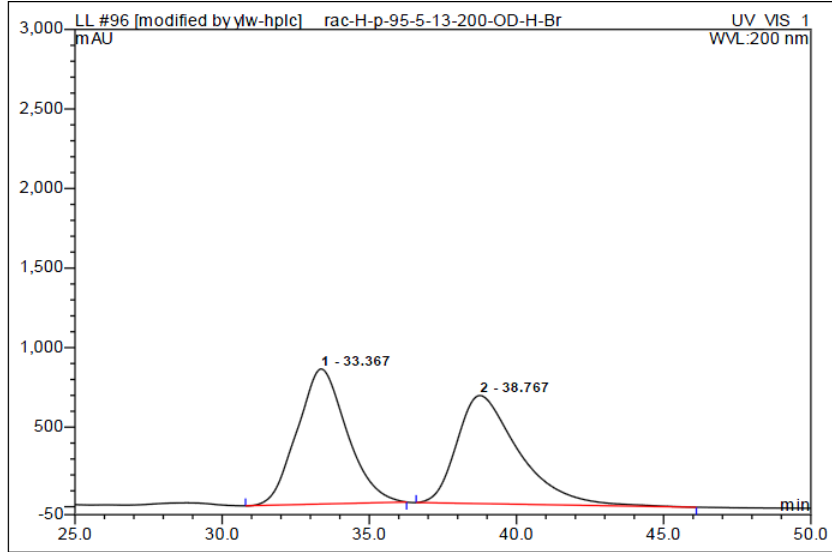

| No.           | Ret.Time<br>min | Peak Name | Height<br>mAU | Area<br>mAU*min | Rel.Area<br>% | Amount<br>n.a. | Type |
|---------------|-----------------|-----------|---------------|-----------------|---------------|----------------|------|
| 1             | 33.37           | n.a.      | 848.367       | 1662.175        | 50.17         | n.a.           | BMB* |
| 2             | 38.77           | n.a.      | 678.954       | 1650.623        | 49.83         | n.a.           | BMB* |
| <b>Total:</b> |                 |           | 1527.320      | 3312.798        | 100.00        | 0.000          |      |

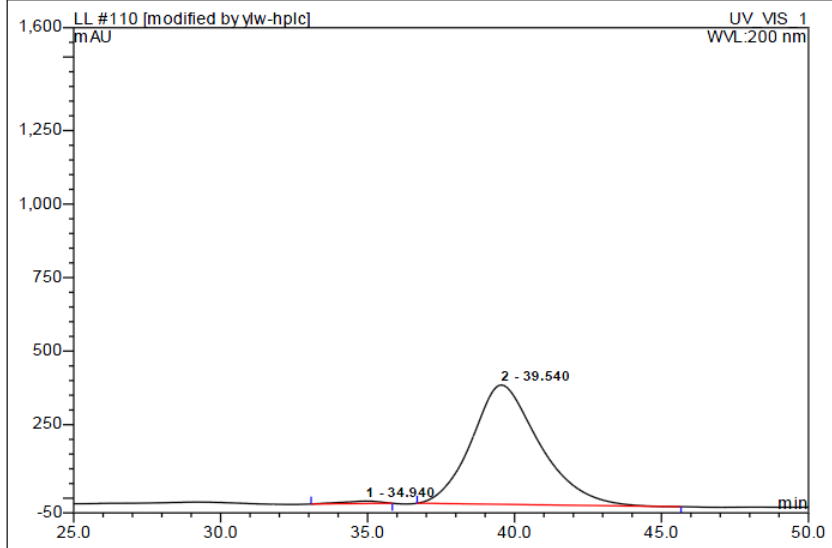

| No.           | Ret.Time<br>min | Peak Name | Height<br>mAU | Area<br>mAU*min | Rel.Area<br>% | Amount<br>n.a. | Type |
|---------------|-----------------|-----------|---------------|-----------------|---------------|----------------|------|
| 1             | 34.94           | n.a.      | 8.311         | 12.311          | 1.12          | n.a.           | BMB* |
| 2             | 39.54           | n.a.      | 405.541       | 1086.257        | 98.88         | n.a.           | BMB* |
| <b>Total:</b> |                 |           | 413.852       | 1098.568        | 100.00        | 0.000          |      |

## Compound 2i-ent

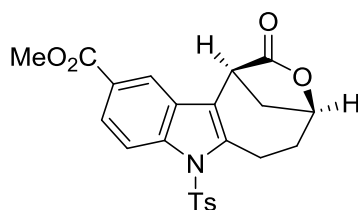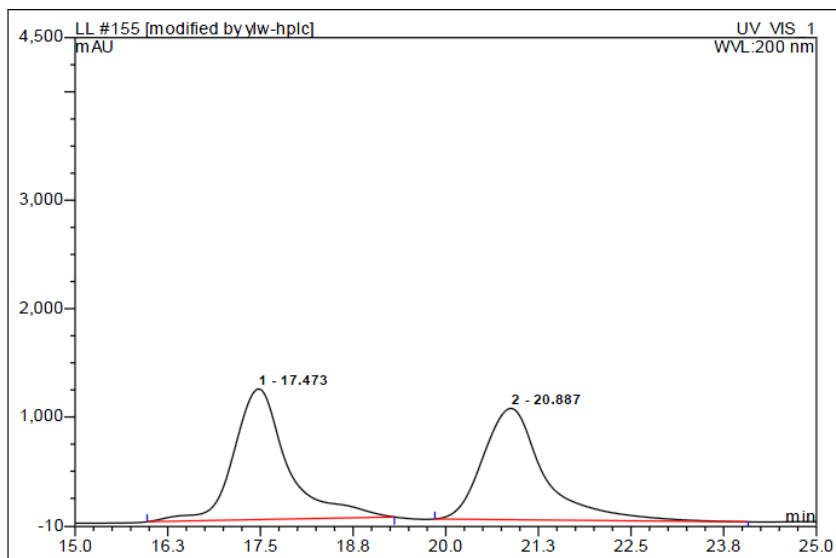

| No.           | Ret.Time<br>min | Peak Name | Height<br>mAU | Area<br>mAU*min | Rel.Area<br>% | Amount<br>n.a. | Type |
|---------------|-----------------|-----------|---------------|-----------------|---------------|----------------|------|
| 1             | 17.47           | n.a.      | 1203.992      | 1018.388        | 50.96         | n.a.           | BMB* |
| 2             | 20.89           | n.a.      | 1025.920      | 979.895         | 49.04         | n.a.           | BMB* |
| <b>Total:</b> |                 |           | 2229.912      | 1998.283        | 100.00        | 0.000          |      |

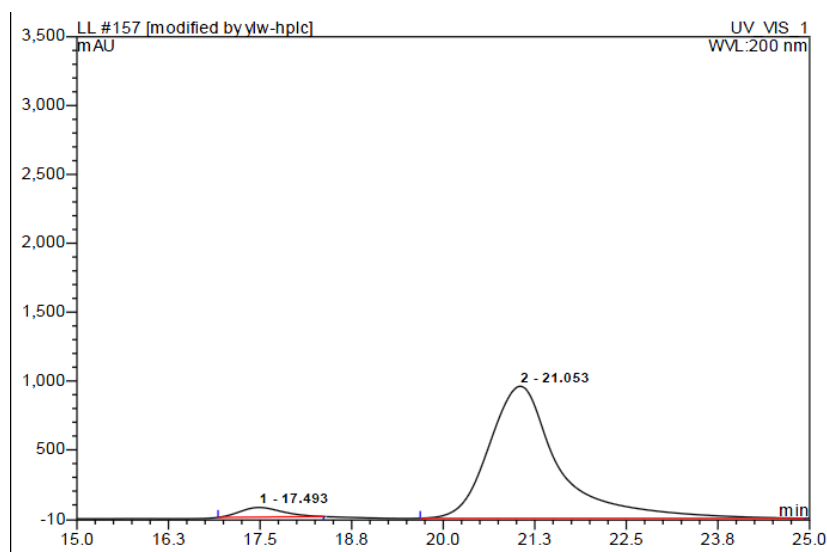

| No.           | Ret.Time<br>min | Peak Name | Height<br>mAU | Area<br>mAU*min | Rel.Area<br>% | Amount<br>n.a. | Type |
|---------------|-----------------|-----------|---------------|-----------------|---------------|----------------|------|
| 1             | 17.49           | n.a.      | 69.773        | 46.415          | 4.22          | n.a.           | BMB* |
| 2             | 21.05           | n.a.      | 958.266       | 1053.332        | 95.78         | n.a.           | BMB* |
| <b>Total:</b> |                 |           | 1028.039      | 1099.746        | 100.00        | 0.000          |      |

# Compound 2j-ent

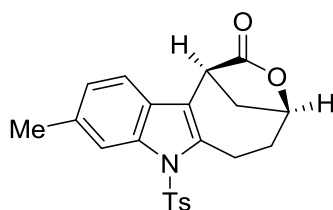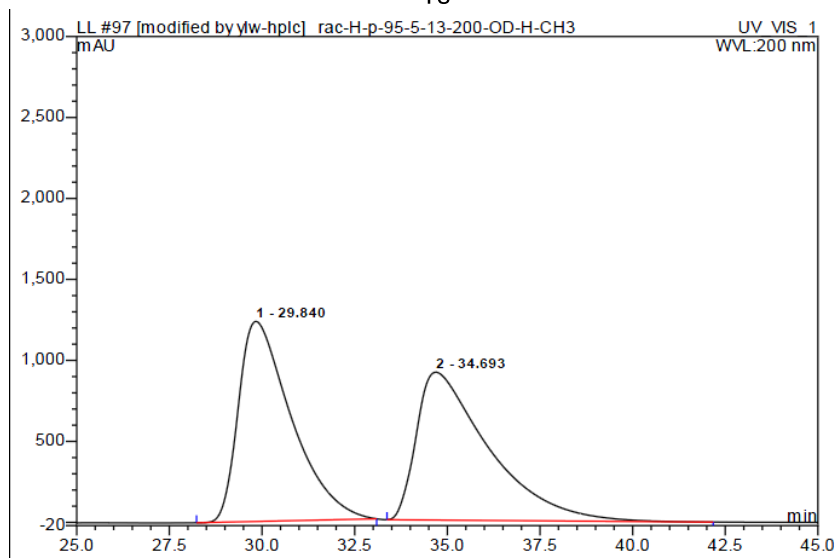

| No.           | Ret.Time<br>min | Peak Name | Height<br>mAU | Area<br>mAU*min | Rel.Area<br>% | Amount<br>n.a. | Type |
|---------------|-----------------|-----------|---------------|-----------------|---------------|----------------|------|
| 1             | 29.84           | n.a.      | 1234.562      | 2044.940        | 49.83         | n.a.           | BMB* |
| 2             | 34.69           | n.a.      | 912.649       | 2058.774        | 50.17         | n.a.           | BMB* |
| <b>Total:</b> |                 |           | 2147.211      | 4103.713        | 100.00        | 0.000          |      |

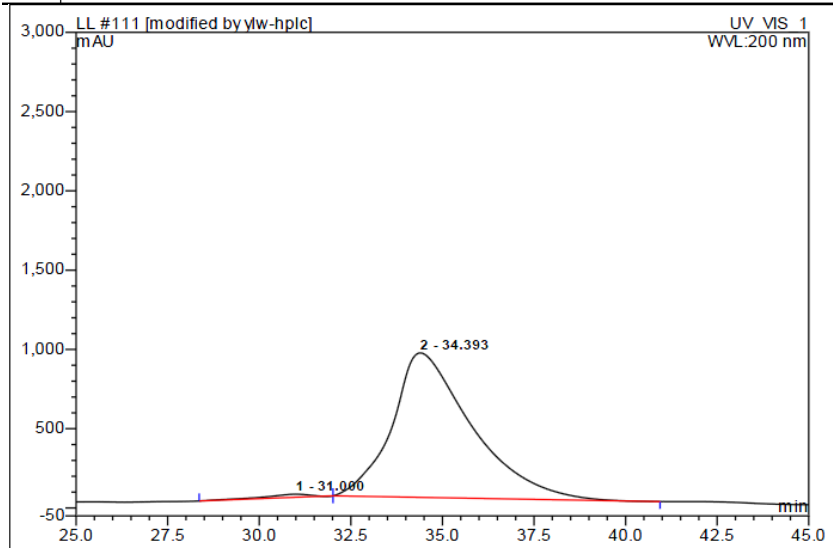

| No.           | Ret.Time<br>min | Peak Name | Height<br>mAU | Area<br>mAU*min | Rel.Area<br>% | Amount<br>n.a. | Type |
|---------------|-----------------|-----------|---------------|-----------------|---------------|----------------|------|
| 1             | 31.00           | n.a.      | 19.113        | 27.169          | 1.16          | n.a.           | BMB* |
| 2             | 34.39           | n.a.      | 910.741       | 2305.936        | 98.84         | n.a.           | bMB* |
| <b>Total:</b> |                 |           | 929.855       | 2333.105        | 100.00        | 0.000          |      |

# Compound 2a-ent'

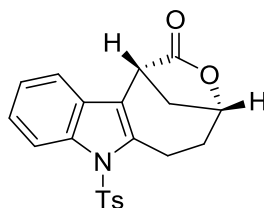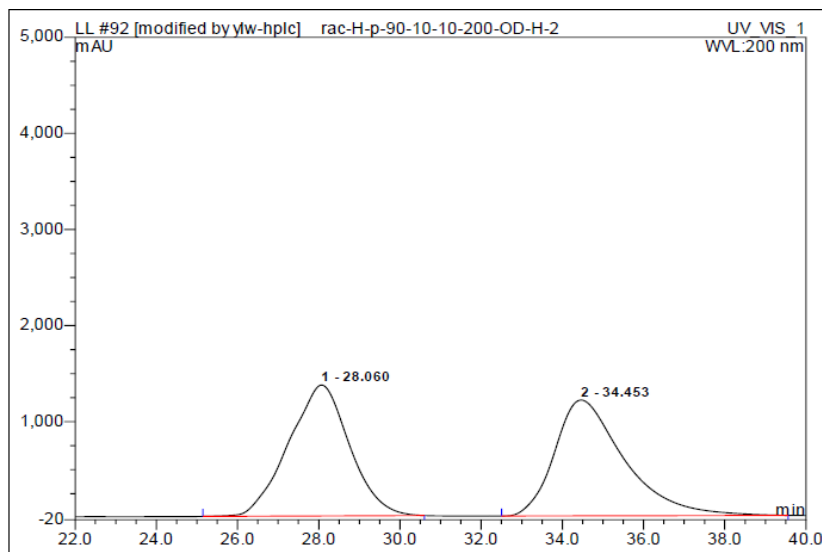

| No.           | Ret.Time min | Peak Name | Height mAU | Area mAU*min | Rel.Area % | Amount n.a. | Type |
|---------------|--------------|-----------|------------|--------------|------------|-------------|------|
| 1             | 28.06        | n.a.      | 1361.953   | 2376.246     | 49.84      | n.a.        | BMB* |
| 2             | 34.45        | n.a.      | 1204.479   | 2391.764     | 50.16      | n.a.        | BMB* |
| <b>Total:</b> |              |           | 2566.432   | 4768.011     | 100.00     | 0.000       |      |

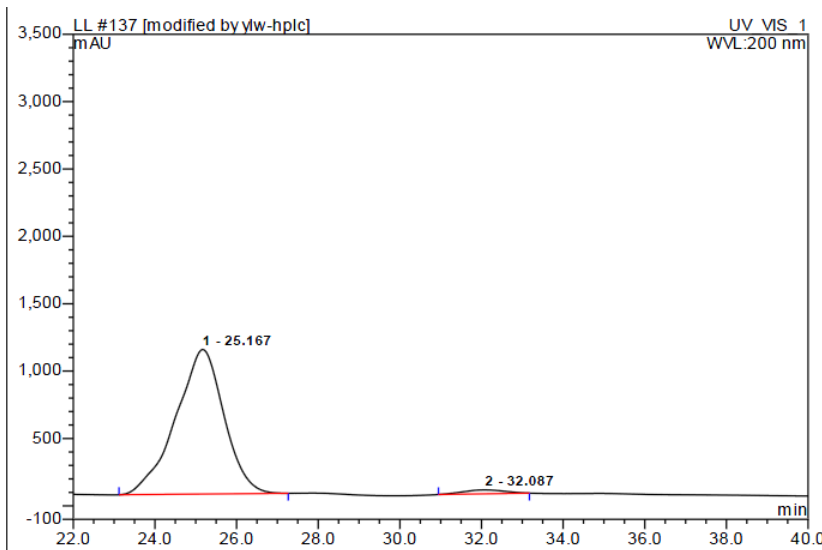

| No.           | Ret.Time min | Peak Name | Height mAU | Area mAU*min | Rel.Area % | Amount n.a. | Type |
|---------------|--------------|-----------|------------|--------------|------------|-------------|------|
| 1             | 25.17        | n.a.      | 1072.451   | 1471.426     | 97.73      | n.a.        | BMB* |
| 2             | 32.09        | n.a.      | 29.144     | 34.154       | 2.27       | n.a.        | BMB* |
| <b>Total:</b> |              |           | 1101.595   | 1505.580     | 100.00     | 0.000       |      |

# Compound 2ag

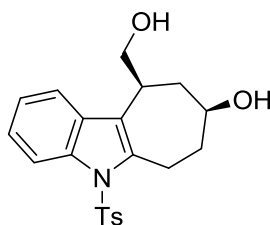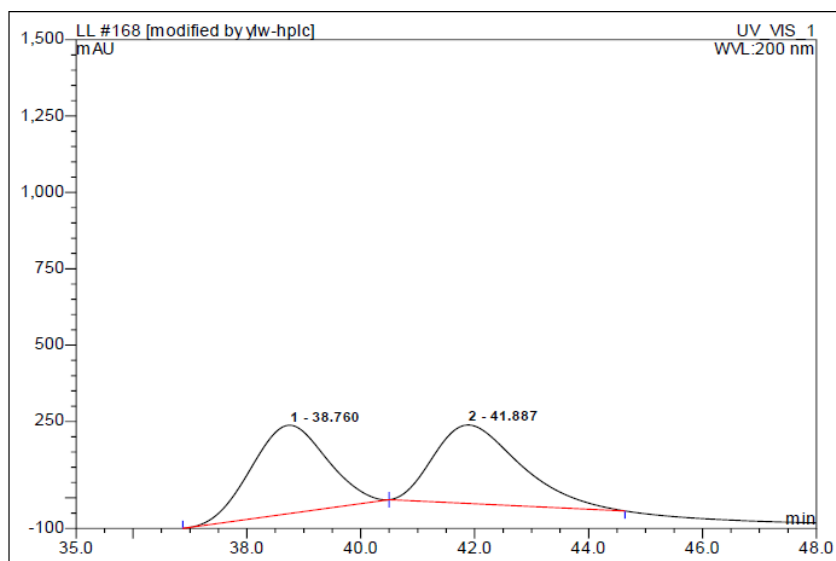

| No.           | Ret.Time min | Peak Name | Height mAU | Area mAU*min | Rel.Area % | Amount n.a. | Type |
|---------------|--------------|-----------|------------|--------------|------------|-------------|------|
| 1             | 38.76        | n.a.      | 288.746    | 444.091      | 49.57      | n.a.        | BMB* |
| 2             | 41.89        | n.a.      | 256.810    | 451.833      | 50.43      | n.a.        | bMB* |
| <b>Total:</b> |              |           | 545.556    | 895.924      | 100.00     | 0.000       |      |

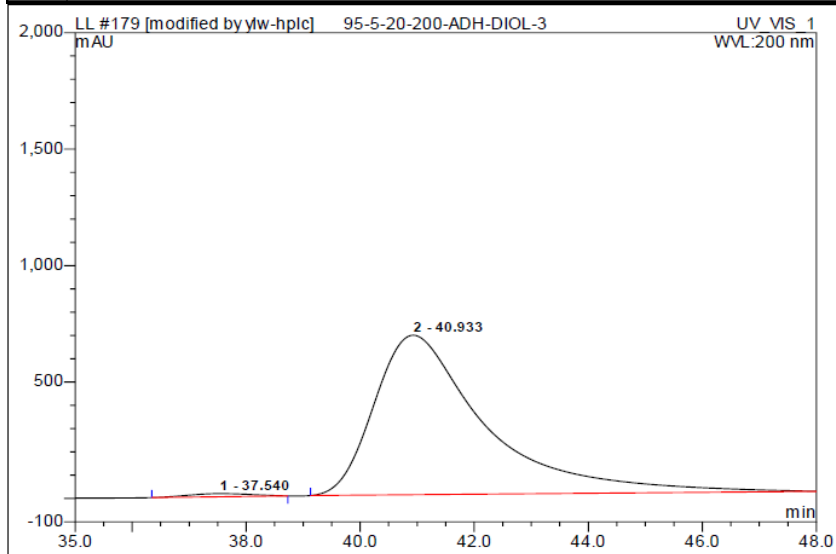

| No.           | Ret.Time min | Peak Name | Height mAU | Area mAU*min | Rel.Area % | Amount n.a. | Type |
|---------------|--------------|-----------|------------|--------------|------------|-------------|------|
| 1             | 37.54        | n.a.      | 13.595     | 17.382       | 1.11       | n.a.        | BMB* |
| 2             | 40.93        | n.a.      | 684.641    | 1545.118     | 98.89      | n.a.        | BMB* |
| <b>Total:</b> |              |           | 698.237    | 1562.500     | 100.00     | 0.000       |      |

# Compound 2ah

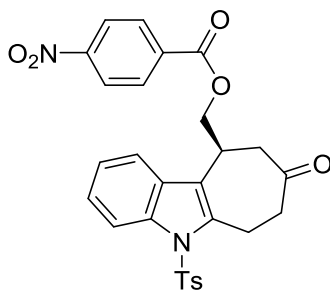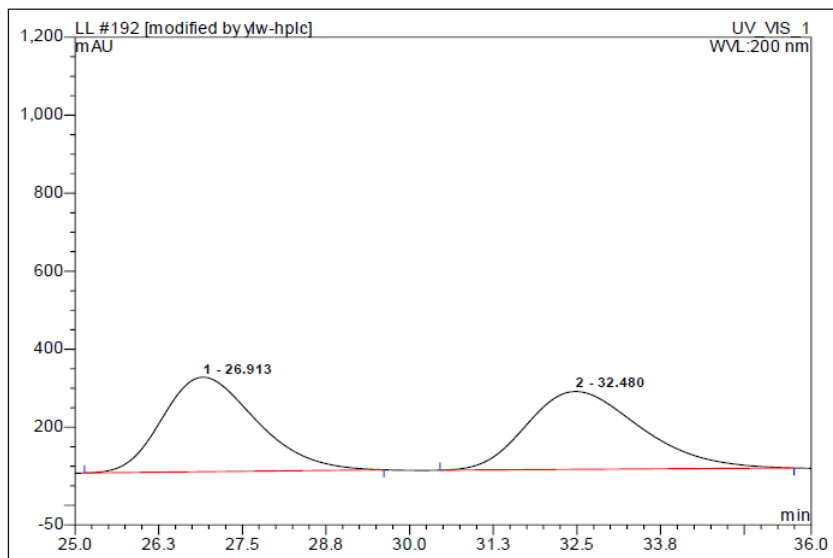

| No.           | Ret.Time<br>min | Peak Name | Height<br>mAU | Area<br>mAU*min | Rel.Area<br>% | Amount<br>n.a. | Type |
|---------------|-----------------|-----------|---------------|-----------------|---------------|----------------|------|
| 1             | 26.91           | n.a.      | 242.256       | 394.451         | 50.08         | n.a.           | BMB* |
| 2             | 32.48           | n.a.      | 199.536       | 393.236         | 49.92         | n.a.           | BMB* |
| <b>Total:</b> |                 |           | 441.792       | 787.688         | 100.00        | 0.000          |      |

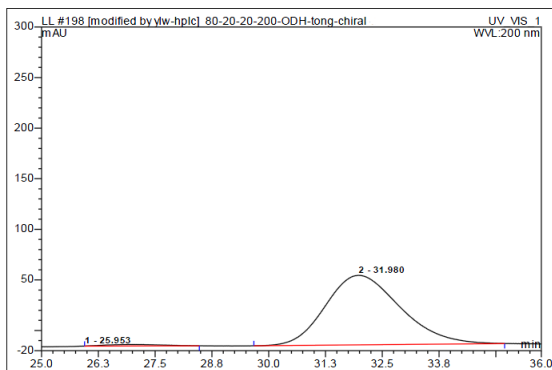

| No.           | Ret.Time<br>min | Peak Name | Height<br>mAU | Area<br>mAU*min | Rel.Area<br>% | Amount<br>n.a. | Type |
|---------------|-----------------|-----------|---------------|-----------------|---------------|----------------|------|
| 1             | 25.95           | n.a.      | 0.040         | 2.070           | 1.56          | n.a.           | BMB* |
| 2             | 31.98           | n.a.      | 68.642        | 130.905         | 98.44         | n.a.           | BMB* |
| <b>Total:</b> |                 |           | 68.683        | 132.975         | 100.00        | 0.000          |      |

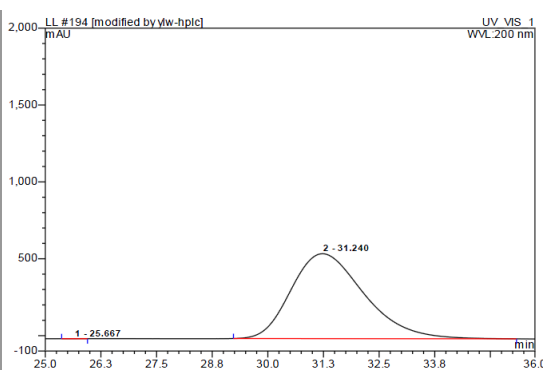

| No.           | Ret.Time<br>min | Peak Name | Height<br>mAU | Area<br>mAU*min | Rel.Area<br>% | Amount<br>n.a. | Type |
|---------------|-----------------|-----------|---------------|-----------------|---------------|----------------|------|
| 1             | 25.67           | n.a.      | 0.087         | 0.017           | 0.00          | n.a.           | BMB* |
| 2             | 31.24           | n.a.      | 551.958       | 1050.901        | 100.00        | n.a.           | BMB* |
| <b>Total:</b> |                 |           | 552.044       | 1050.917        | 100.00        | 0.000          |      |

after recrystallization



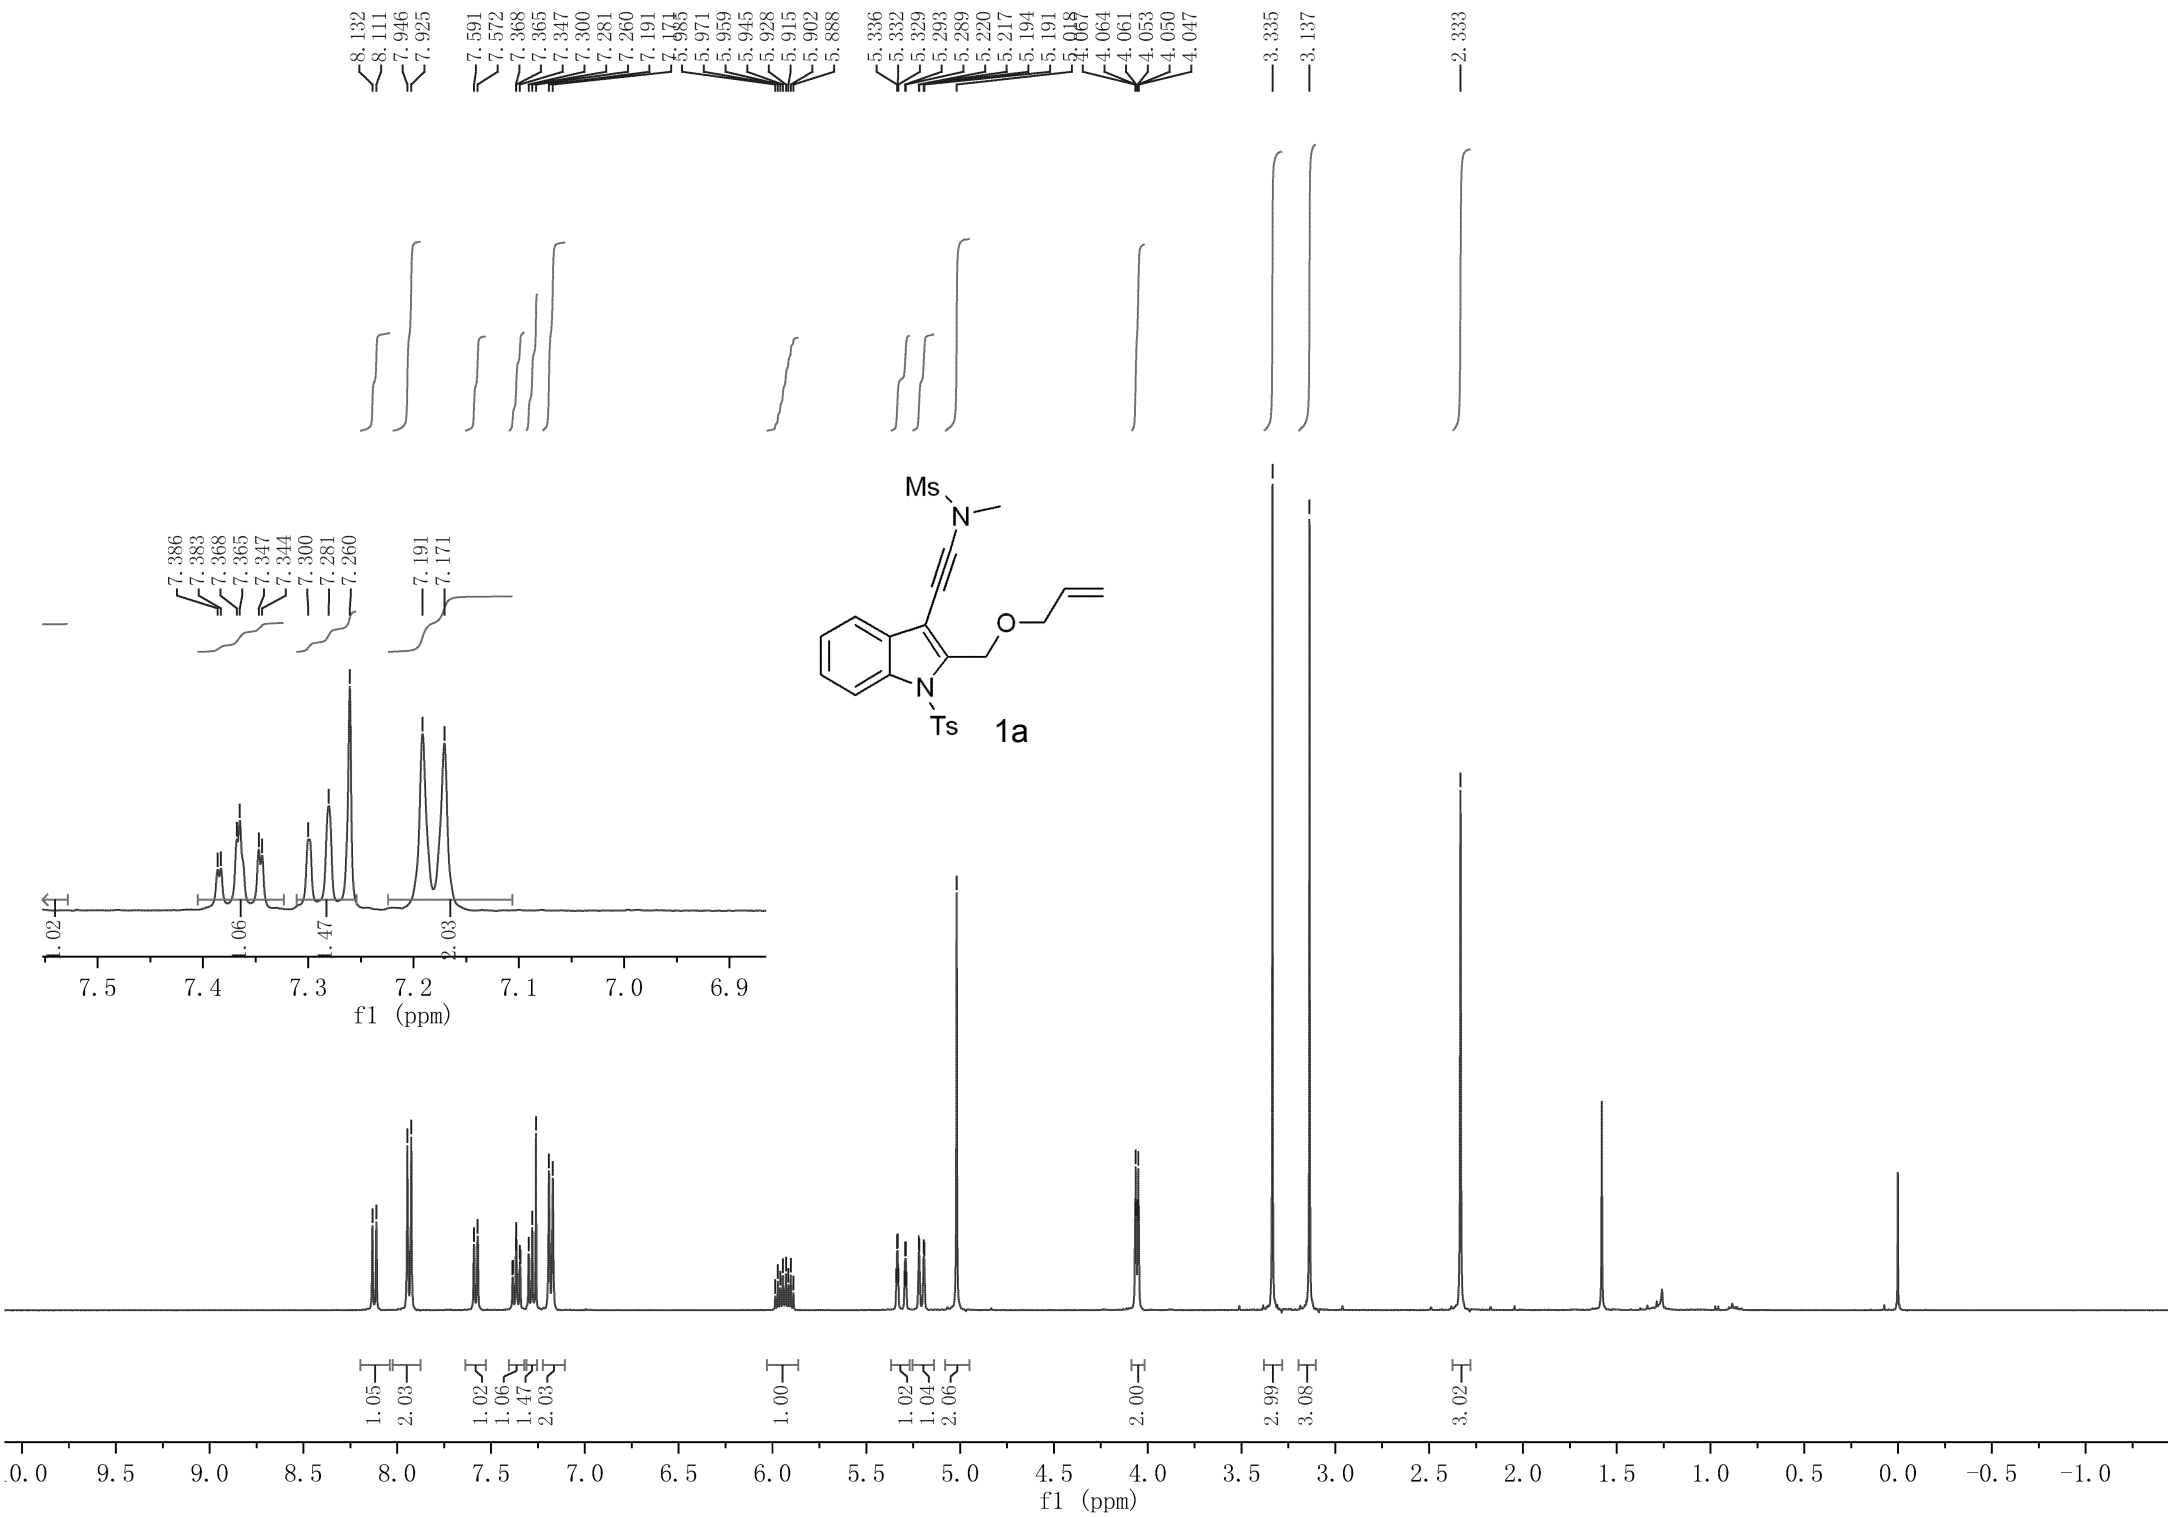

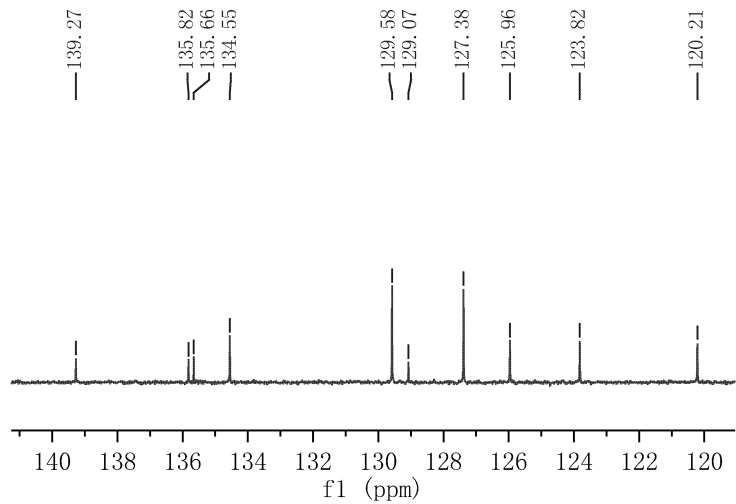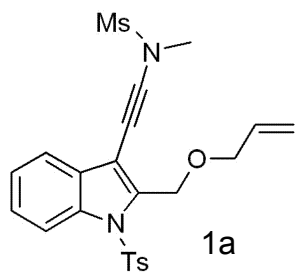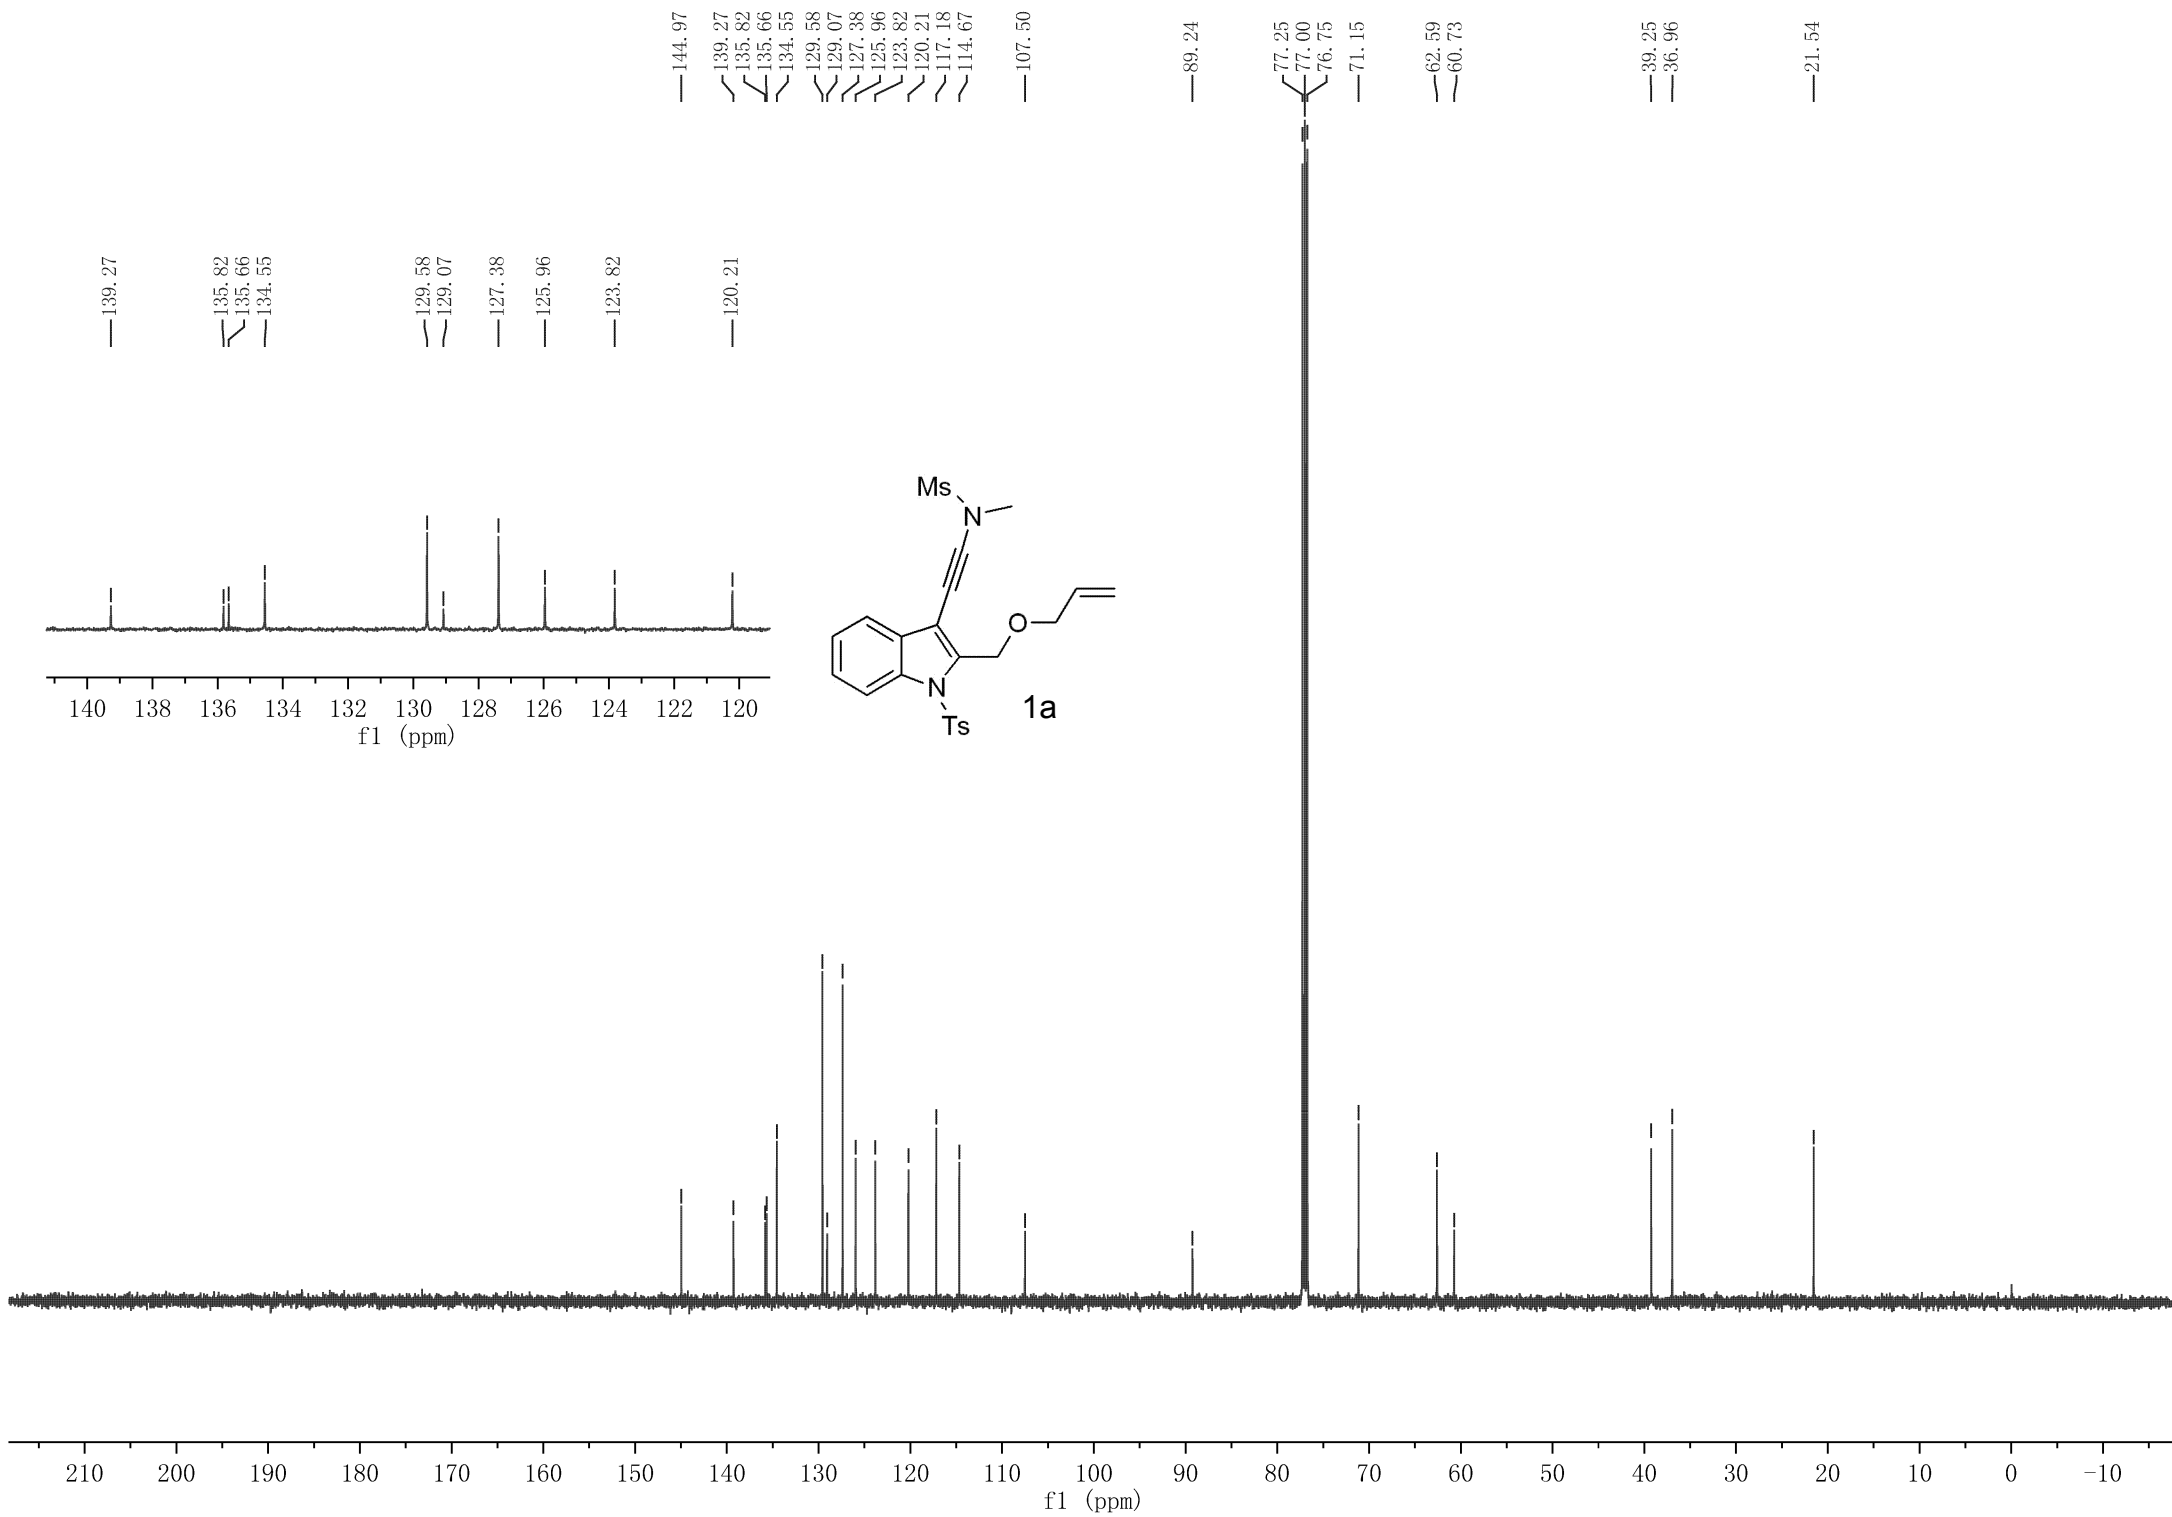

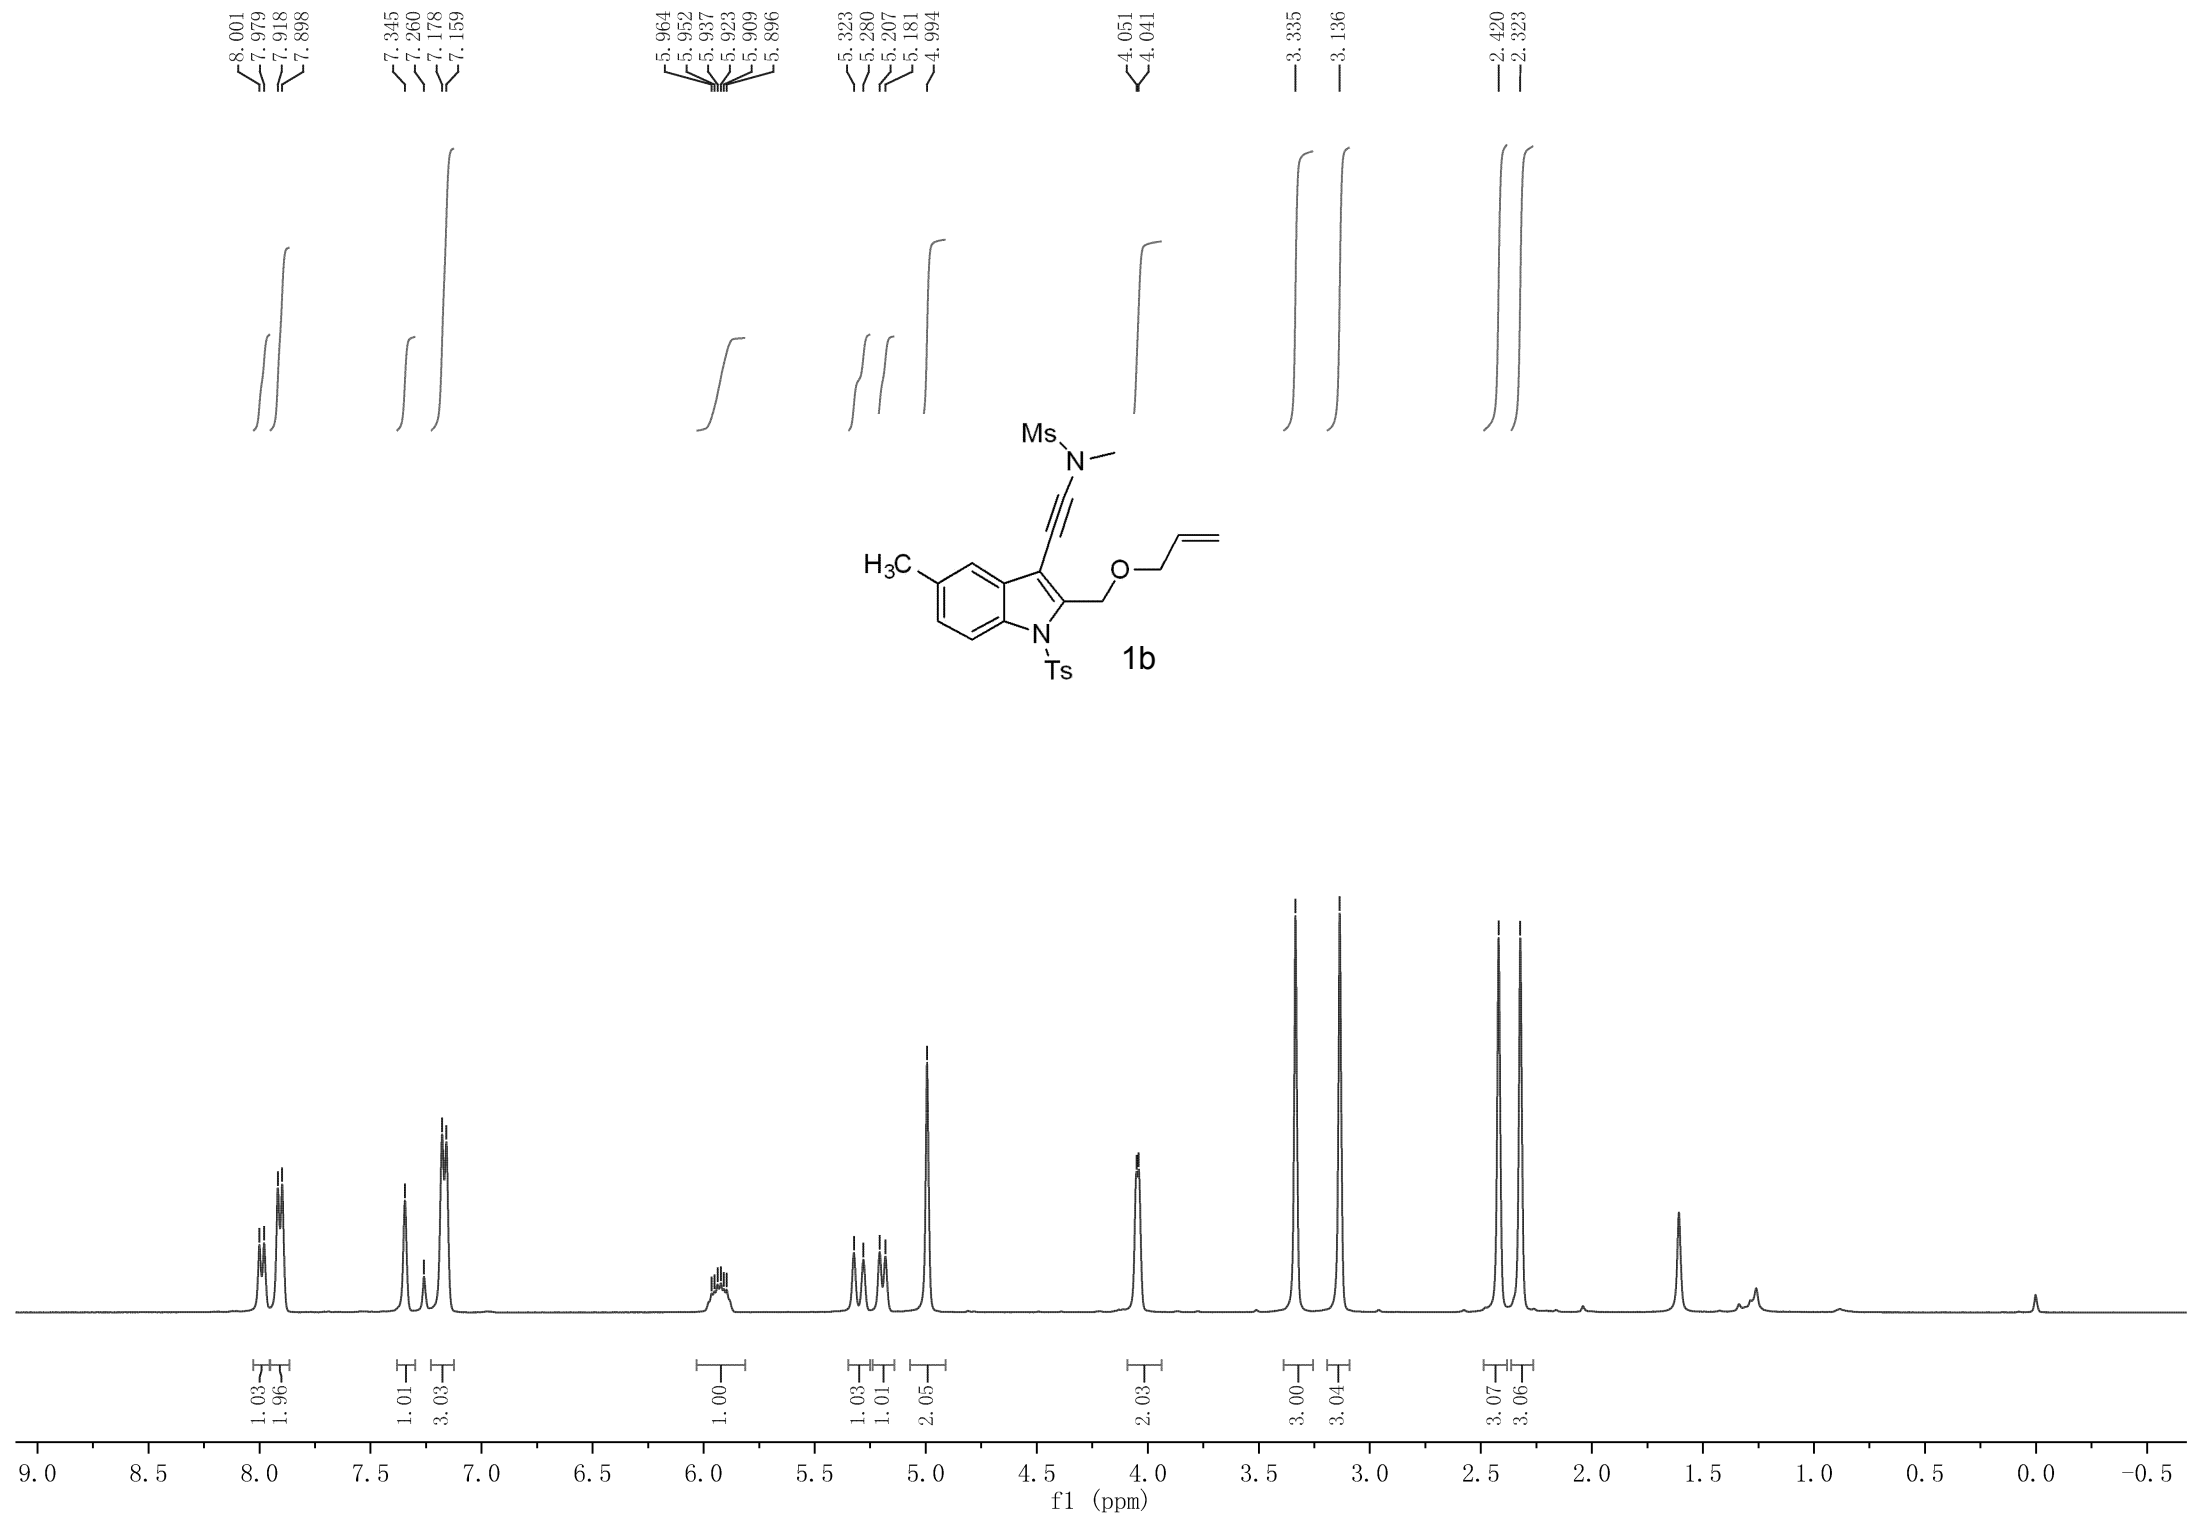

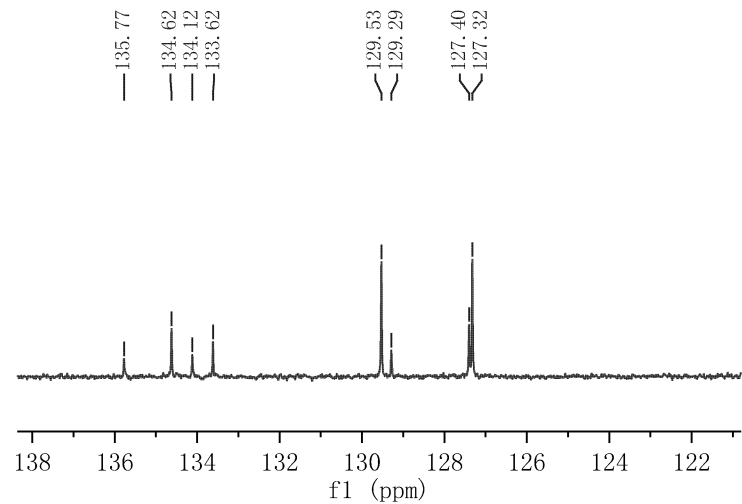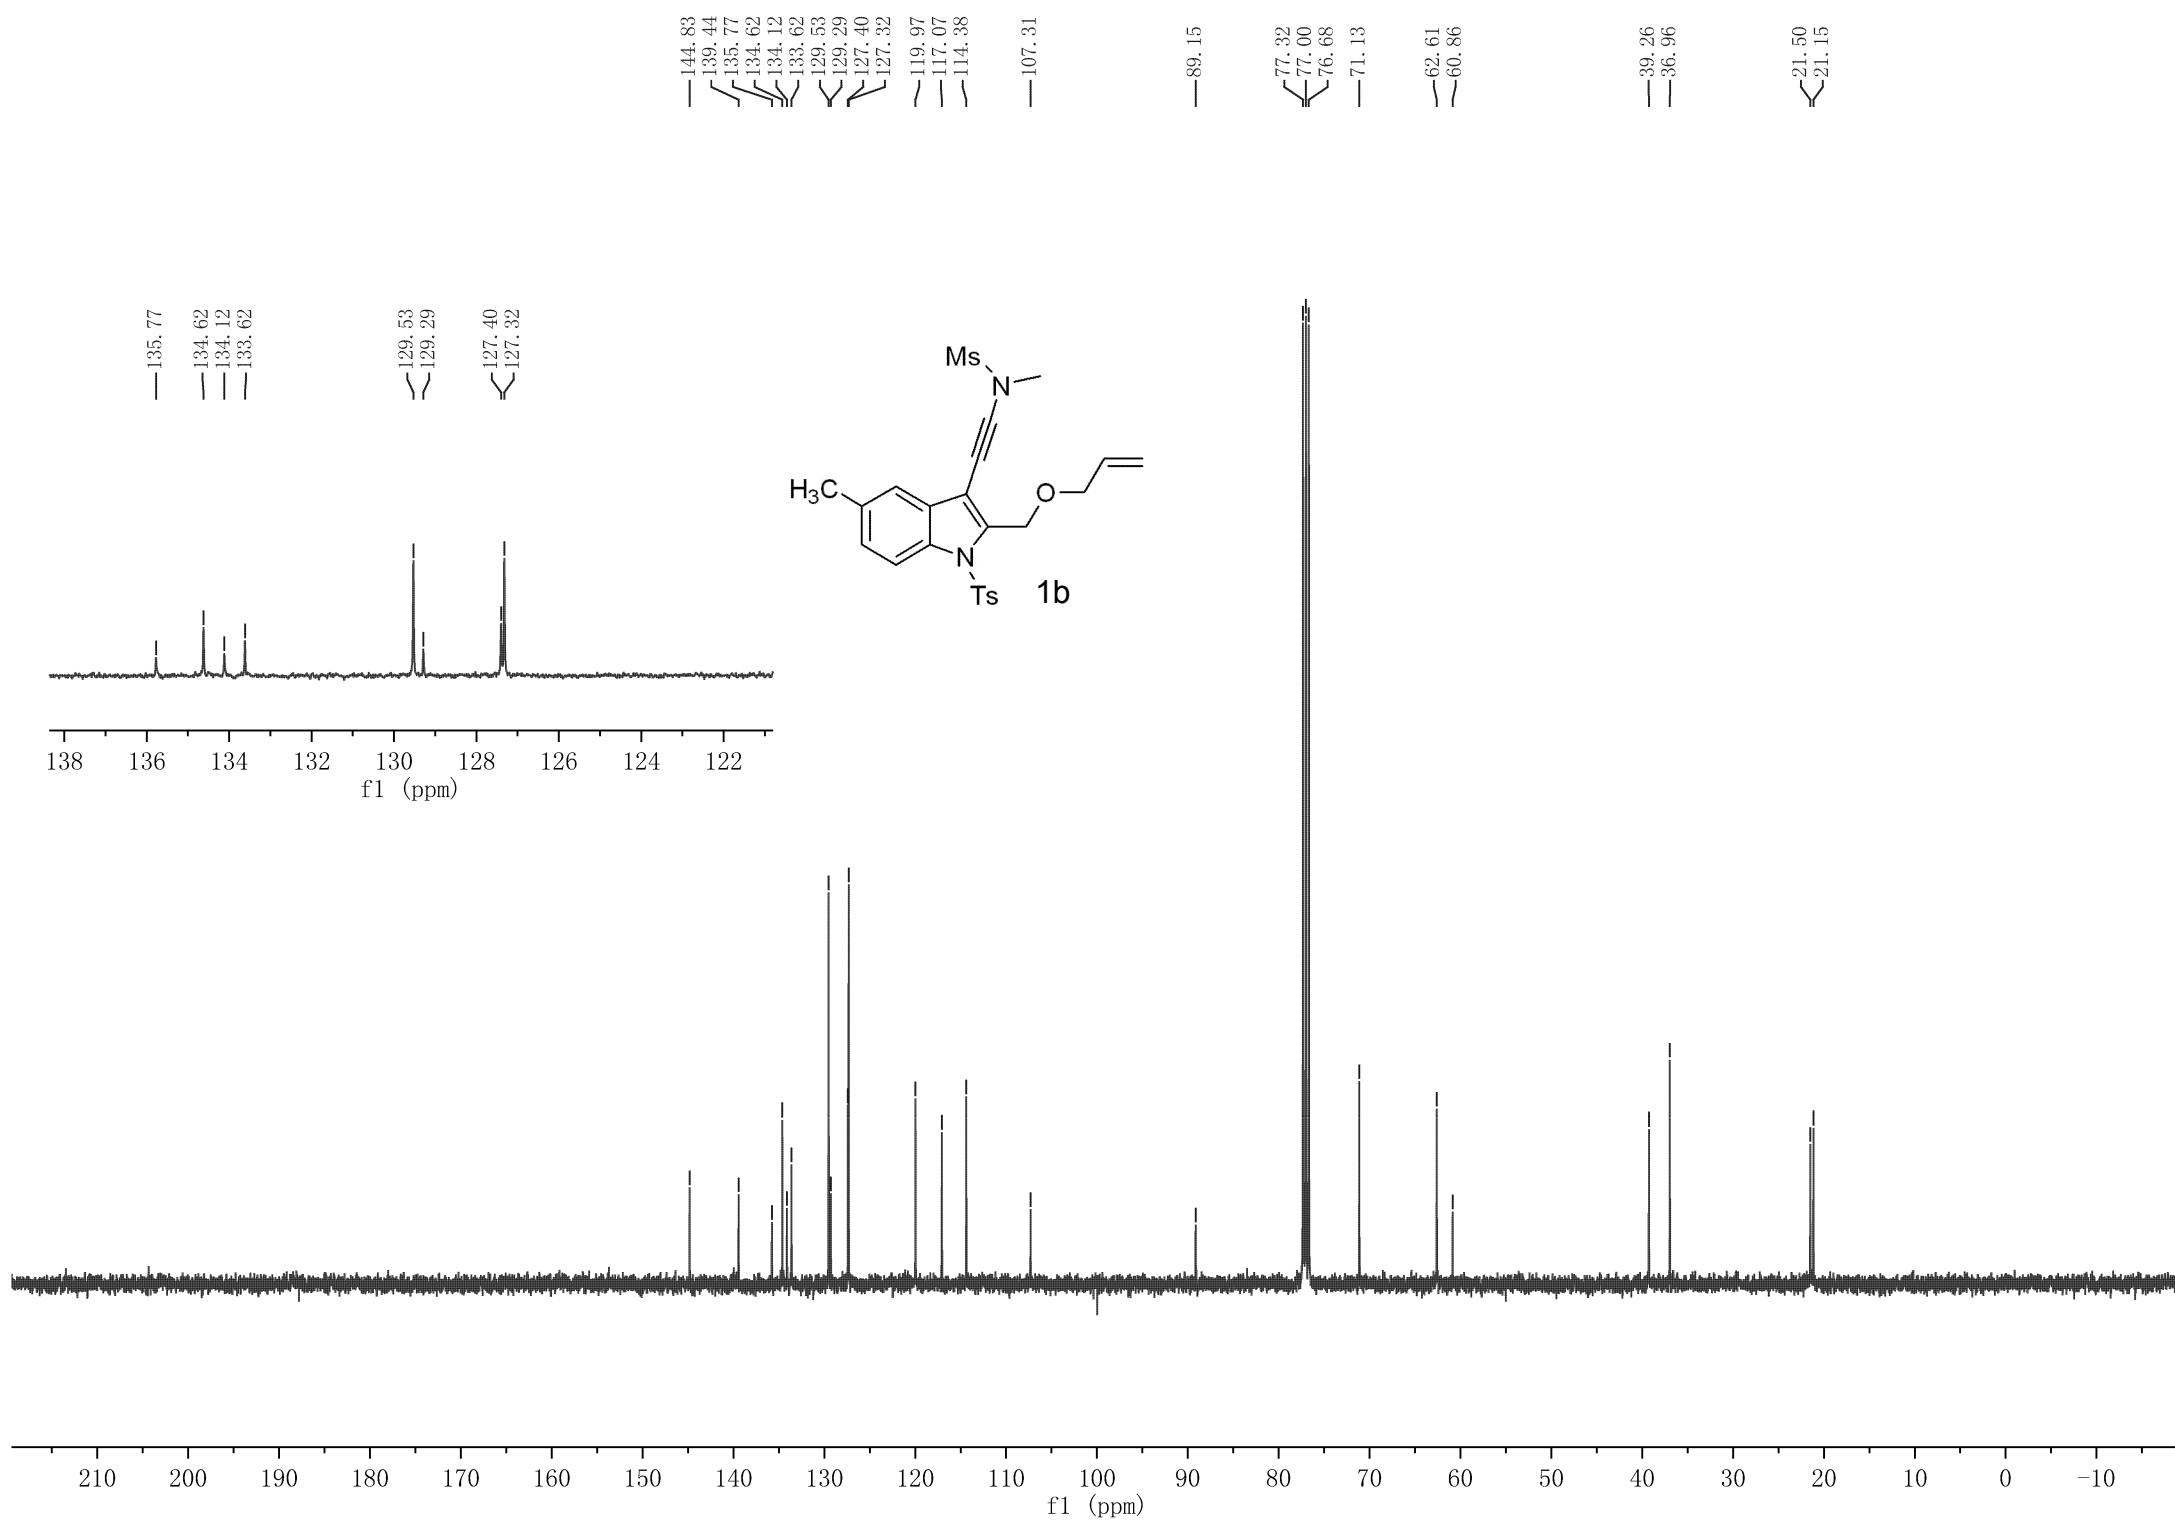

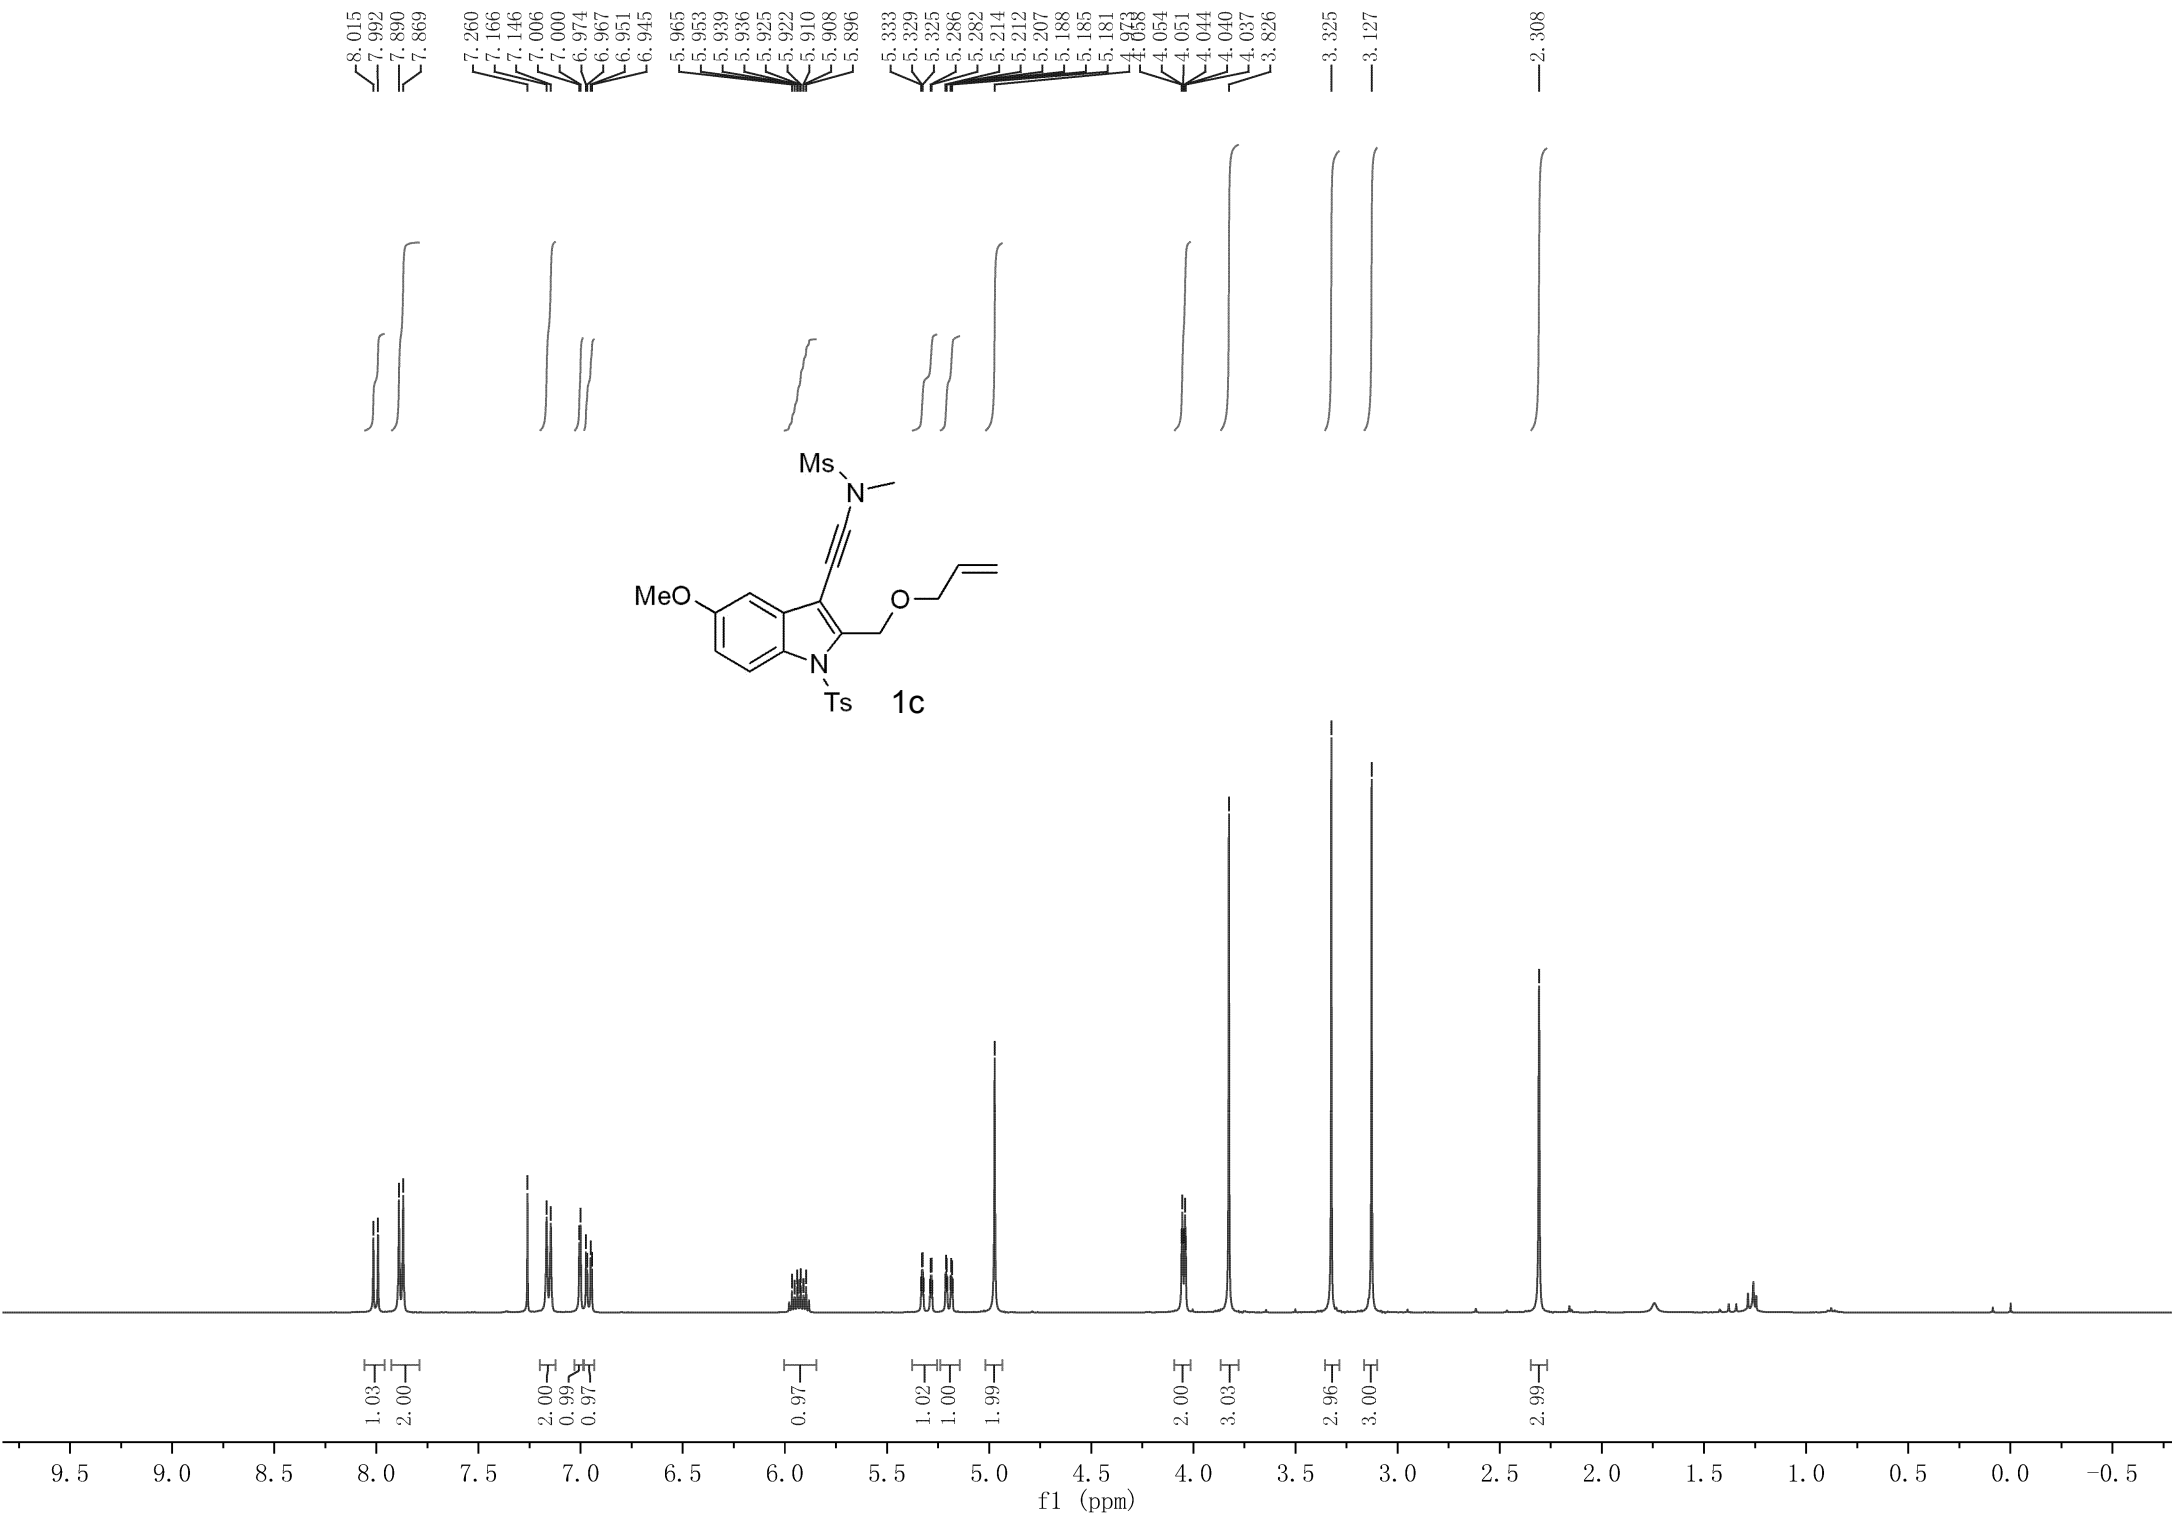

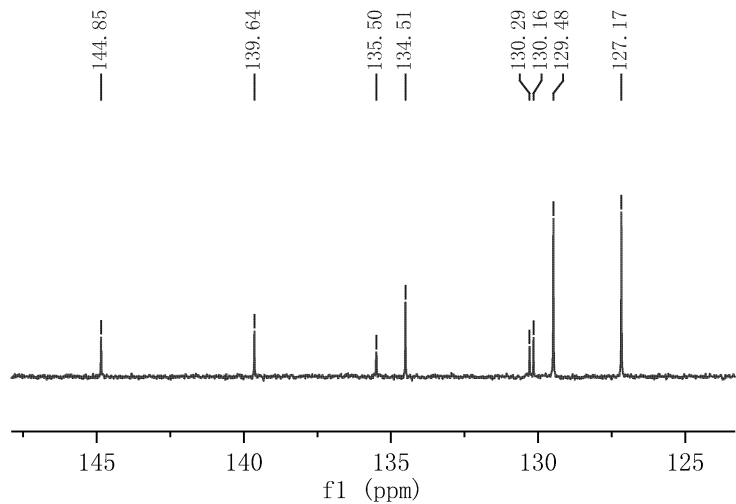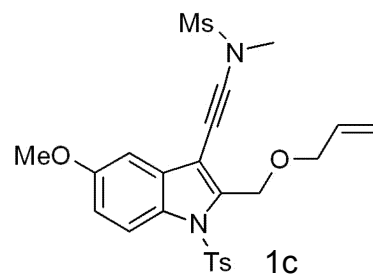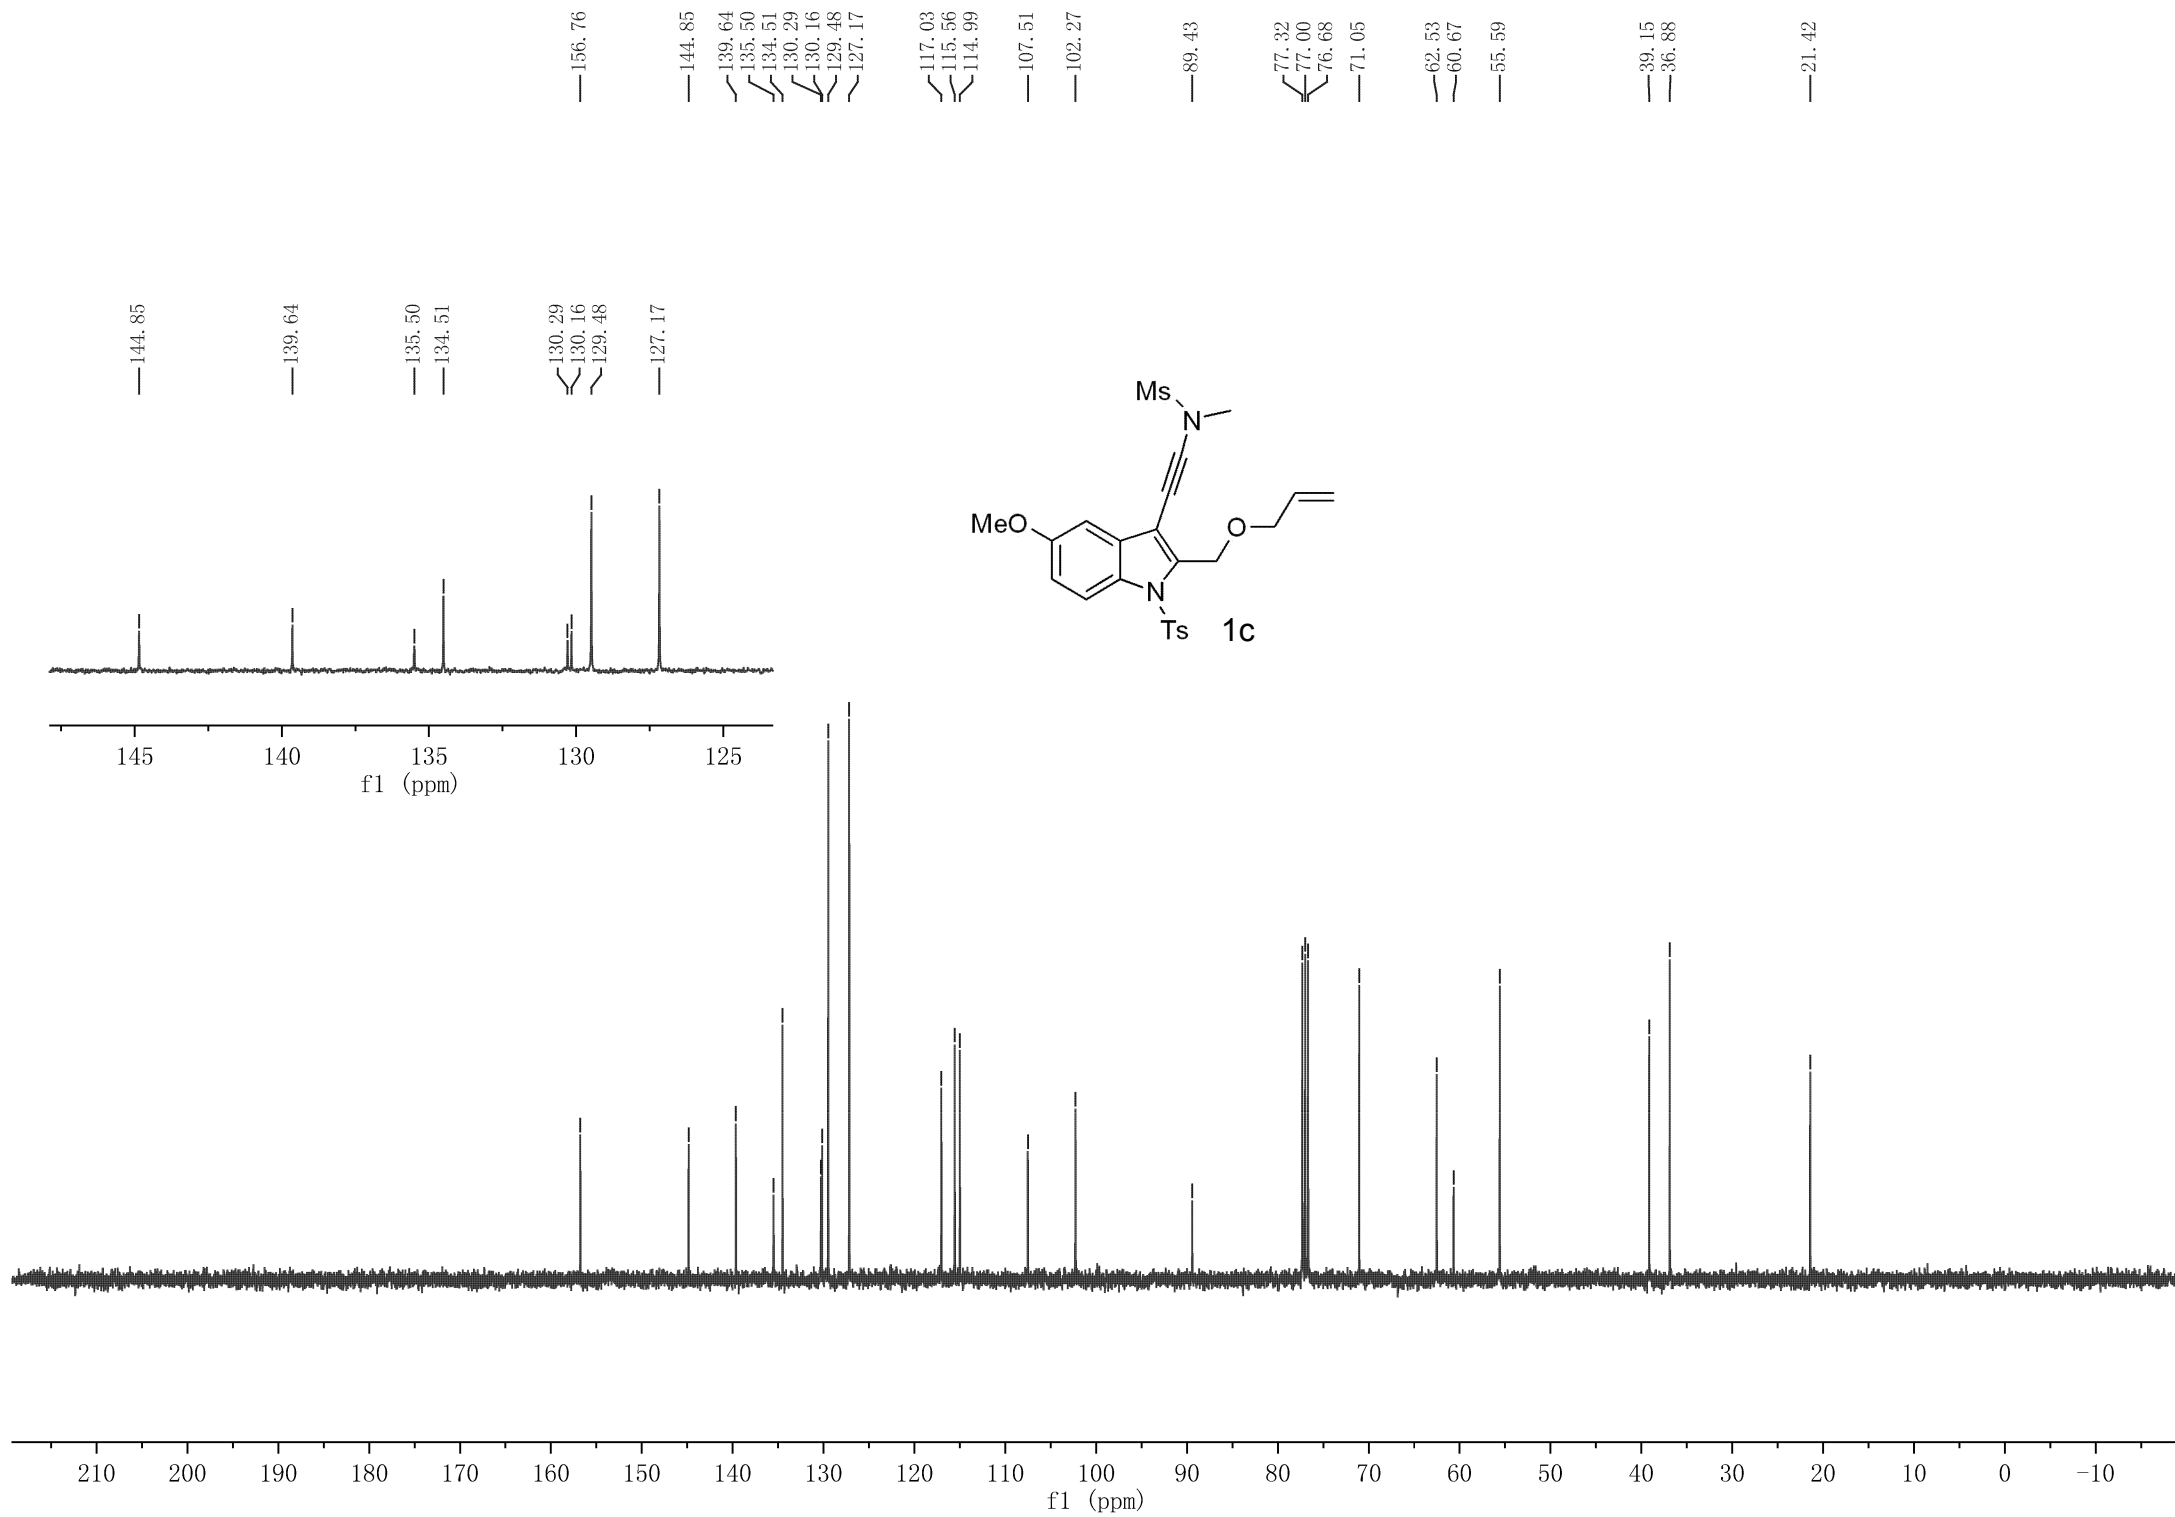

8.082  
8.072  
8.059  
8.049  
7.910  
7.889  
7.234  
7.227  
7.213  
7.207  
7.192  
7.172  
7.100  
7.094  
7.078  
7.071  
7.055  
7.064  
5.951  
5.938  
5.921  
5.908  
5.895  
5.335  
5.331  
5.291  
5.288  
5.220  
5.194  
4.985

4.063  
4.049

3.325  
3.133

2.323

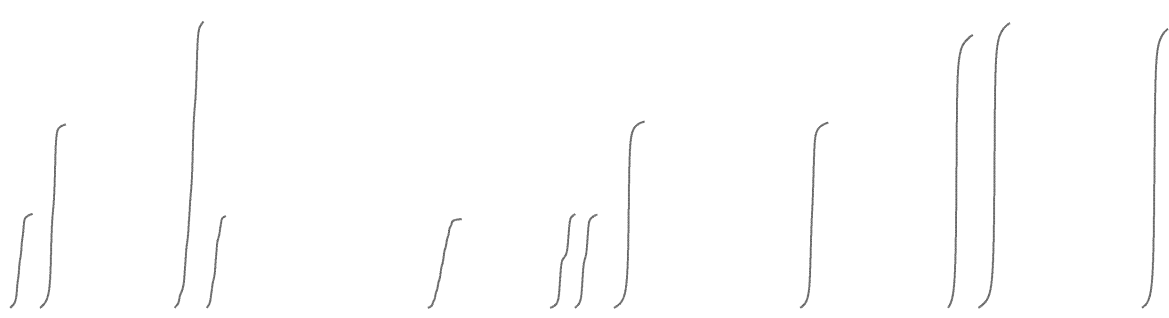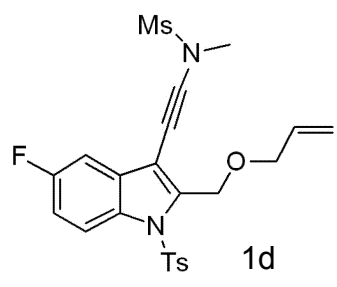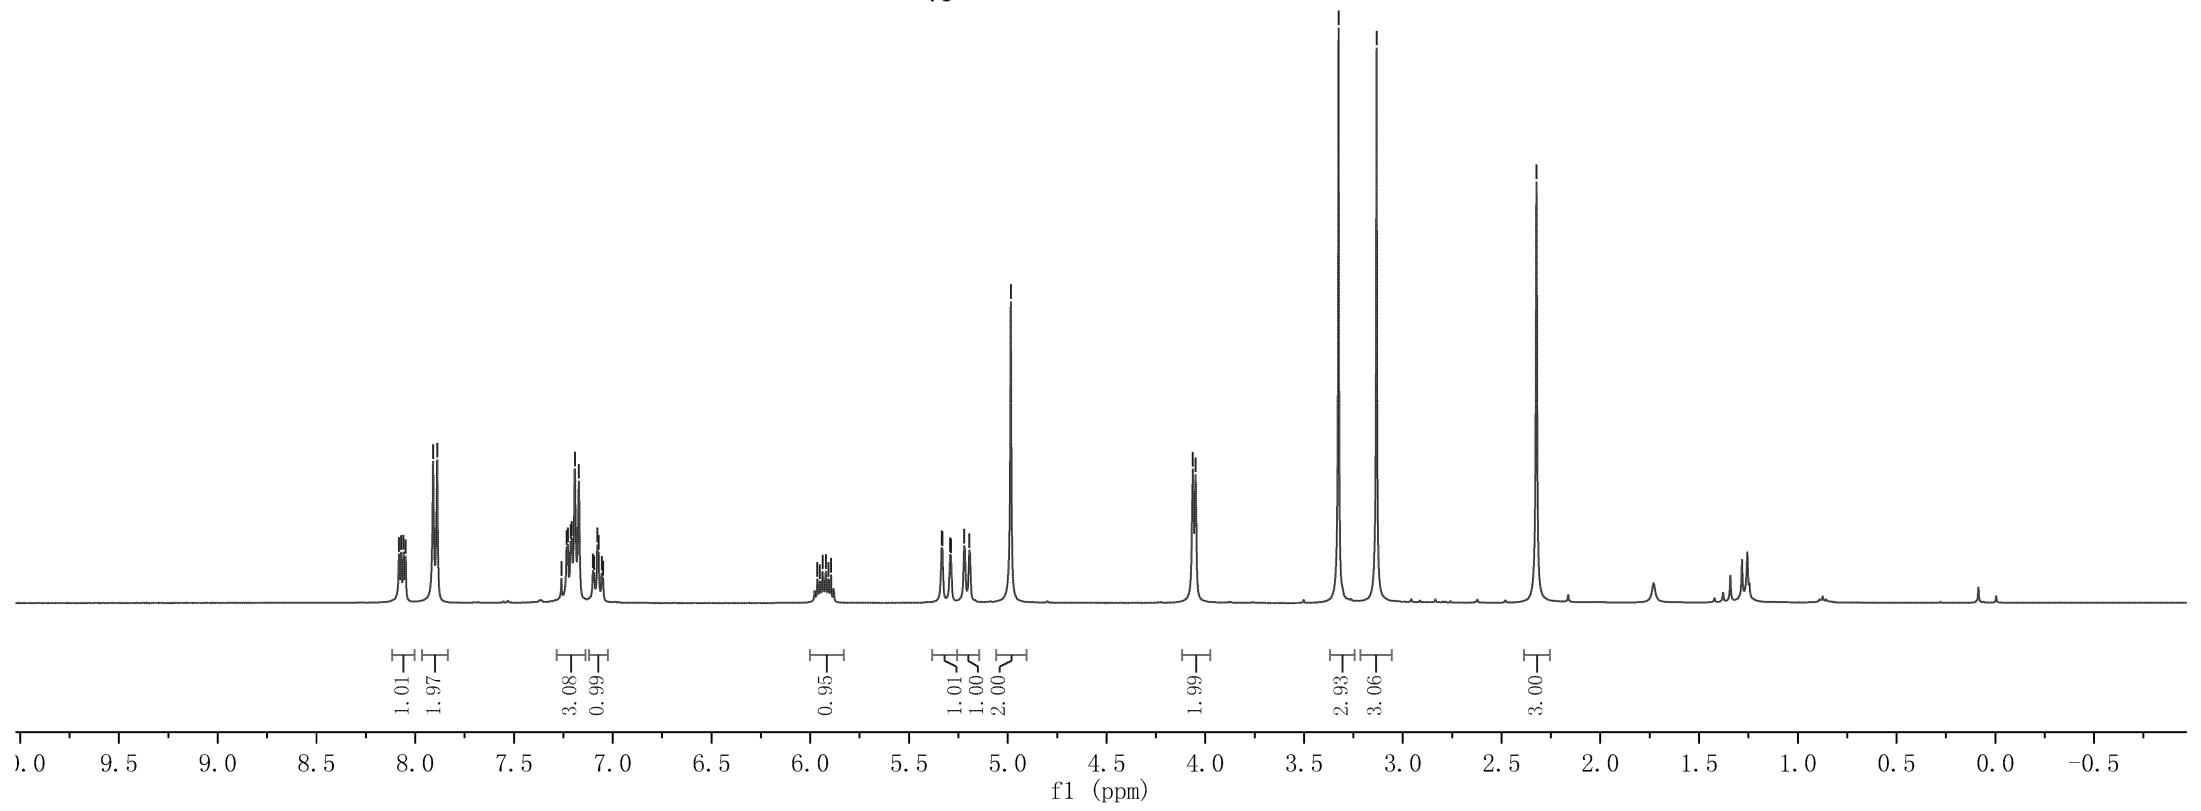

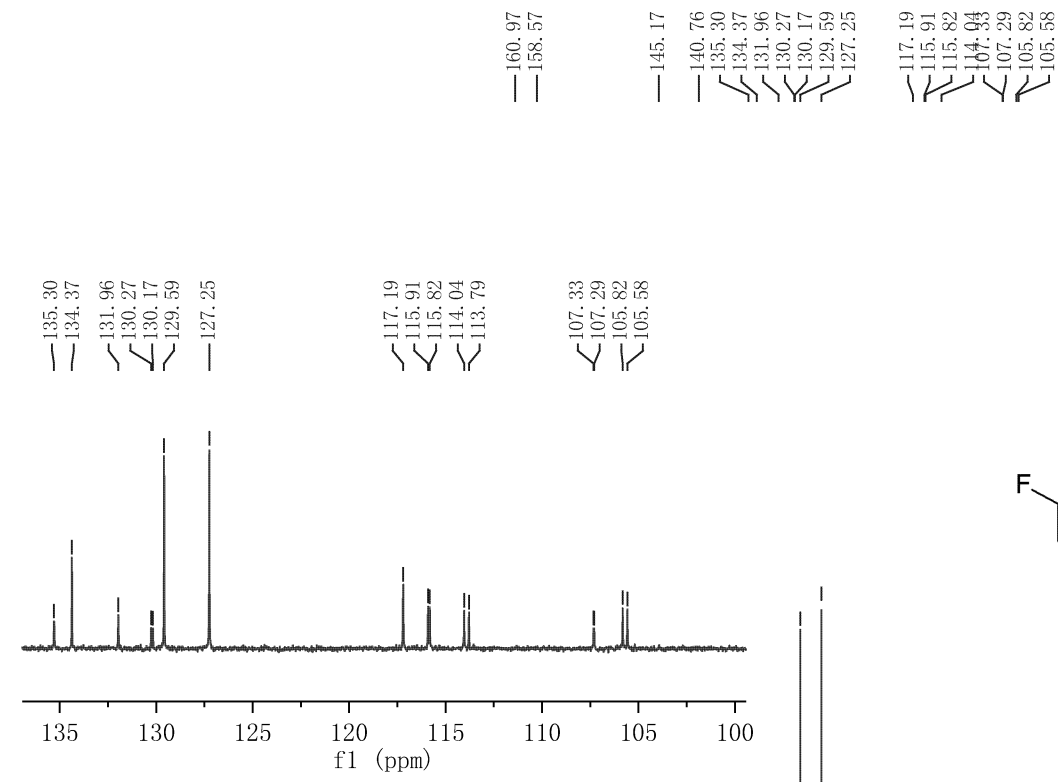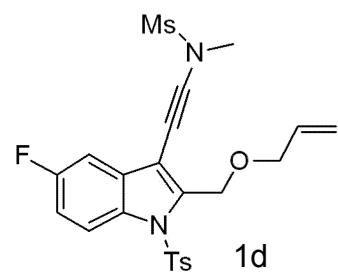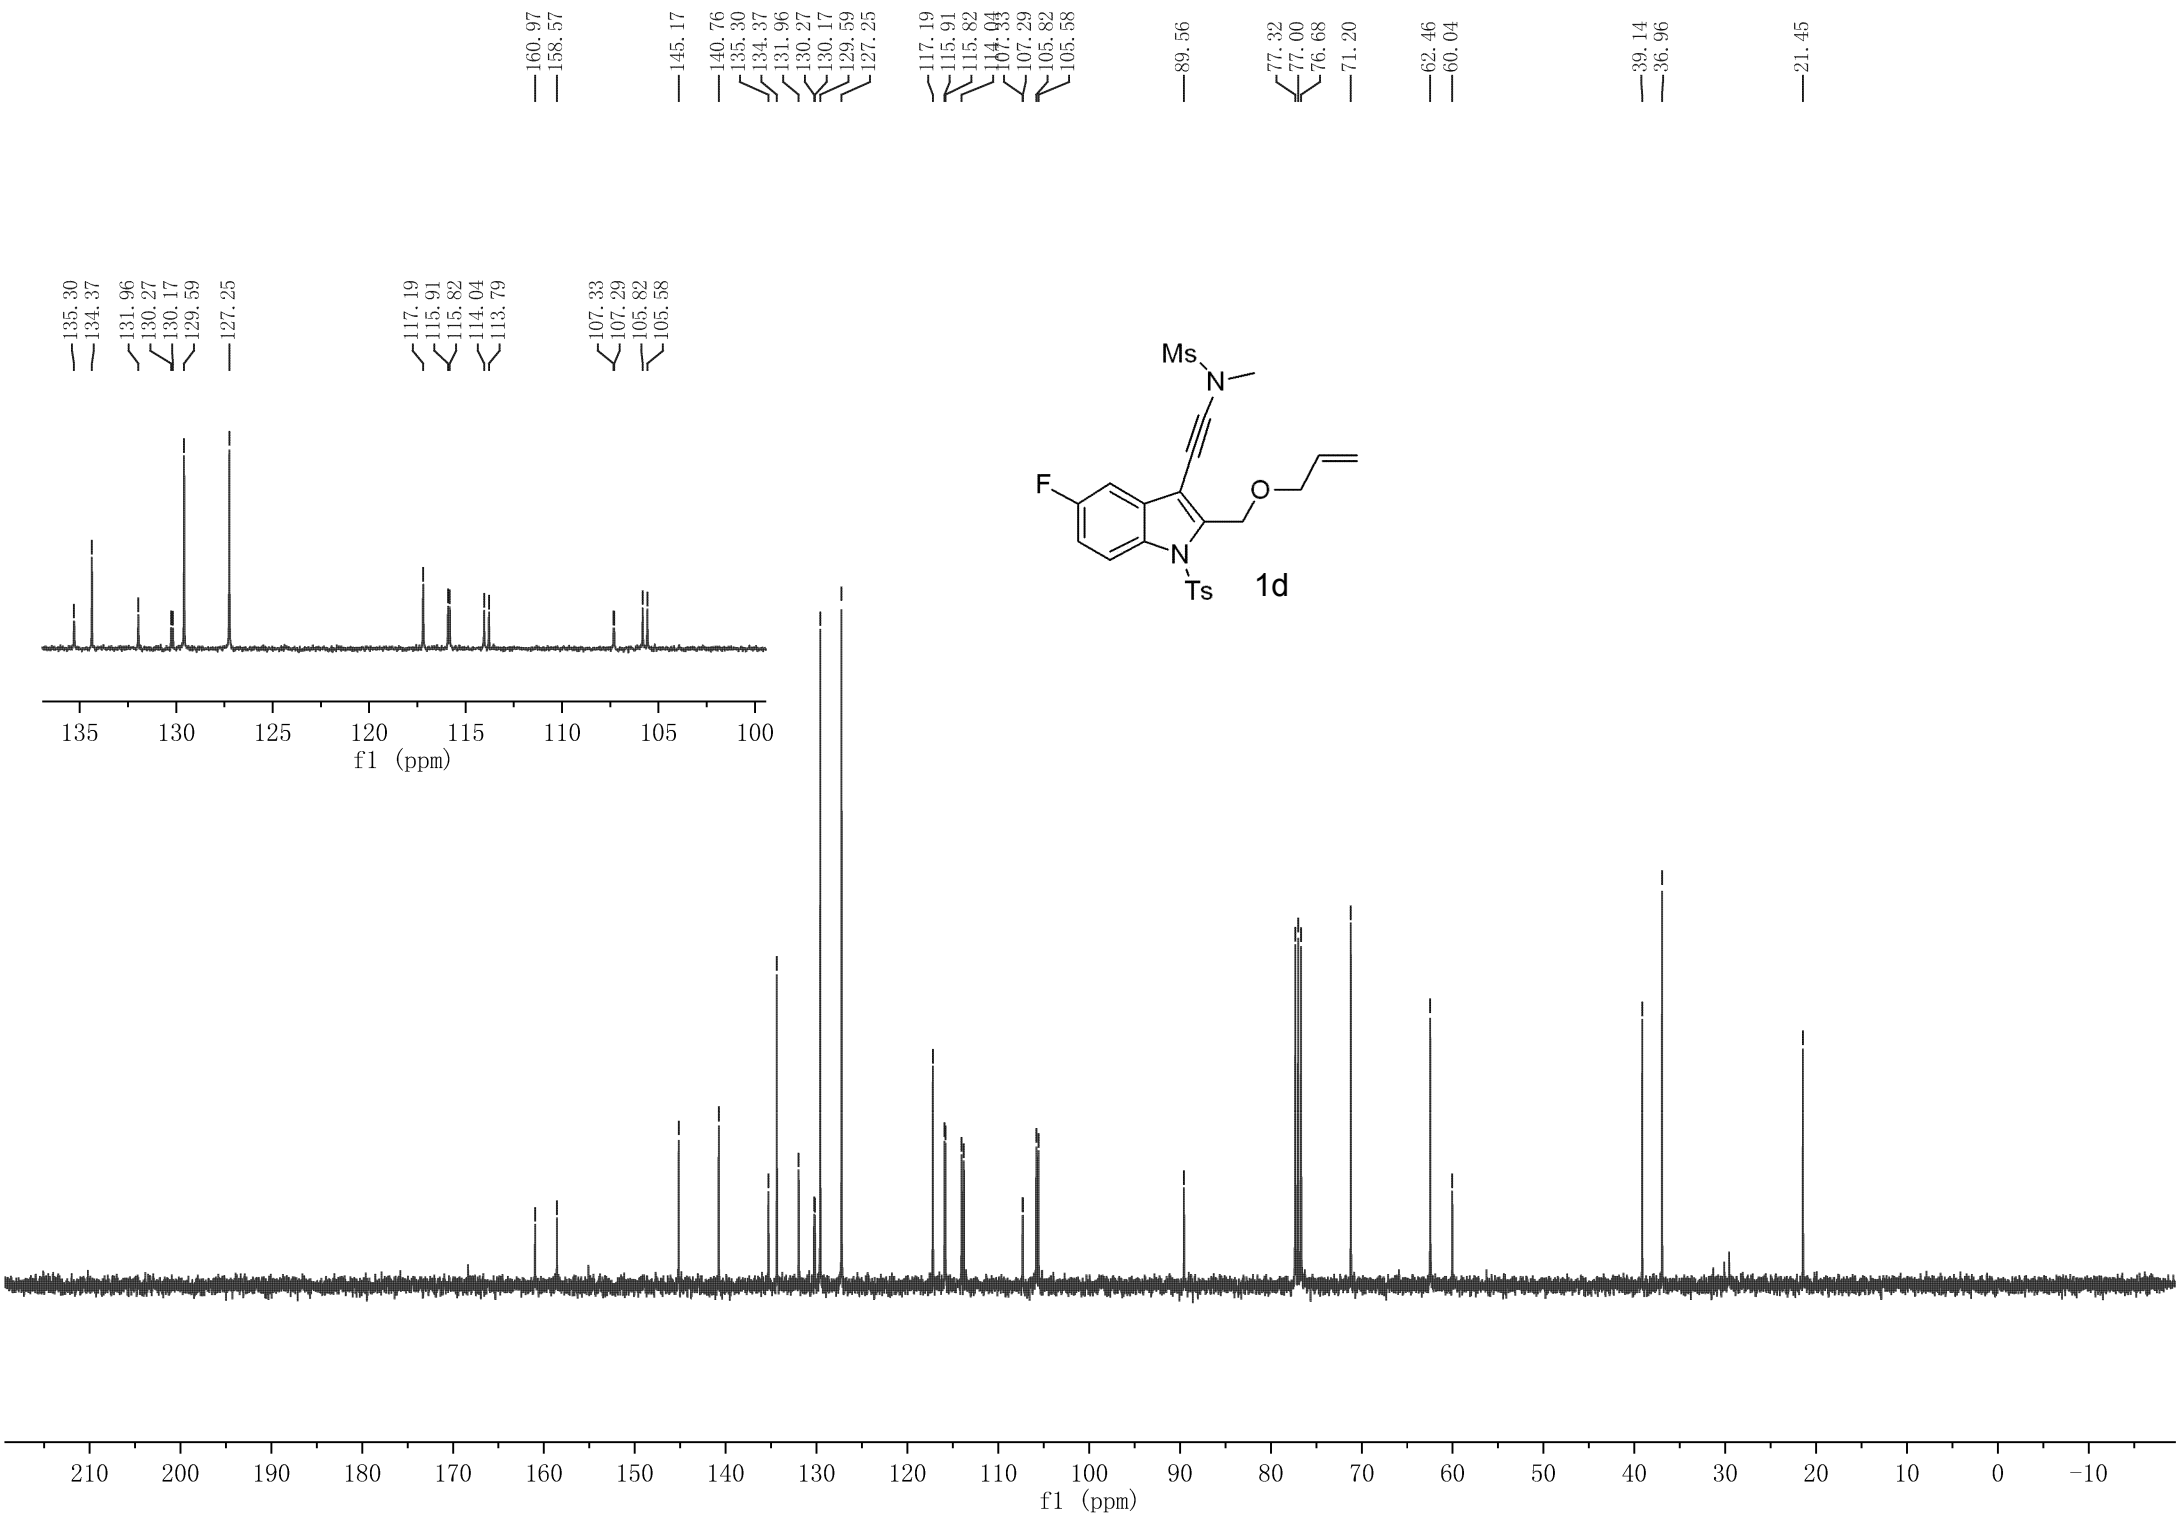



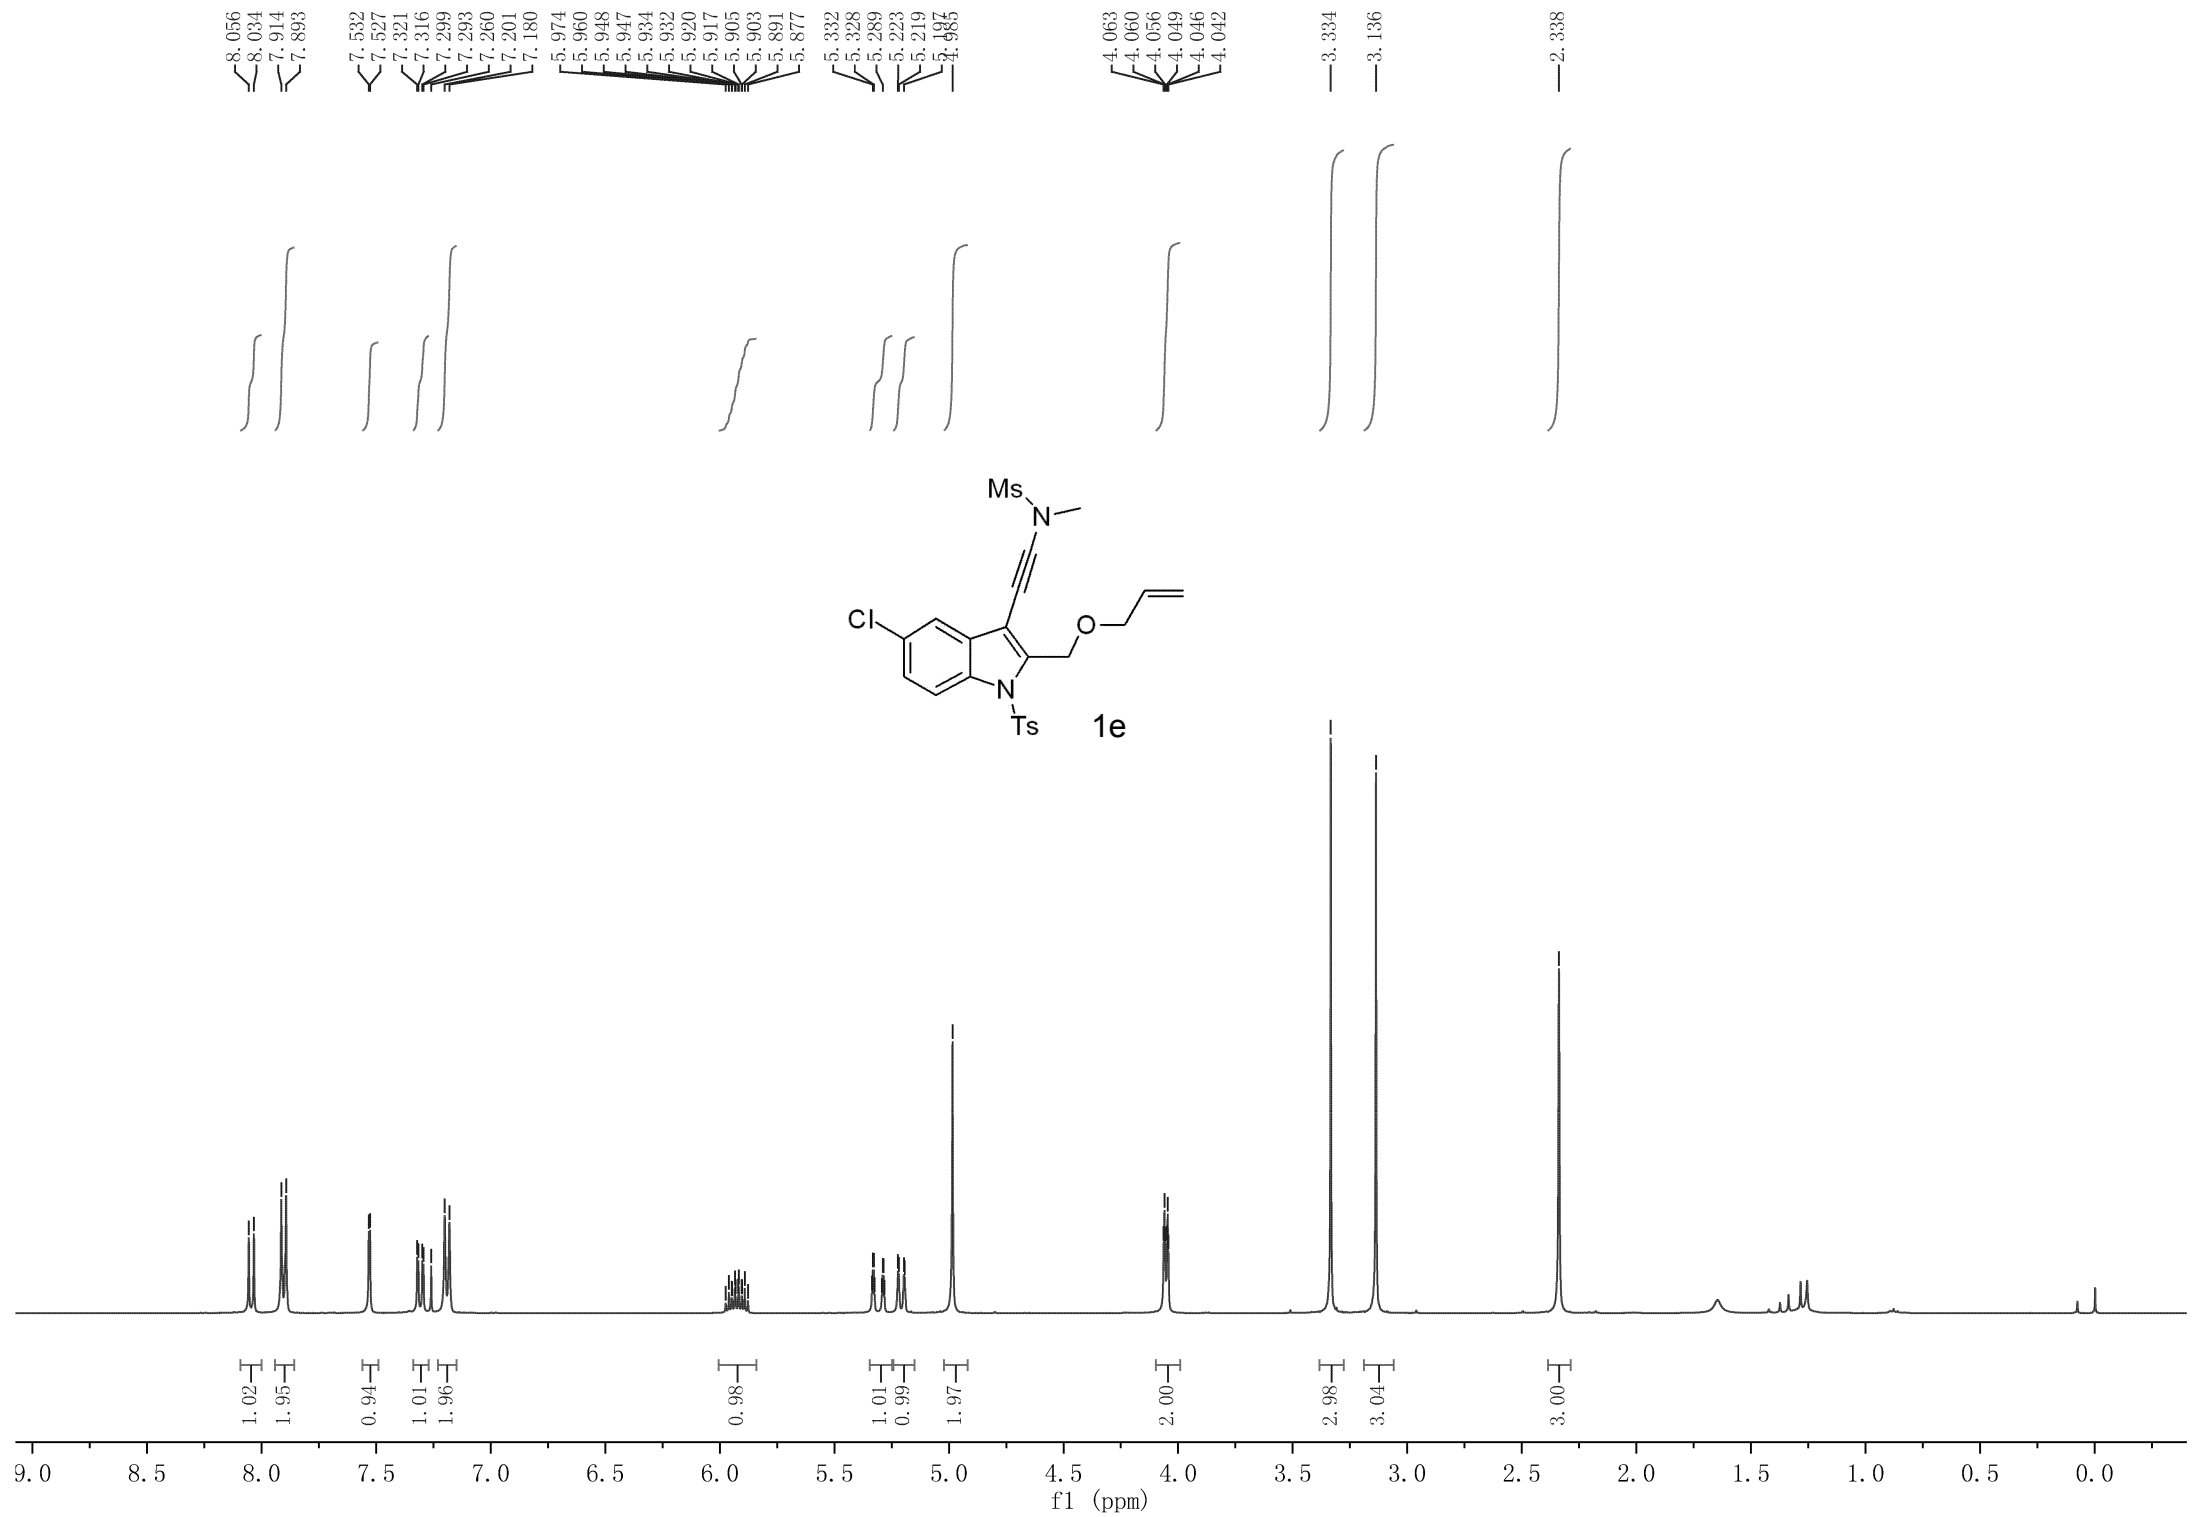

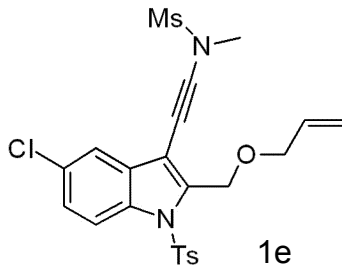

135.42  
134.45  
134.18

130.38  
129.82  
129.71

127.39  
126.21

119.83

117.34

115.85

145.32  
140.73  
134.45  
134.18  
130.38  
129.82  
129.71  
127.39  
126.21  
119.83  
117.34  
115.85

106.87

89.59

77.36  
77.05  
76.73  
71.36

62.52  
60.08

39.25  
37.15

21.58

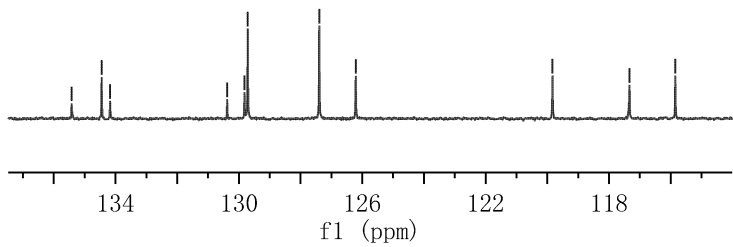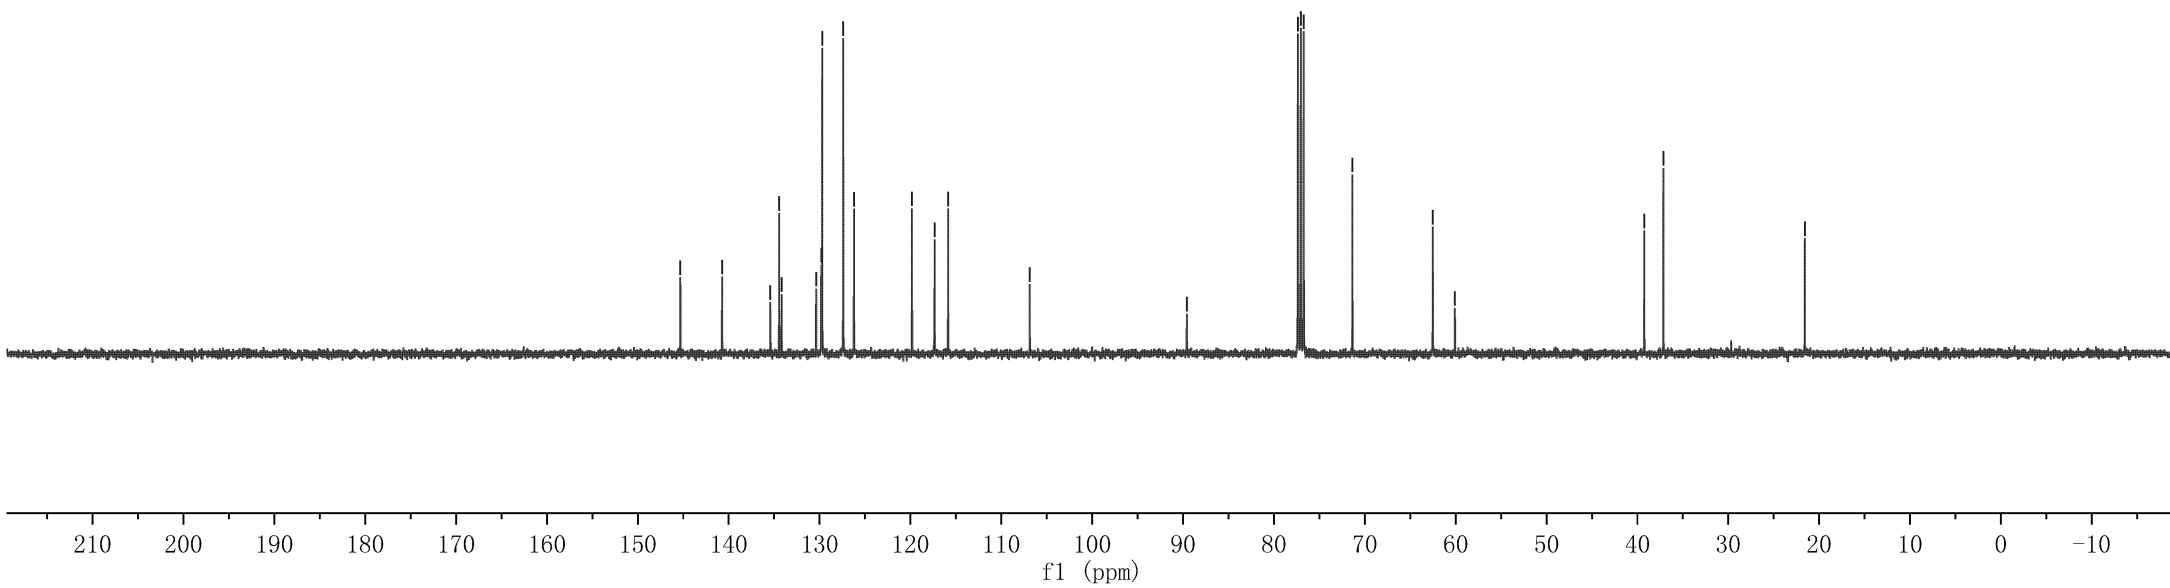

8.002  
7.980  
7.911  
7.890  
7.685  
7.681  
7.451  
7.446  
7.429  
7.424  
7.260  
7.195  
7.174

5.971  
5.957  
5.945  
5.931  
5.915  
5.901  
5.888  
5.874  
5.329  
5.325  
5.285  
5.218  
4.984

4.055  
4.042

3.332  
3.136

2.328

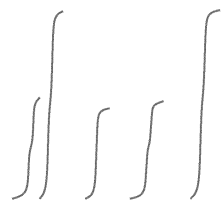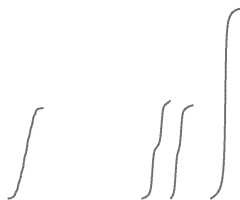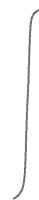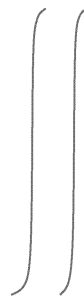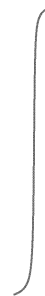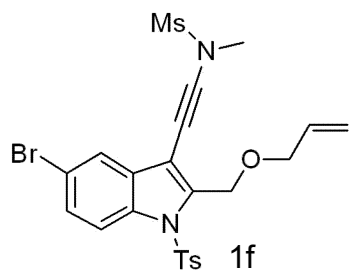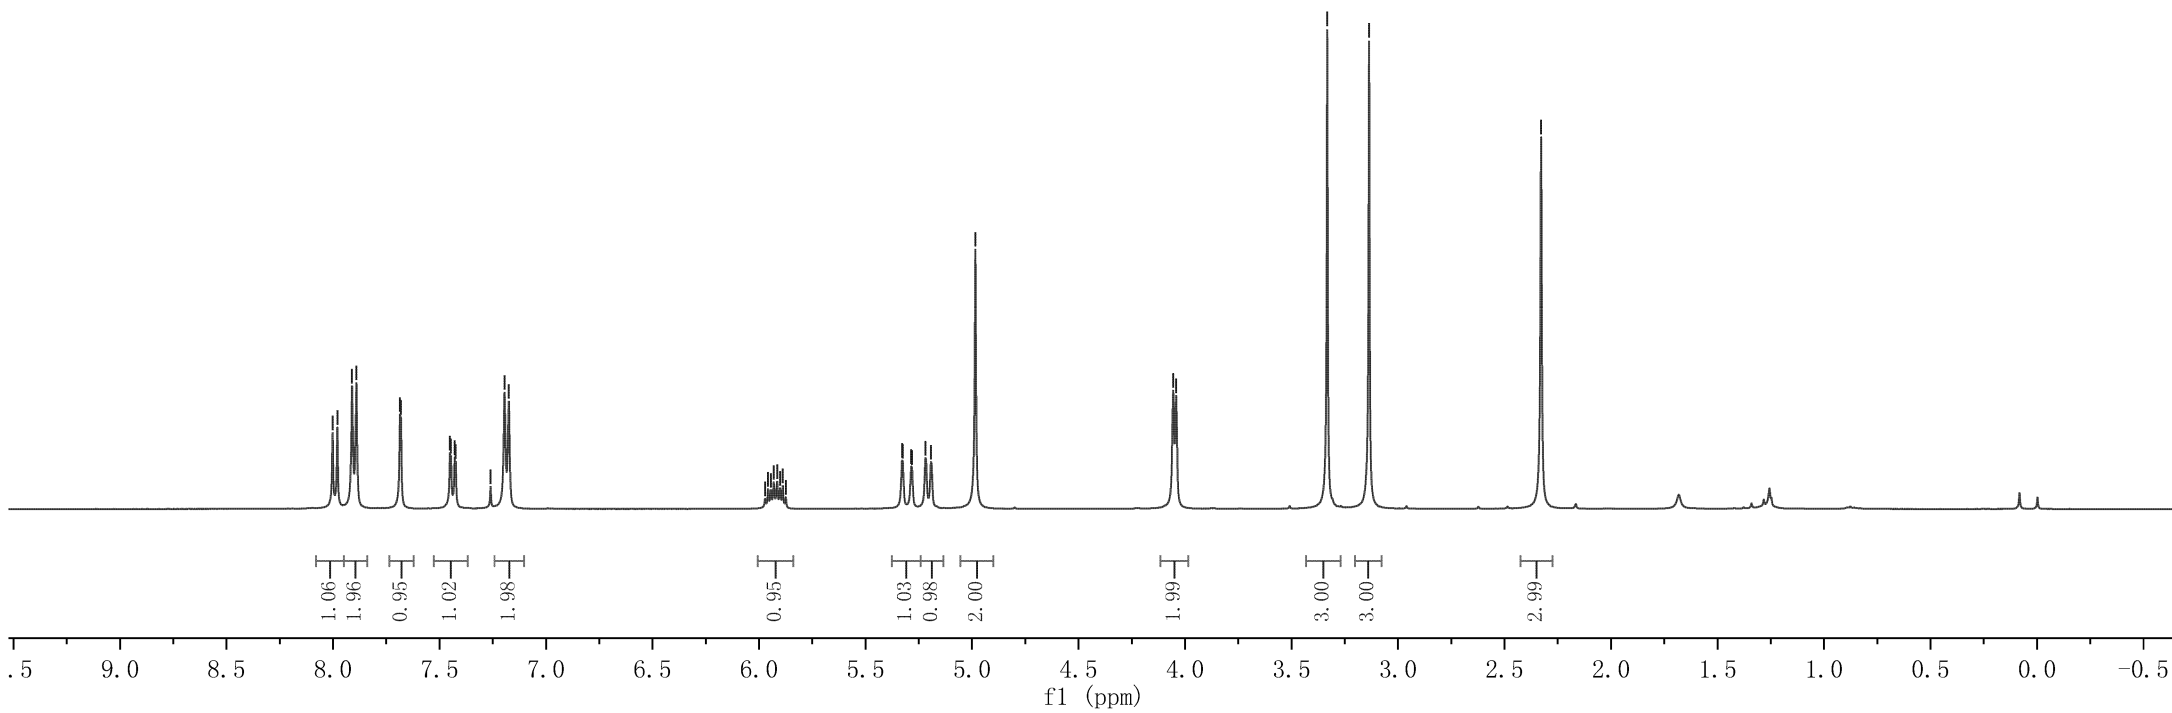

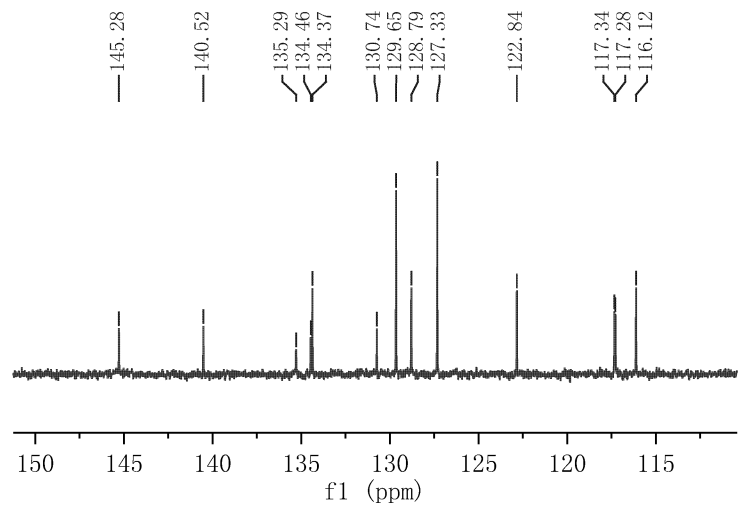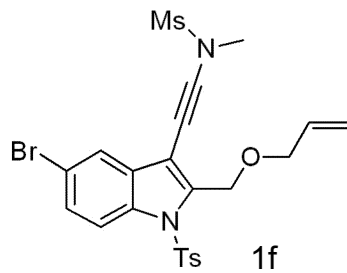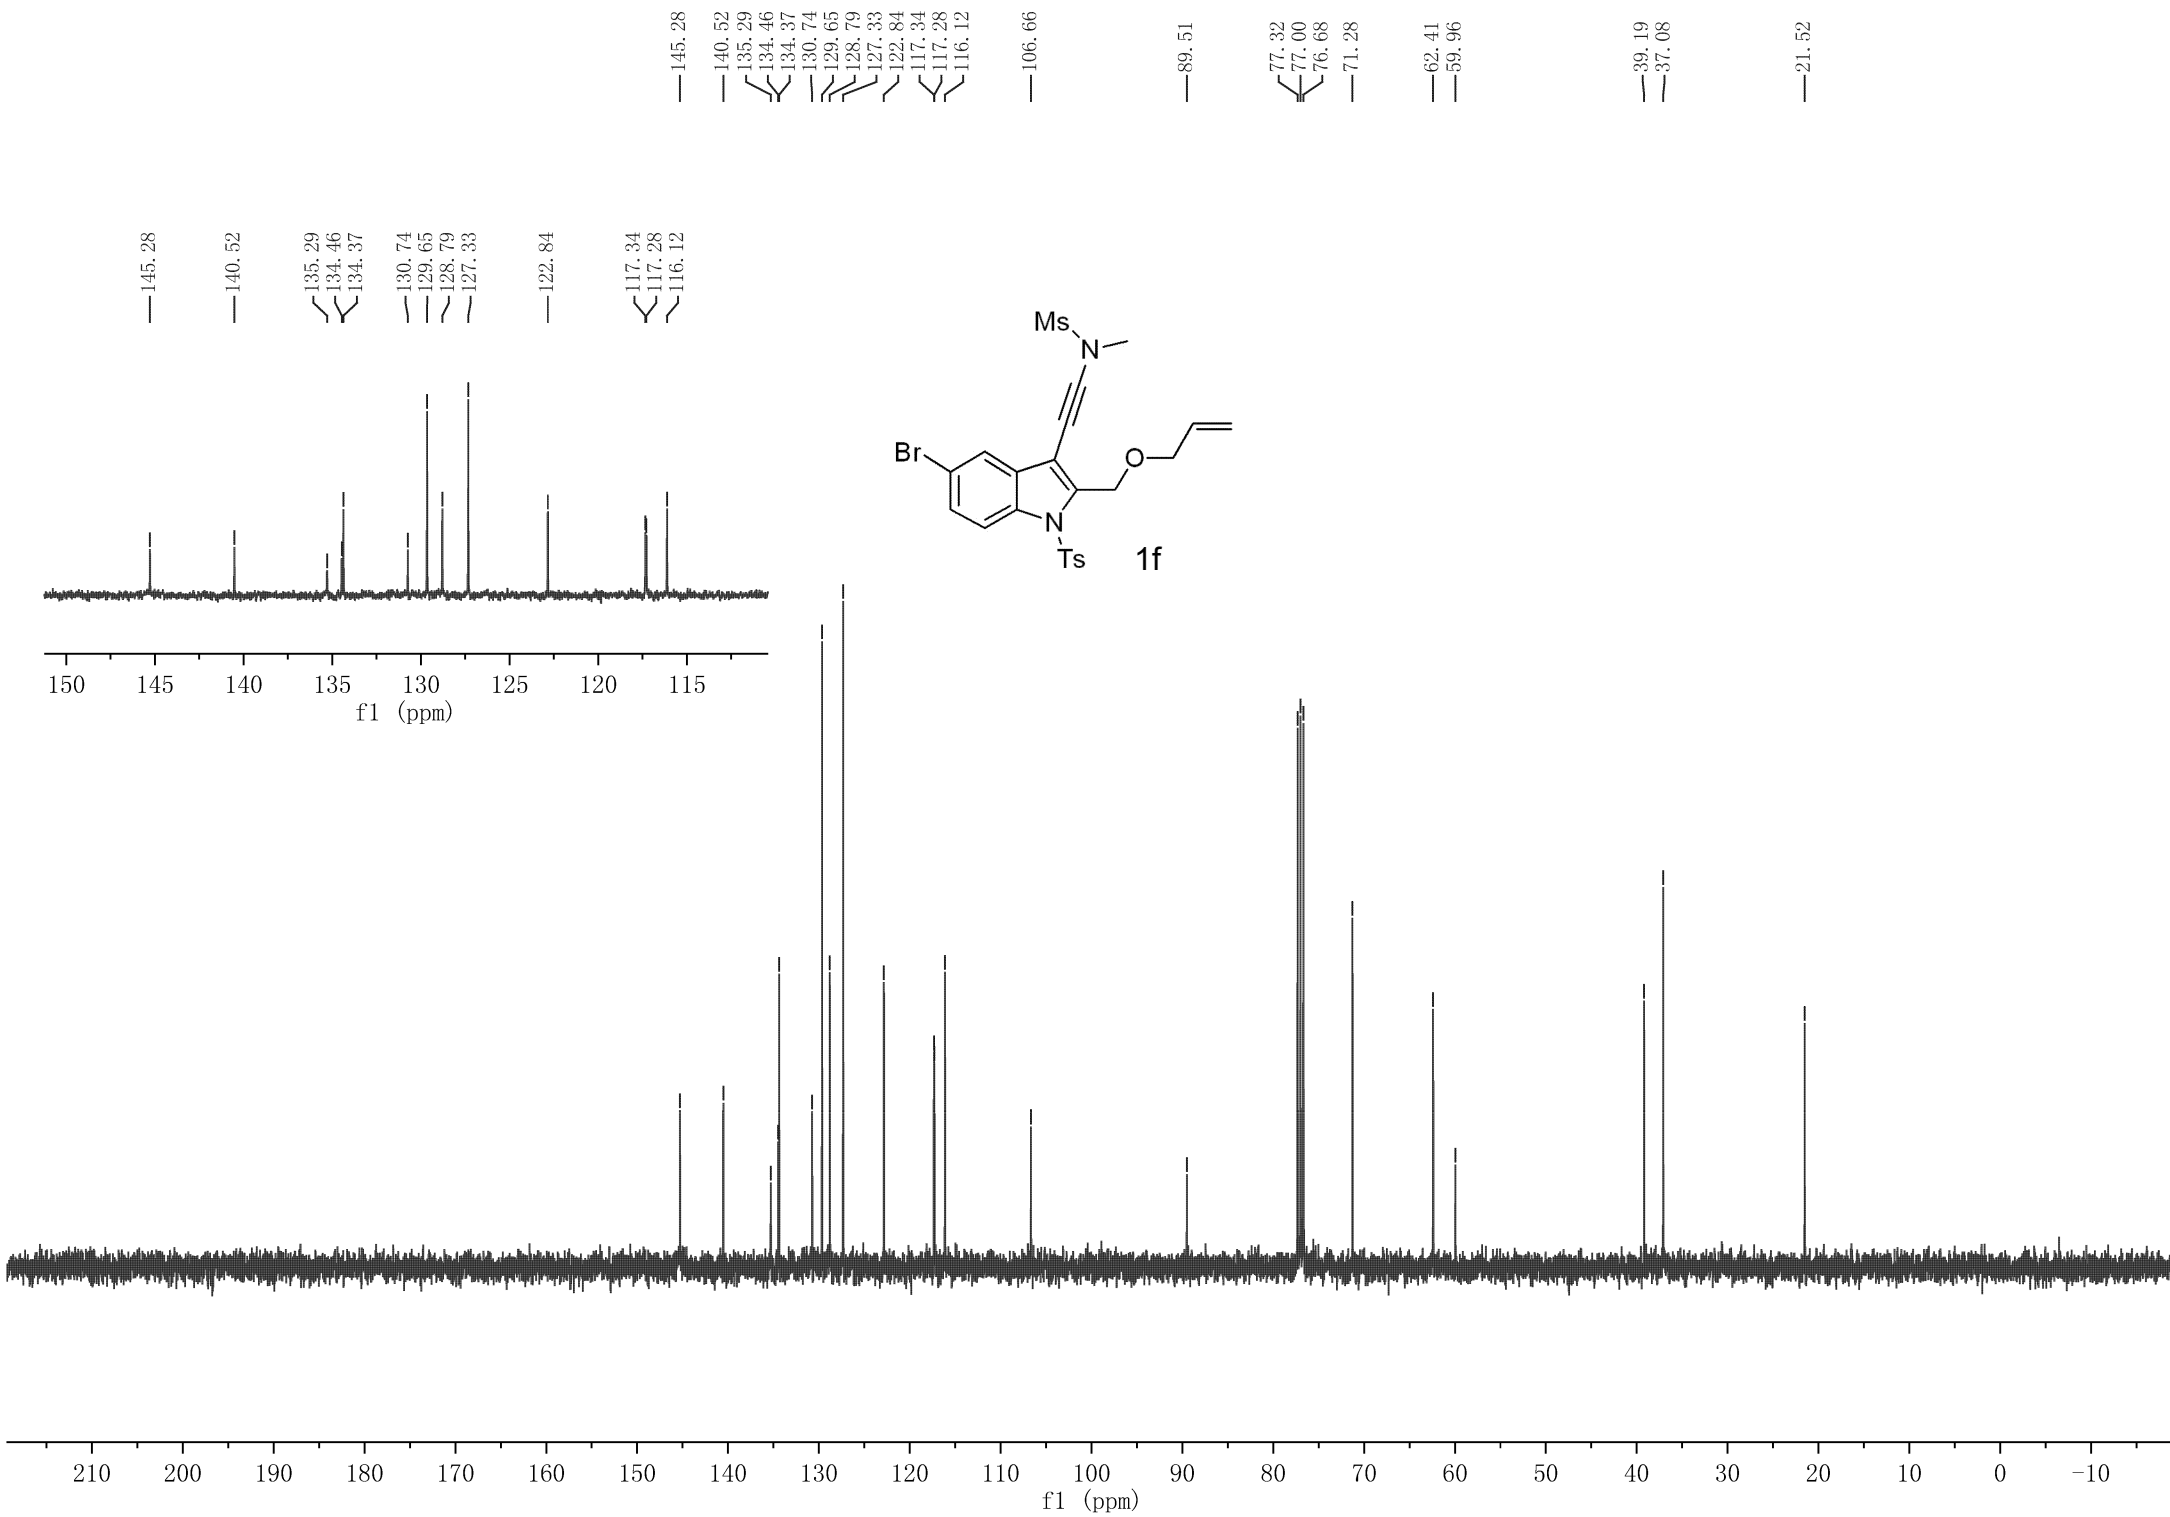

8.238  
8.216  
7.957  
7.936  
7.846  
7.609  
7.587  
7.260  
7.221  
7.200

5.979  
5.965  
5.952  
5.939  
5.922  
5.909  
5.896  
5.882  
5.337  
5.333  
5.294  
5.290  
5.229  
5.203  
5.031

4.071  
4.057

3.355  
3.147

2.346

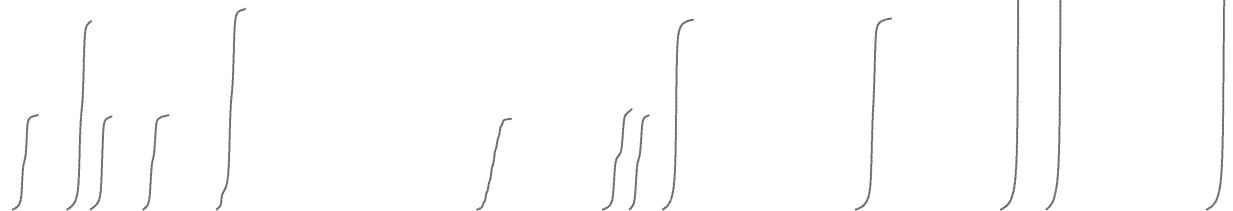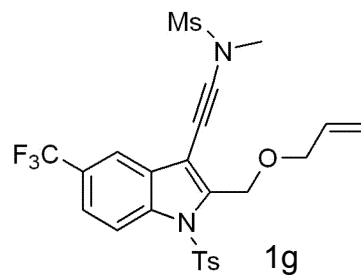

1.00  
1.99  
0.98  
0.99  
2.11

0.96  
1.06  
0.99  
2.00

2.01

3.01  
3.00

3.00

9.5 9.0 8.5 8.0 7.5 7.0 6.5 6.0 5.5 5.0 4.5 4.0 3.5 3.0 2.5 2.0 1.5 1.0 0.5 0.0 -0.5

f1 (ppm)

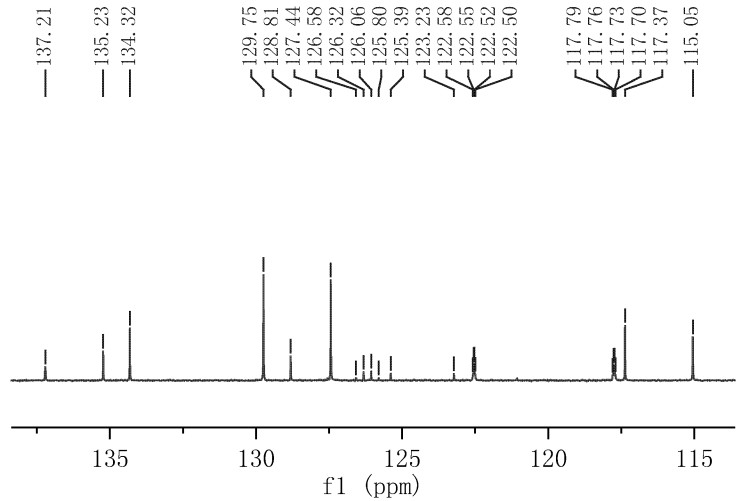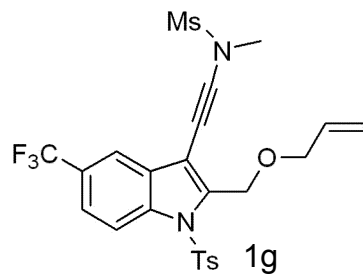

145.51  
141.22  
137.21  
135.23  
134.32  
129.75  
128.81  
127.44  
126.58  
126.32  
126.06  
125.80  
125.39  
123.23  
122.58  
122.55  
122.52  
122.50  
117.79  
117.76  
117.73  
117.70  
117.37  
115.05  
107.41

89.77

77.25  
77.00  
76.75  
71.33

62.41  
59.75

39.18  
37.15

21.54

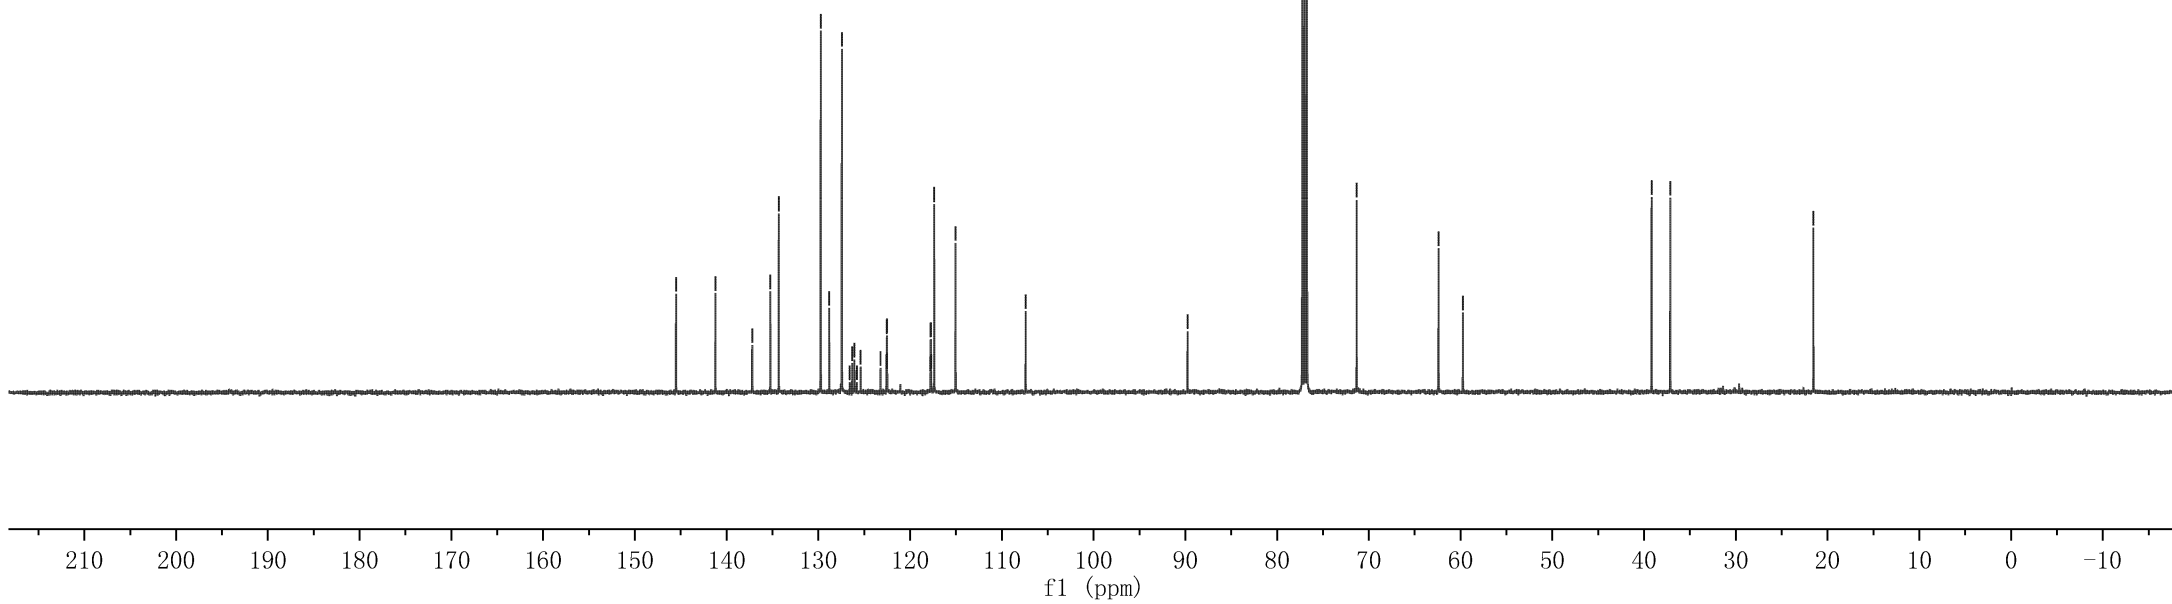

8.224  
8.222  
8.202  
8.200  
7.950  
7.929  
7.611  
7.607  
7.588  
7.580  
7.234  
7.213  
5.972  
5.958  
5.946  
5.944  
5.932  
5.929  
5.917  
5.915  
5.903  
5.900  
5.888  
5.874  
5.337  
5.333  
5.294  
5.290  
5.238  
5.235  
5.231  
5.209  
5.205  
5.073  
4.070  
4.066  
4.059  
4.056  
4.052  
3.350  
3.147  
2.359

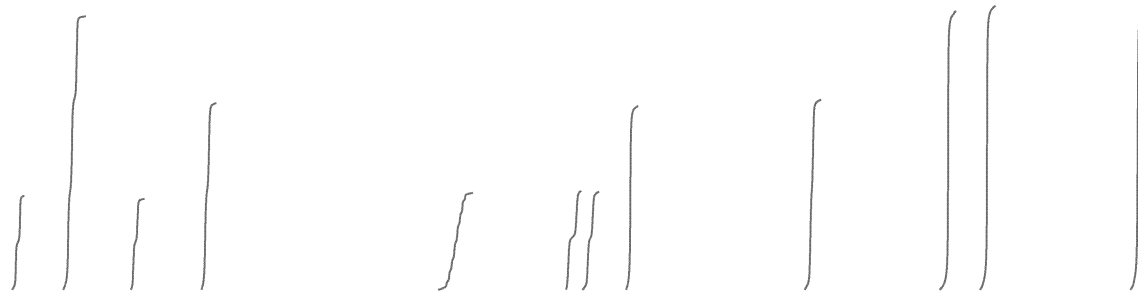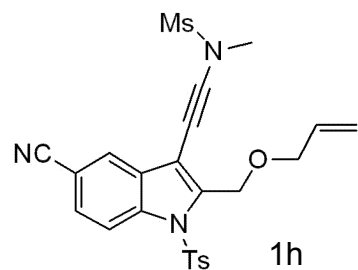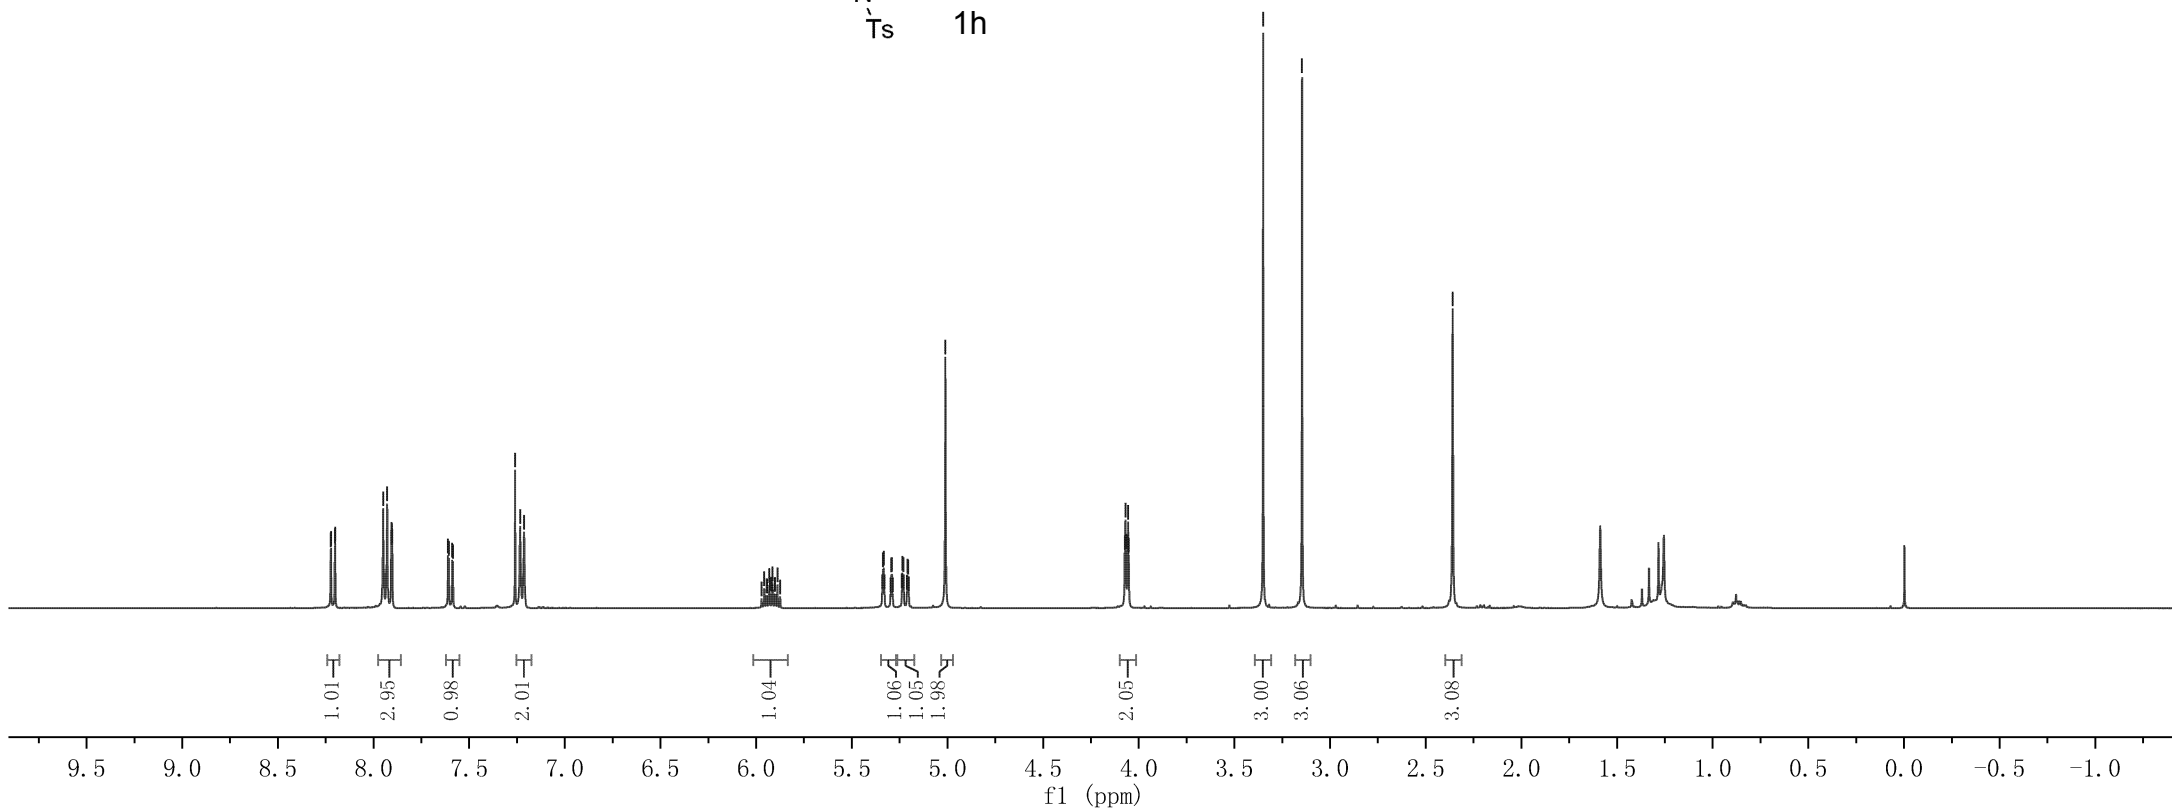

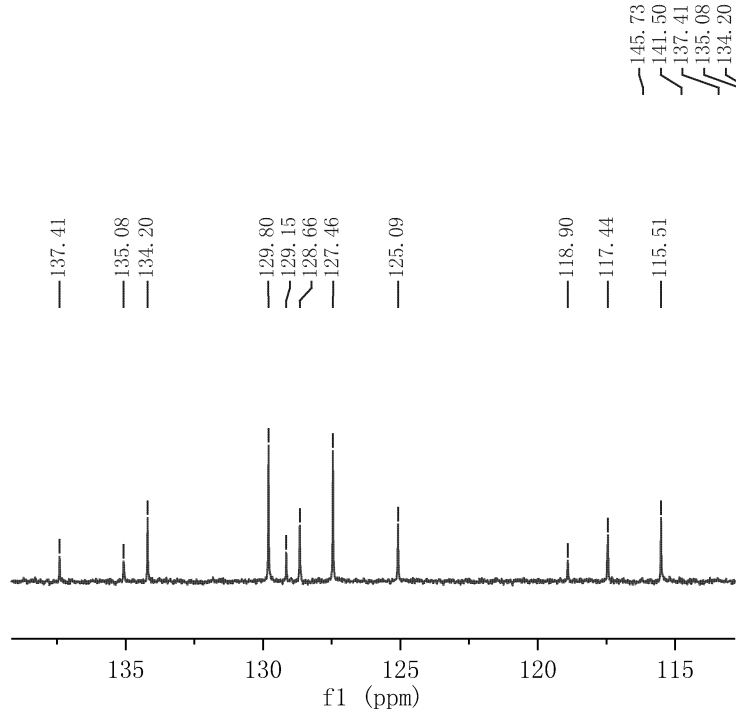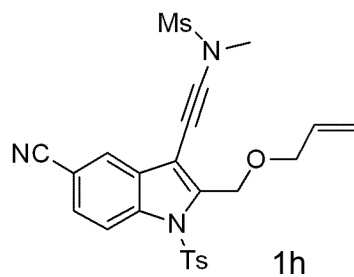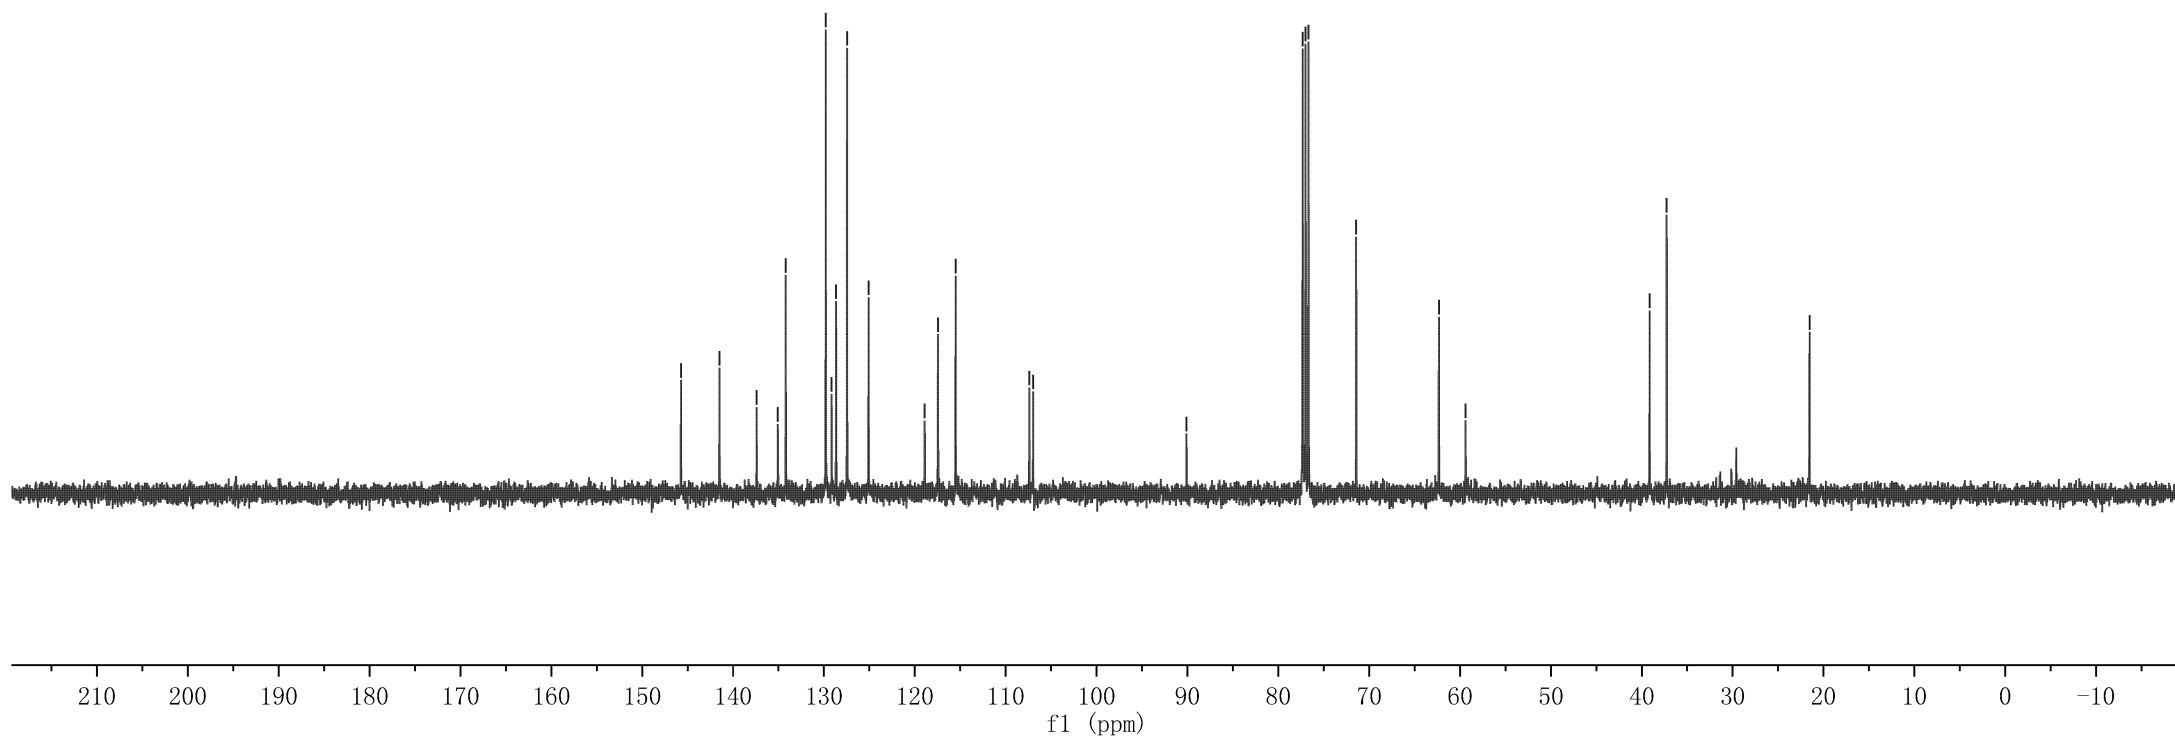



8.265  
8.262  
8.168  
8.146  
8.045  
8.041  
8.023  
8.019  
7.944  
7.923

7.260  
7.199  
7.179

5.974  
5.960  
5.947  
5.934  
5.917  
5.904  
5.890  
5.876  
5.332  
5.328  
5.324  
5.289  
5.285  
5.281  
5.219  
5.216  
5.193  
5.190  
5.012

4.068  
4.065  
4.057  
4.054  
3.929

3.350  
3.149

2.329

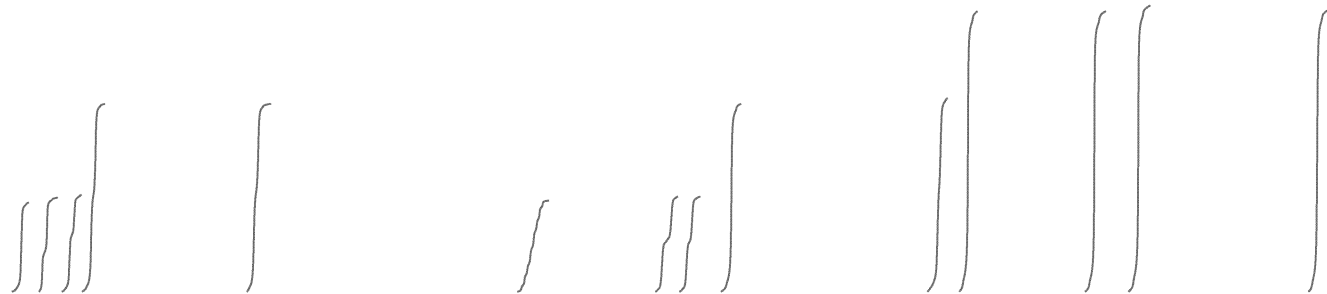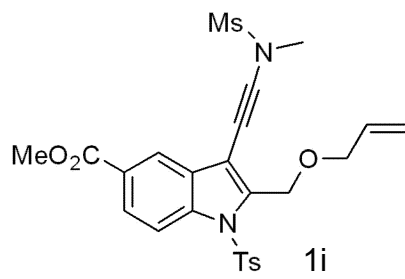

0.95  
1.00  
1.03  
2.00

2.00

0.97

1.02  
1.01  
2.00

2.06  
2.99

2.99  
3.05

3.00

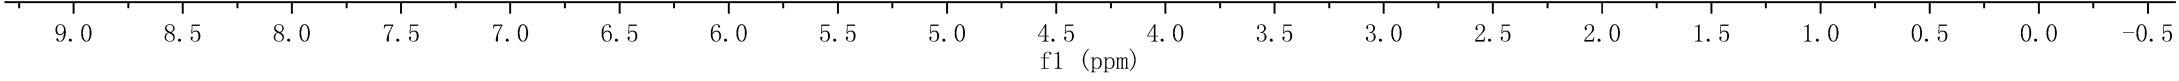

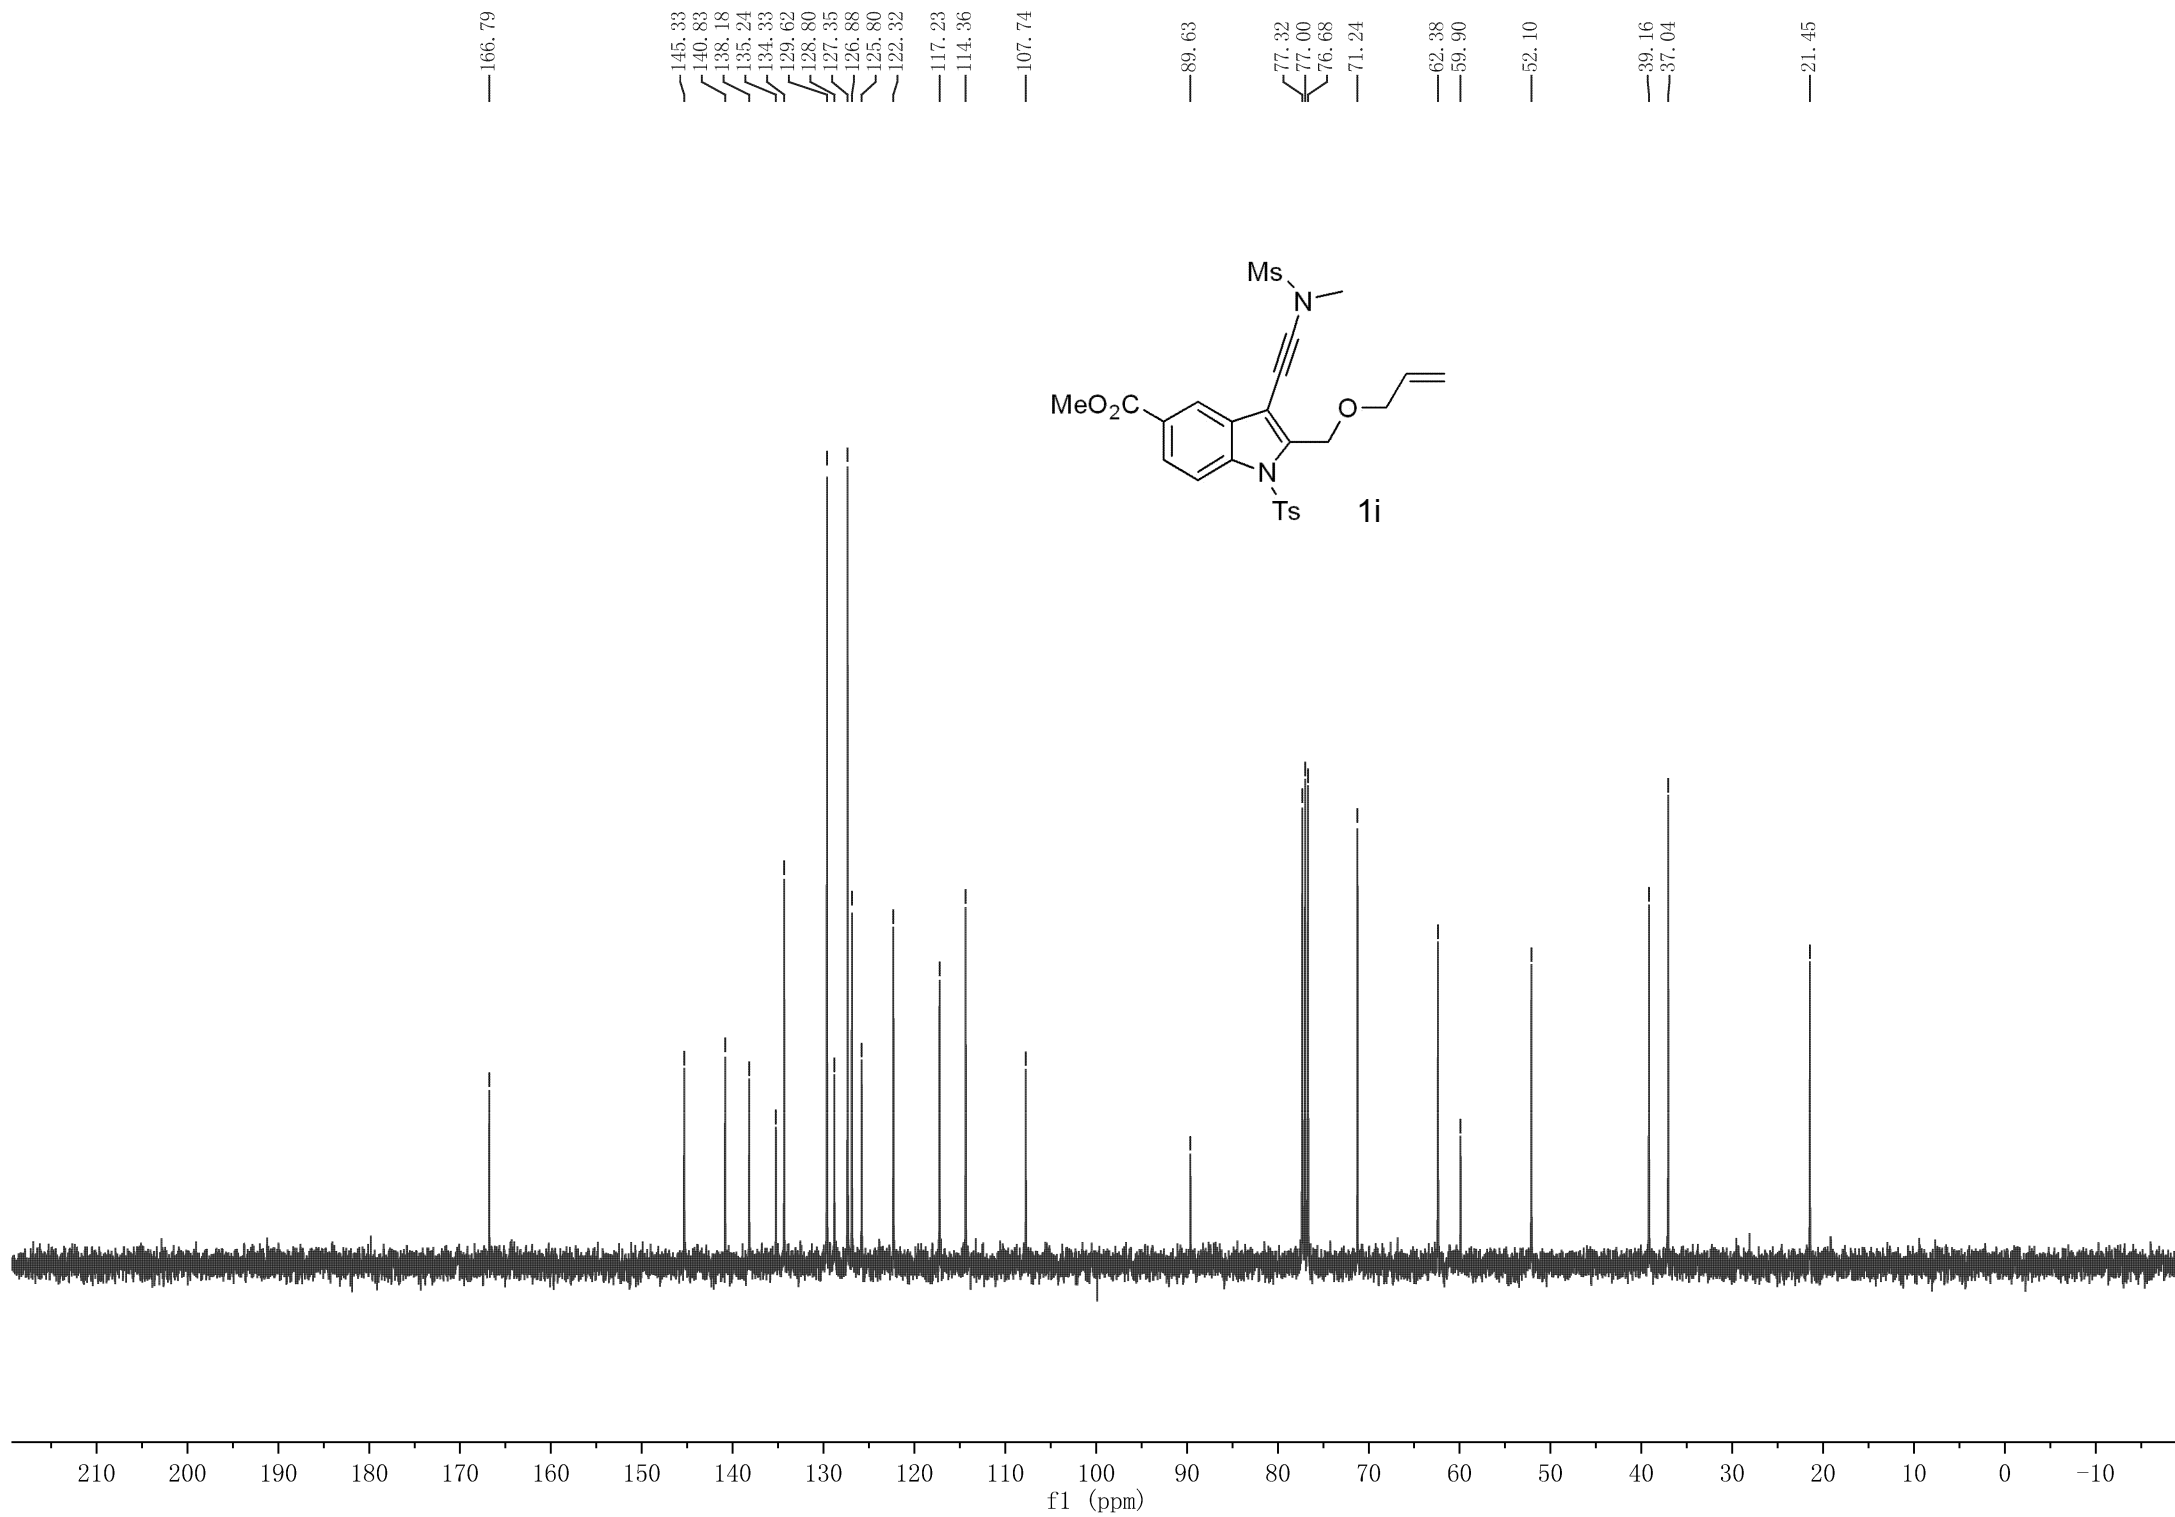

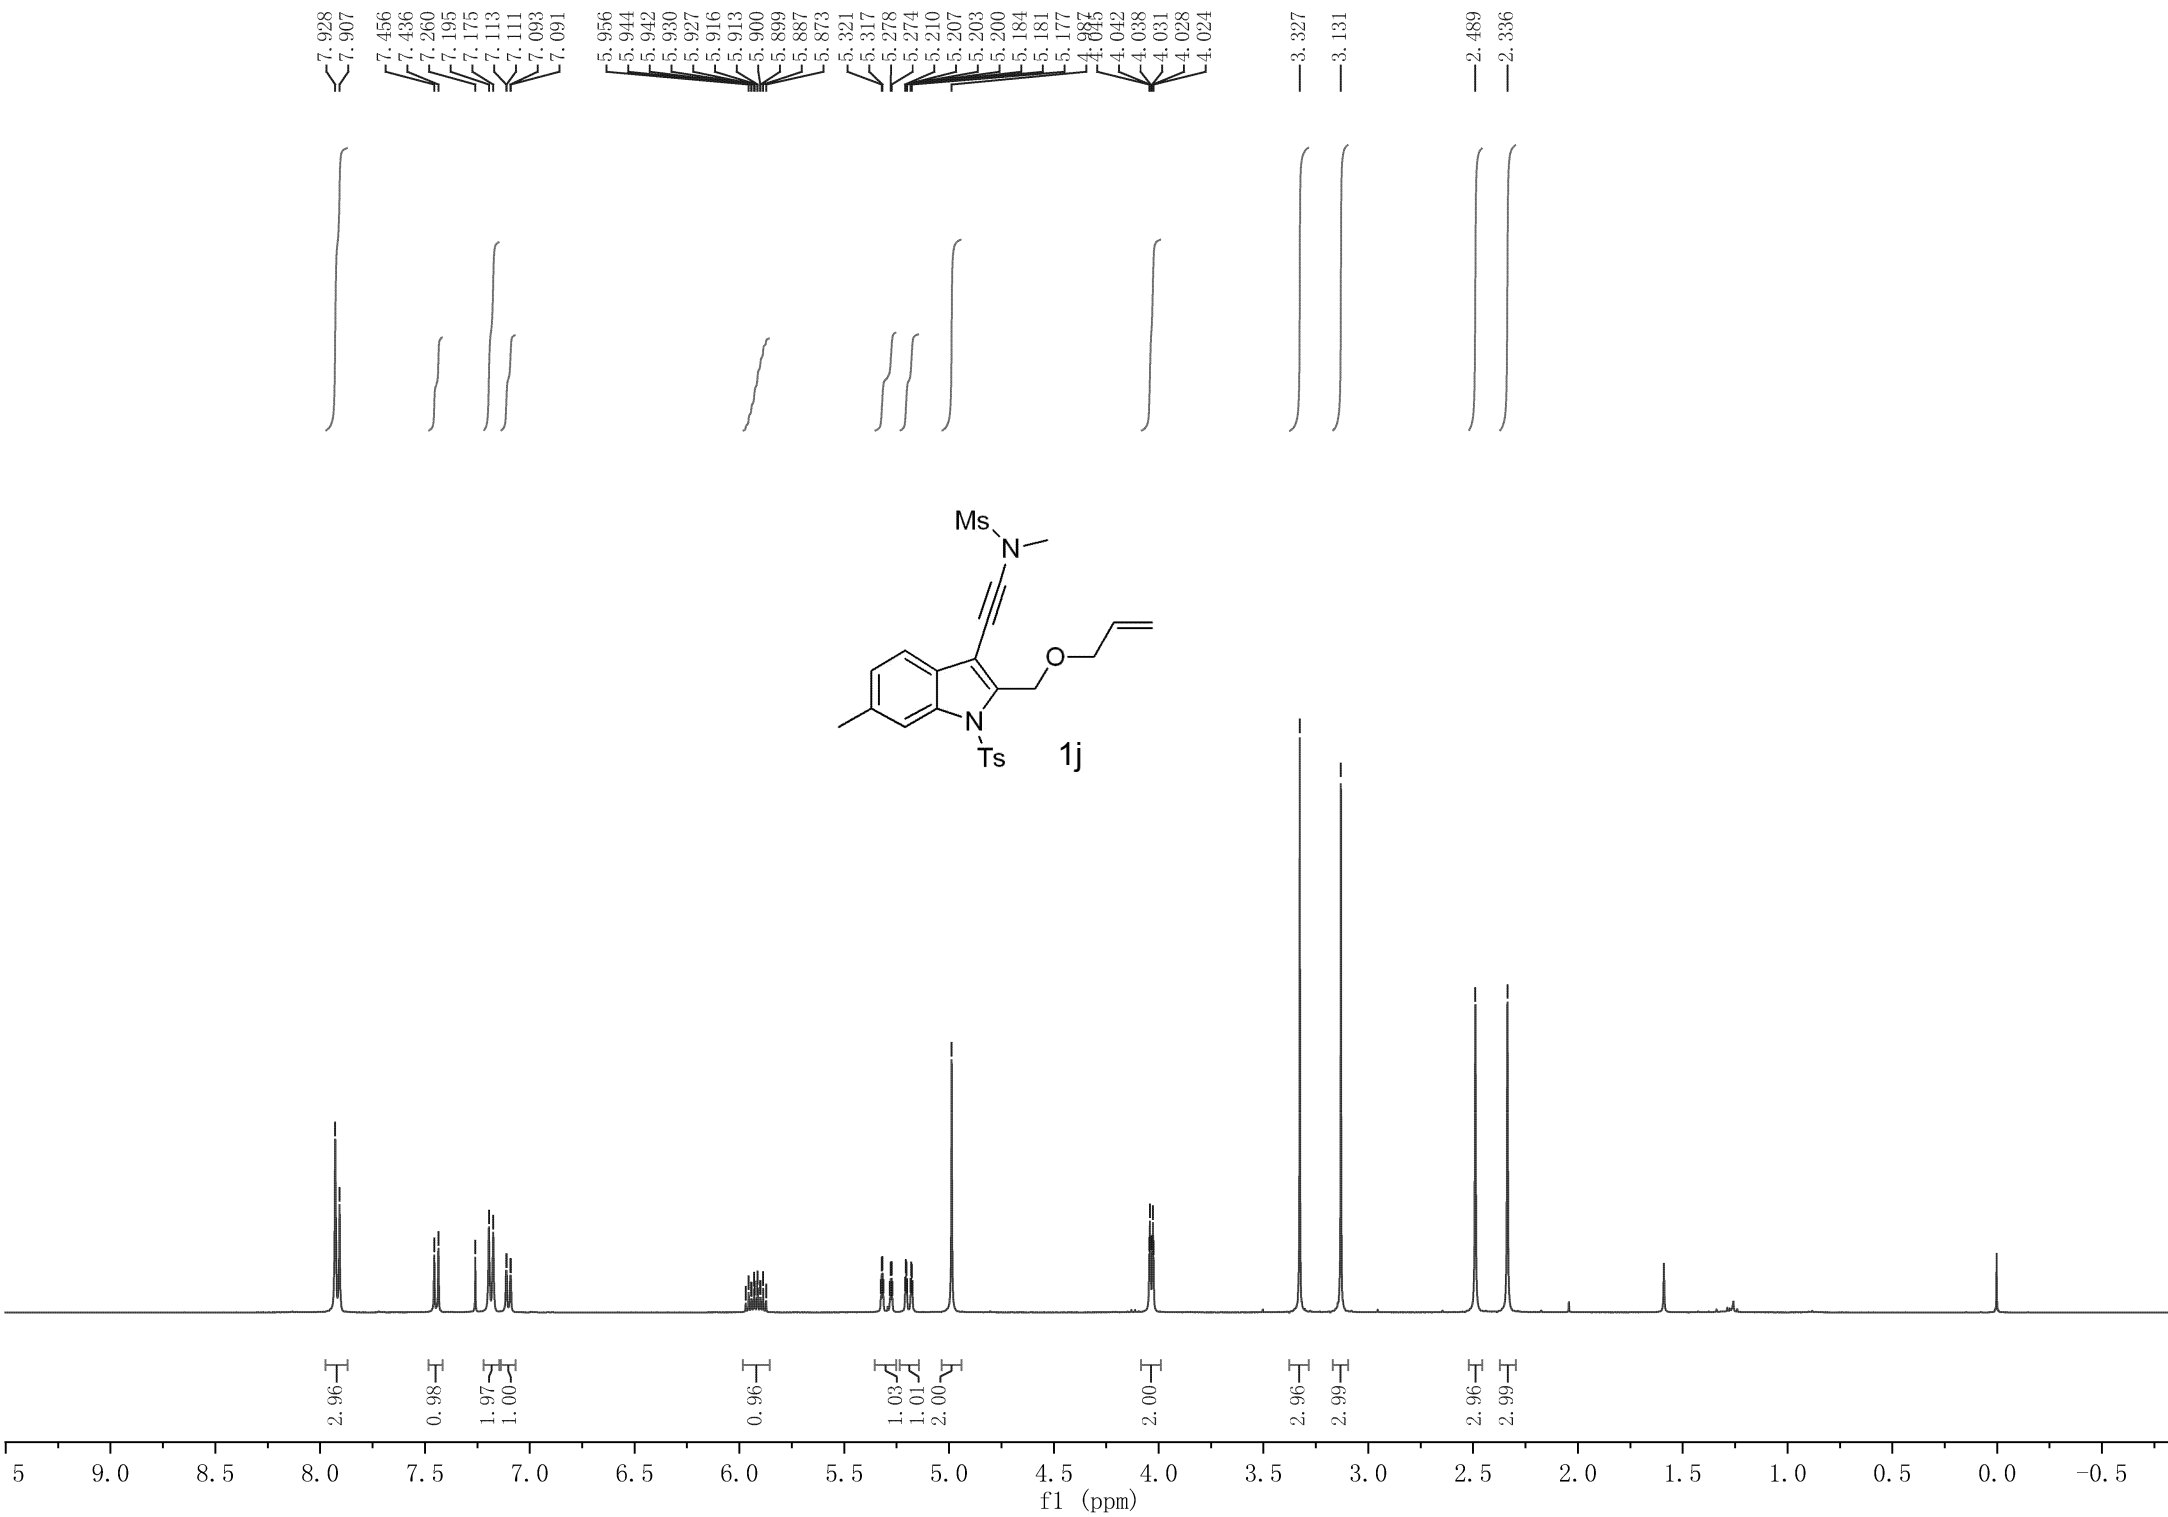

144.82  
138.56  
136.16  
135.73  
134.54  
129.50  
127.21  
126.76  
125.33  
119.72  
117.01  
114.63  
107.46  
89.10  
77.32  
77.00  
76.68  
70.98  
62.58  
60.78  
39.19  
36.85  
22.05  
21.45

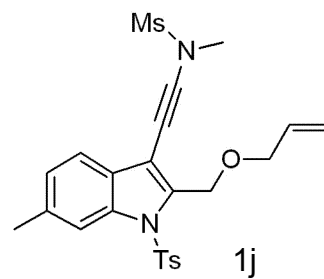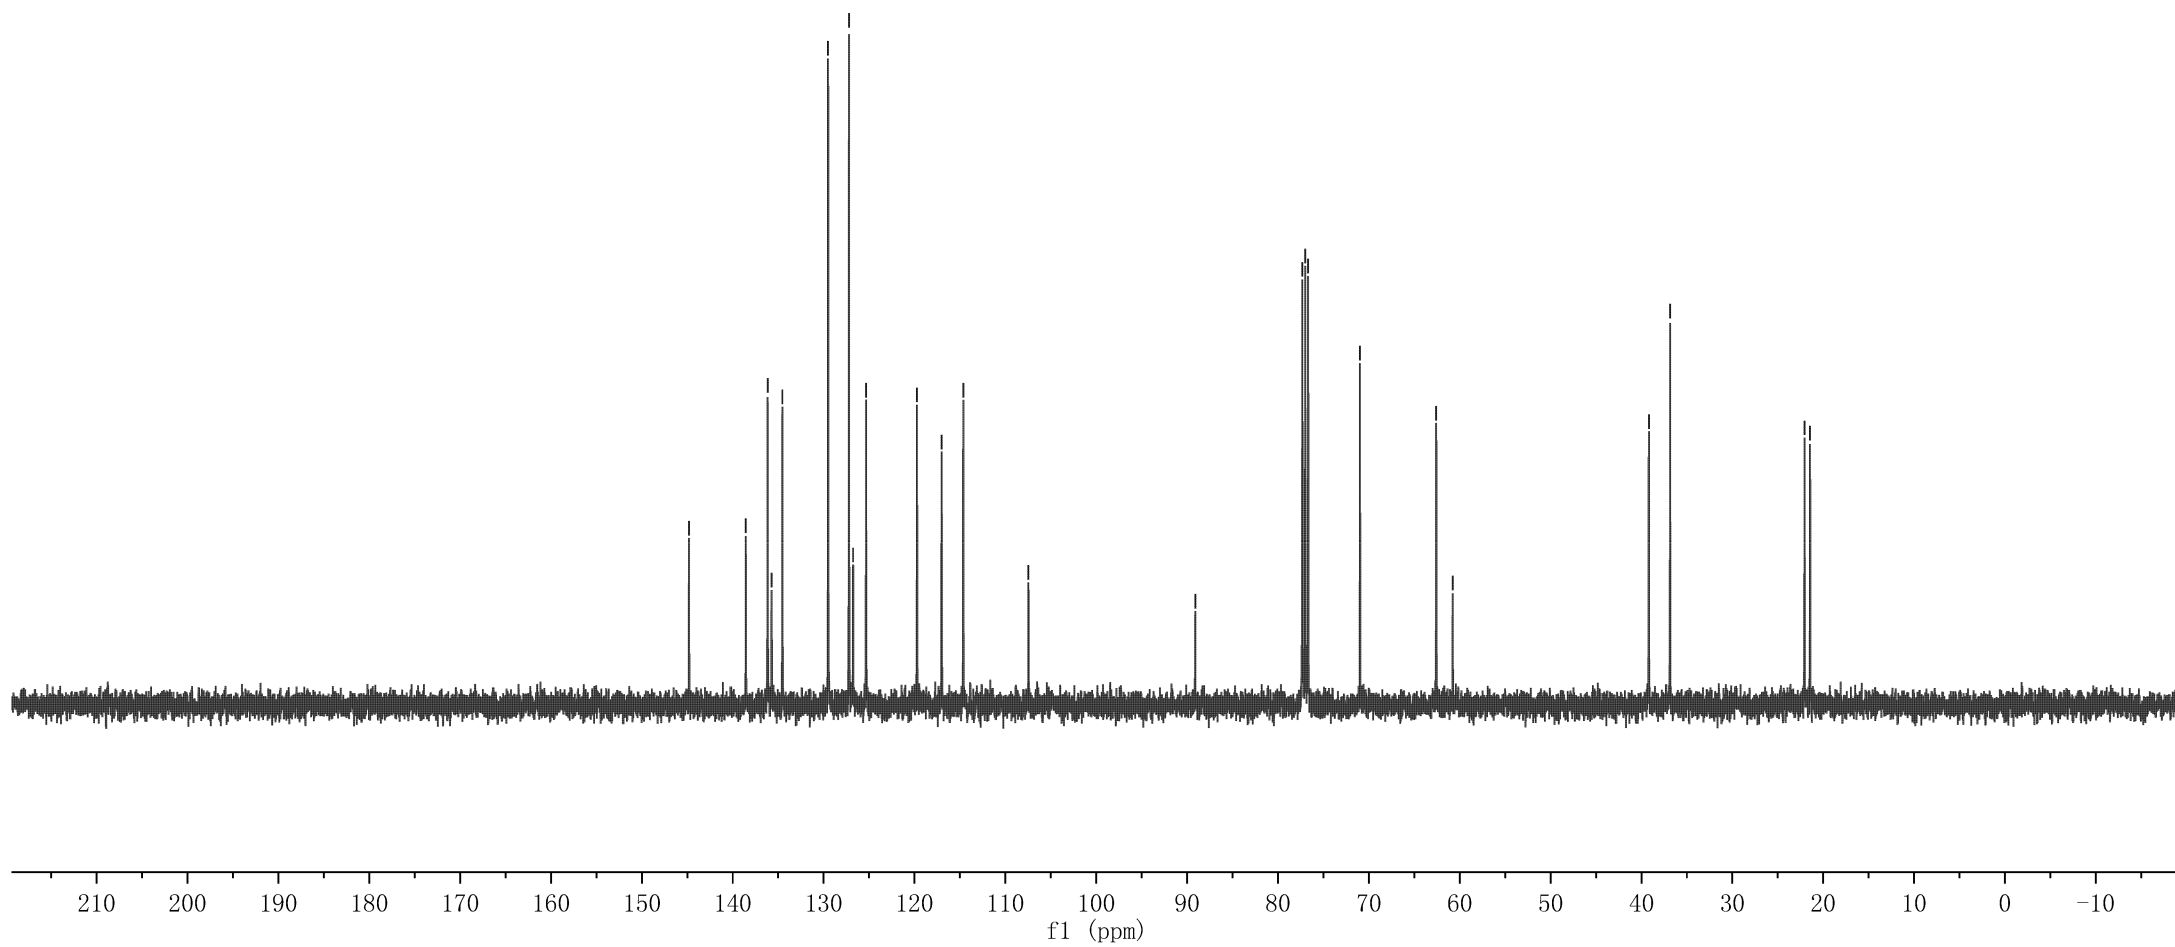

7.918  
7.902  
7.657  
7.653  
7.445  
7.427  
7.260  
7.191  
7.175  
6.913  
6.909  
6.896  
6.891  
5.964  
5.952  
5.943  
5.932  
5.929  
5.918  
5.908  
5.897  
5.886  
5.320  
5.317  
5.282  
5.204  
5.201  
5.199  
4.044  
4.041  
4.039  
4.033  
4.030  
4.027  
3.879  
3.320  
3.126  
2.333

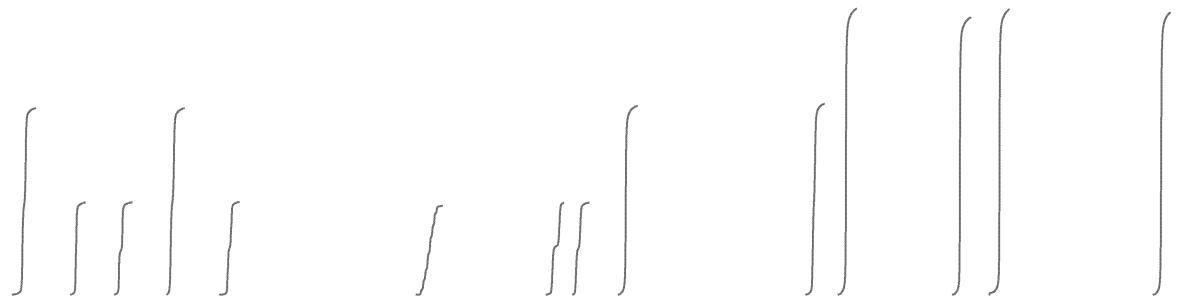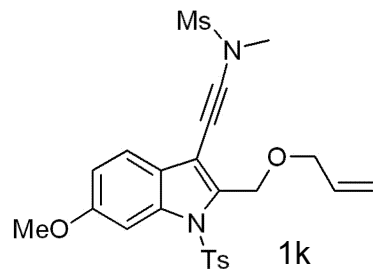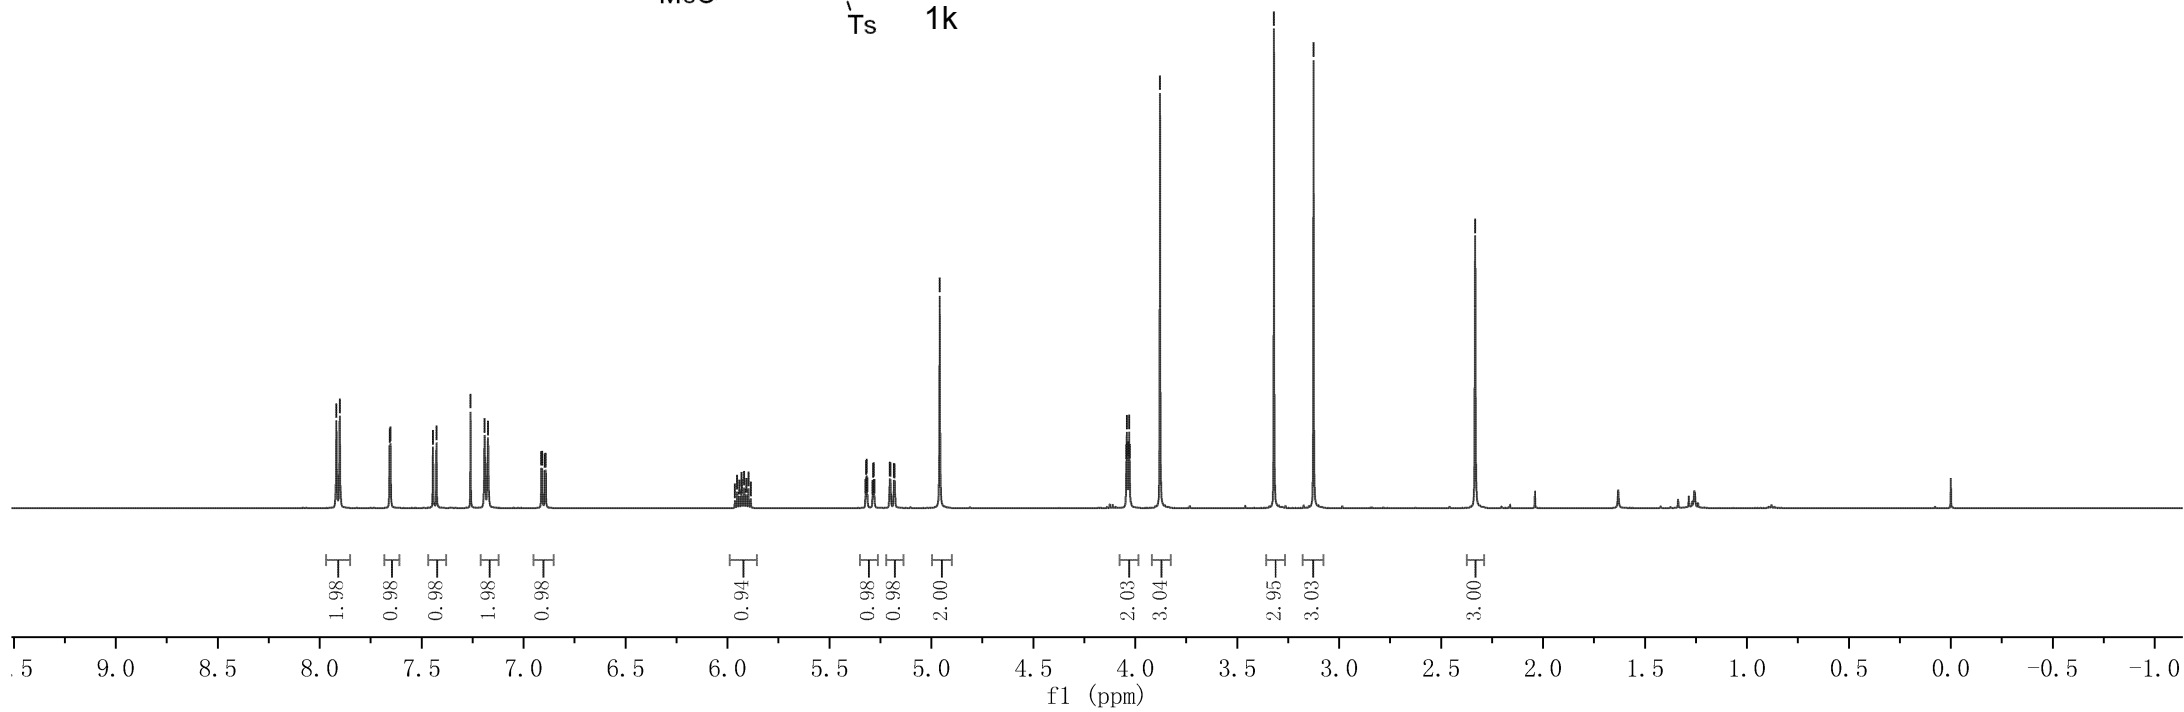

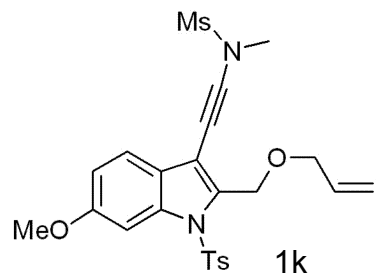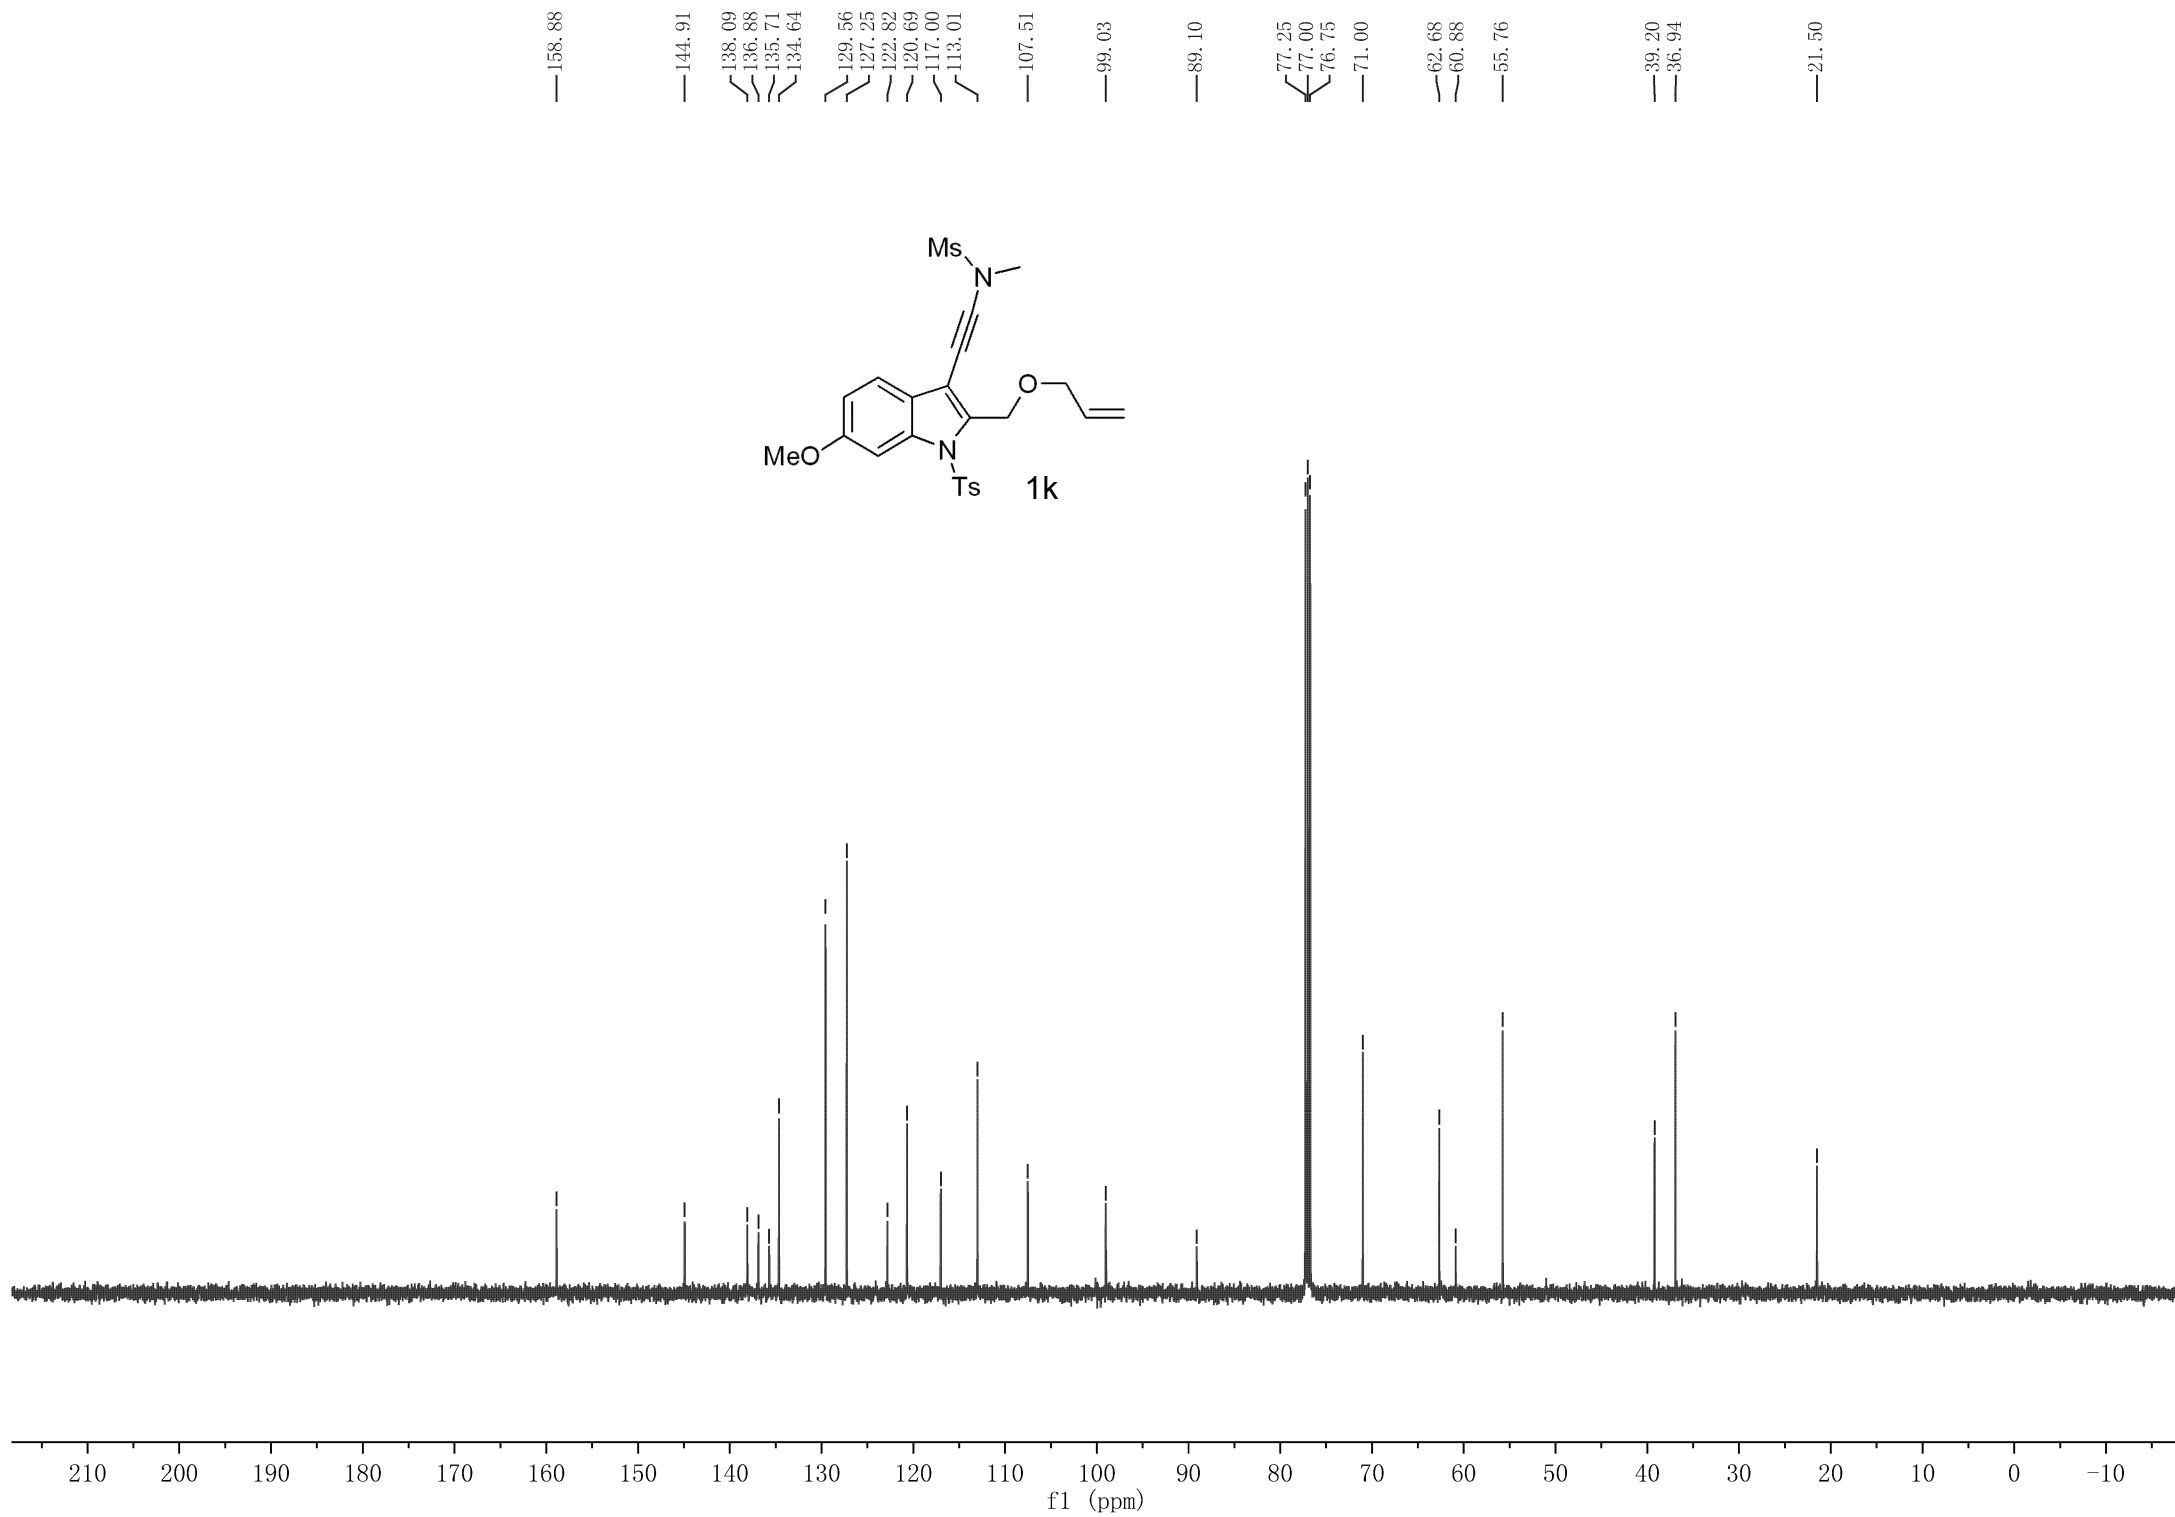

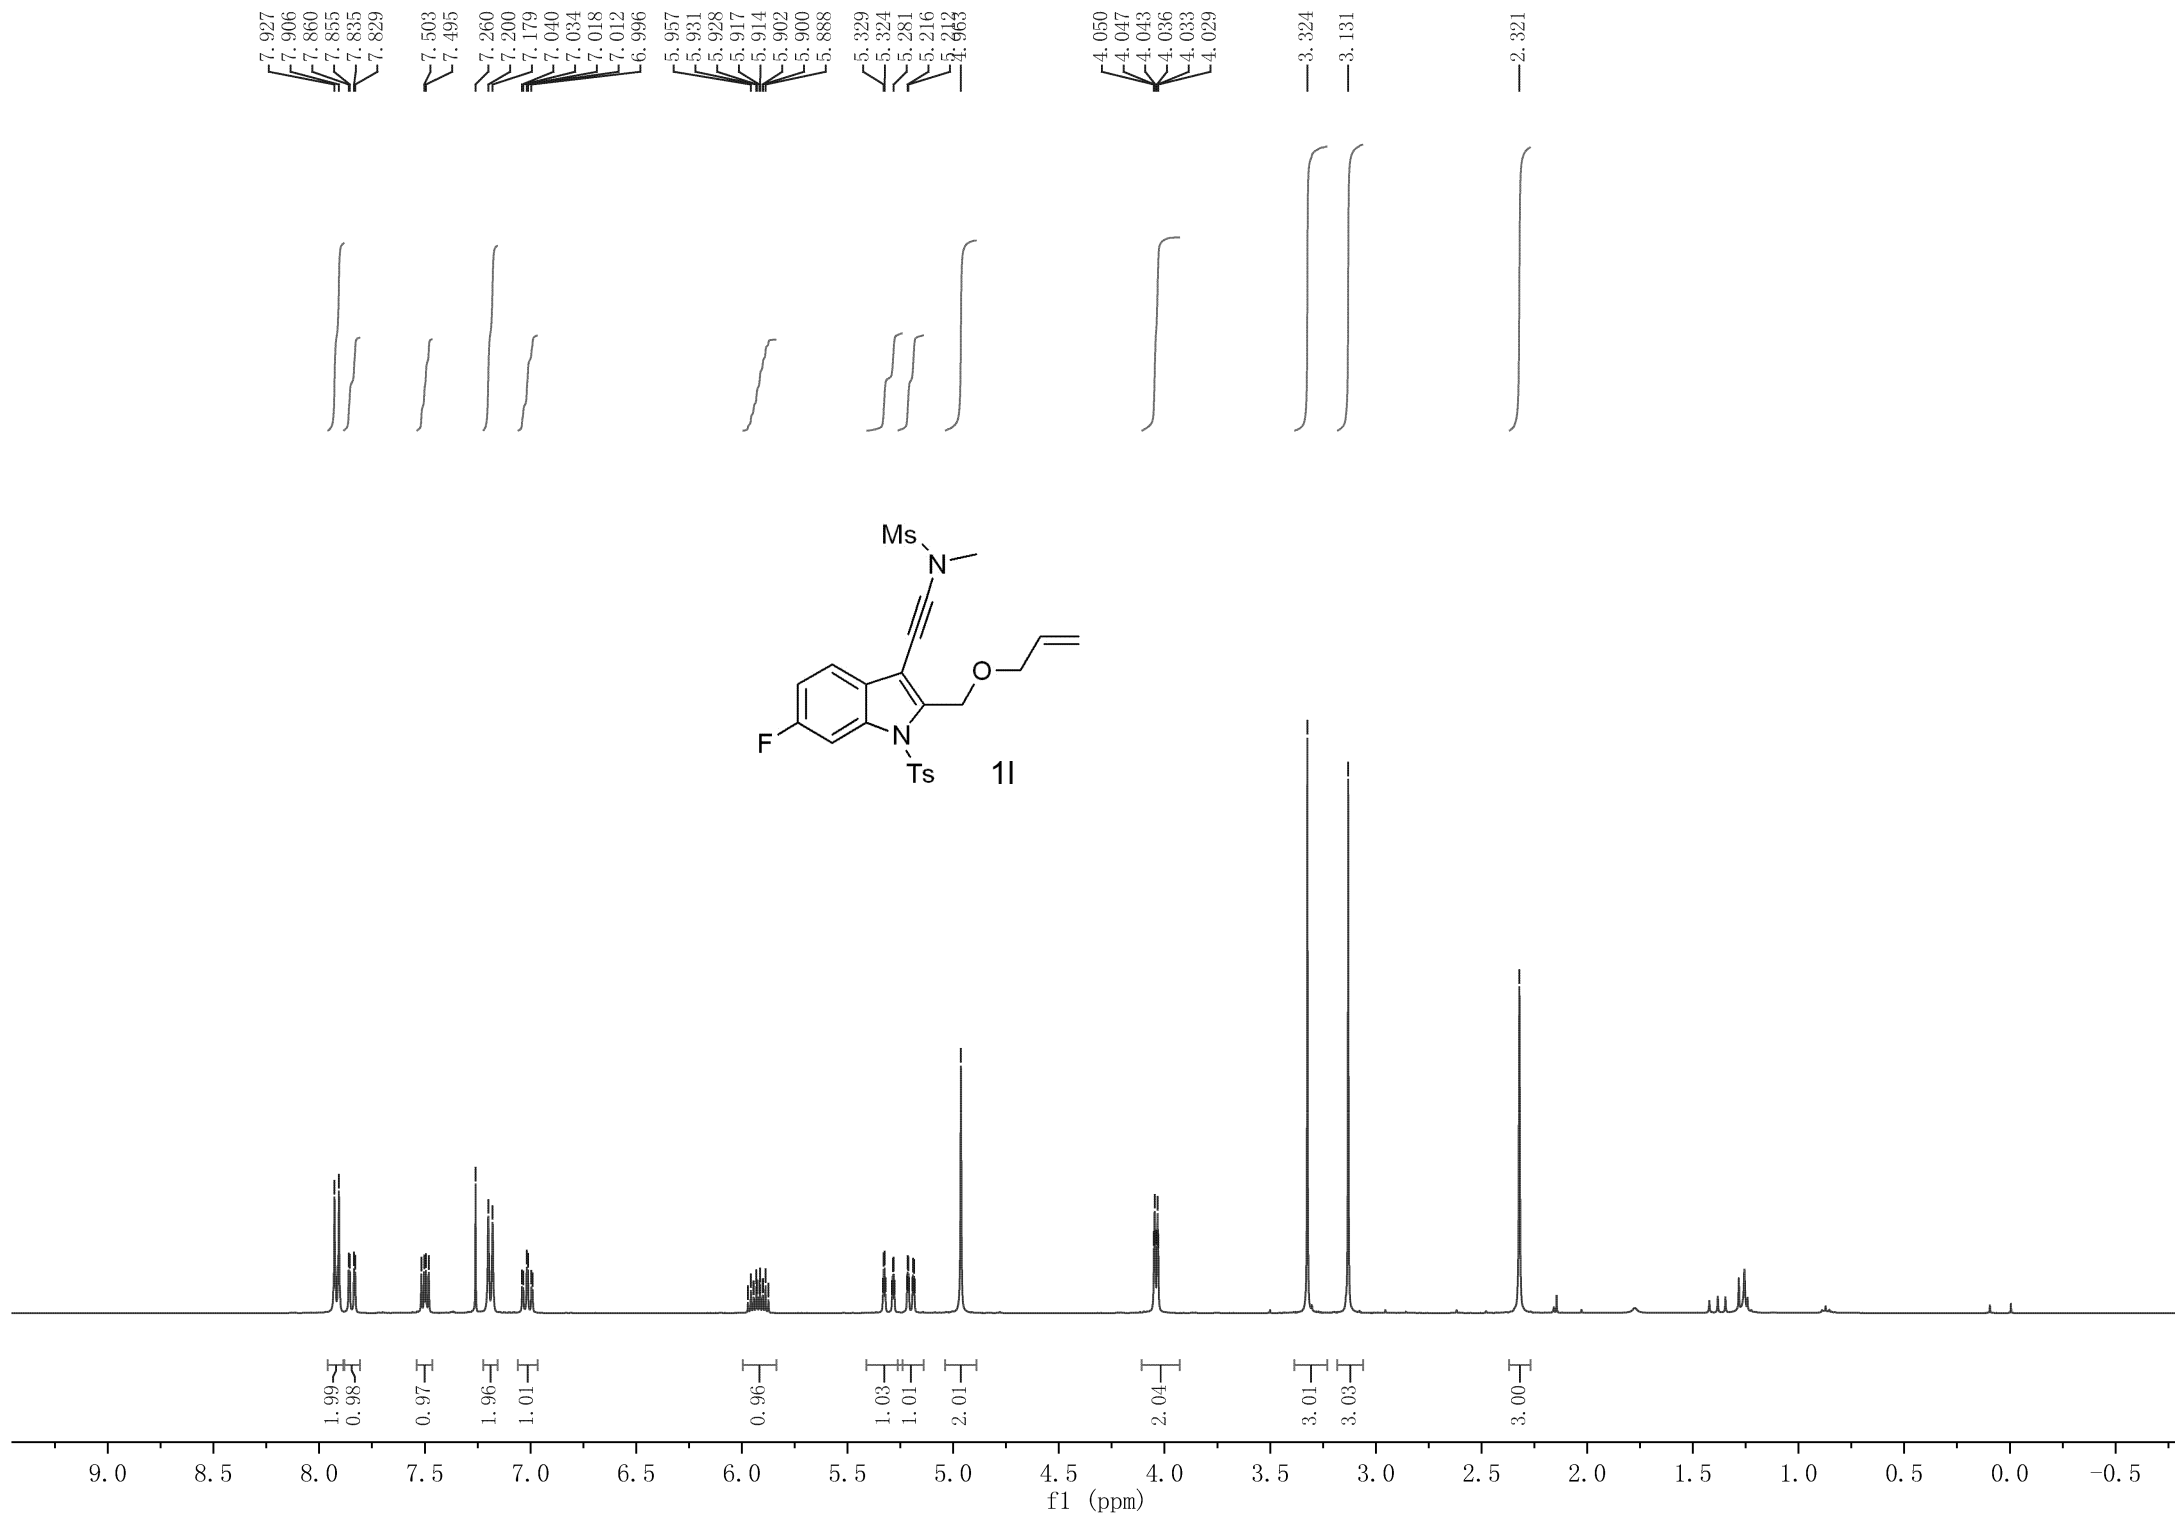

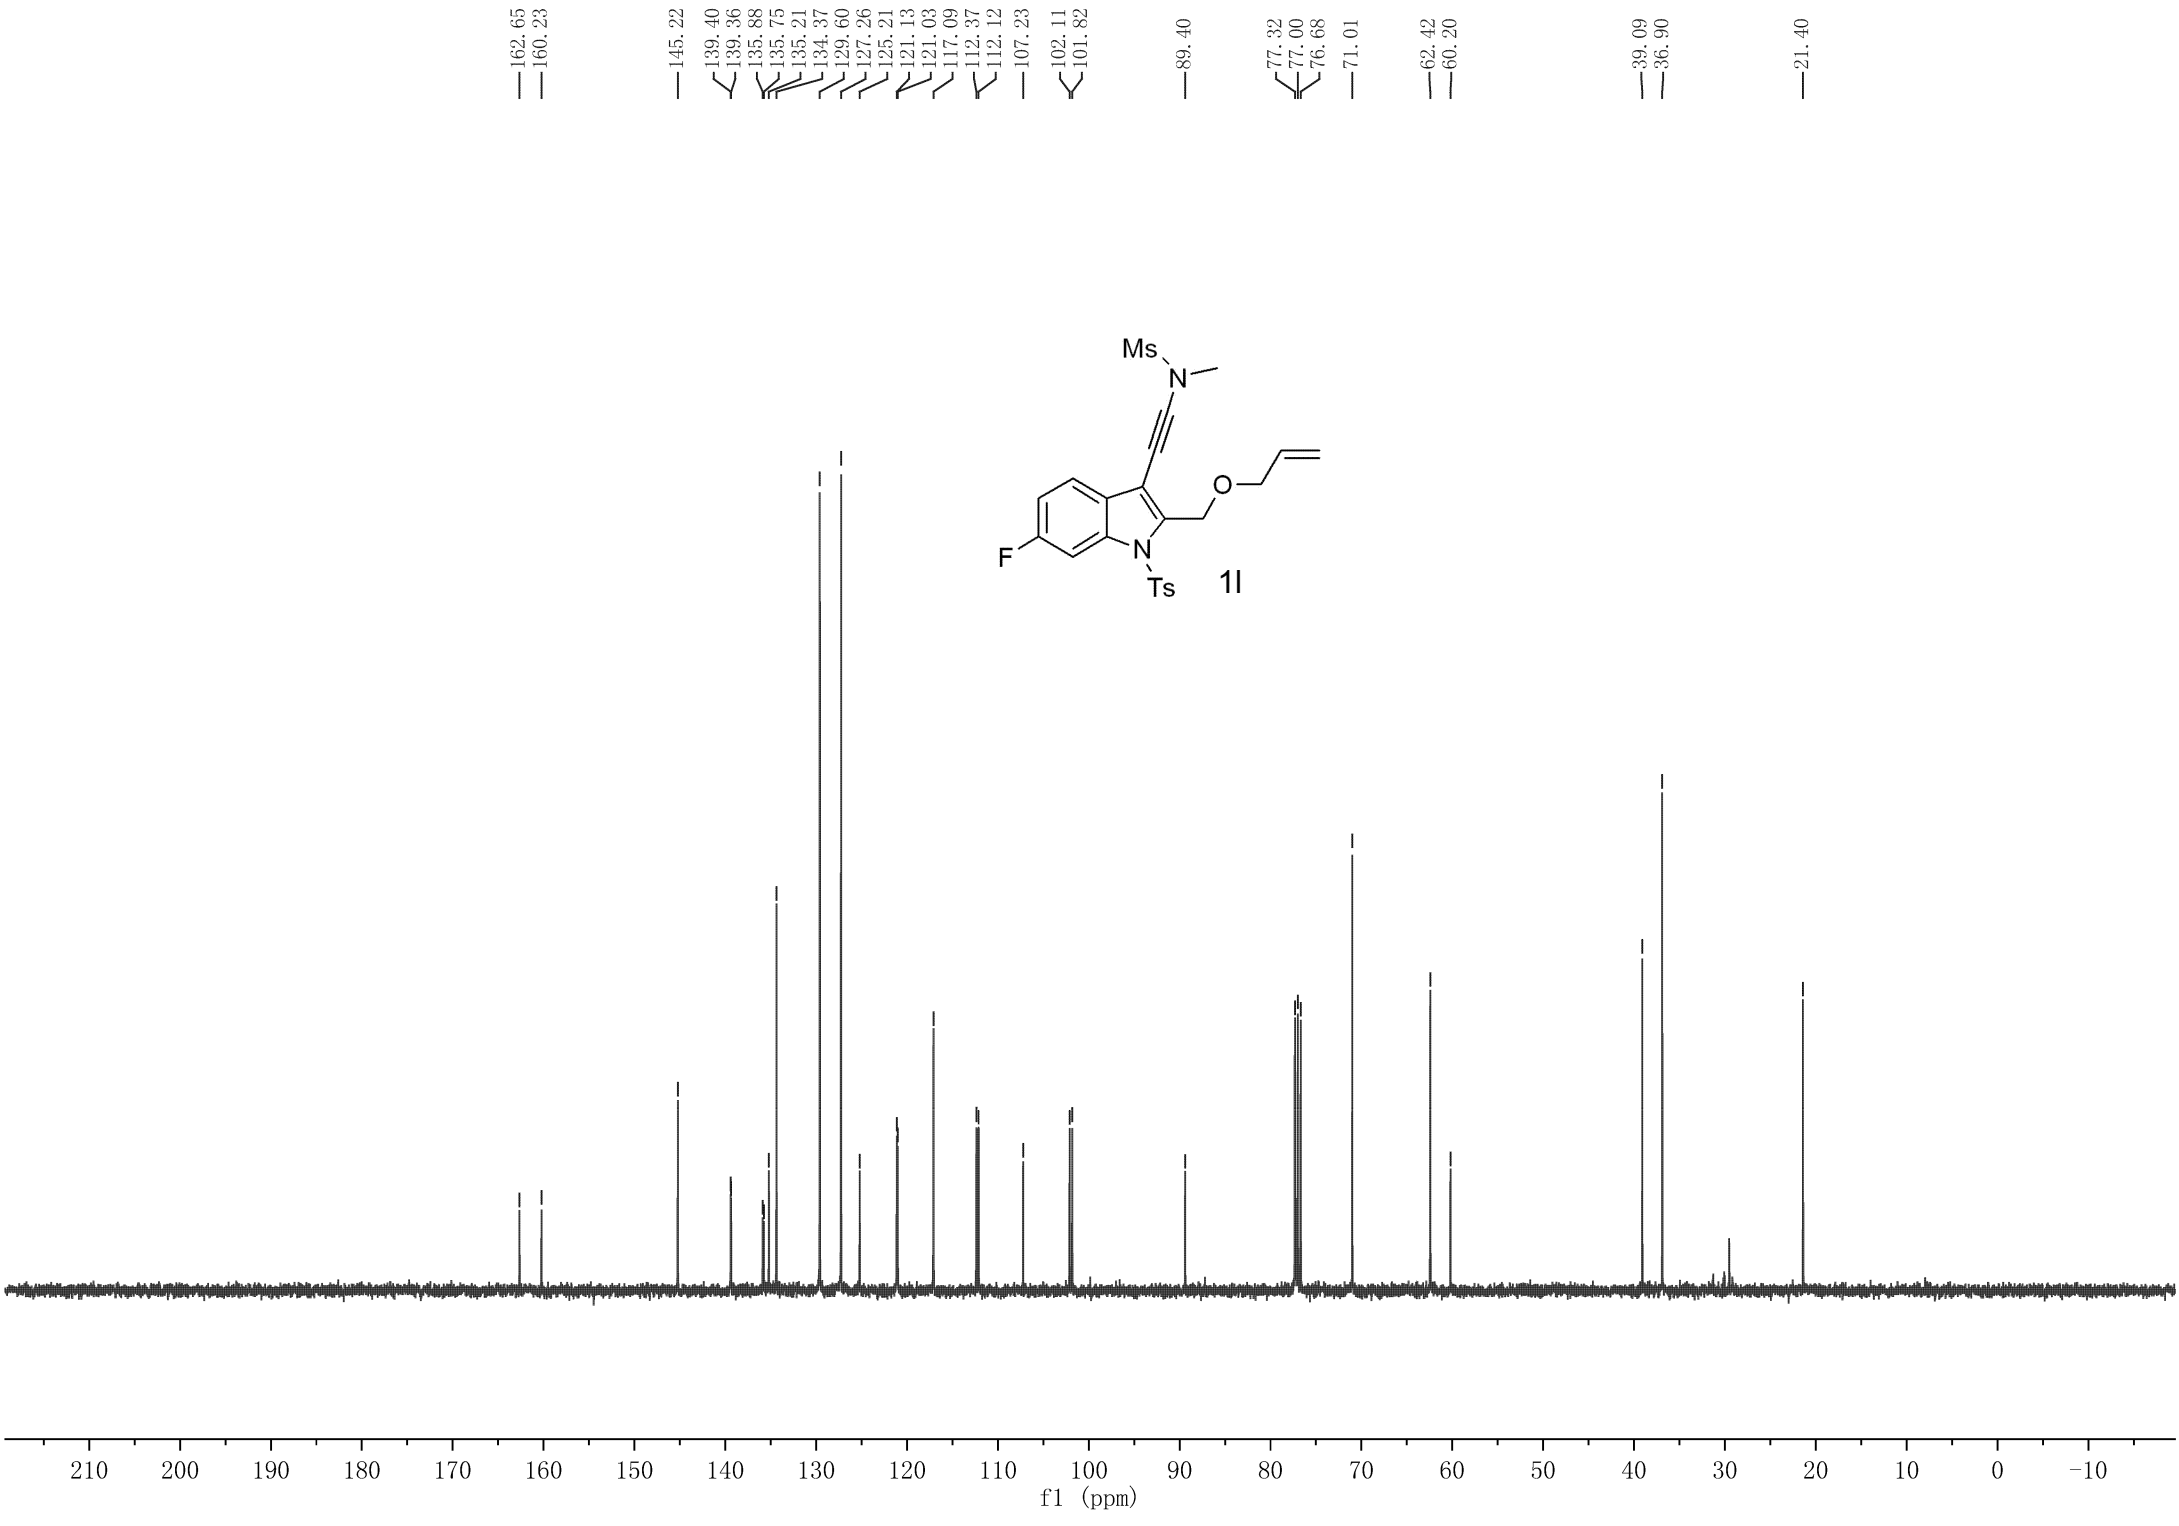



8.056  
8.034  
7.913  
7.892  
7.532  
7.527  
7.320  
7.315  
7.297  
7.292  
7.260  
7.200  
7.179

5.974  
5.960  
5.947  
5.934  
5.917  
5.904  
5.891  
5.877  
5.331  
5.328  
5.221  
5.218  
4.985  
4.985

4.059  
4.045

3.333  
3.136

2.336

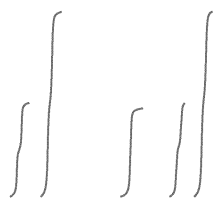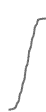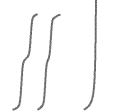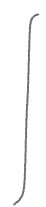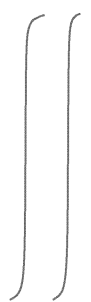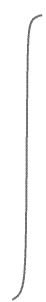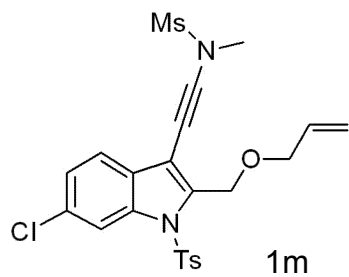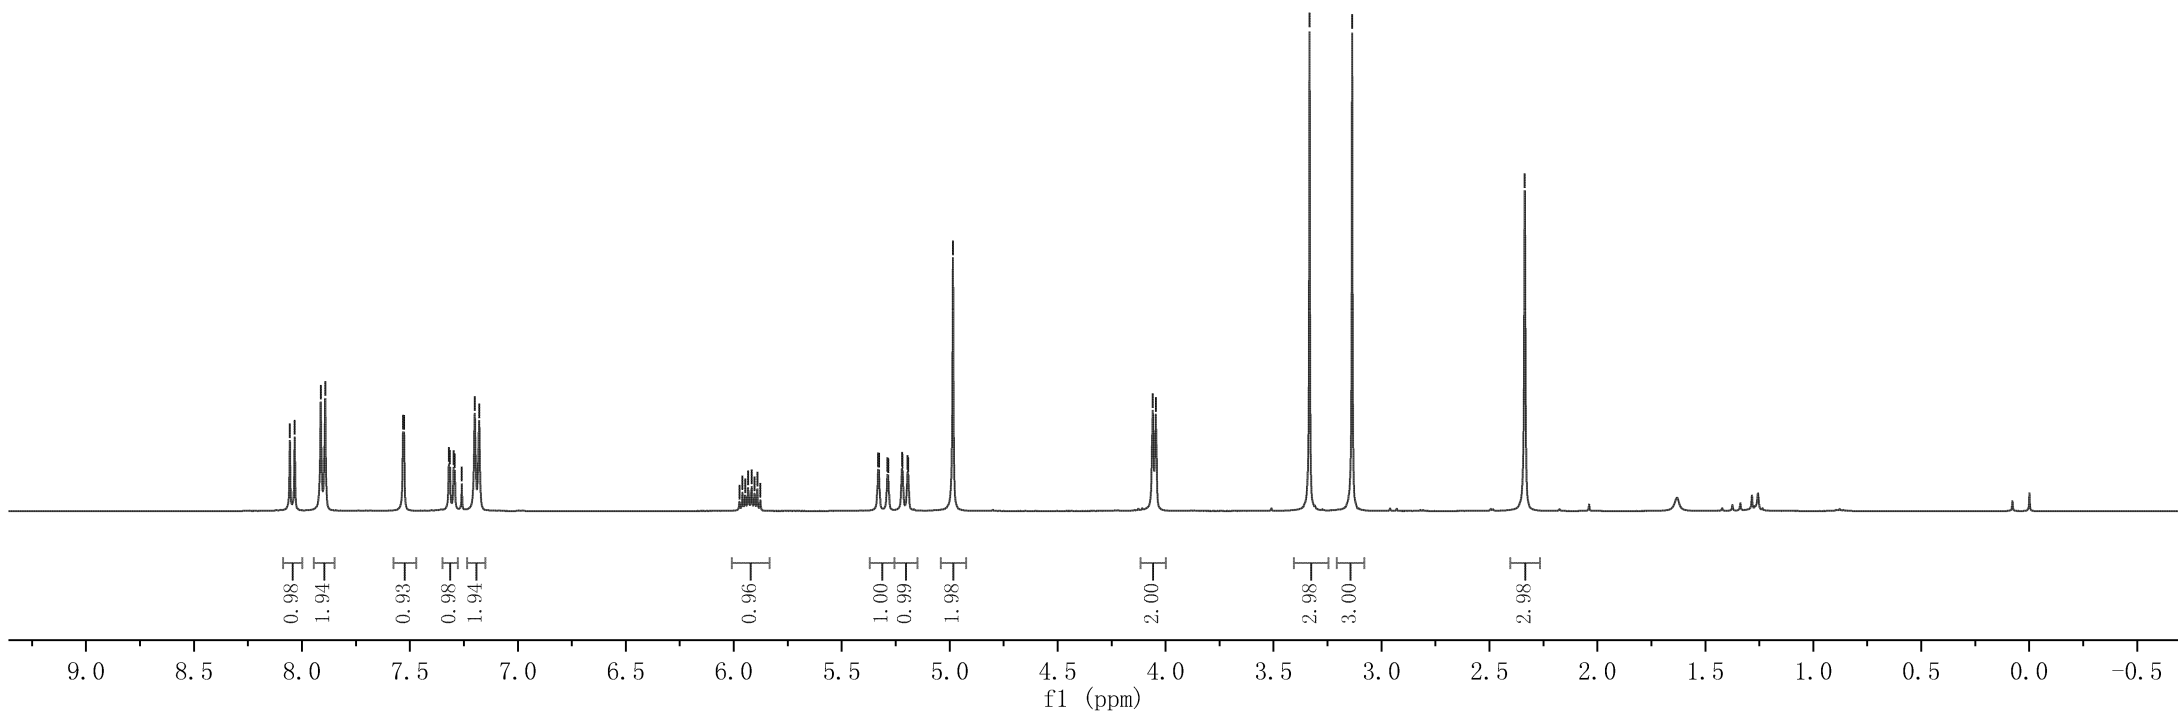

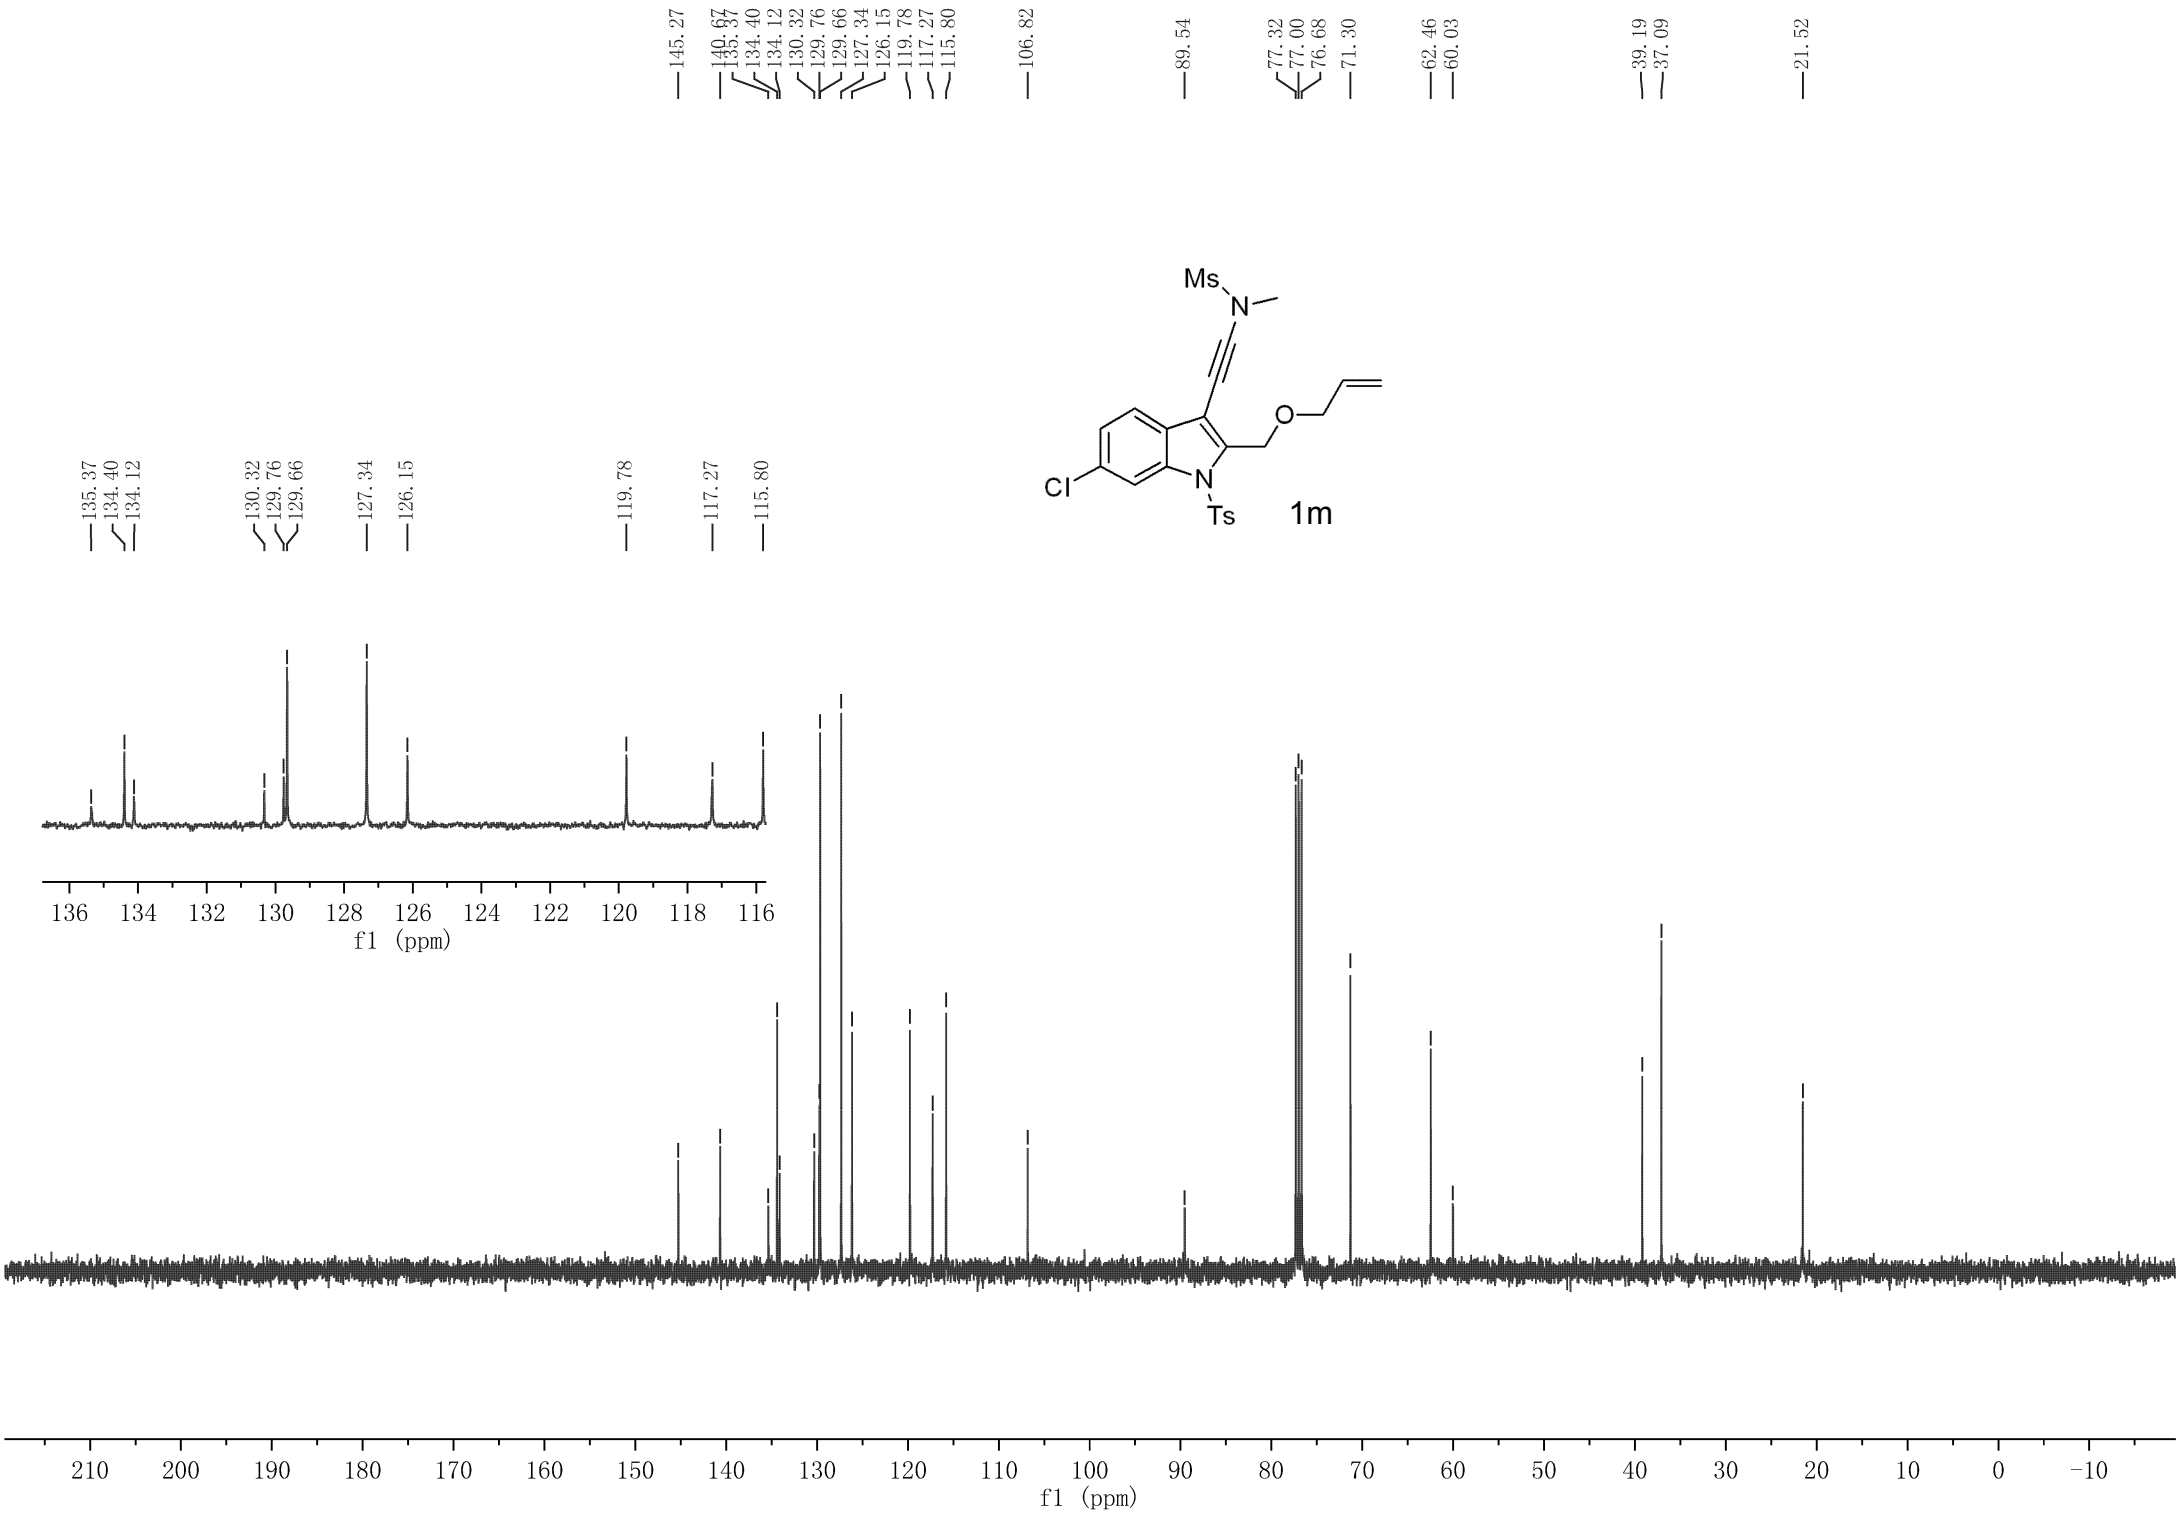

8.303  
7.924  
7.904  
7.443  
7.422  
7.398  
7.377  
7.260  
7.224  
7.204

5.949  
5.935  
5.920  
5.906  
5.892  
5.880  
5.319  
5.276  
5.213  
5.187  
4.969

4.042  
4.031

3.325  
3.127

2.352

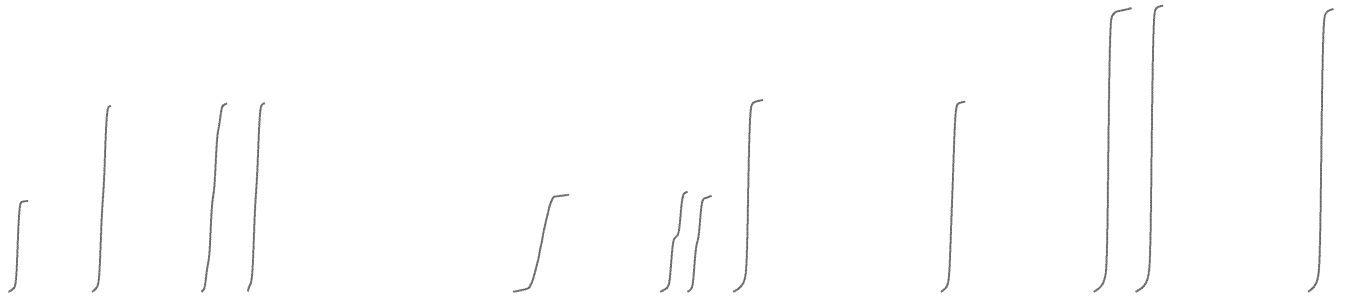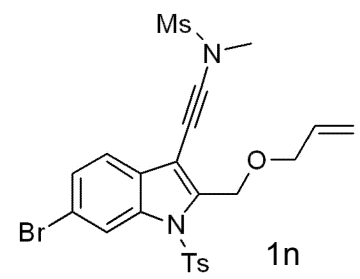

0.96  
1.97  
2.00  
2.00

1.03

1.06  
1.02  
2.03

2.02

3.01  
3.04

3.00

9.0 8.5 8.0 7.5 7.0 6.5 6.0 5.5 5.0 4.5 4.0 3.5 3.0 2.5 2.0 1.5 1.0 0.5 0.0

f1 (ppm)

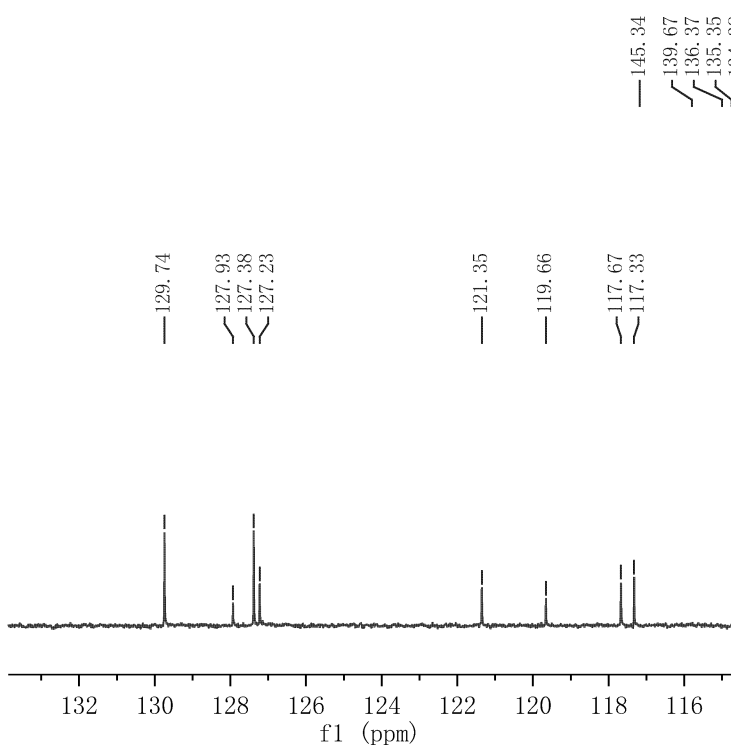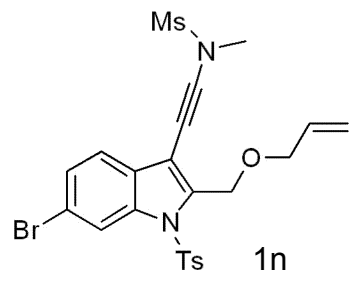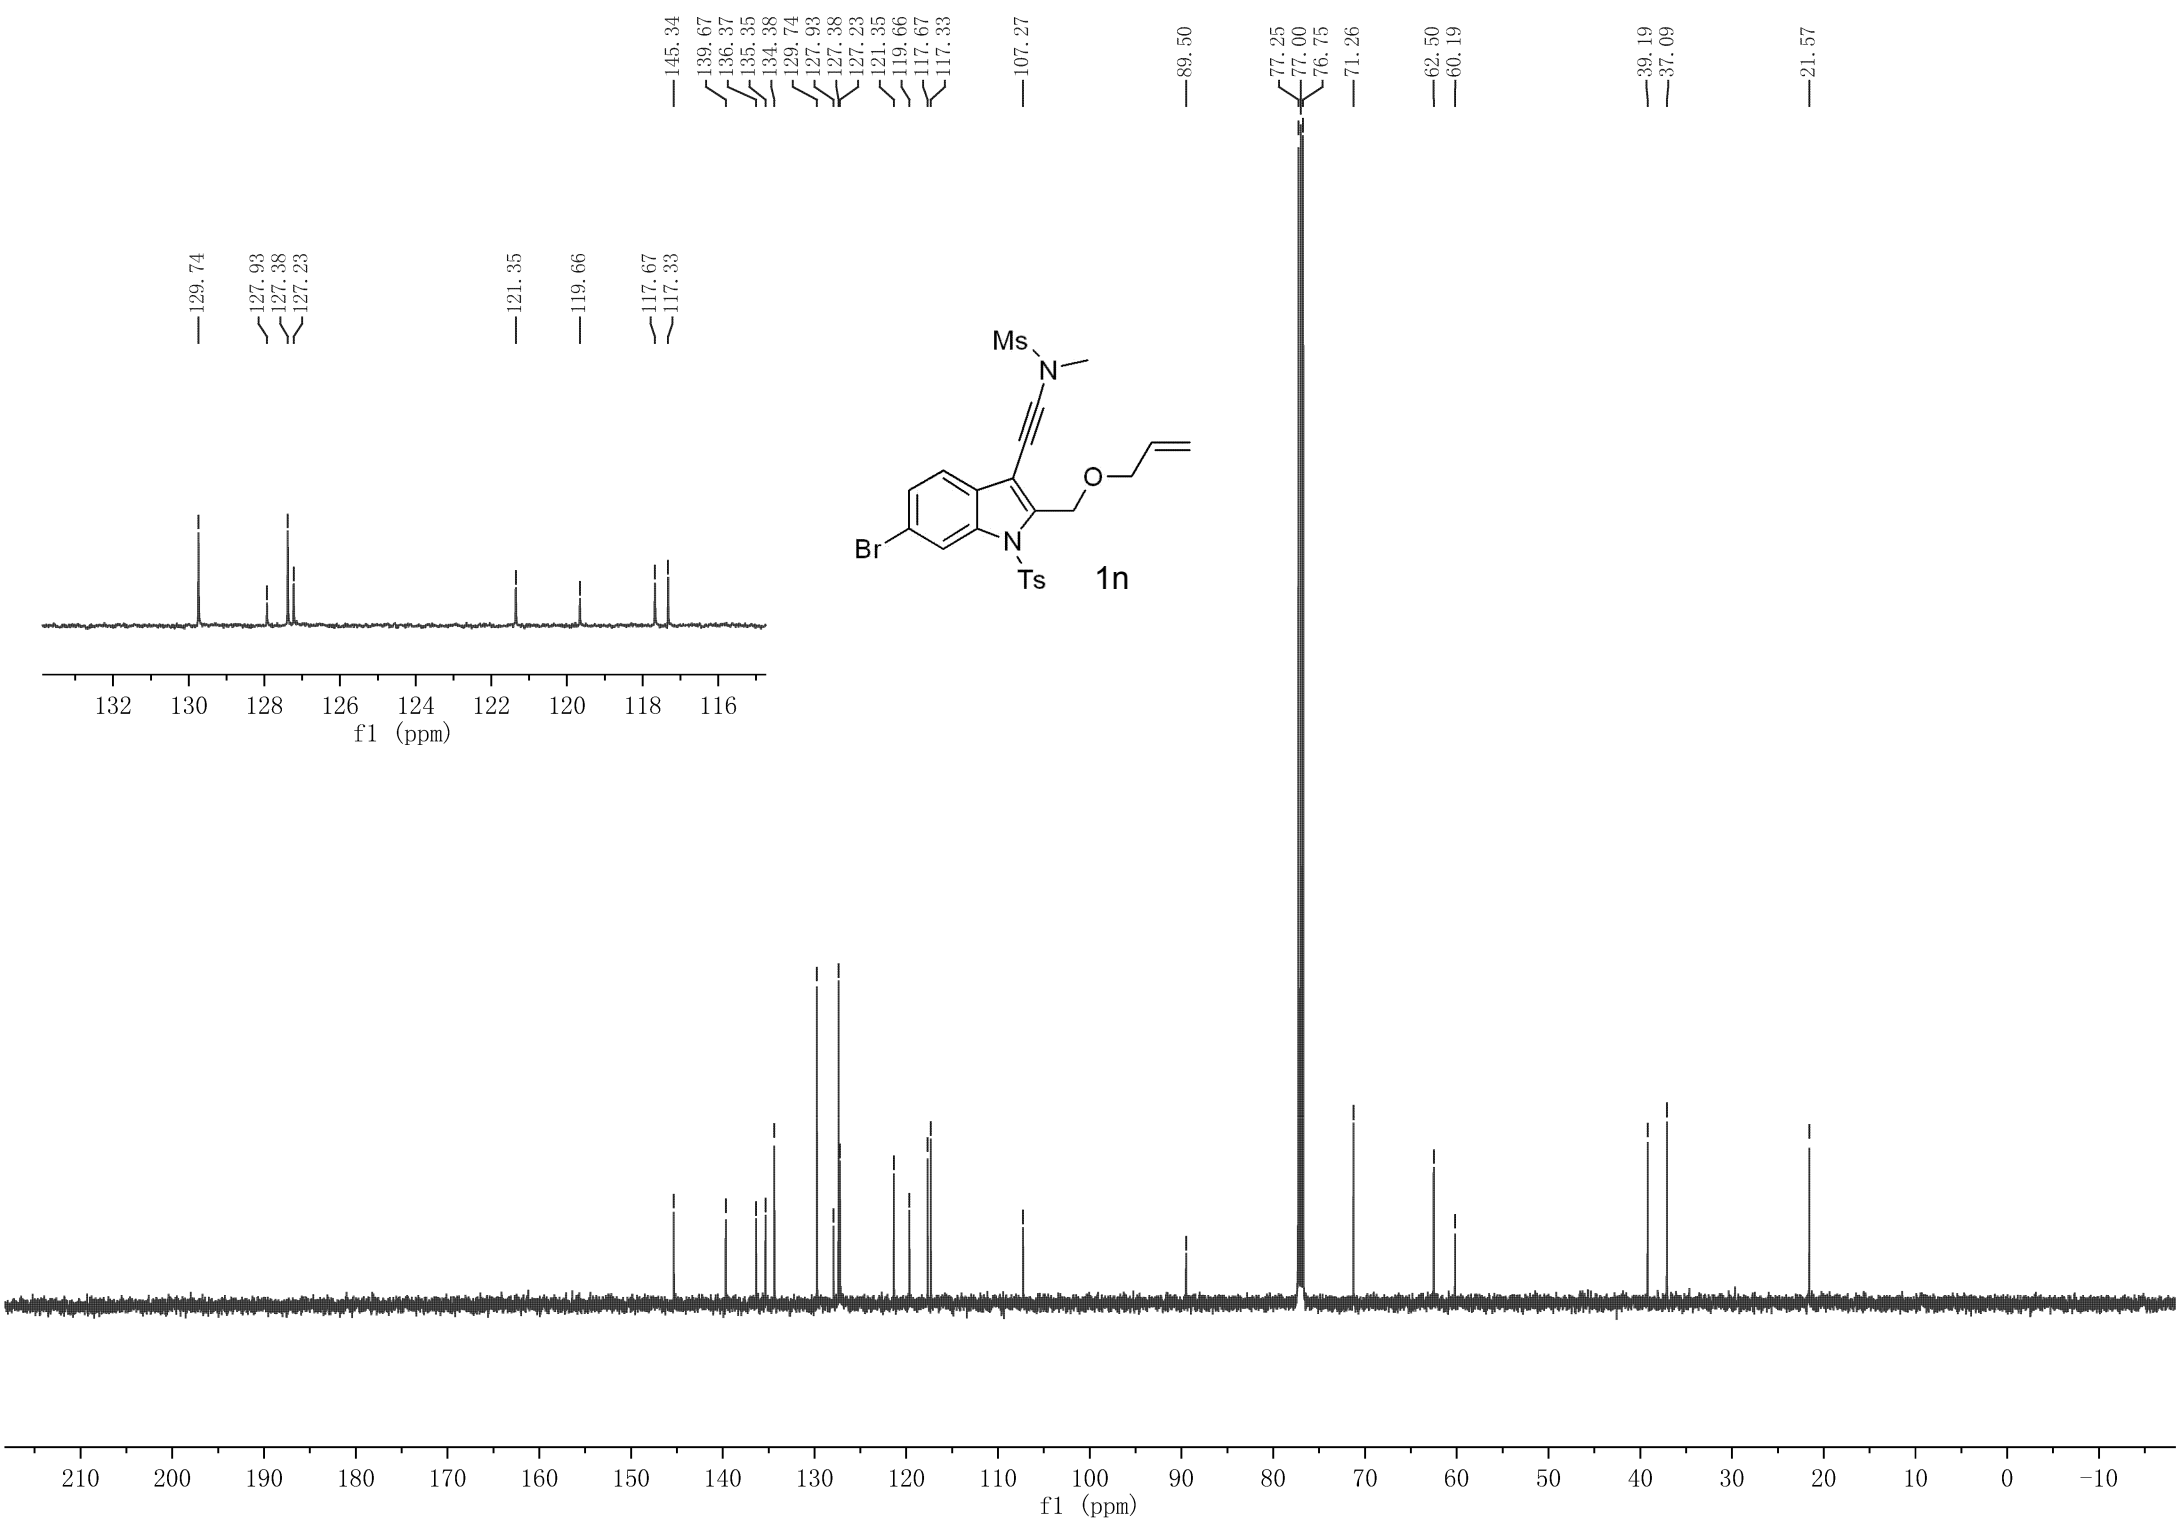

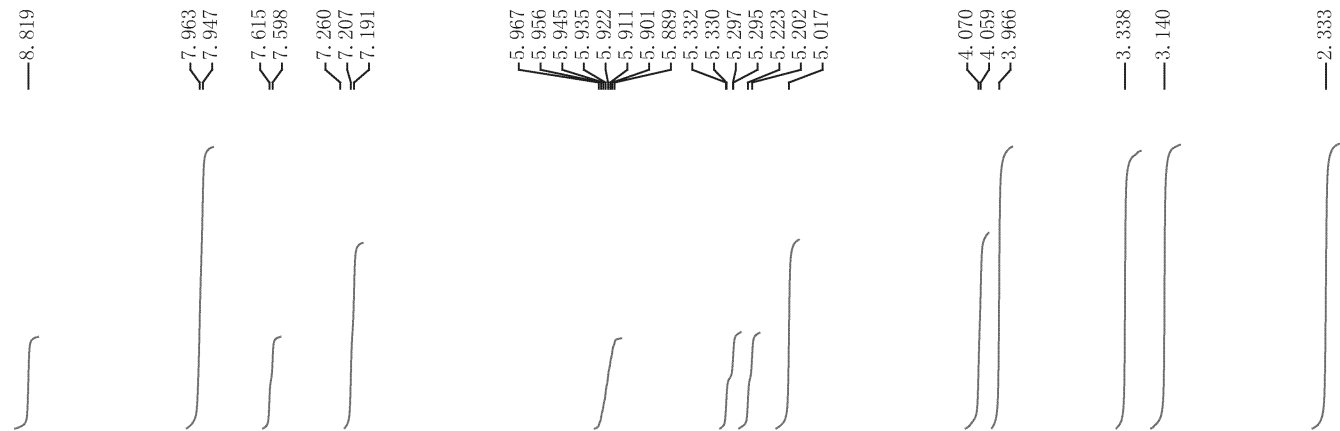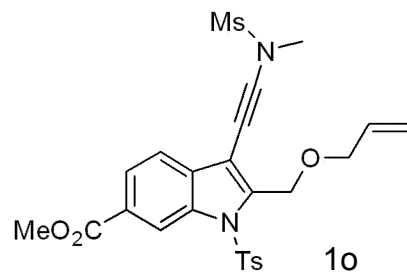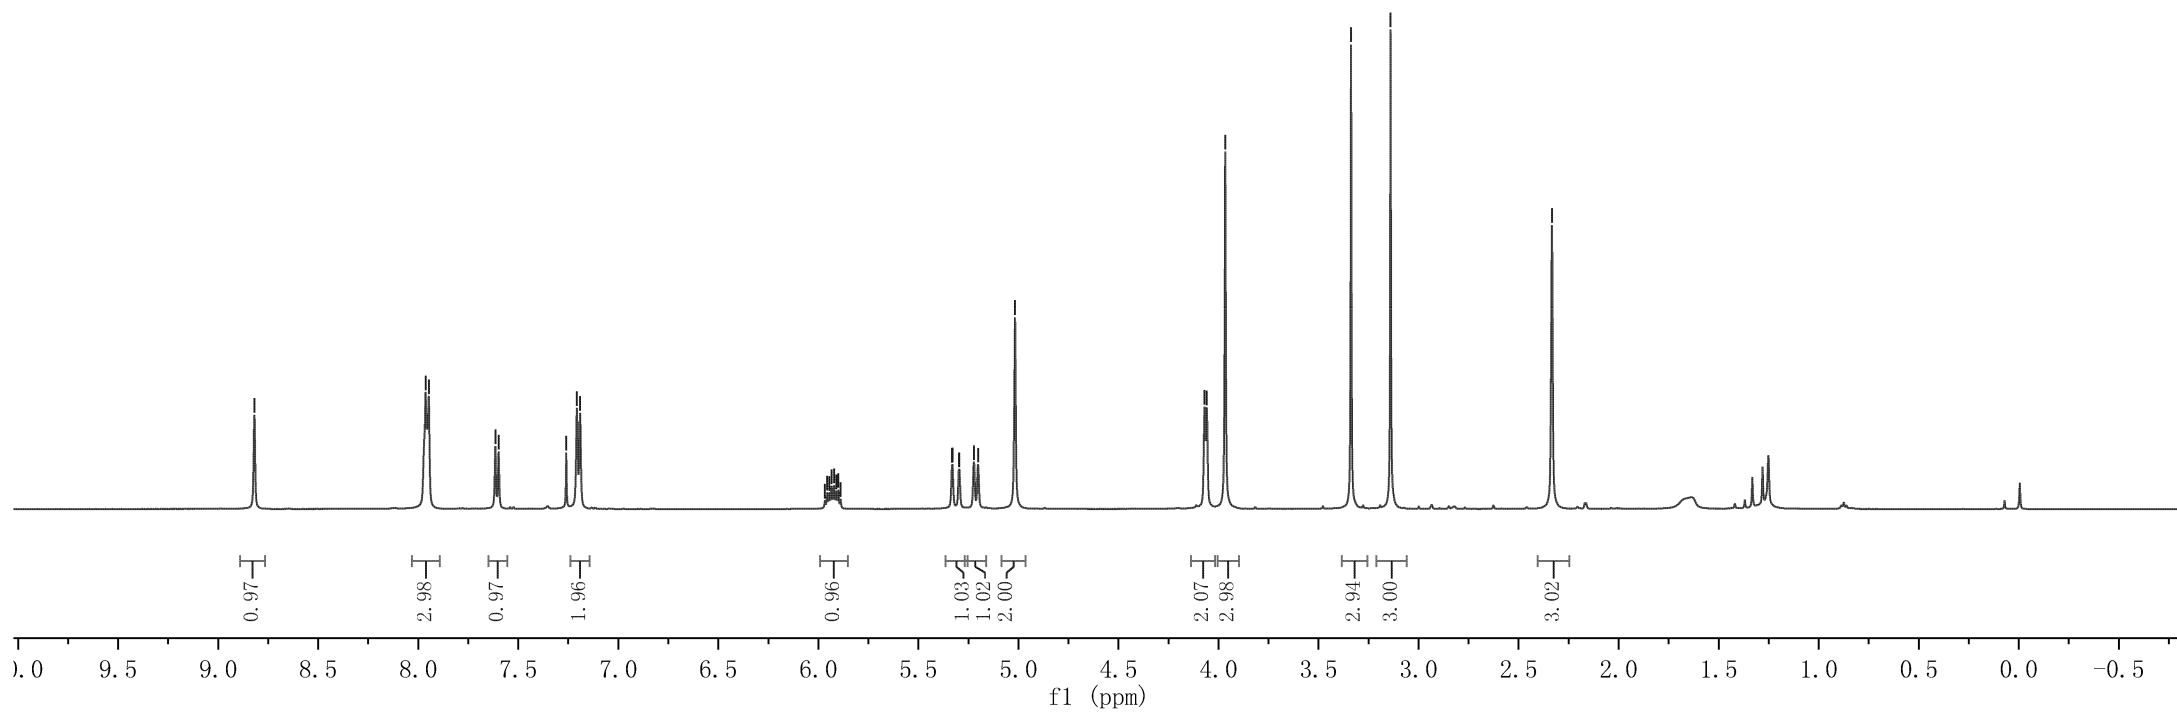

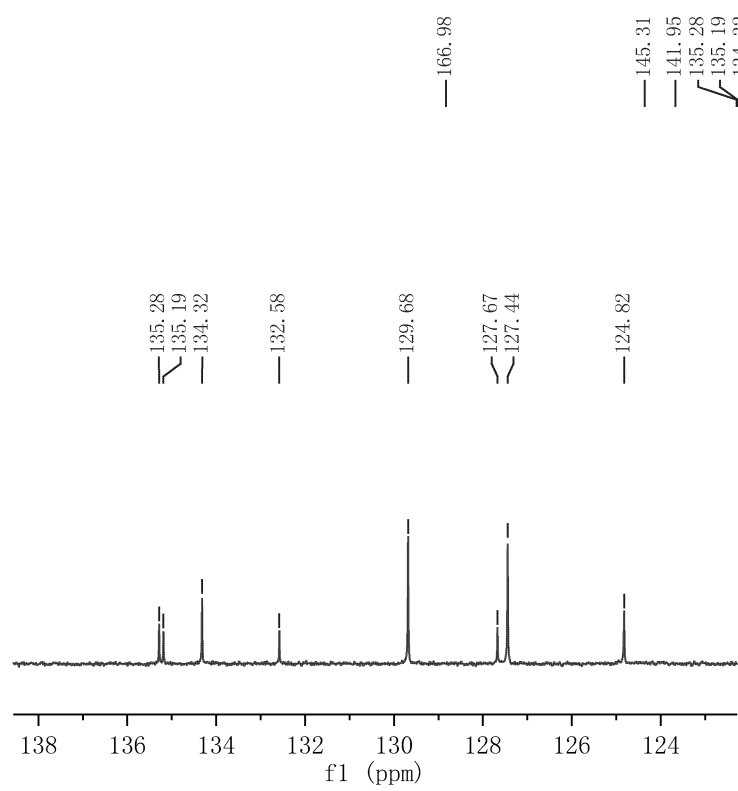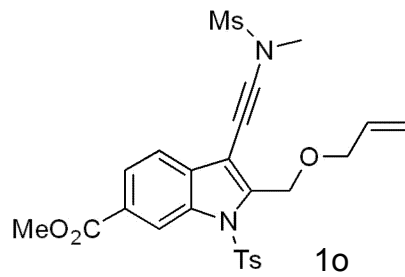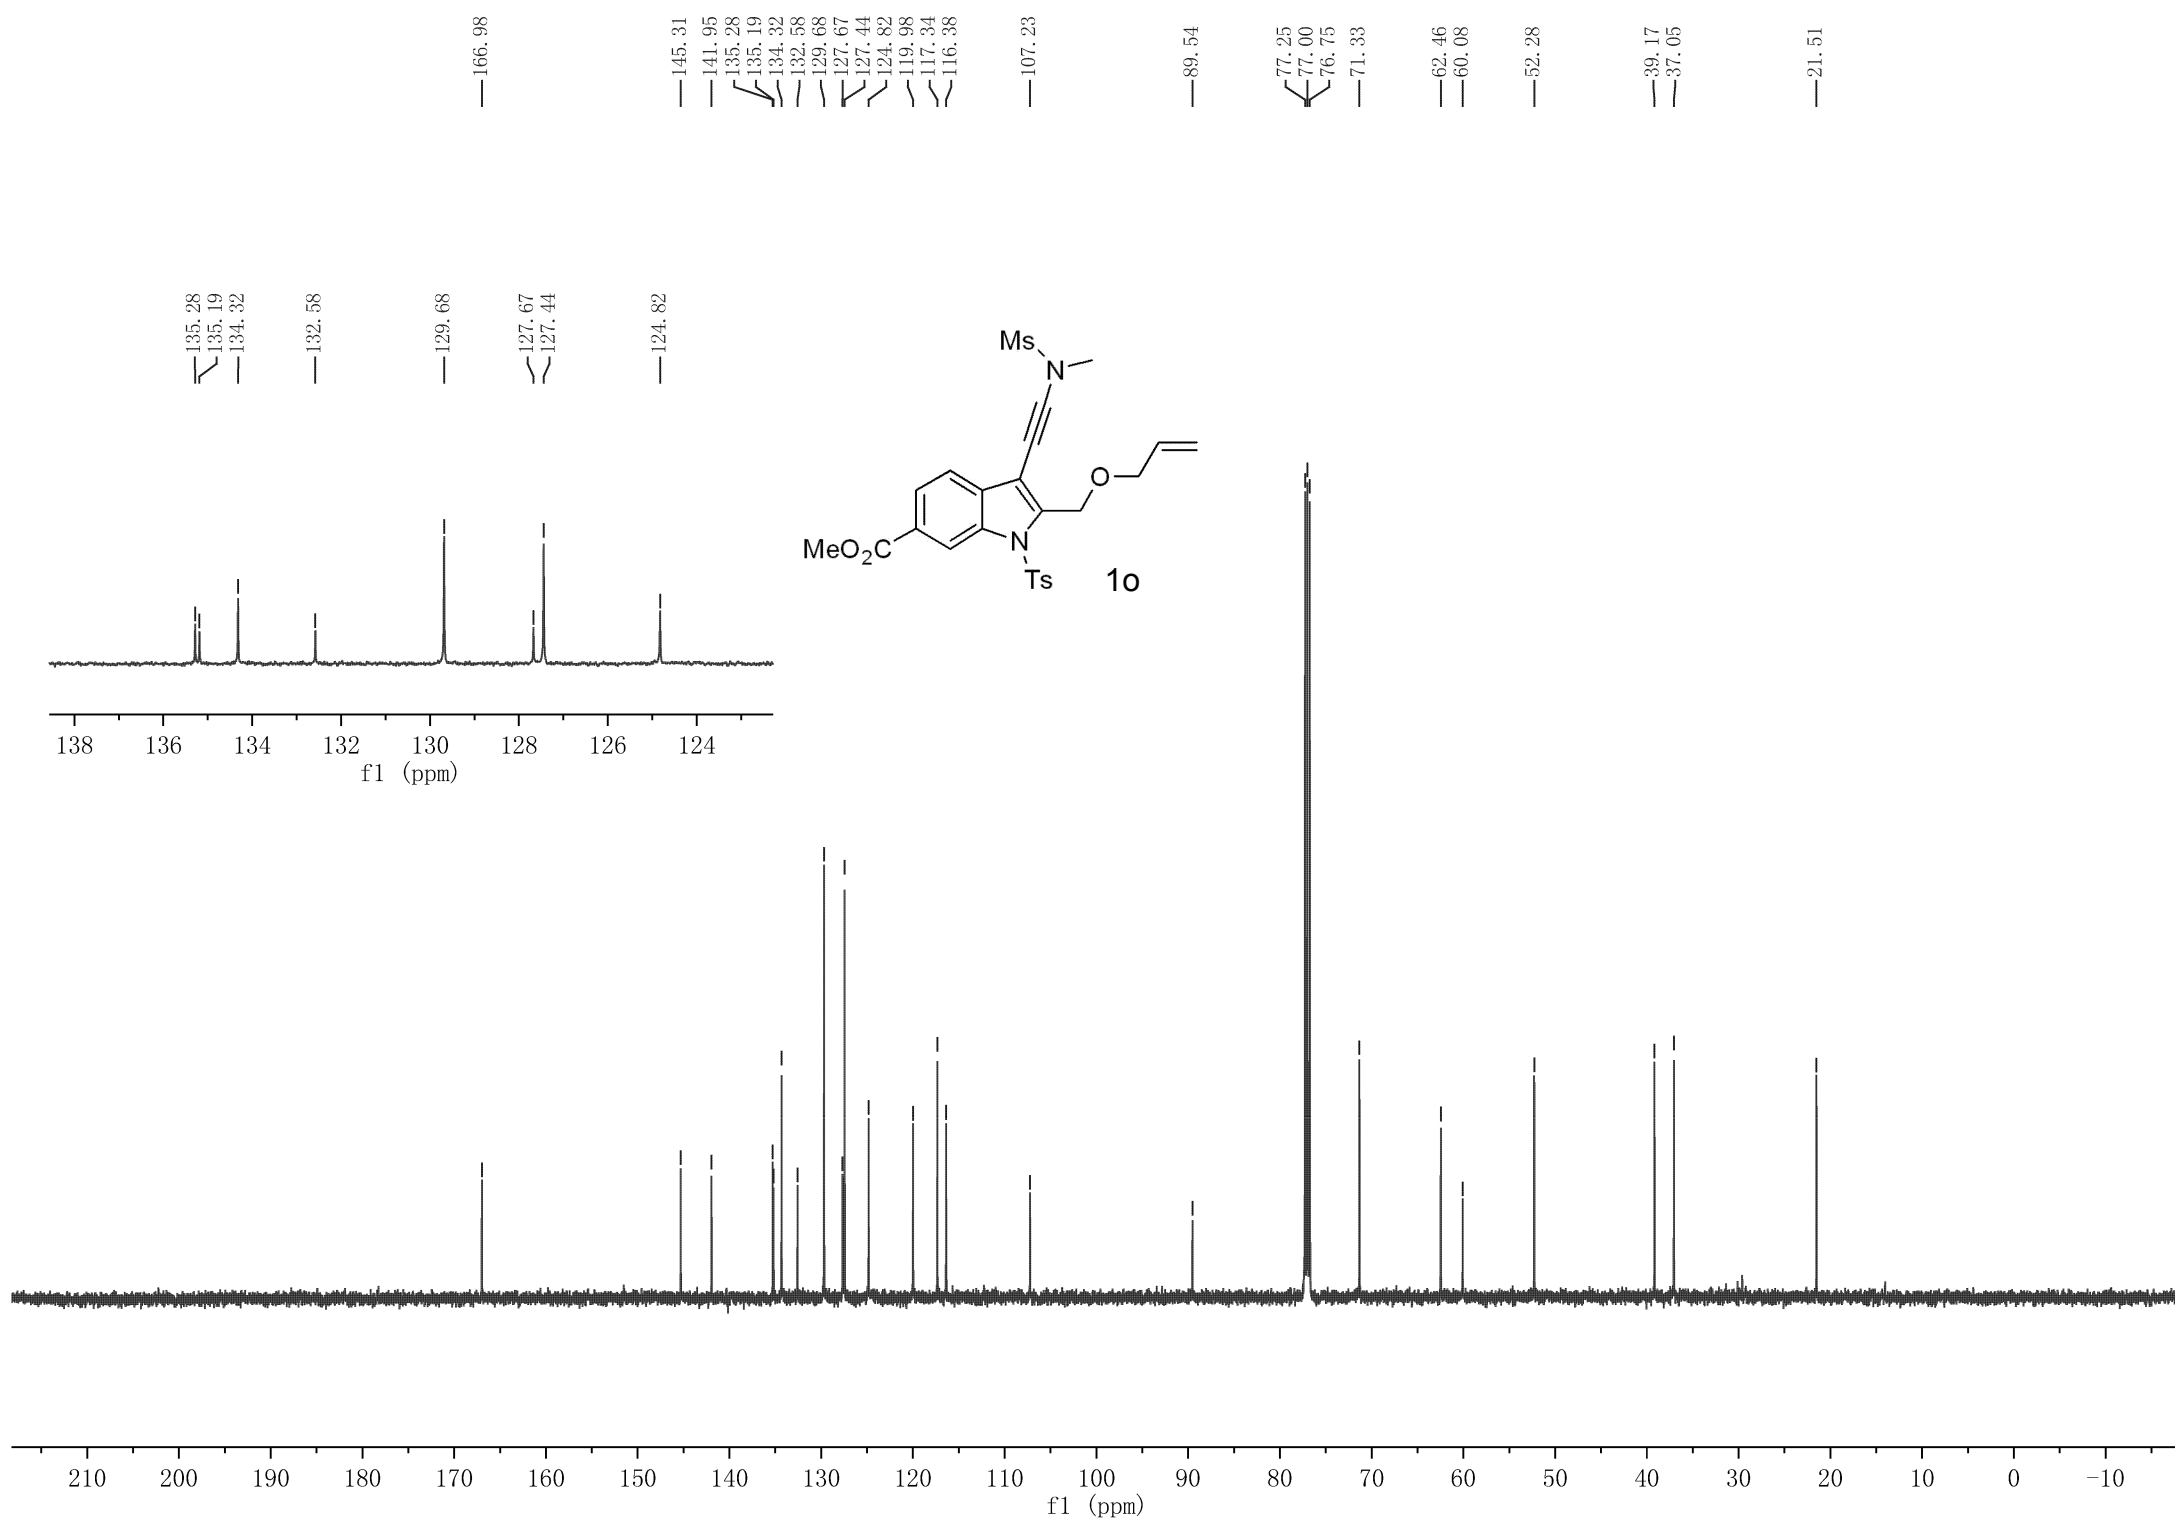

7.690  
7.669  
7.401  
7.383  
7.260  
7.207  
7.188  
7.176  
7.170  
7.156  
7.120  
7.102  
5.956  
5.942  
5.929  
5.916  
5.899  
5.886  
5.873  
5.859  
5.312  
5.308  
5.269  
5.265  
5.185  
5.183  
5.159  
5.157  
5.025

4.065  
4.051

3.320  
3.127

2.509  
2.347

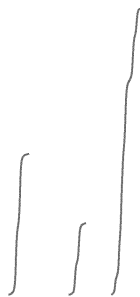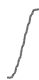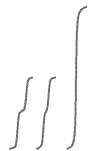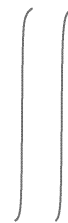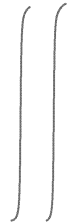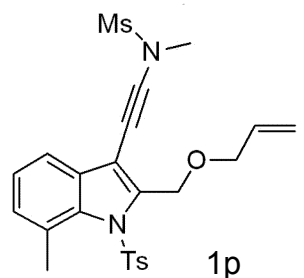

2.00

1.01

4.06

0.97

1.01

1.01

2.01

2.04

3.01

3.00

3.03

3.08

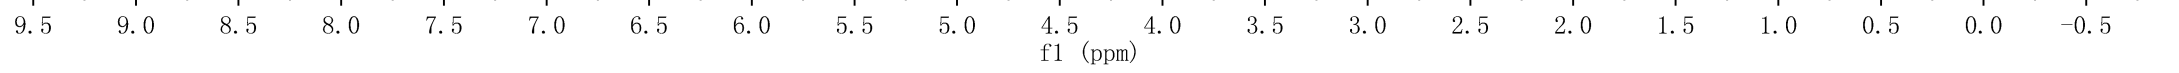

144.36  
142.02  
137.79  
136.14  
134.44  
131.71  
129.98  
129.28  
127.18  
126.56  
124.65  
117.91  
117.01  
110.34

90.00  
77.32  
77.00  
76.68  
71.25  
64.54  
60.72

39.12  
36.85

22.11  
21.41

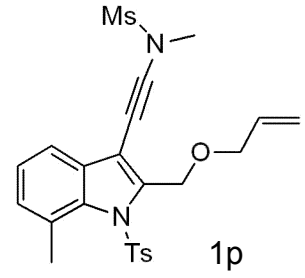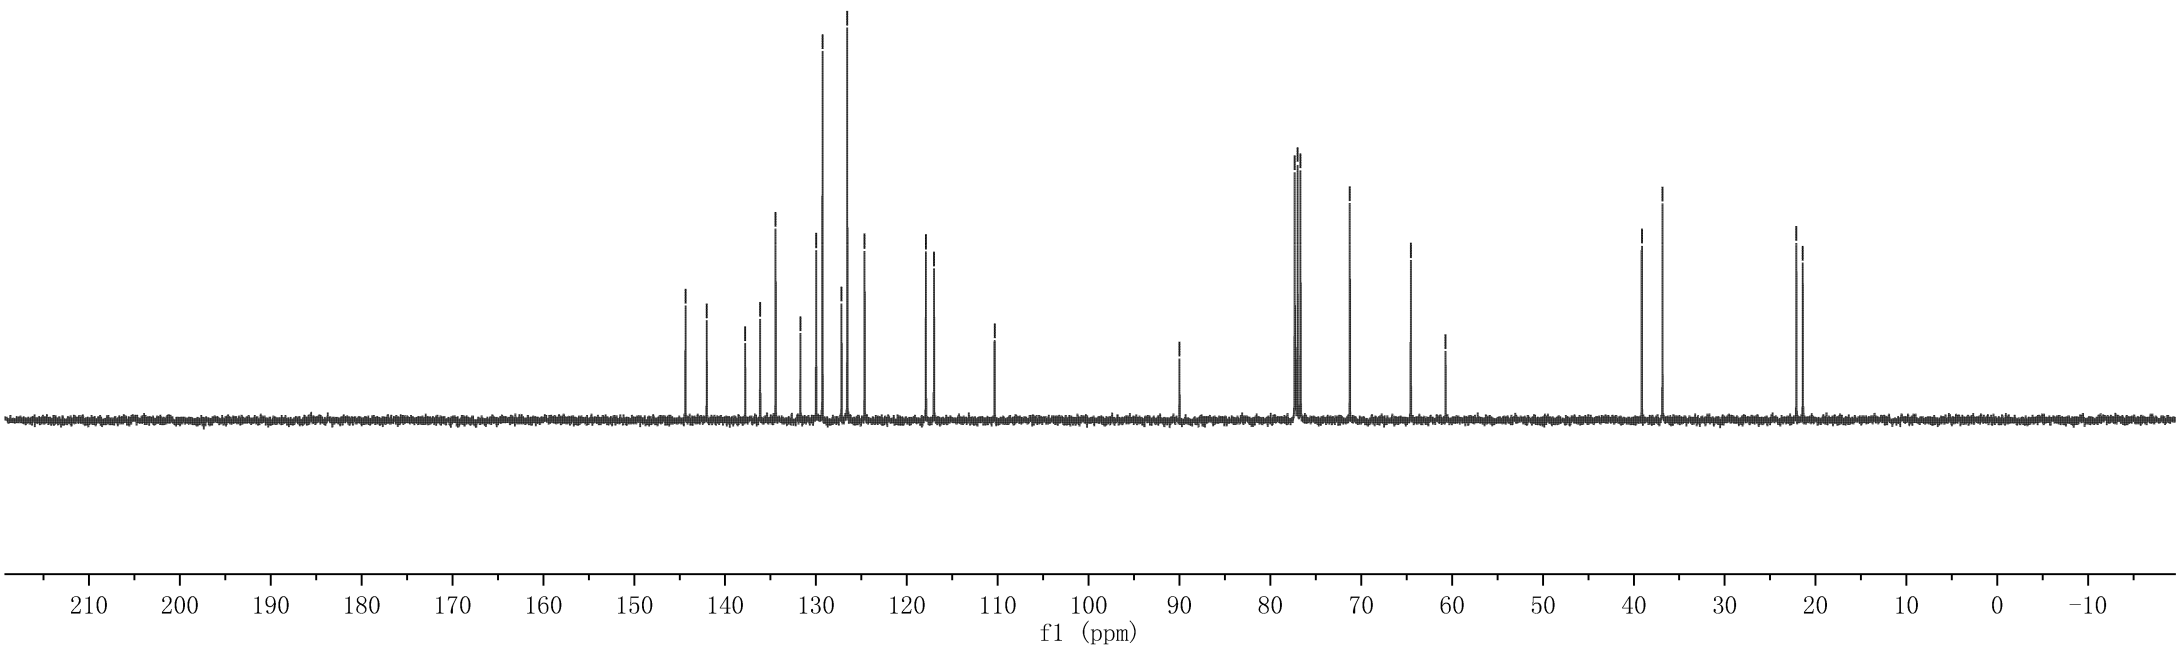



8.101  
8.080  
7.947  
7.925  
7.603  
7.584  
7.532  
7.510  
7.400  
7.382  
7.363  
7.322  
7.304  
7.285  
7.260

5.974  
5.961  
5.948  
5.934  
5.918  
5.904  
5.891  
5.877  
5.328  
5.324  
5.284  
5.281  
5.234  
5.208  
4.996

4.056  
4.042

3.341  
3.140

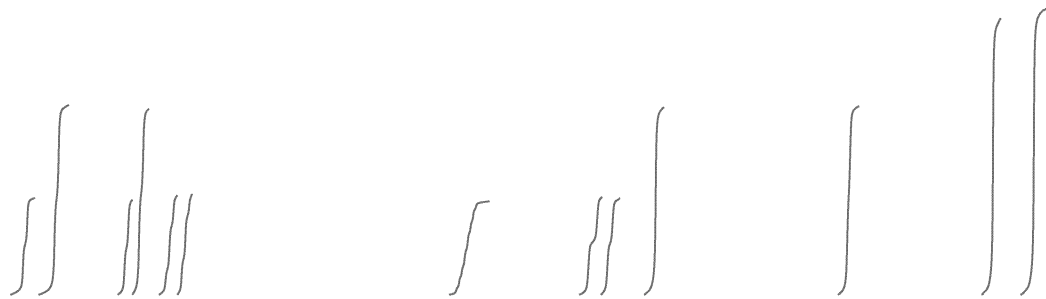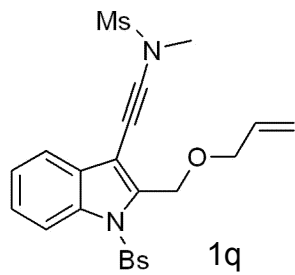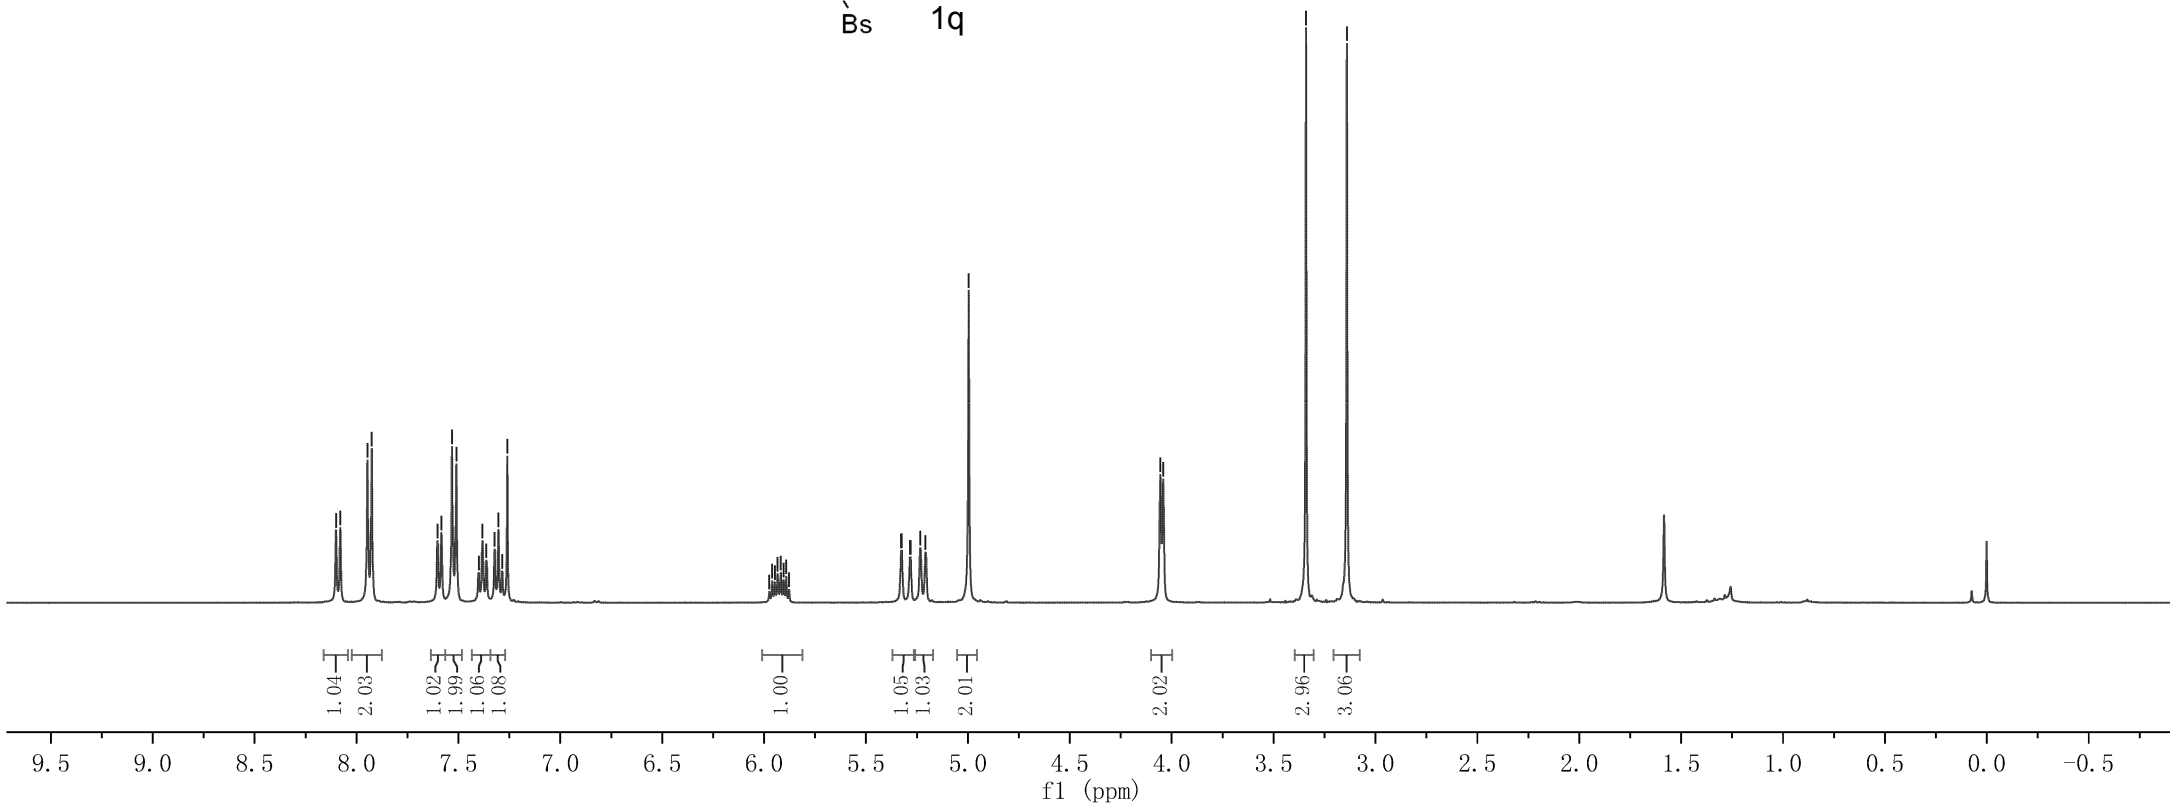

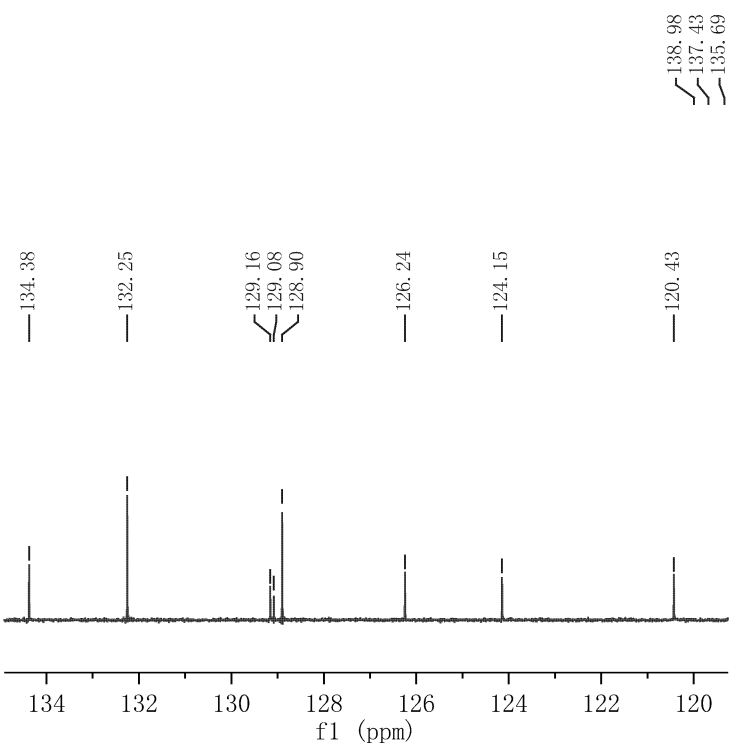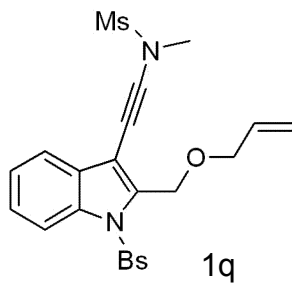

- 138.98
- 137.43
- 135.69
- 134.38
- 132.25
- 129.16
- 129.08
- 128.90
- 126.24
- 124.15
- 120.43
- 117.33
- 114.50
- 108.15

89.54

- 77.25
- 77.00
- 76.75
- 71.21

- 62.54
- 60.52

- 39.22
- 37.04

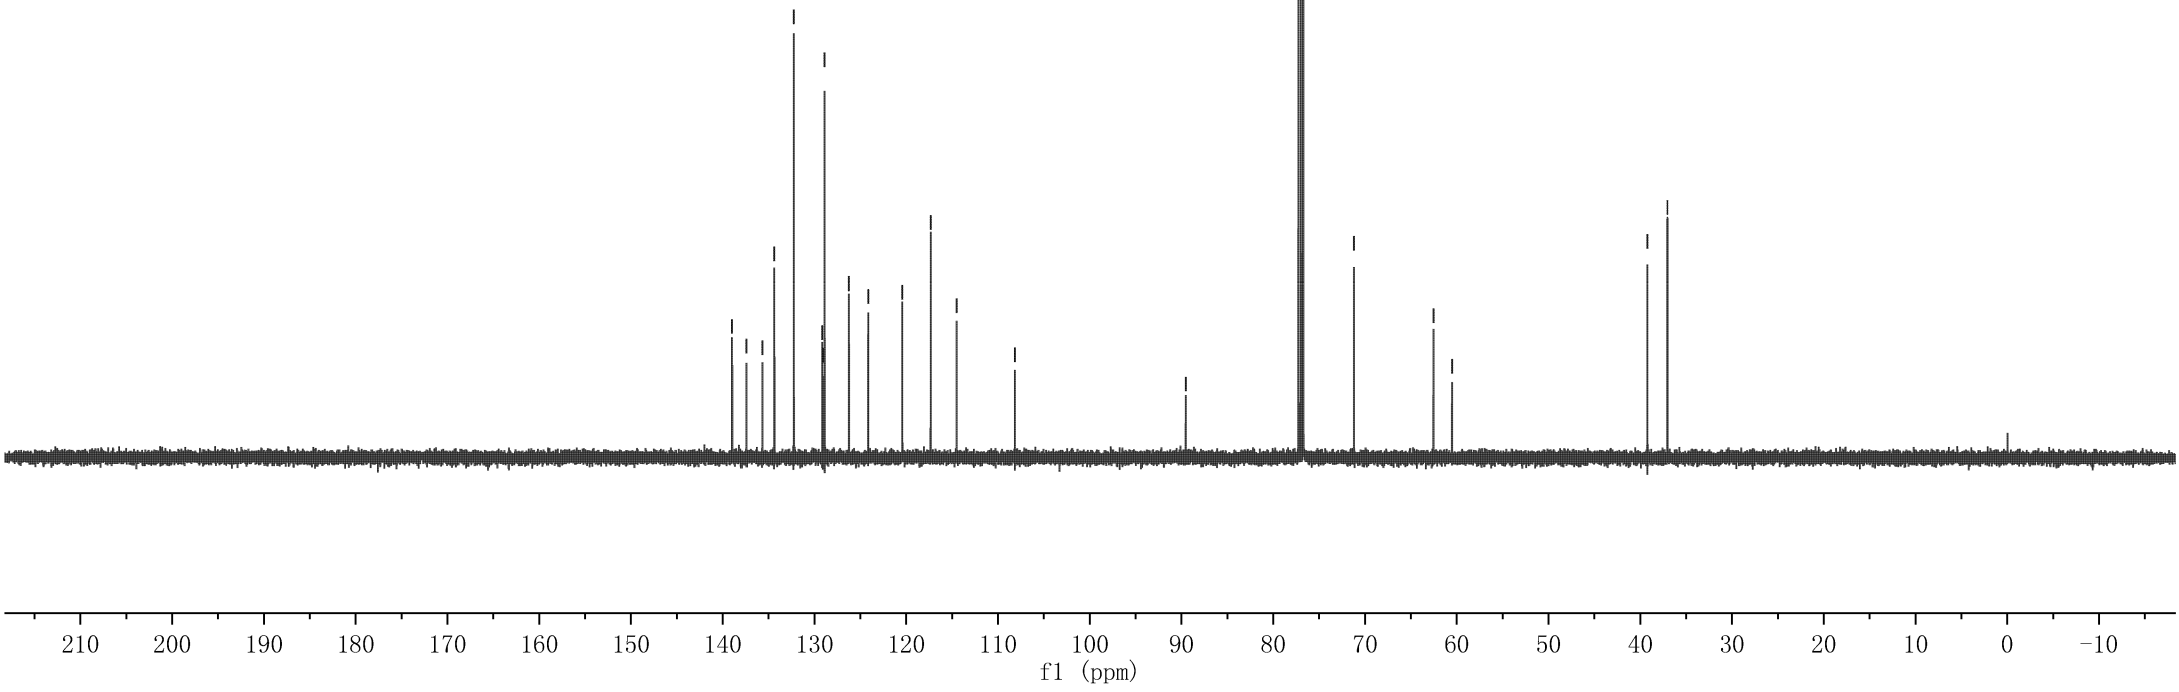

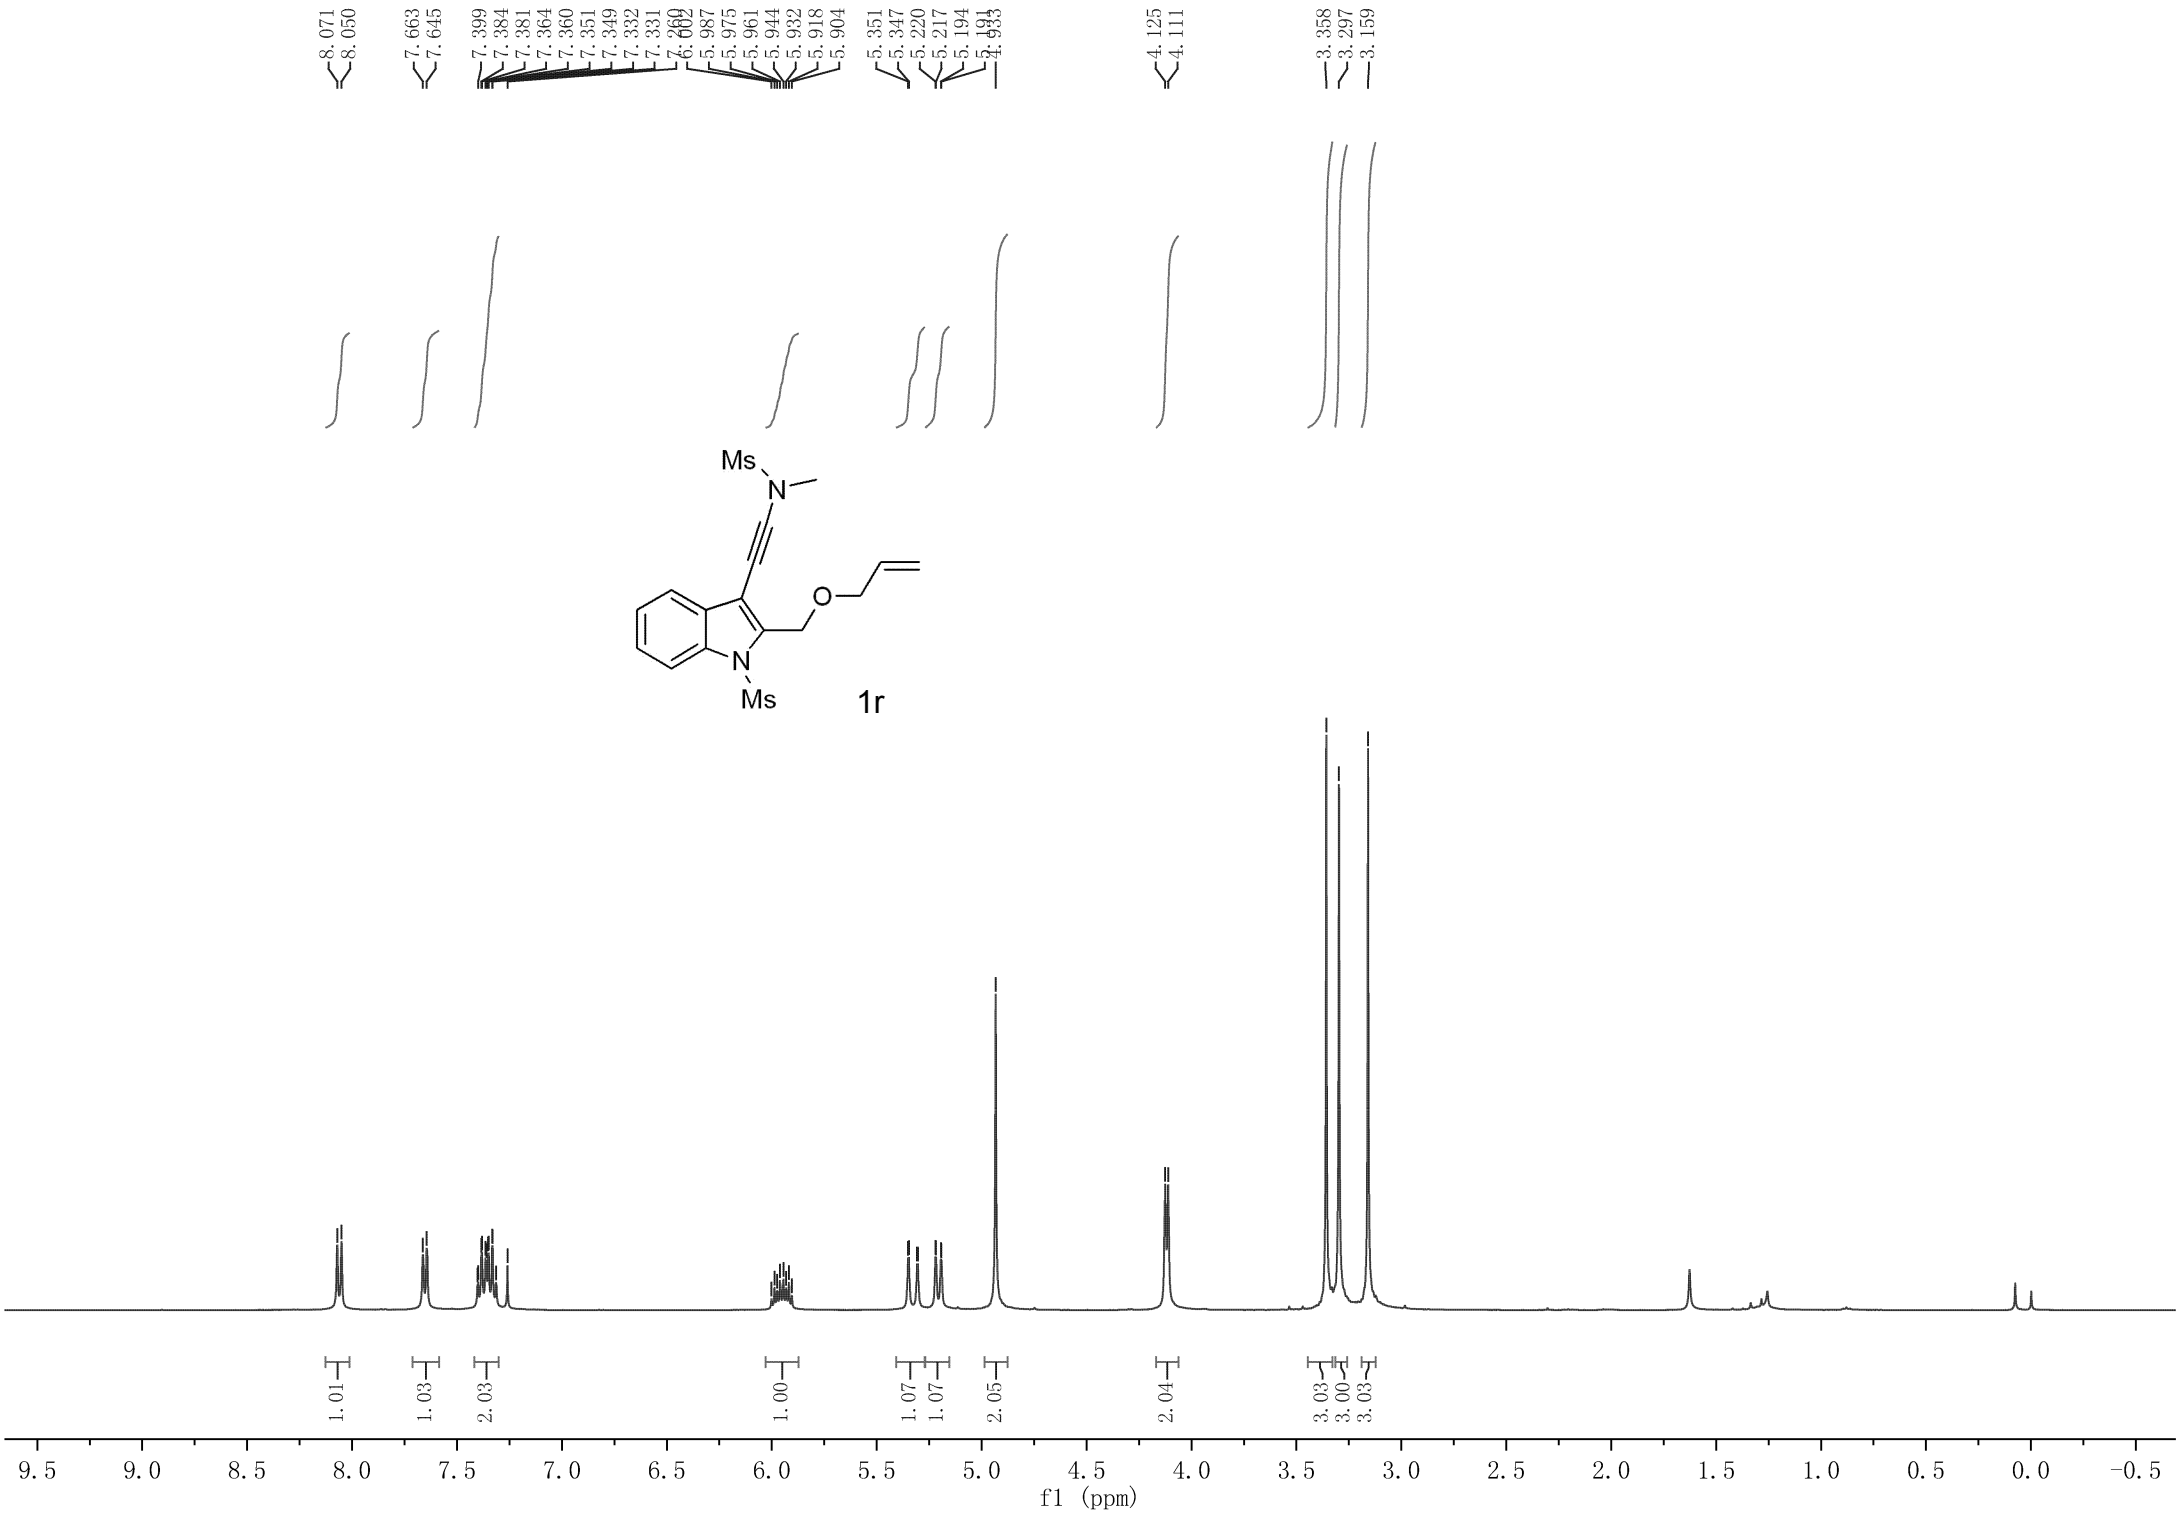

138.79  
135.95  
134.18  
128.75  
126.12  
123.93  
120.36  
117.59  
114.08  
106.63

89.16

77.32  
77.00  
76.68  
71.48

62.65  
60.35

41.62  
39.23  
36.97

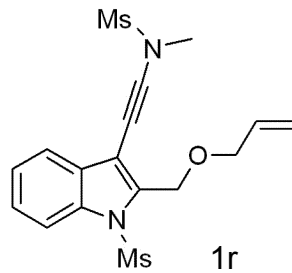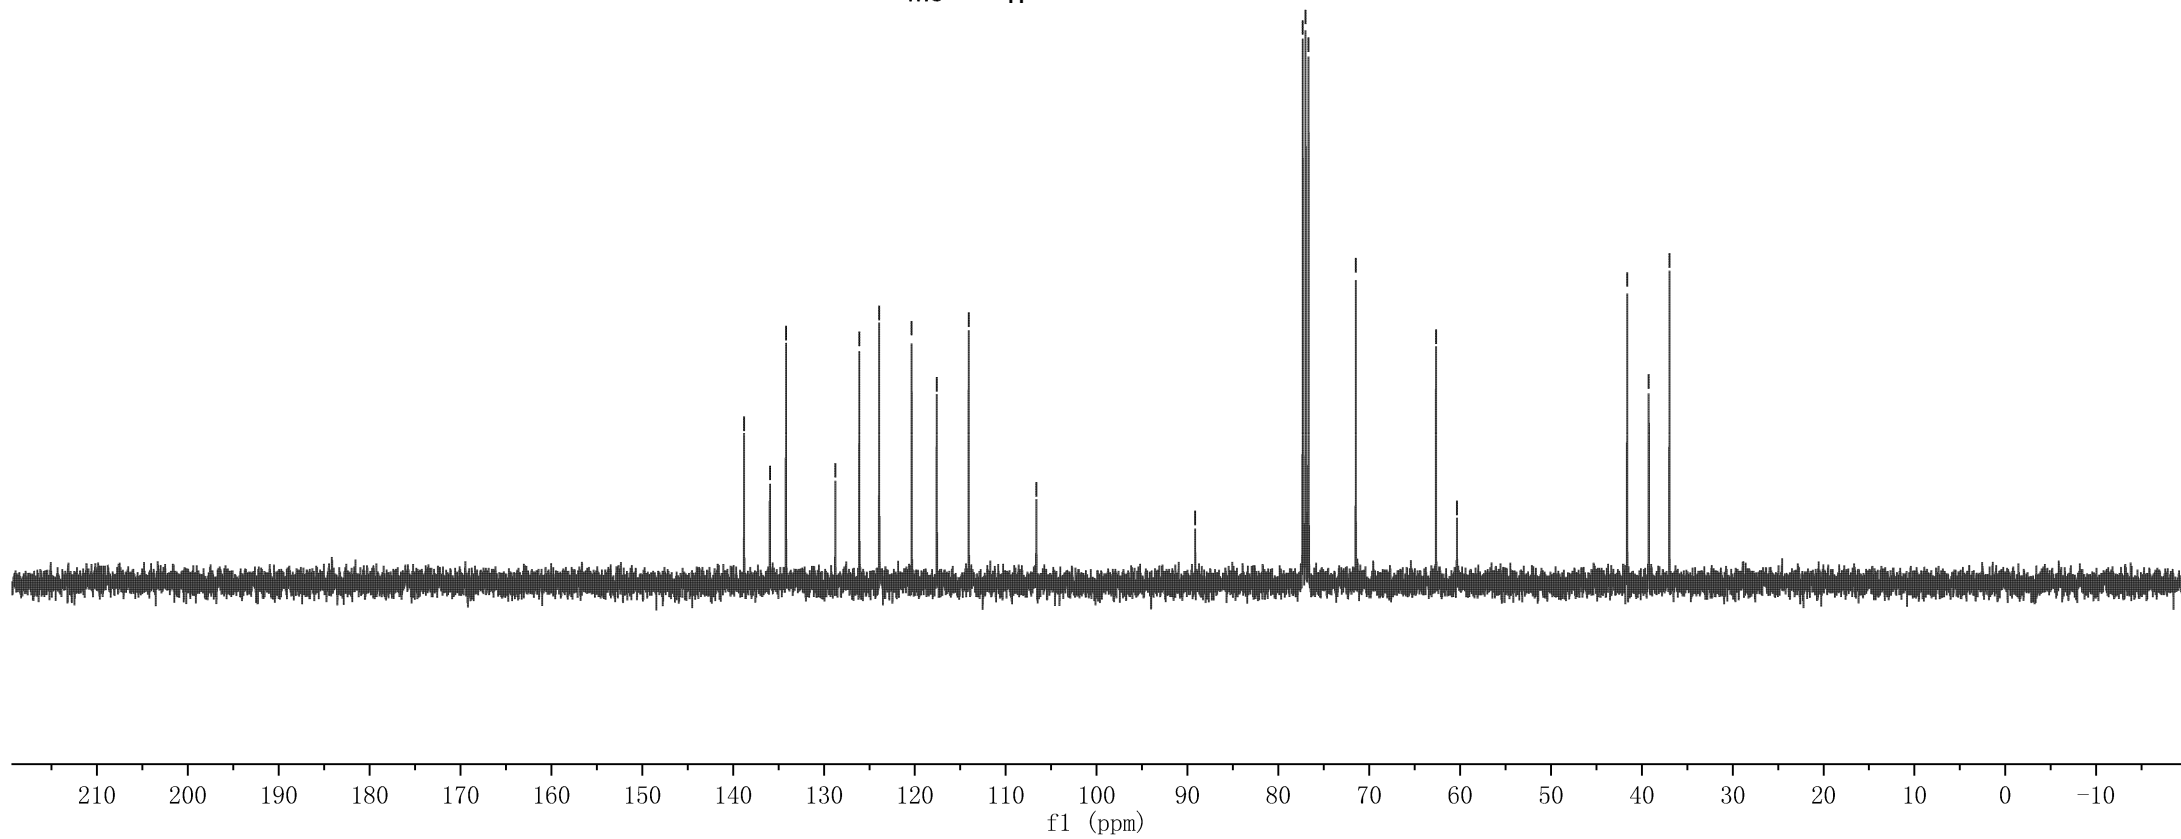

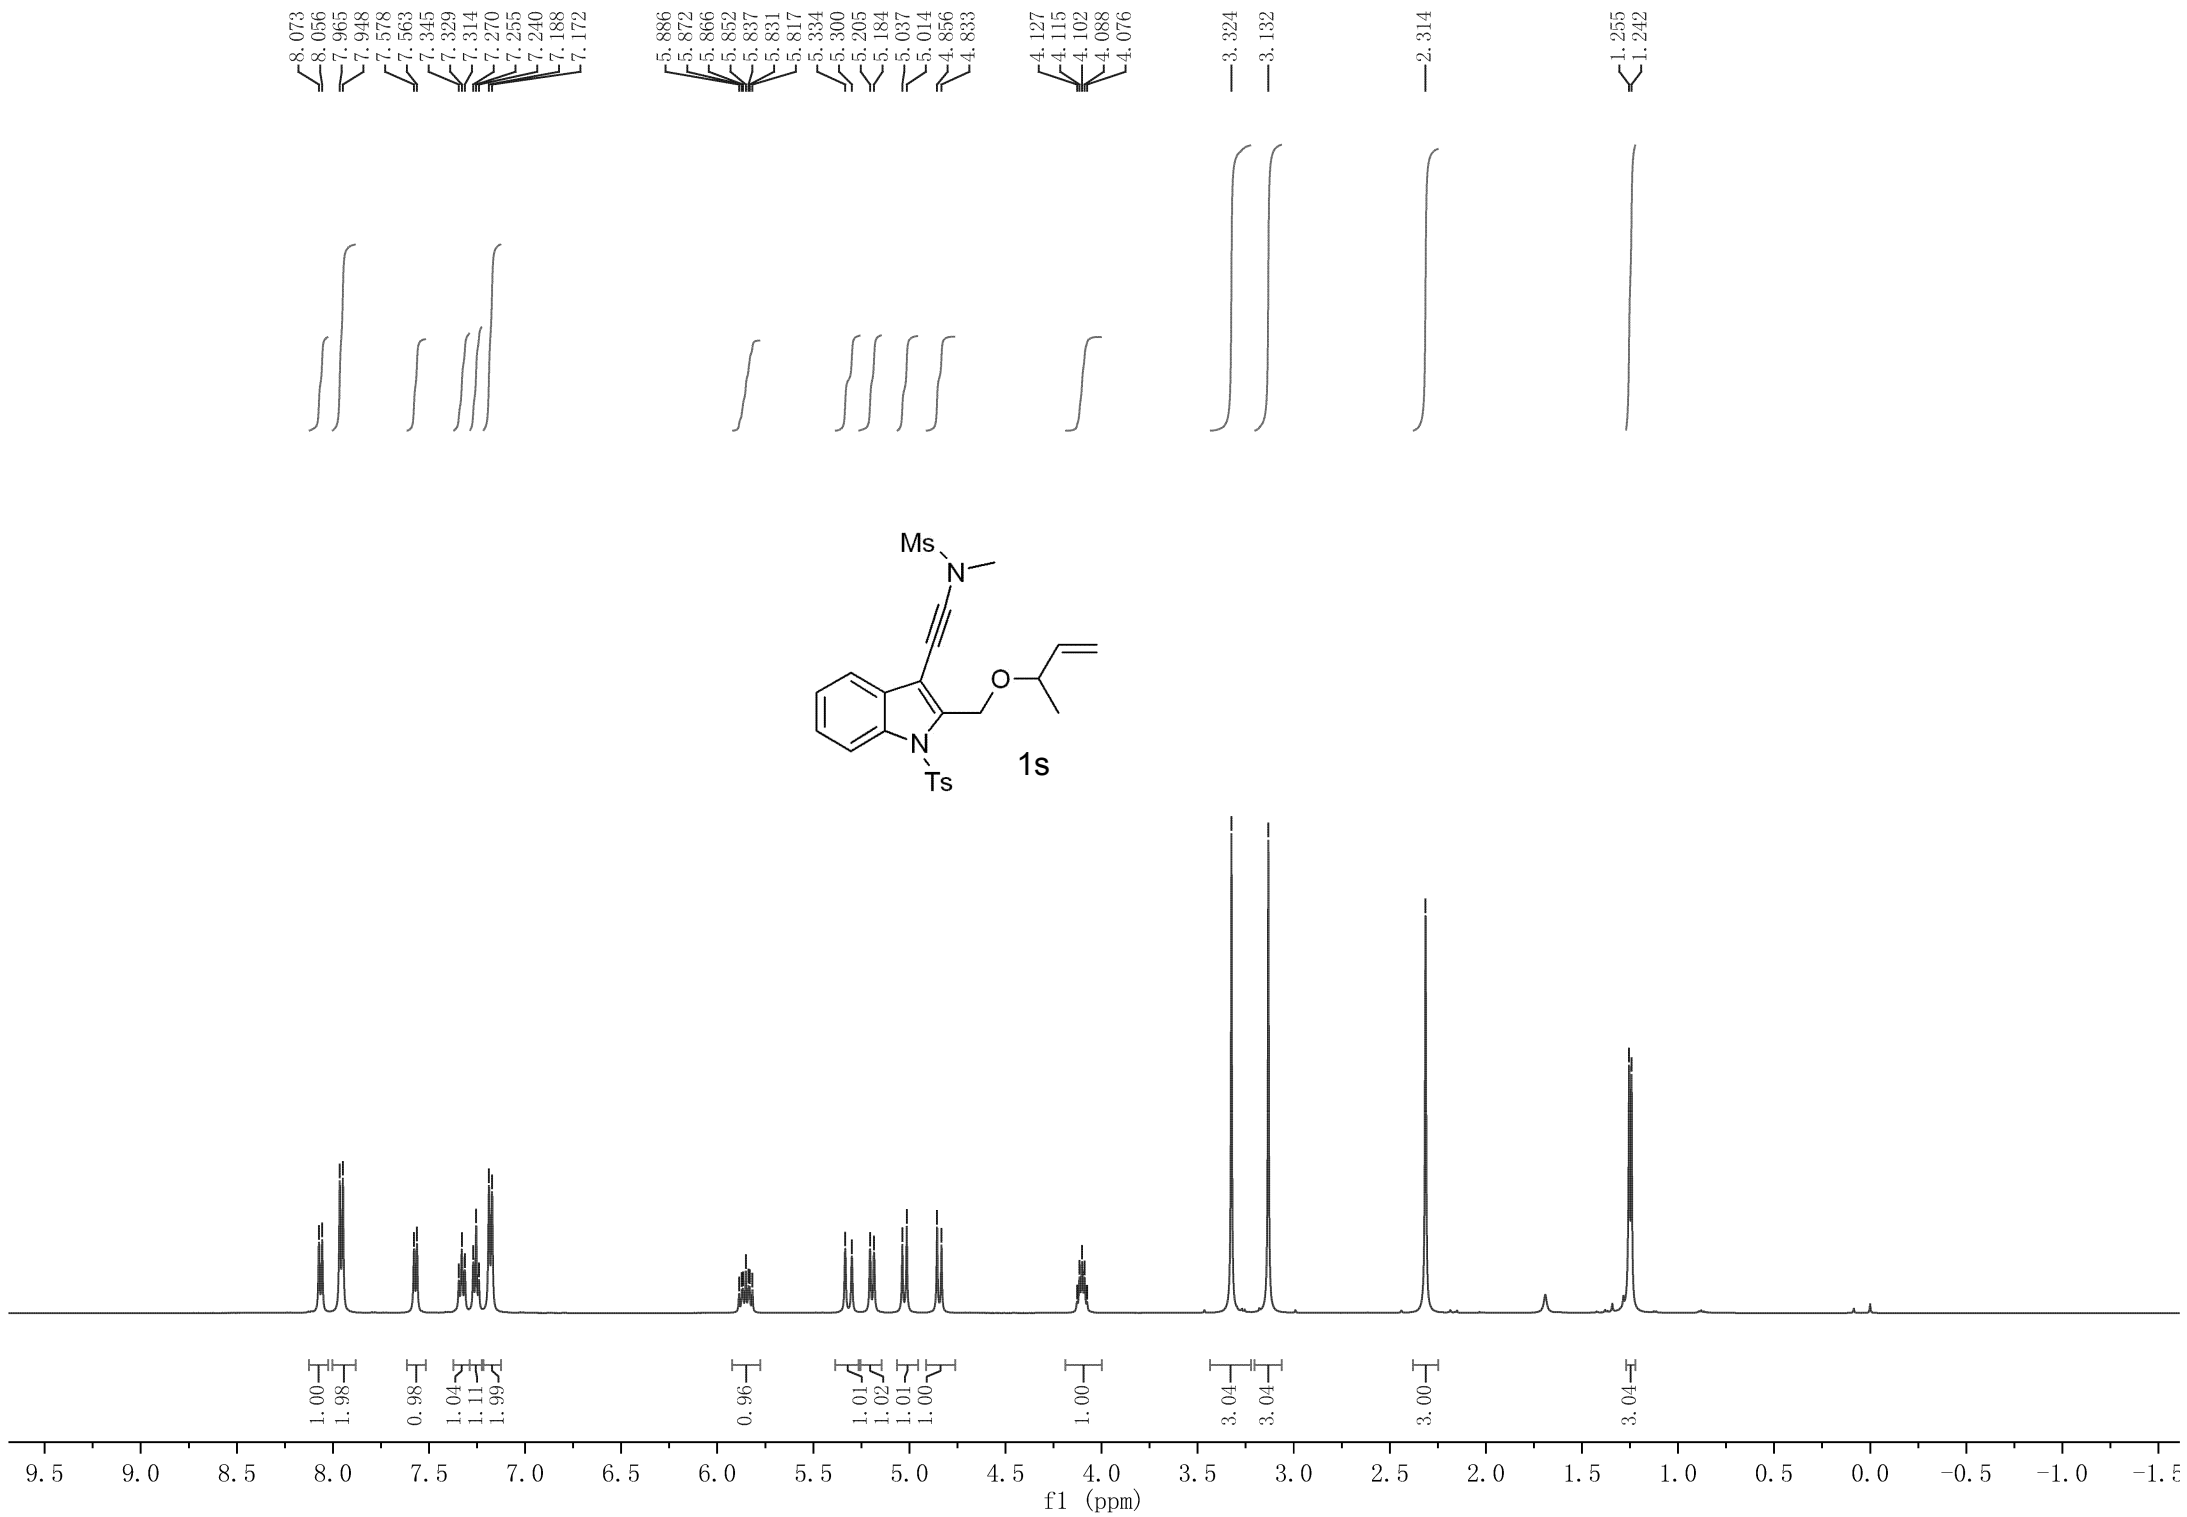

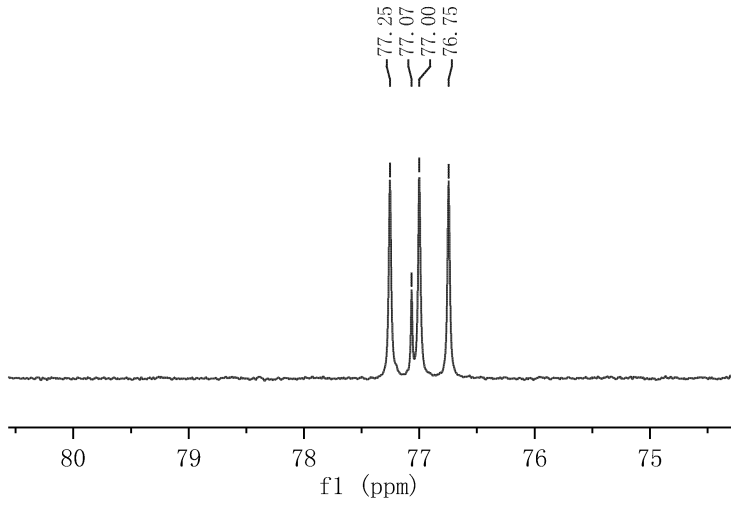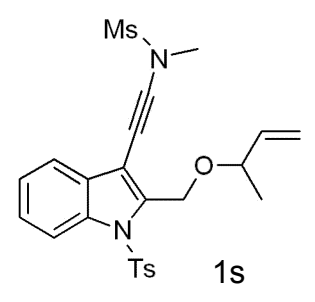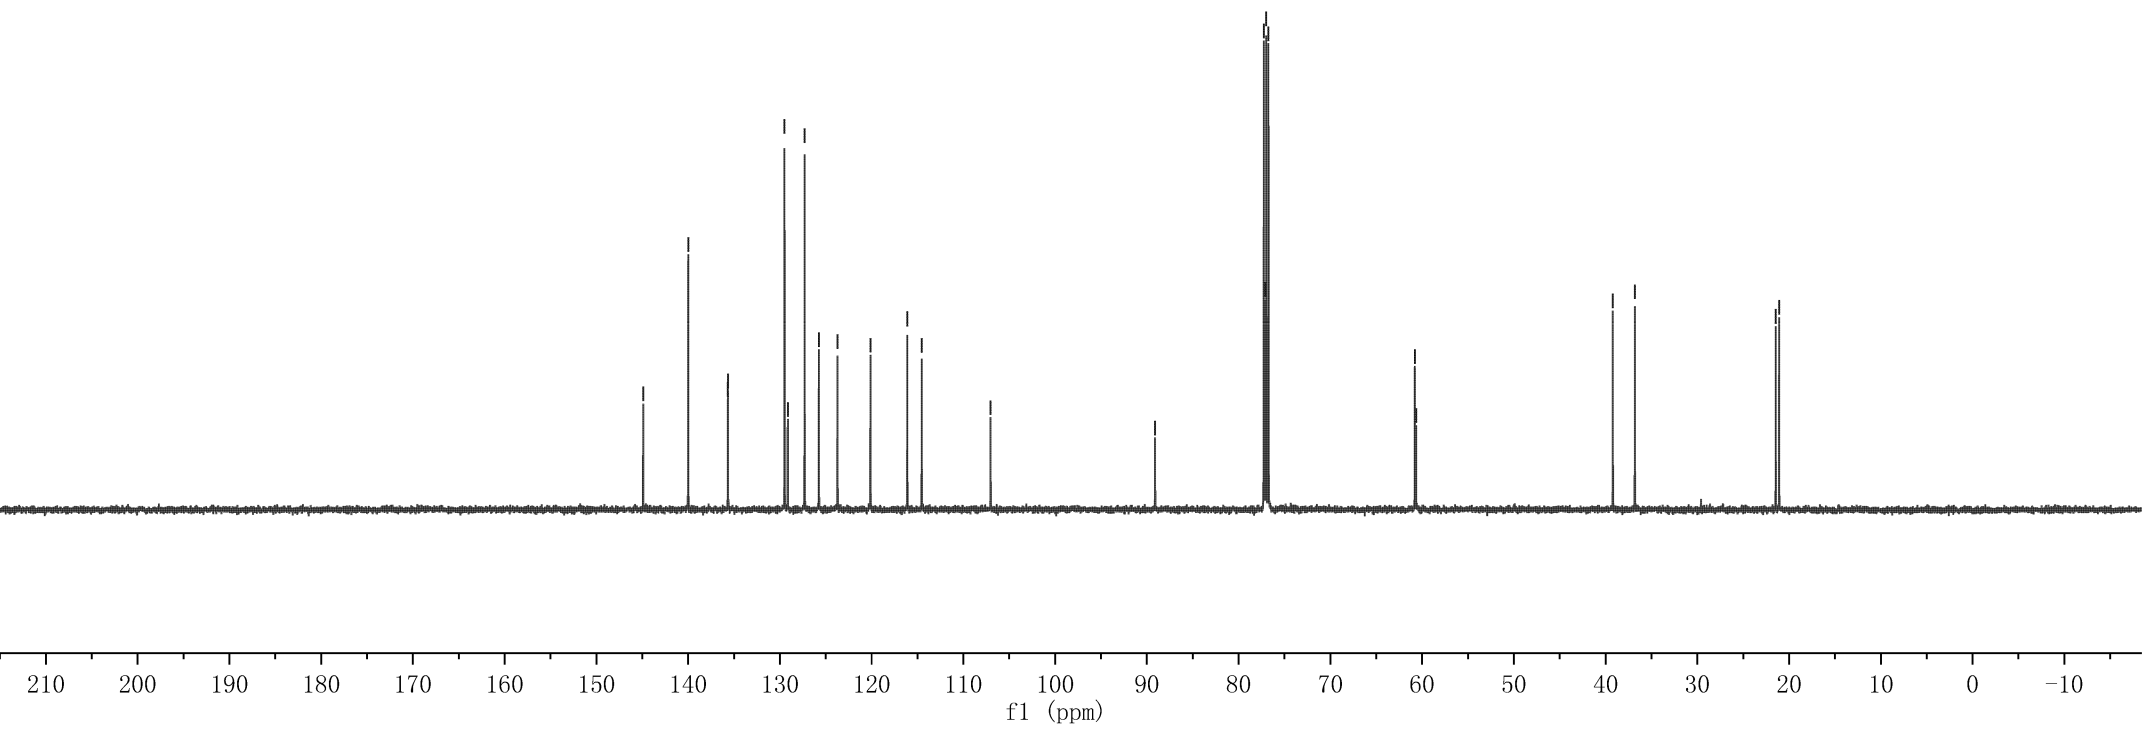

- 144.90
- 139.99
- 135.67
- 135.65
- 129.49
- 129.14
- 127.31
- 125.75
- 123.72
- 120.13
- 116.11
- 114.54
- 107.03
- 89.11
- 77.25
- 77.07
- 77.00
- 76.75
- 60.80
- 60.65
- 39.21
- 36.81
- 21.46
- 21.09

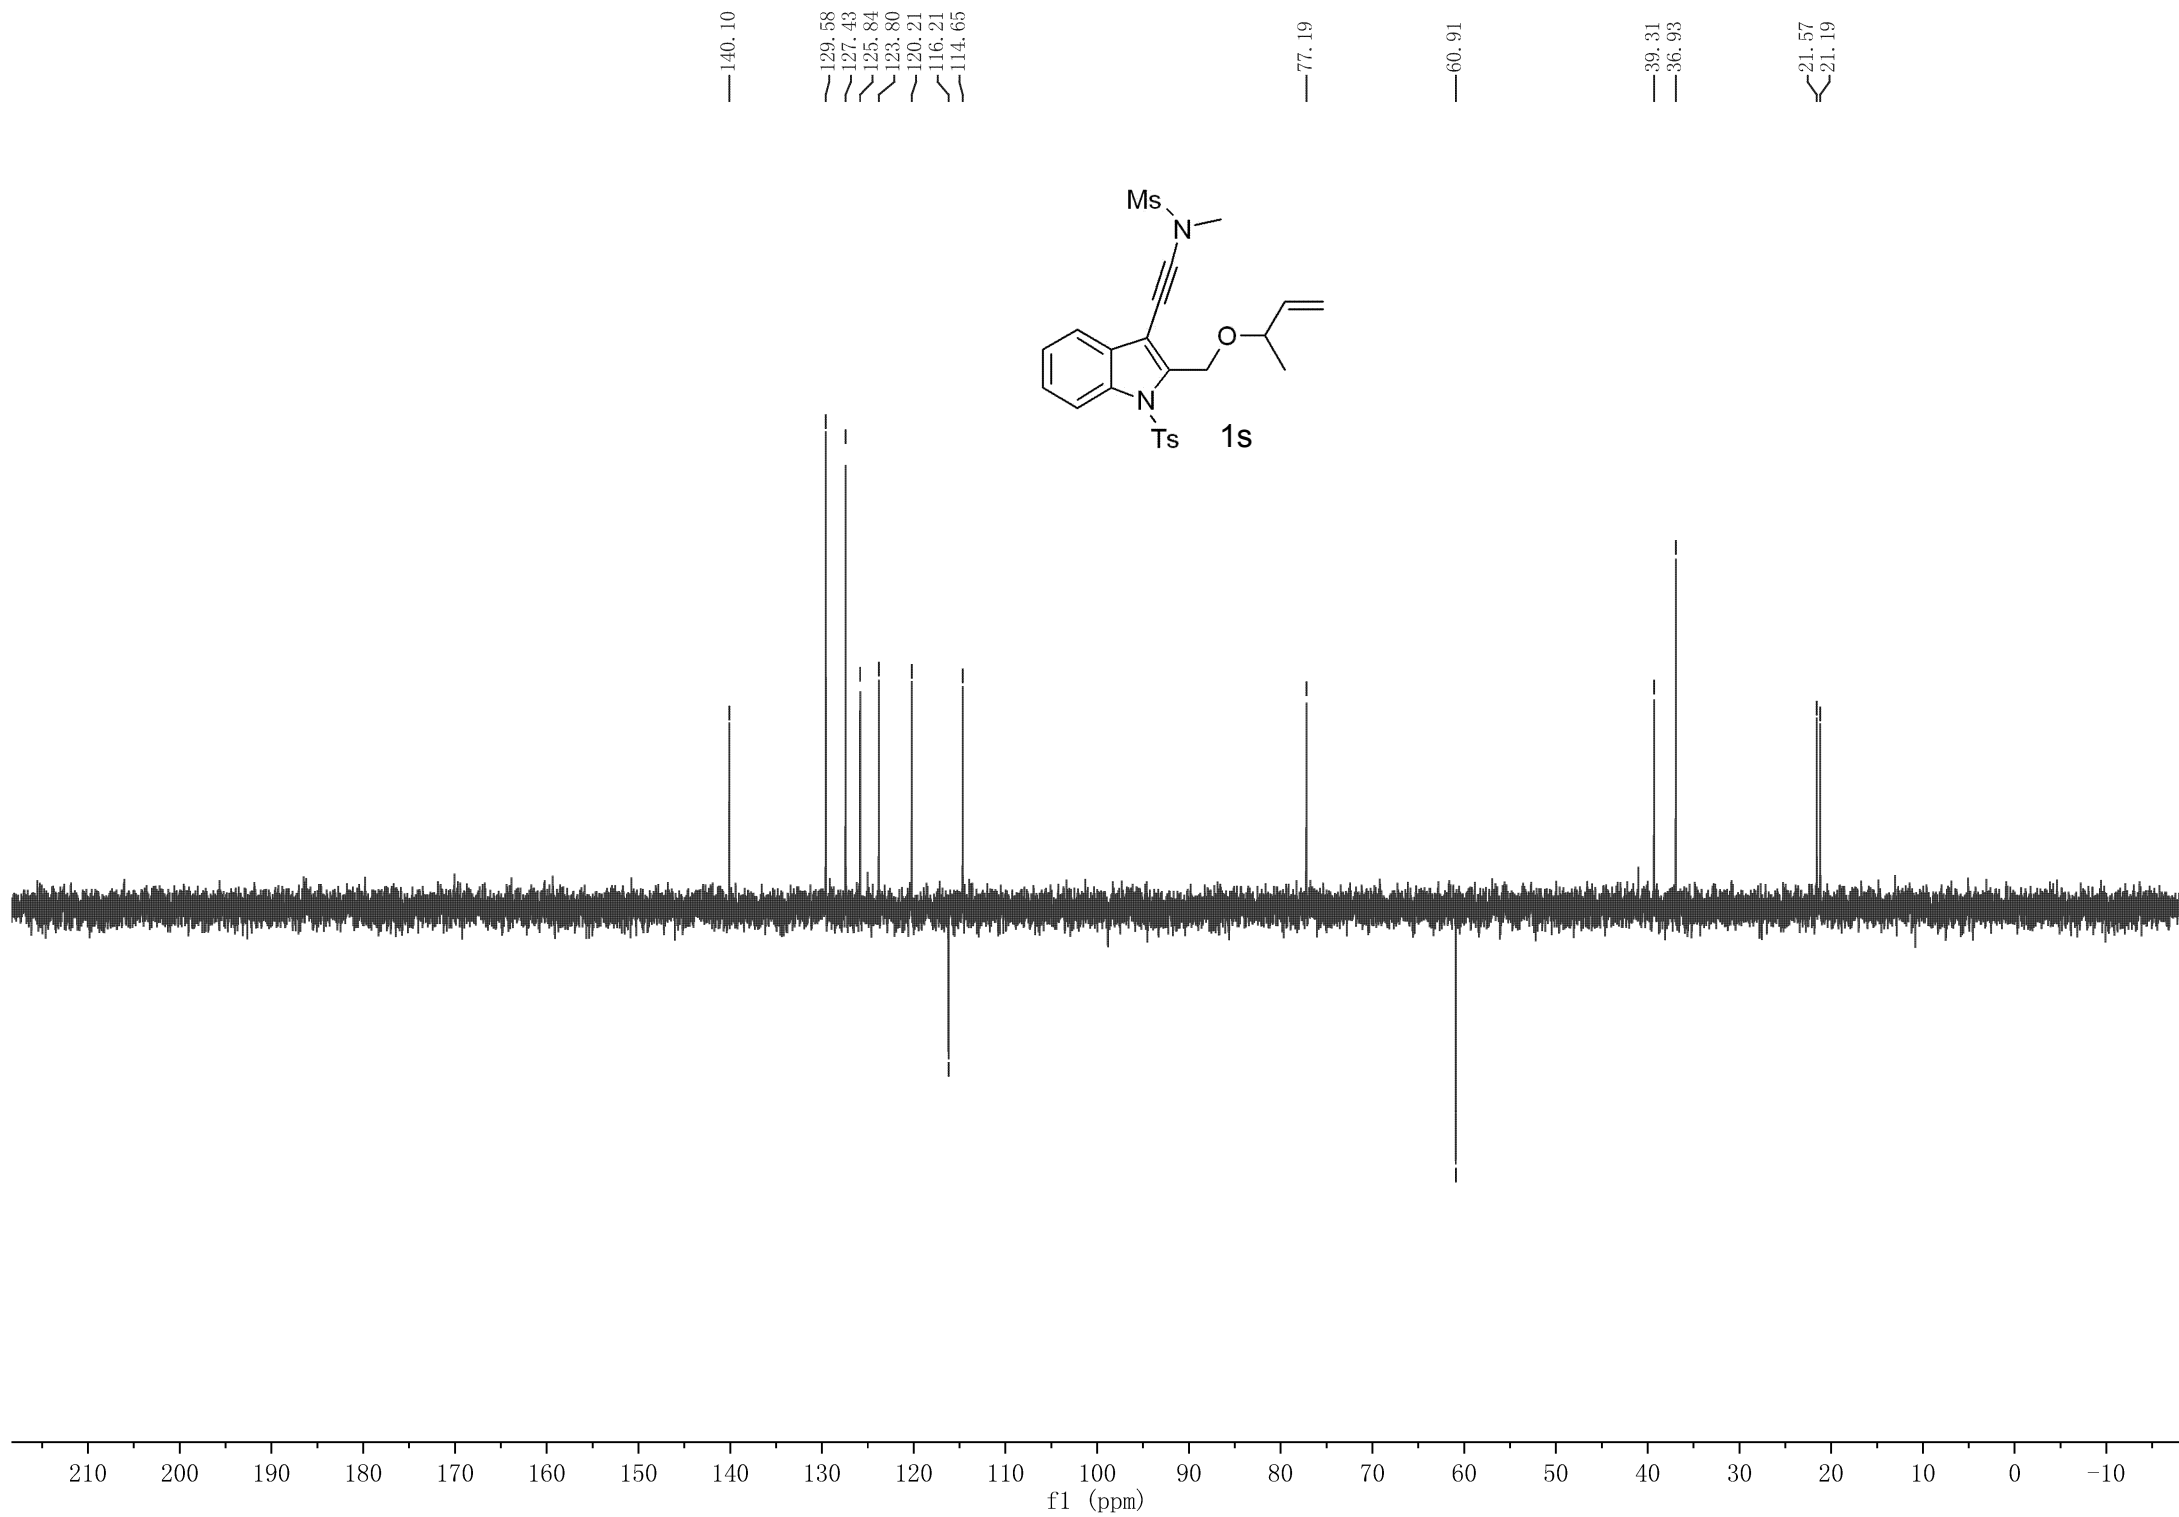

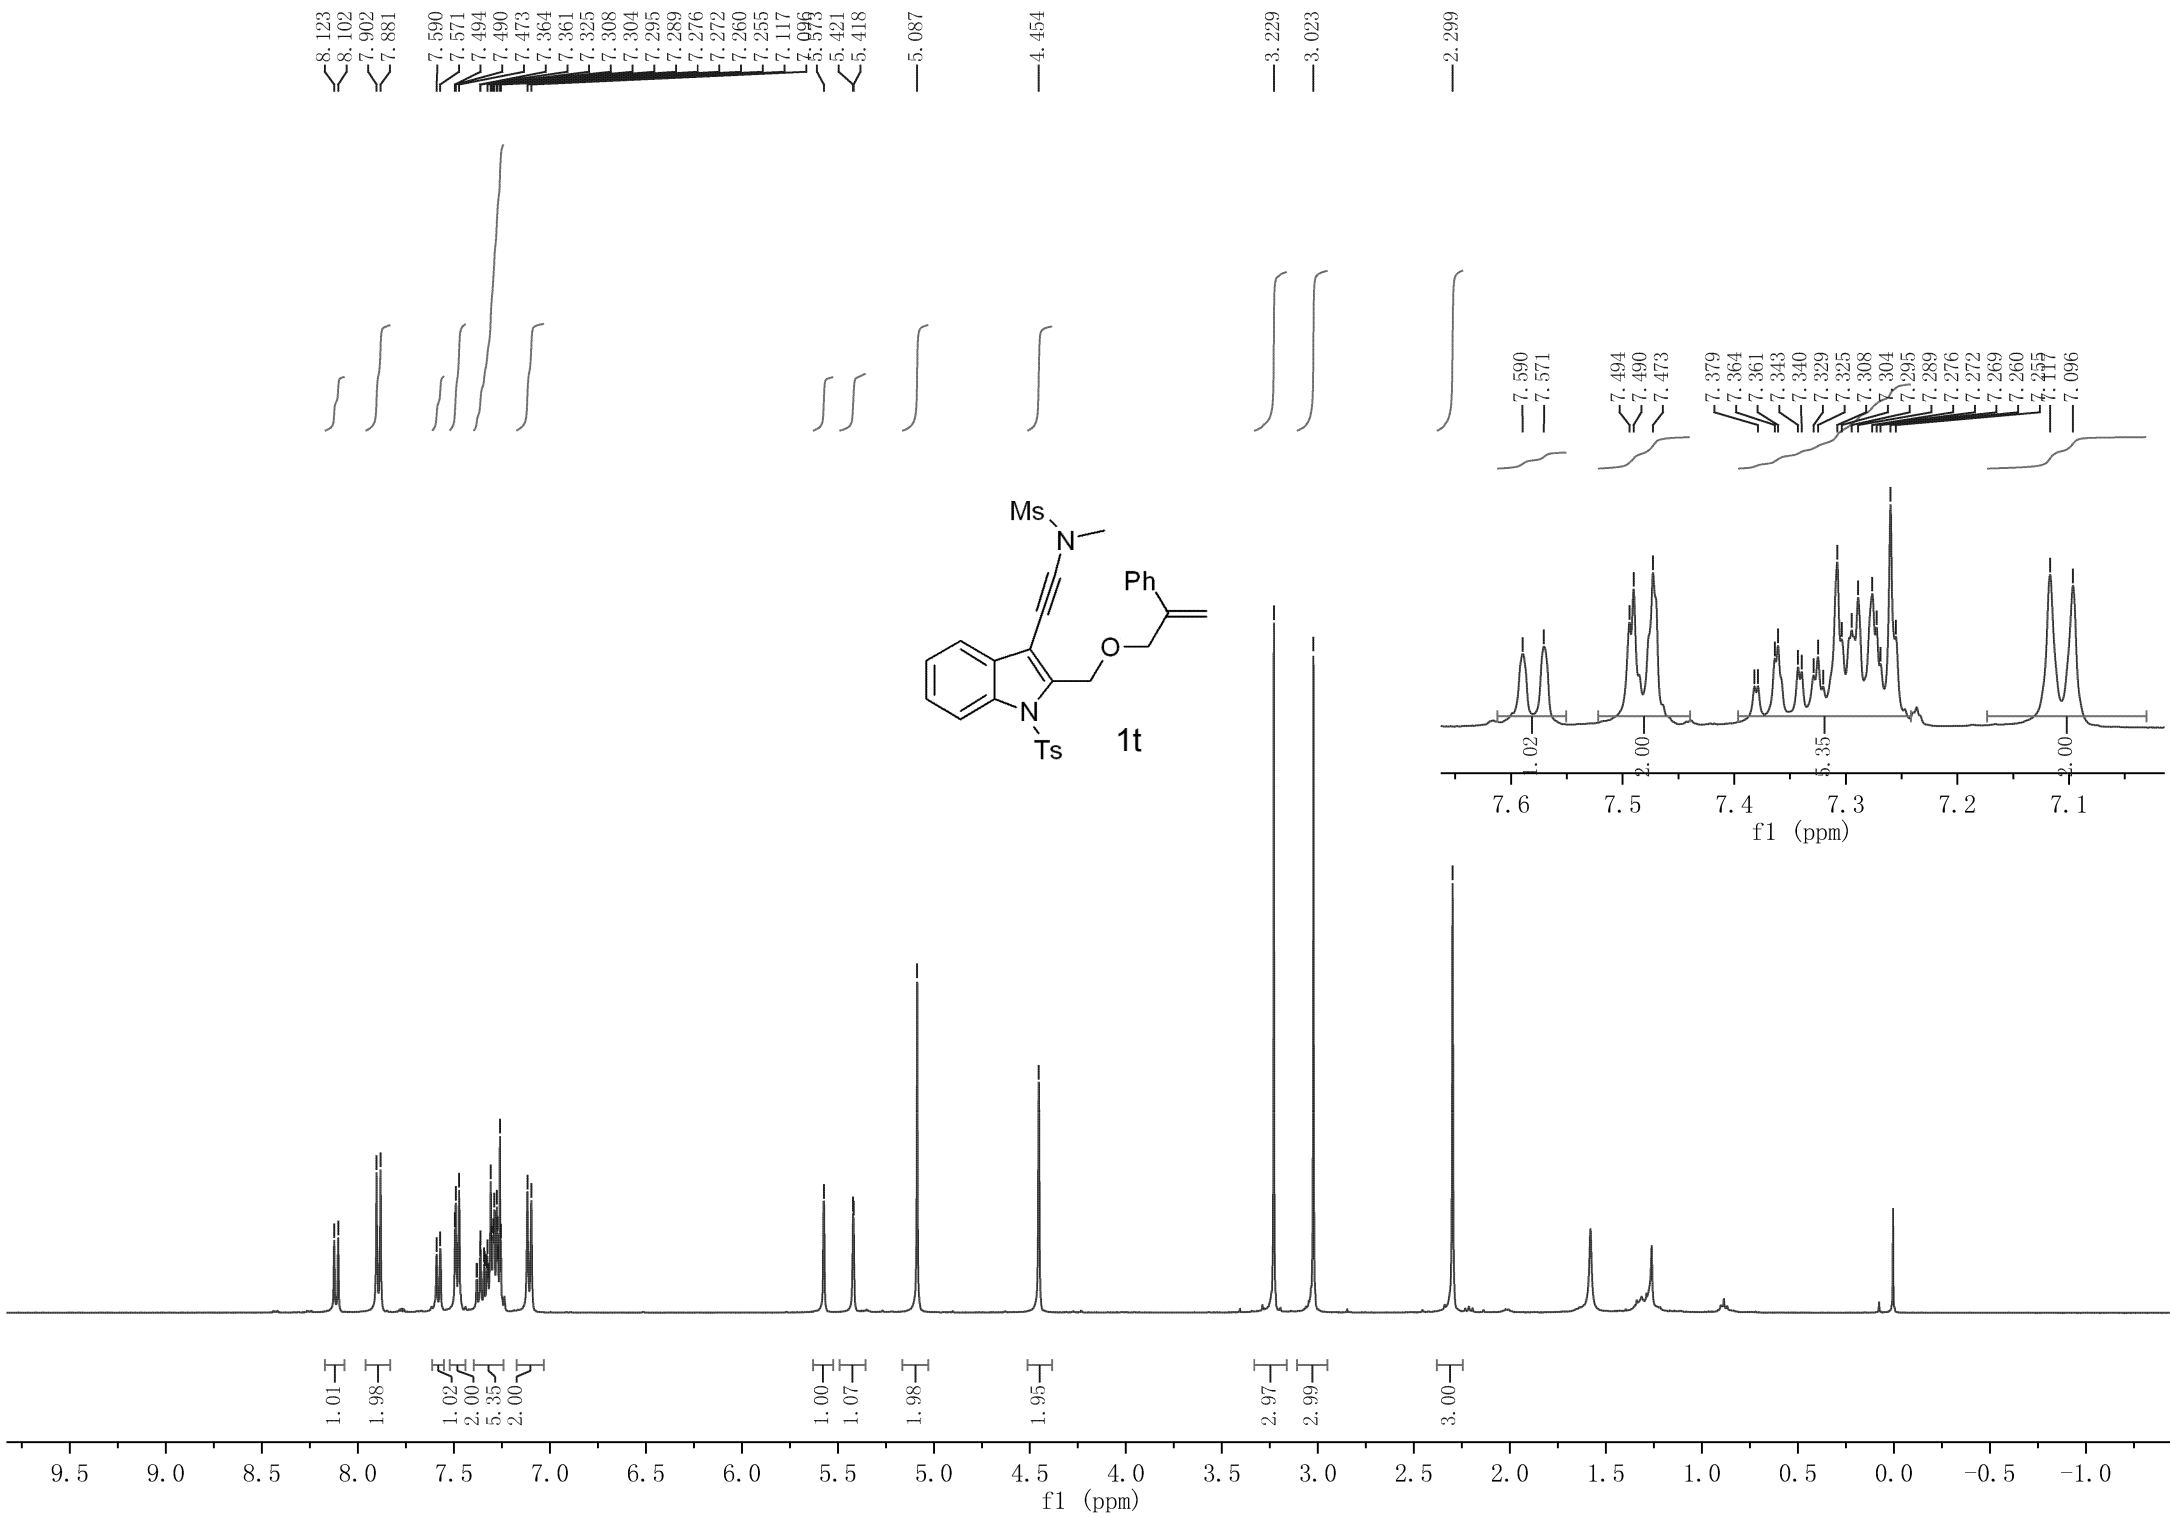



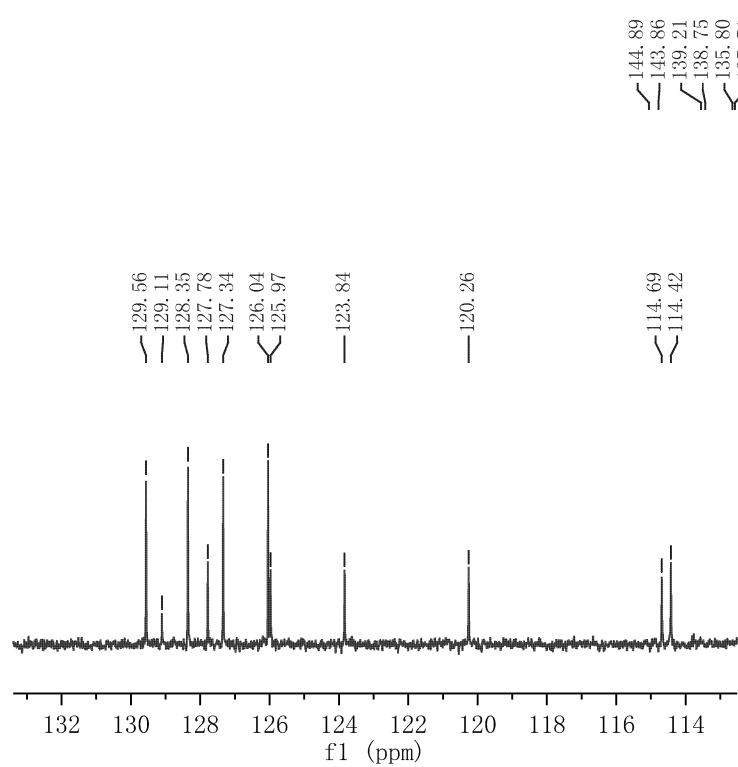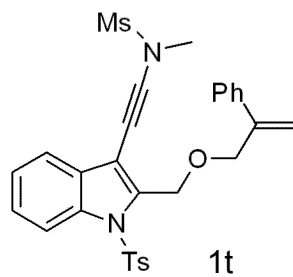

144.89  
143.86  
139.21  
138.75  
135.80  
133.51  
129.56  
128.35  
127.78  
127.34  
126.04  
120.26  
114.69  
114.42  
107.68

89.28

77.25  
77.00  
76.75  
72.07

62.67  
60.68

39.14  
36.80

21.53

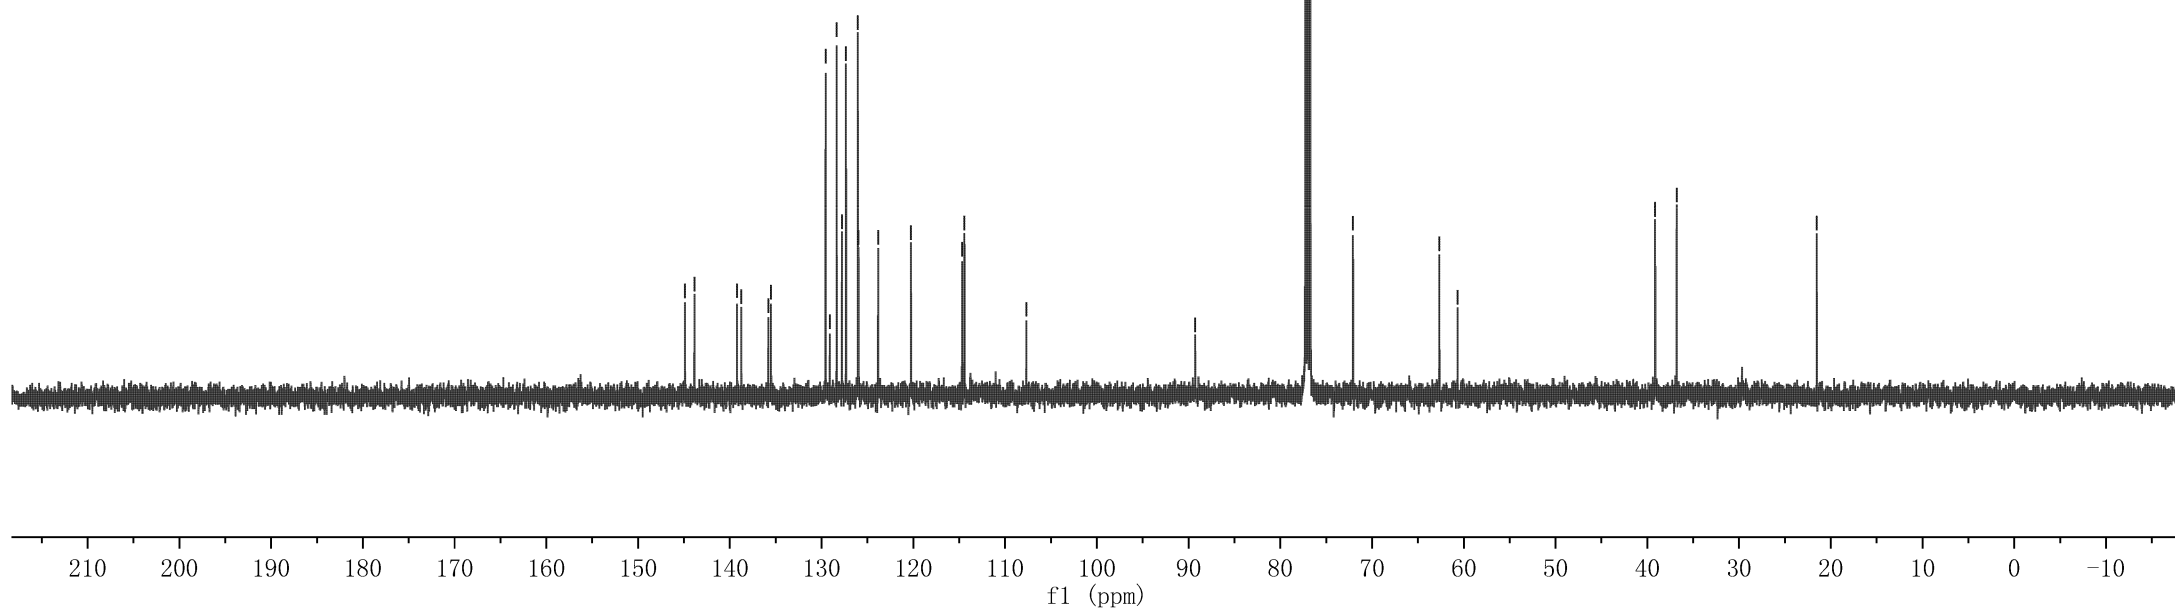

7.948  
7.910  
7.893  
7.507  
7.504  
7.500  
7.490  
7.488  
7.483  
7.467  
7.336  
7.334  
7.320  
7.317  
7.307  
7.305  
7.280  
7.265  
7.260  
7.127  
7.111  
5.587  
5.586  
5.431  
5.429  
5.083  
4.457  
3.234  
3.026  
2.500  
2.299

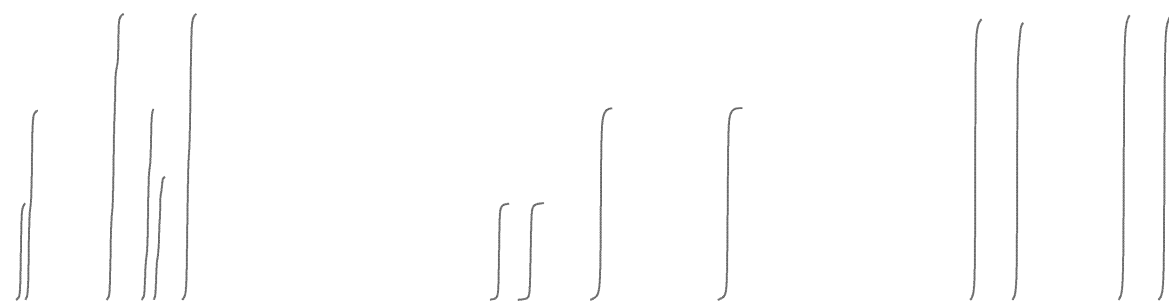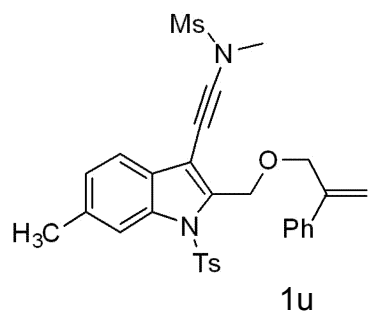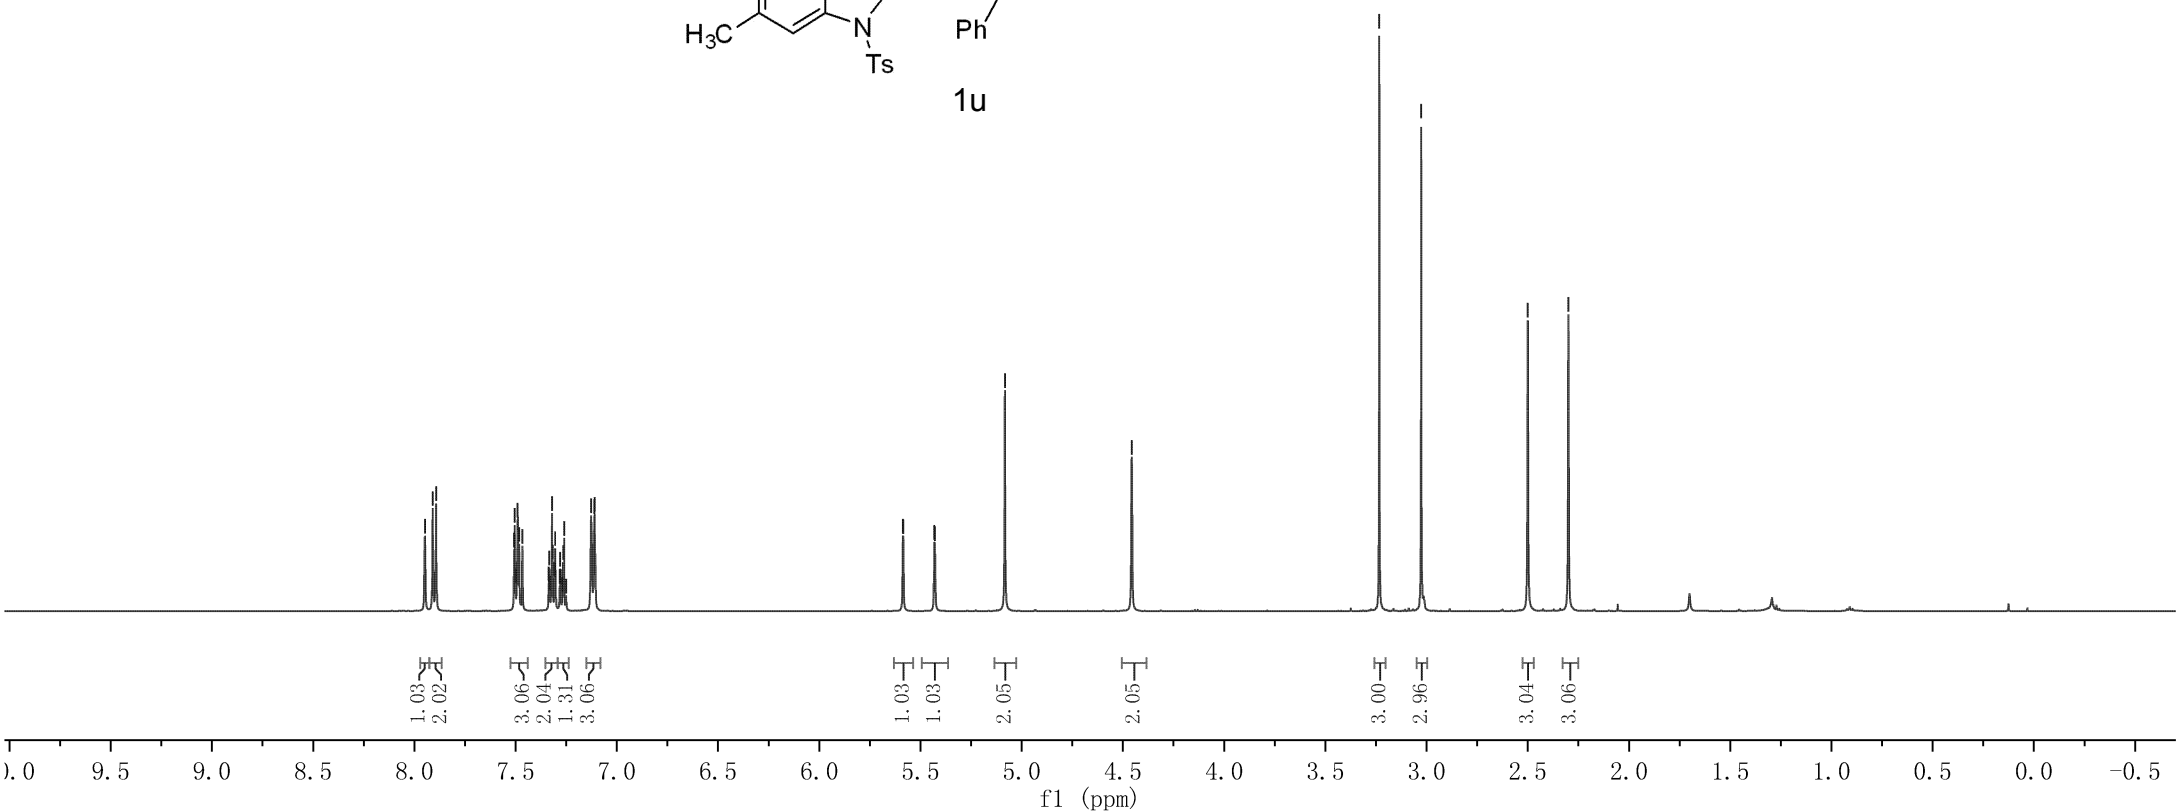

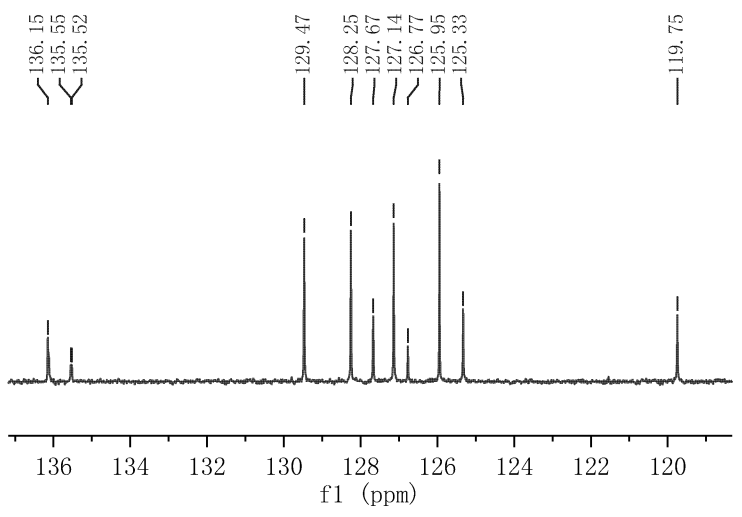

- 144.73
- 143.82
- 138.68
- 138.46
- 136.15
- 129.47
- 128.25
- 127.14
- 125.95
- 119.75
- 114.63
- 114.24
- 107.62
- 89.14
- 77.26
- 77.00
- 76.75
- 71.86
- 62.64
- 60.69
- 39.06
- 36.65
- 22.03
- 21.40

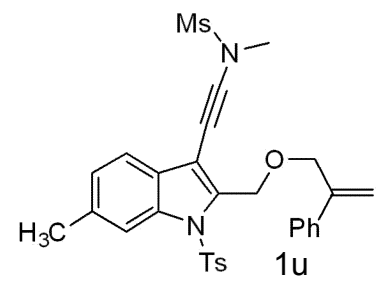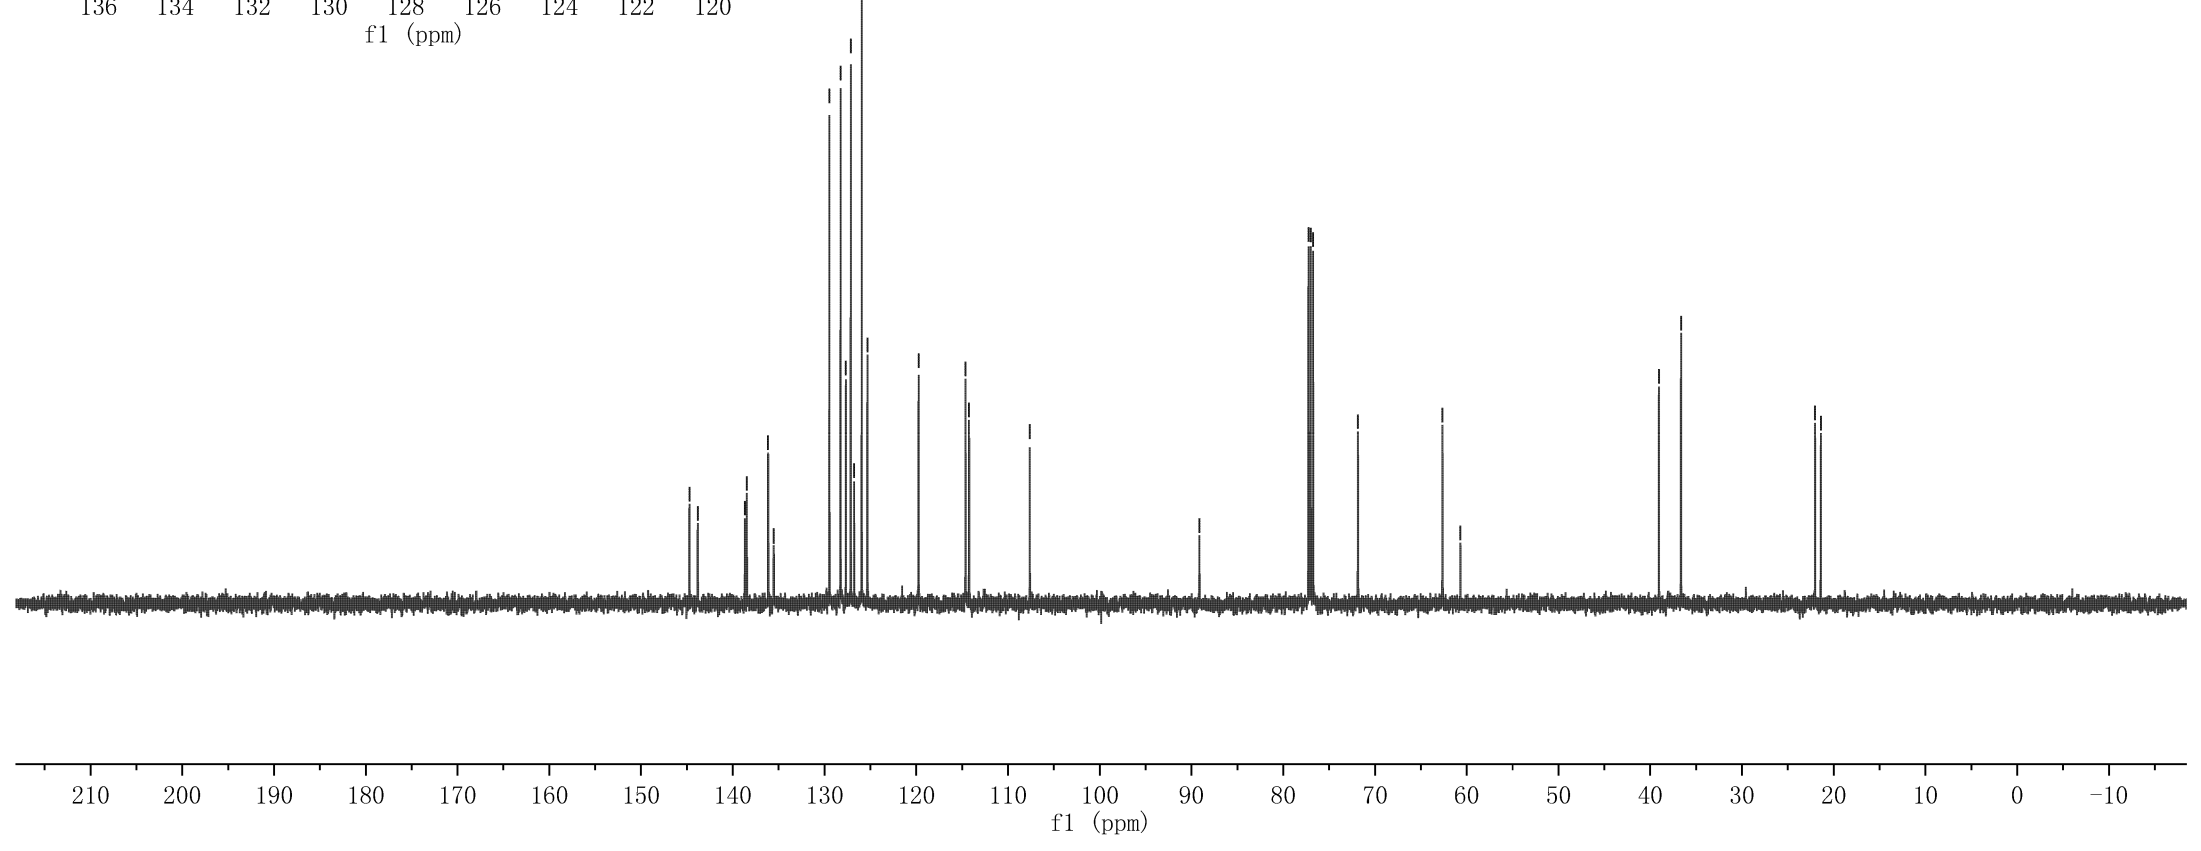

8.040  
8.018  
7.866  
7.845  
7.528  
7.523  
7.482  
7.465  
7.318  
7.302  
7.282  
7.263  
7.243  
7.110  
7.090

5.574  
5.408

5.051

4.450

3.225

3.016

2.288

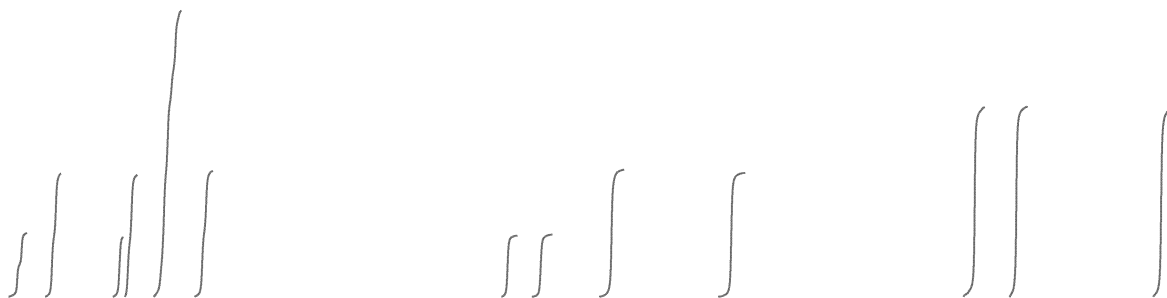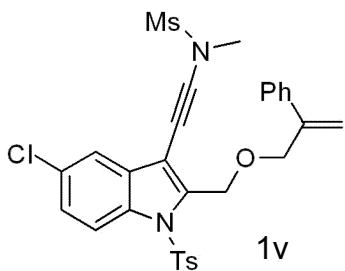

1.02  
1.97  
0.96  
1.94  
4.57  
2.01

0.98  
0.99

2.03

1.98

3.03

3.04

3.00

9.5 9.0 8.5 8.0 7.5 7.0 6.5 6.0 5.5 5.0 4.5 4.0 3.5 3.0 2.5 2.0 1.5 1.0 0.5 0.0 -0.5 -1.0

f1 (ppm)

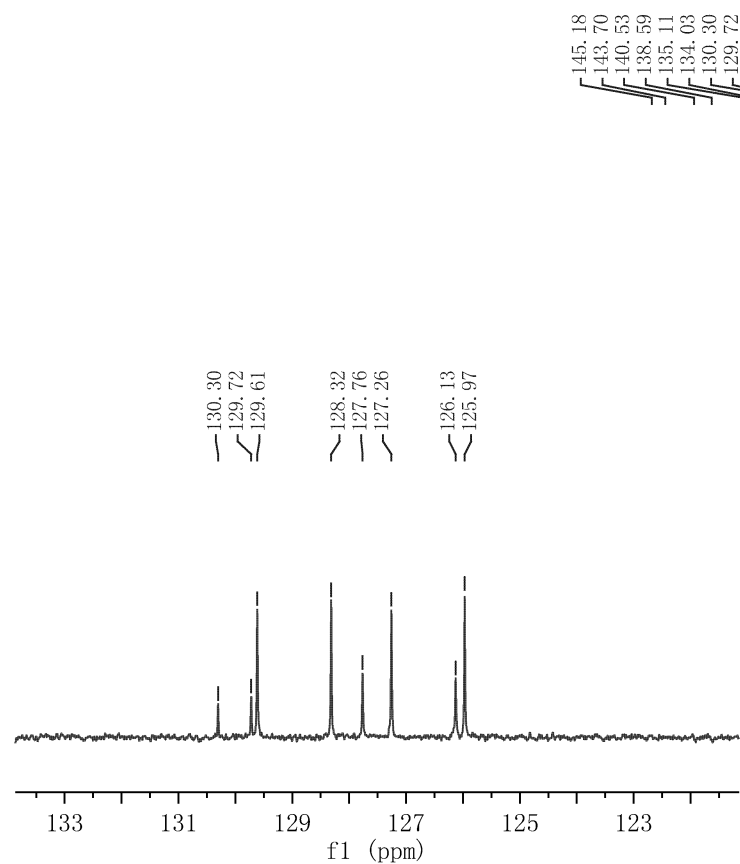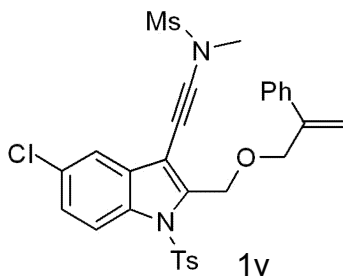

145.18  
143.70  
140.53  
138.59  
135.11  
134.03  
130.30  
129.72  
129.61  
128.32  
127.76  
127.26  
126.13  
125.97  
119.79  
115.77  
114.54  
106.96

89.54

77.32  
77.00  
76.68  
72.20

62.49  
59.90

39.07  
36.87

21.48

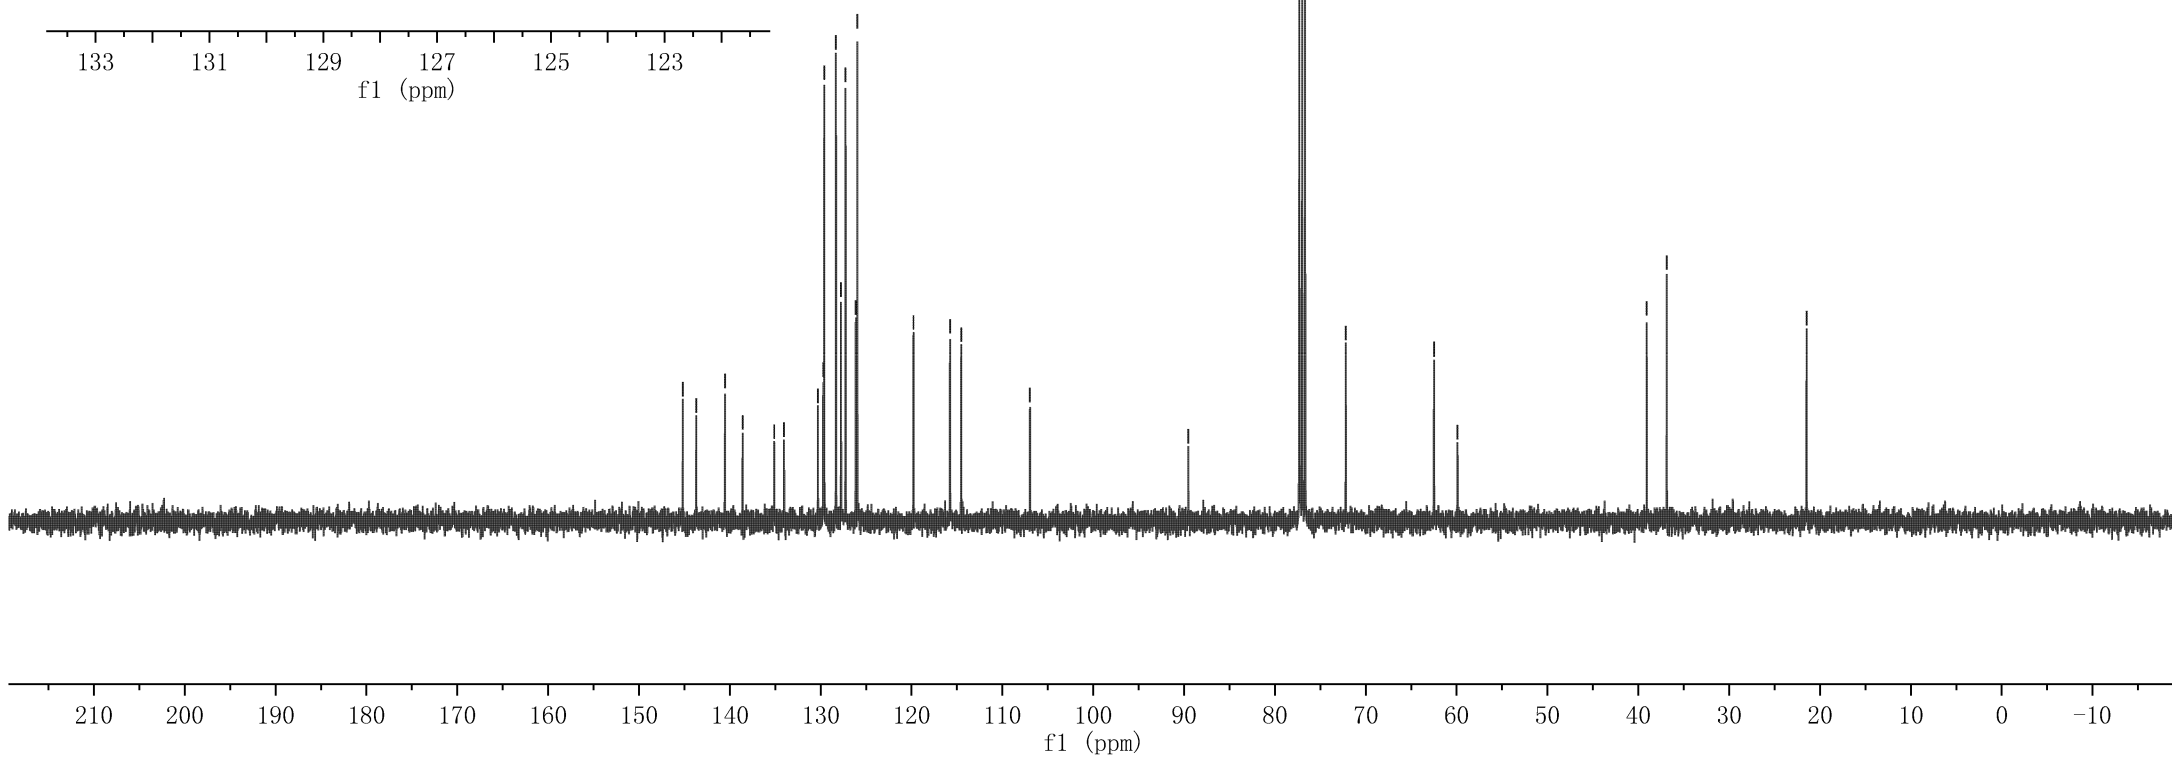

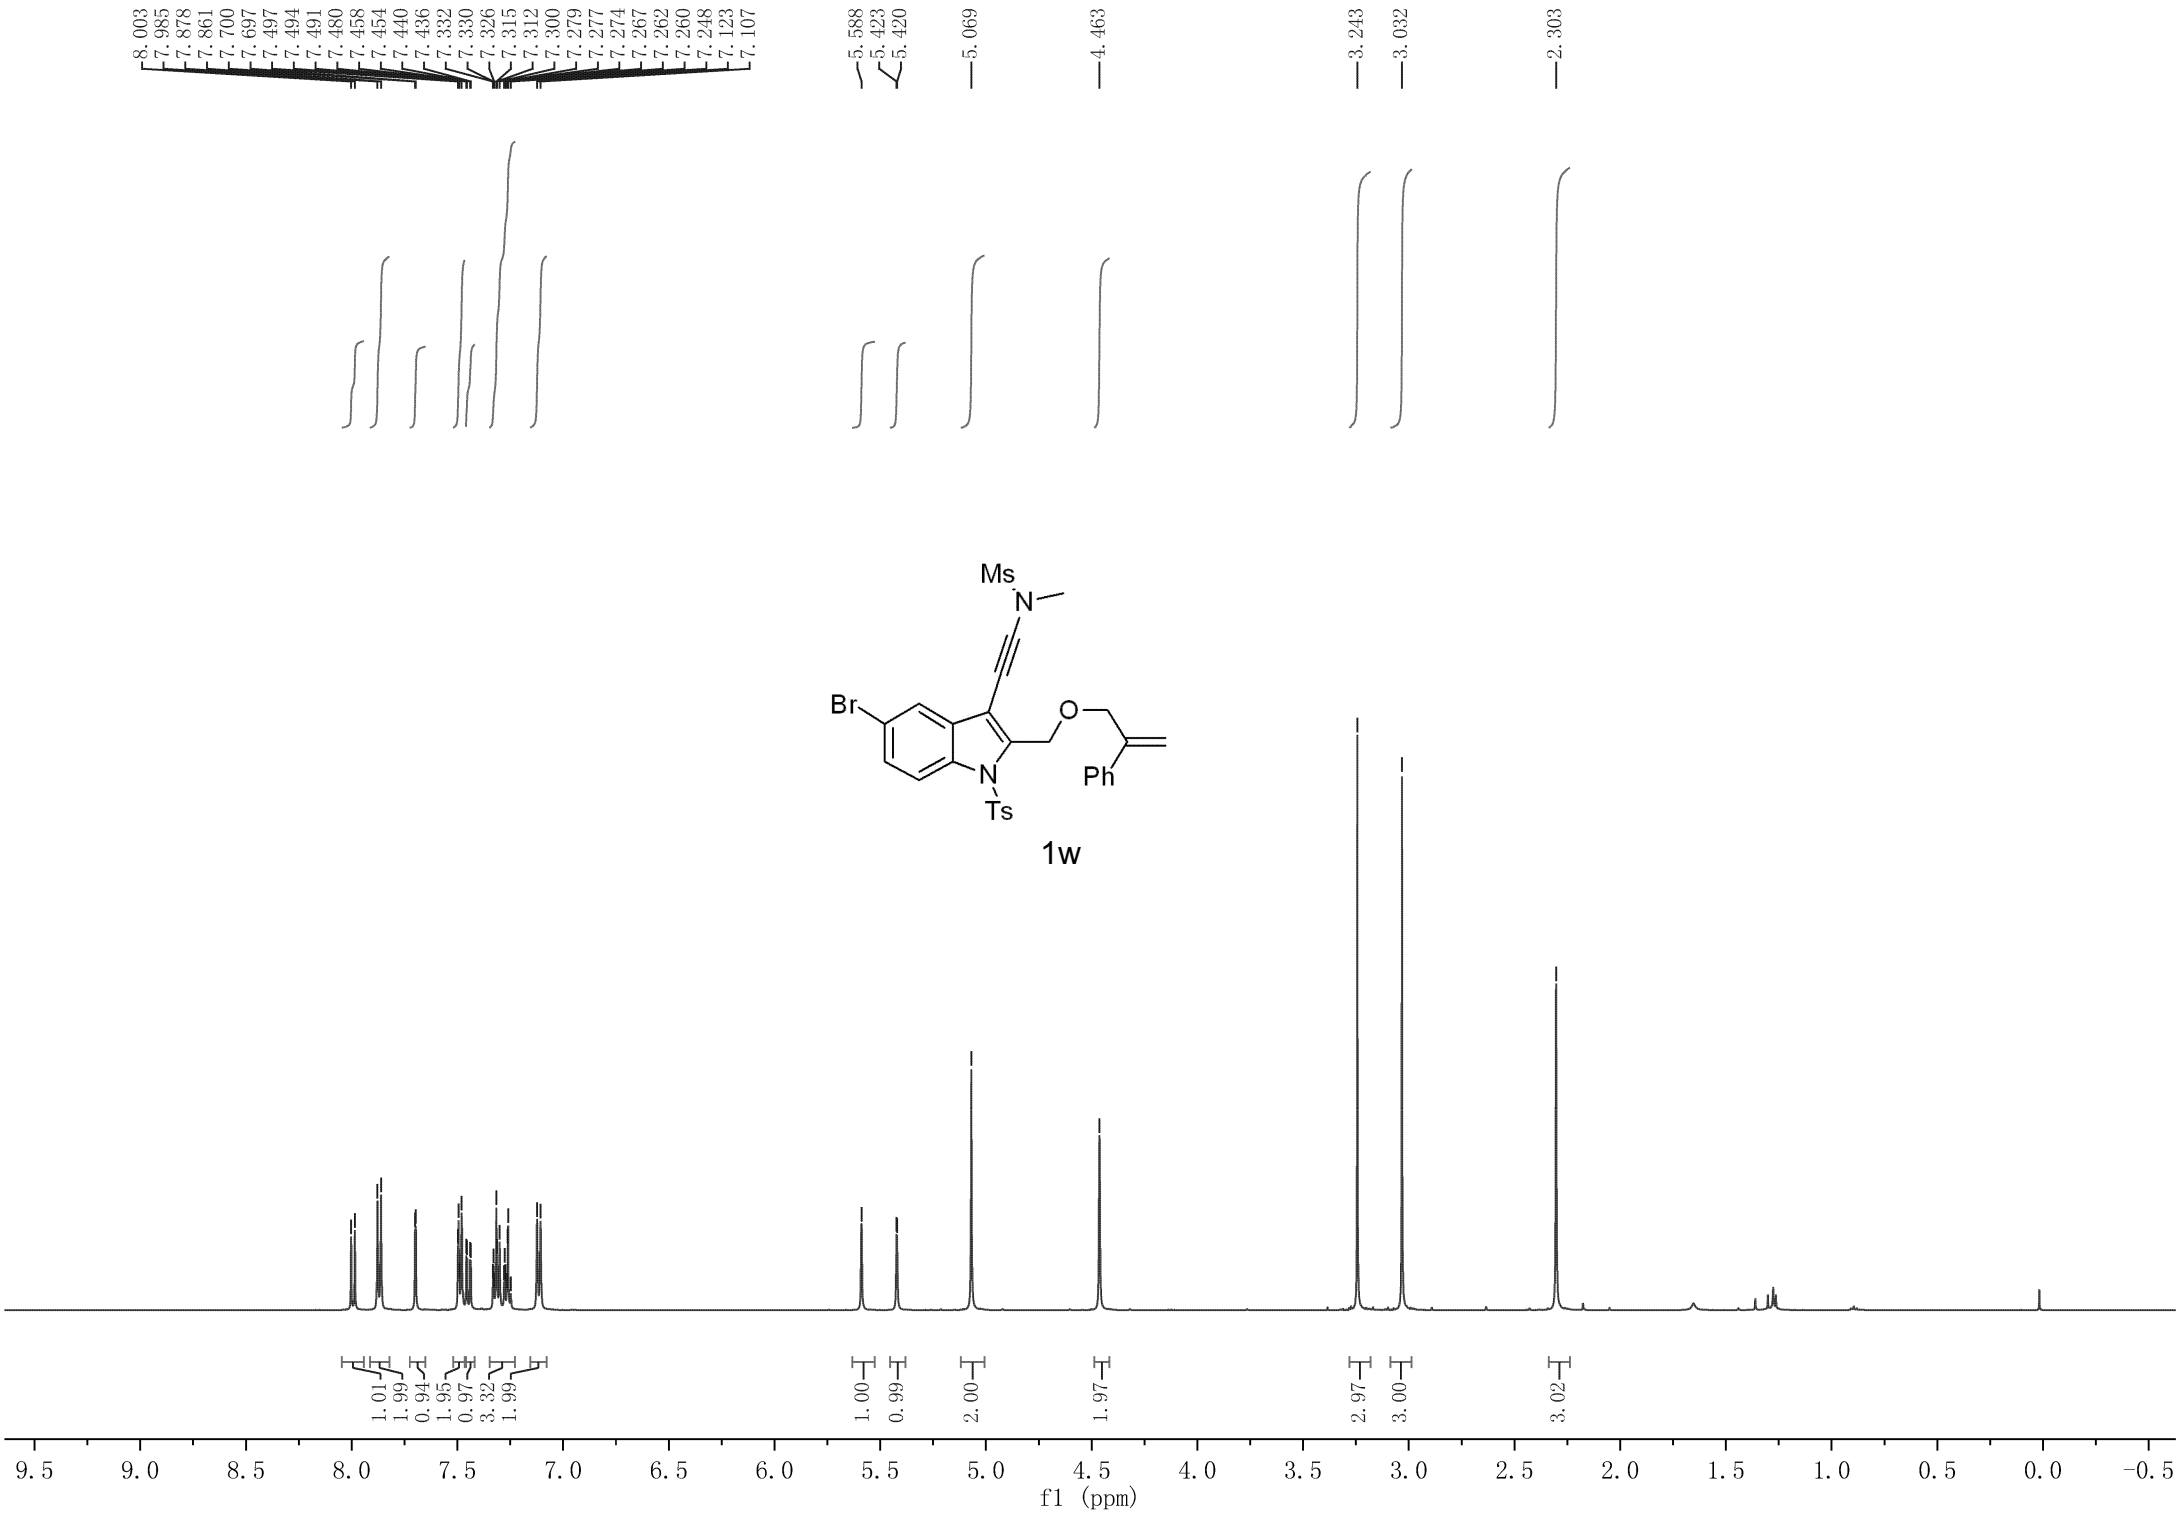

145.18  
143.74  
140.43  
138.62  
135.15  
134.44  
130.75  
129.61  
128.78  
128.31  
127.75  
127.25  
125.97  
122.86  
117.34  
116.12  
114.52  
106.82

89.56

77.25  
77.00  
76.75  
72.22

62.48  
59.91

39.06  
36.90

21.47

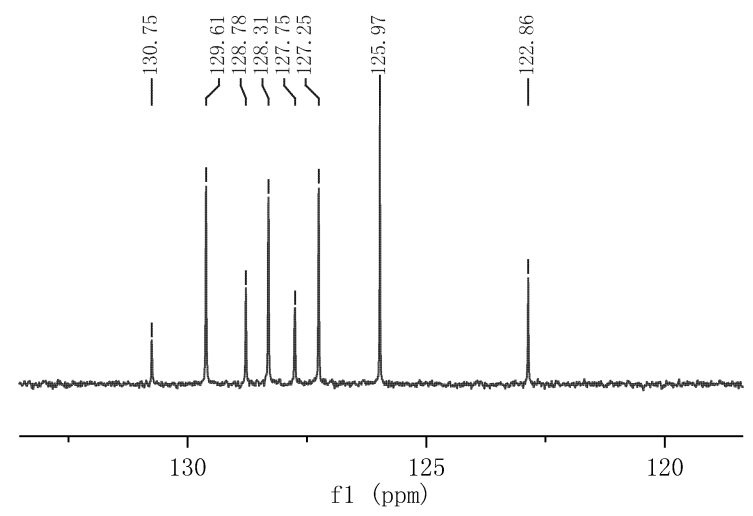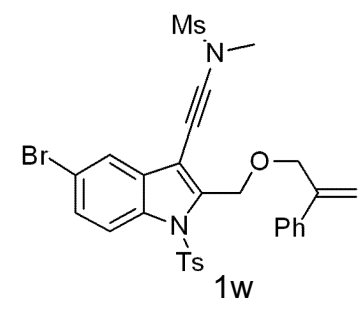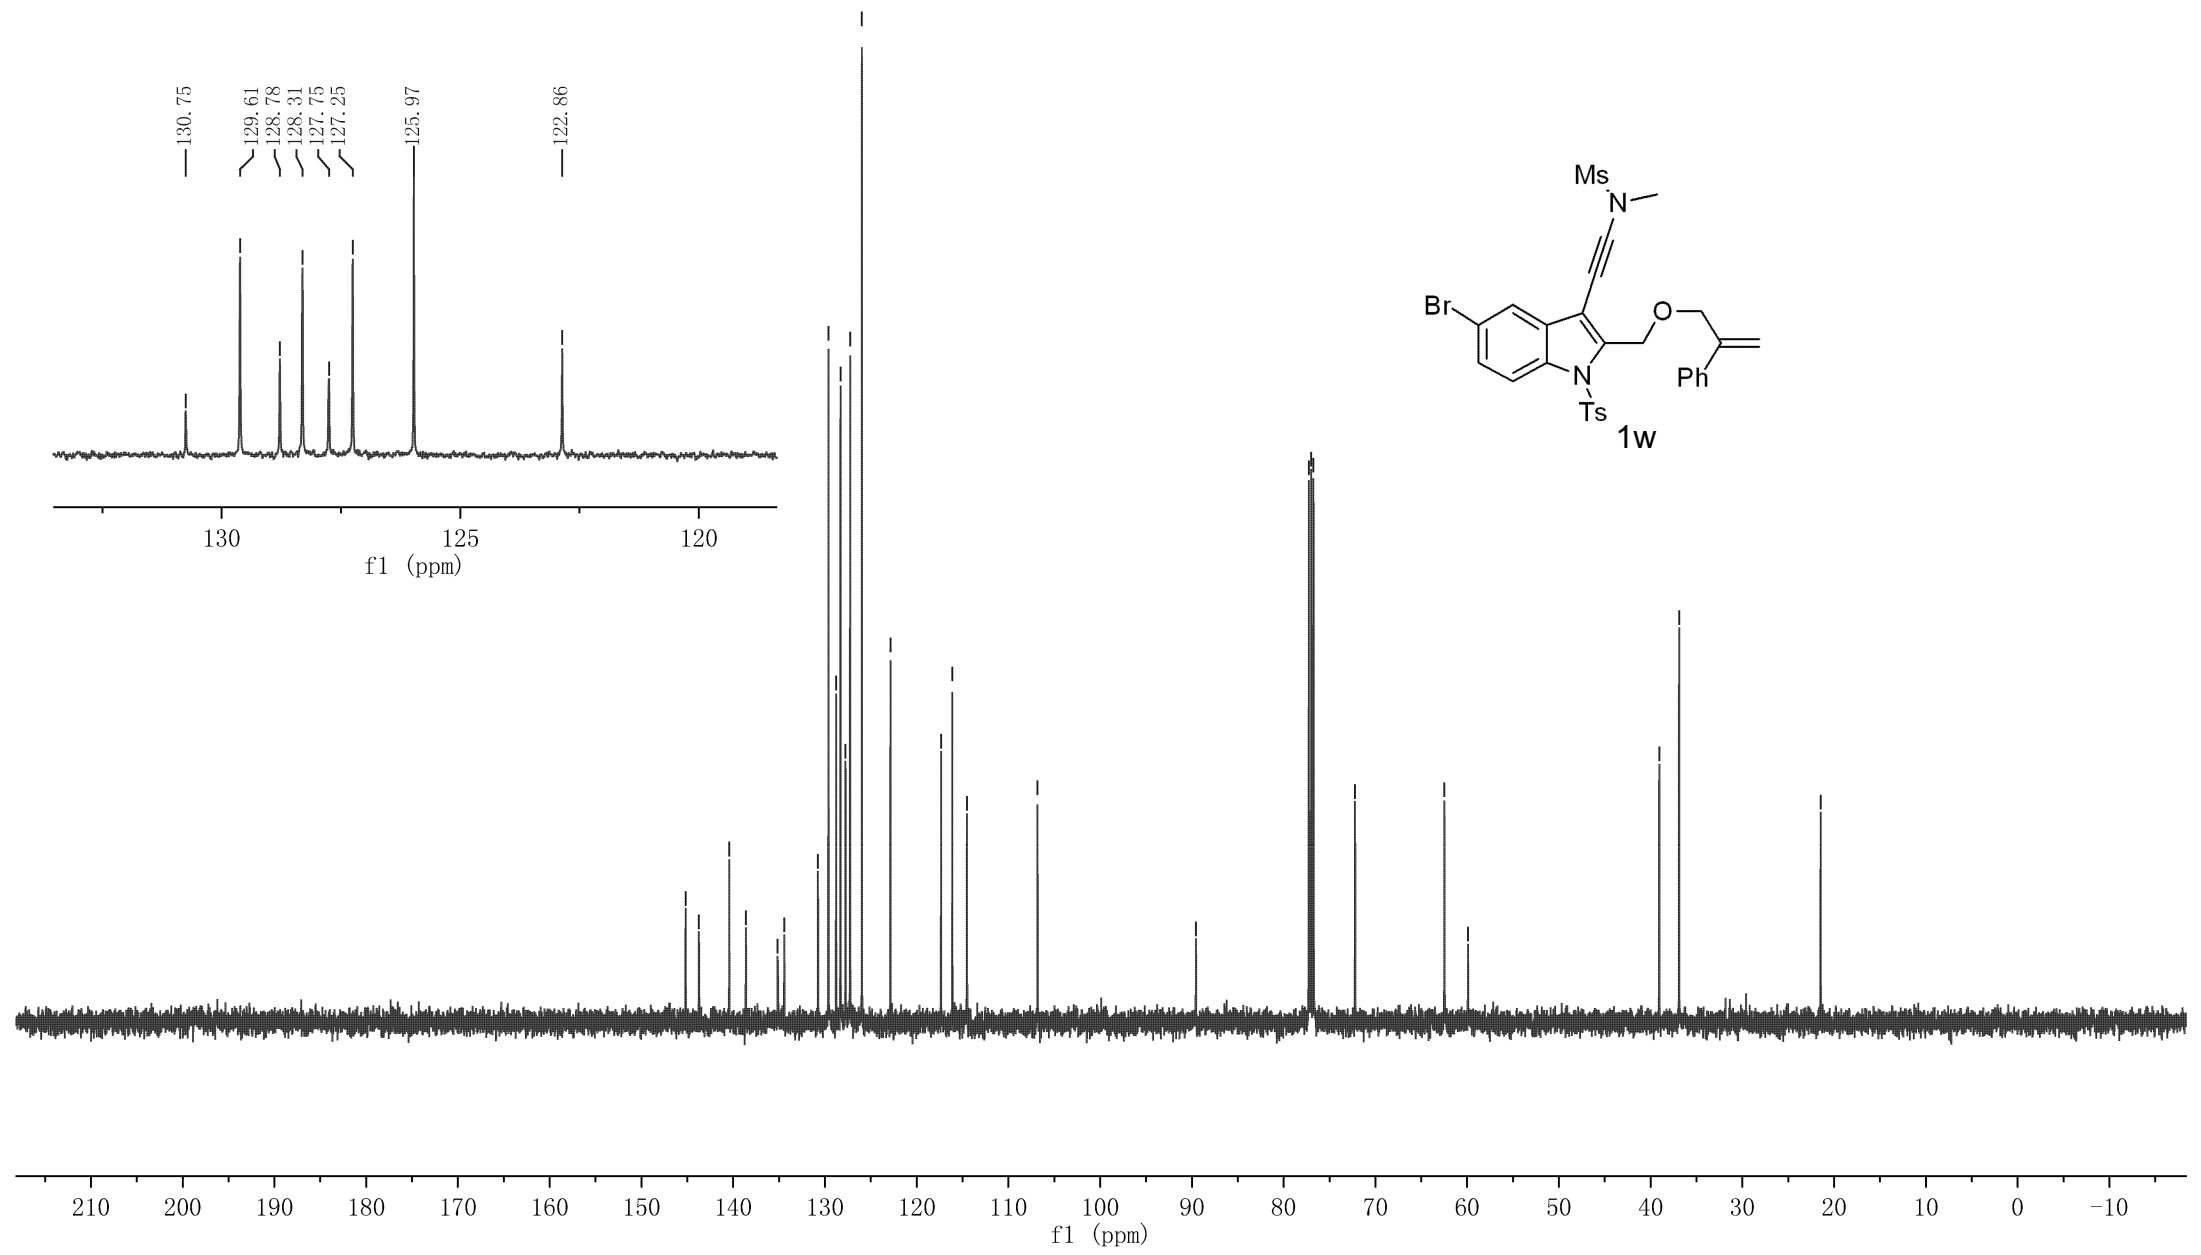

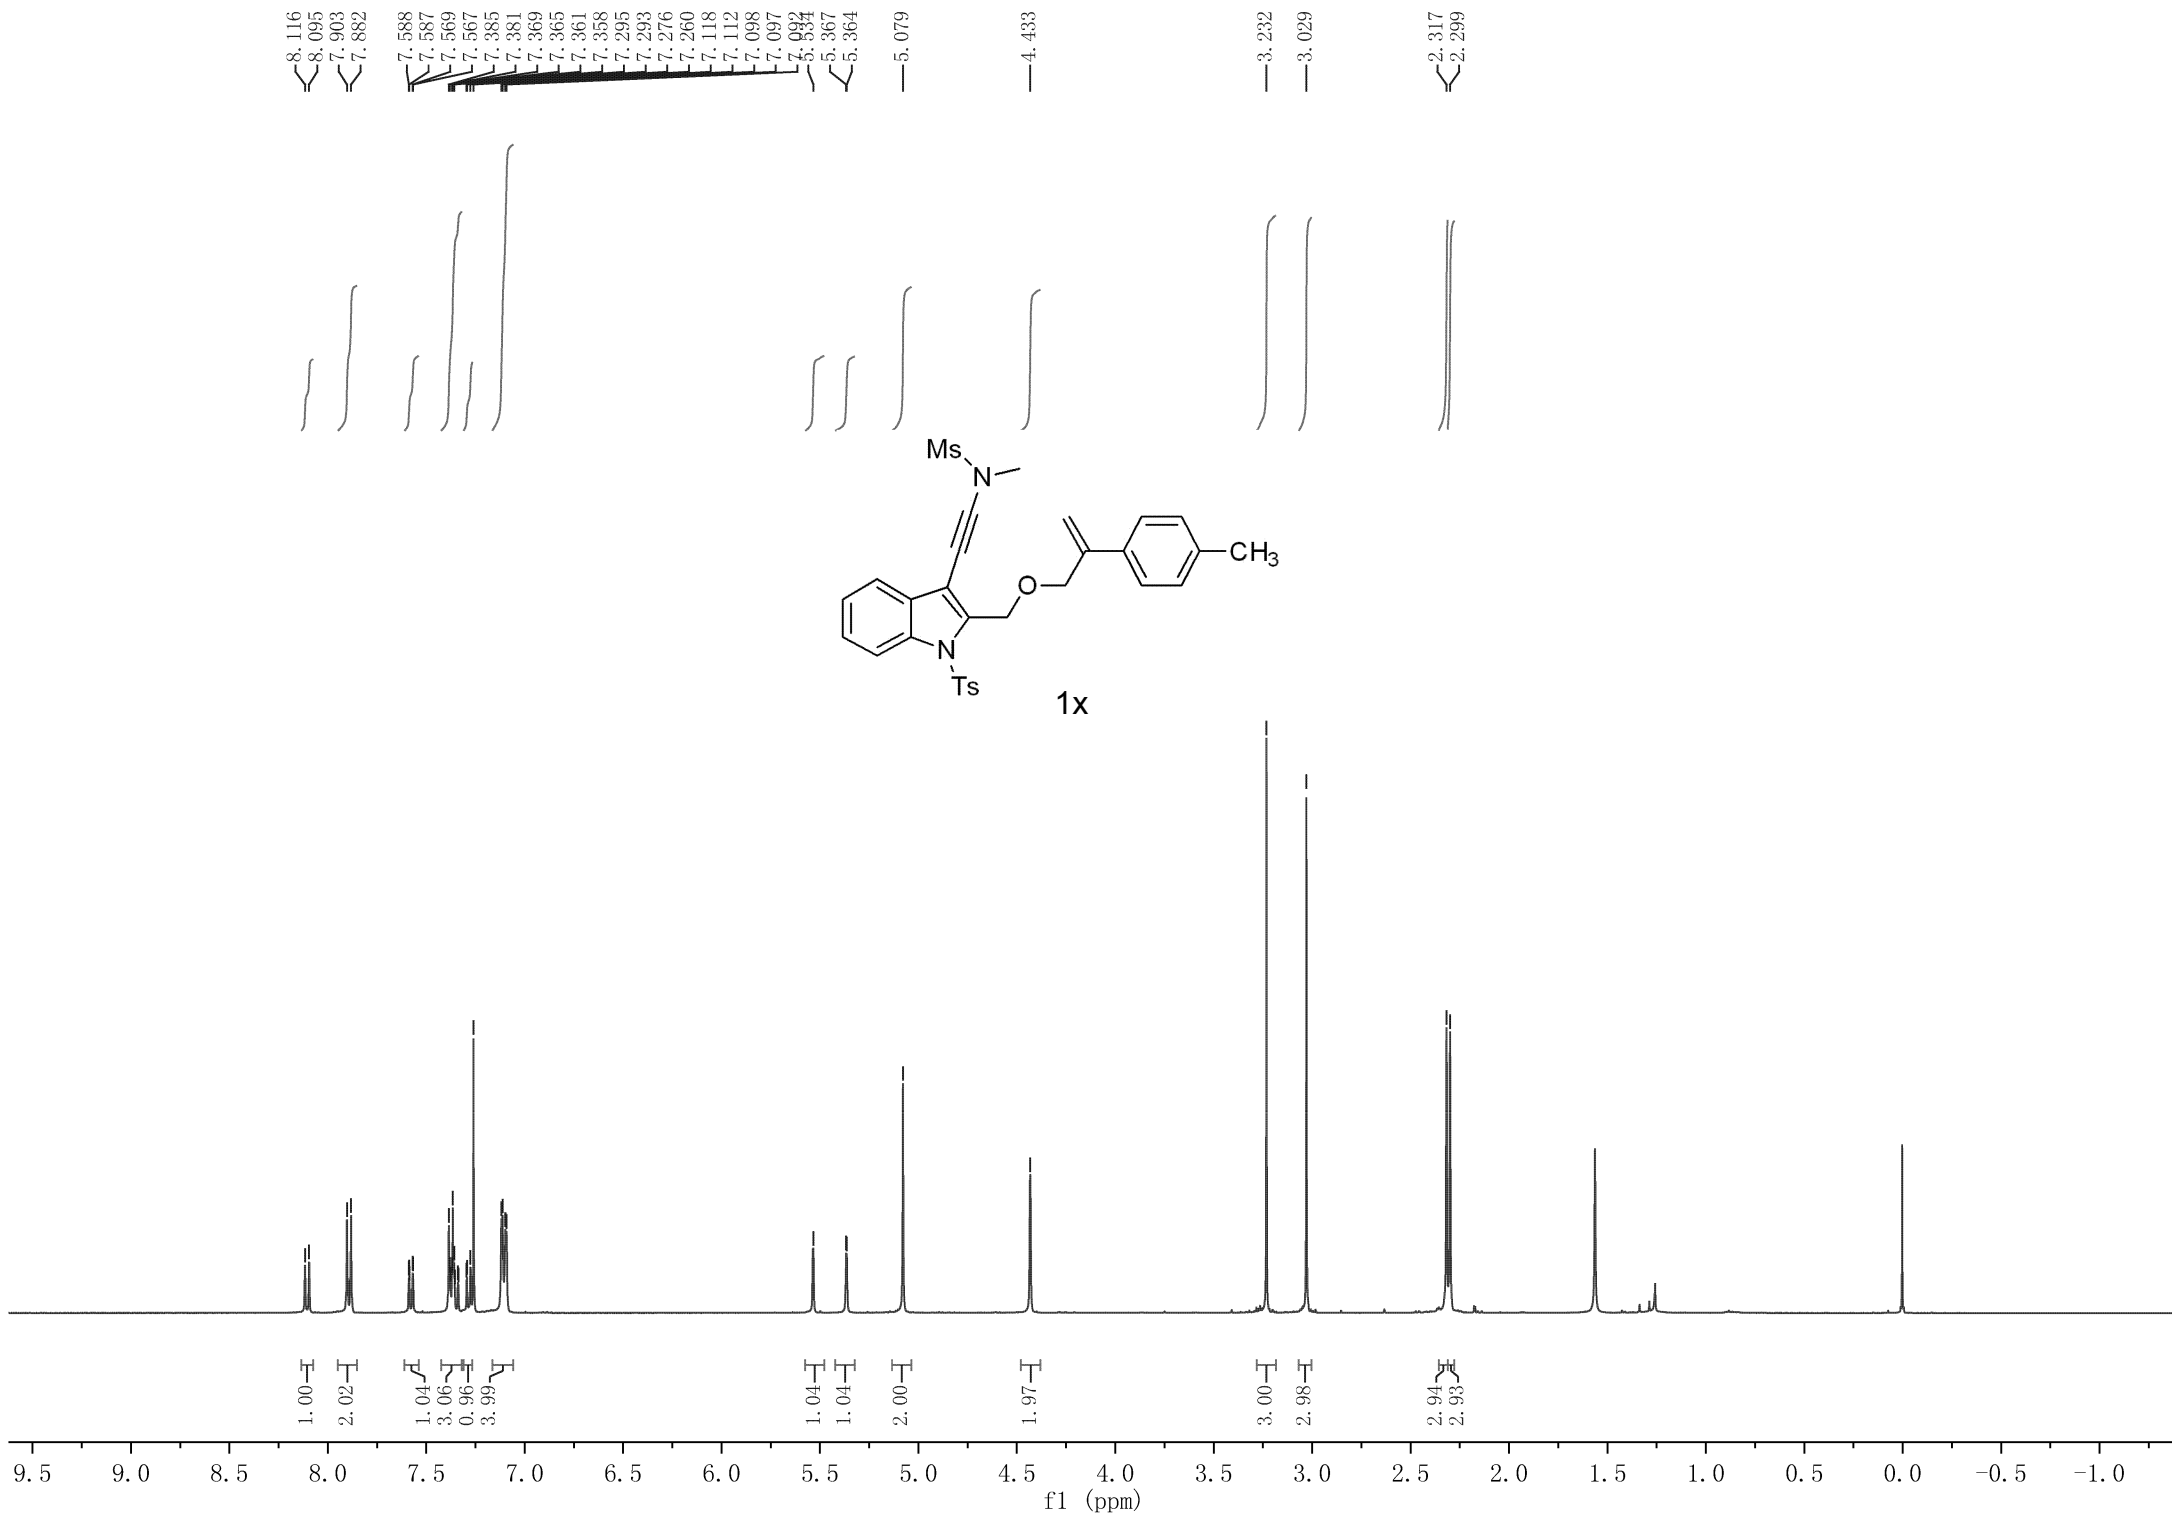



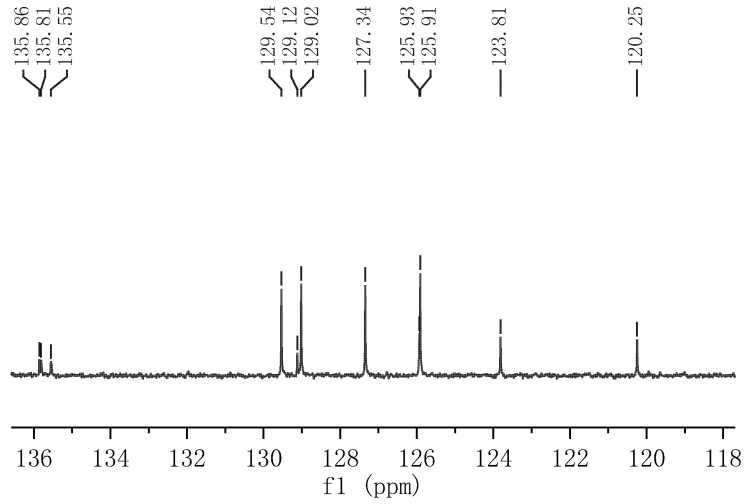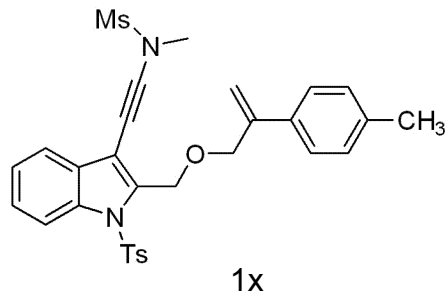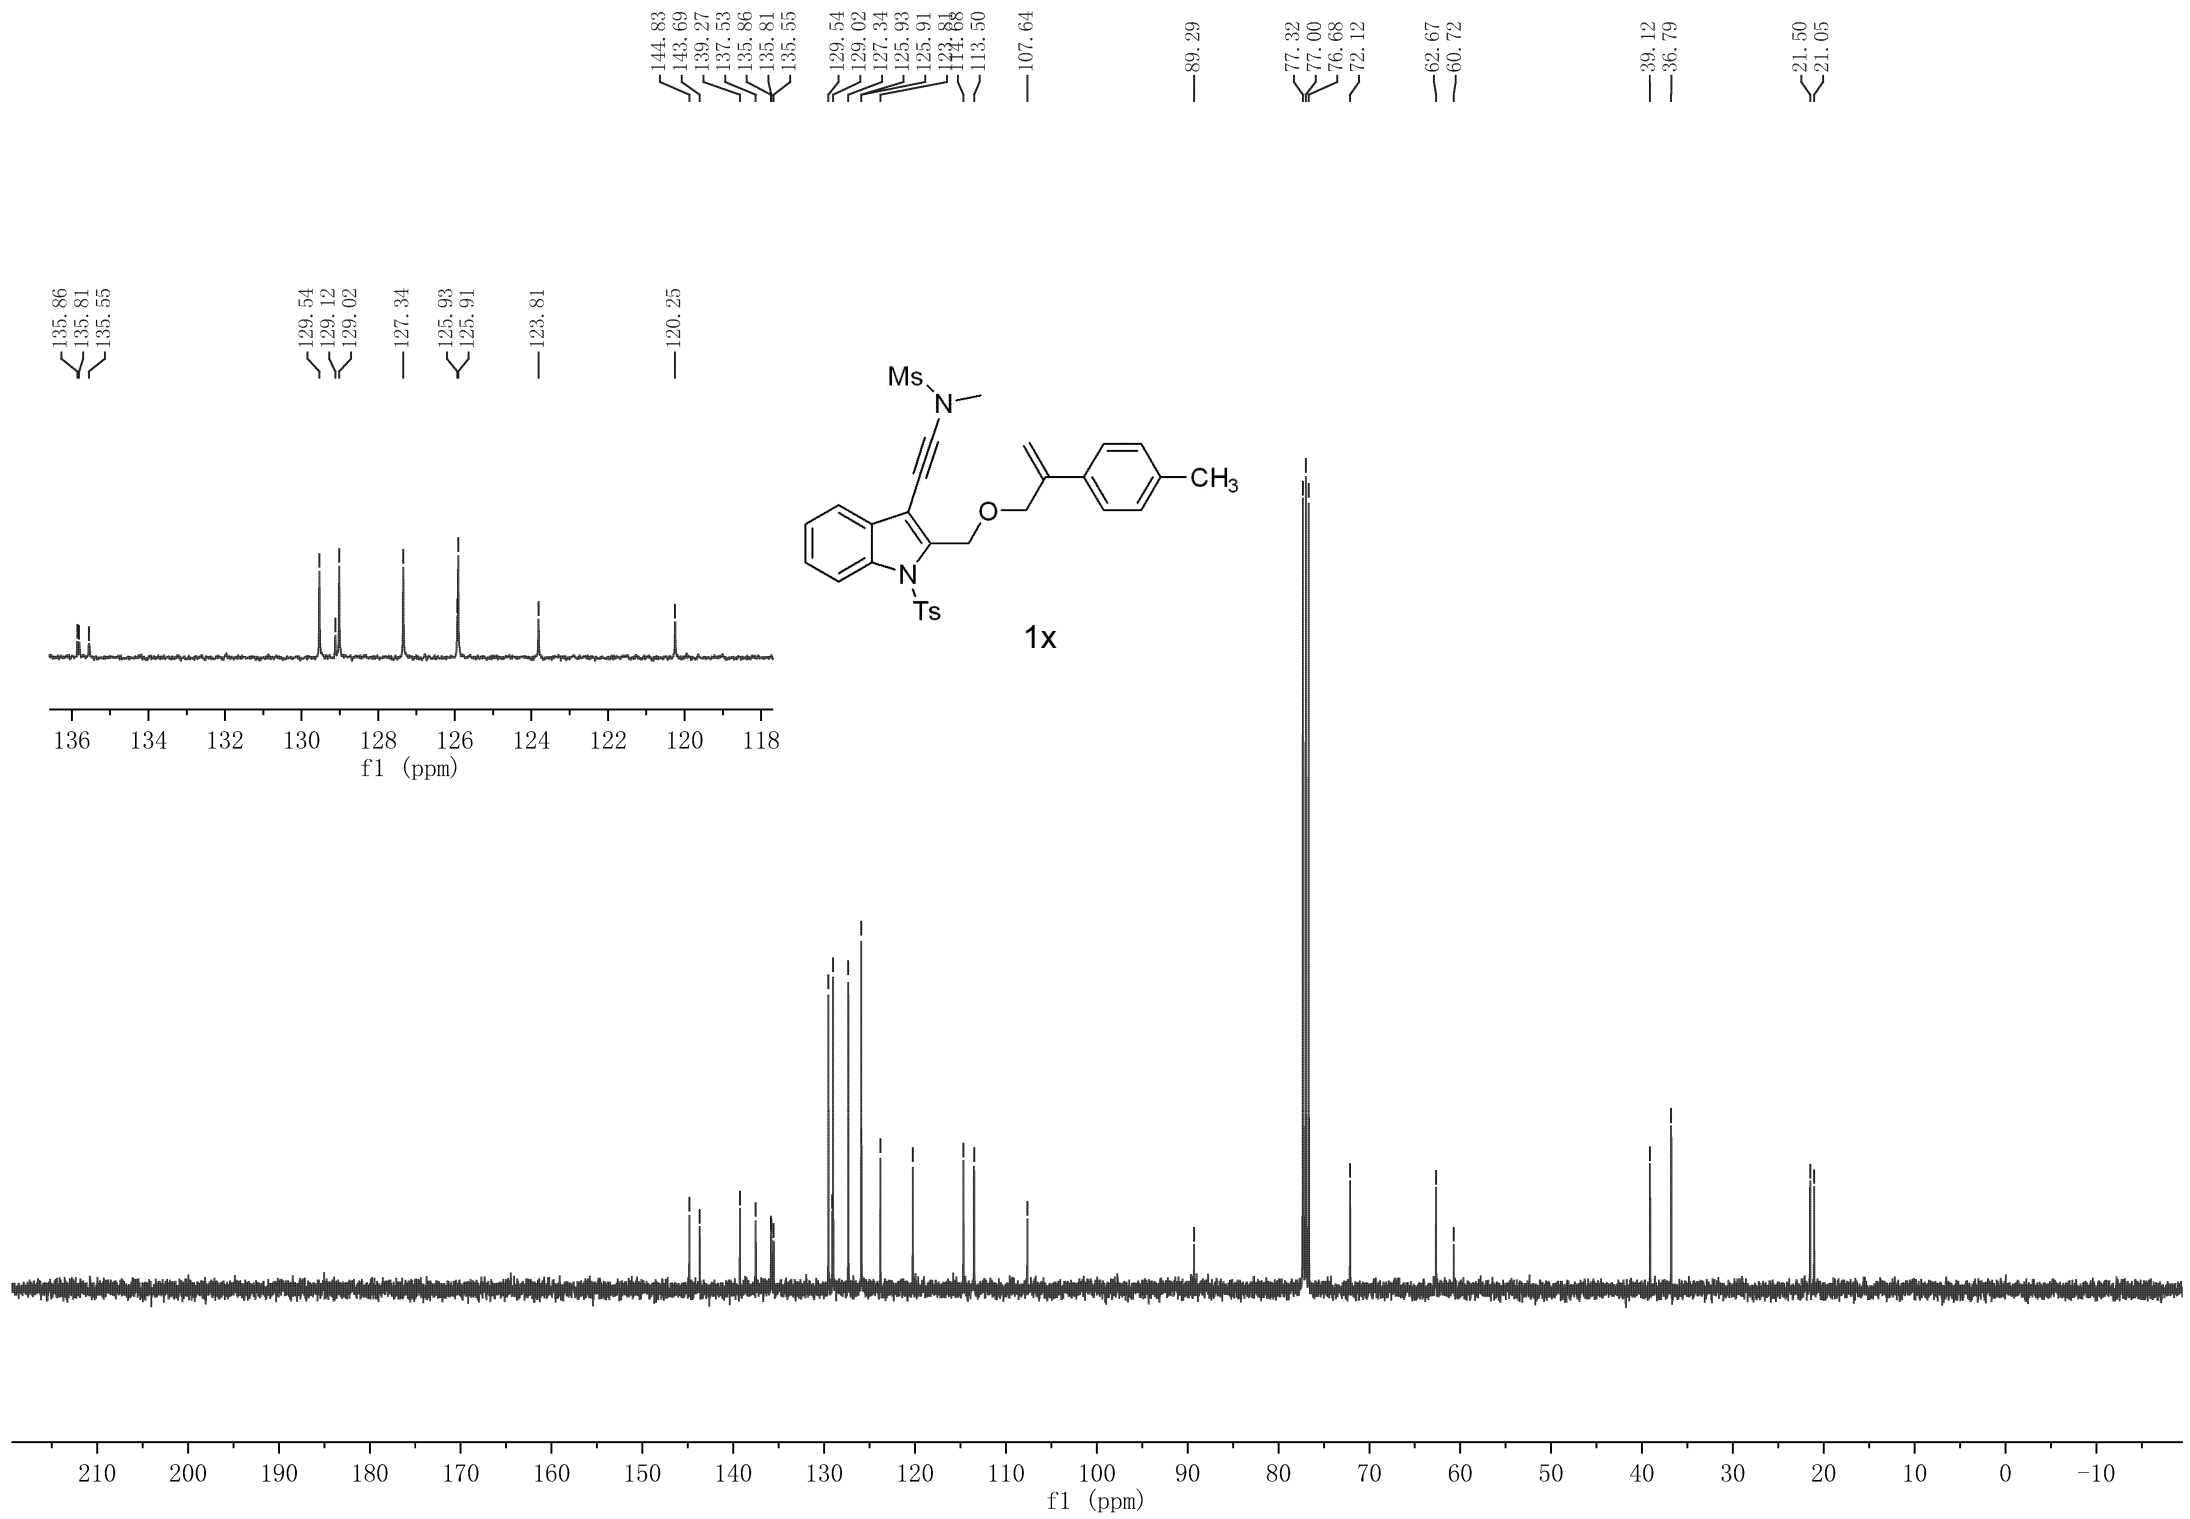

8.084  
8.069  
7.844  
7.830  
7.575  
7.561  
7.418  
7.404  
7.345  
7.330  
7.279  
7.264  
7.242  
7.226  
7.080  
7.066

5.550  
5.412

5.055

4.431

3.254  
3.058

2.284

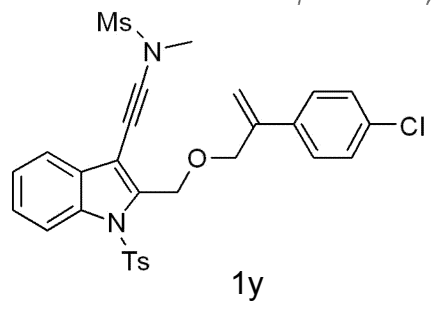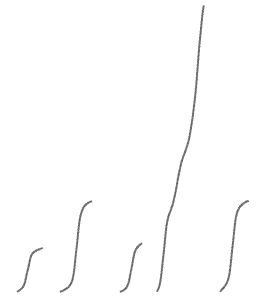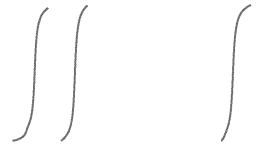

0.99  
2.05  
1.09  
6.49  
2.06

0.96  
1.00

2.07

1.96

3.01  
3.06

3.08

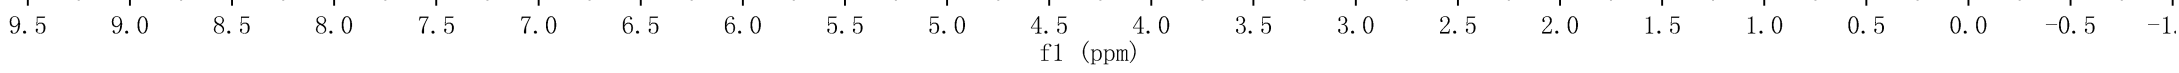

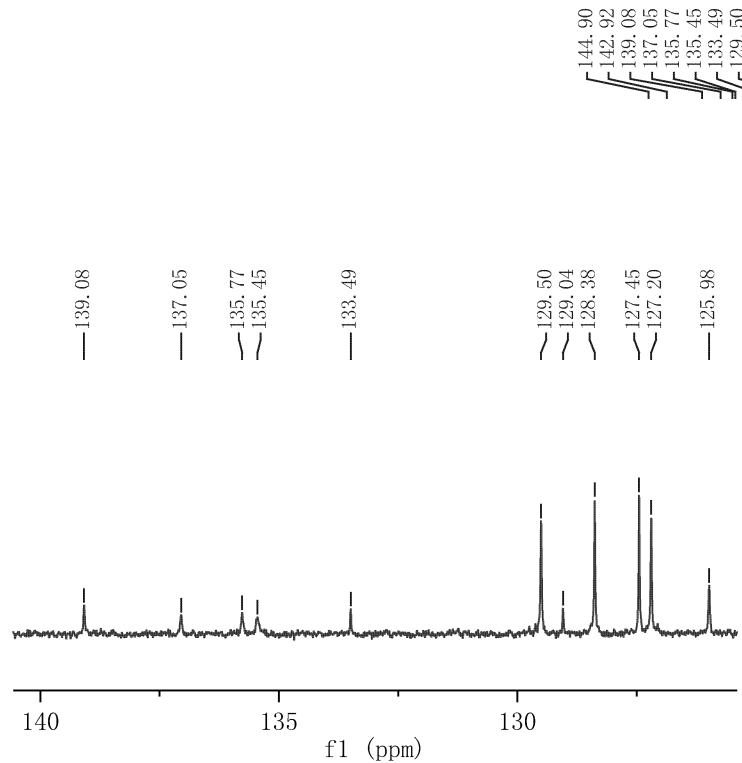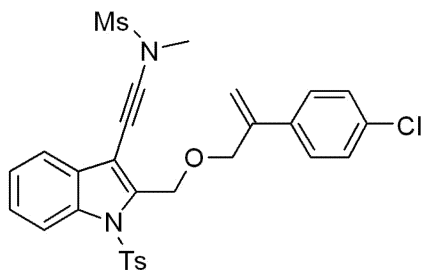

1y

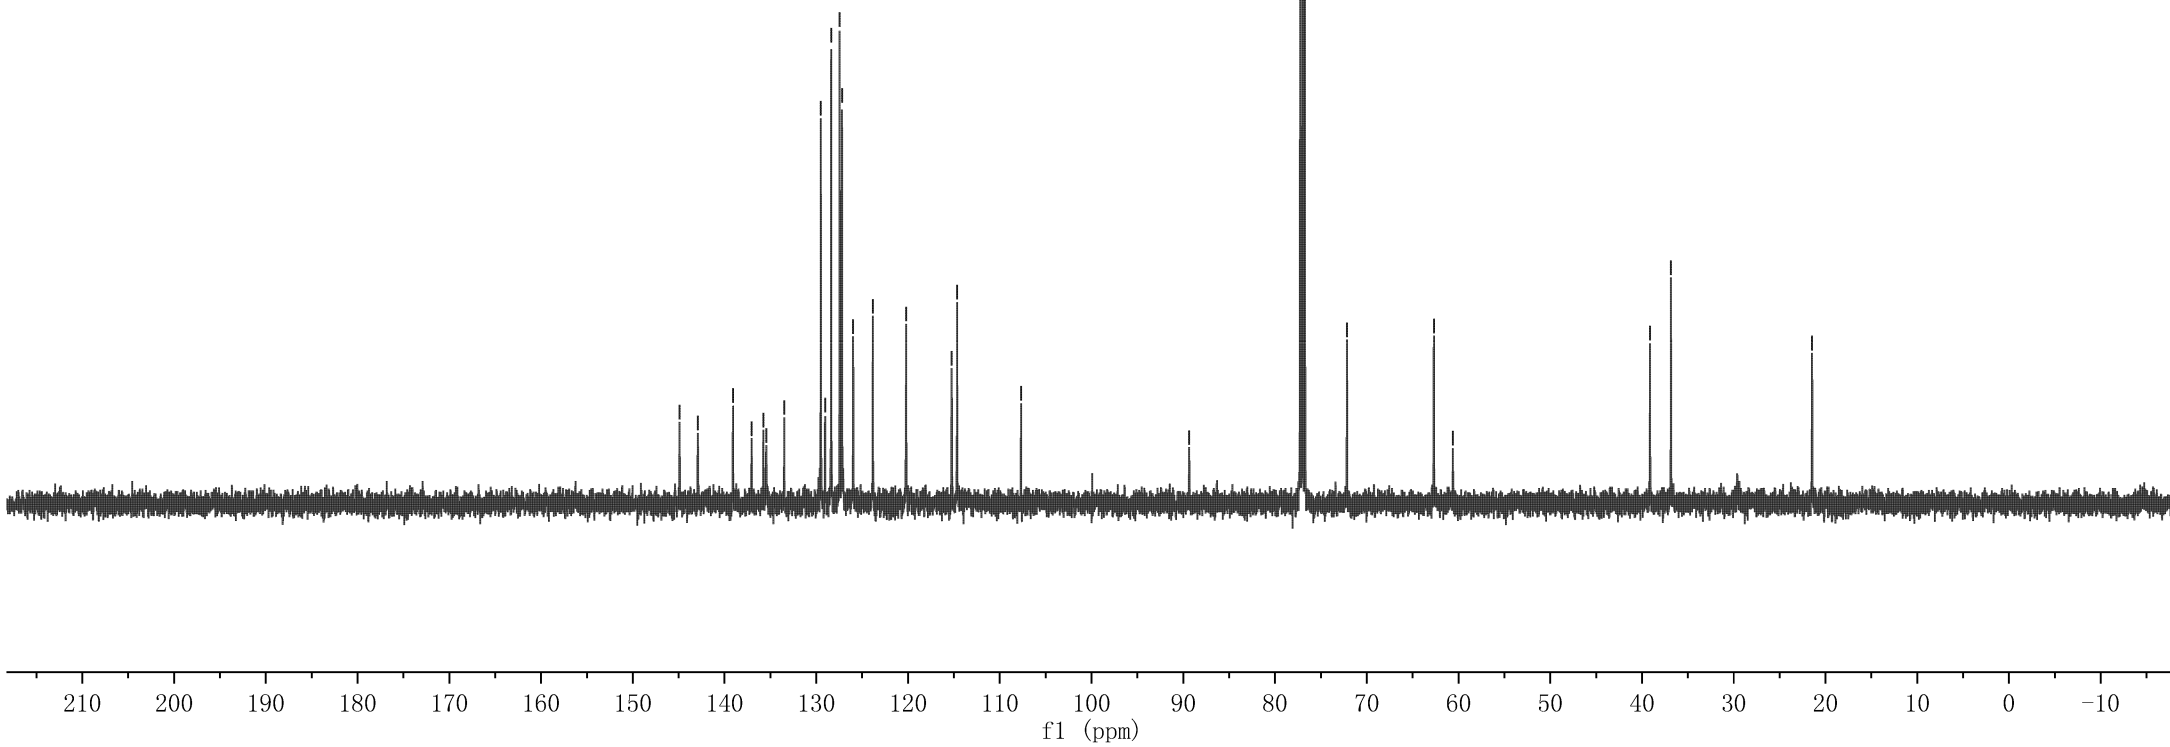

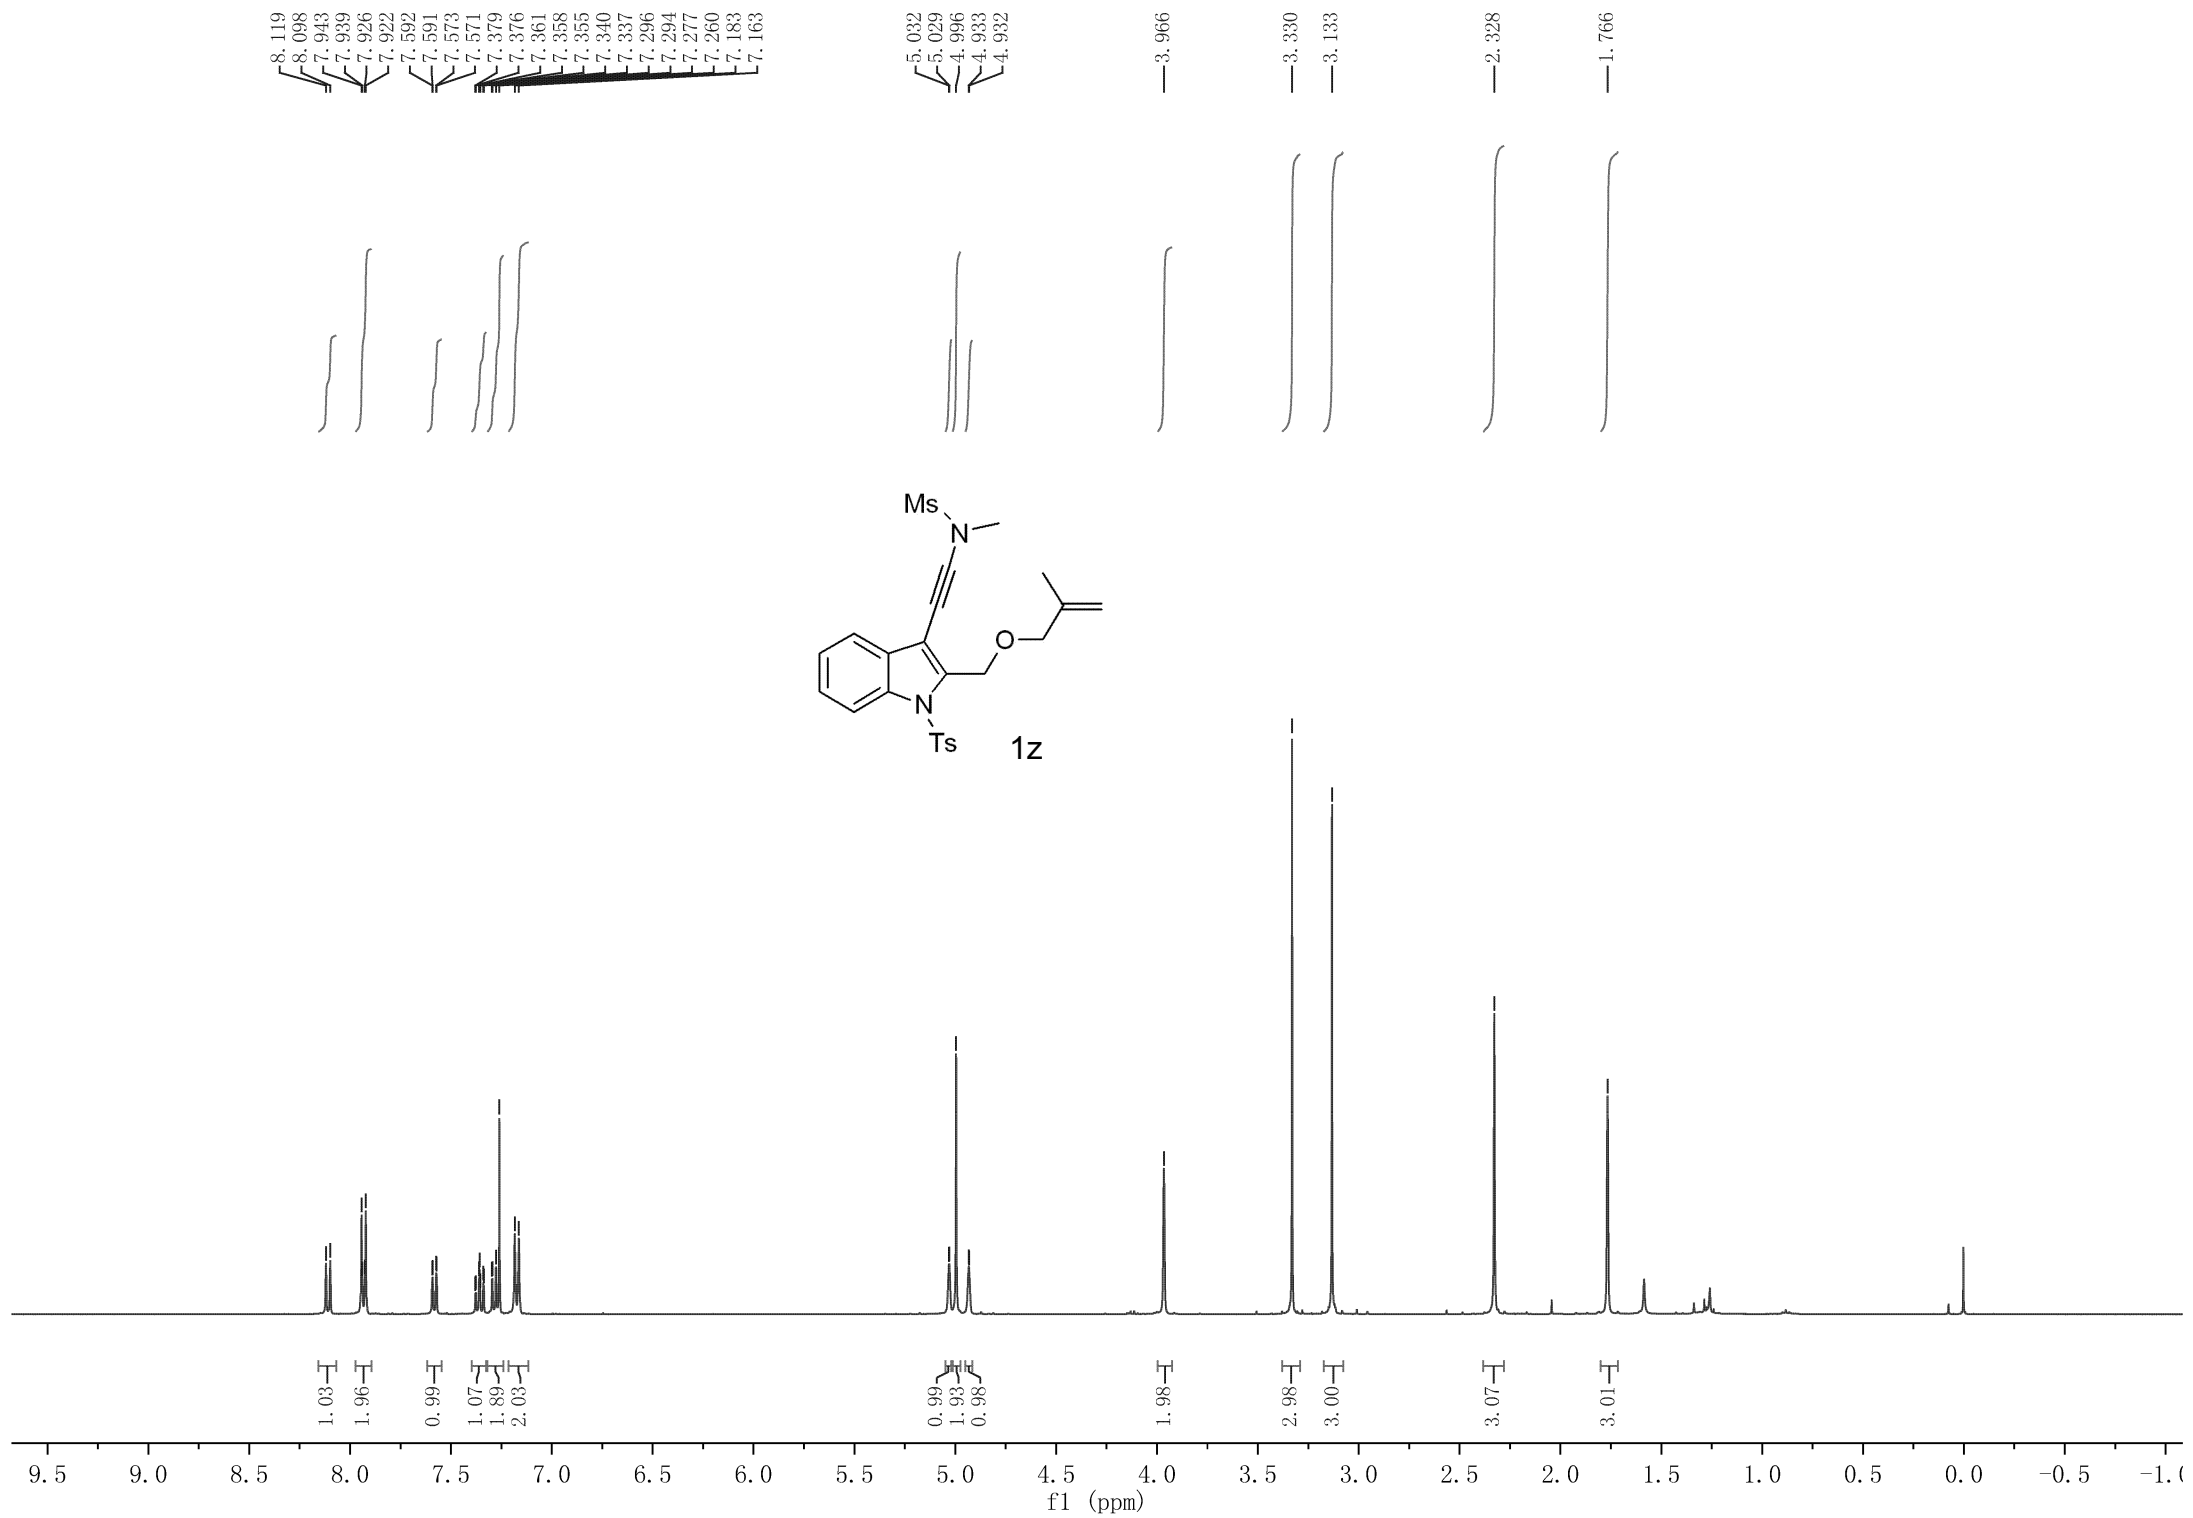

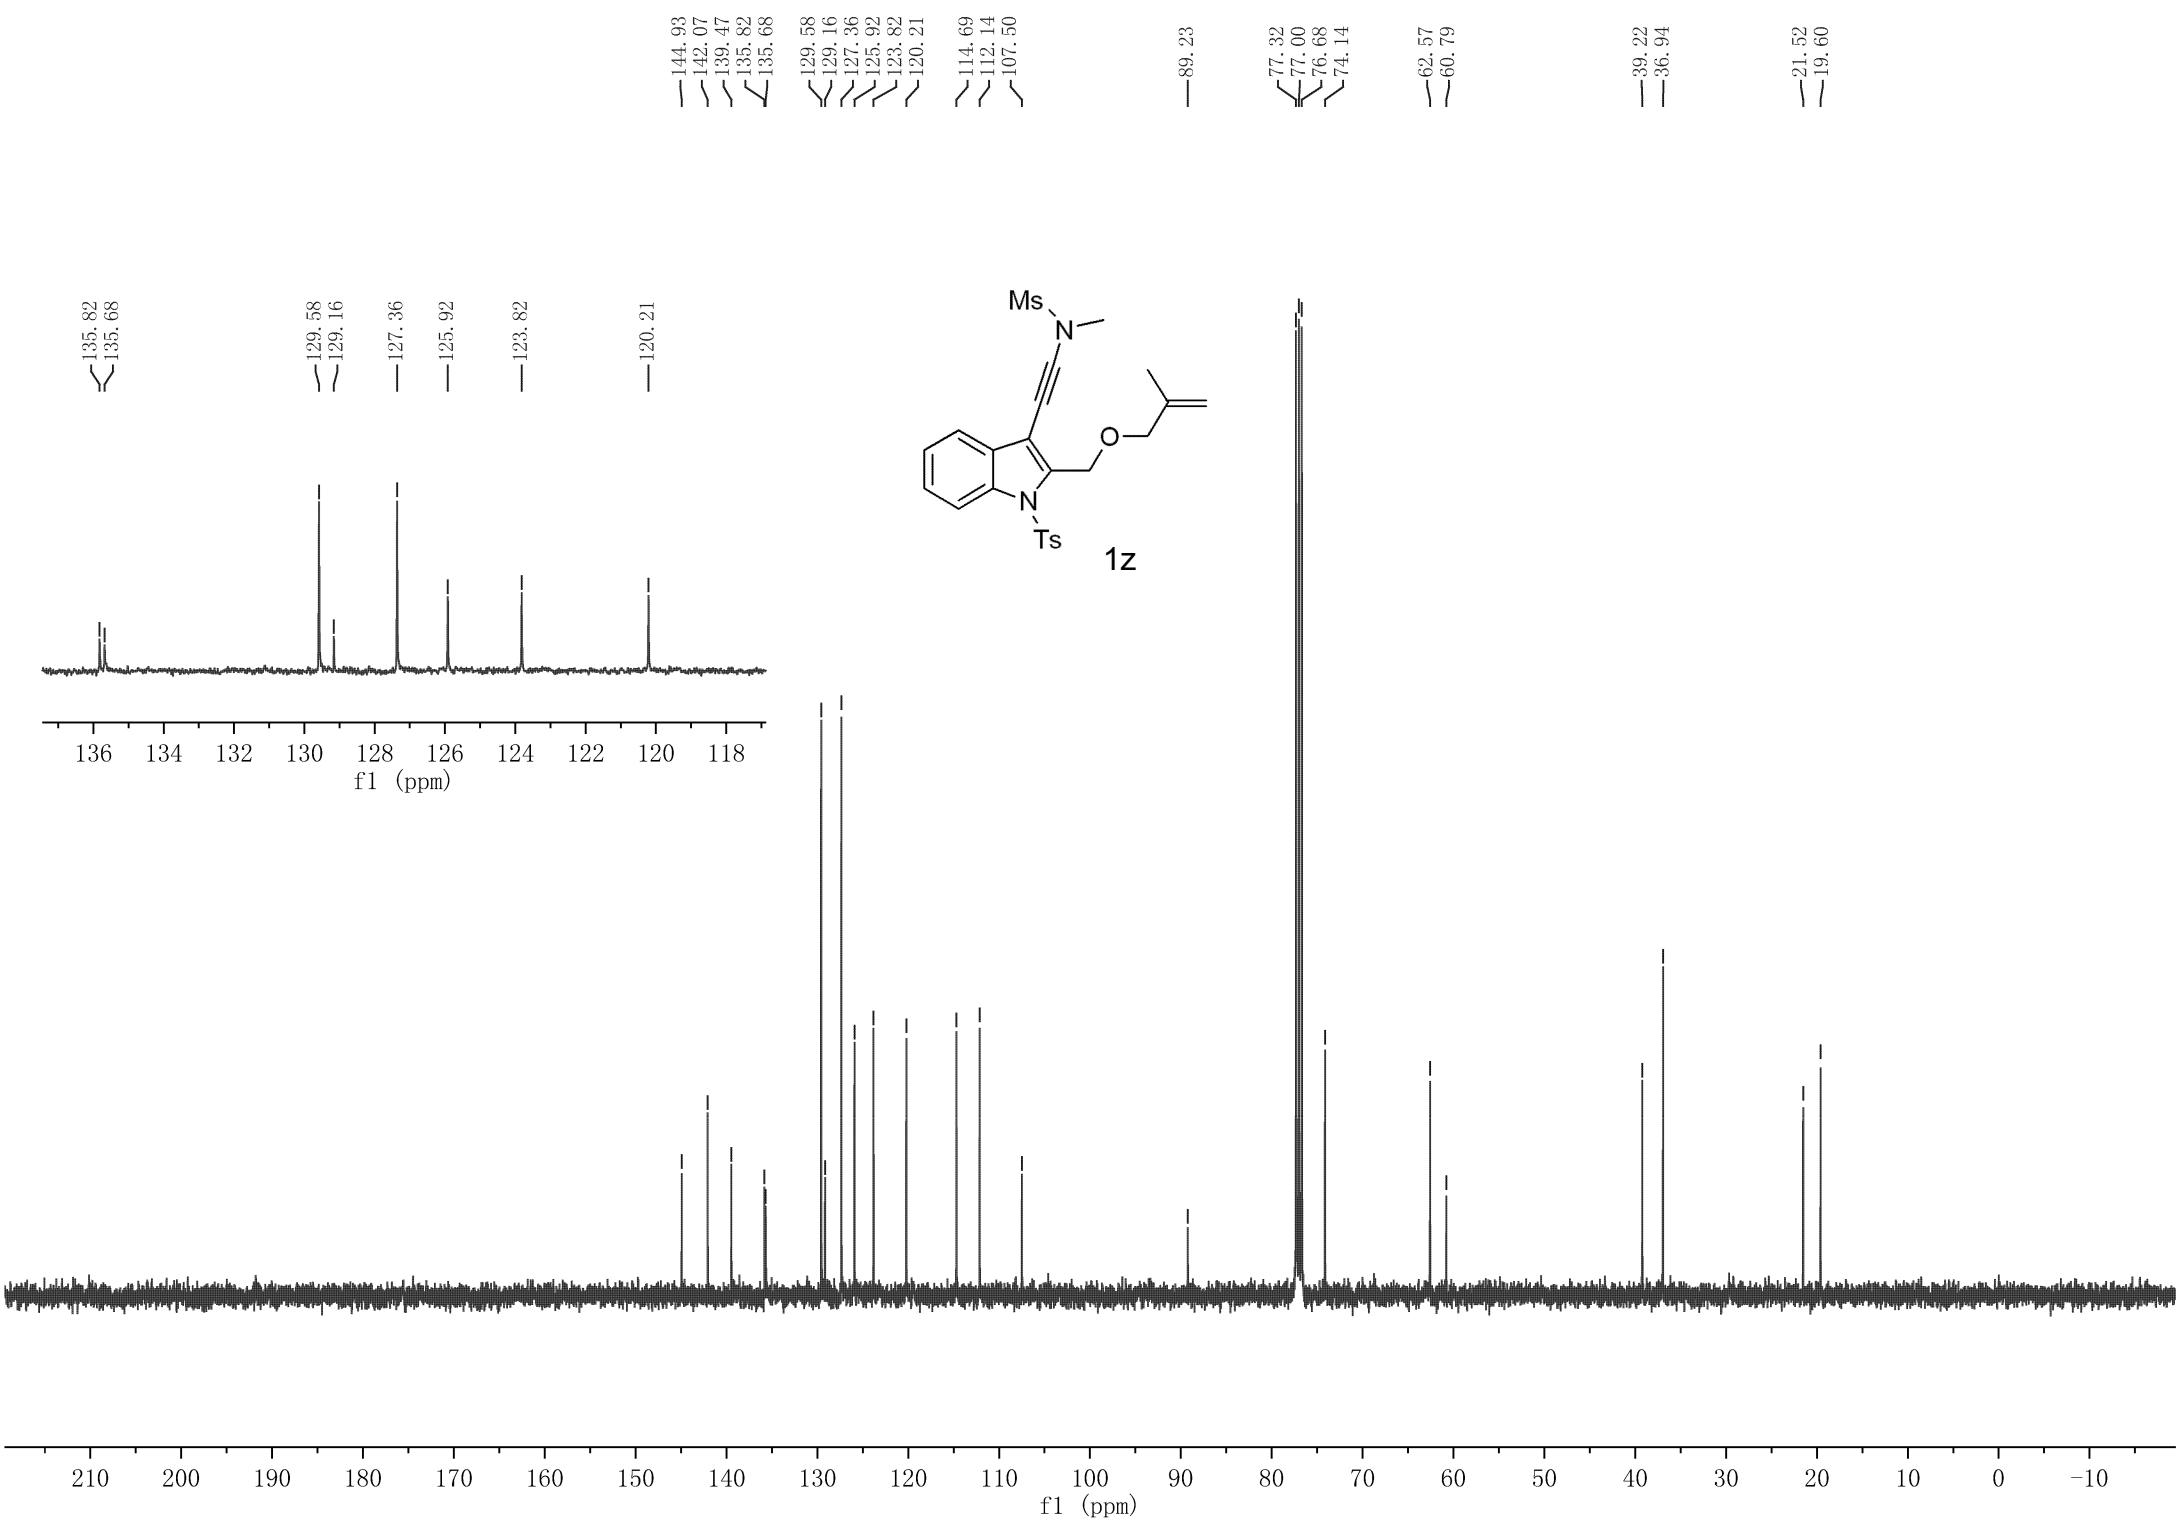

7.616  
7.614  
7.612  
7.598  
7.595  
7.488  
7.471  
7.469  
7.356  
7.353  
7.338  
7.334  
7.318  
7.314  
7.305  
7.302  
7.286  
7.283  
7.268  
7.265  
7.260  
5.986  
5.960  
5.957  
5.946  
5.943  
5.931  
5.929  
5.917  
5.372  
5.368  
5.329  
5.325  
5.248  
5.244  
3.768  
4.116  
4.112  
4.109  
4.102  
4.098  
4.095  
3.346  
3.156

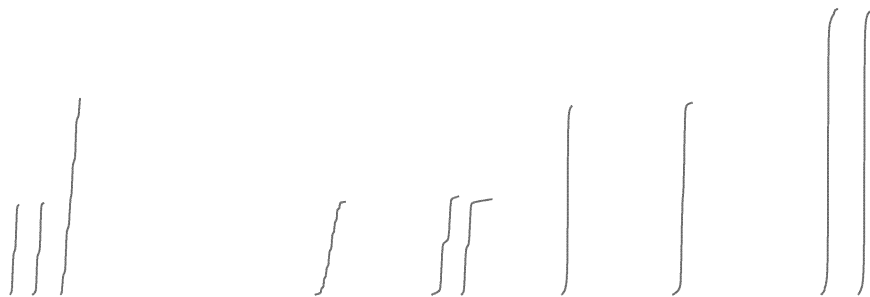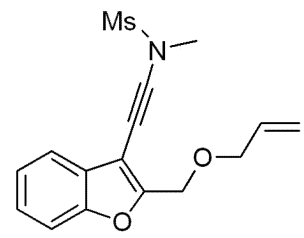

3a

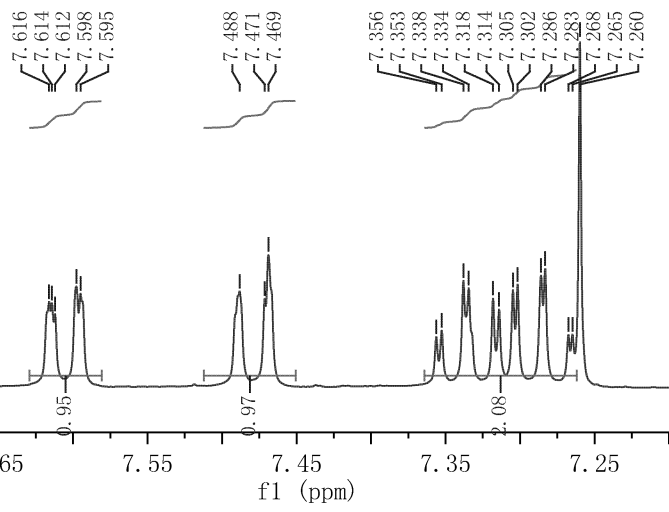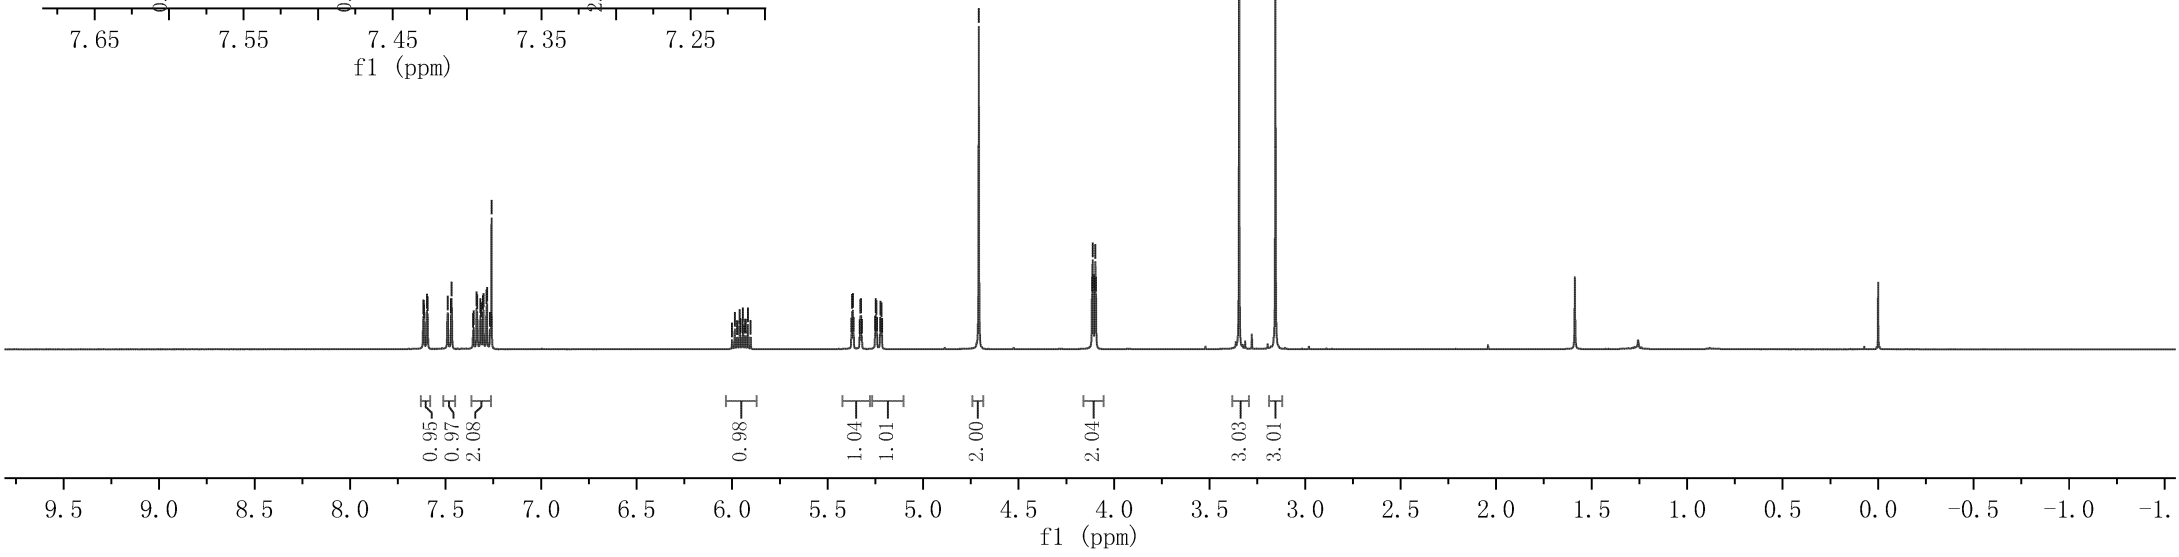

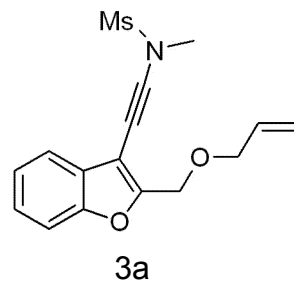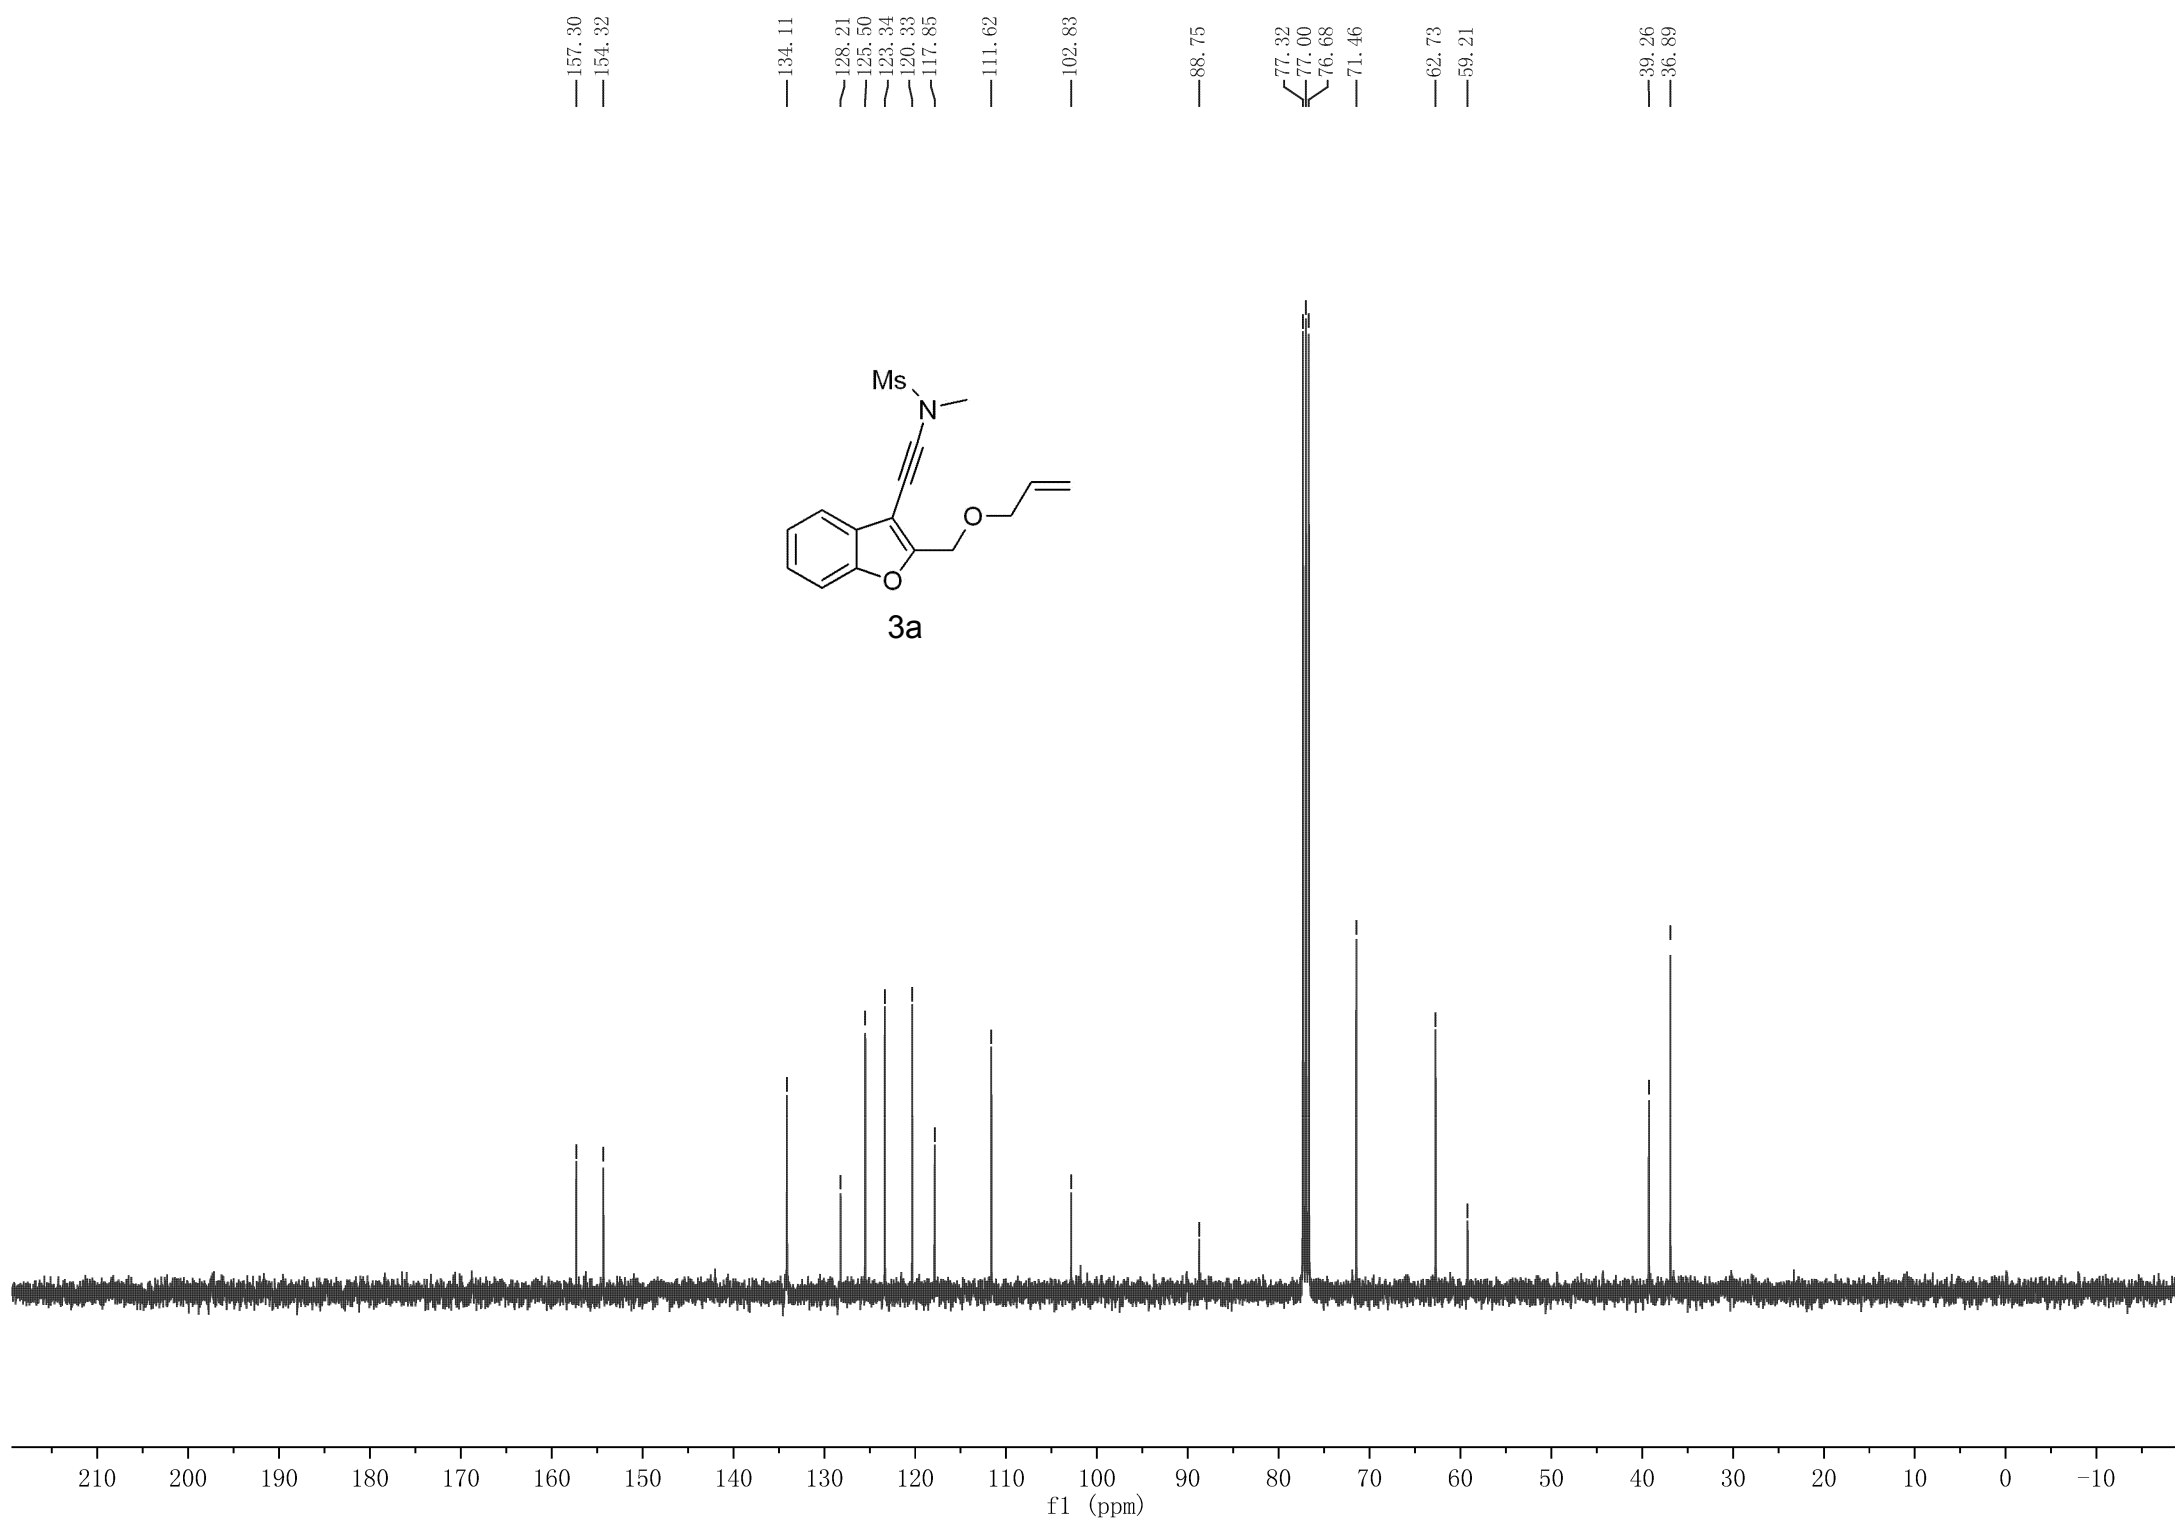

7.827  
7.806  
7.265  
7.260  
7.251  
7.241  
6.269  
6.261  
5.813  
5.787  
5.770  
5.758  
5.744  
5.222  
5.218  
5.175  
5.146  
5.142  
5.120  
3.850  
3.846  
3.843  
3.836  
3.832  
3.829  
3.237  
3.063  
2.389

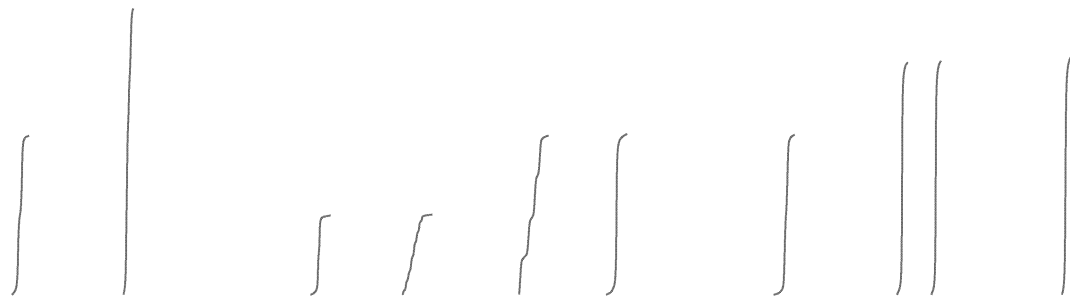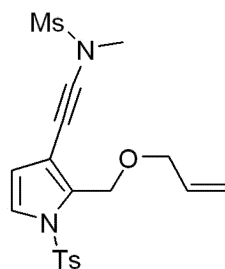

3b

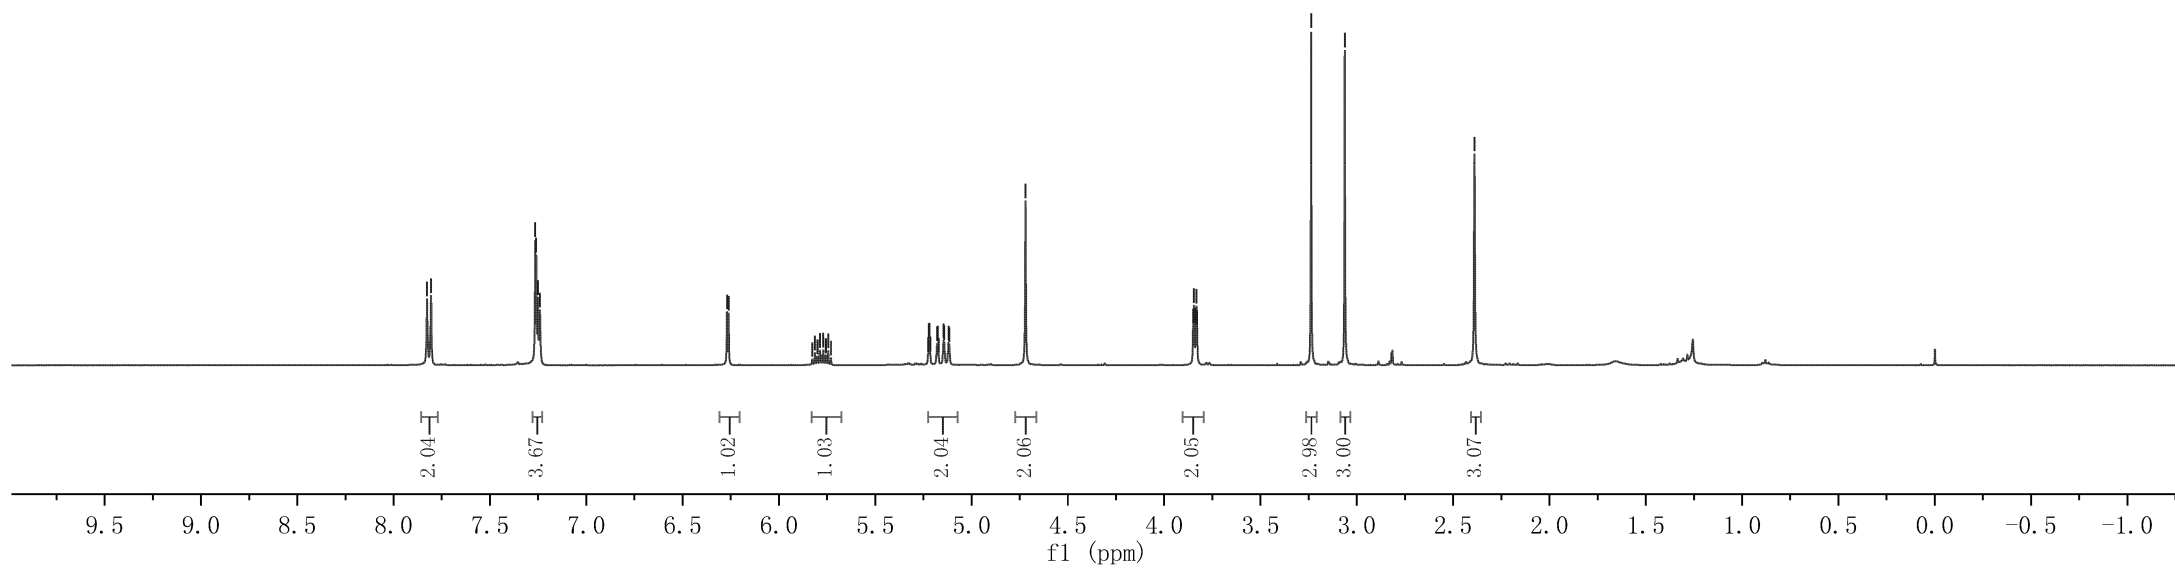



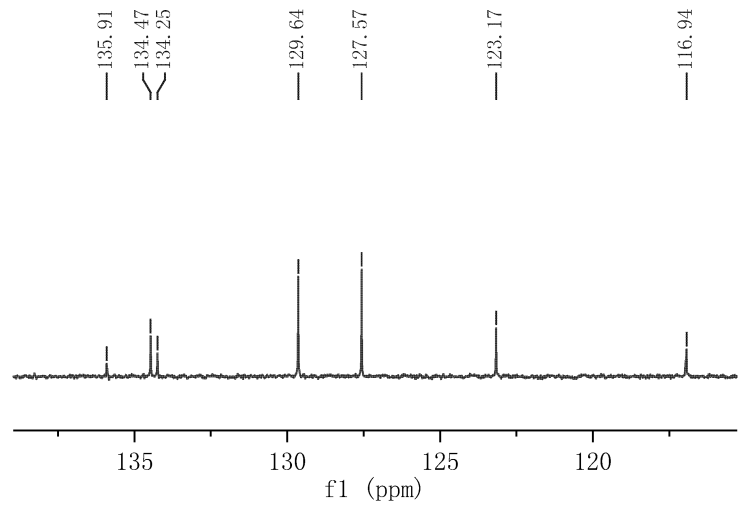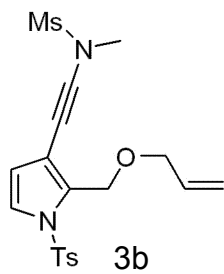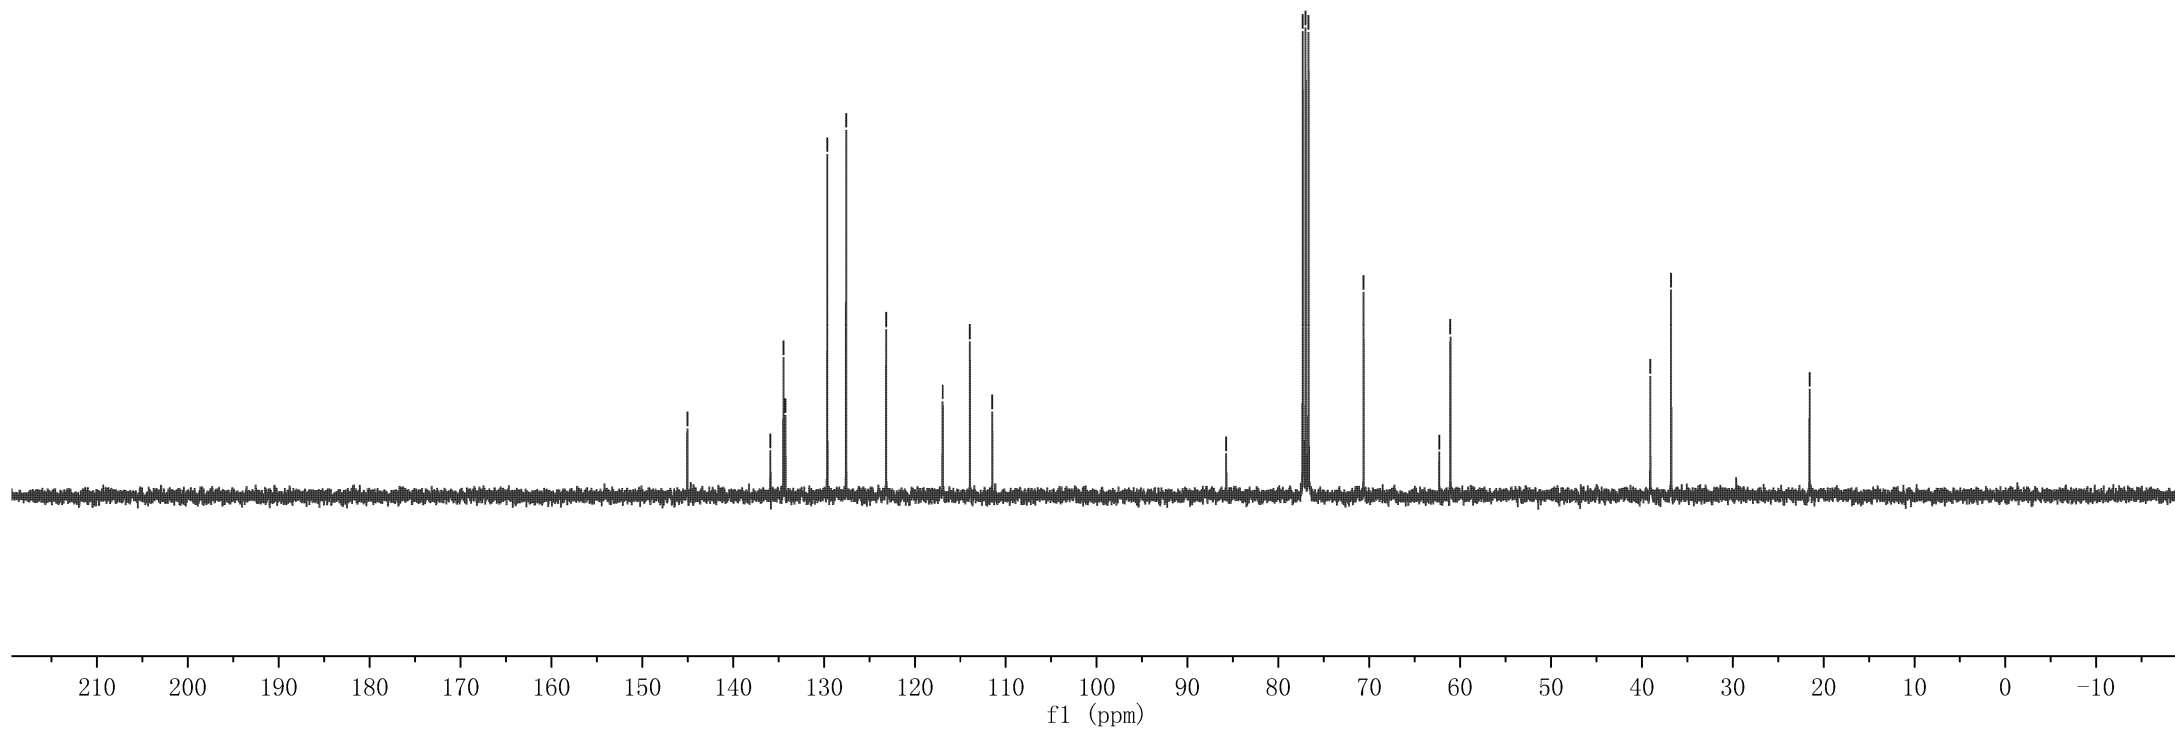

— 7.260  
 — 6.966  
 — 6.879  
 — 6.005  
 — 5.994  
 — 5.984  
 — 5.973  
 — 5.960  
 — 5.950  
 — 5.939  
 — 5.928  
 — 5.333  
 — 5.330  
 — 5.298  
 — 5.295  
 — 5.208  
 — 5.206  
 — 5.188  
 — 5.185  
 — 4.593  
 — 4.064  
 — 4.055  
 — 4.053  
 — 3.895  
 — 3.861  
 — 3.294  
 — 3.117

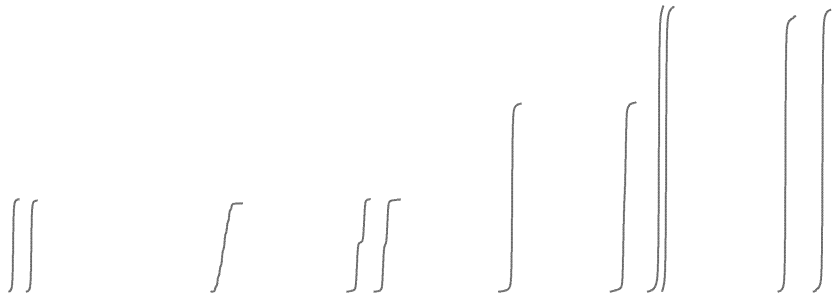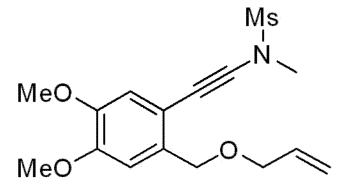

3c

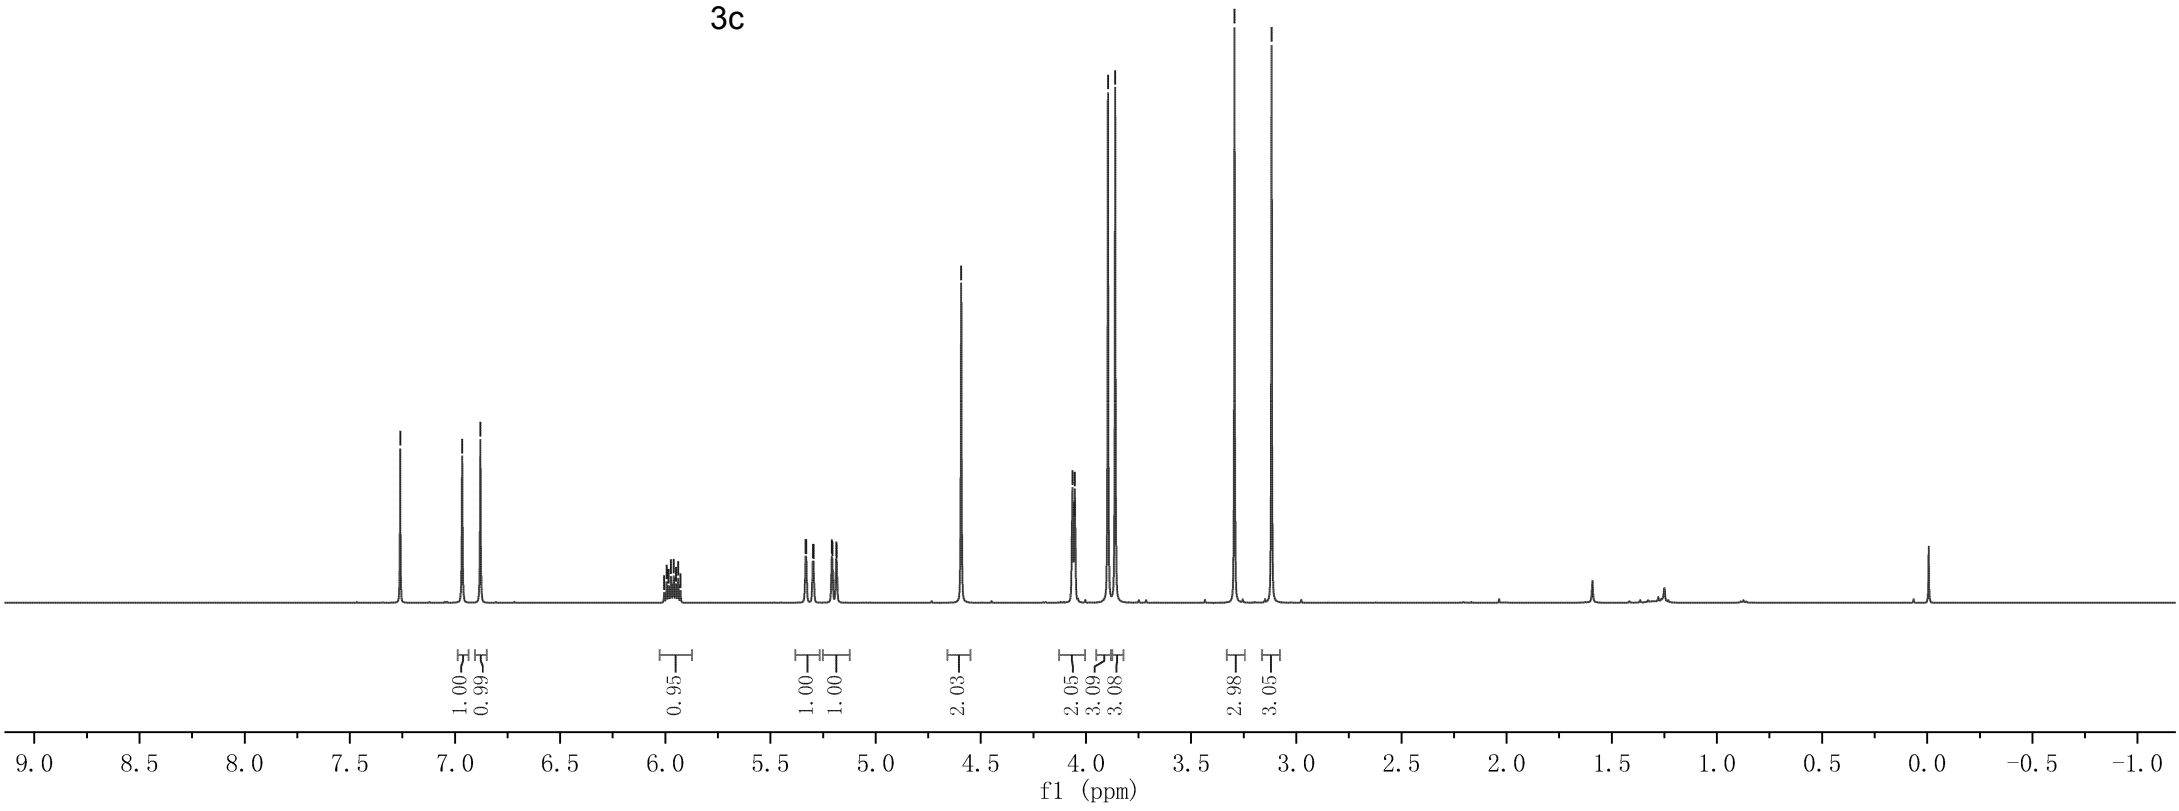

149.42  
147.97

134.81  
133.55

117.05  
114.39  
113.07  
111.08

85.69

77.25  
77.00  
76.75  
71.32  
70.11  
67.30

56.01  
55.90

39.19  
36.73

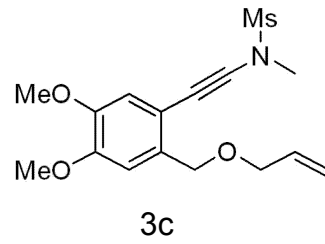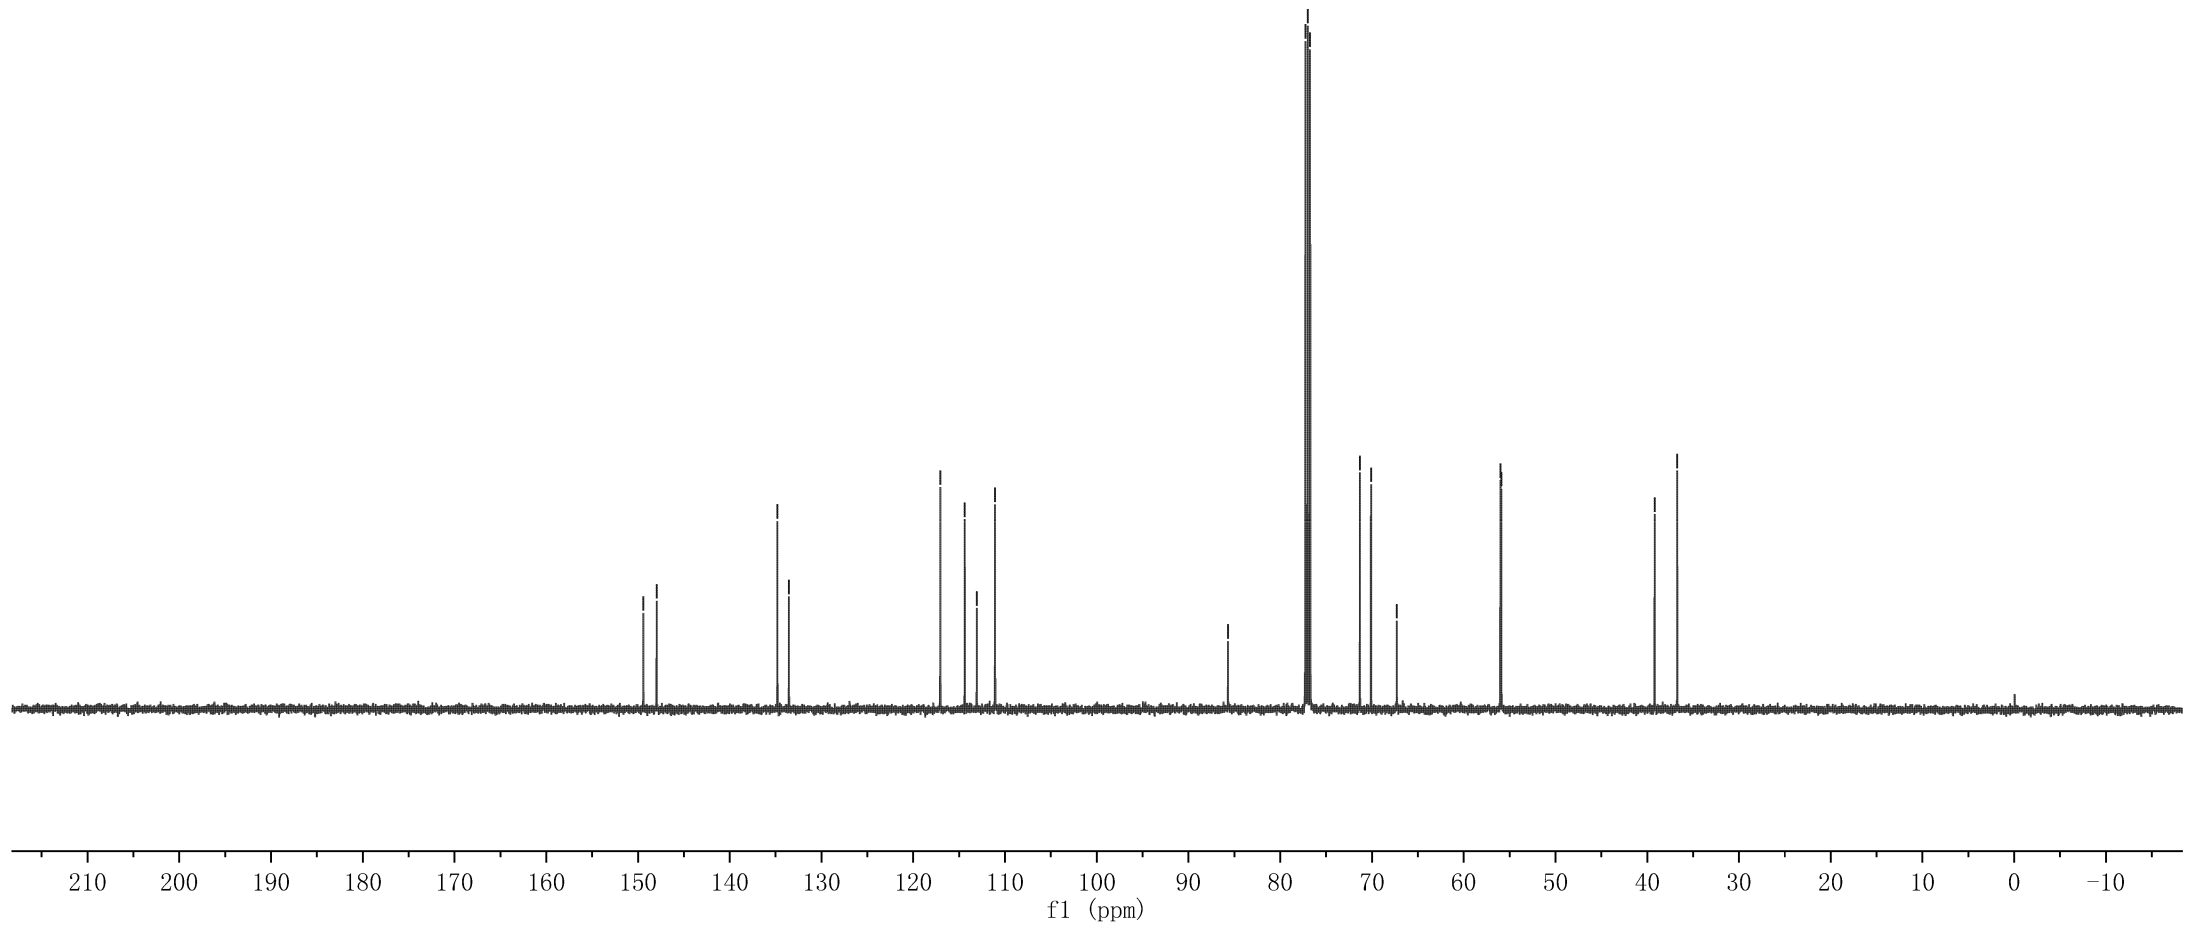

8.138  
8.117  
7.942  
7.921  
7.594  
7.593  
7.575  
7.573  
7.359  
7.356  
7.292  
7.290  
7.272  
7.260  
7.178  
7.158  
5.755  
5.739  
5.720  
5.717  
5.714  
5.704  
5.701  
5.698  
5.599  
5.595  
5.579  
5.561  
4.985

3.992  
3.976

3.327  
3.131

2.320

1.729  
1.726  
1.713  
1.710

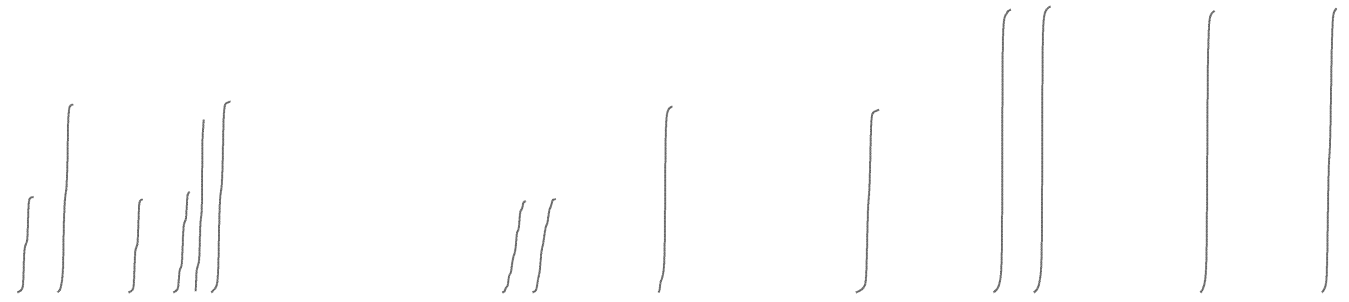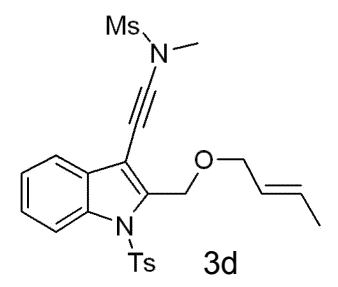

1.02  
2.00  
0.99  
1.07  
1.84  
2.03

0.97  
0.99  
1.98

1.95

3.01  
3.05

3.00

3.02

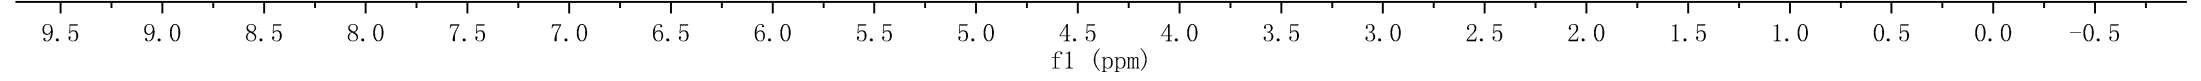

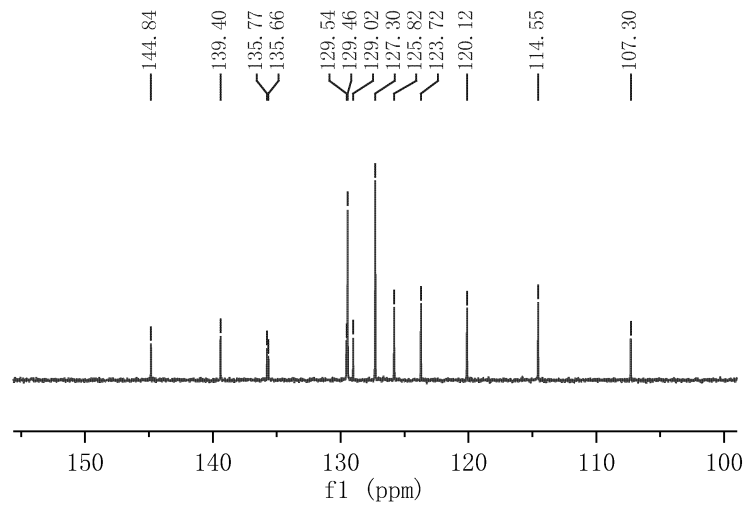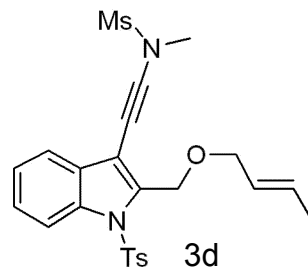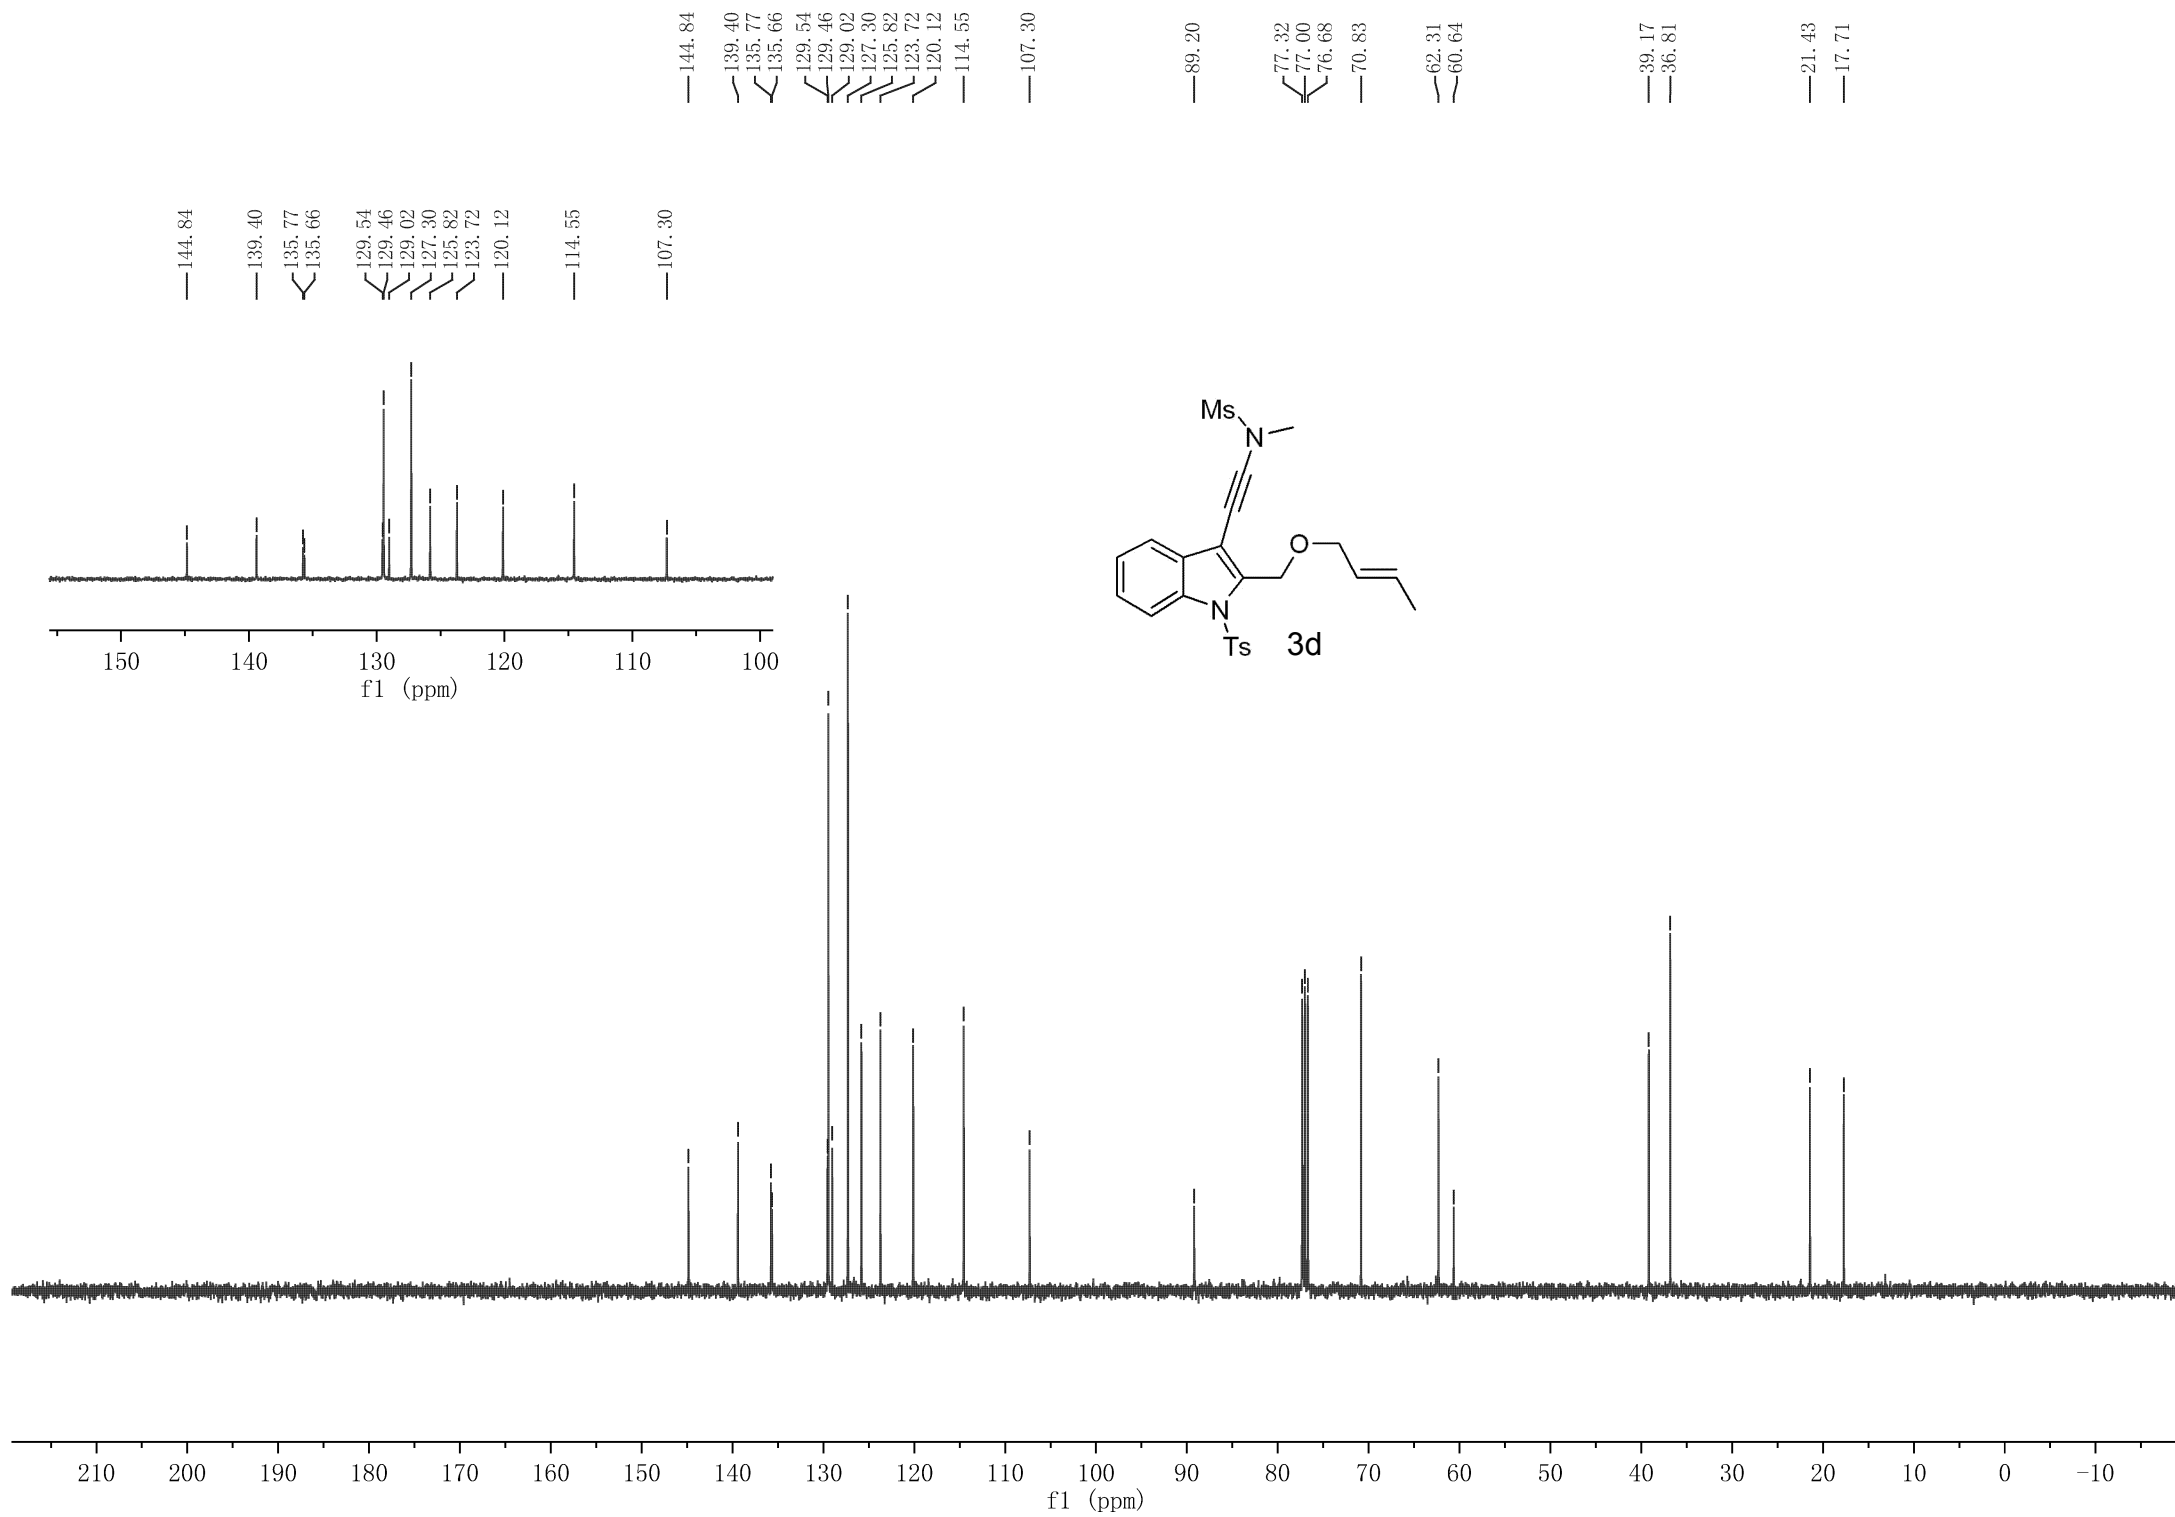

129.59  
129.42  
127.30  
127.23  
125.79  
123.67  
120.07  
114.54

70.83

62.29

39.14

36.80

21.44

17.71

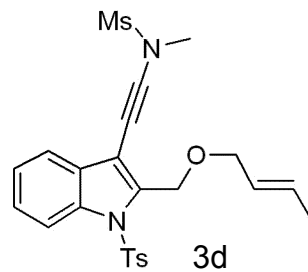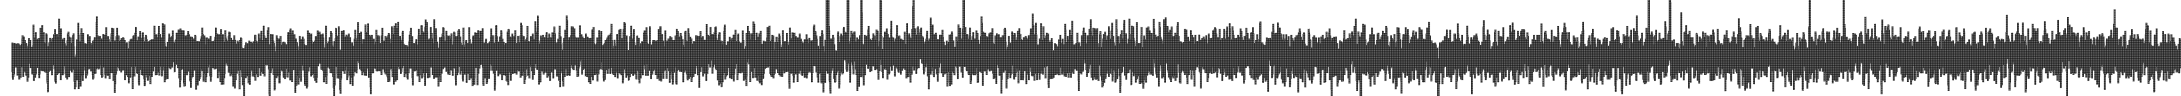

210 200 190 180 170 160 150 140 130 120 110 100 90 80 70 60 50 40 30 20 10 0 -10

f1 (ppm)

8.144  
8.128  
7.630  
7.614  
7.581  
7.566  
7.386  
7.371  
7.355  
7.311  
7.296  
7.282  
7.260  
7.197  
7.181

5.794  
5.781  
5.773  
5.768  
5.760  
5.747  
5.739  
5.734  
5.727  
5.714  
5.153  
5.119  
5.076  
5.056  
4.981

3.908  
3.895

3.347  
3.157  
2.963

2.328

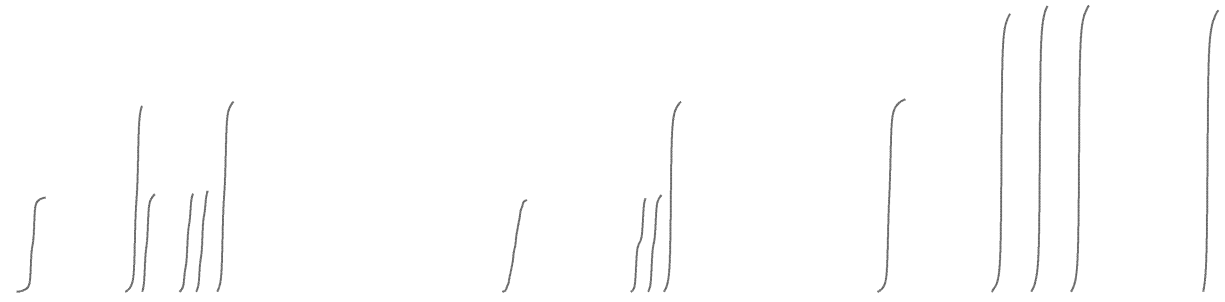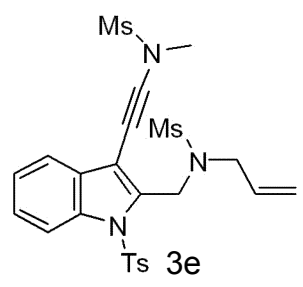

1.02  
2.01  
1.05  
1.06  
1.09  
2.05

0.99

1.01  
1.04  
2.05

2.08

3.00  
3.08  
3.09

3.04

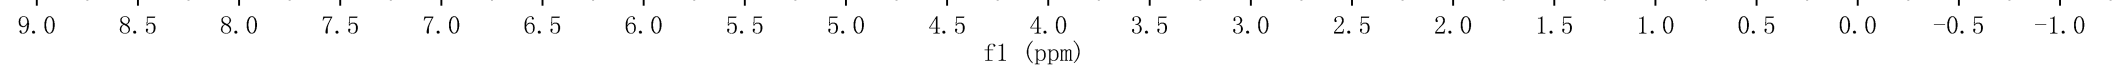

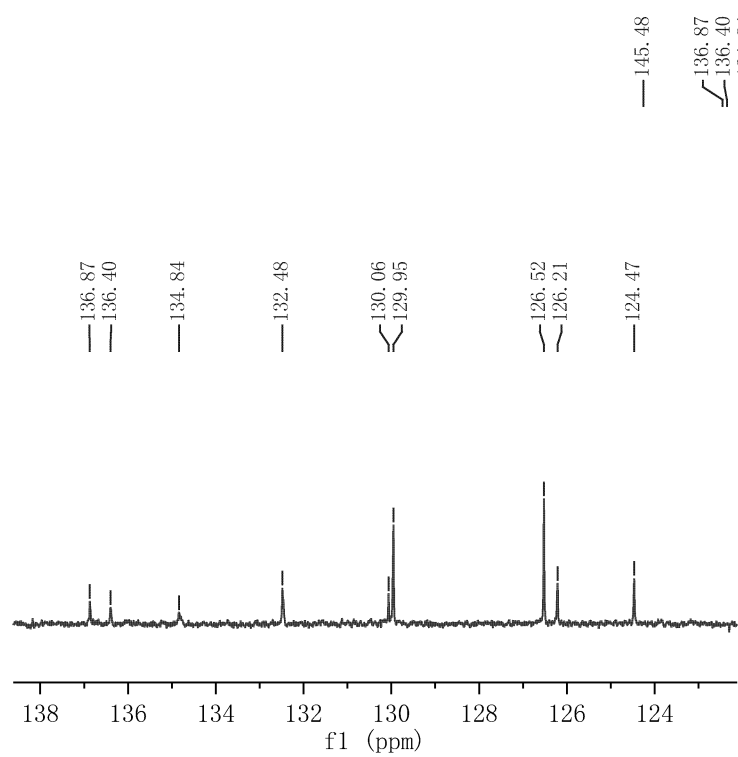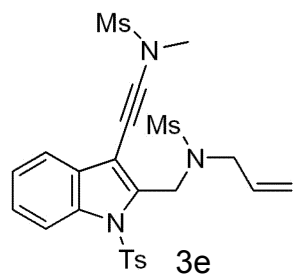

- 145.48
- 136.87
- 136.40
- 134.84
- 132.48
- 130.06
- 129.95
- 126.52
- 126.21
- 124.47
- 120.26
- 118.92
- 115.15
- 109.19
- 91.04
- 77.25
- 77.00
- 76.75
- 60.16
- 50.30
- 43.96
- 39.92
- 39.15
- 37.22
- 21.52

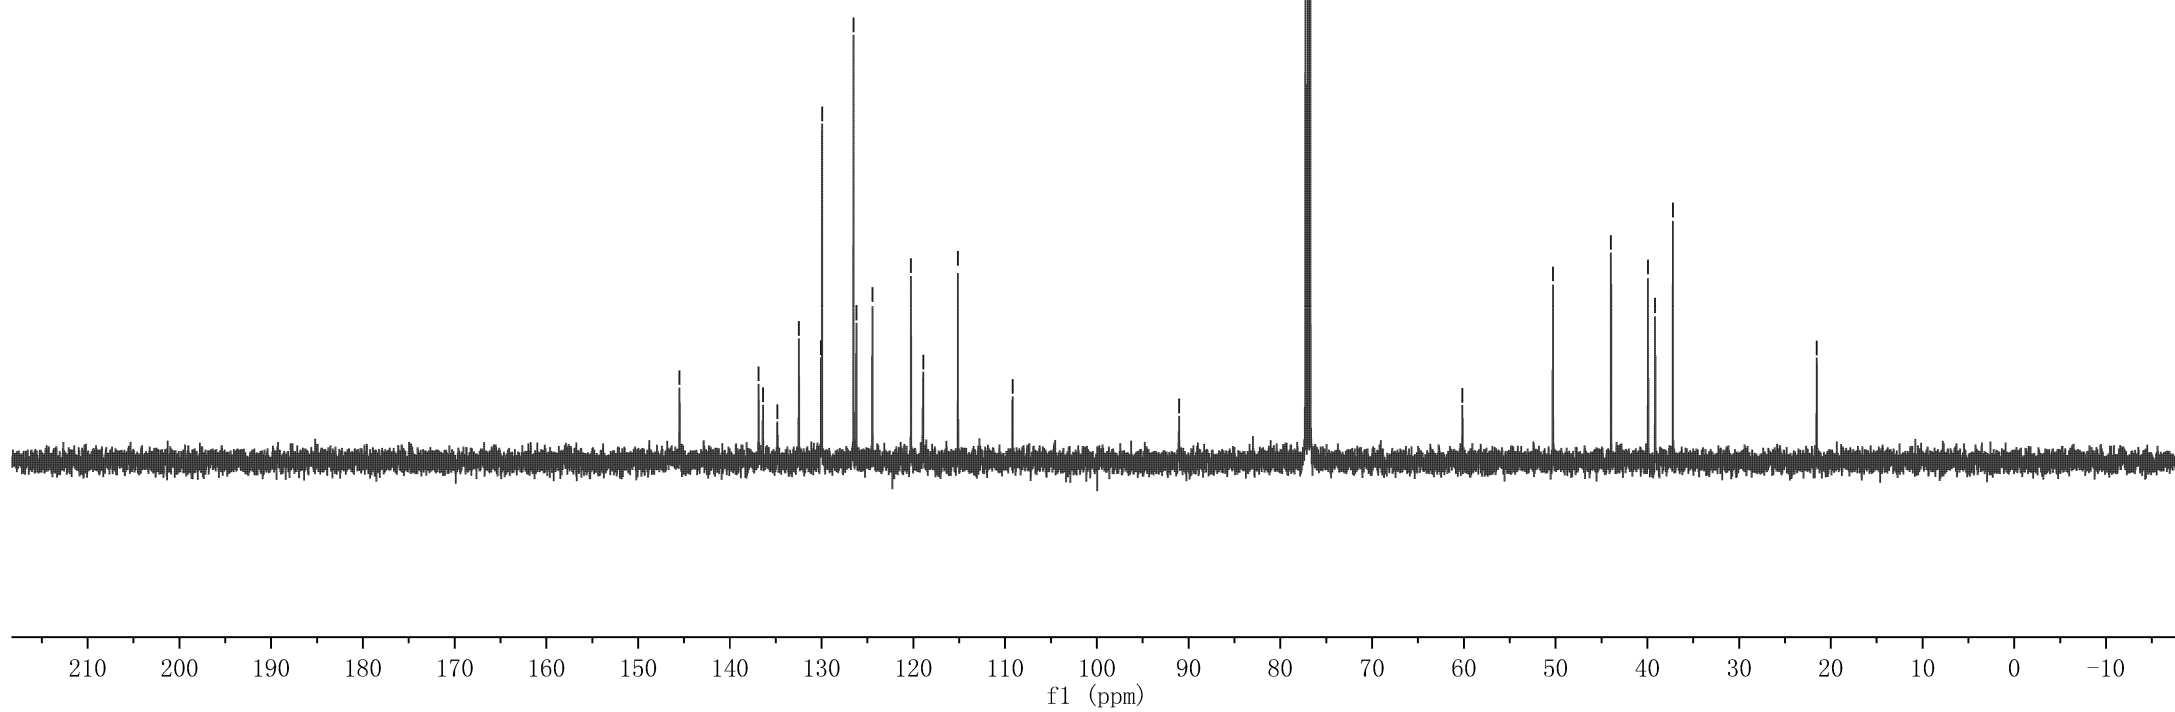



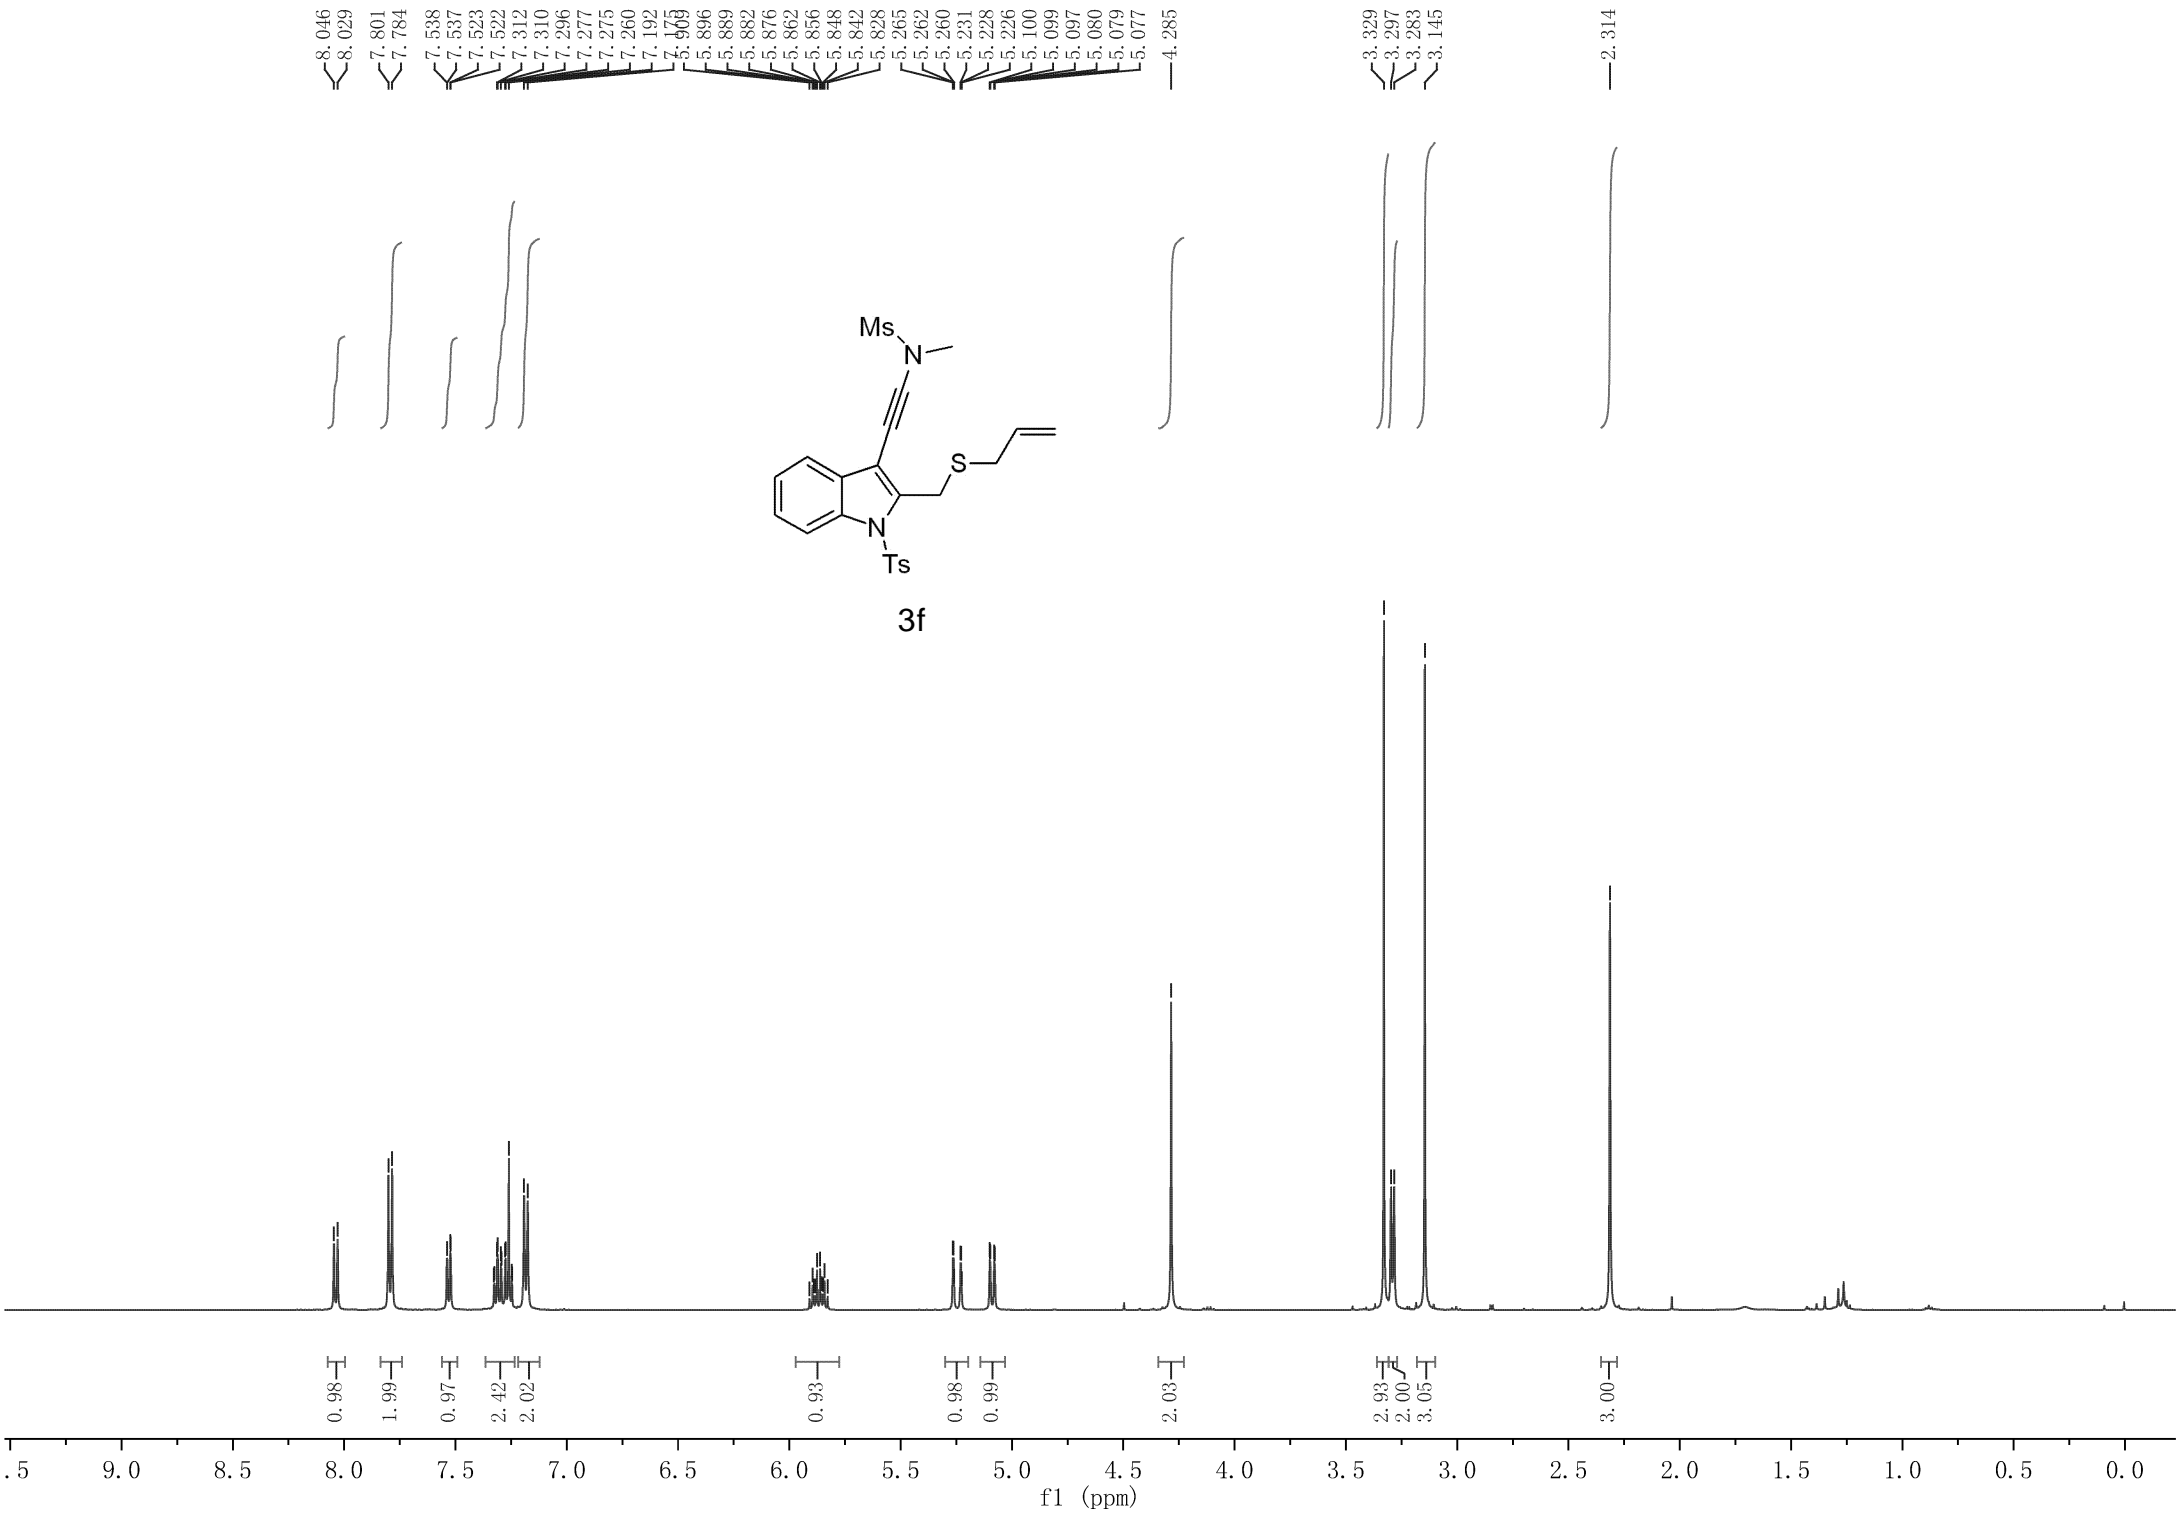

145.13  
141.67  
135.79  
135.43  
134.20  
129.70  
129.43  
126.83  
125.43  
123.98  
119.72  
117.02  
114.72  
105.55  
89.61  
77.25  
77.00  
76.74  
60.80  
39.15  
36.95  
35.28  
27.69  
21.41

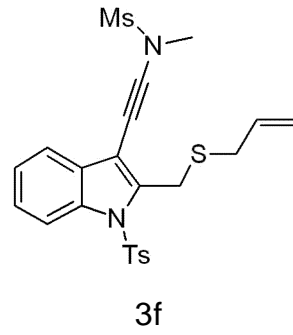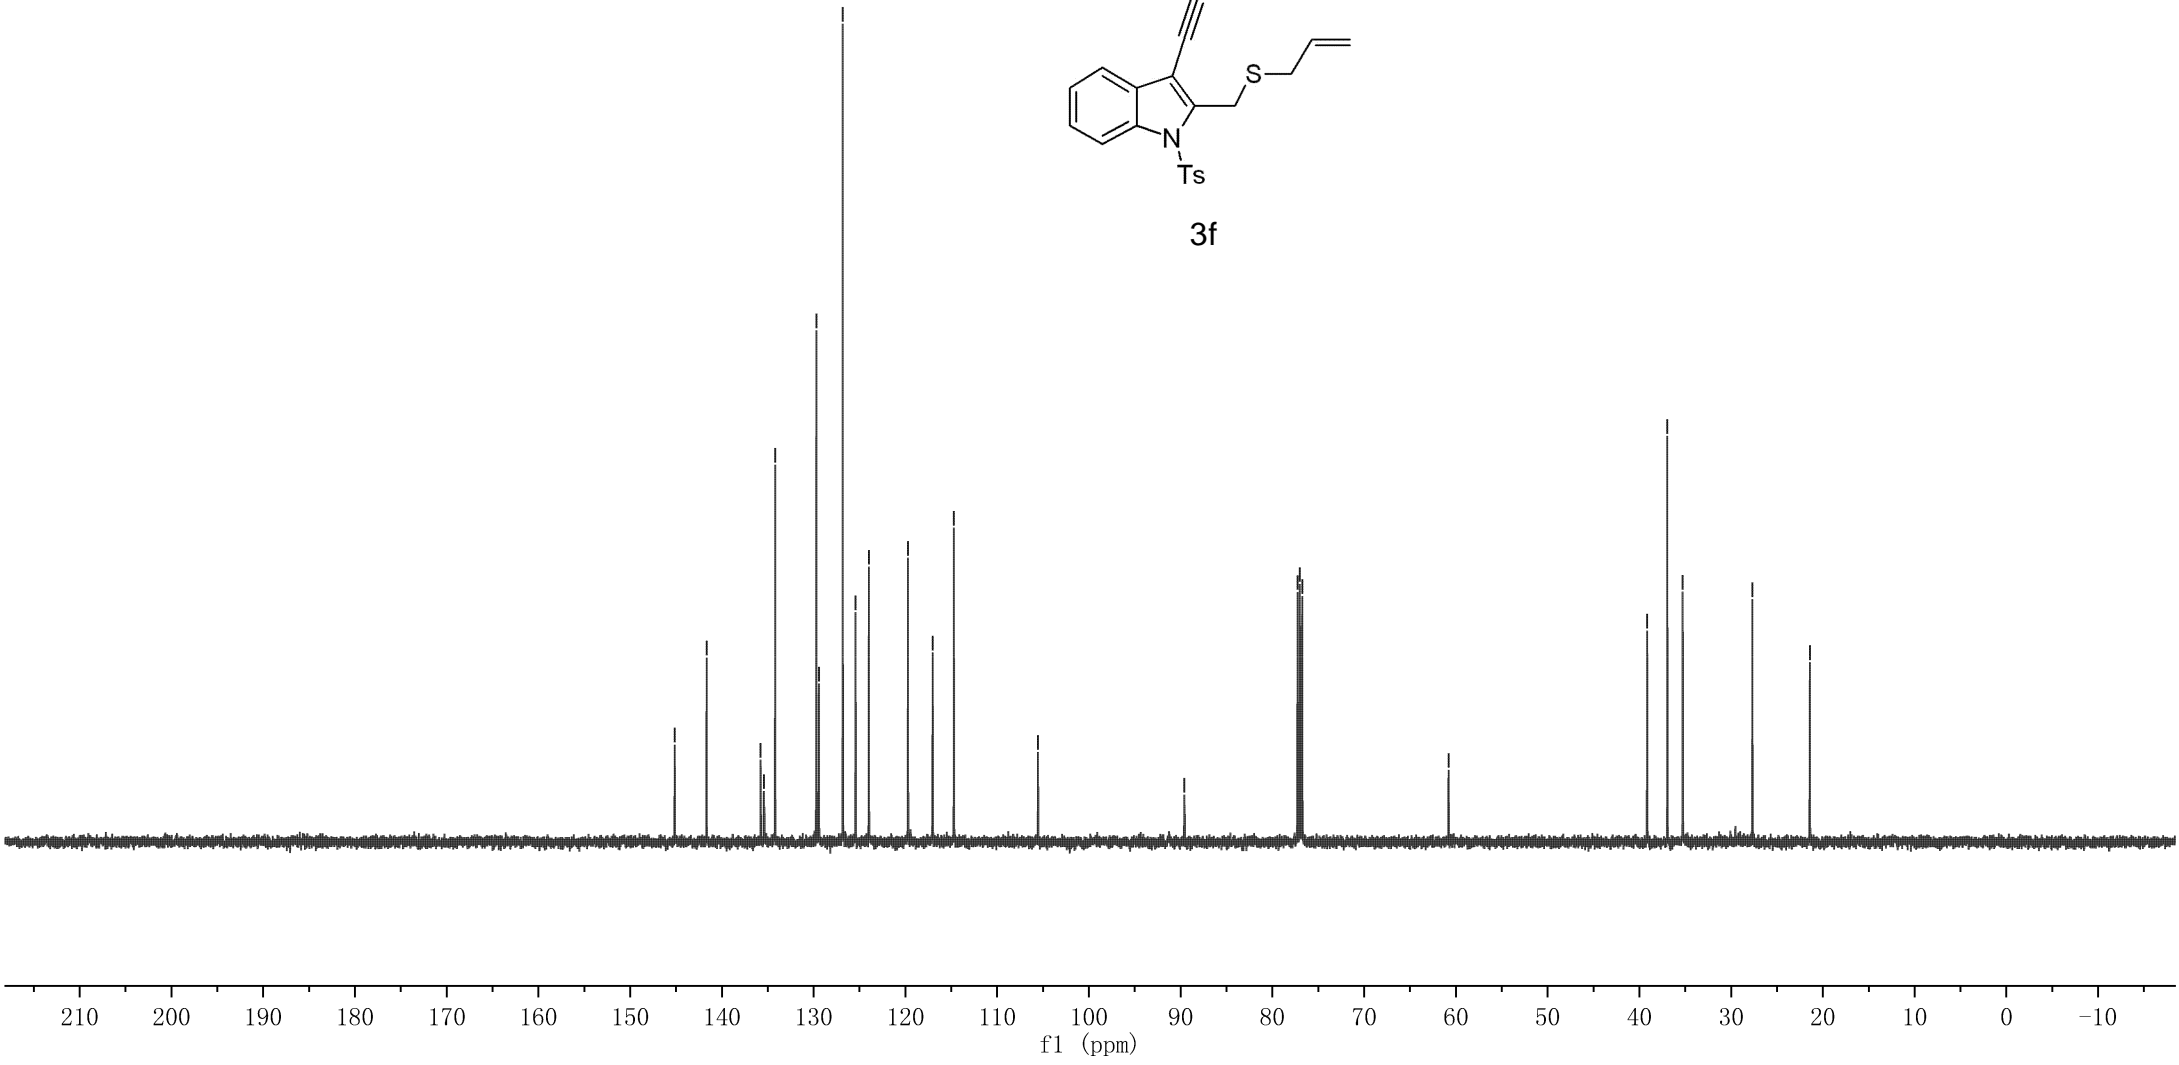

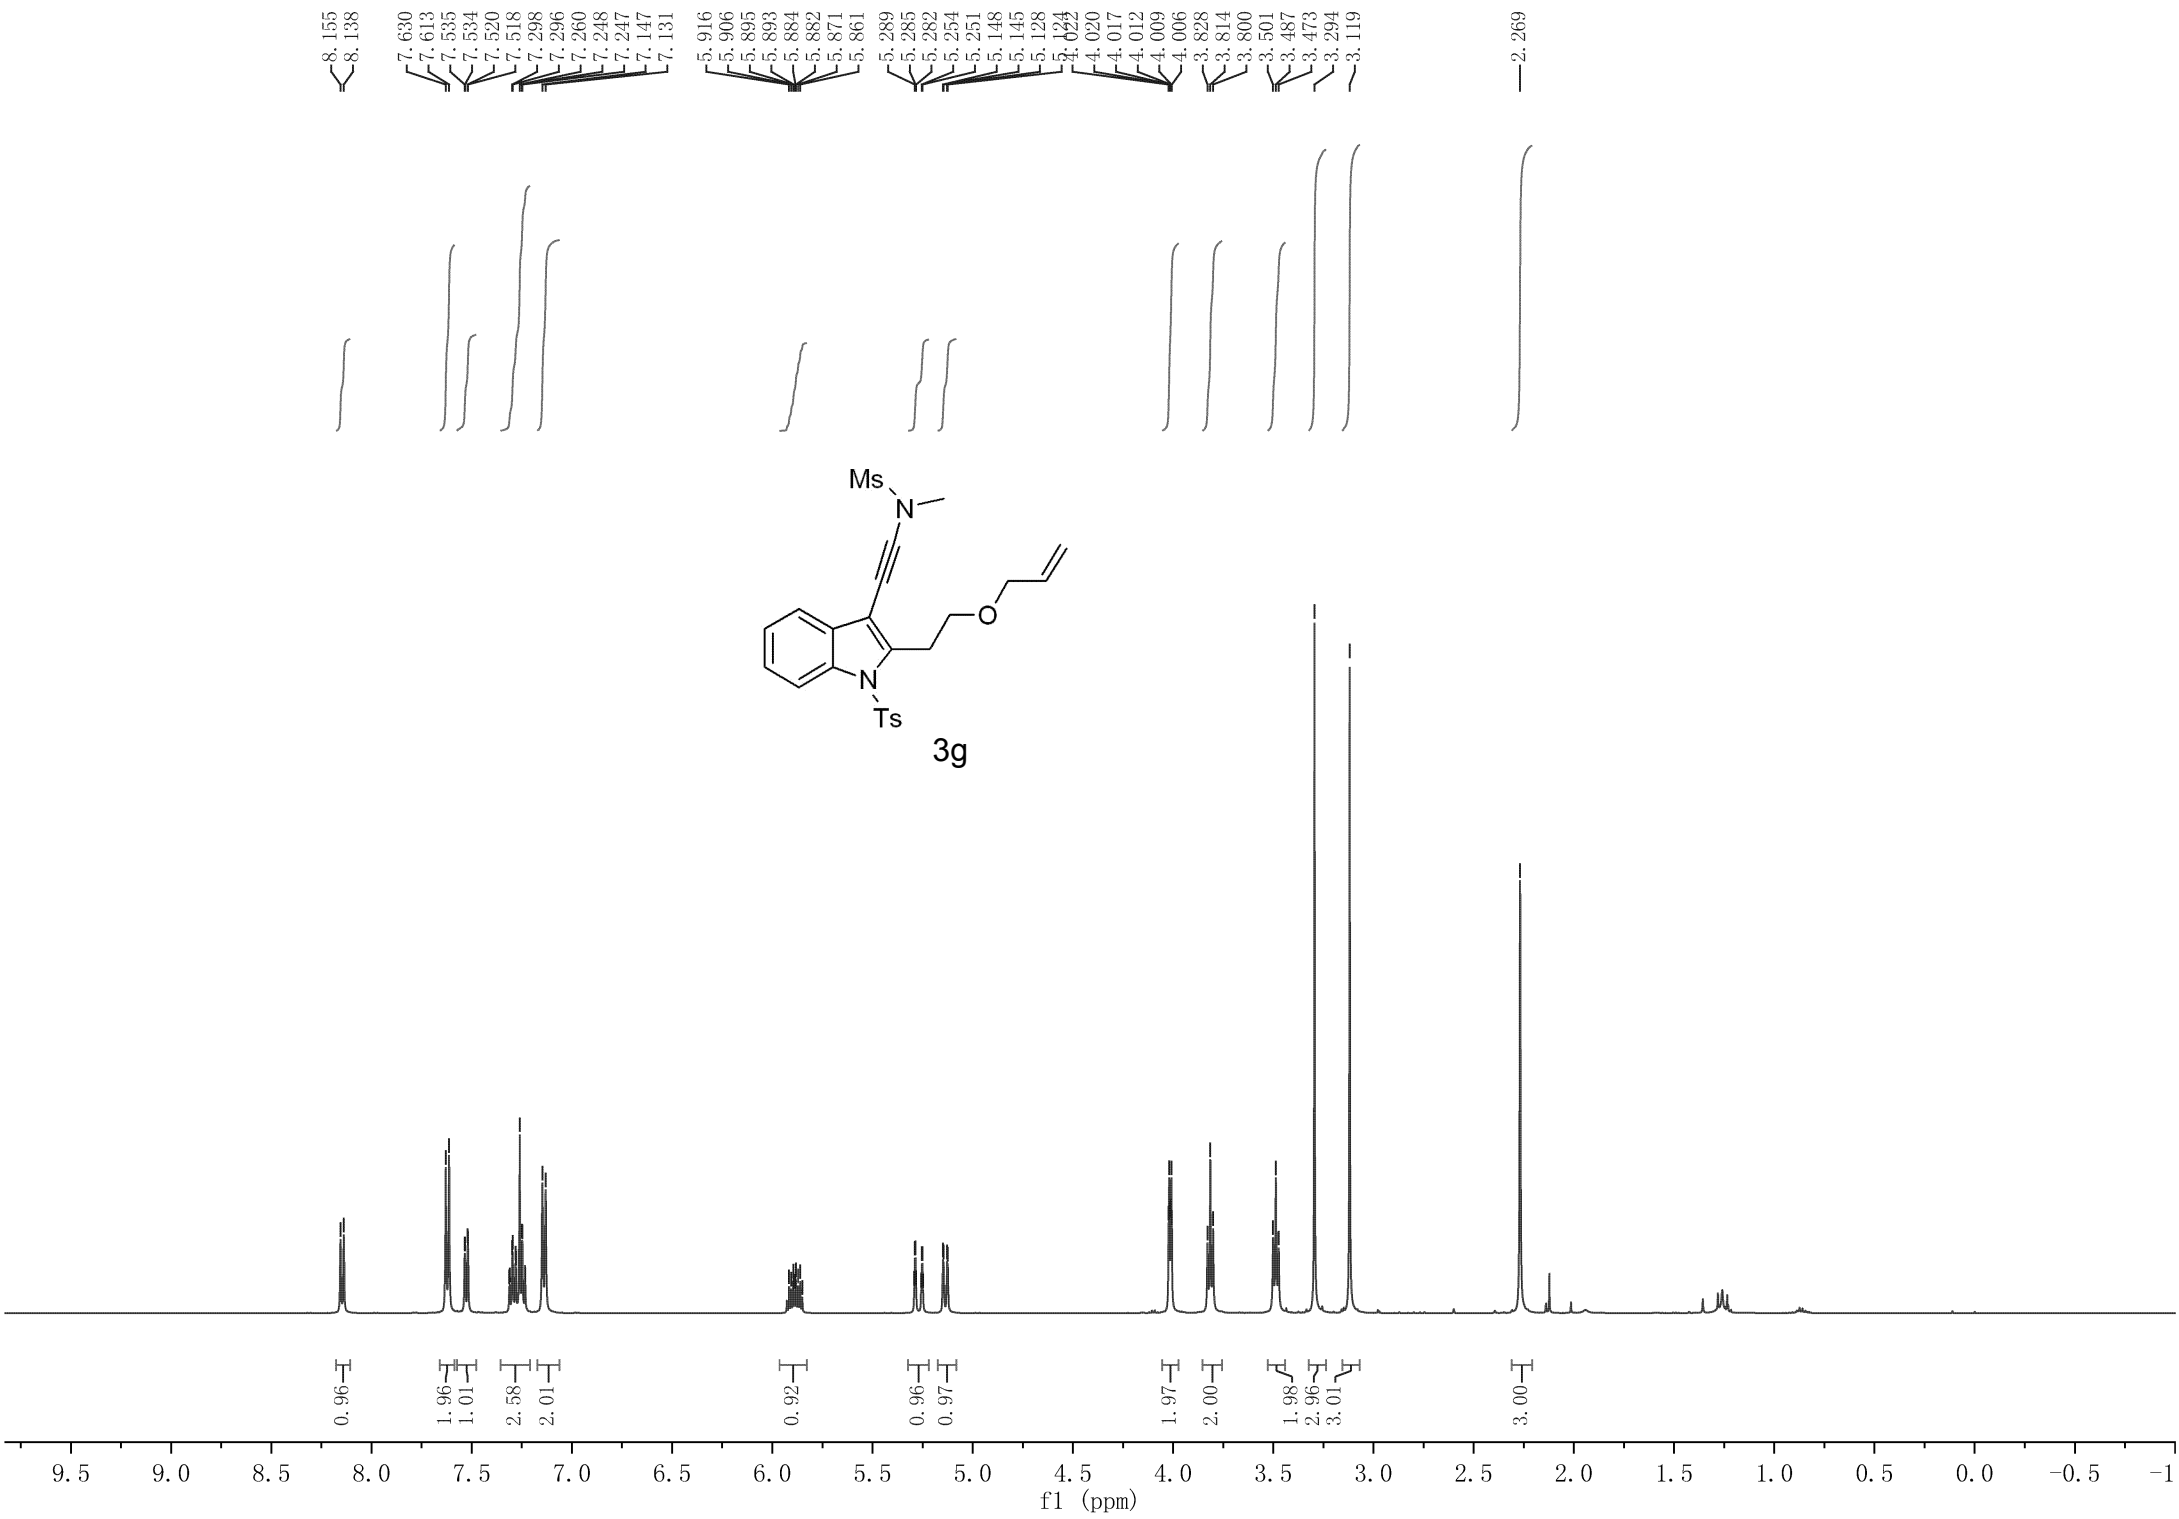

145.13  
141.61  
135.95  
135.60  
134.77  
129.90  
129.86  
126.28  
125.07  
124.00  
119.50  
116.63  
114.83  
105.96  
89.03  
77.25  
77.00  
76.74  
71.63  
69.40  
60.79  
39.26  
36.70  
28.78  
21.45

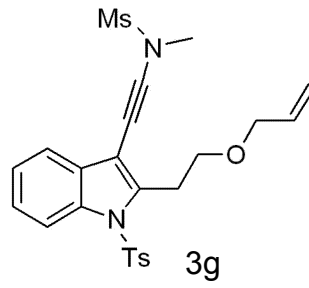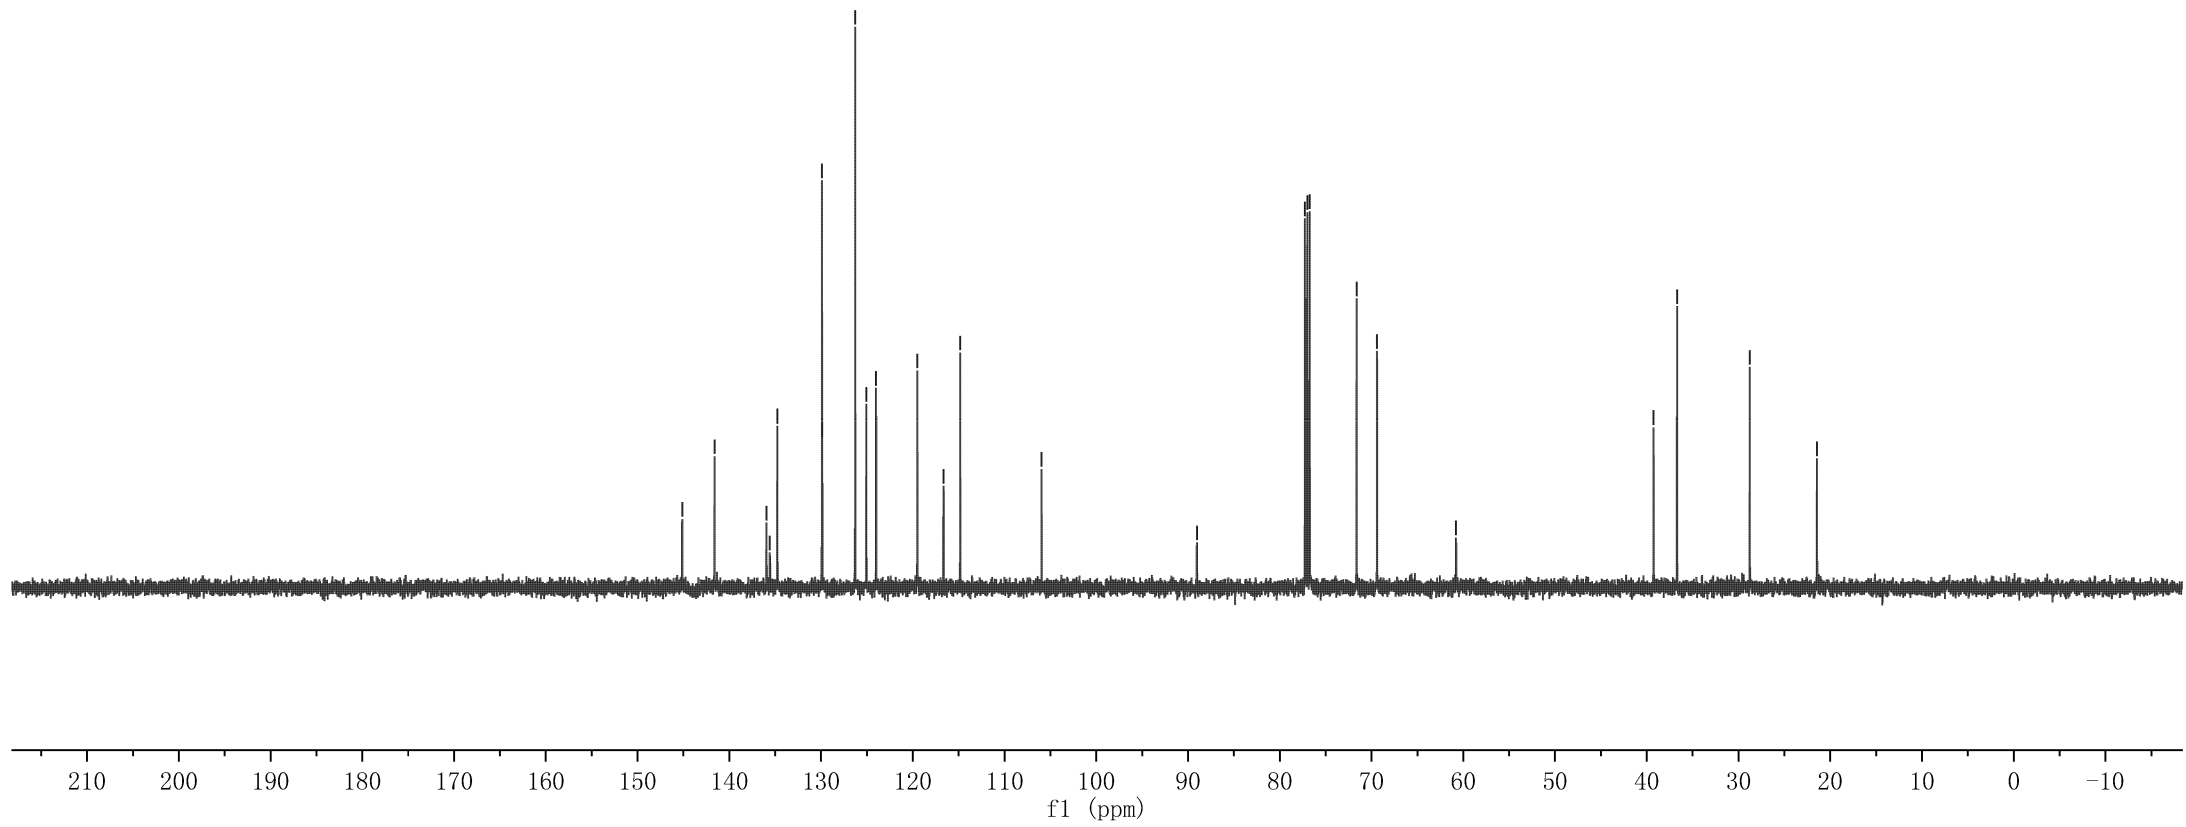

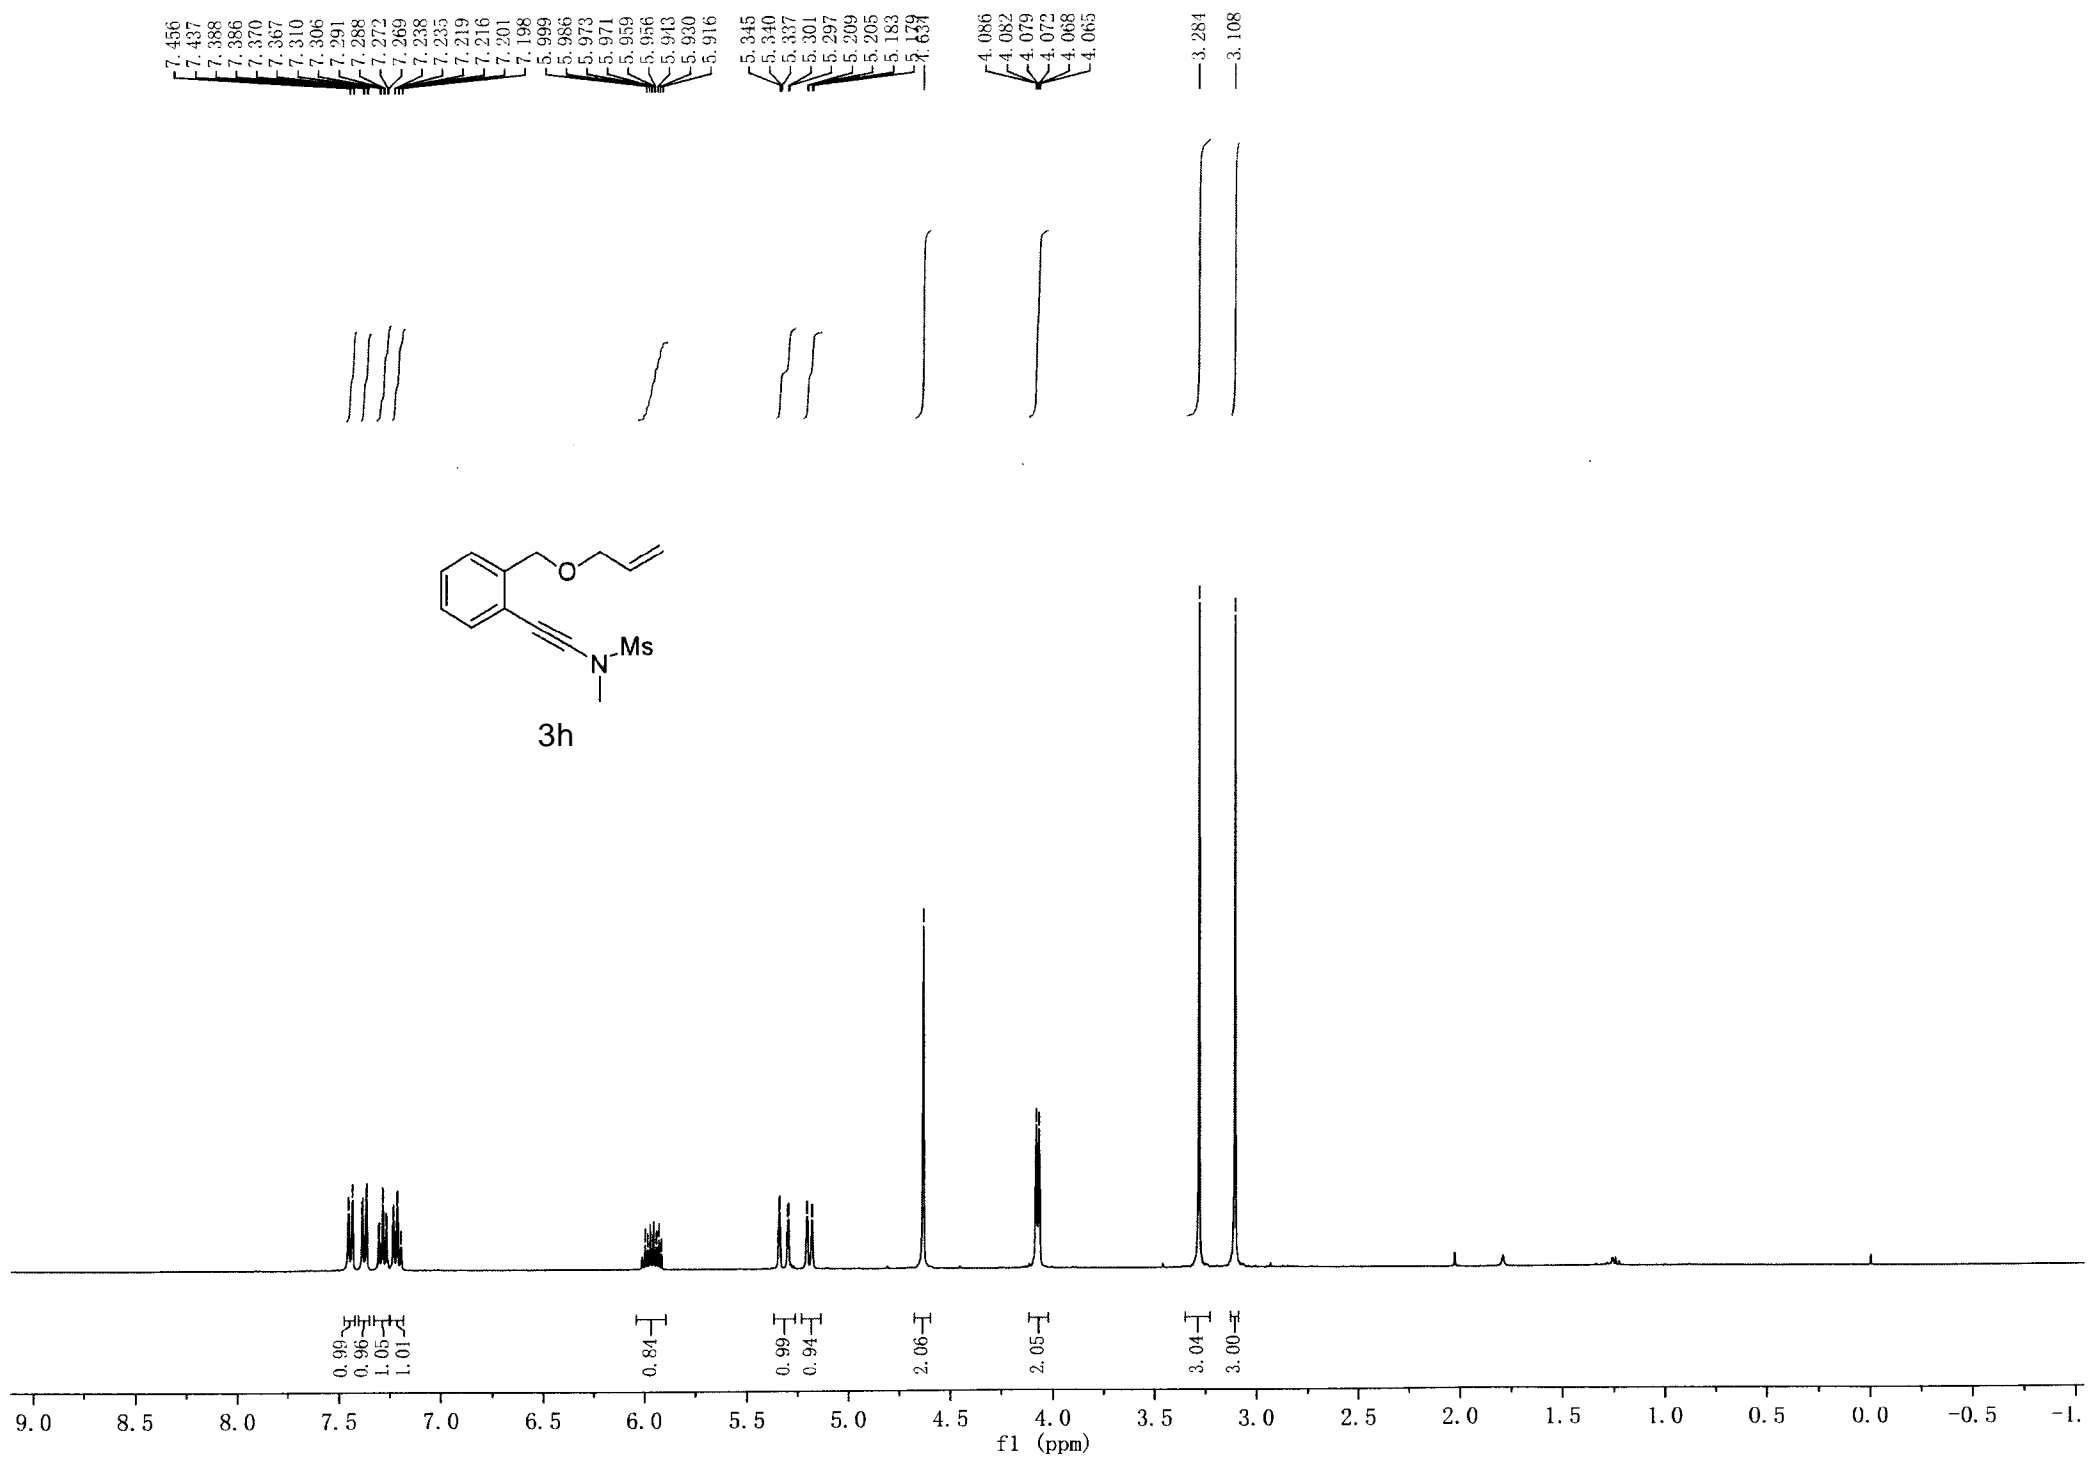

— 139.45  
— 134.65  
— 131.26  
— 127.90  
— 127.78  
— 127.22  
— 121.12  
— 116.87

— 87.30  
— 77.32  
— 77.00  
— 76.68  
— 71.34  
— 70.25  
— 67.40

— 39.00  
— 36.66

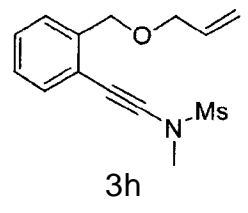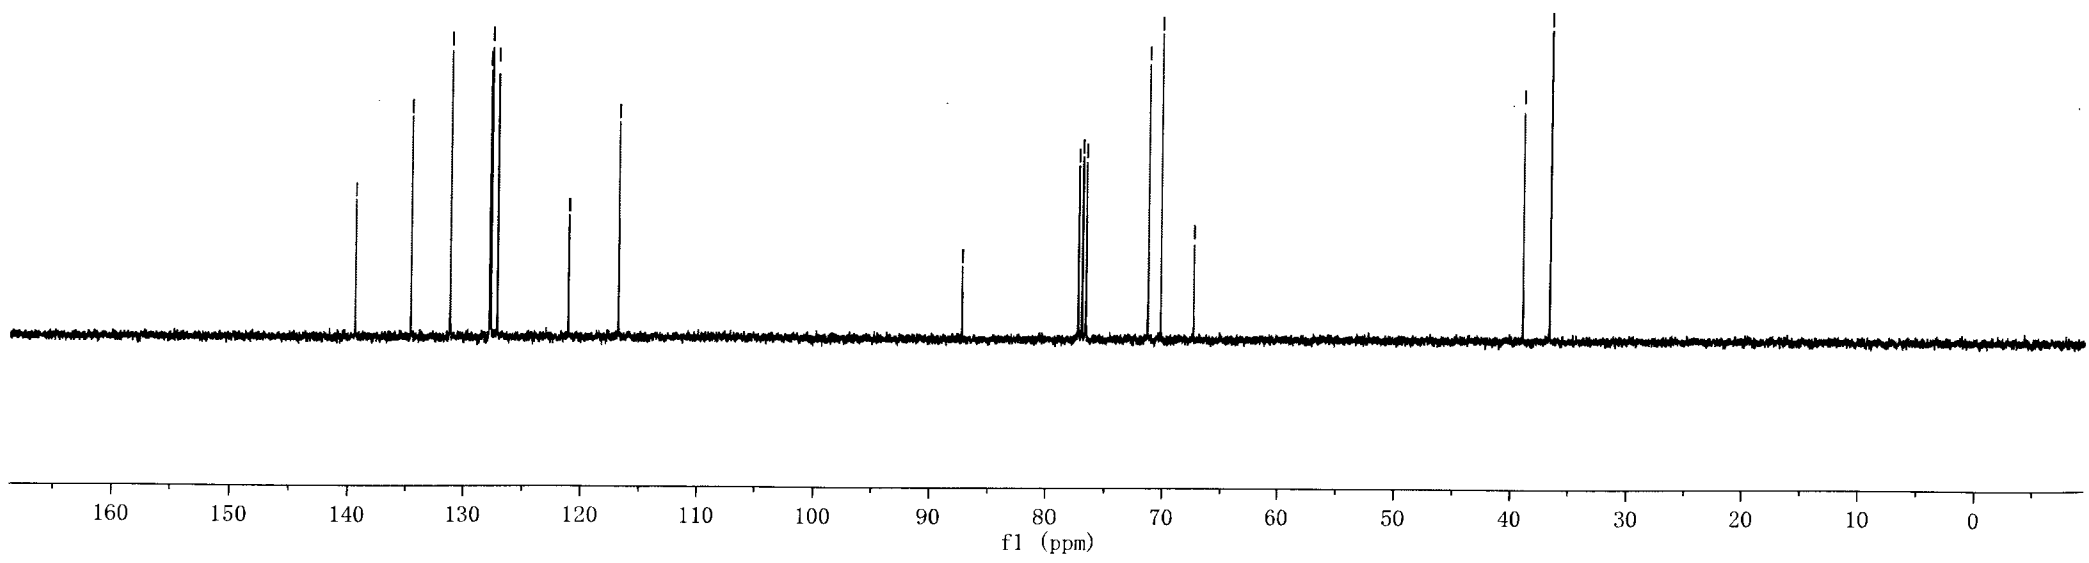

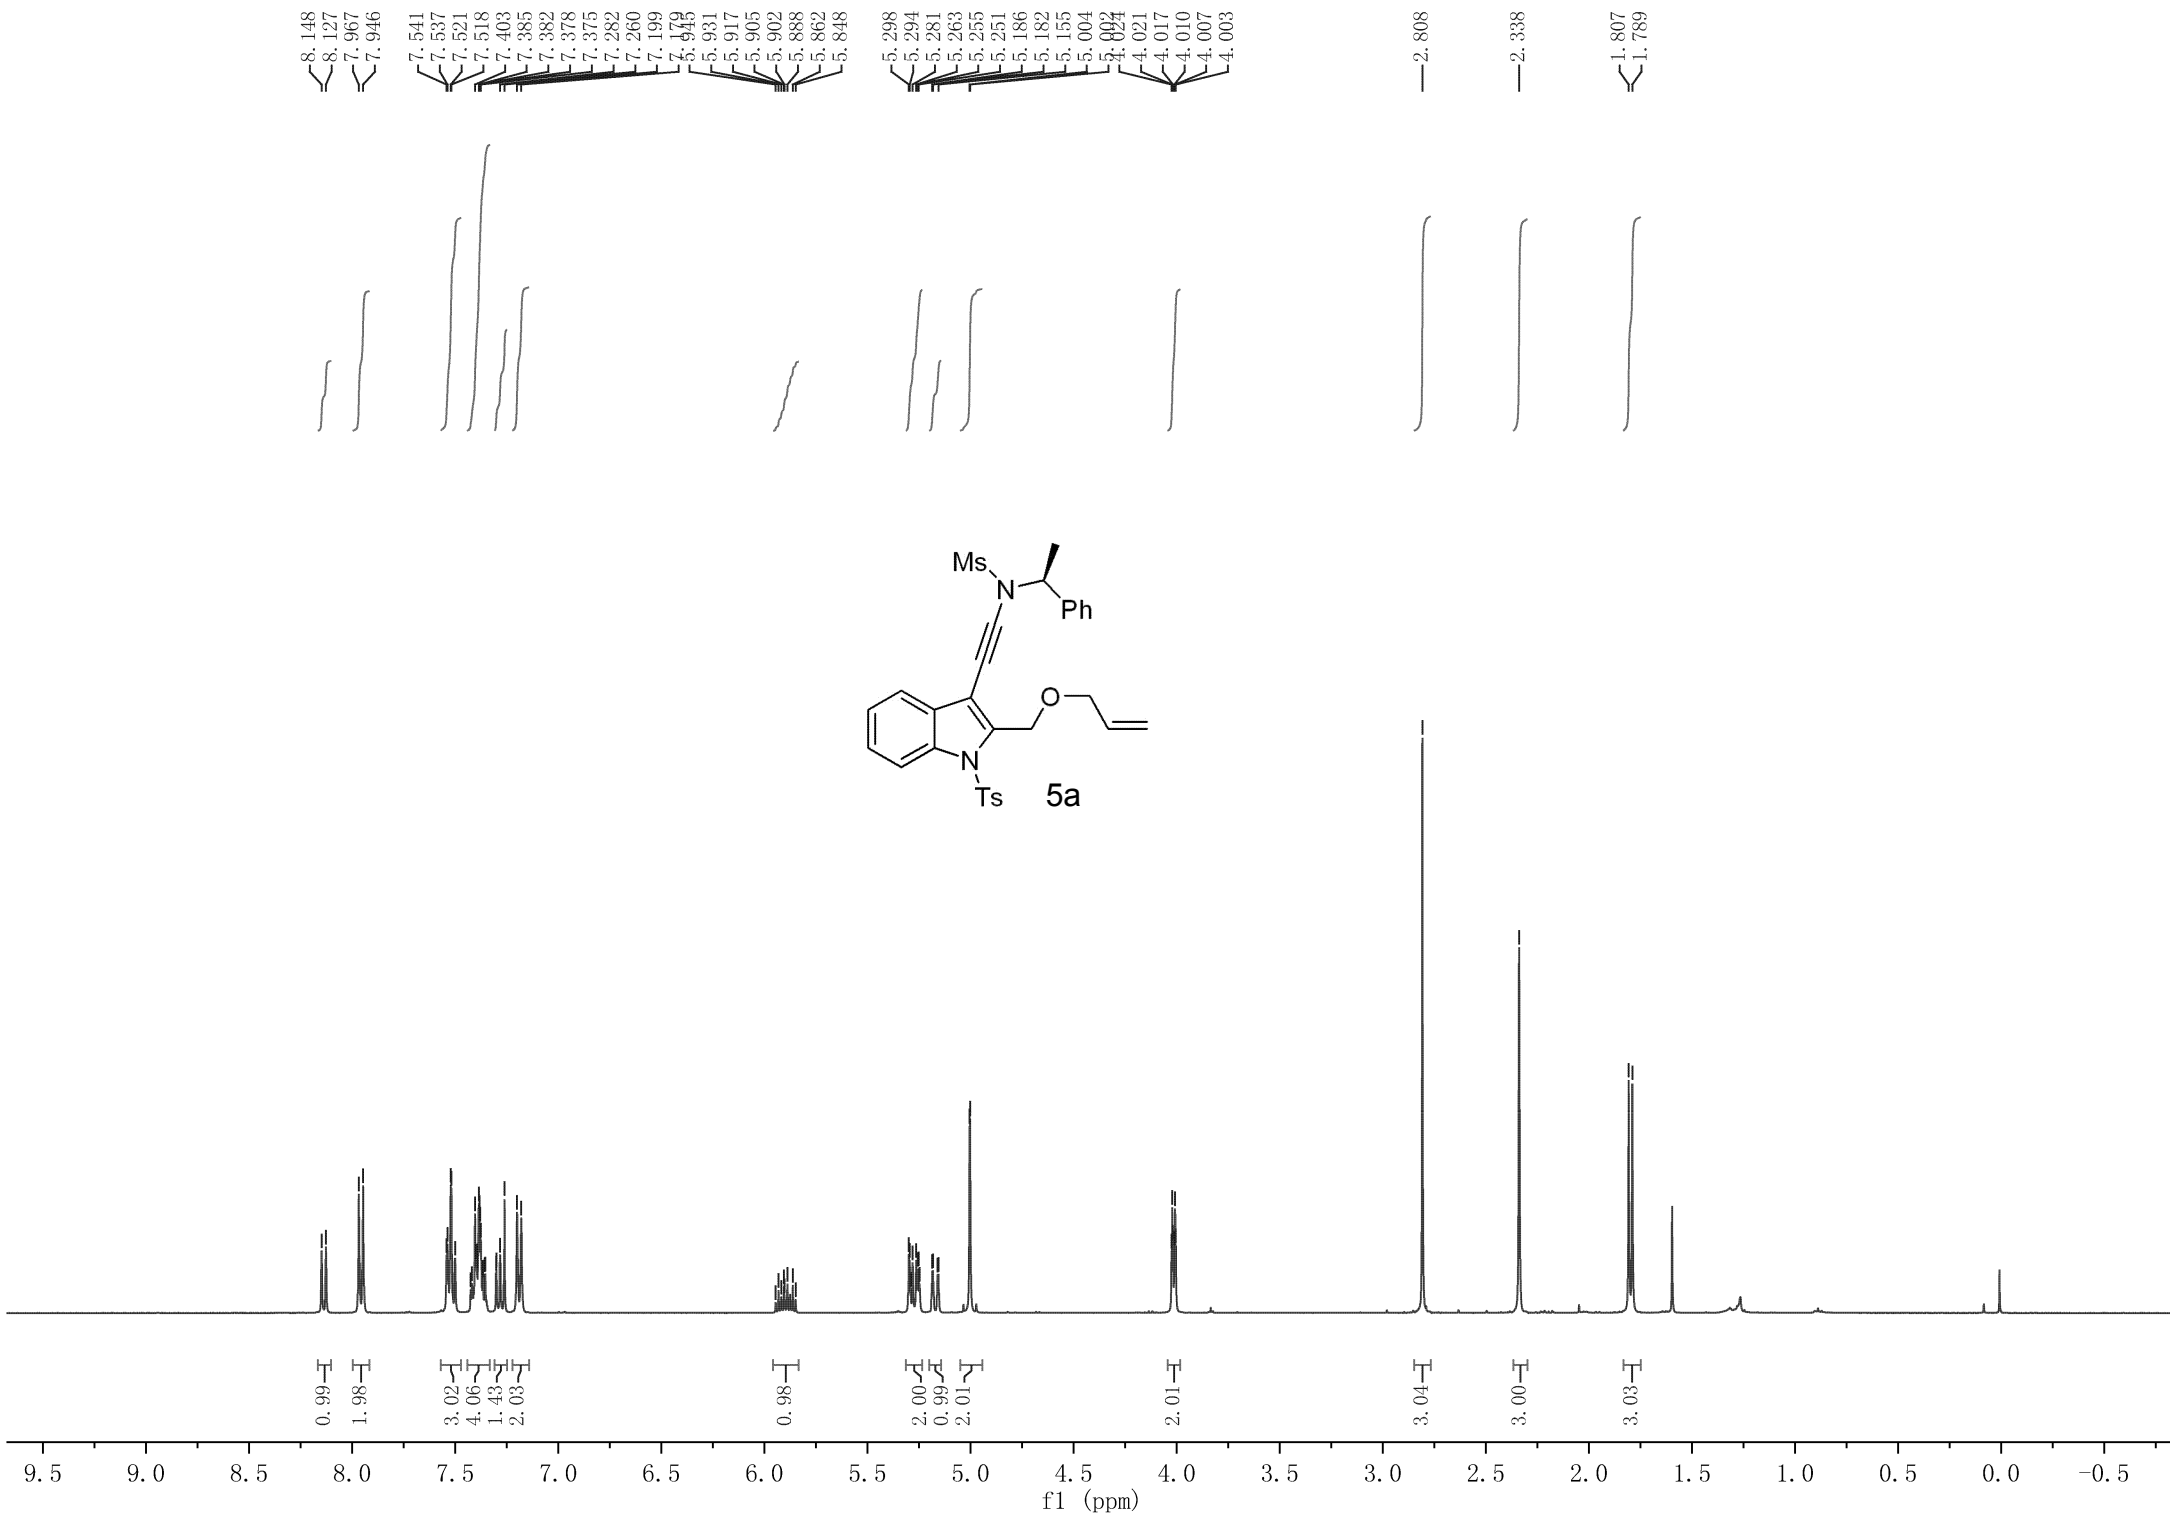

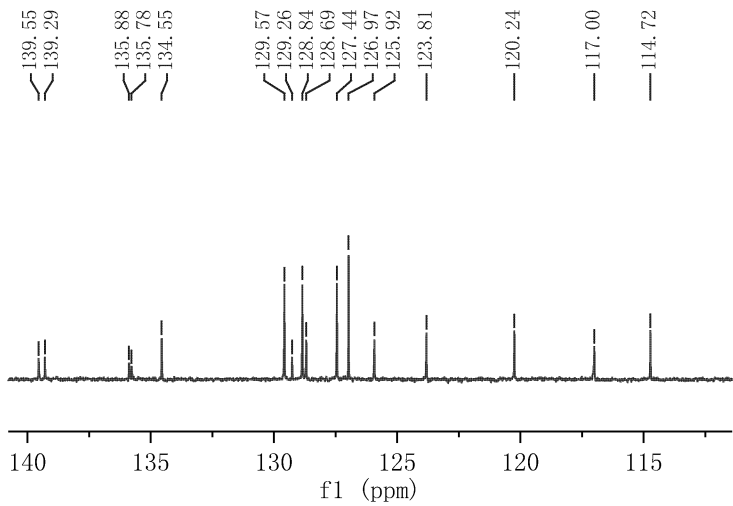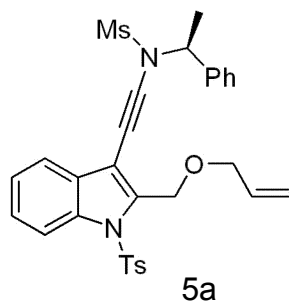

144.93  
139.55  
139.29  
135.88  
134.55  
129.57  
128.84  
128.69  
127.44  
126.97  
125.92  
123.81  
120.24  
117.83

85.82  
77.25  
77.00  
76.75  
71.20  
64.91  
62.76  
59.06

39.07

21.51  
19.88

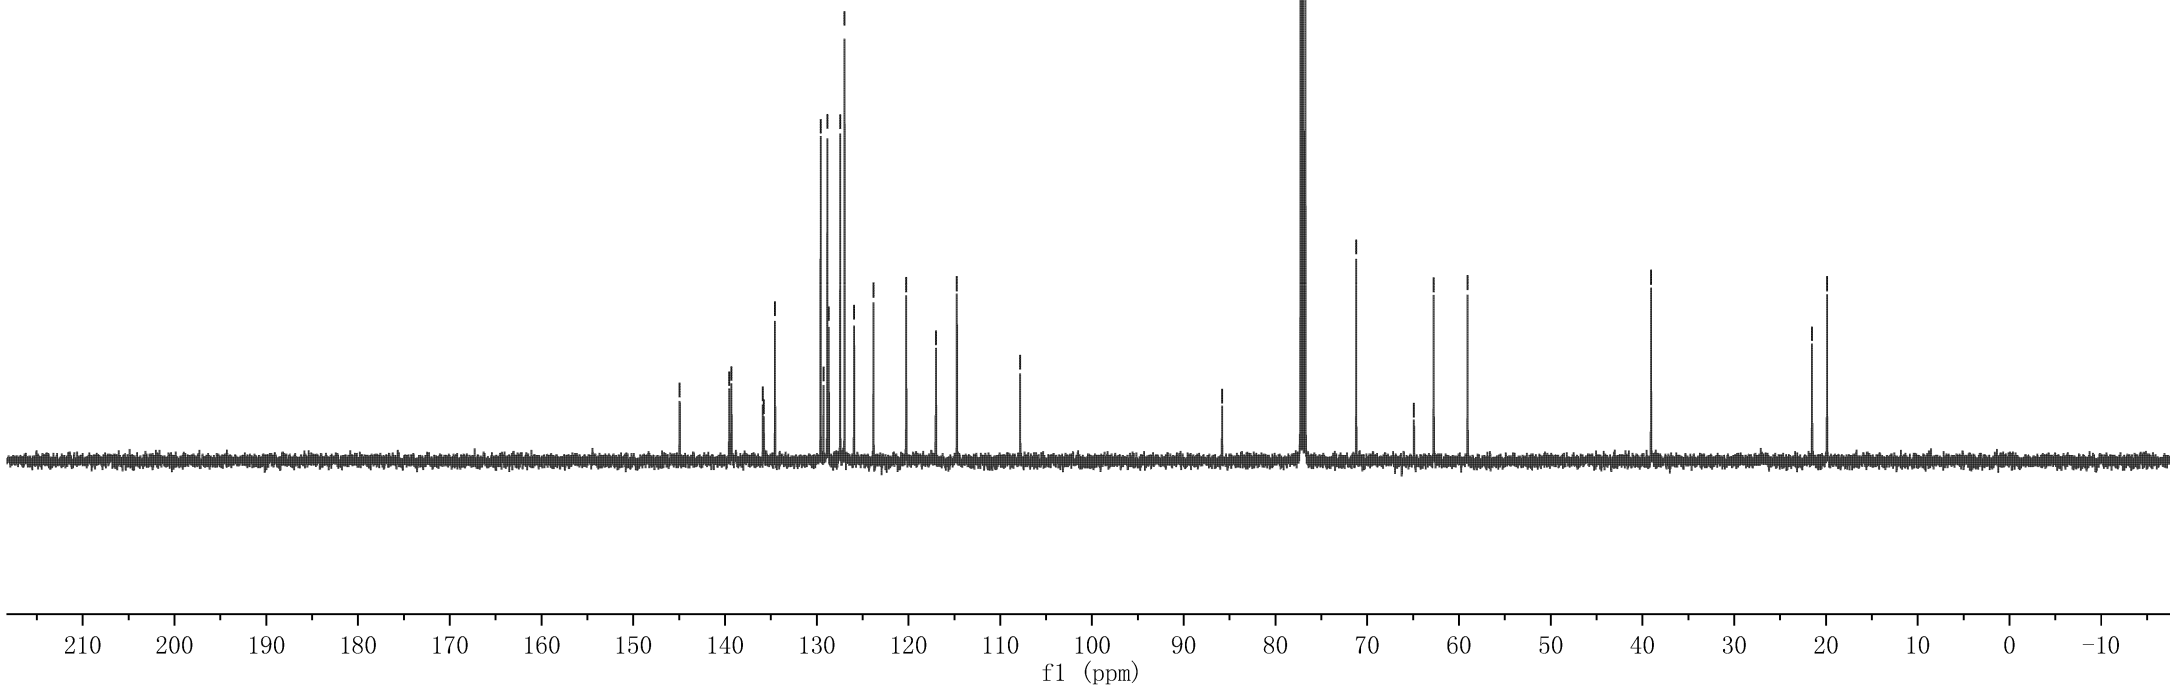



8.067  
8.046  
7.898  
7.877  
7.477  
7.459  
7.444  
7.429  
7.410  
7.306  
7.286  
7.260  
7.243  
7.197  
7.179  
7.149  
7.068  
5.849  
5.836  
5.822  
5.806  
5.780  
5.766  
5.193  
5.187  
5.166  
5.146  
4.831  
4.809  
4.787  
4.364  
4.345  
4.343  
4.324  
3.804  
3.790

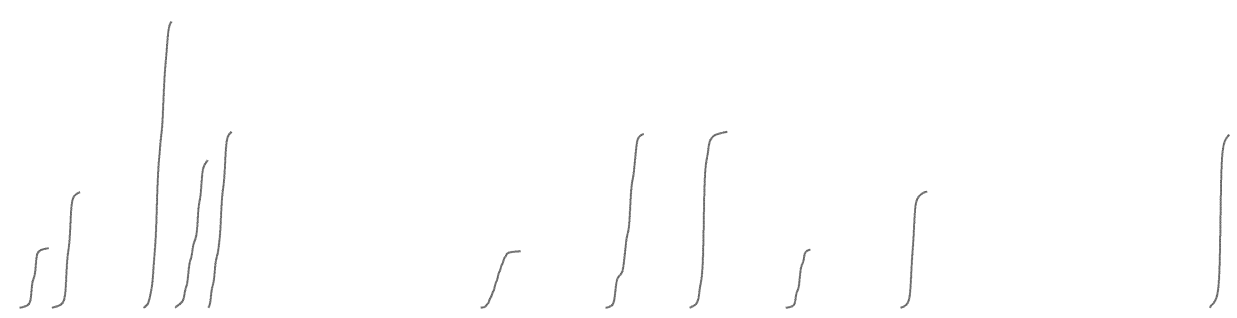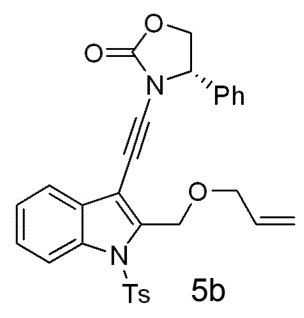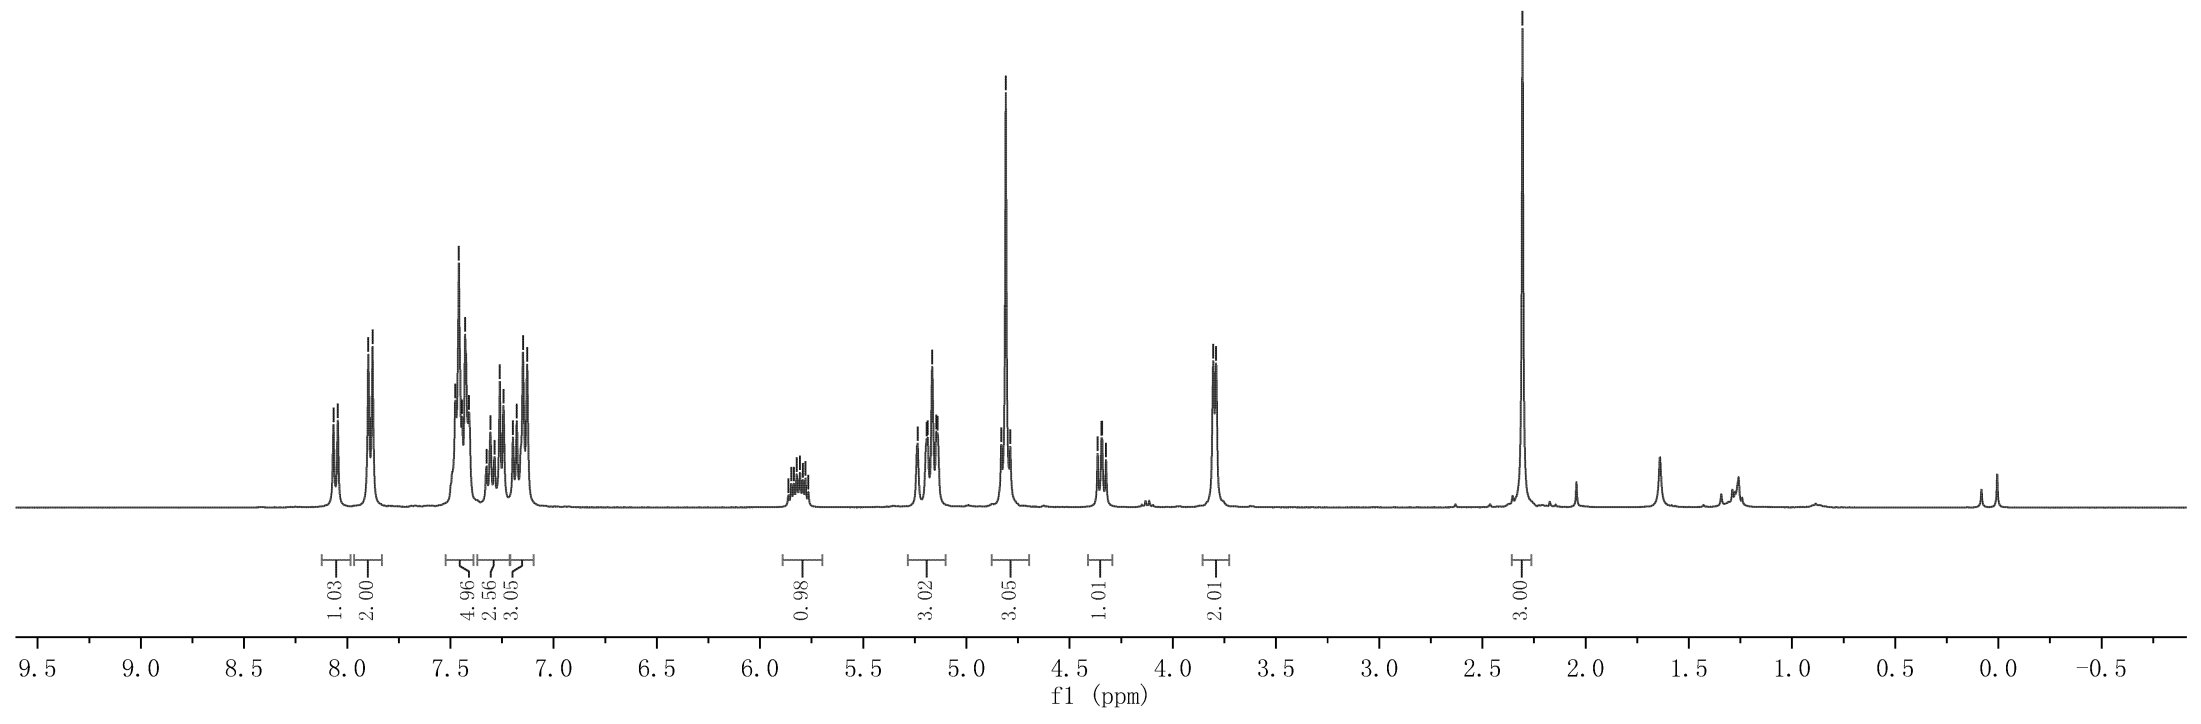

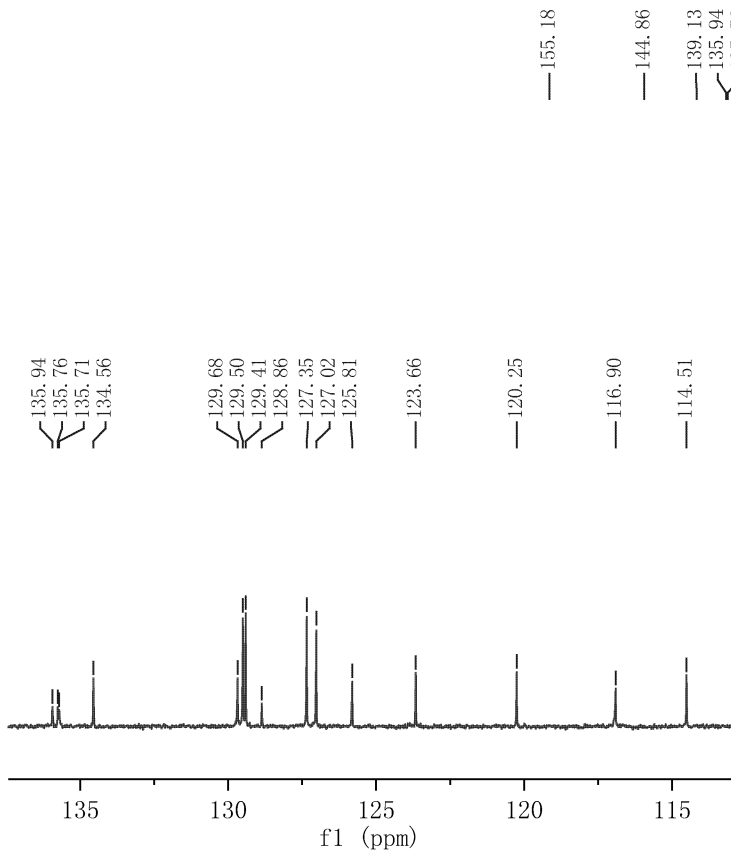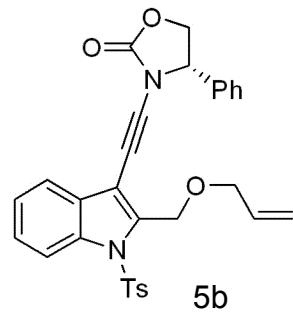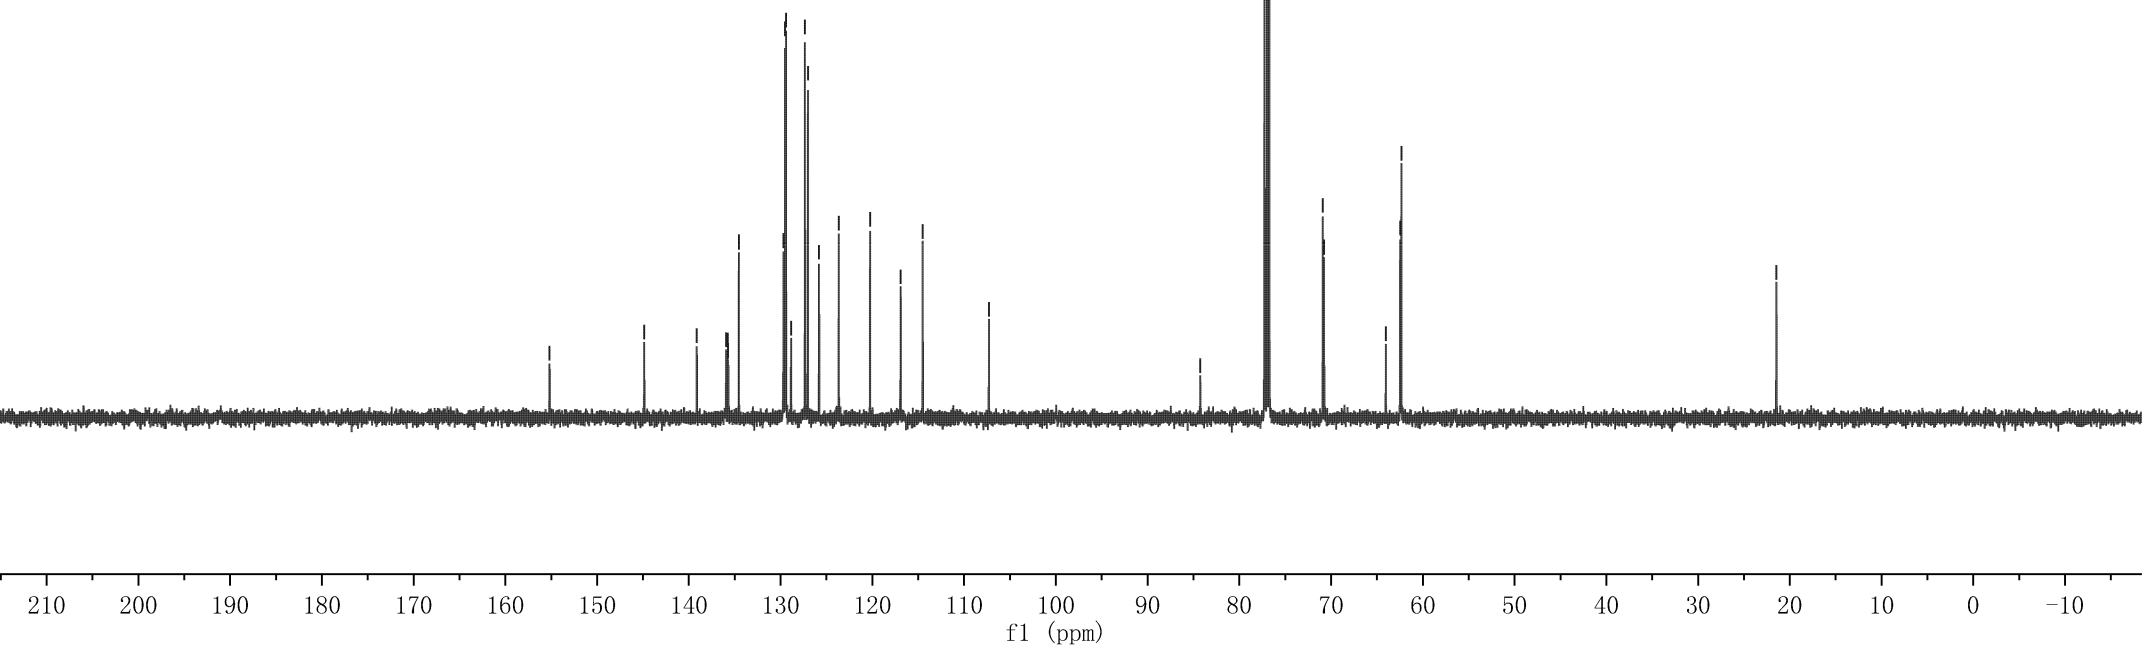

8.168  
8.147  
7.981  
7.960  
7.456  
7.381  
7.360  
7.334  
7.317  
7.281  
7.269  
7.260  
7.195  
7.175  
5.990  
5.978  
5.964  
5.948  
5.935  
5.922  
5.908  
5.353  
5.310  
5.224  
5.199  
4.986  
4.956  
4.970  
4.970  
4.557  
4.349  
4.283  
4.198  
4.182  
4.060  
4.046

—2.315

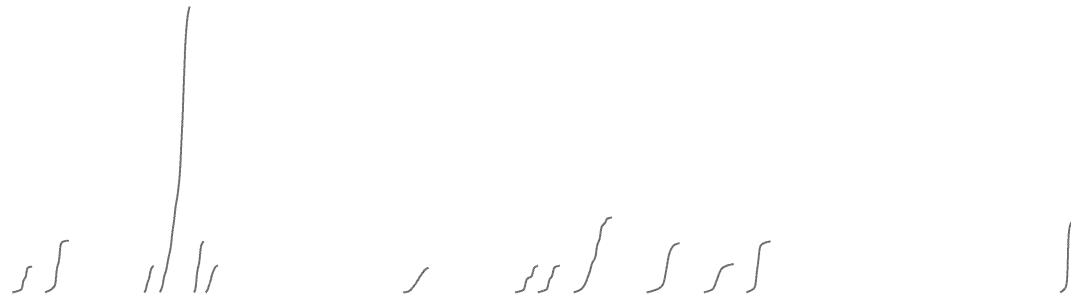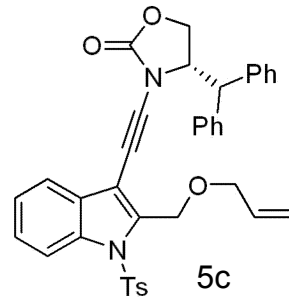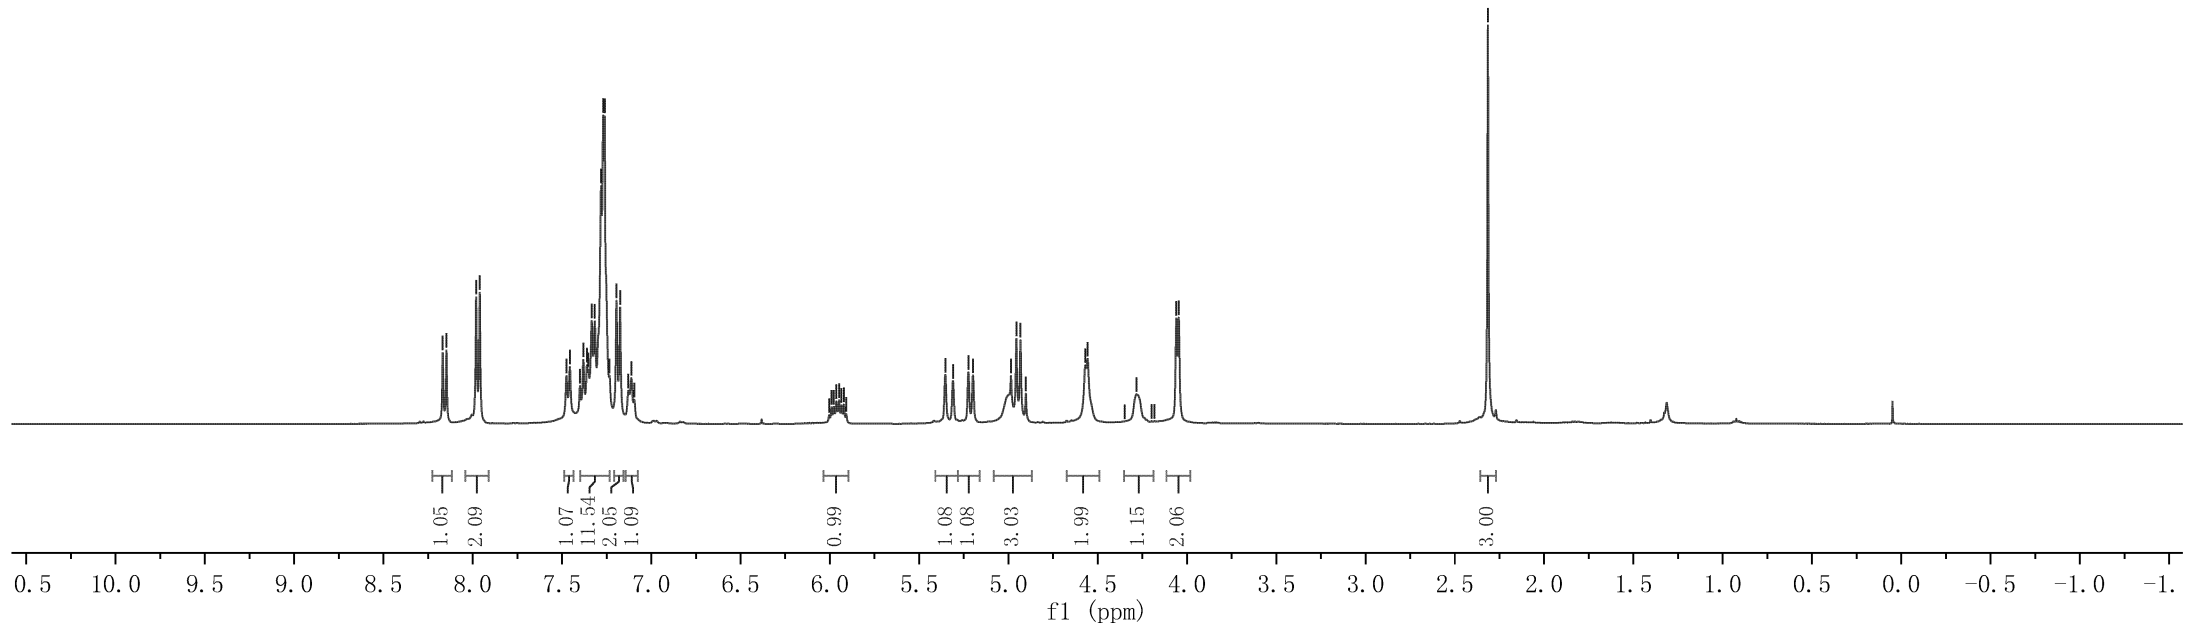



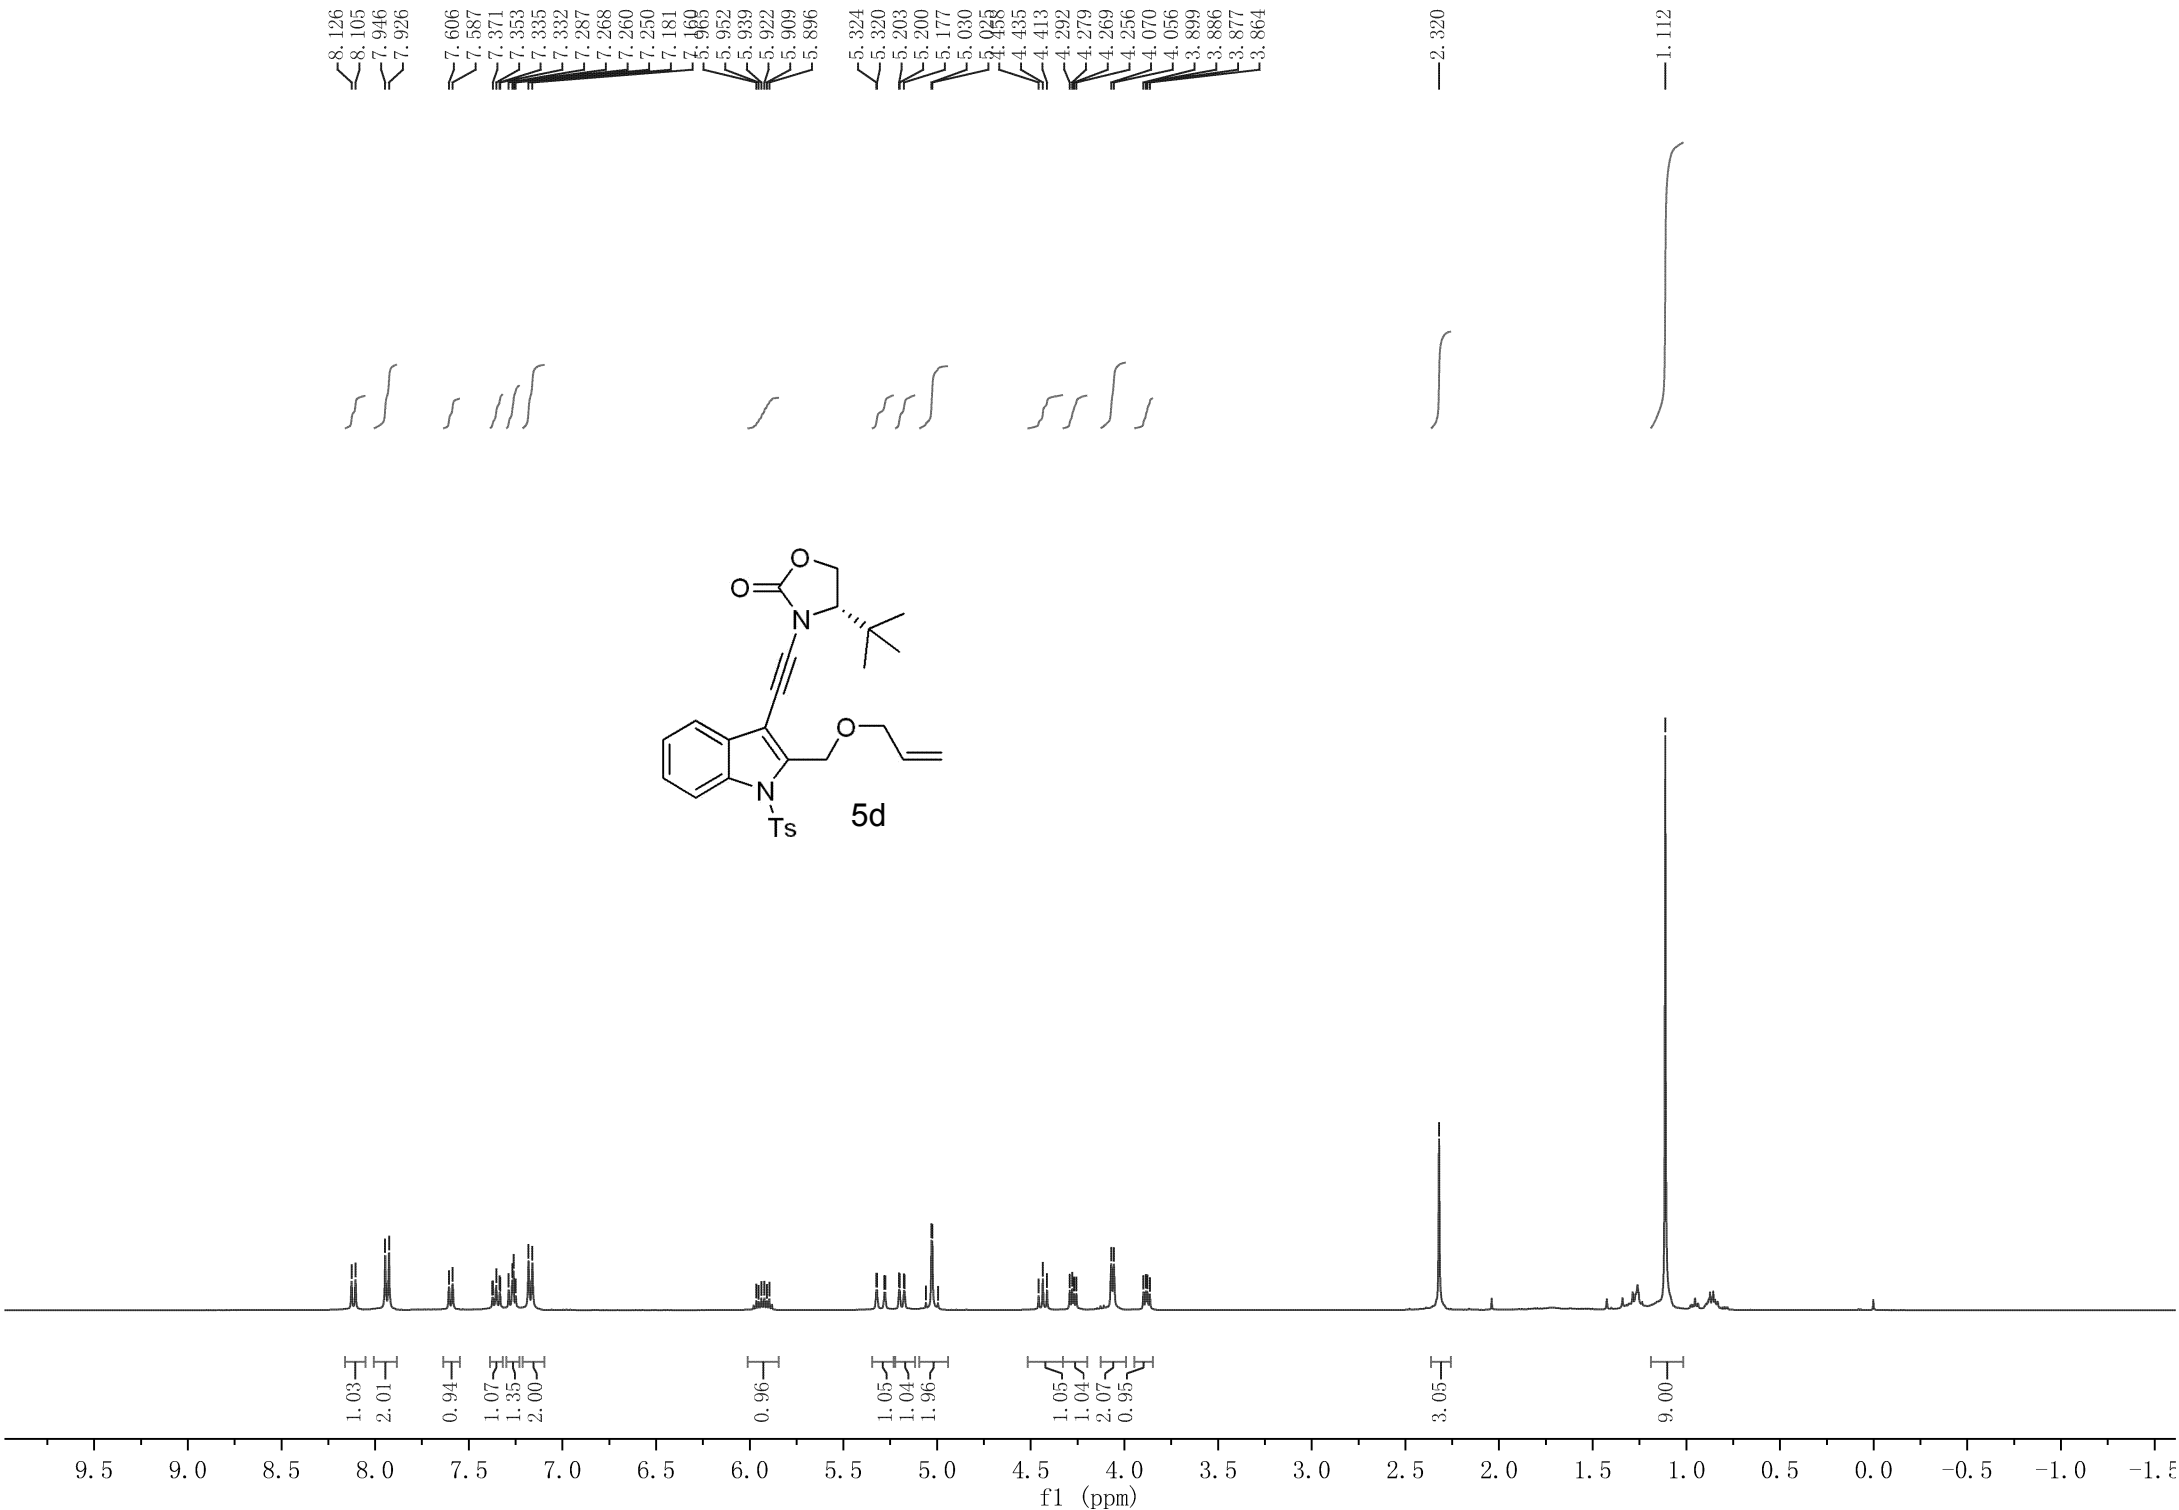

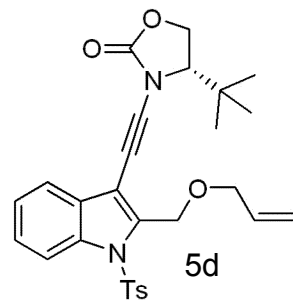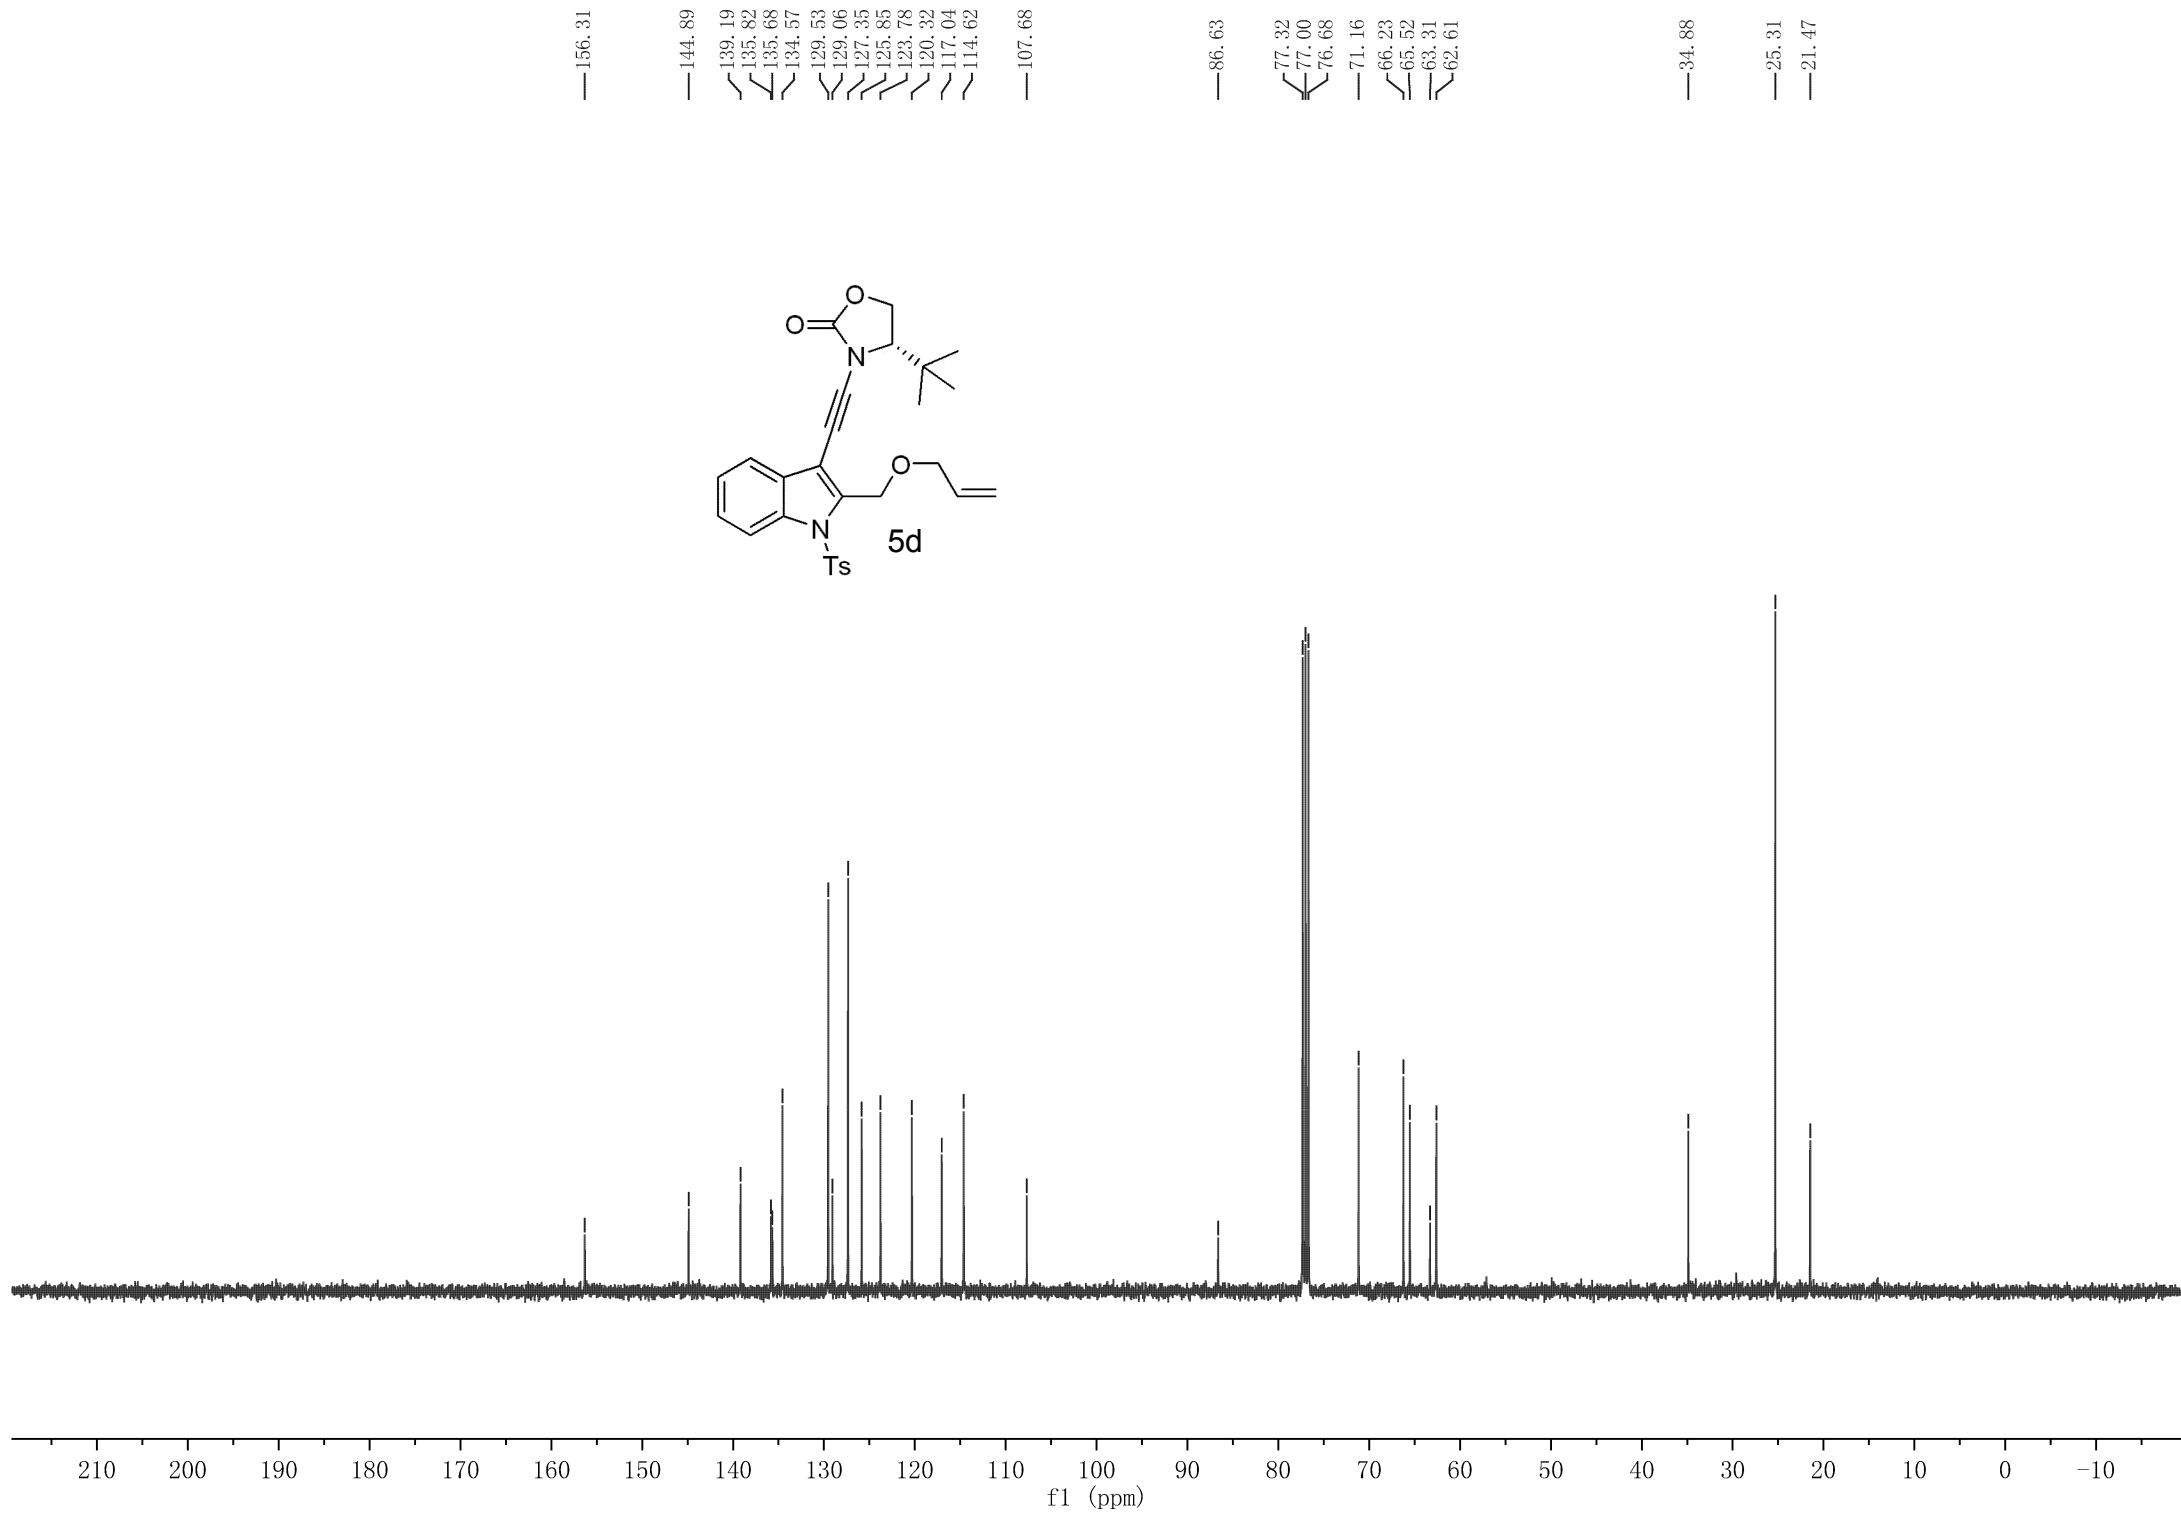

7.993  
7.972  
7.920  
7.899

7.369  
7.260  
7.171  
7.150

5.972  
5.958  
5.945  
5.932  
5.915  
5.902  
5.889  
5.875  
5.316  
5.312  
5.273  
5.269  
5.195  
5.169  
4.999  
4.458  
4.435  
4.413  
4.294  
4.281  
4.271  
4.258  
4.057  
4.043  
3.898  
3.885  
3.876  
3.864

2.408  
2.316

1.114

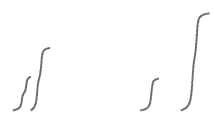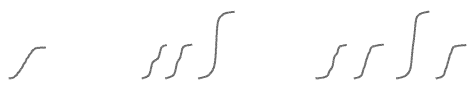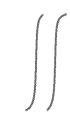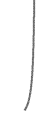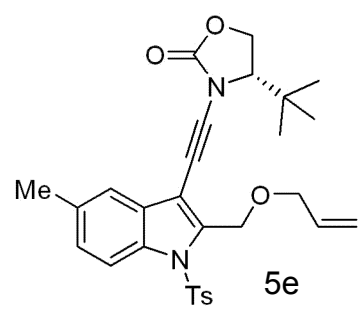

1.06  
1.96

1.00  
3.04

0.97

1.04  
1.06  
2.08

1.05  
1.06  
2.09  
1.04

3.00  
3.01

8.95

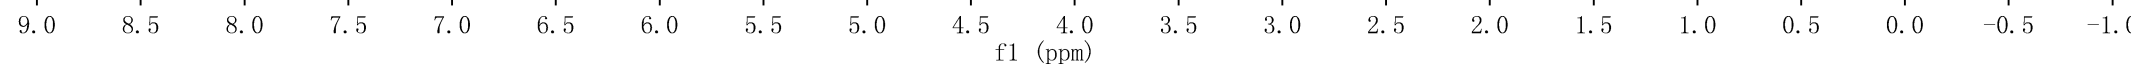

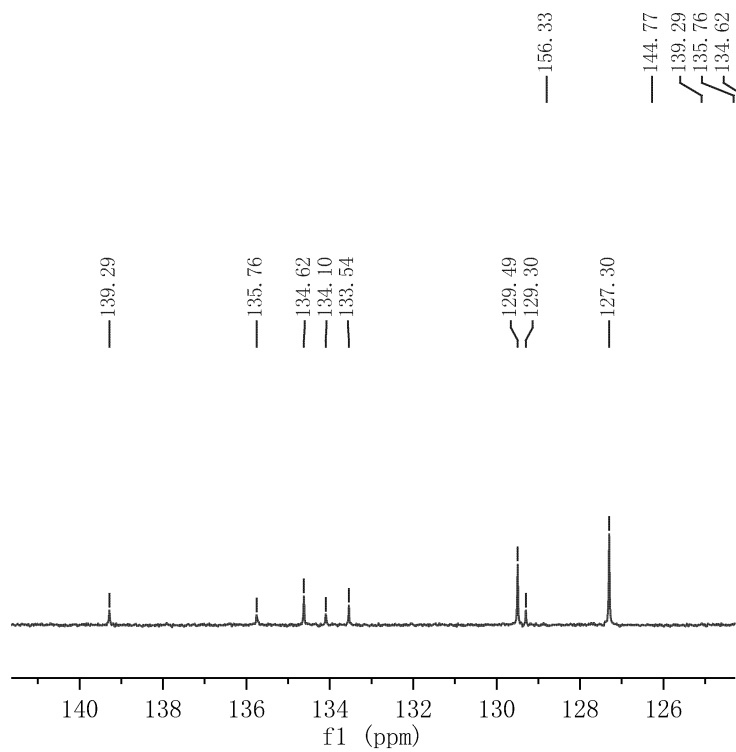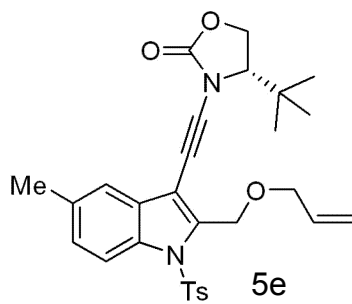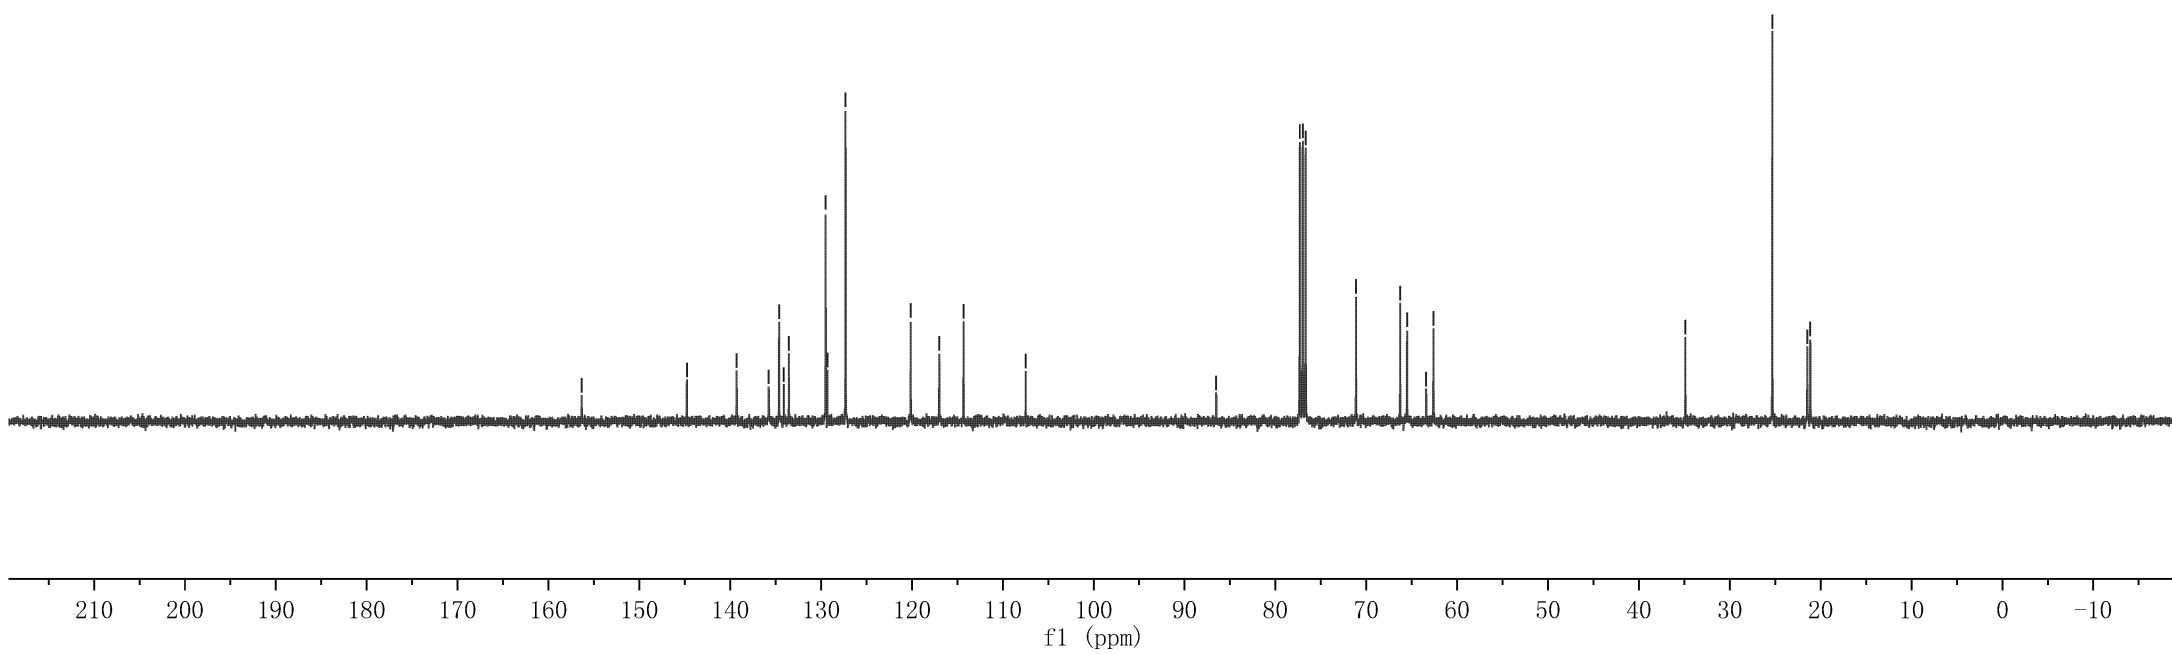



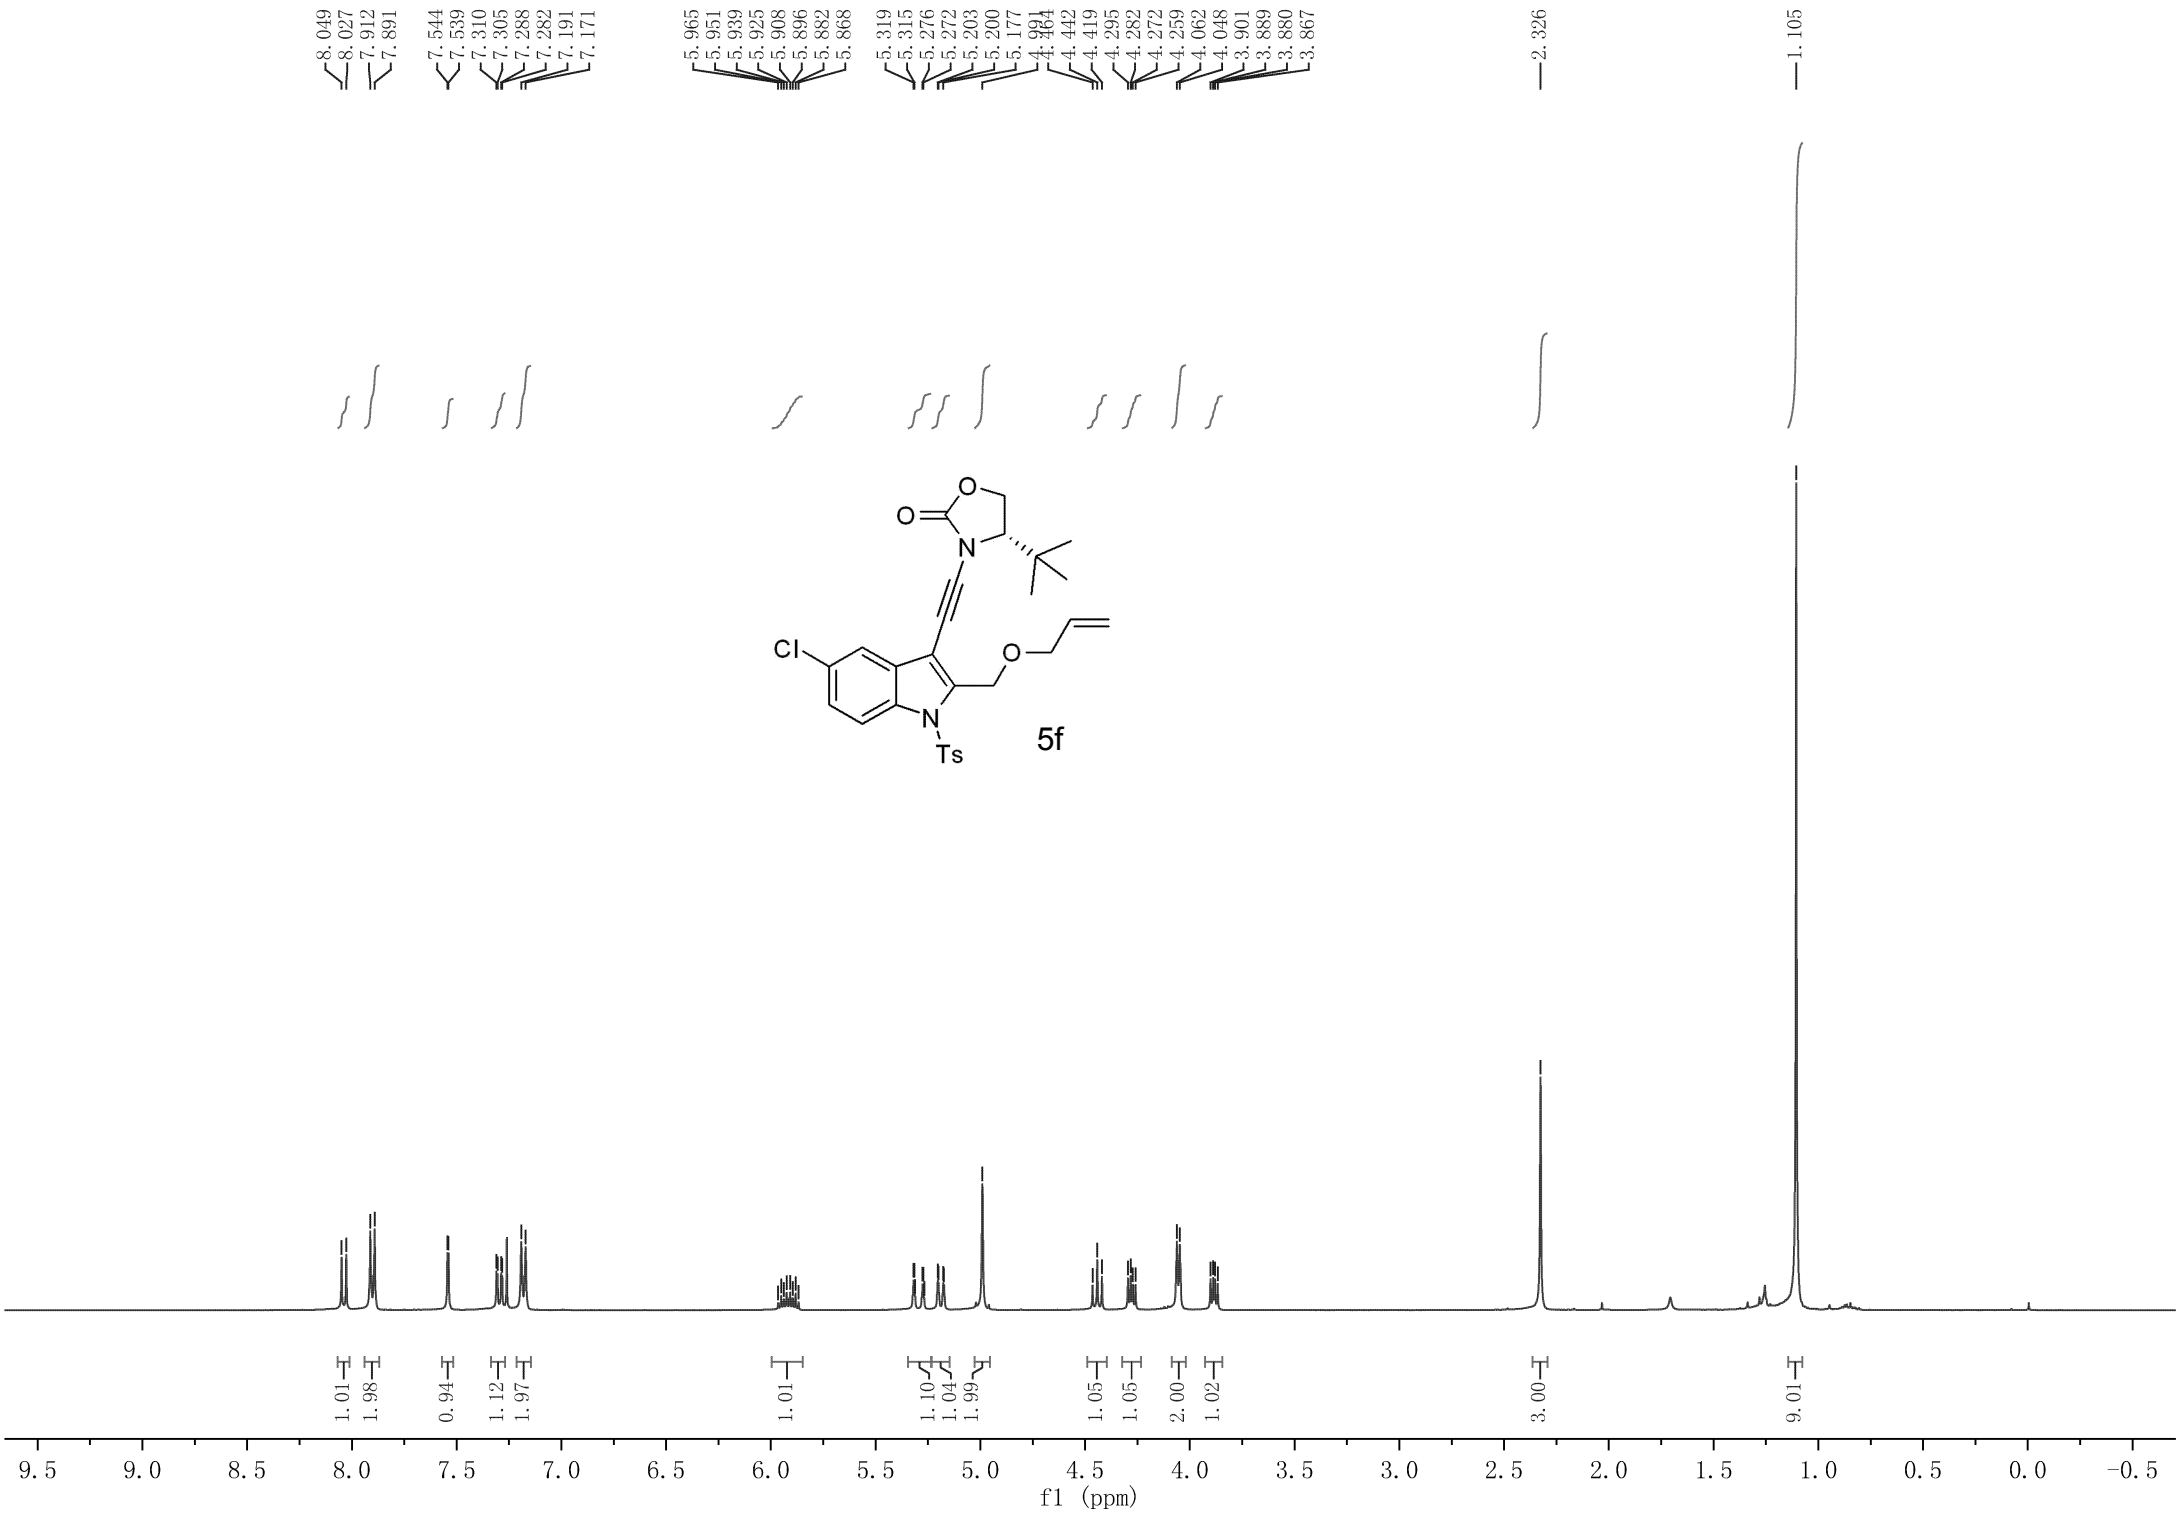

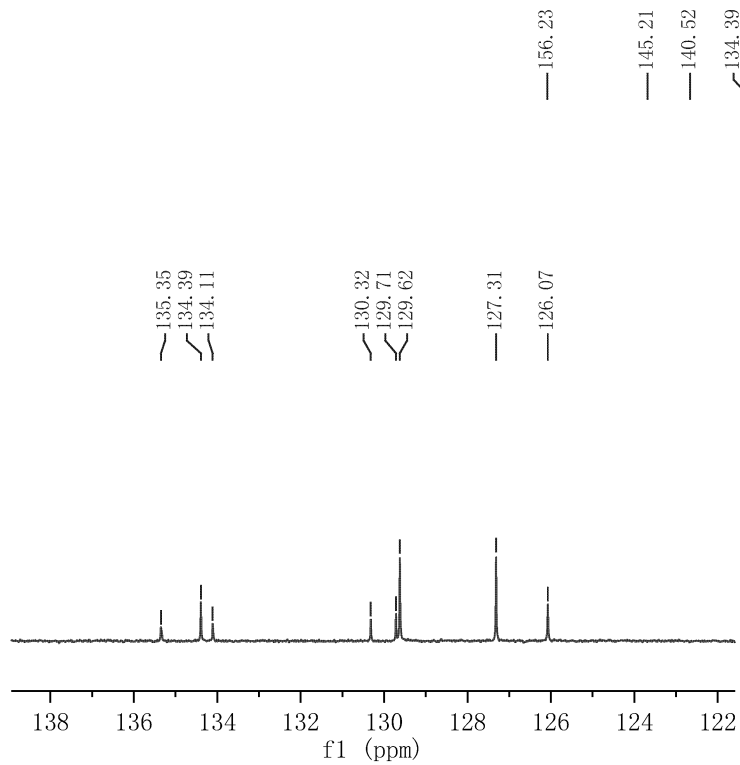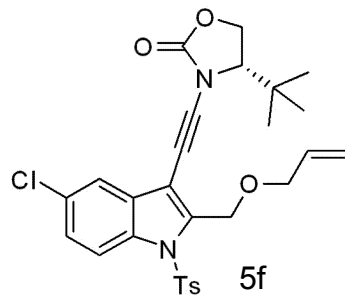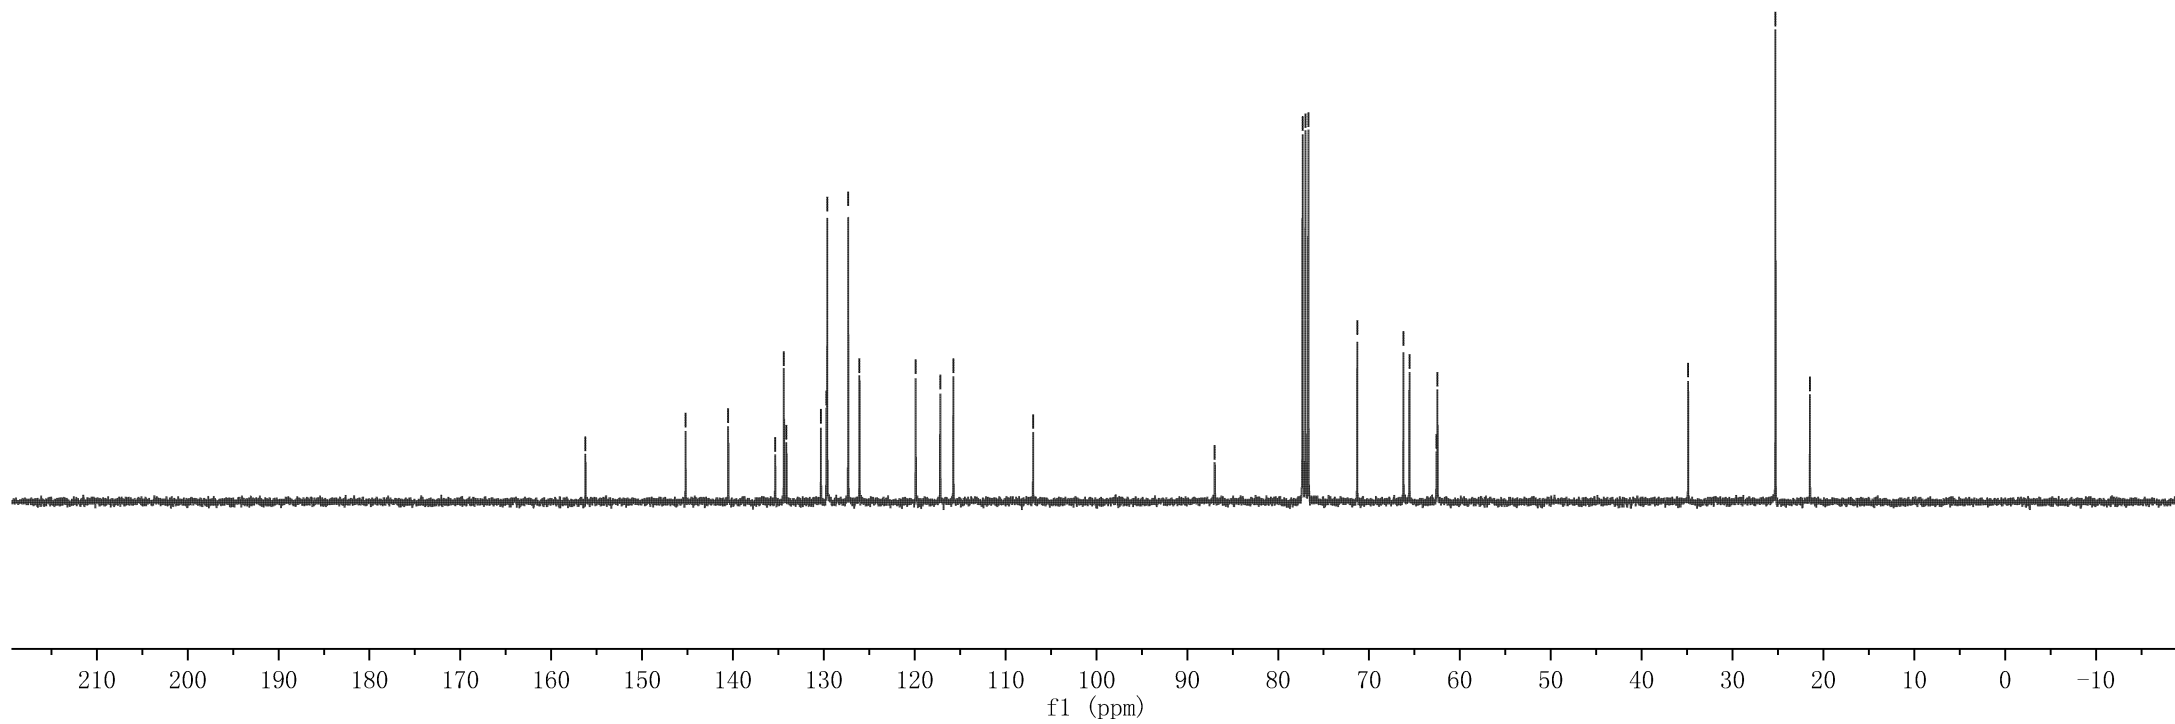

7.991  
7.969  
7.906  
7.886  
7.689  
7.430  
7.408  
7.260  
7.173  
7.152

5.956  
5.942  
5.929  
5.915  
5.900  
5.886  
5.874  
5.860

5.308  
5.265  
5.193  
5.167  
4.985

4.455  
4.432  
4.410  
4.277  
4.264  
4.254  
4.241

4.054  
4.040  
3.900  
3.887  
3.878  
3.866

2.294

1.084

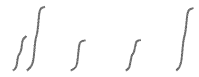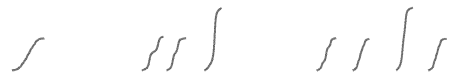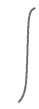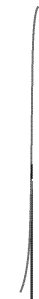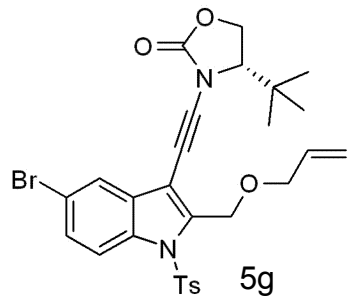

1.09  
2.02  
0.95

0.97  
1.98

1.01

1.07  
1.02  
1.99

1.03  
1.00  
2.00  
1.01

3.00

9.09

9.0 8.5 8.0 7.5 7.0 6.5 6.0 5.5 5.0 4.5 4.0 3.5 3.0 2.5 2.0 1.5 1.0 0.5 0.0 -0.5 -1.0

f1 (ppm)

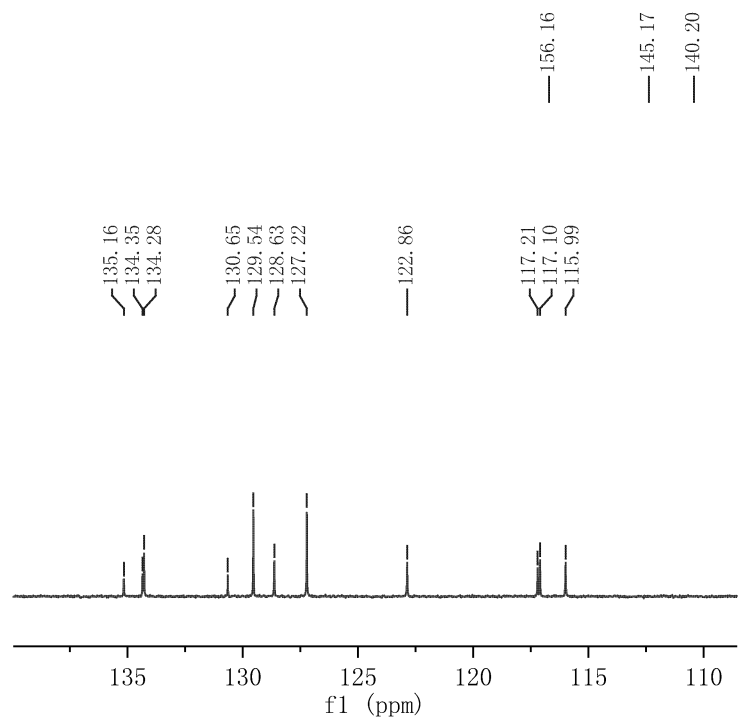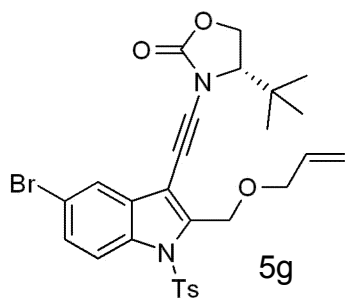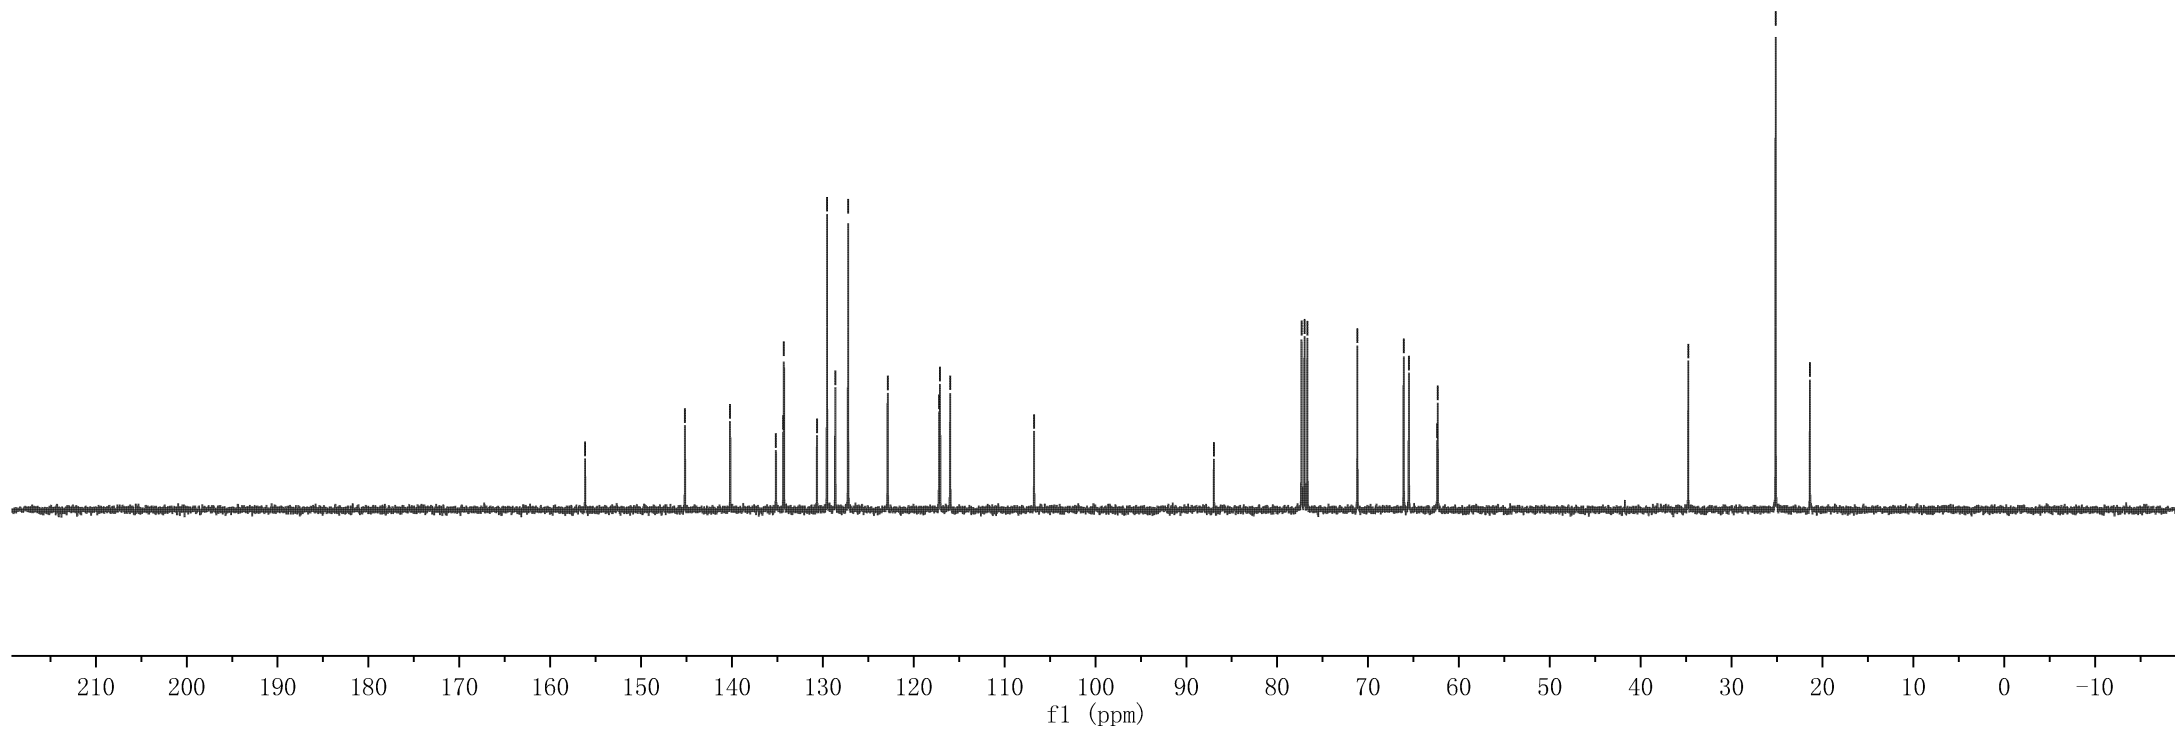

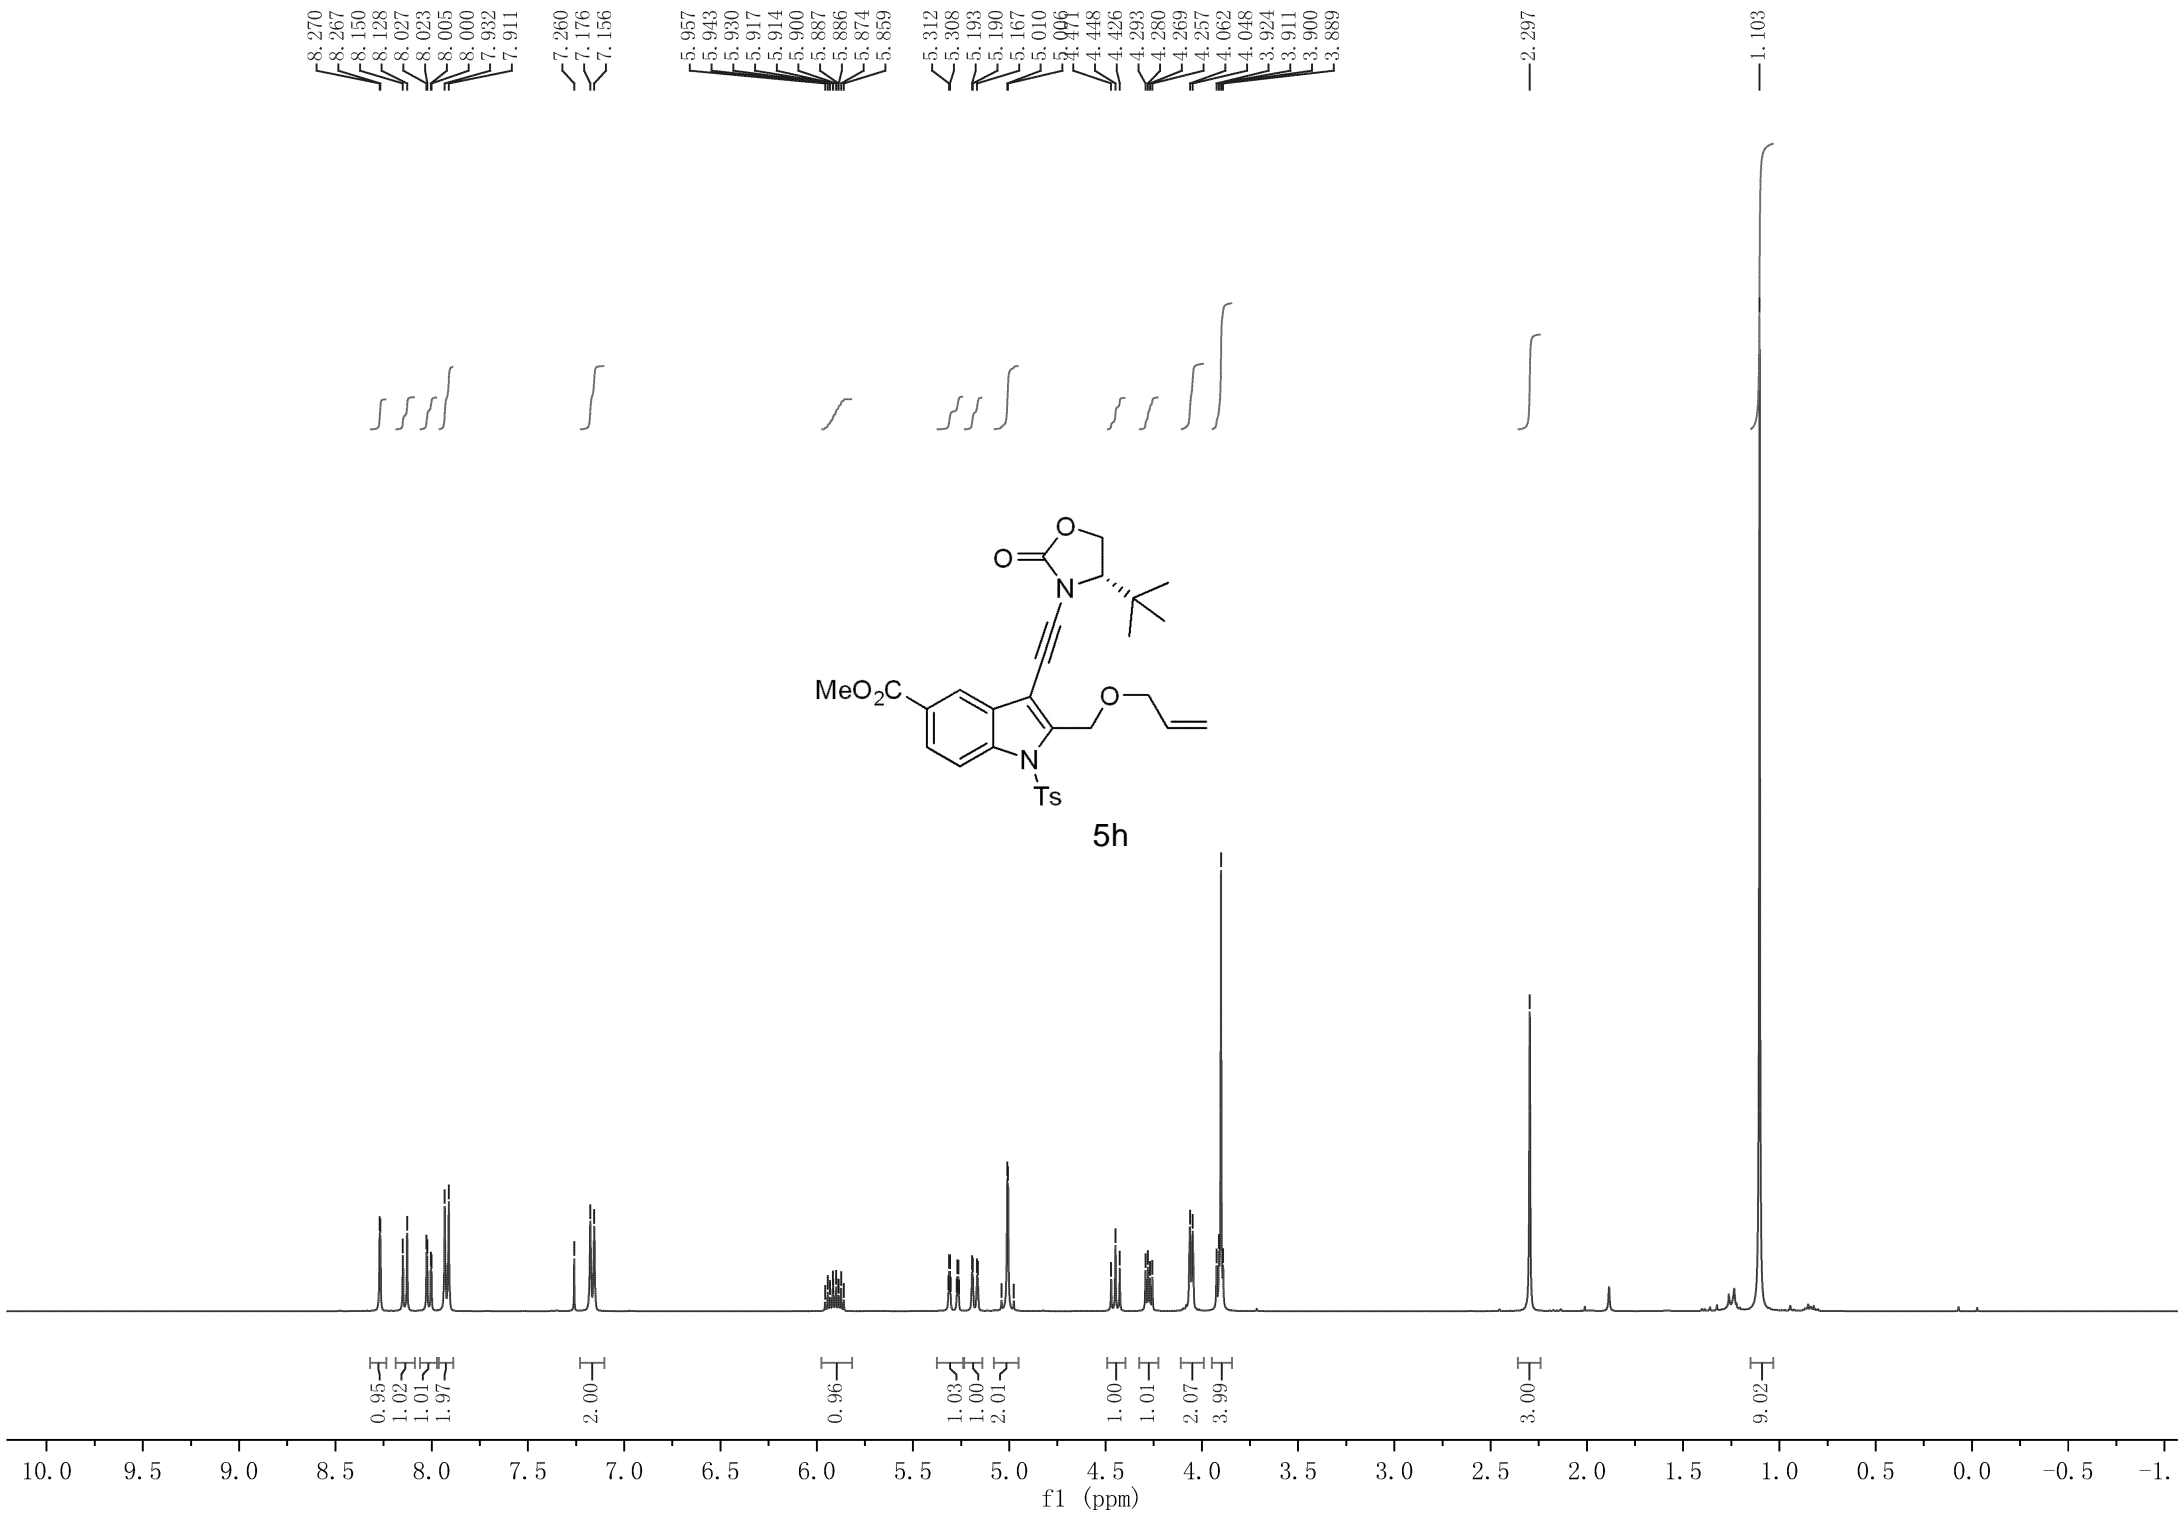

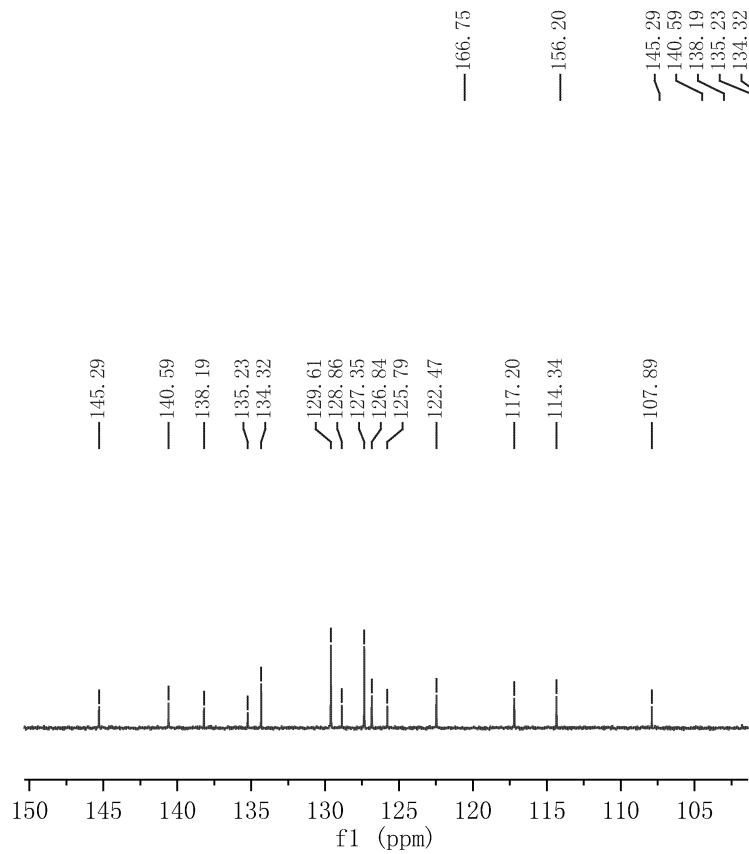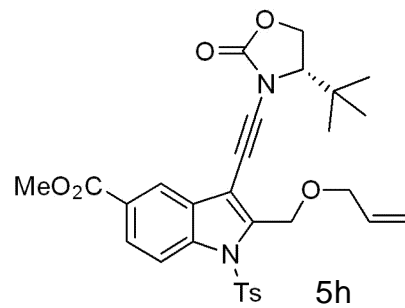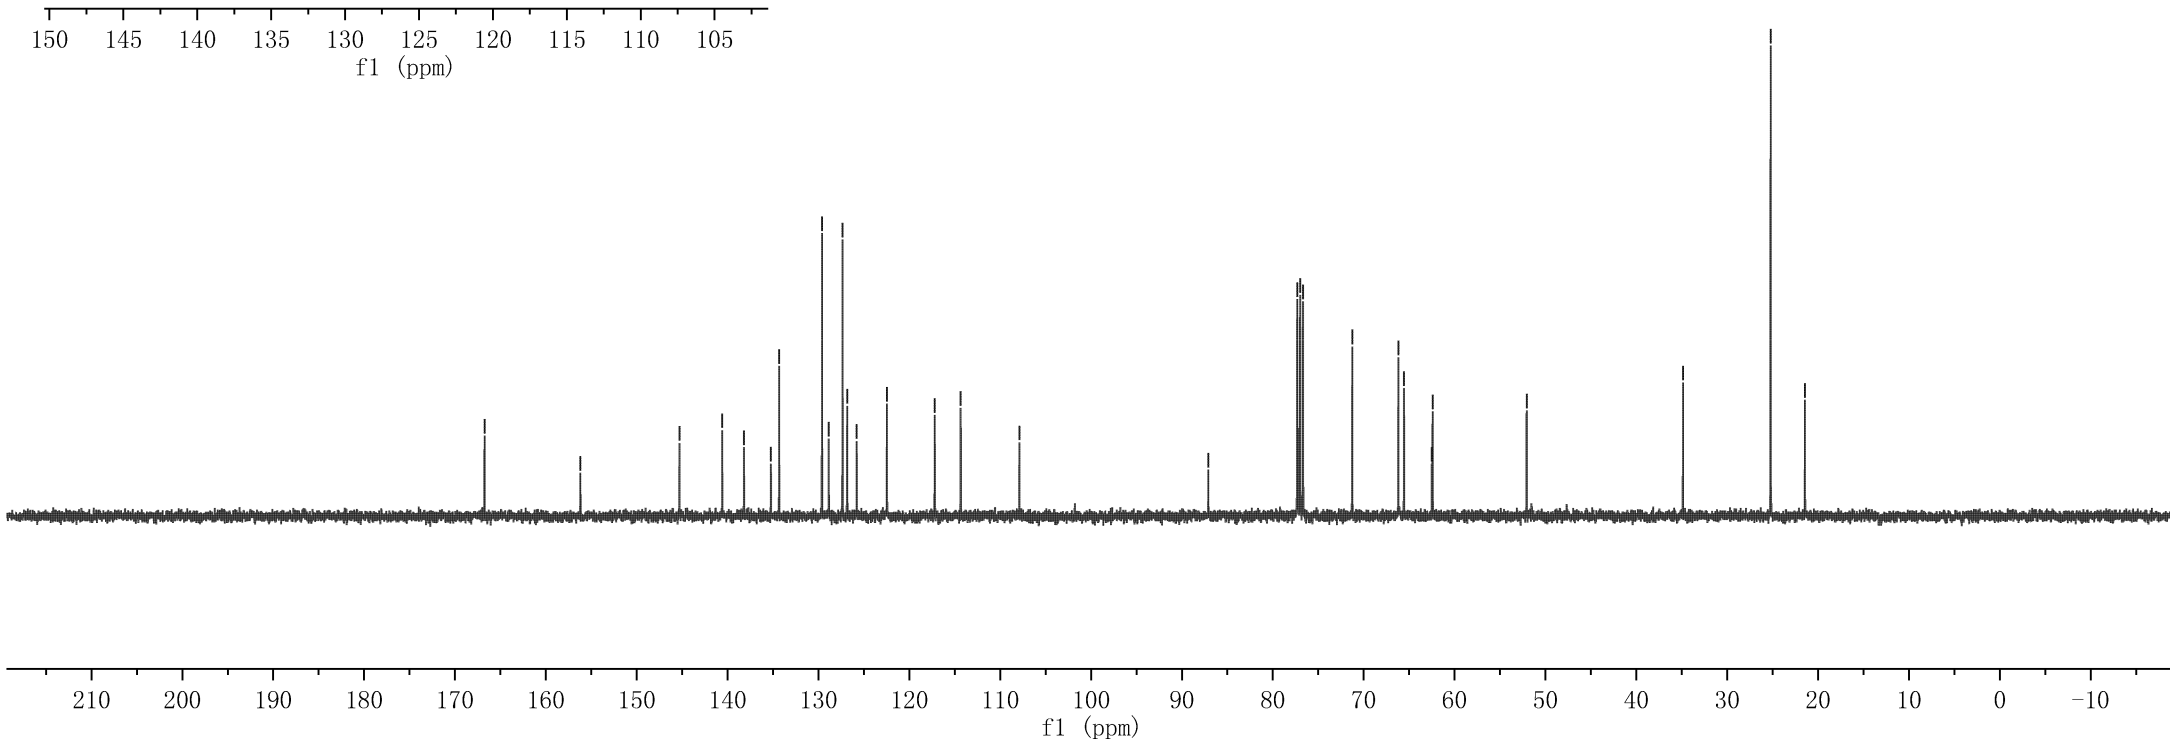



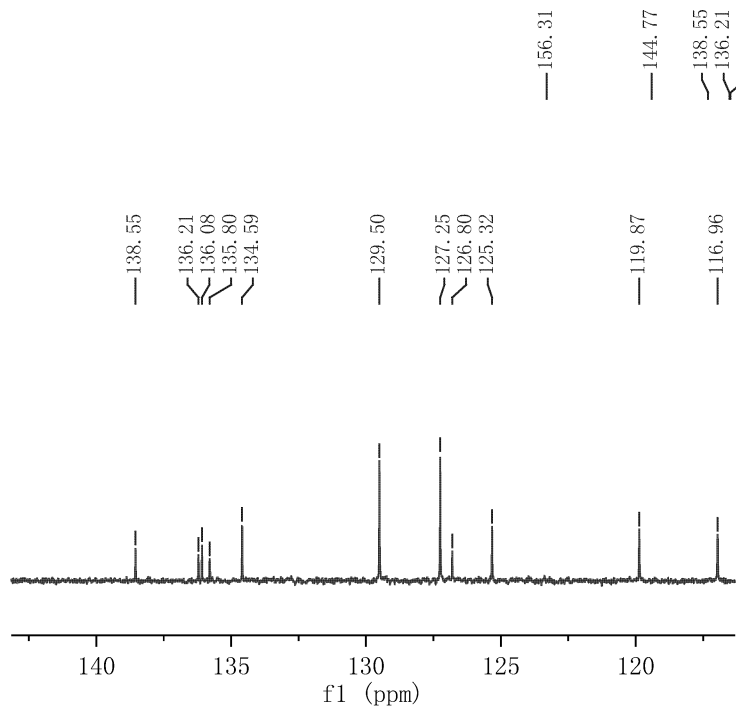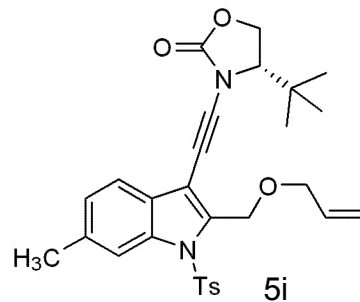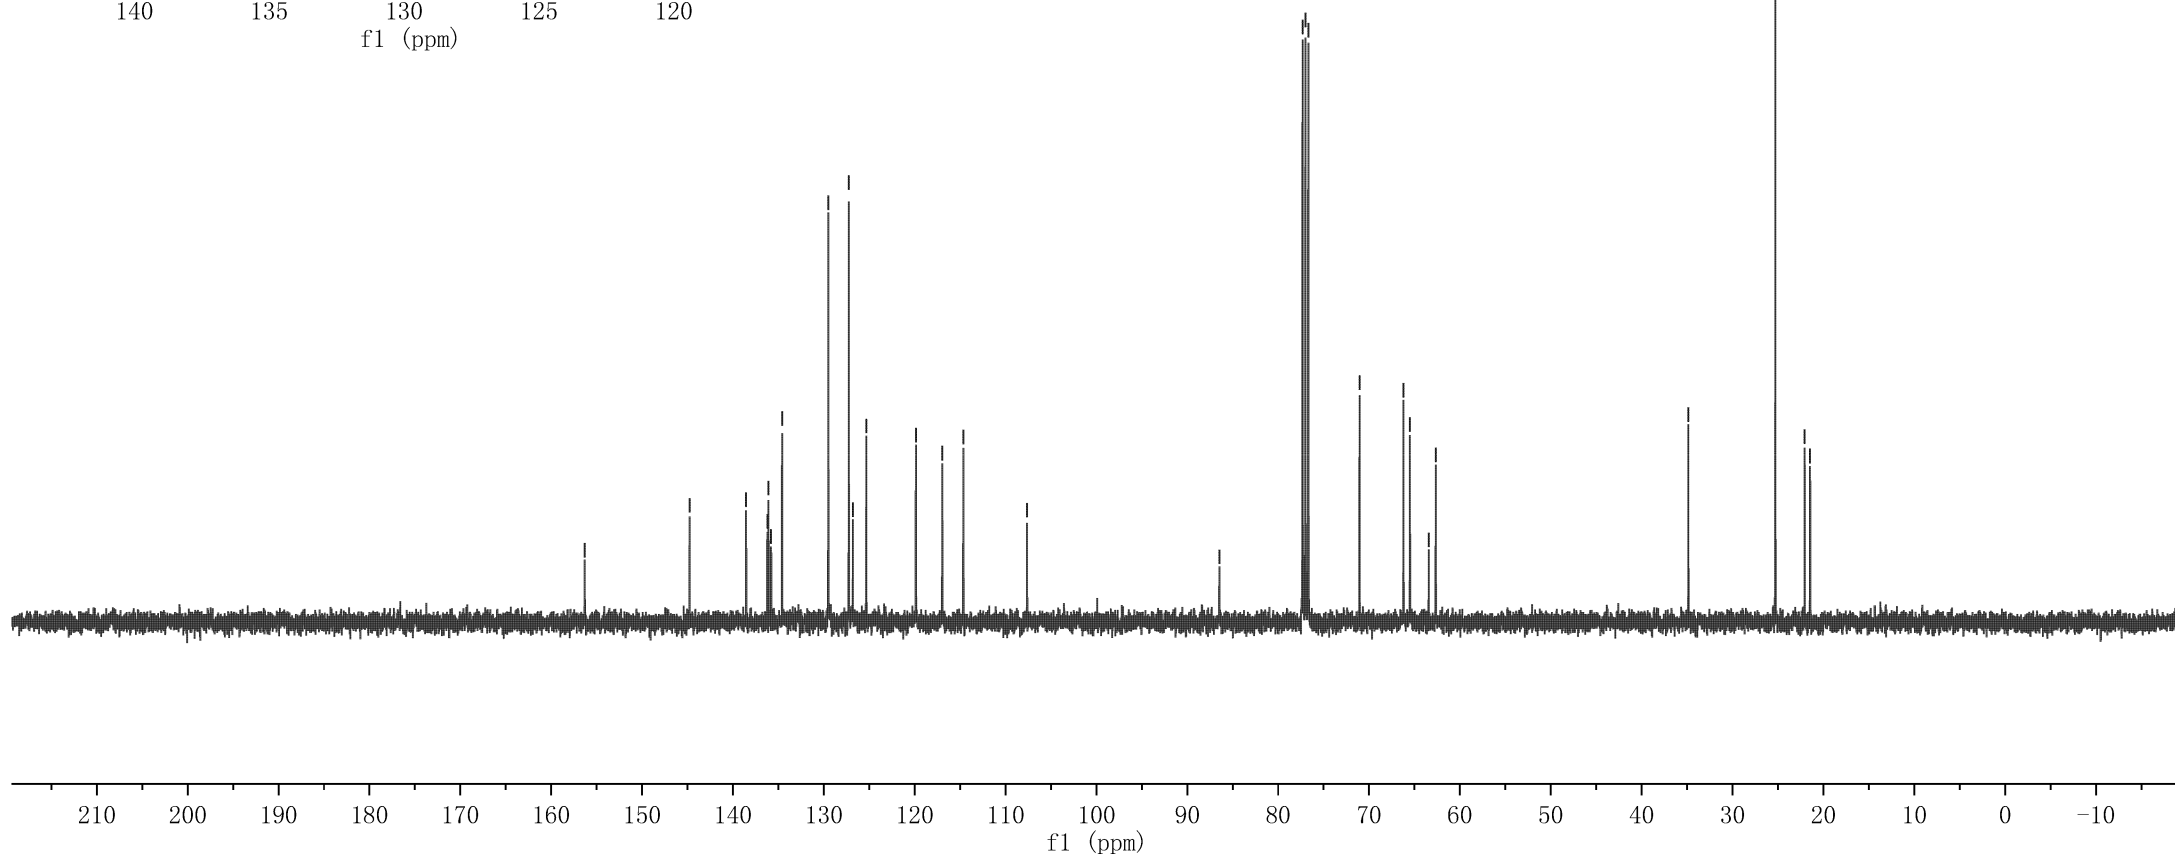



8.131  
8.110  
7.945  
7.924  
7.589  
7.570  
7.385  
7.382  
7.364  
7.346  
7.343  
7.298  
7.280  
7.260  
7.191  
7.171

5.964  
5.938  
5.921  
5.895  
5.337  
5.333  
5.294  
5.290  
5.225  
5.221  
5.199  
5.195  
5.014

3.334  
3.137

2.332

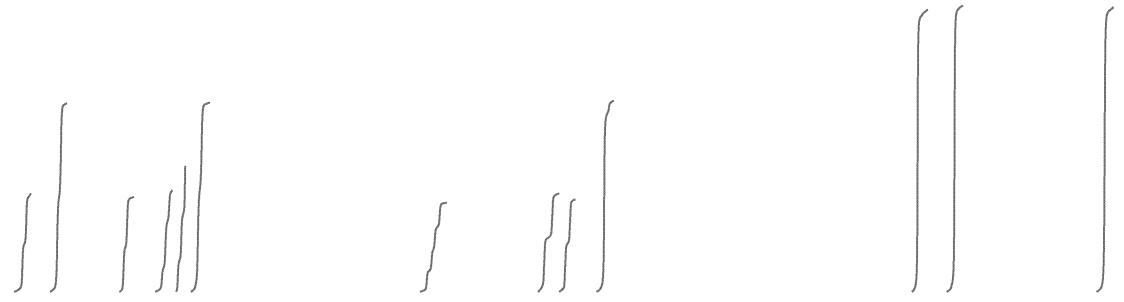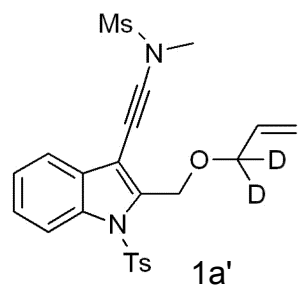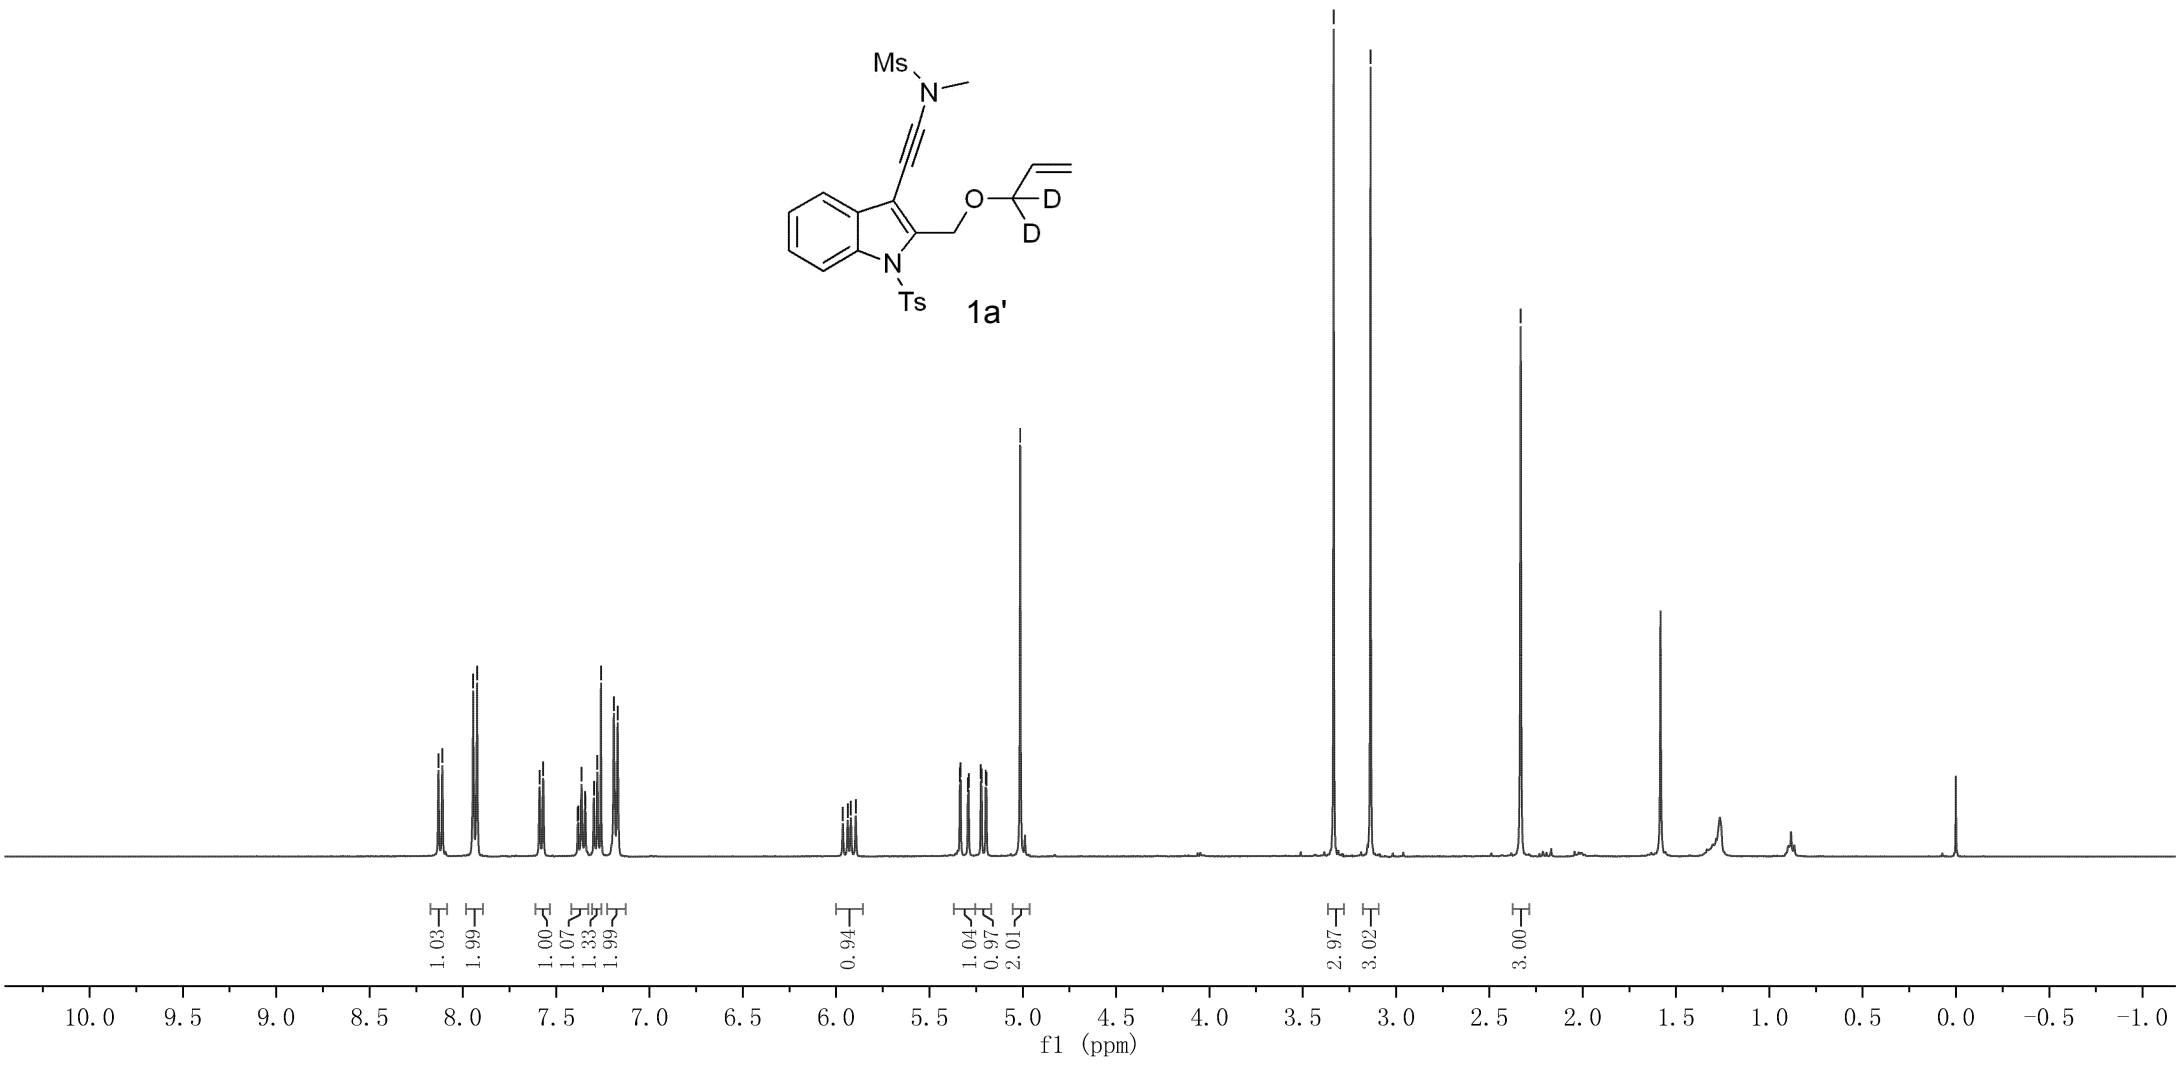

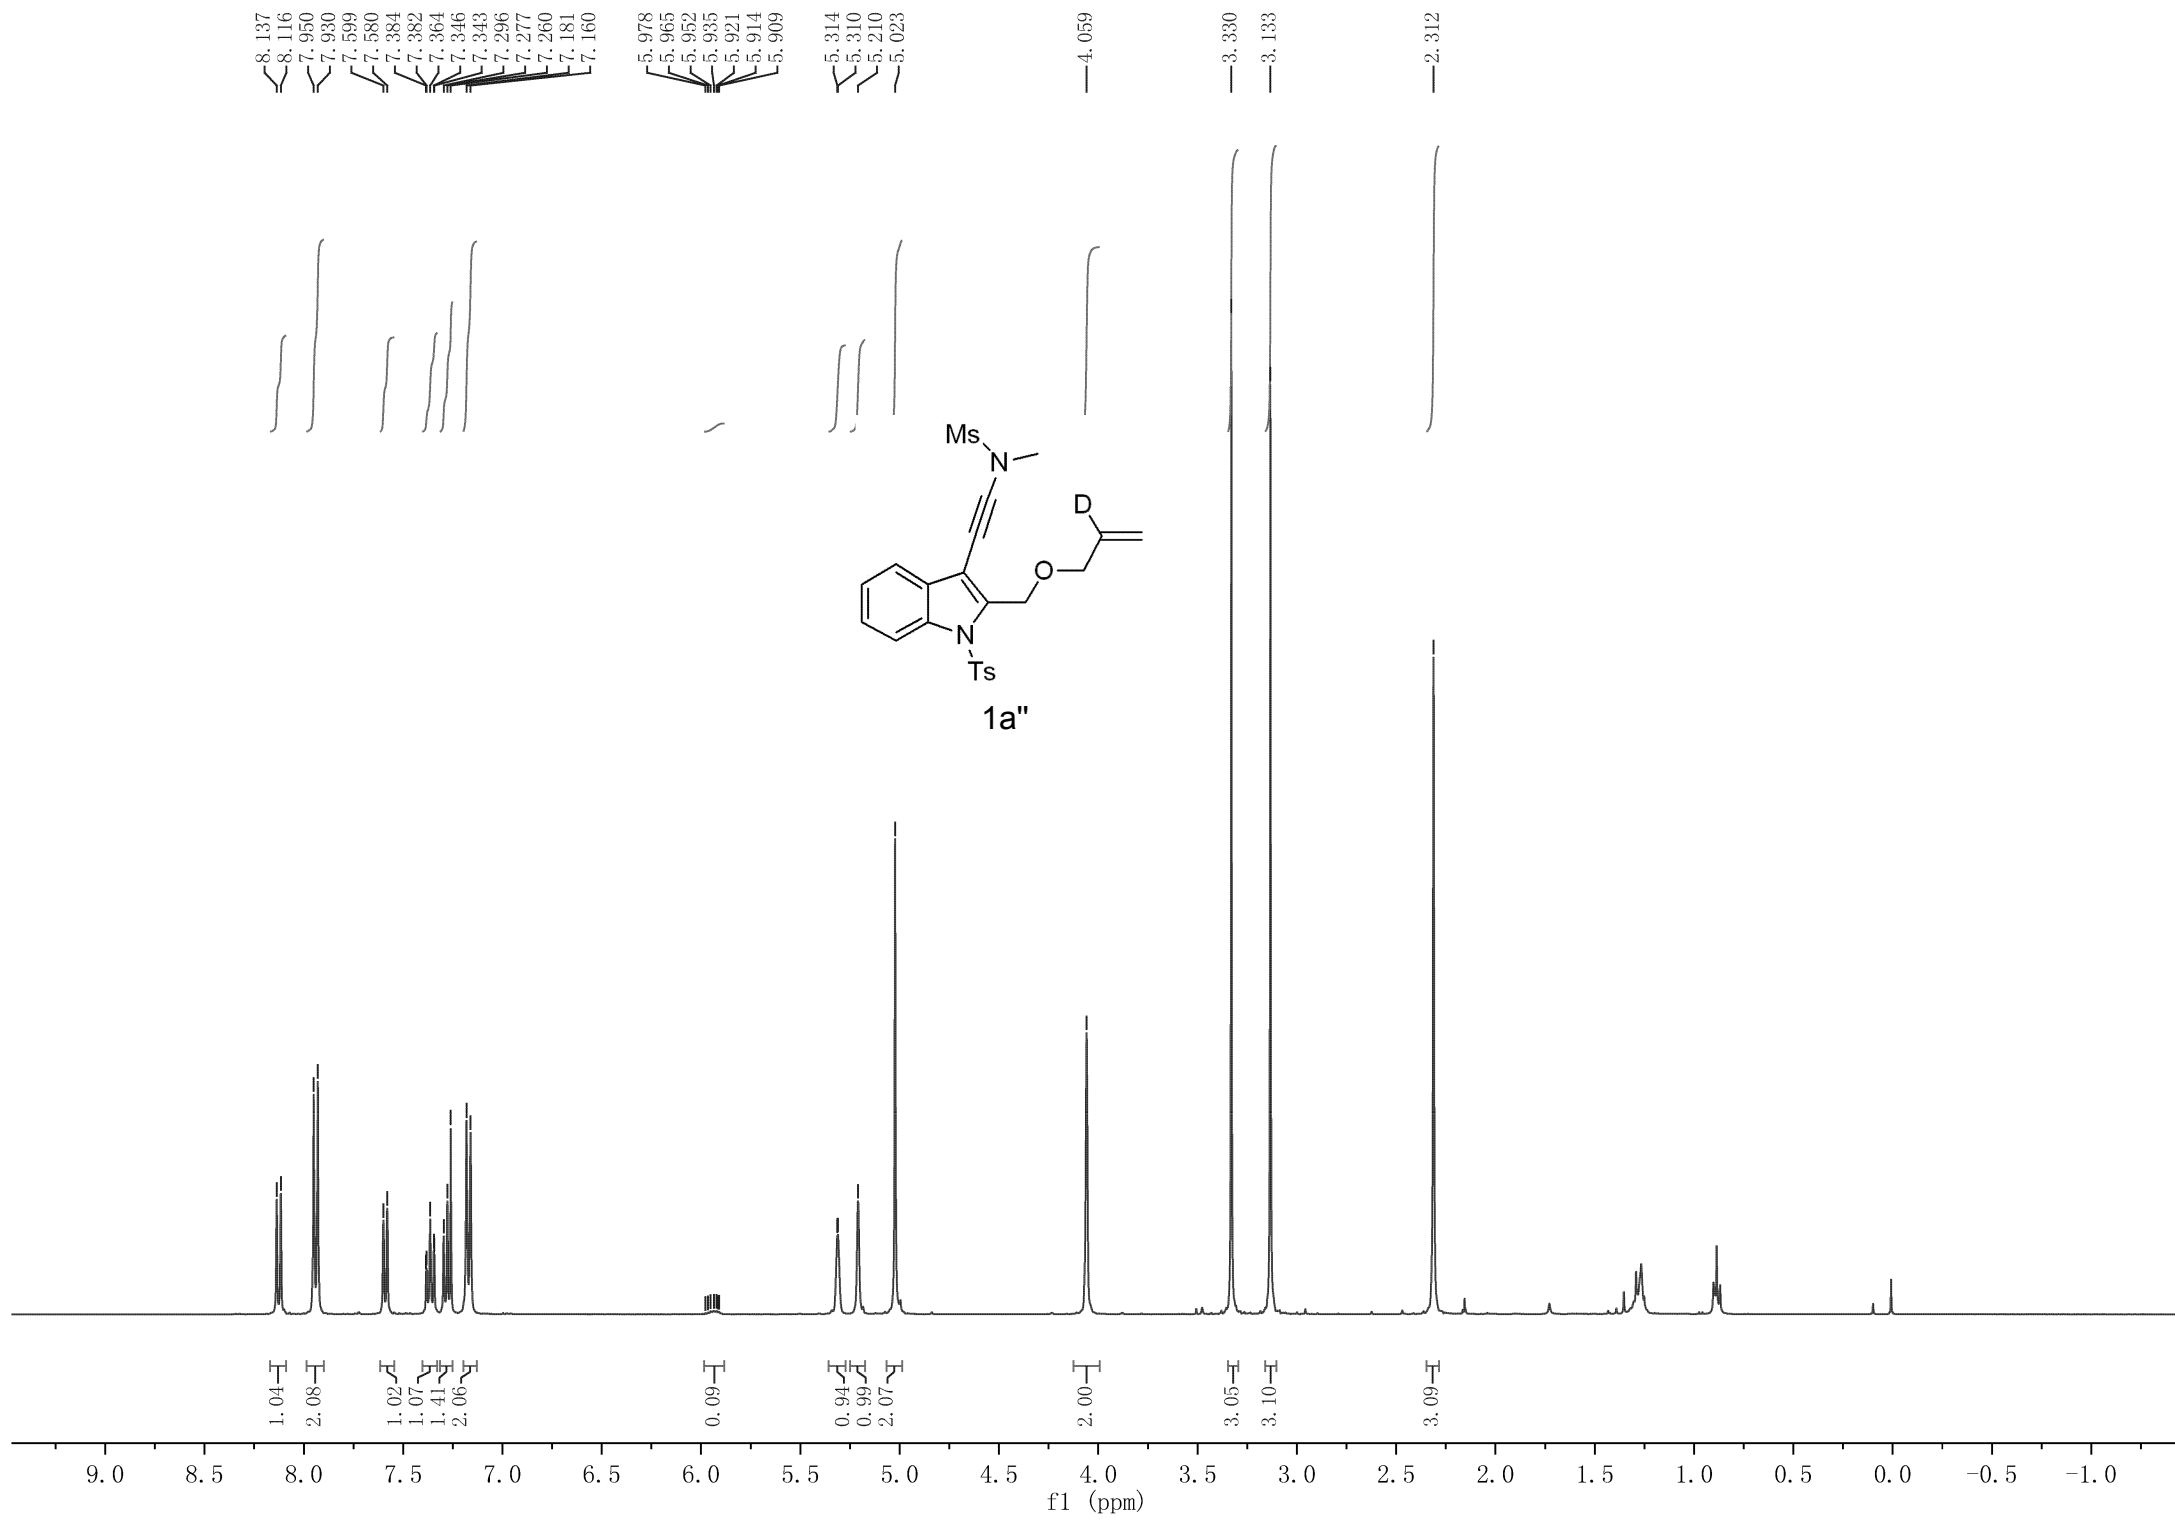

8.242  
8.222  
7.555  
7.534  
7.459  
7.441  
7.439  
7.335  
7.332  
7.317  
7.314  
7.297  
7.293  
7.289  
7.286  
7.270  
7.267  
7.255  
7.252  
7.249  
7.179  
7.158

5.103  
5.085  
5.067

3.972  
3.961  
3.951  
3.929  
3.918  
3.908  
3.851  
3.831

2.895  
2.876  
2.864  
2.833  
2.716  
2.706  
2.697  
2.686  
2.407  
2.385  
2.370  
2.344  
2.314  
1.852  
1.838  
1.817  
1.808  
1.802  
1.781  
1.771

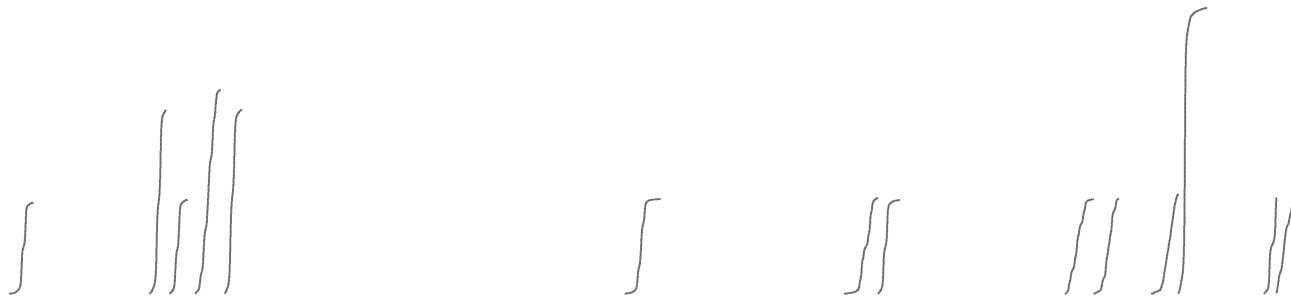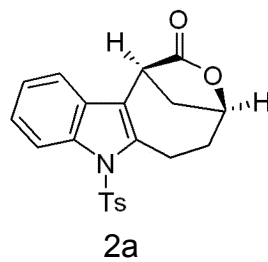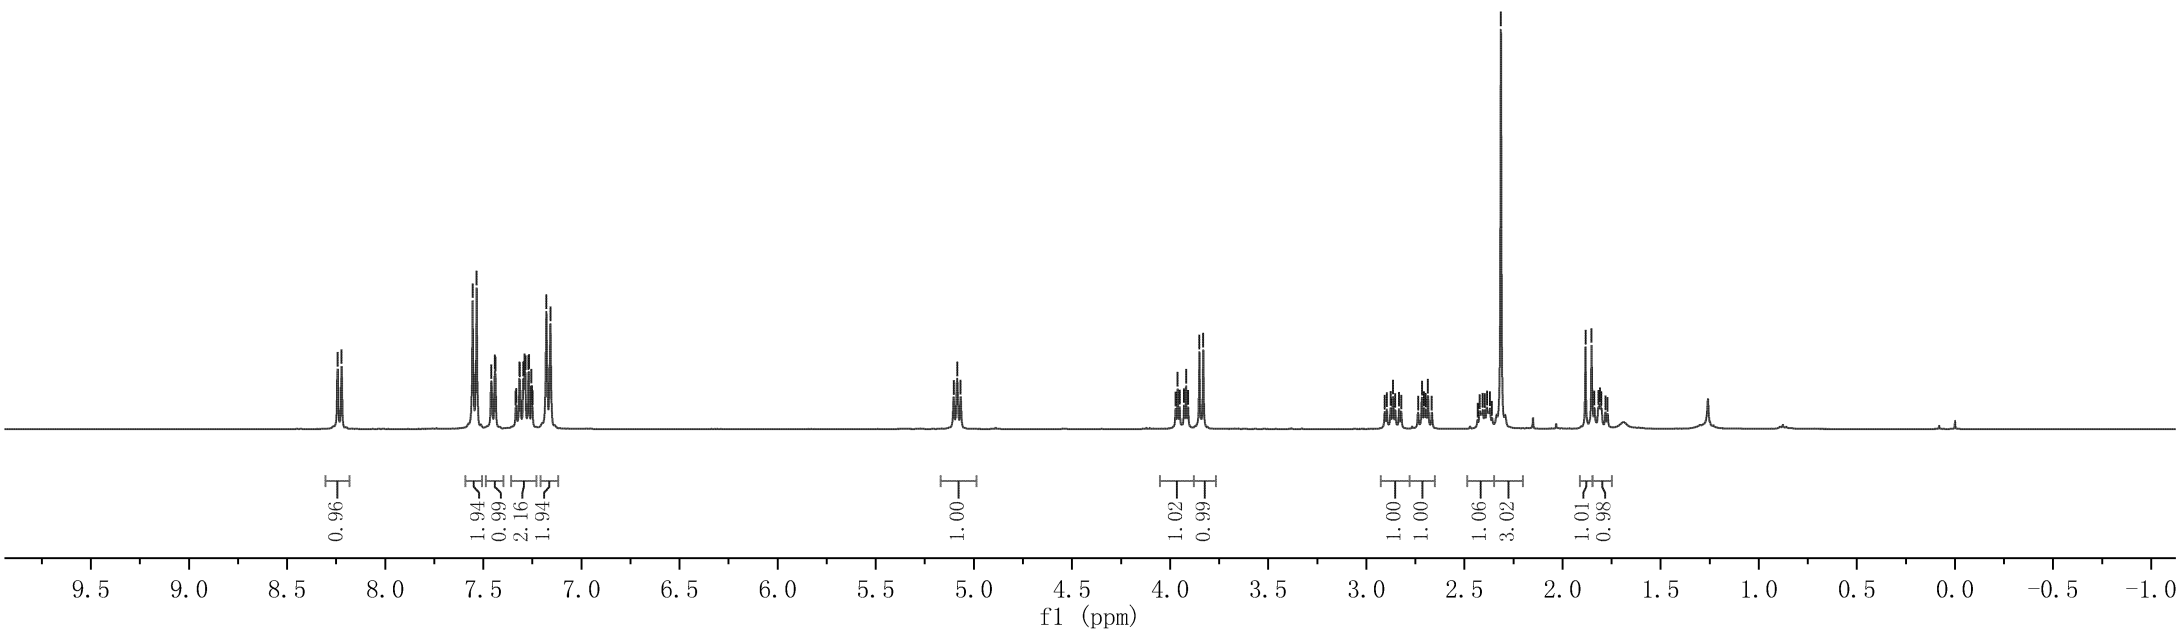

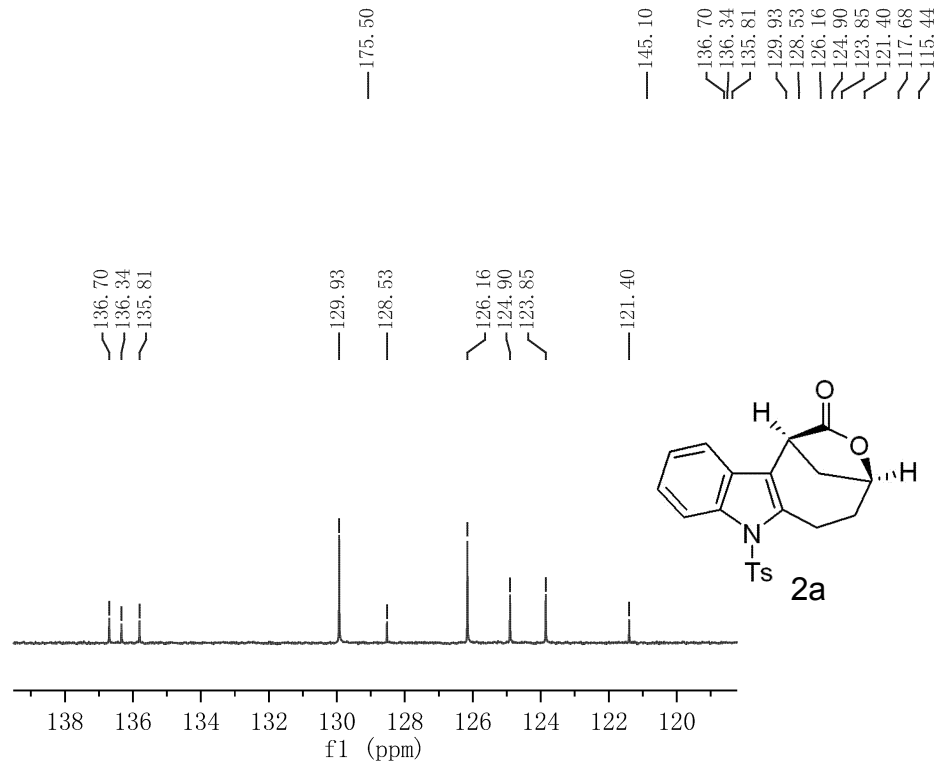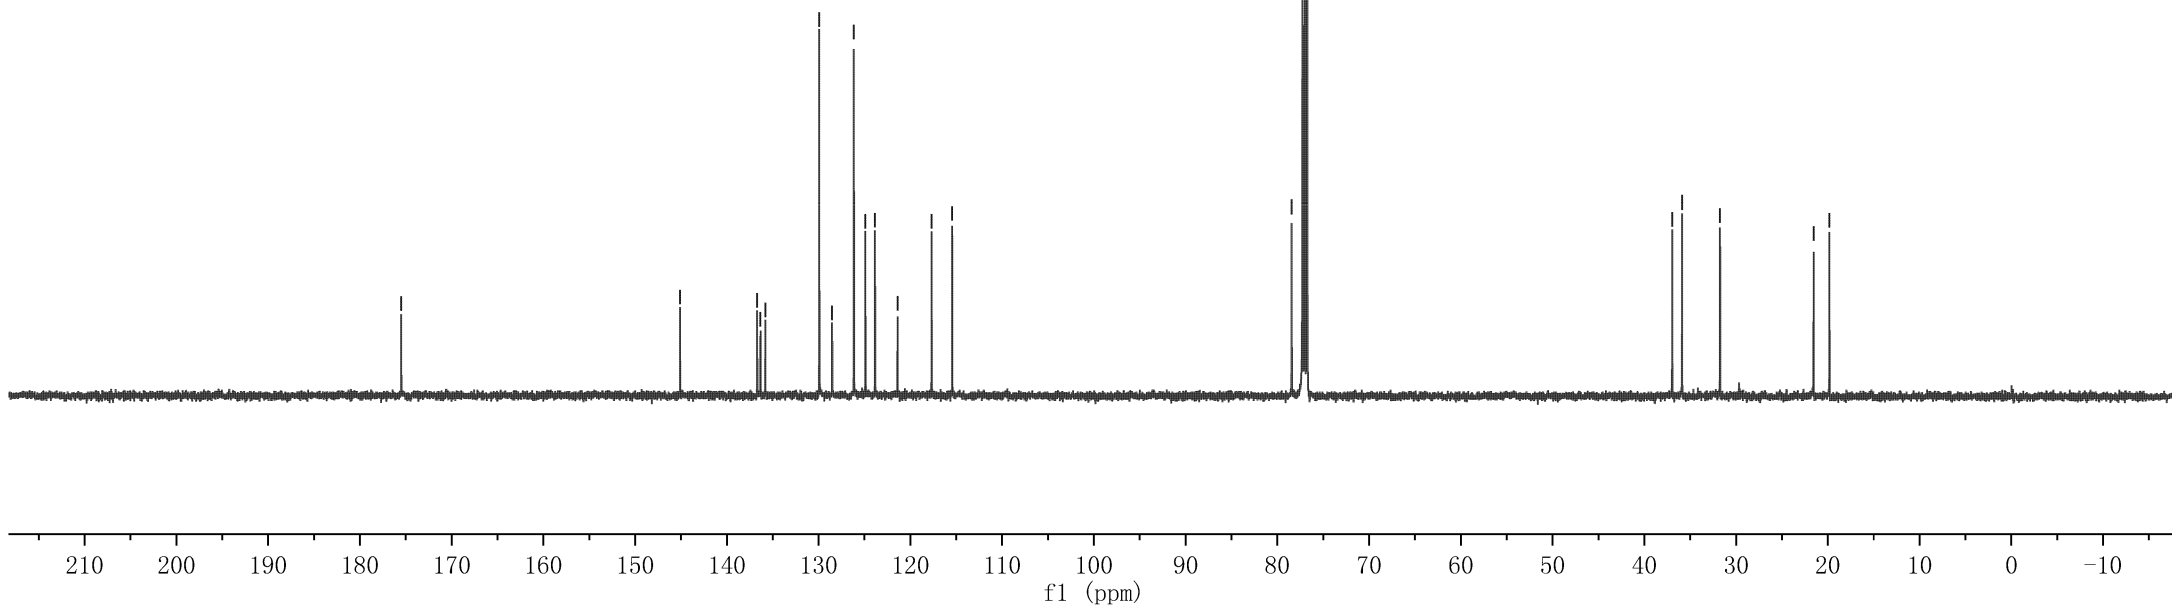

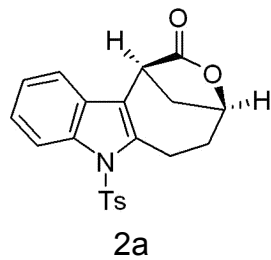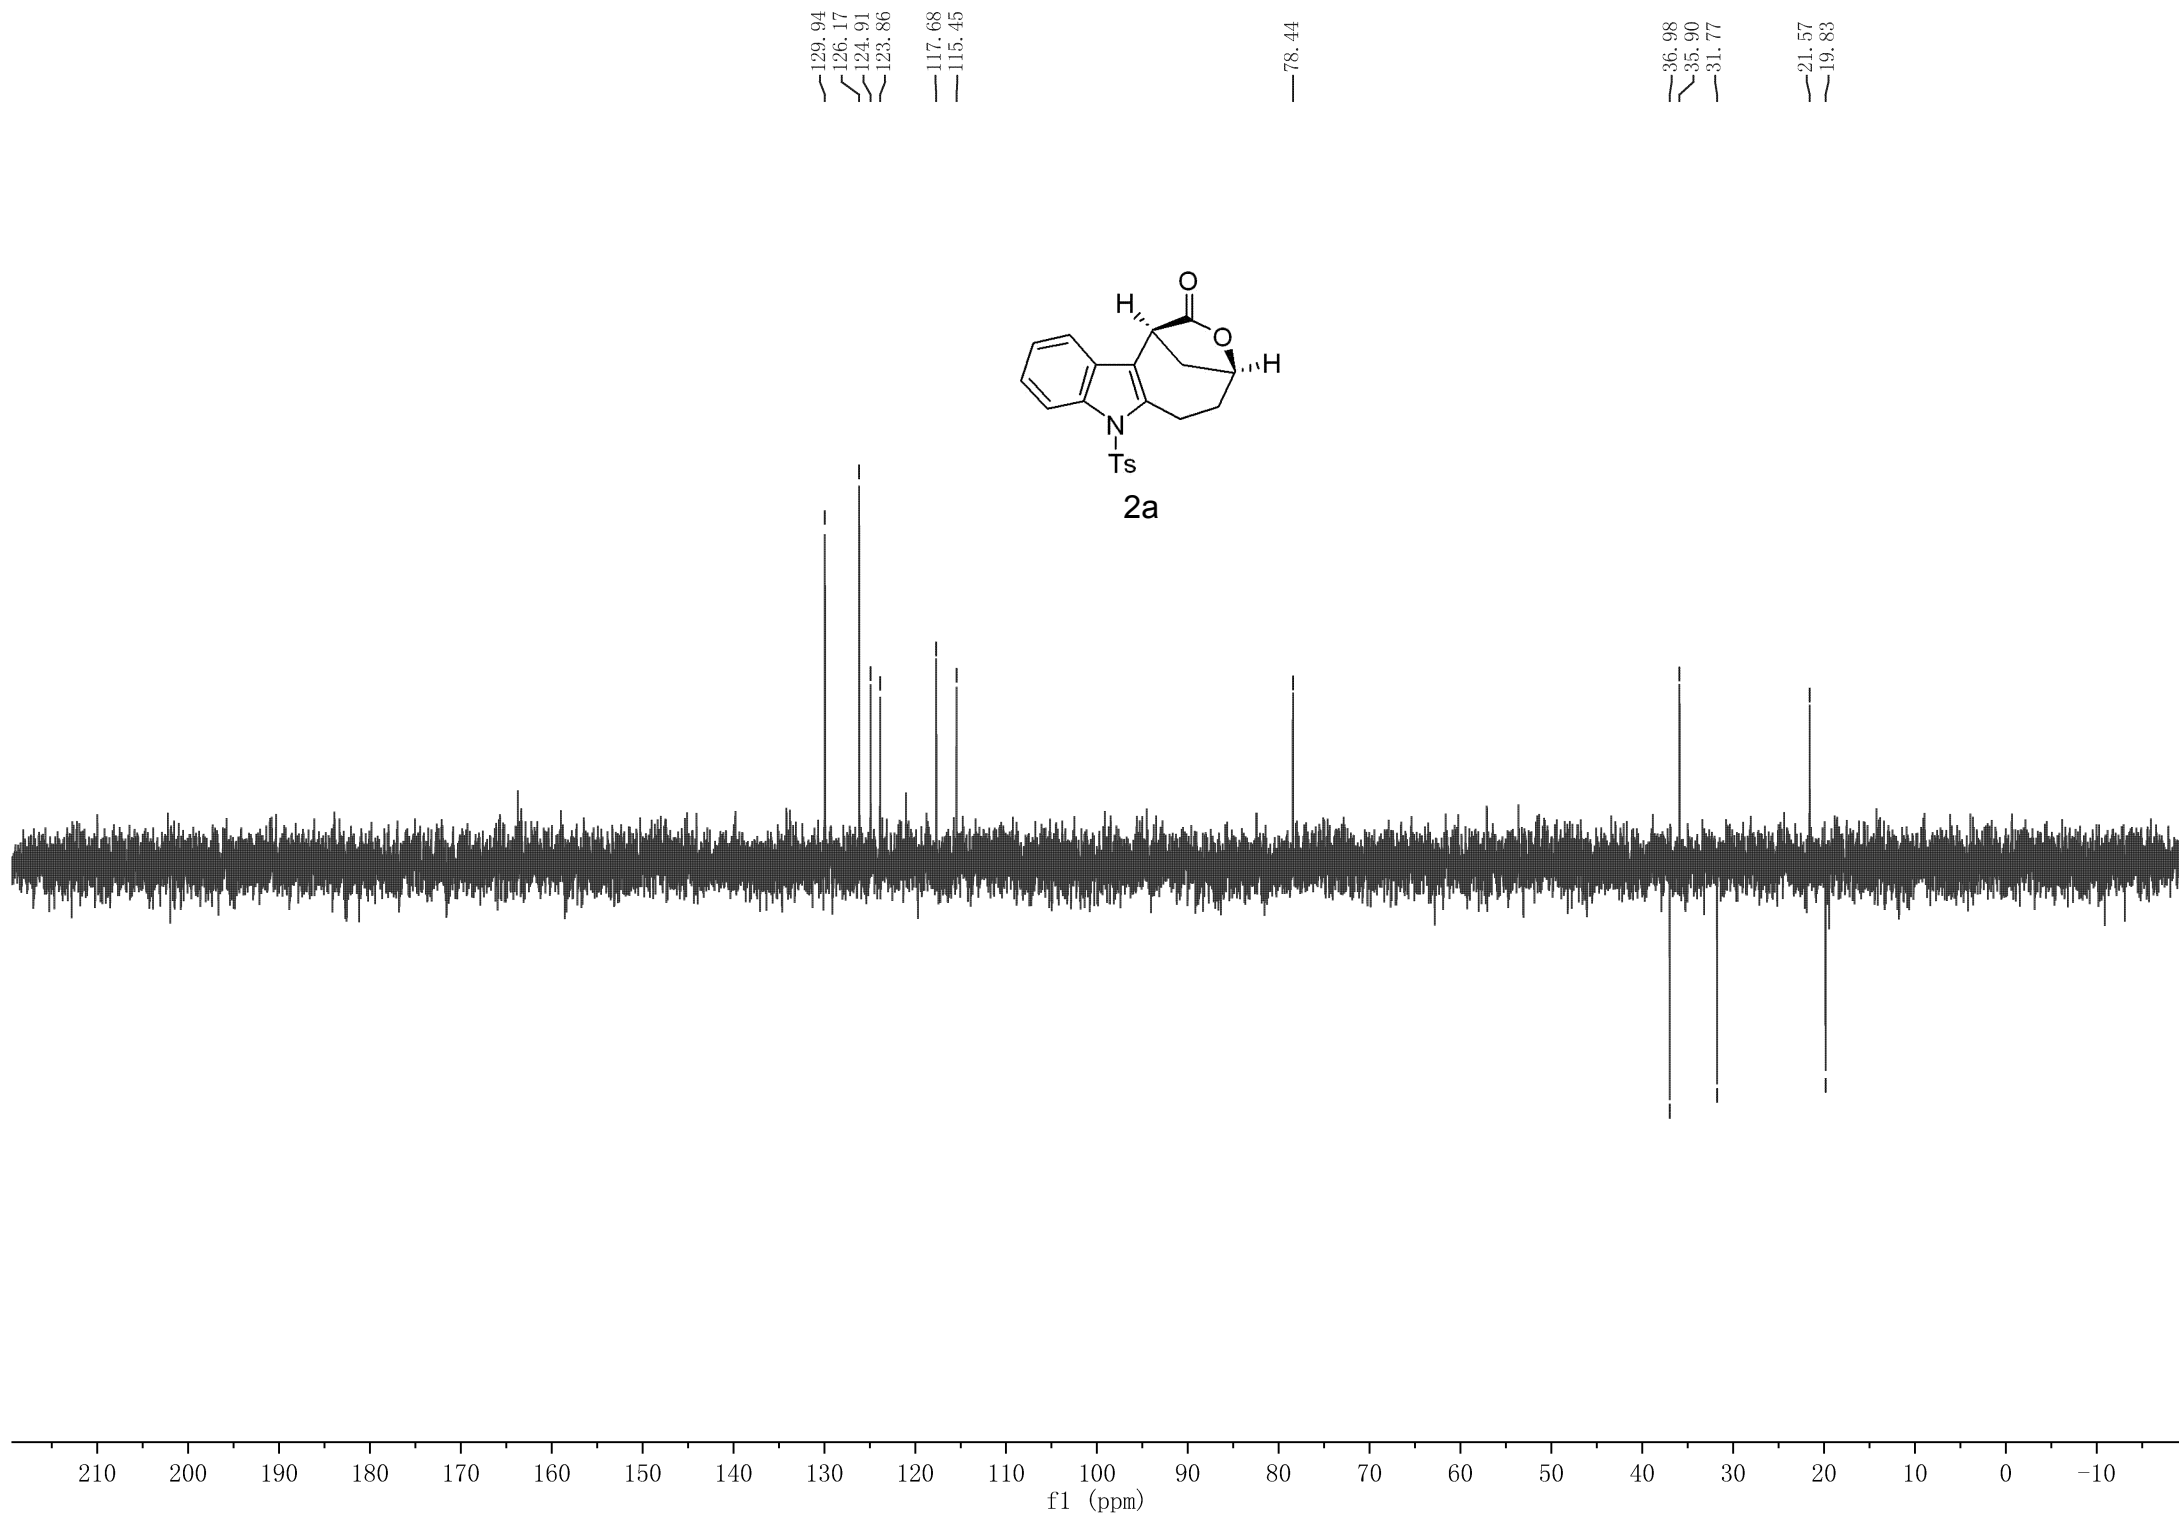

8.120  
8.100  
7.654  
7.633  
7.429  
7.410  
7.401  
7.380  
7.361  
7.315  
7.313  
7.296  
7.260  
7.236  
7.216  
5.802  
5.796  
5.760  
5.755  
5.722  
5.717  
5.680  
5.675  
5.526  
5.501  
5.483  
5.458  
4.892  
4.850  
4.847  
4.047  
4.040  
4.034  
4.029  
4.022  
2.912  
2.896  
2.879  
2.862  
2.847  
2.725  
2.709  
2.693  
2.675  
2.660  
2.352

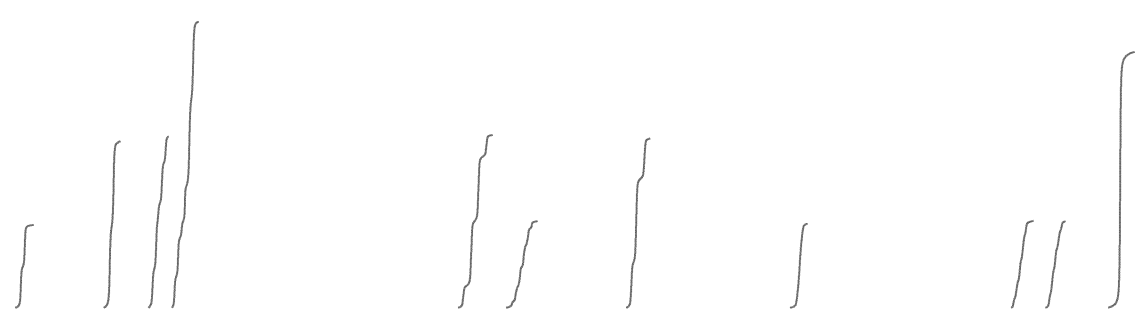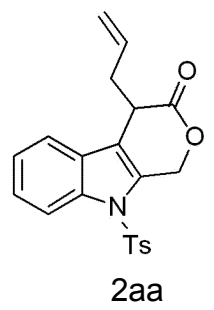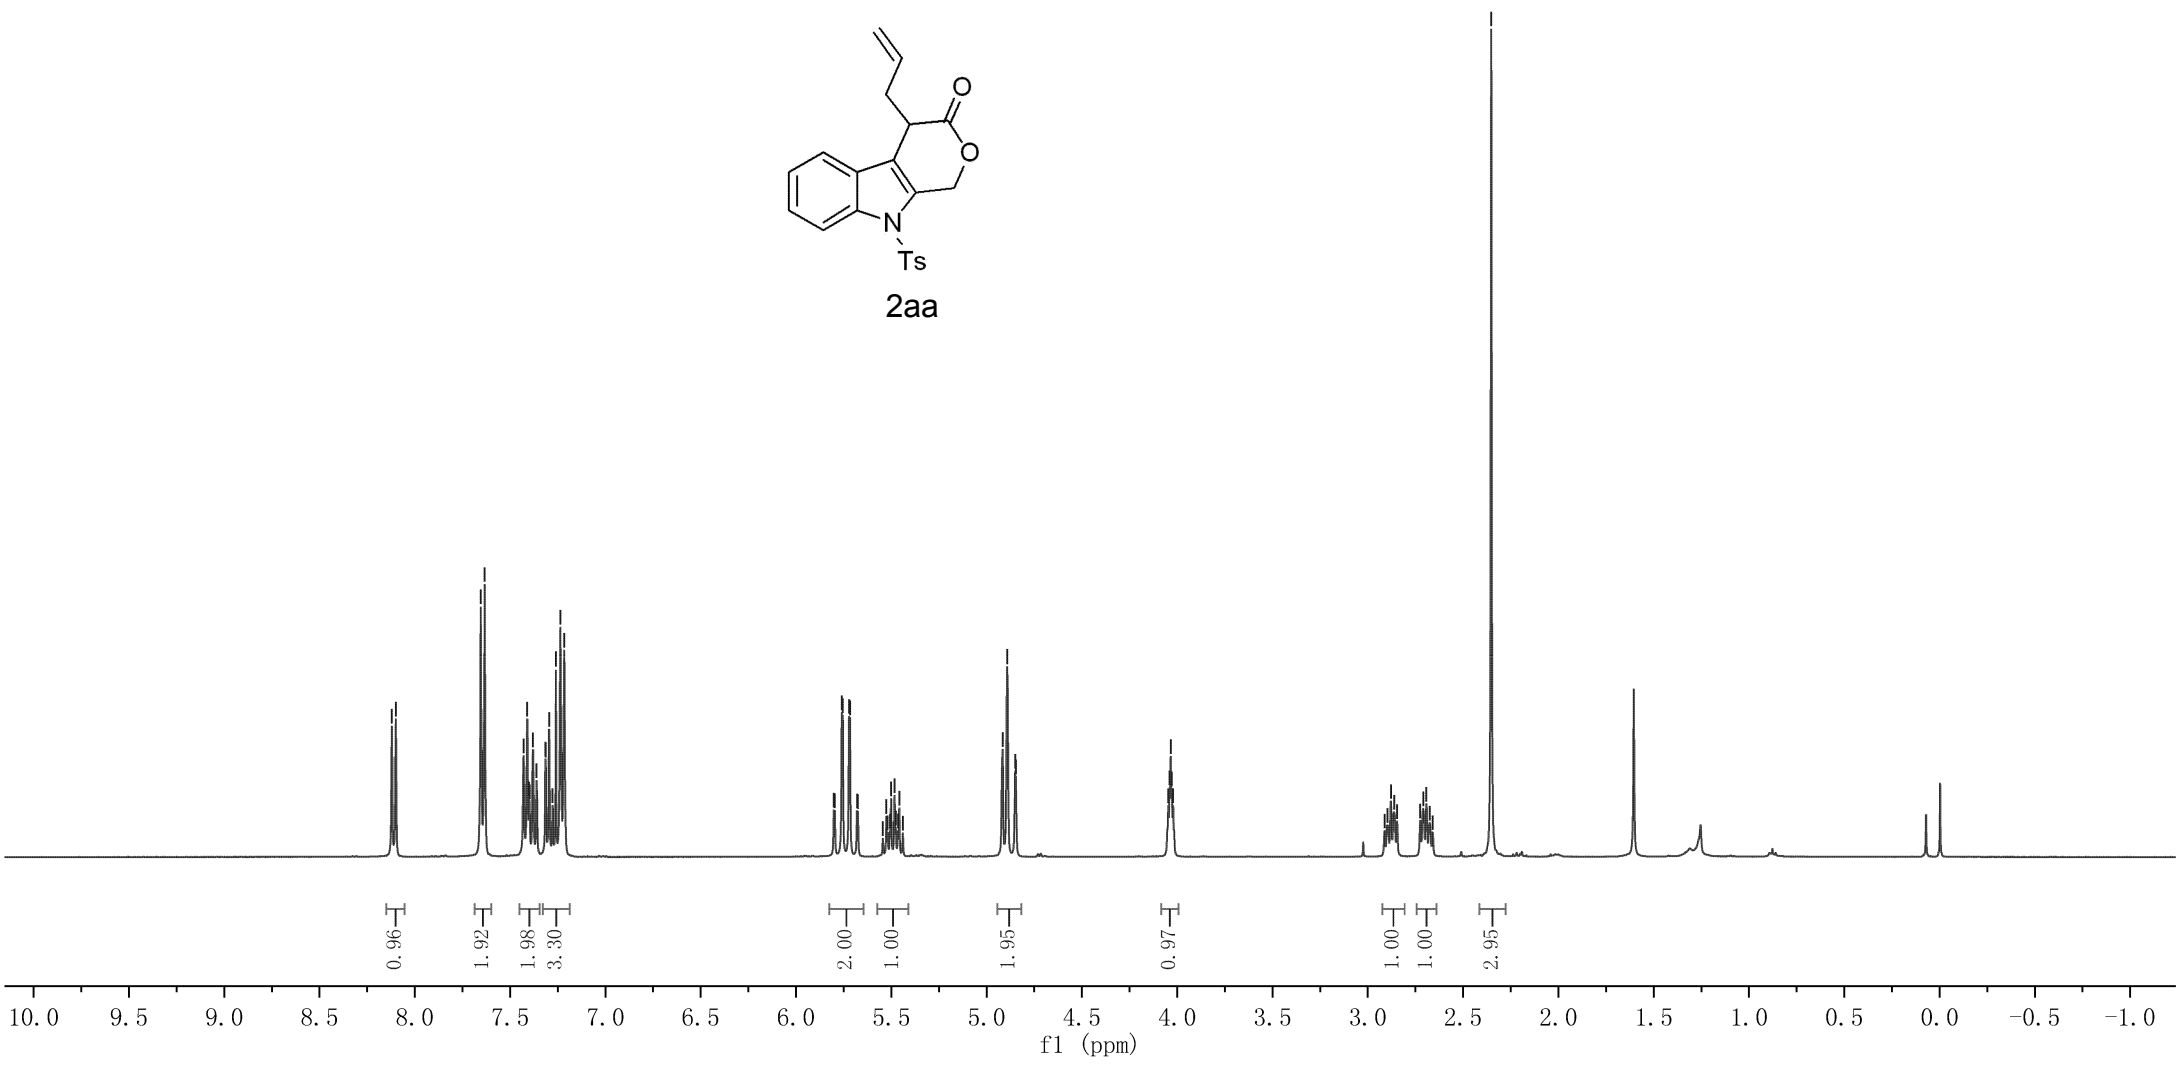

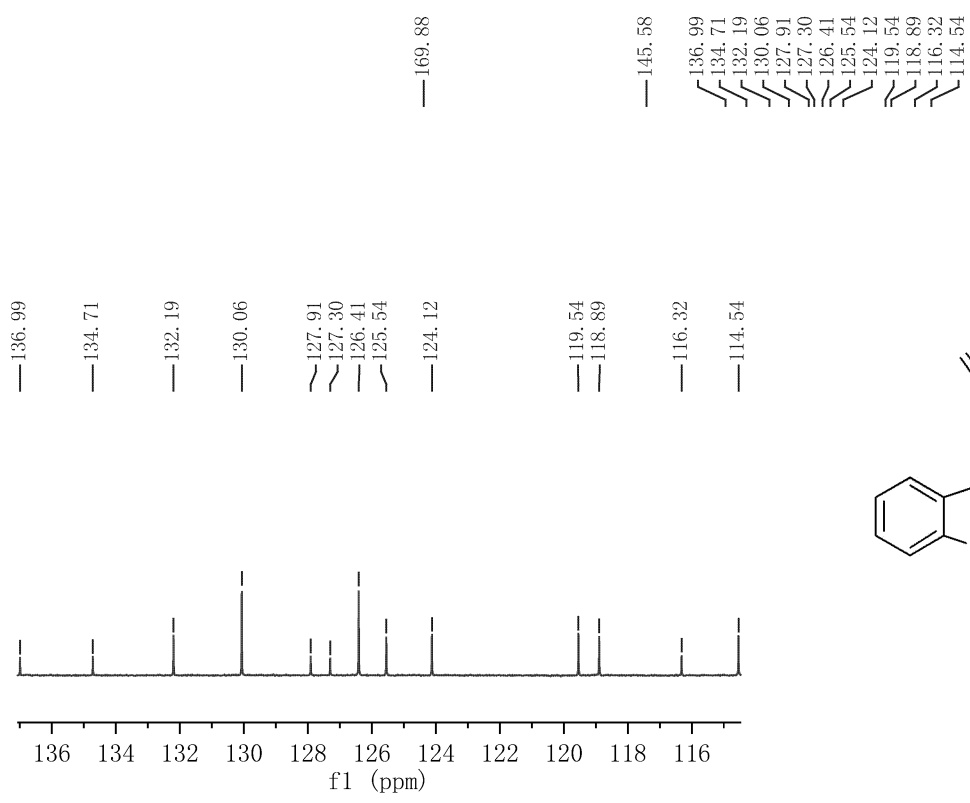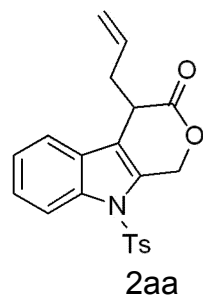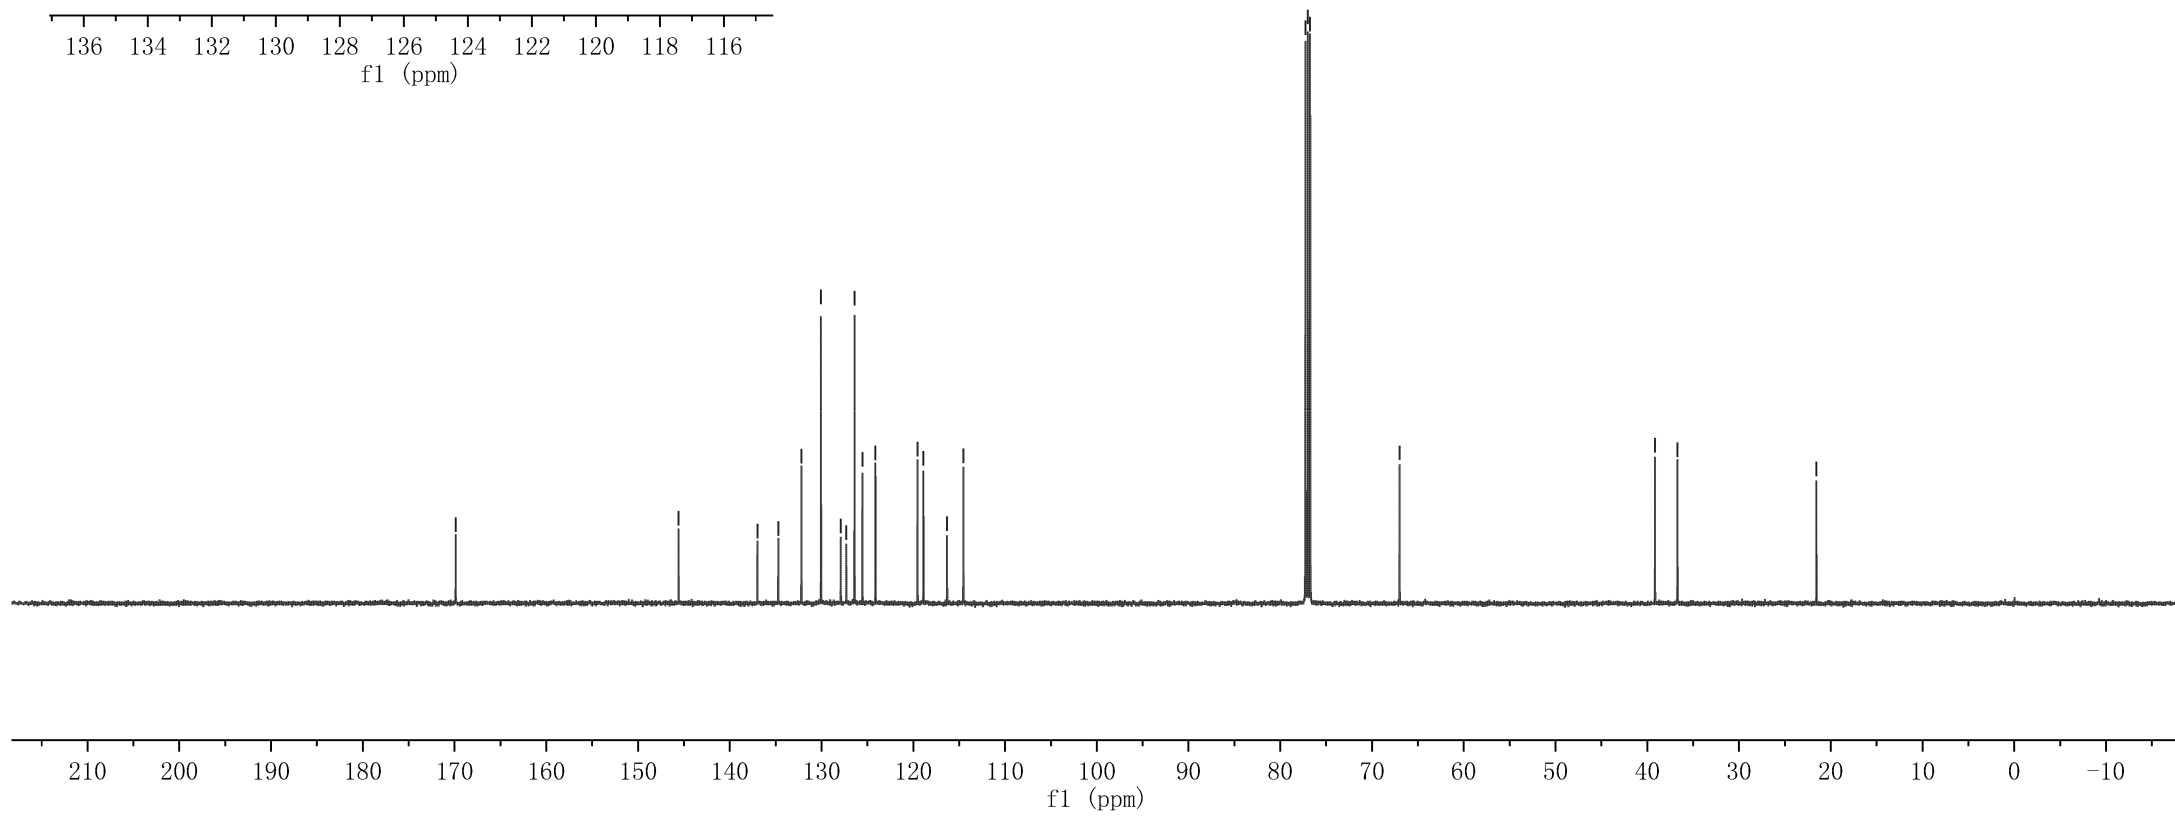

132.19  
130.06  
126.40  
125.54  
124.12  
119.54  
118.90  
114.53

67.00

39.15  
36.70

21.56

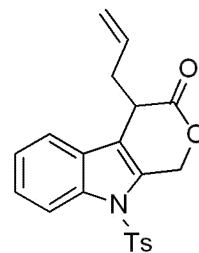

2aa

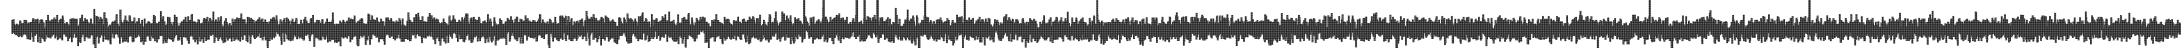

210 200 190 180 170 160 150 140 130 120 110 100 90 80 70 60 50 40 30 20 10 0 -10

f1 (ppm)



8.107  
8.086  
7.538  
7.534  
7.521  
7.517  
7.260  
7.240  
7.179  
7.159  
7.145  
7.142  
7.124  
7.121

5.113  
5.095  
5.077

3.964  
3.954  
3.943  
3.921  
3.911  
3.900  
3.830  
3.810  
2.885  
2.865  
2.854  
2.822  
2.724  
2.722  
2.713  
2.693  
2.691  
2.422  
2.404  
2.378  
1.888  
1.868  
1.855  
1.848  
1.826  
1.822  
1.820  
1.817  
1.815  
1.811  
1.792  
1.790  
1.780

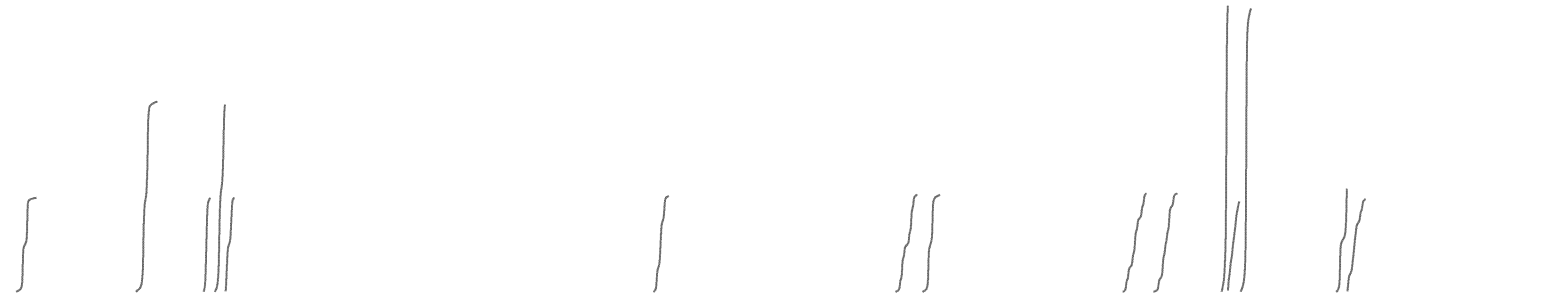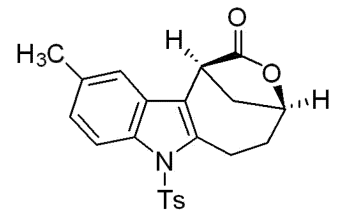

2b

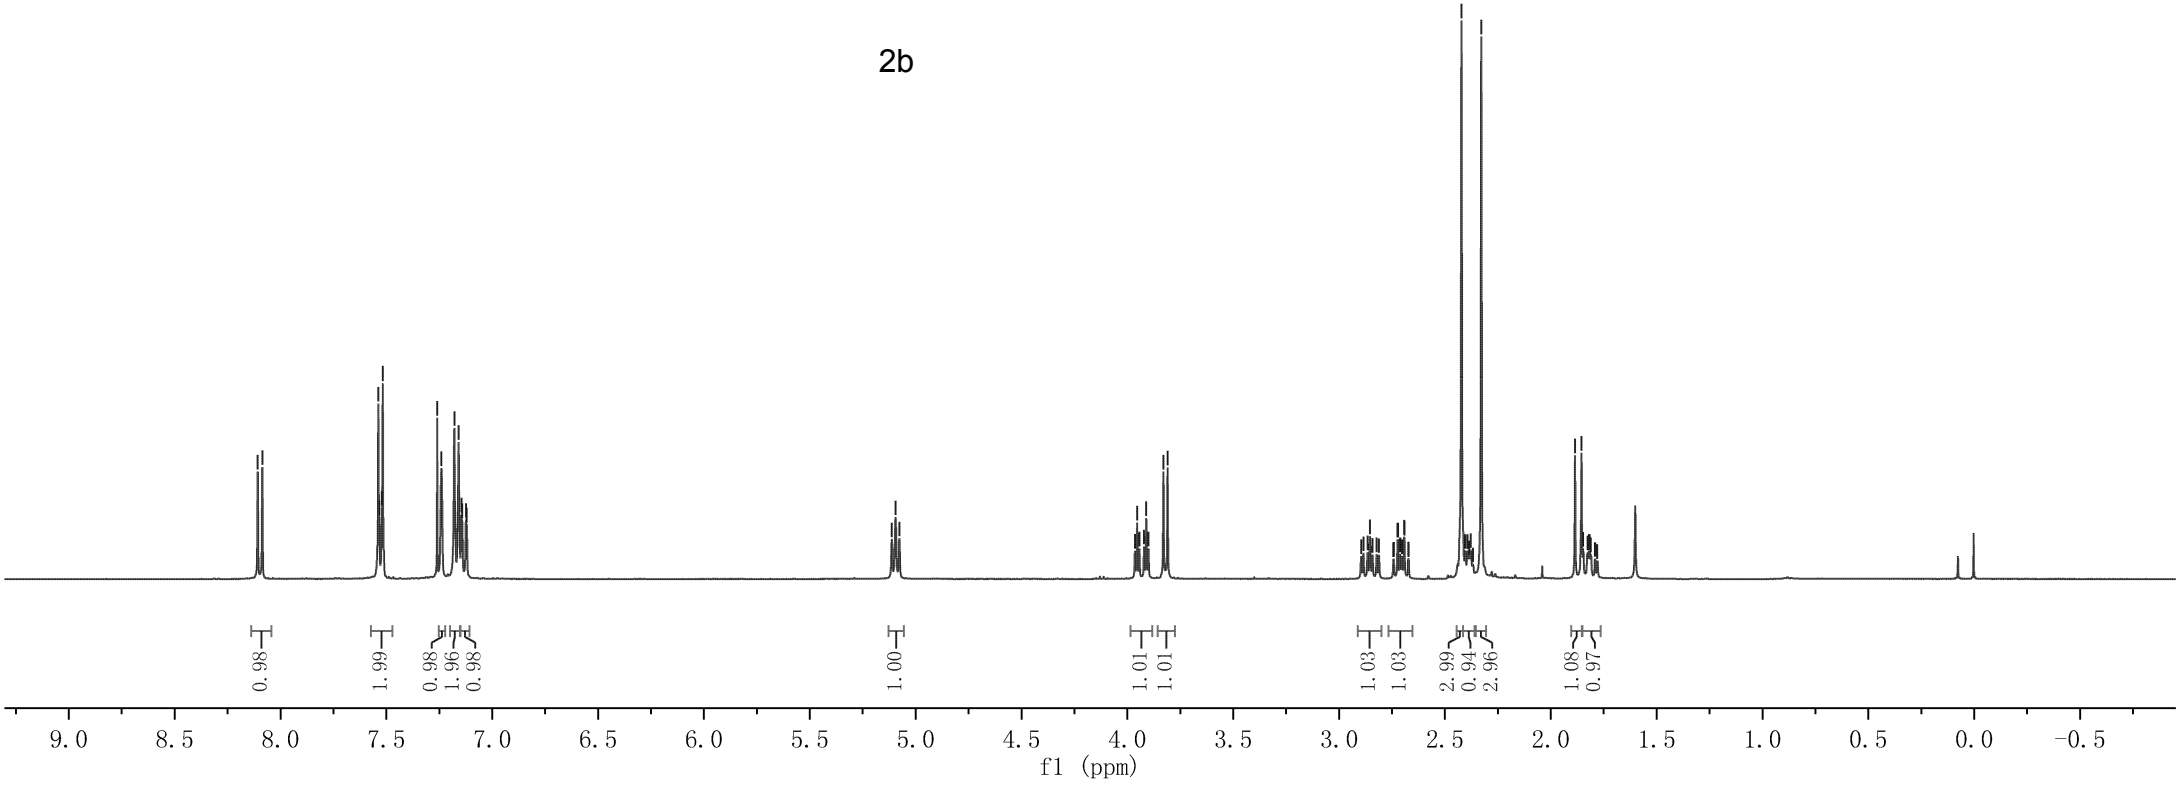

— 175.50

— 144.94

136.76

135.83

134.61

133.57

129.85

128.78

126.24

126.10

121.36

117.65

115.18

78.42

77.32

77.00

76.68

36.92

35.86

31.75

21.50

21.22

19.87

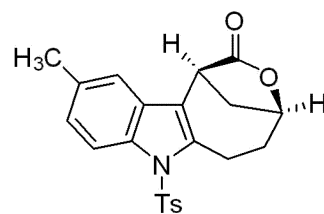

2b

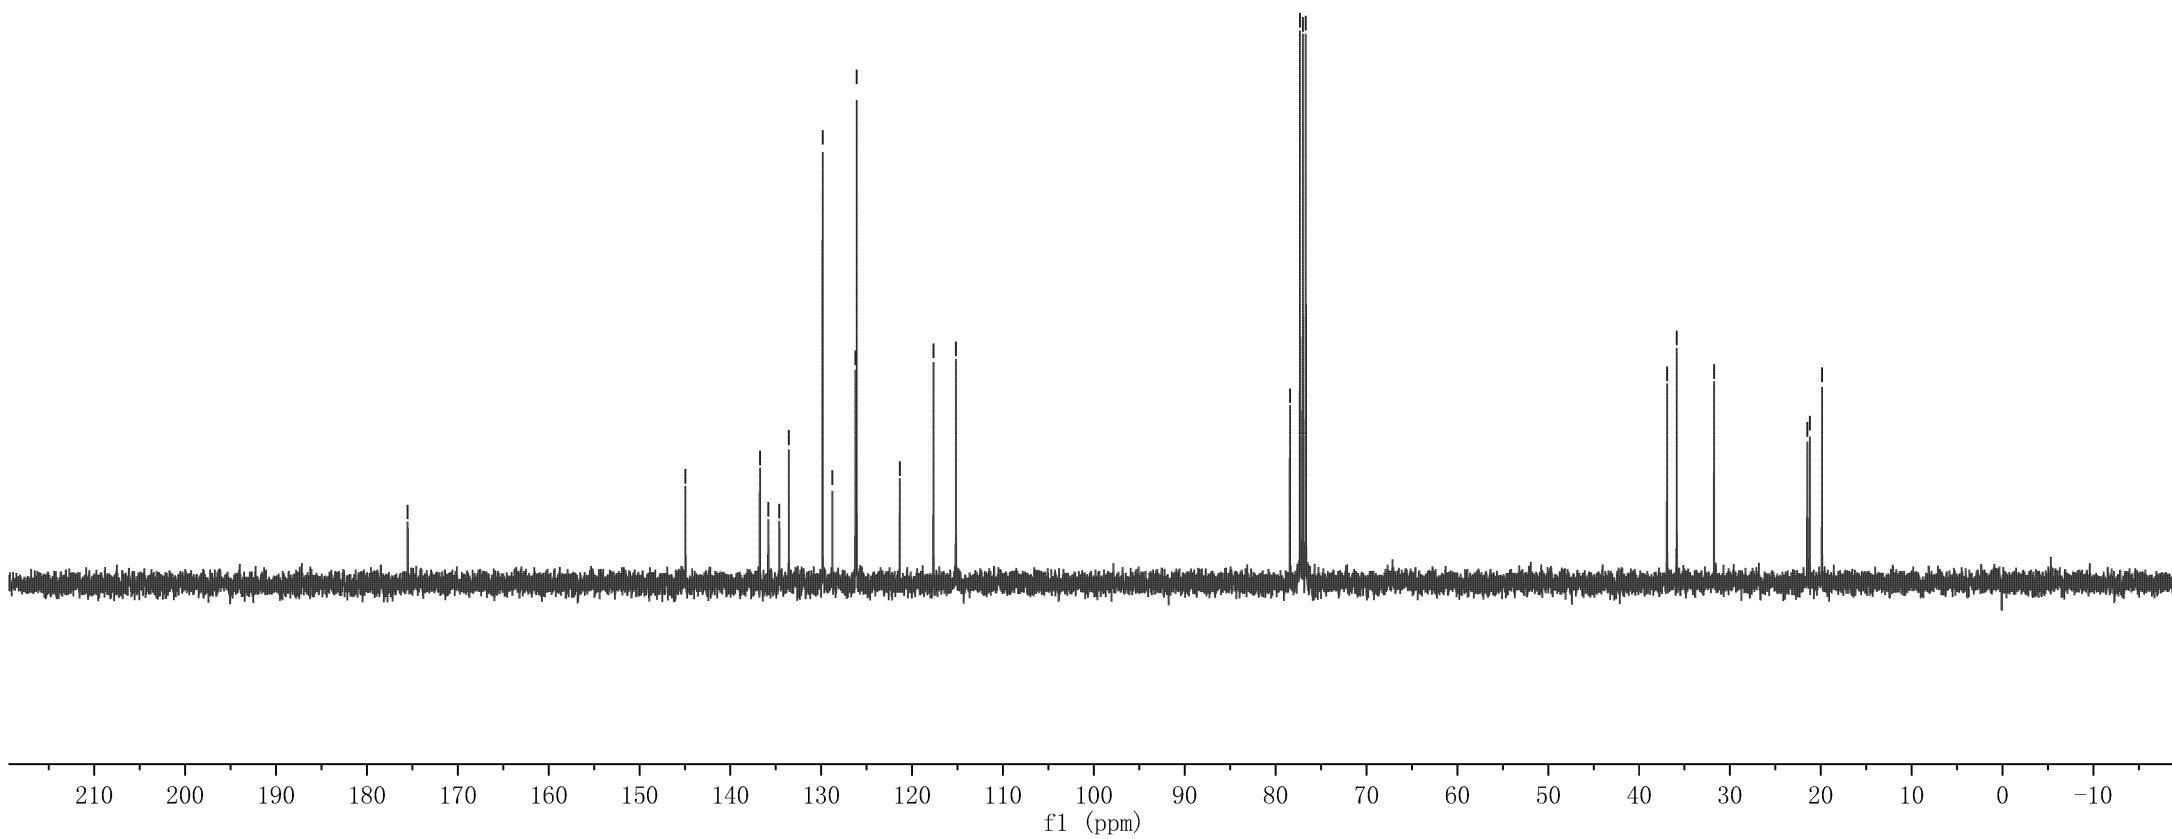

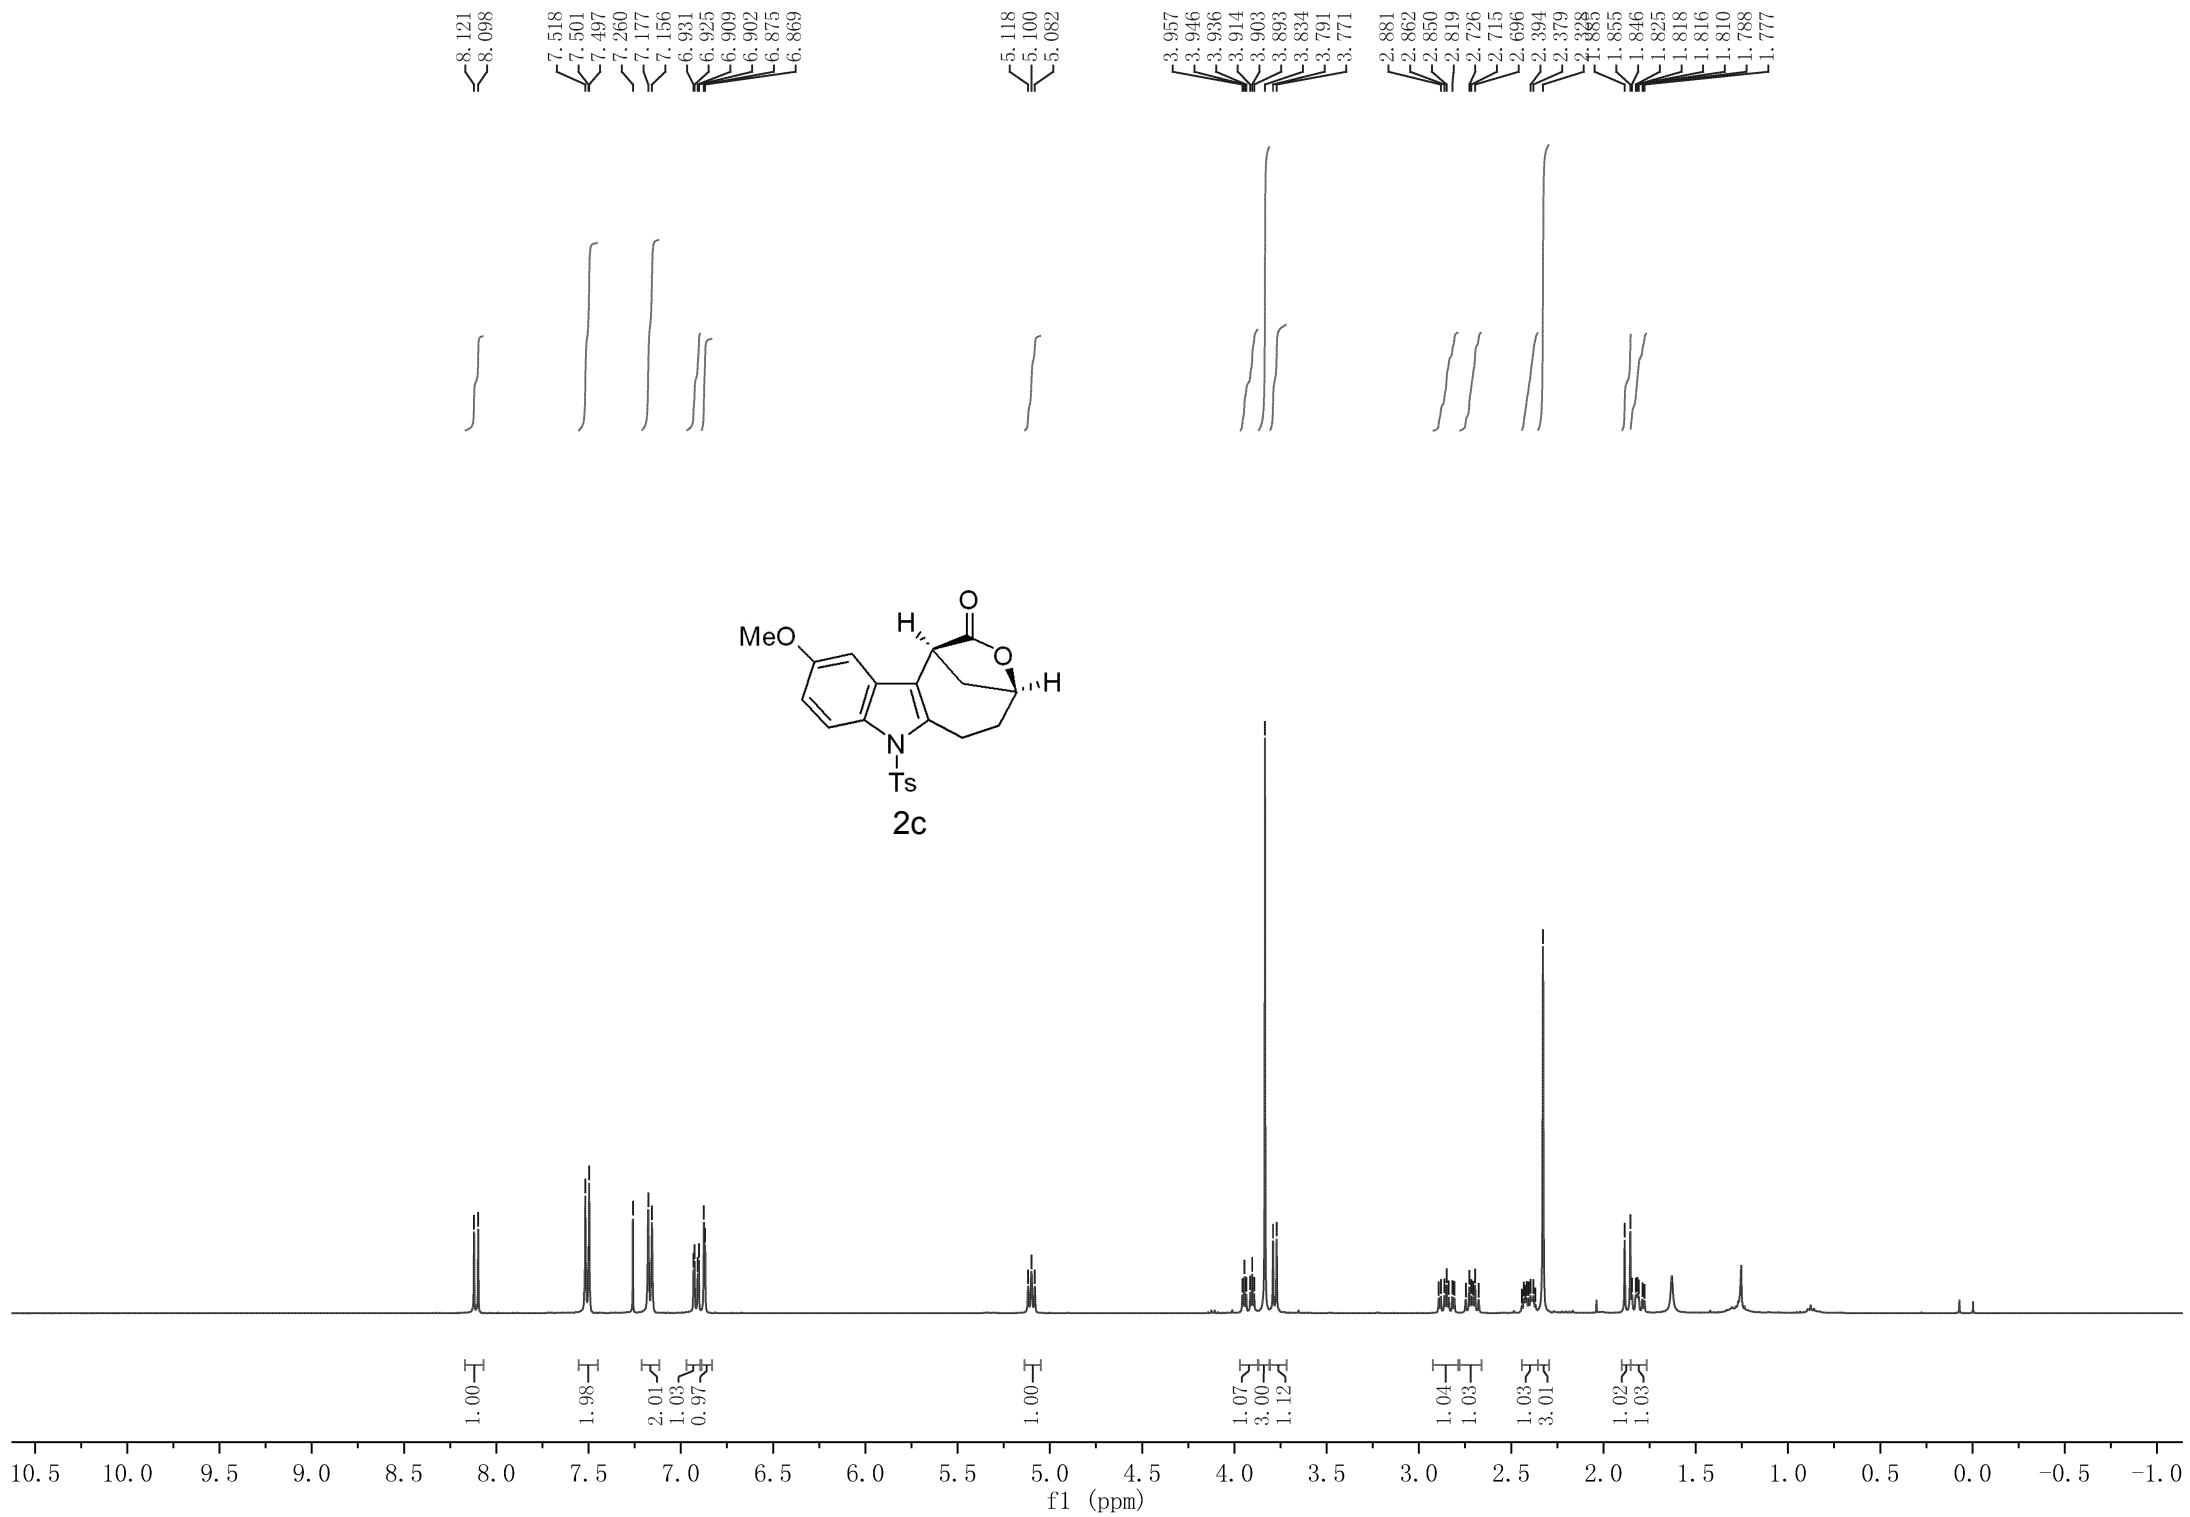

— 175.49  
— 156.93  
— 144.98  
137.51  
135.61  
130.88  
129.84  
129.64  
126.08  
121.67  
— 116.52  
— 113.63  
— 100.35  
78.44  
77.32  
77.00  
76.68  
— 55.63  
36.93  
35.96  
31.72  
21.51  
19.94

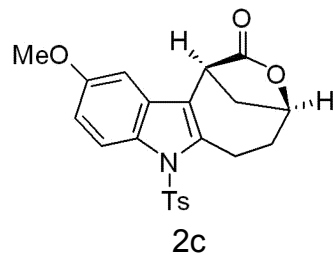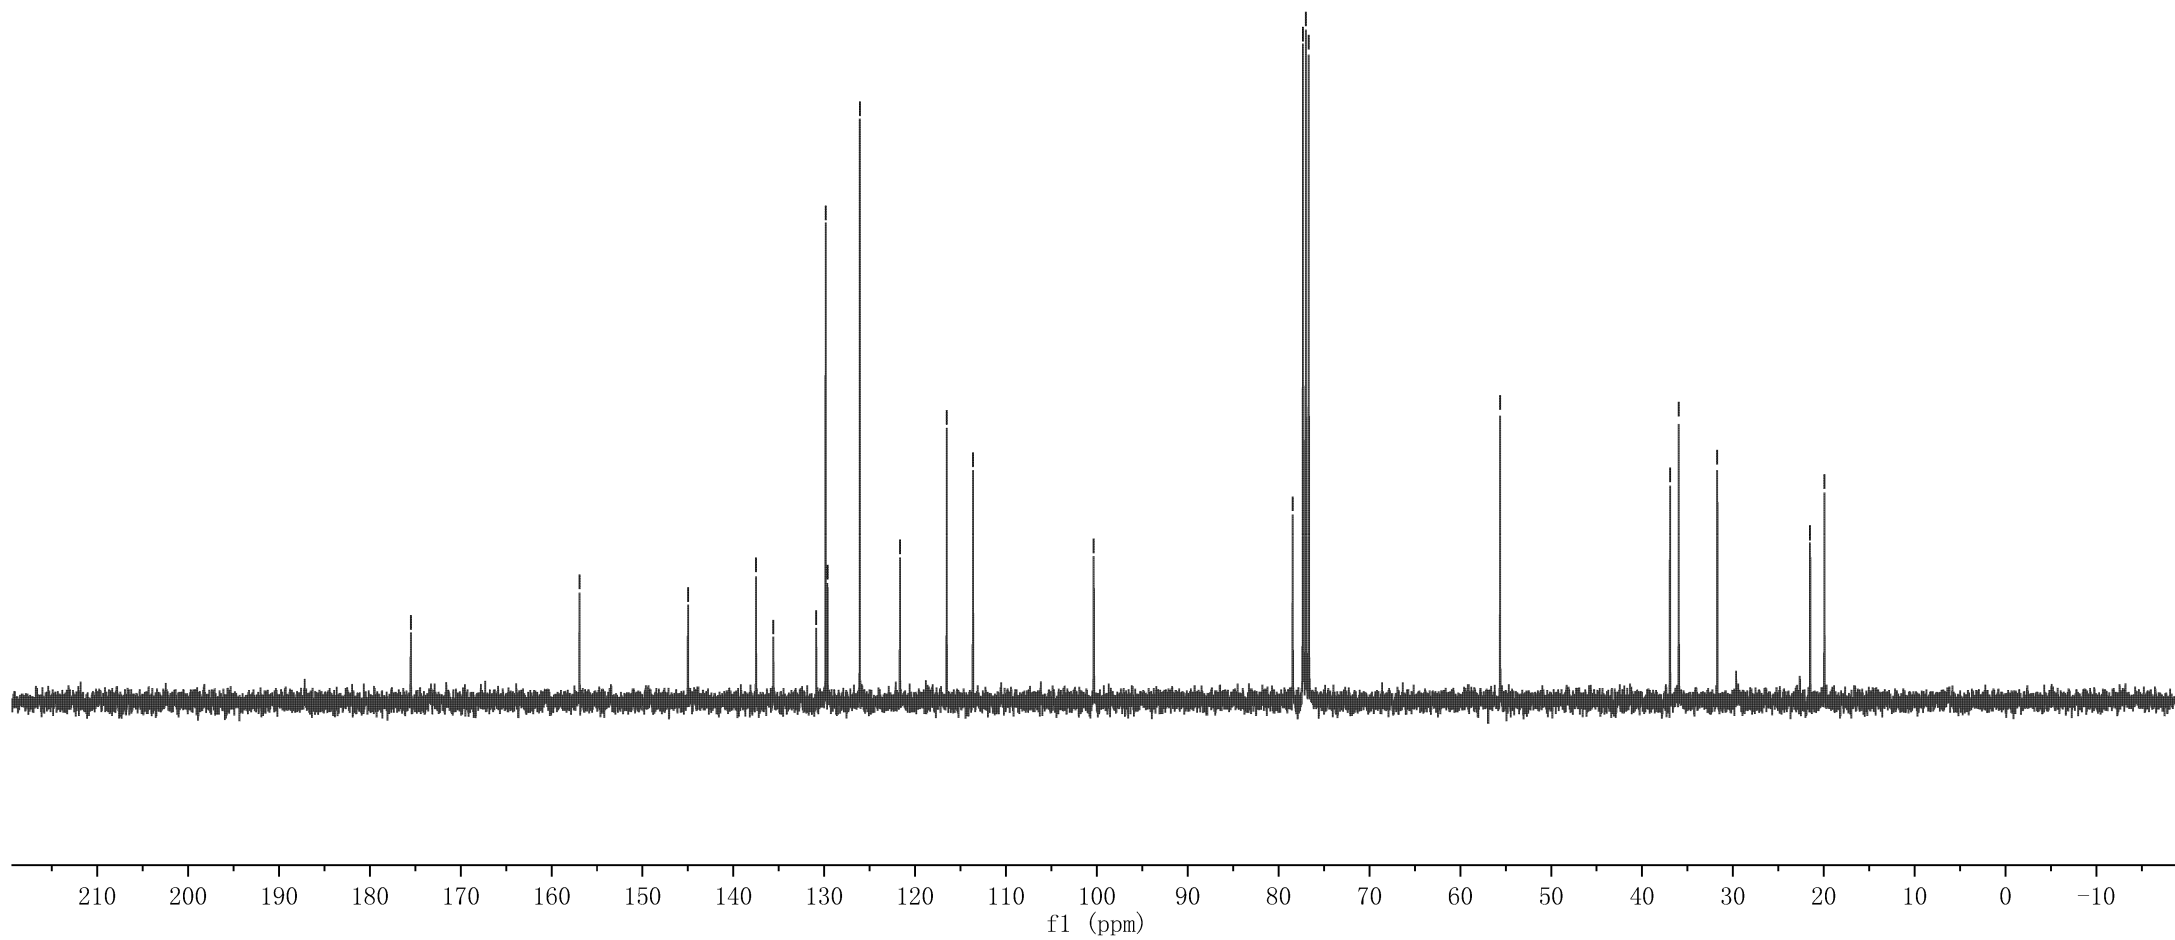

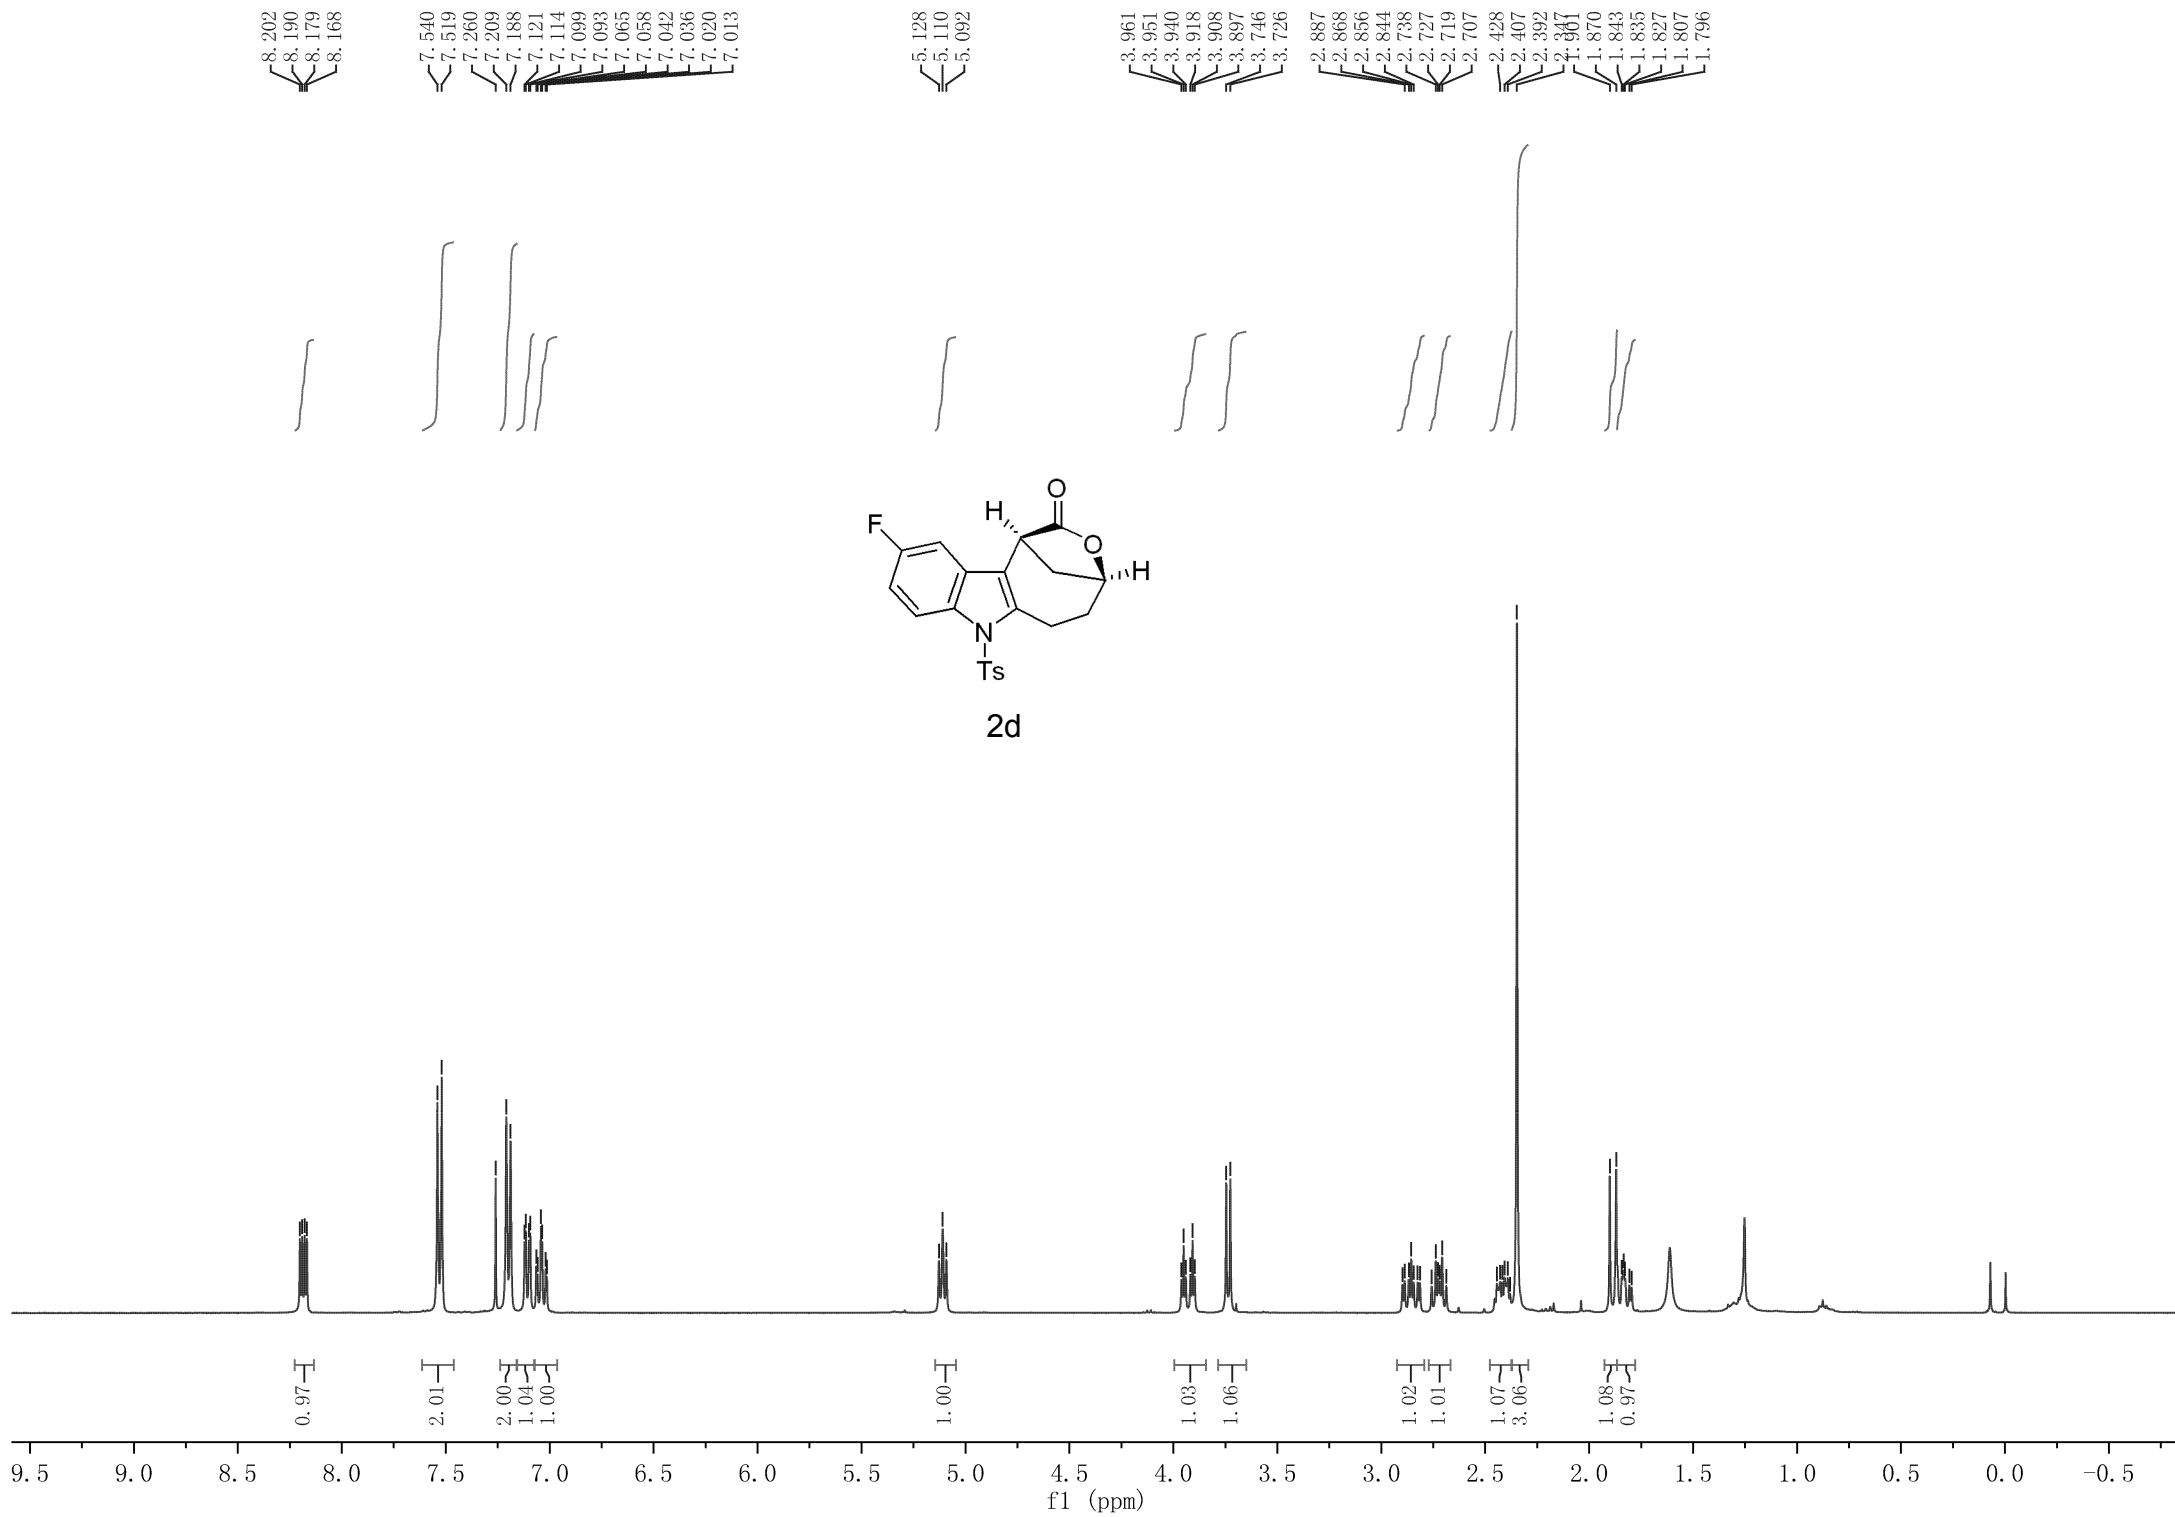

175.21  
160.98  
159.06  
145.35  
138.53  
135.50  
132.51  
130.00  
129.71  
129.63  
126.13  
121.21  
121.18  
116.70  
116.62  
112.76  
112.56  
103.62  
103.43  
78.37  
77.25  
77.00  
76.75  
36.83  
36.01  
31.62  
21.55  
19.98

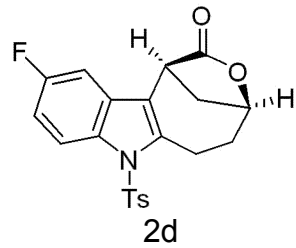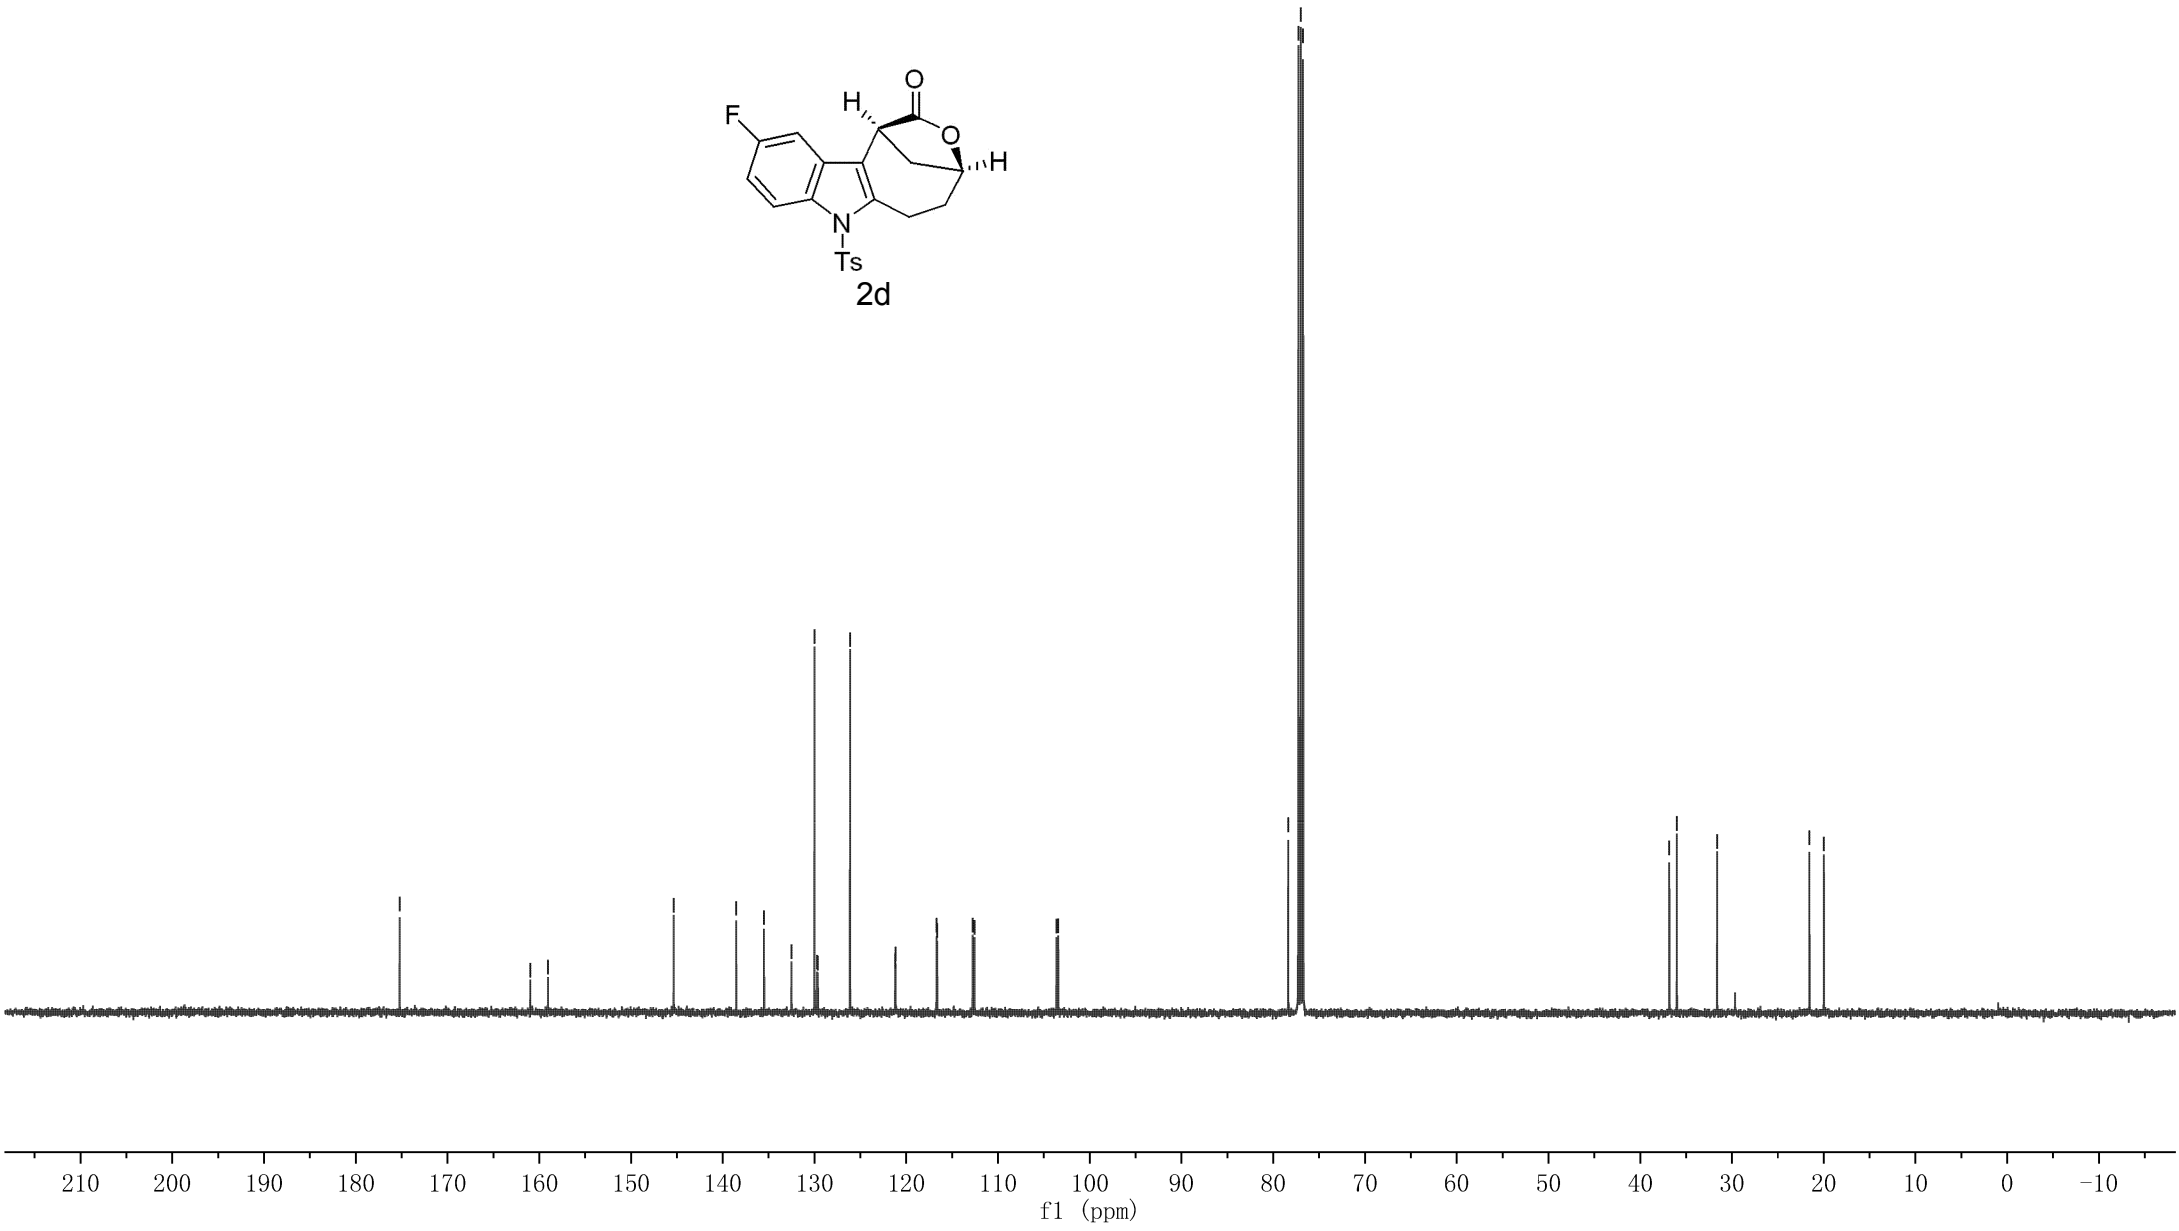

8.174  
8.152  
7.548  
7.527  
7.438  
7.433  
7.285  
7.280  
7.260  
7.214  
7.194

5.124  
5.106  
5.088

3.959  
3.949  
3.938  
3.916  
3.906  
3.895  
3.777  
3.757

2.876  
2.857  
2.845  
2.736  
2.725  
2.717  
2.706

2.404  
2.389  
2.369  
1.862  
1.836  
1.828  
1.800  
1.789

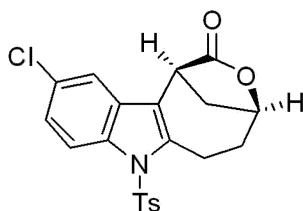

2e

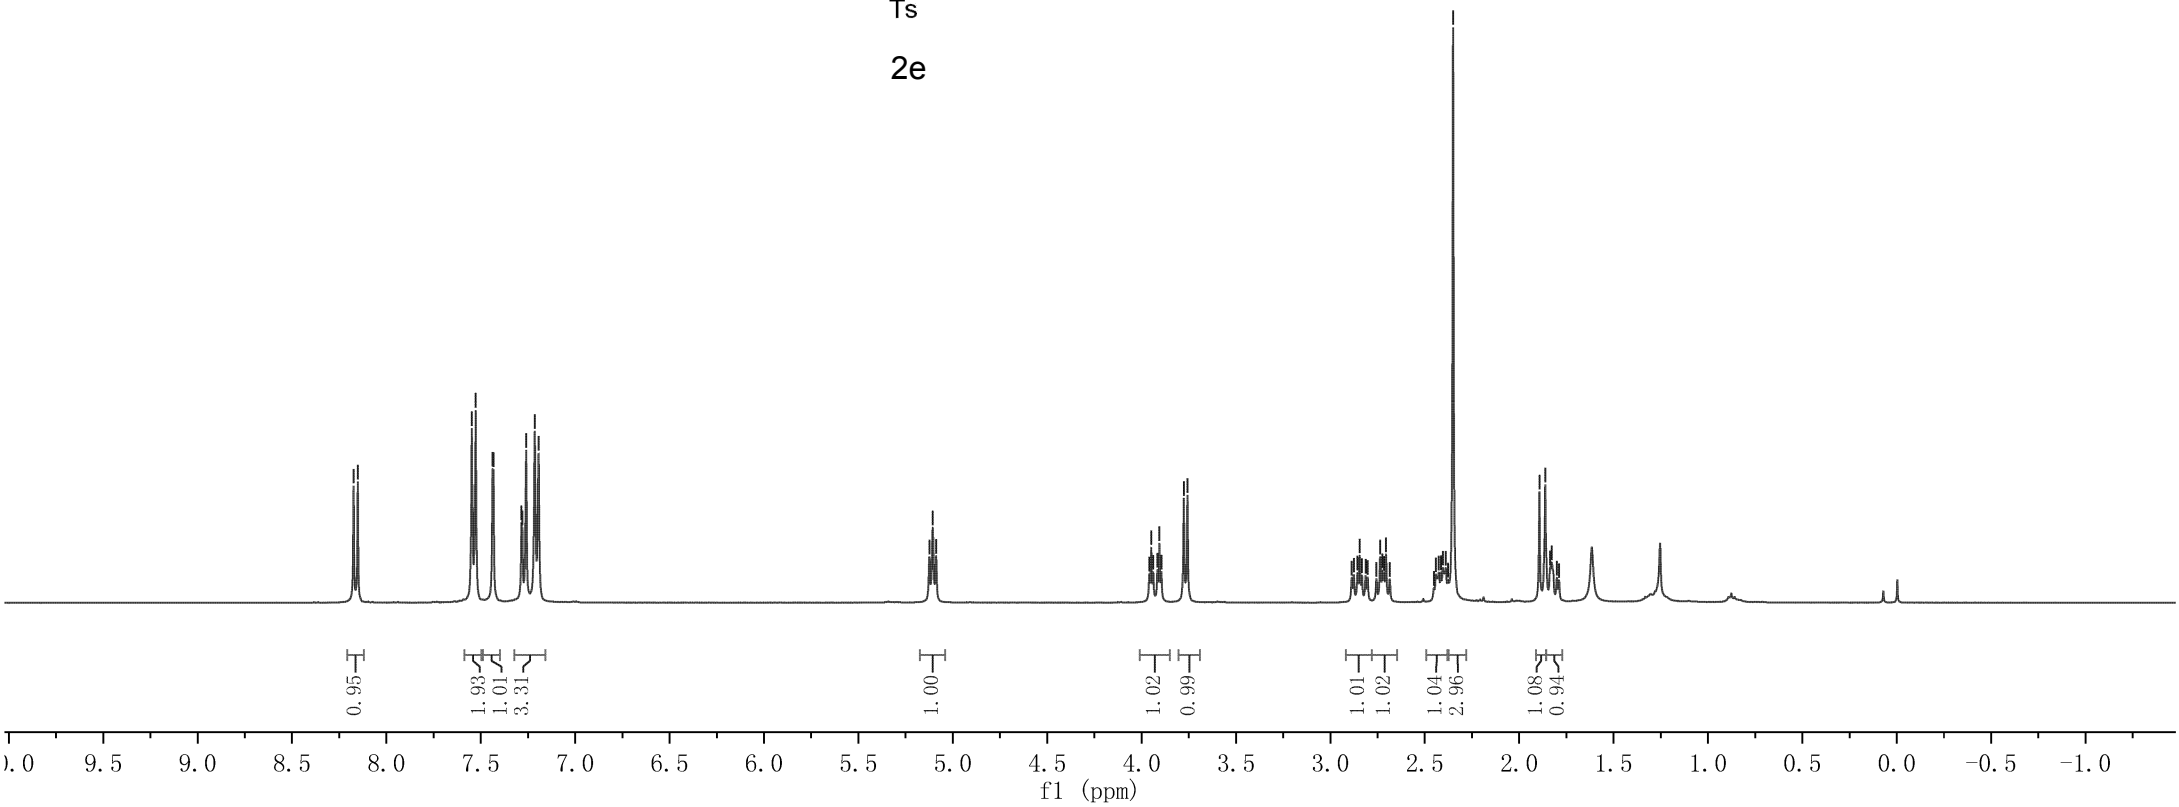

— 175.09

— 145.44

— 138.25

— 135.55

— 134.62

— 130.05

— 129.80

— 129.75

— 126.15

— 125.00

— 120.65

— 117.51

— 116.49

— 78.33

— 77.32

— 77.00

— 76.68

— 36.83

— 35.89

— 31.60

— 21.55

— 19.91

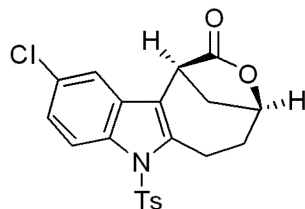

2e

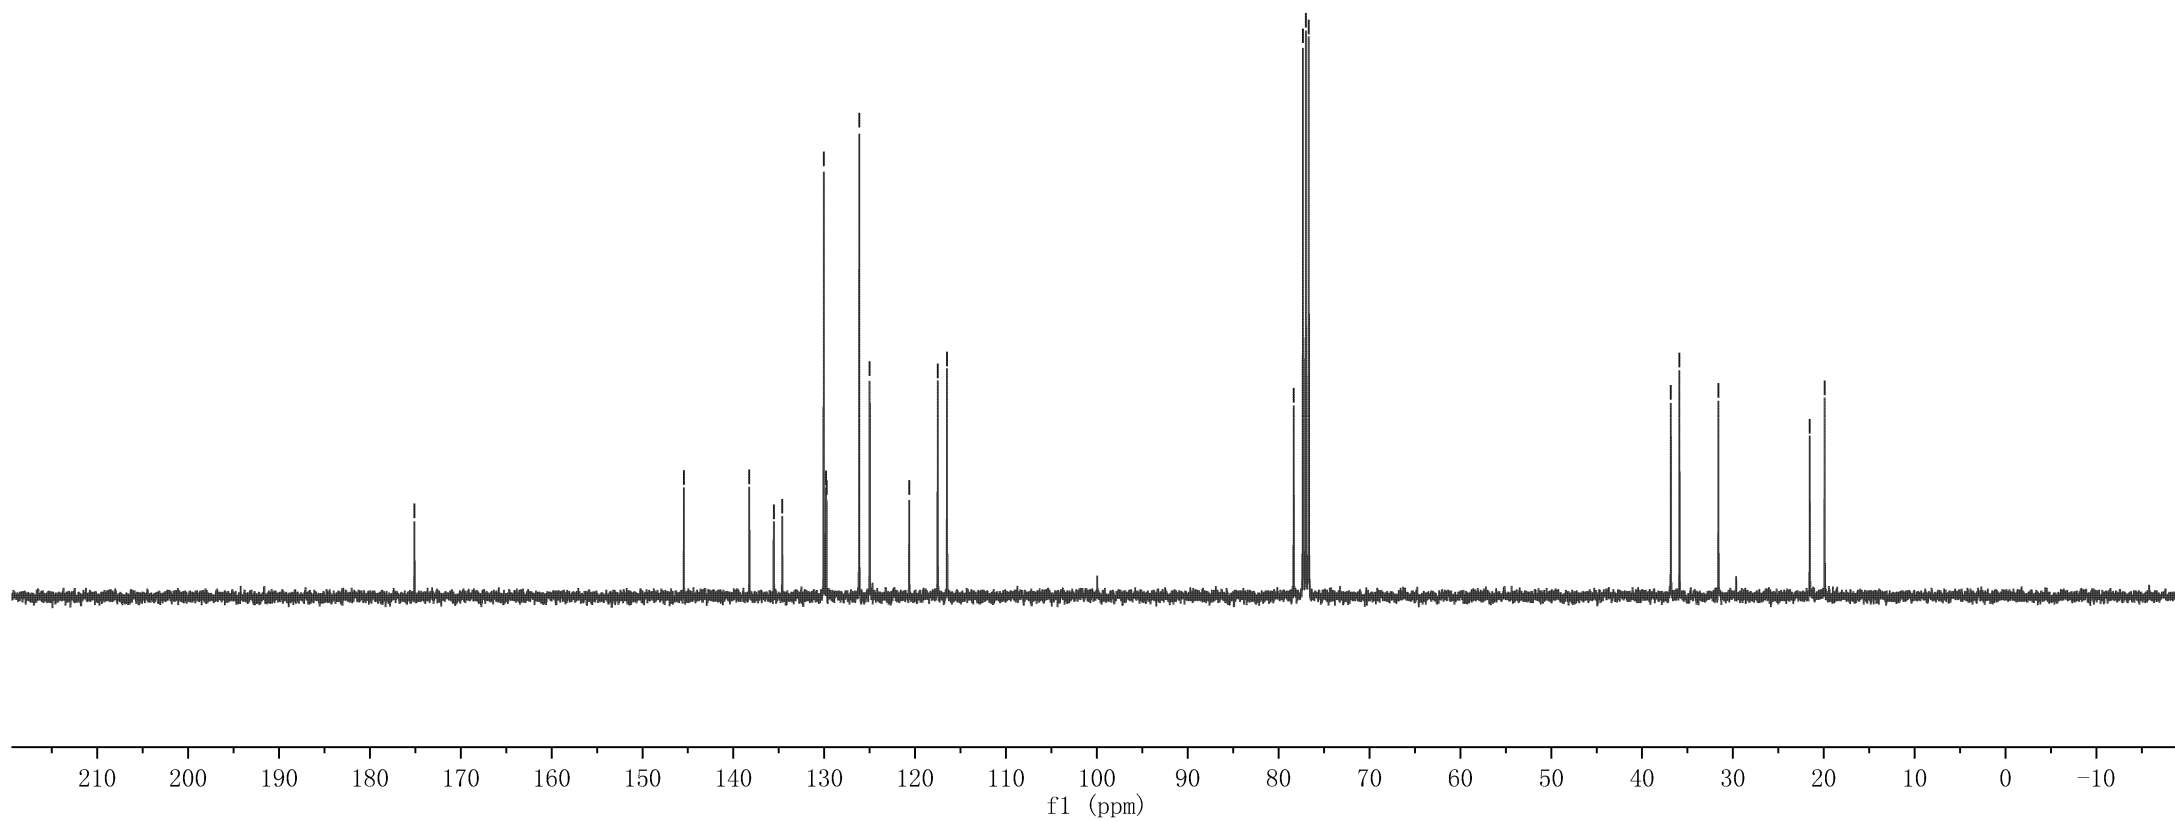



8.124  
8.102  
7.598  
7.594  
7.548  
7.527  
7.422  
7.417  
7.400  
7.395  
7.260  
7.216  
7.196

5.125  
5.107  
5.089

3.963  
3.952  
3.941  
3.920  
3.909  
3.898  
3.778  
3.758

2.874  
2.855  
2.843  
2.831  
2.812  
2.735  
2.724  
2.705  
2.416  
2.405  
2.390  
2.352  
1.890  
1.859  
1.834  
1.825  
1.819  
1.798  
1.788

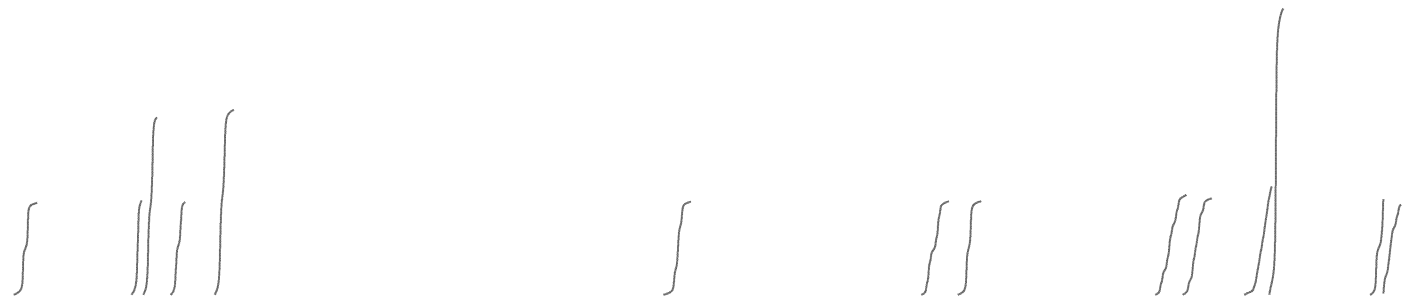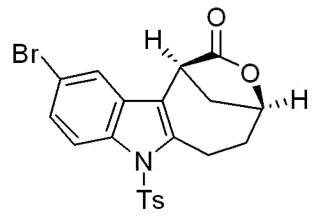

2f

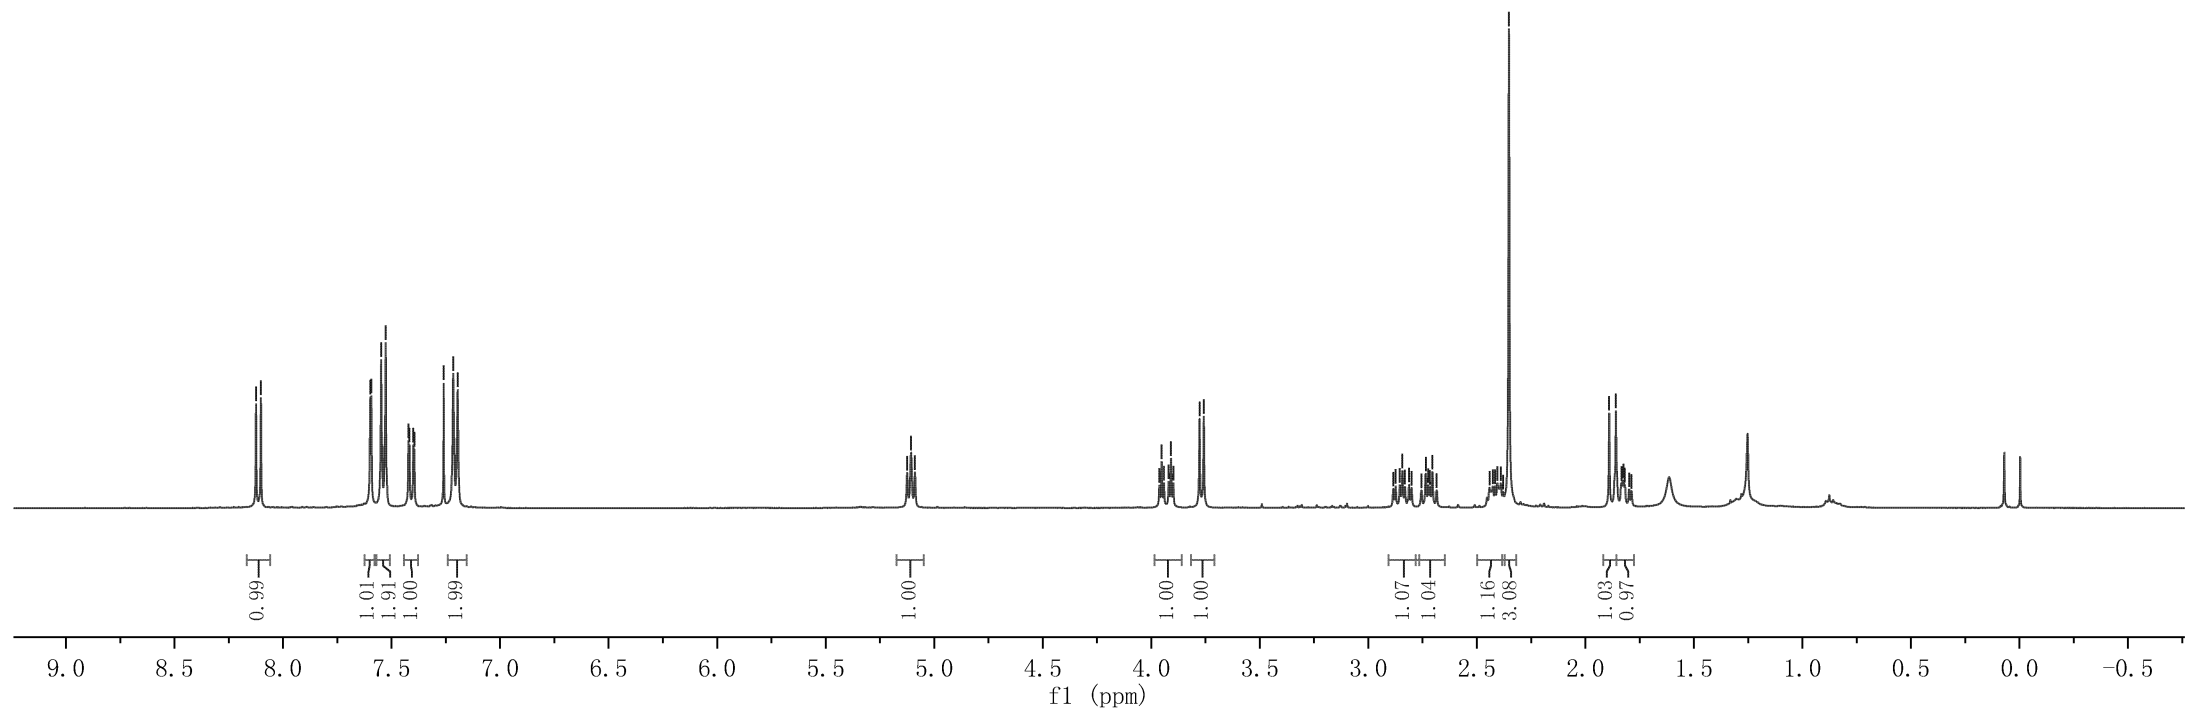

— 175.07

— 145.47

138.10

135.55

135.01

130.19

130.07

127.68

126.16

120.58

120.51

117.40

116.83

78.33

77.32

77.00

76.68

36.86

35.86

31.60

21.56

19.87

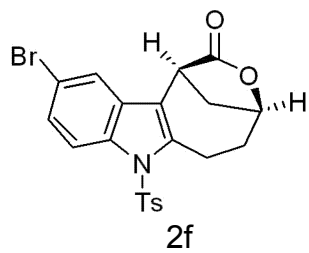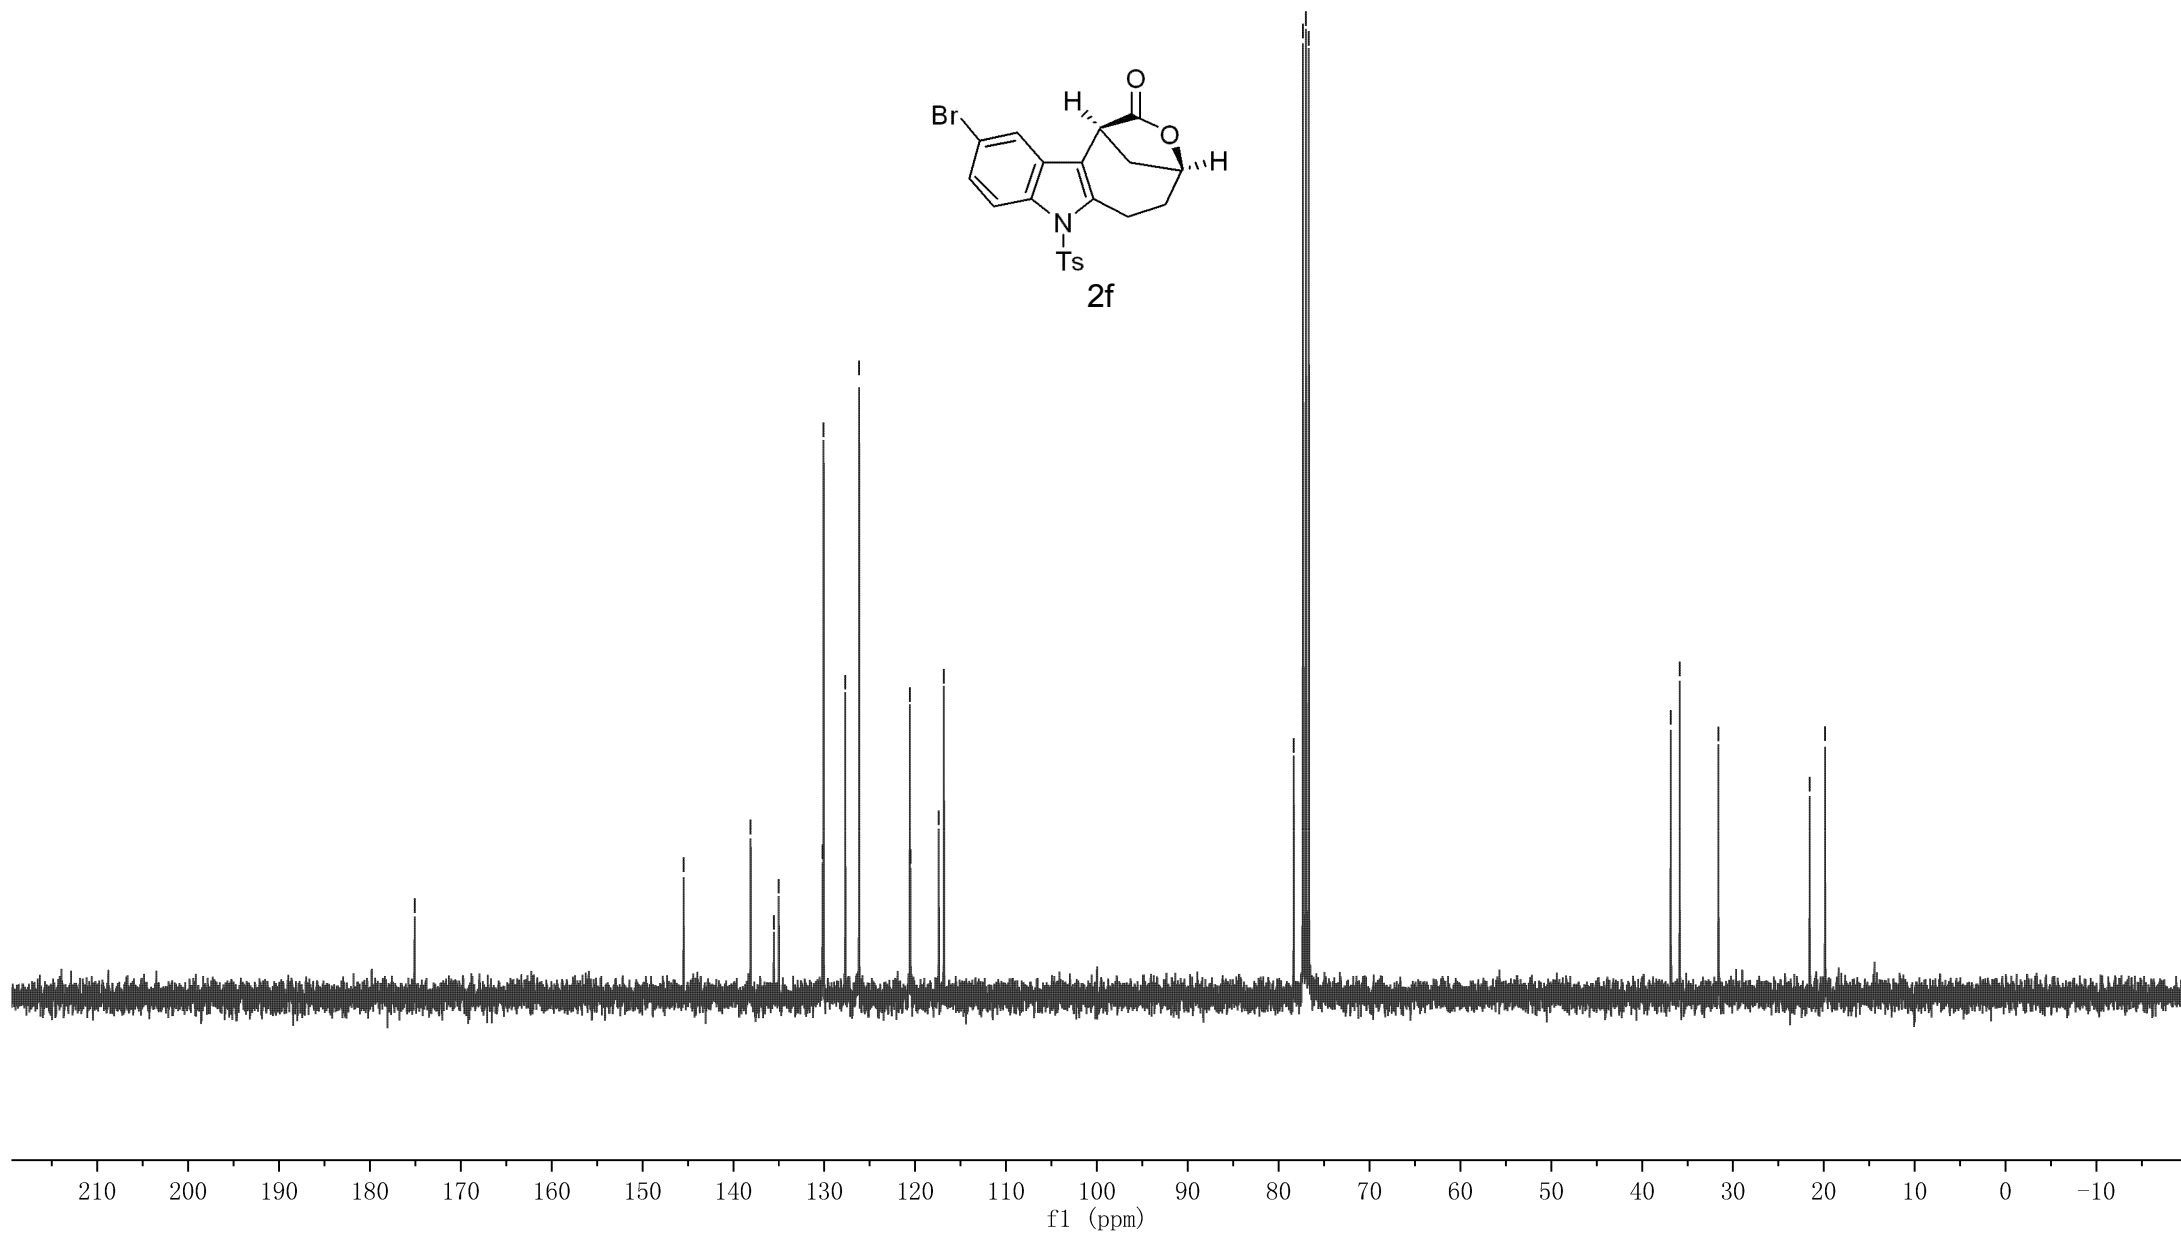

8.371  
8.349  
7.760  
7.591  
7.574  
7.570  
7.556  
7.260  
7.239  
7.219

5.146  
5.128  
5.110

3.995  
3.985  
3.974  
3.952  
3.942  
3.931  
3.892  
3.873

2.893  
2.873  
2.861  
2.830  
2.775  
2.765  
2.756  
2.745

2.439  
2.428  
2.413  
2.361  
1.895  
1.889  
1.878  
1.857  
1.850  
1.848  
1.841  
1.821  
1.810

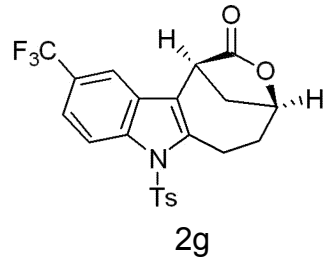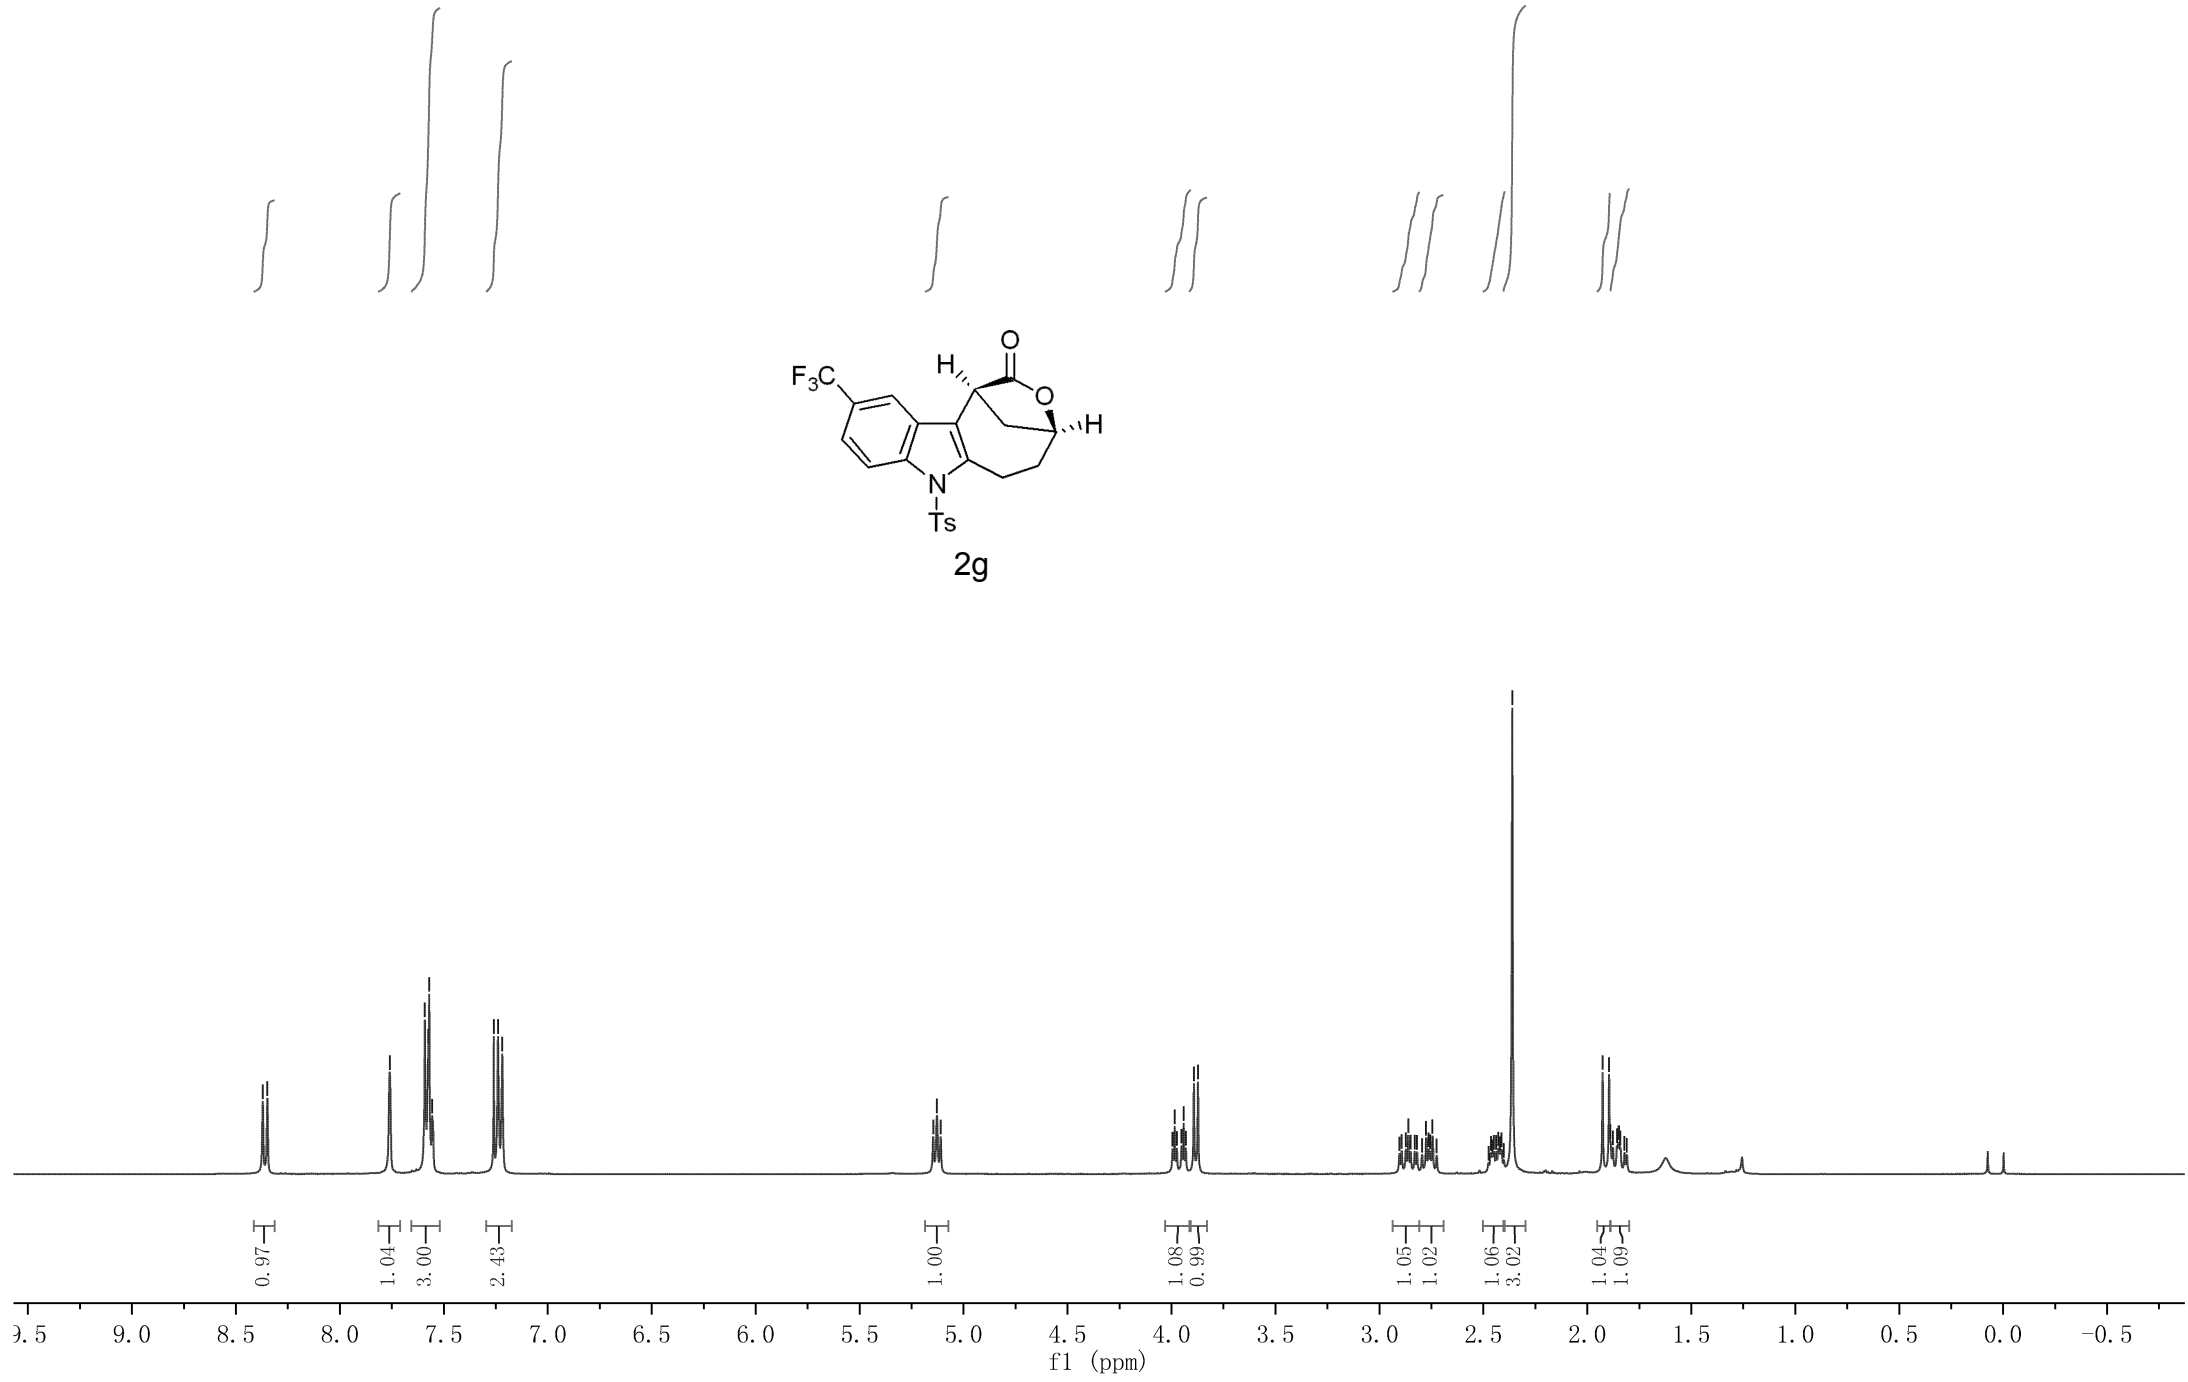

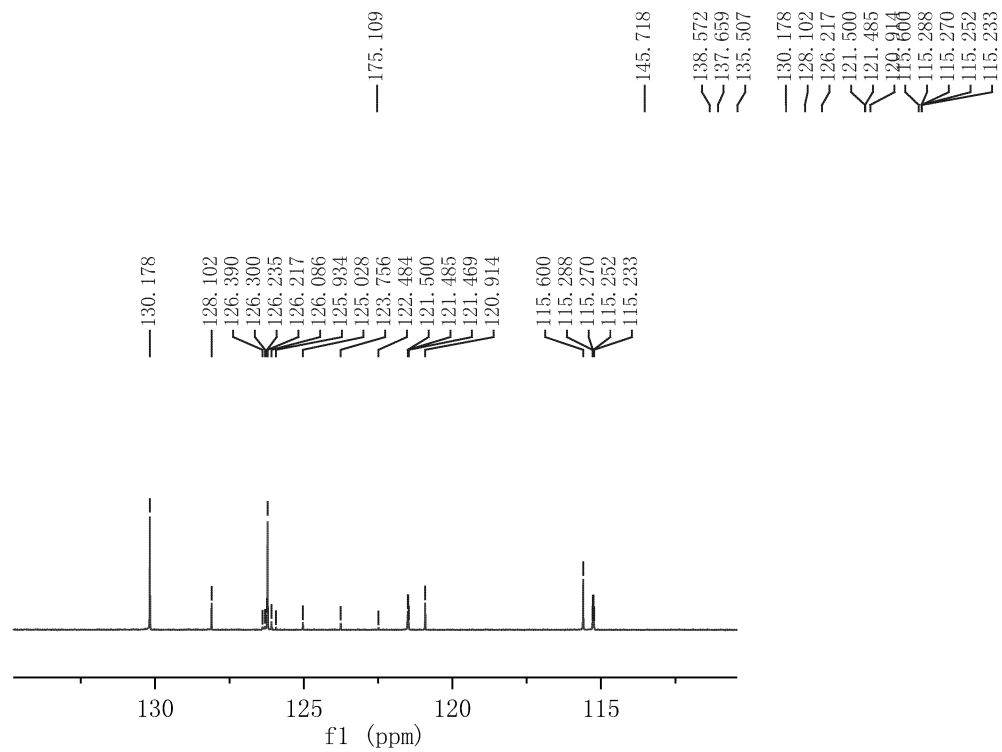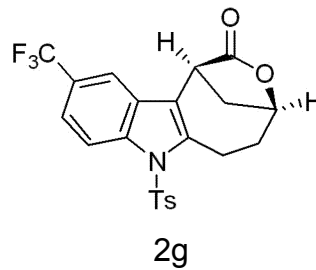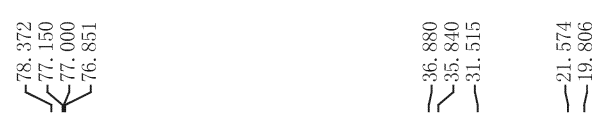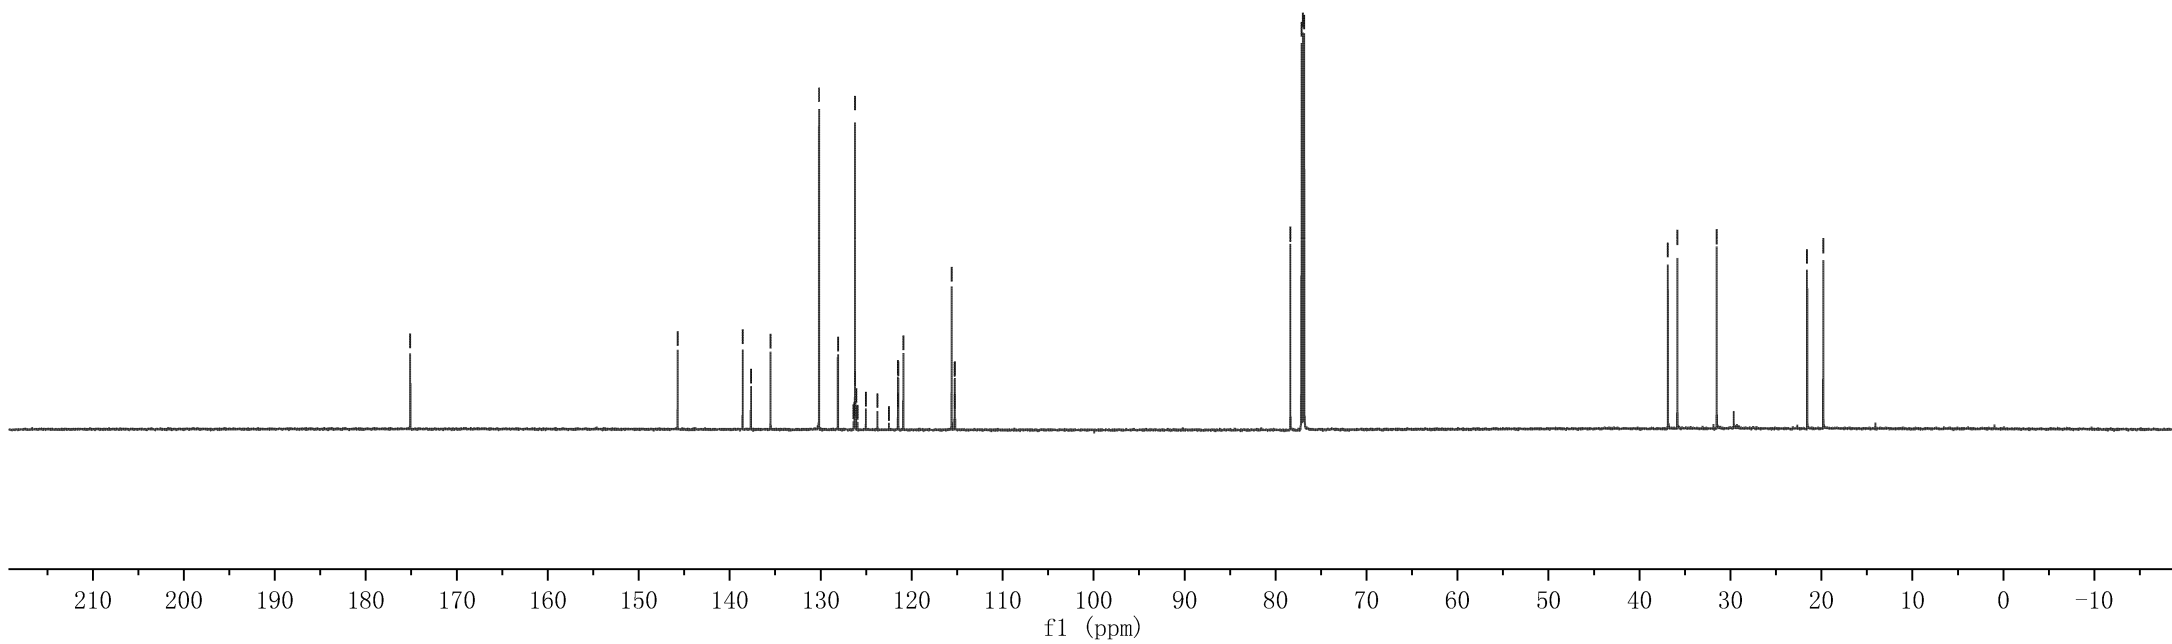

8.362  
8.360  
8.340  
8.338

7.820  
7.817  
7.594  
7.577  
7.566  
7.256  
7.236

5.148  
5.131  
5.113

3.961  
3.950  
3.940  
3.918  
3.907  
3.896  
3.841  
3.822

2.887  
2.868  
2.856  
2.844  
2.825  
2.777  
2.767  
2.748  
2.446  
2.424  
2.409  
2.371  
1.903  
1.898  
1.886  
1.884  
1.865  
1.857  
1.849  
1.830  
1.828  
1.819

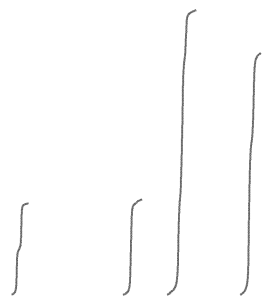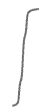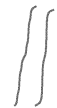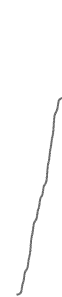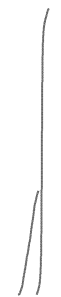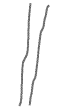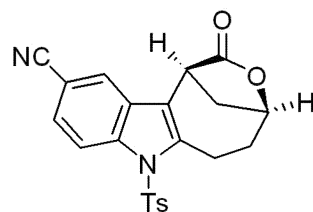

2h

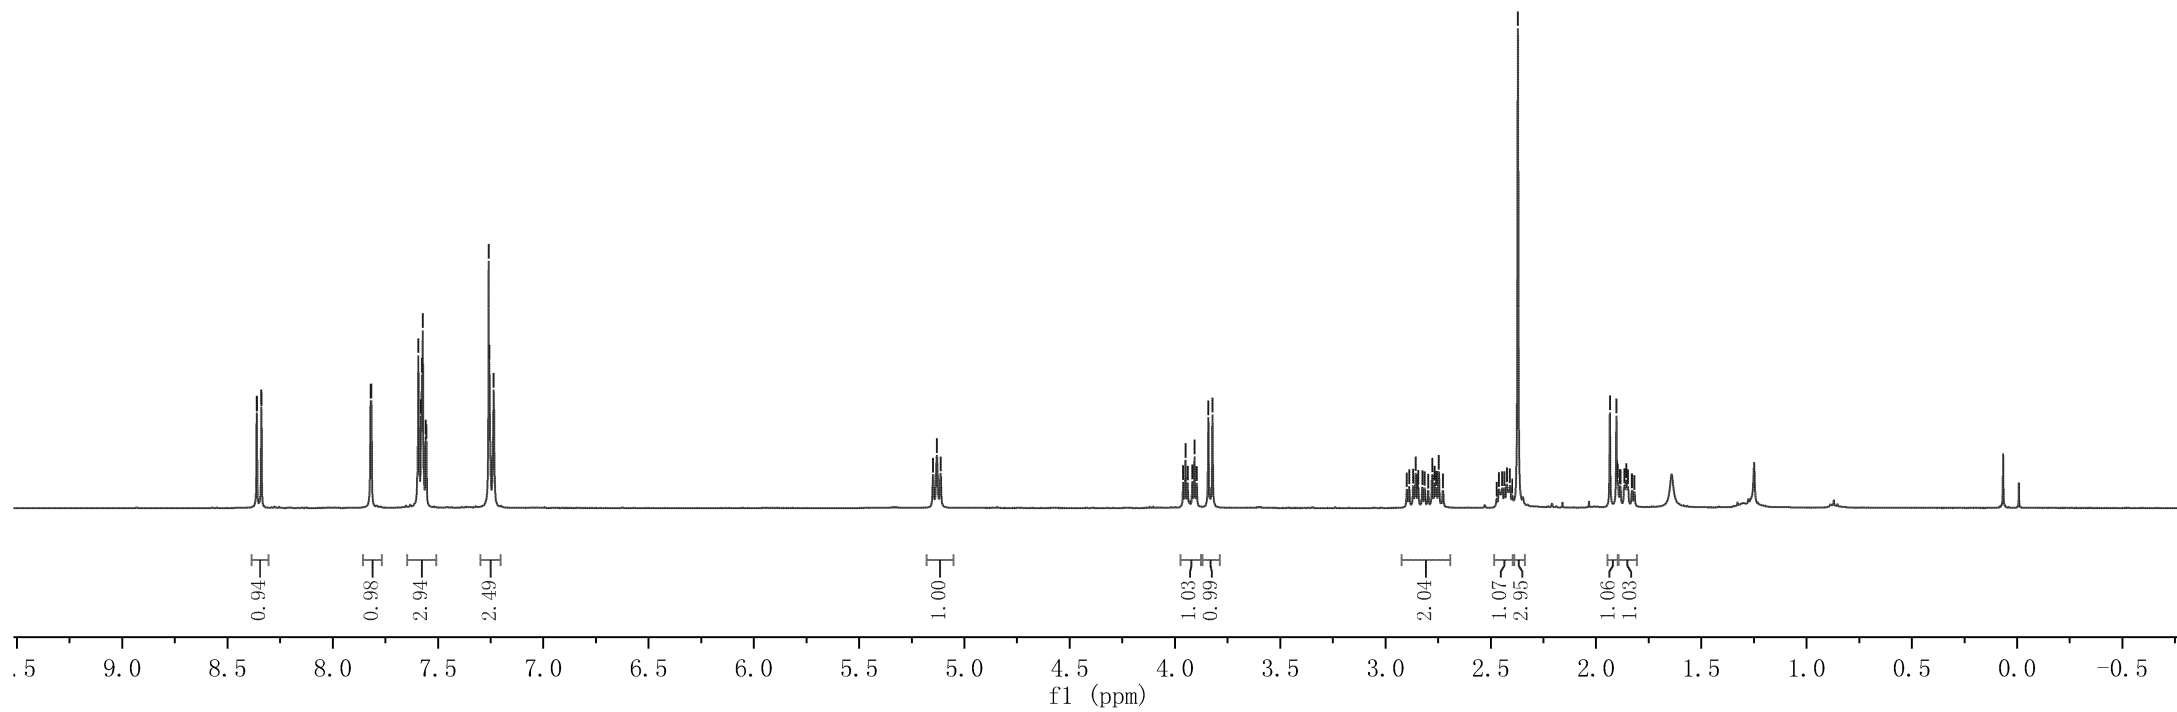

— 174.76

— 145.97

139.18

137.92

135.43

130.27

128.43

127.72

126.27

122.58

120.36

119.02

116.05

— 107.43

78.28

77.32

77.00

76.68

36.70

35.84

31.47

21.58

19.90

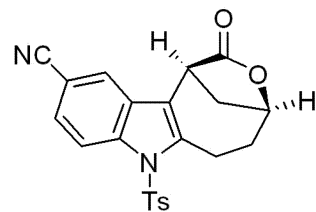

2h

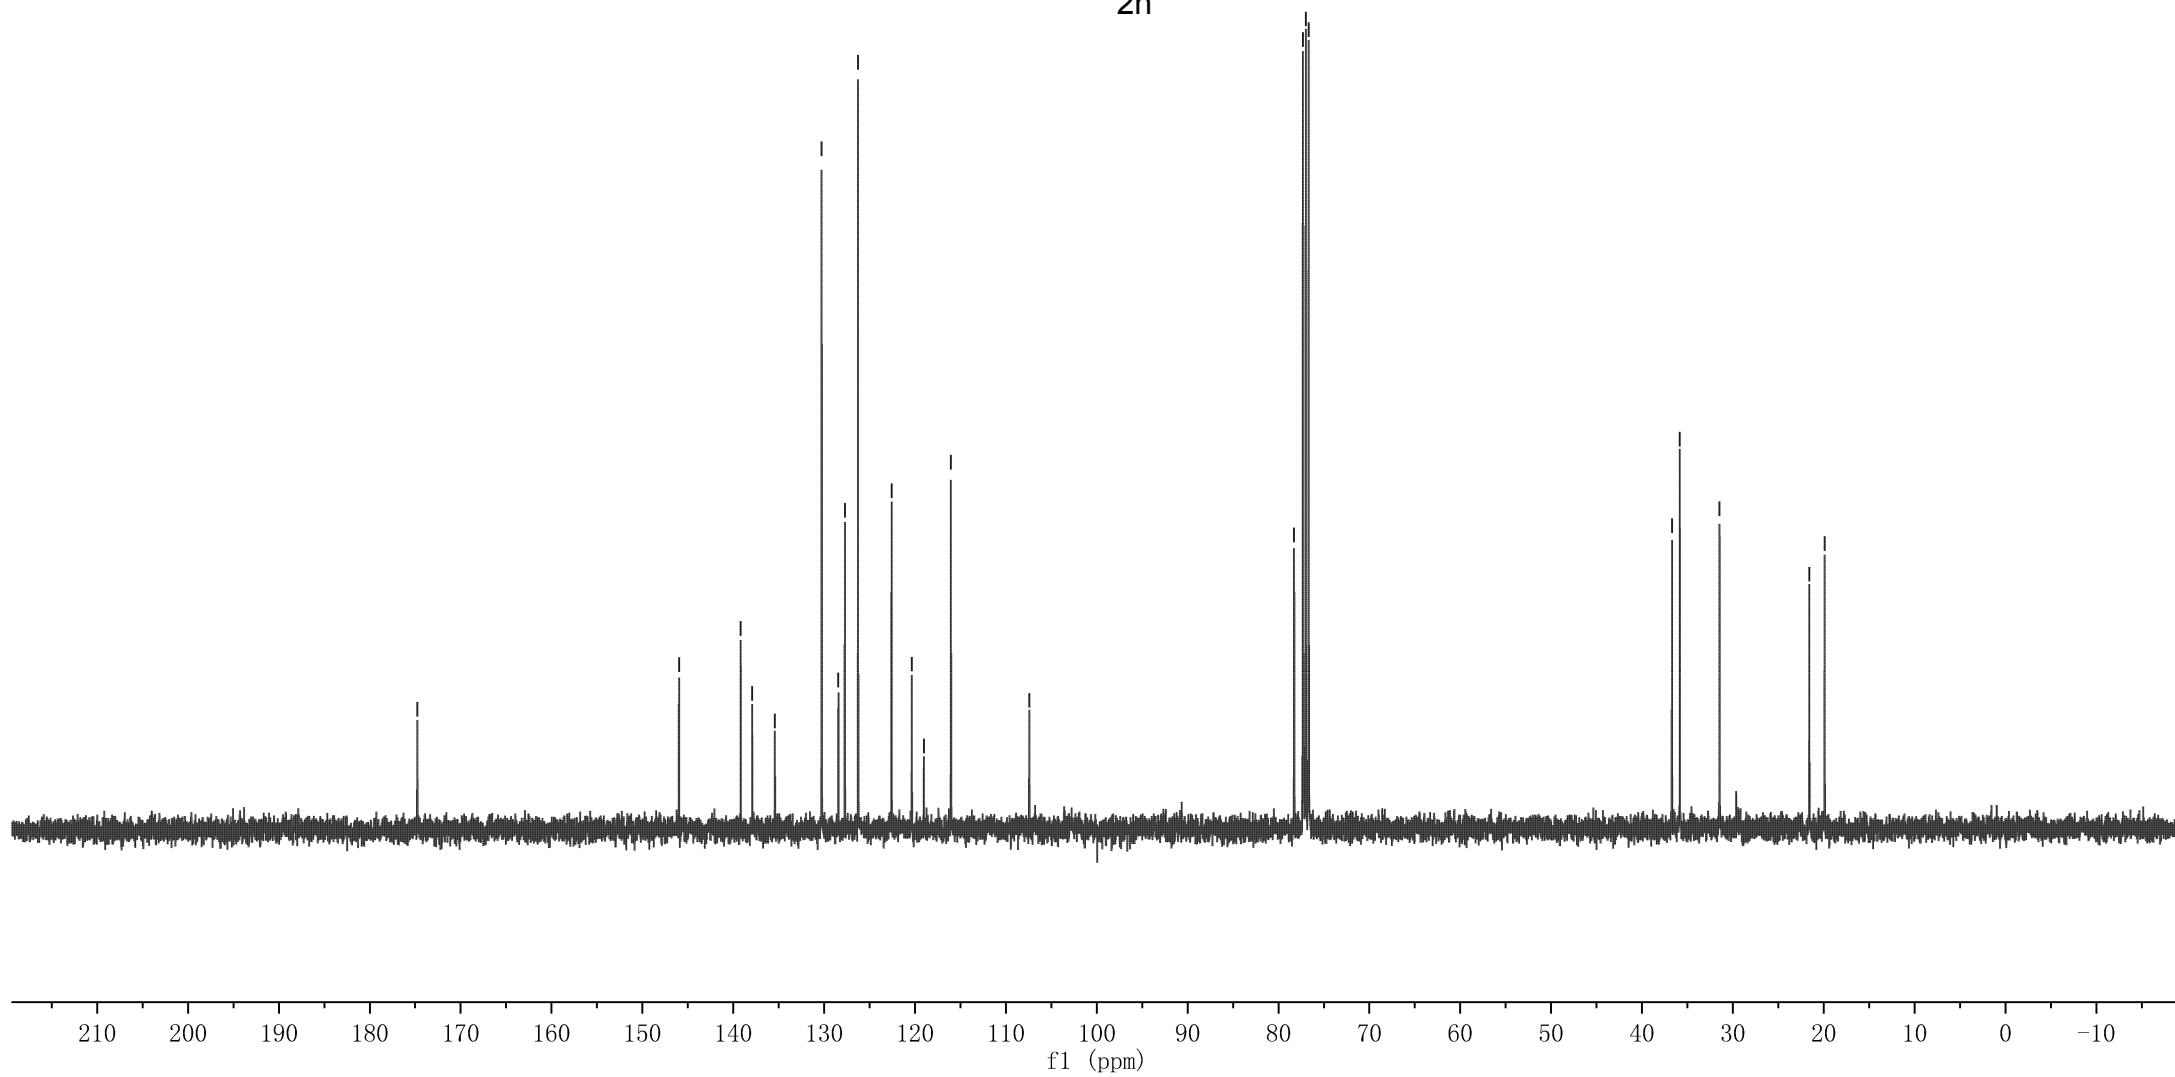

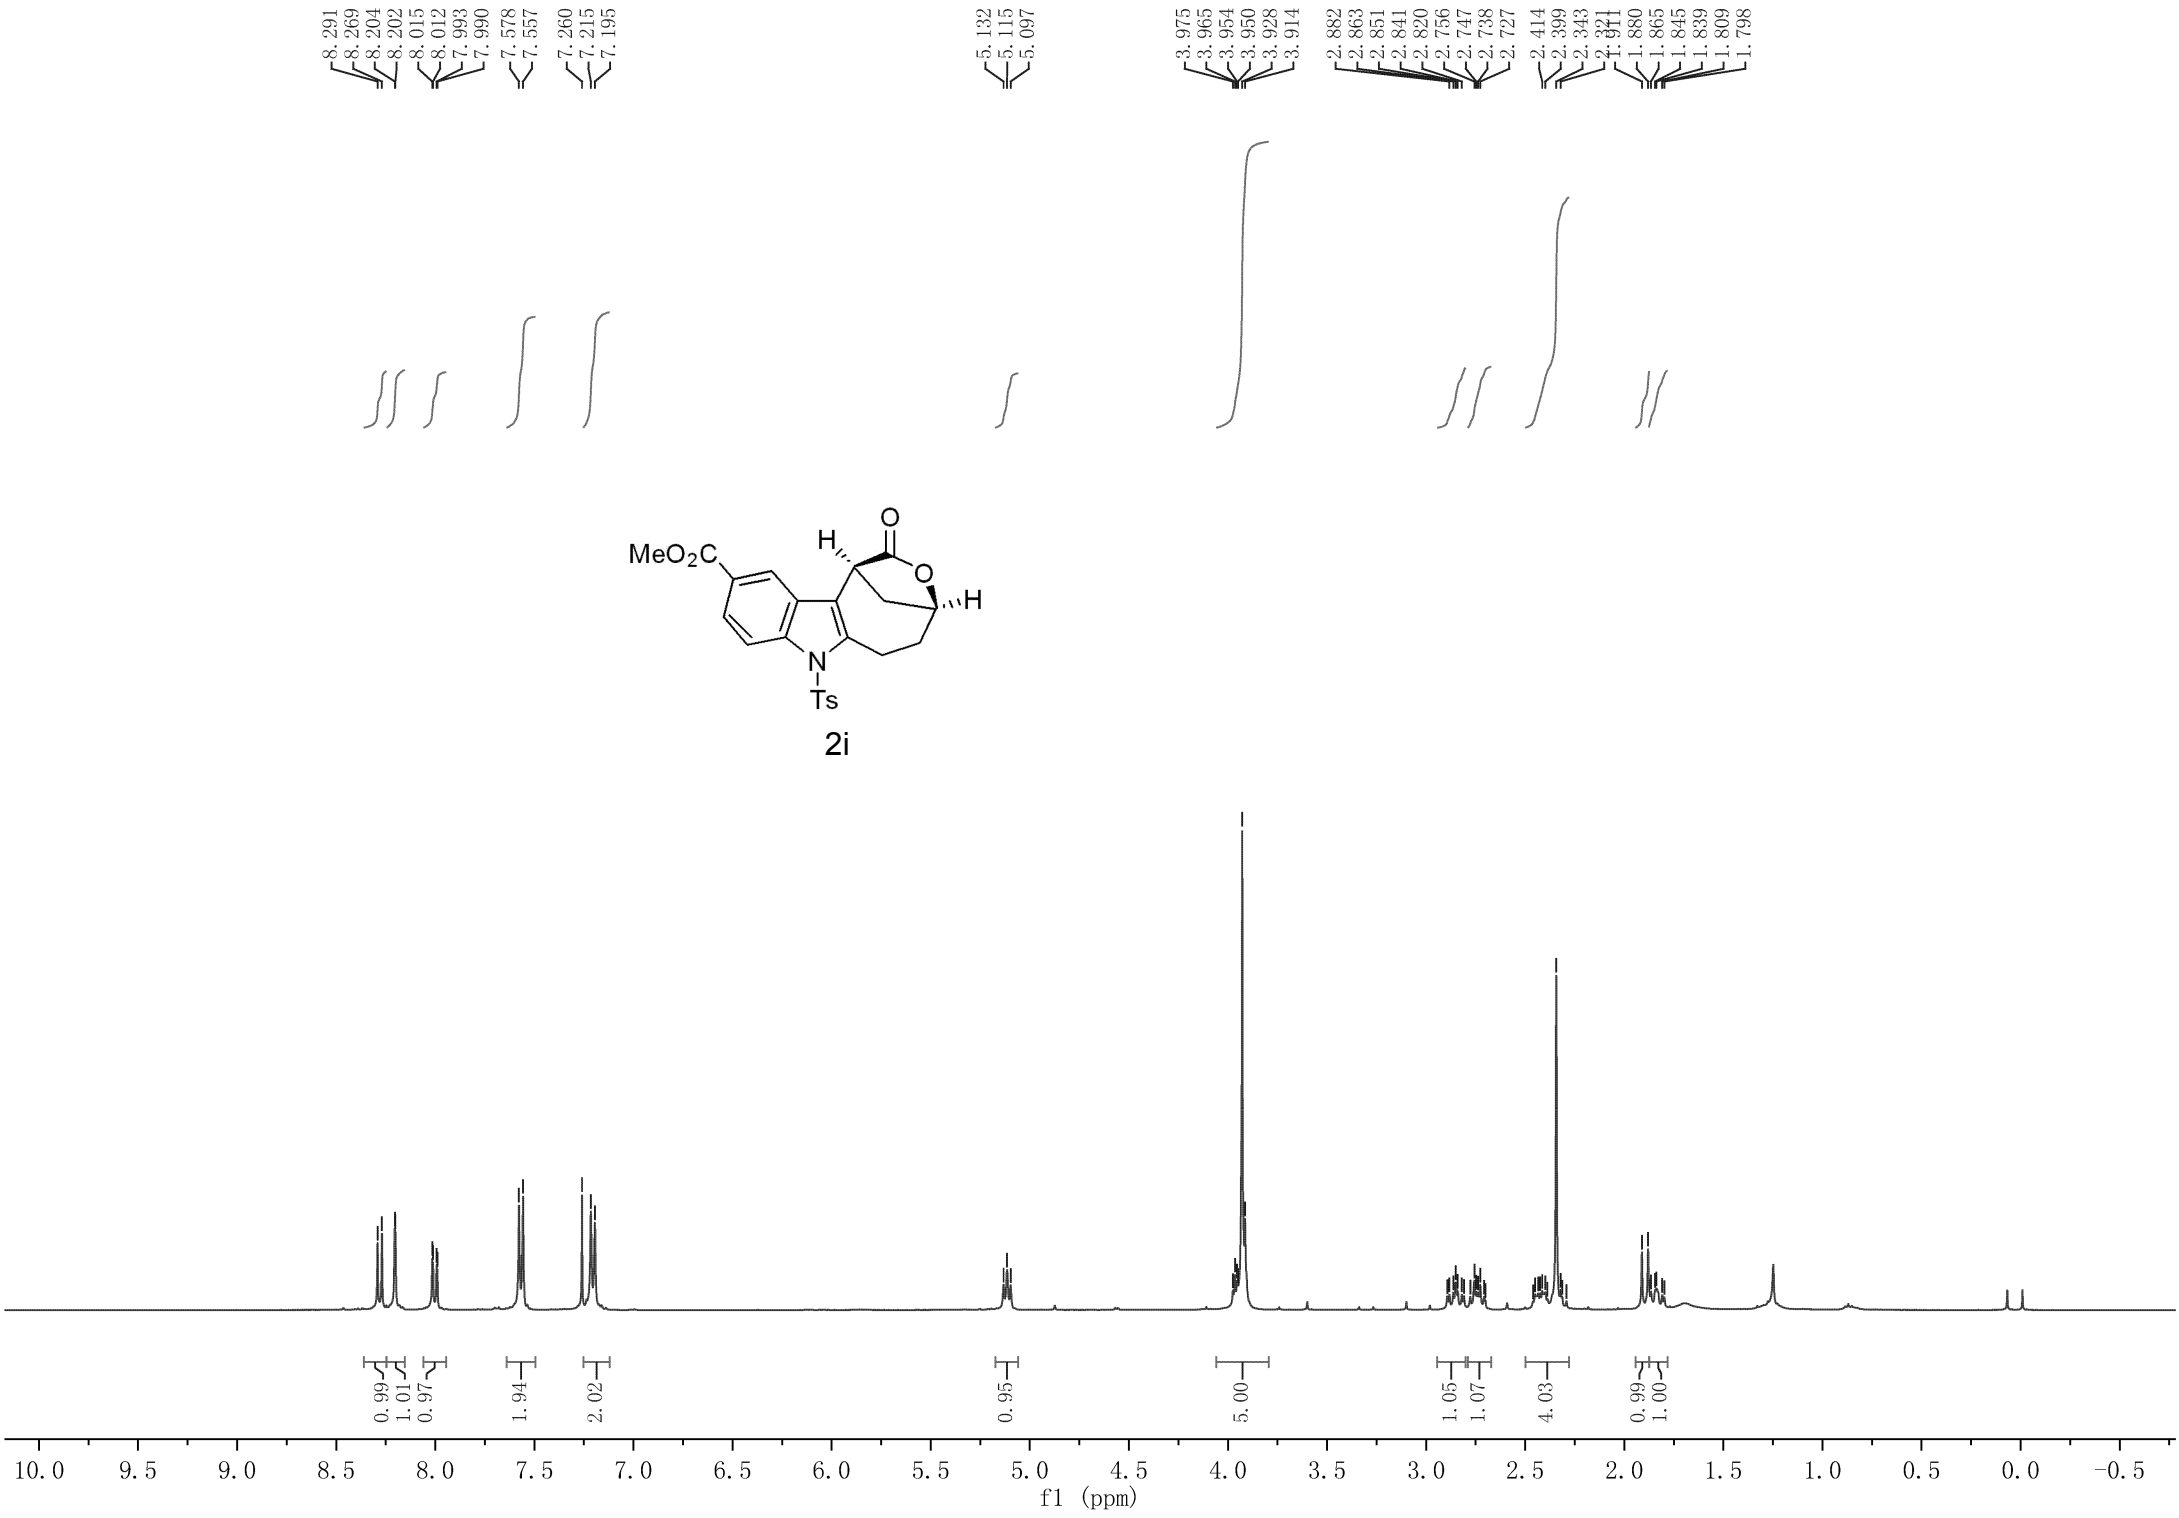

— 175.11  
— 166.94  
— 145.54  
138.79  
138.11  
135.60  
130.09  
128.26  
126.20  
125.96  
125.83  
121.41  
119.94  
115.03

78.32  
77.32  
77.00  
76.68

— 52.11

36.90  
35.81  
31.58

21.53  
19.84

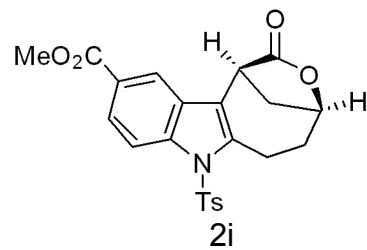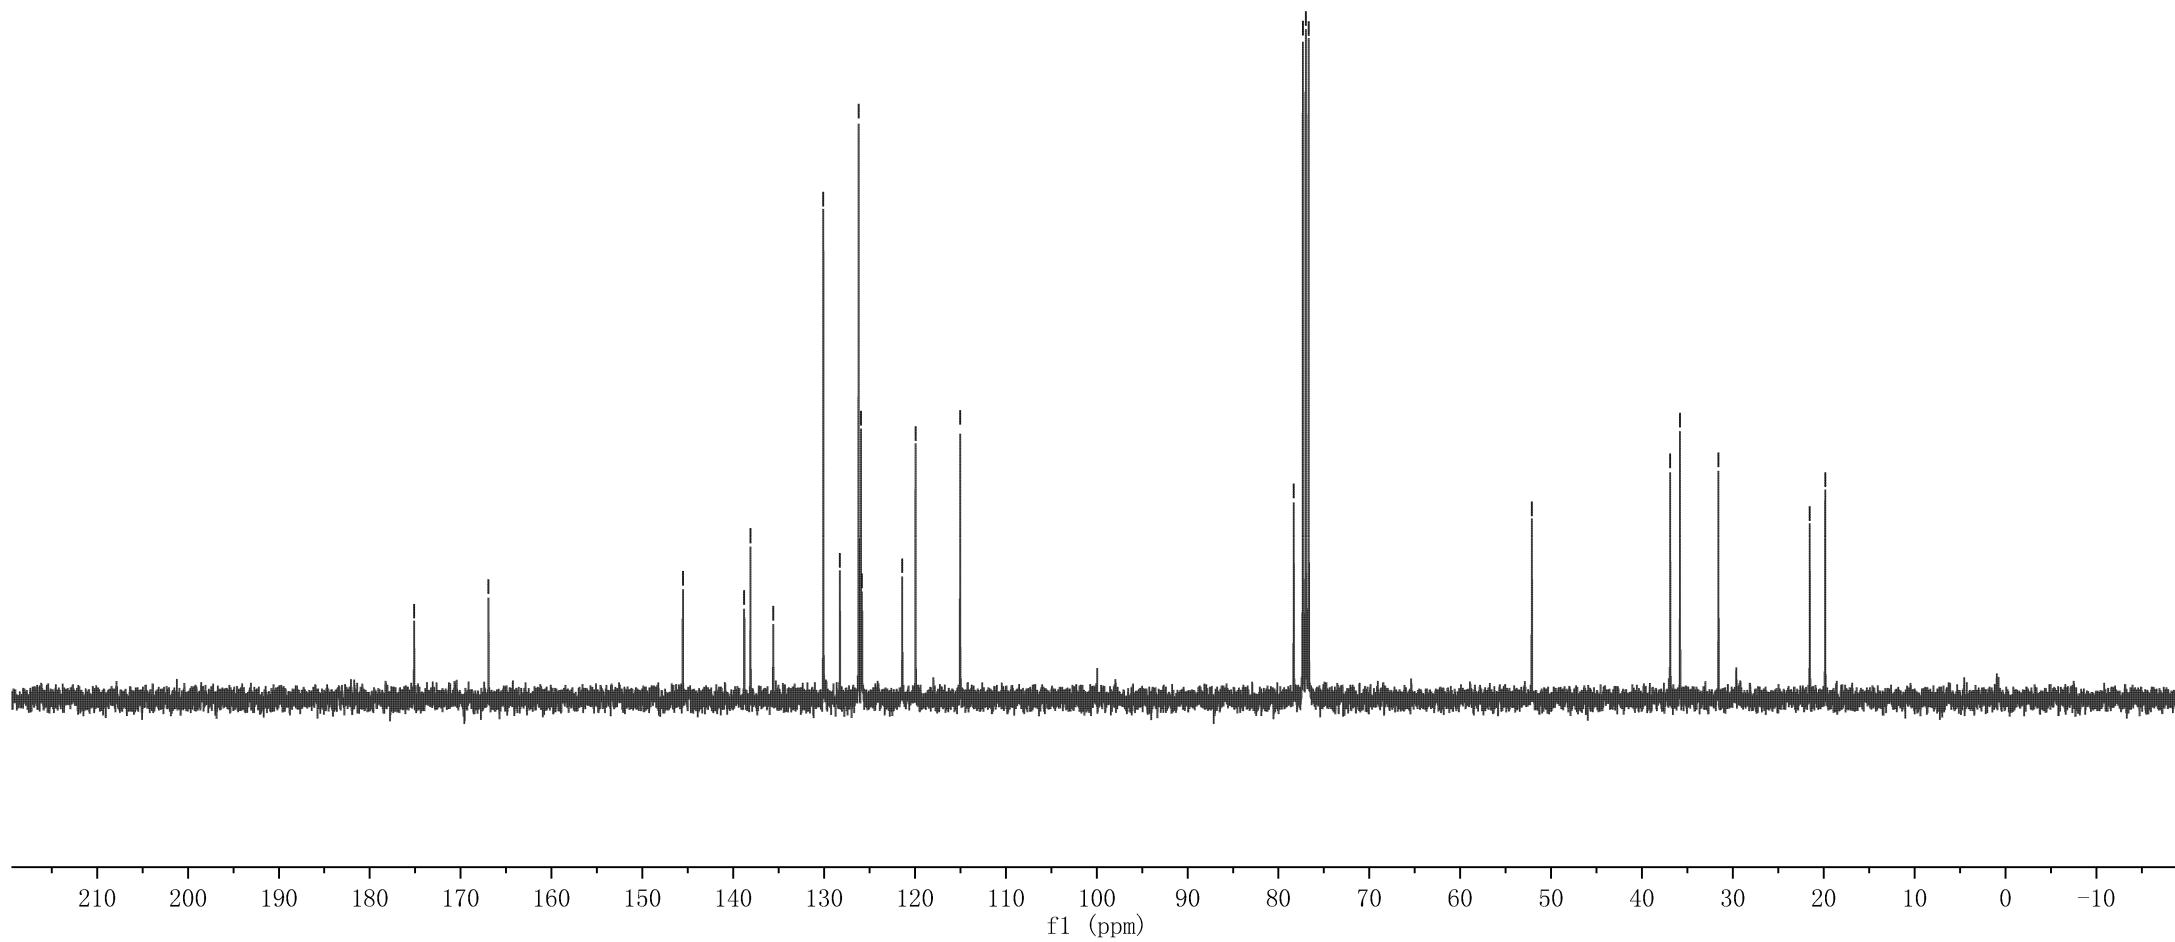



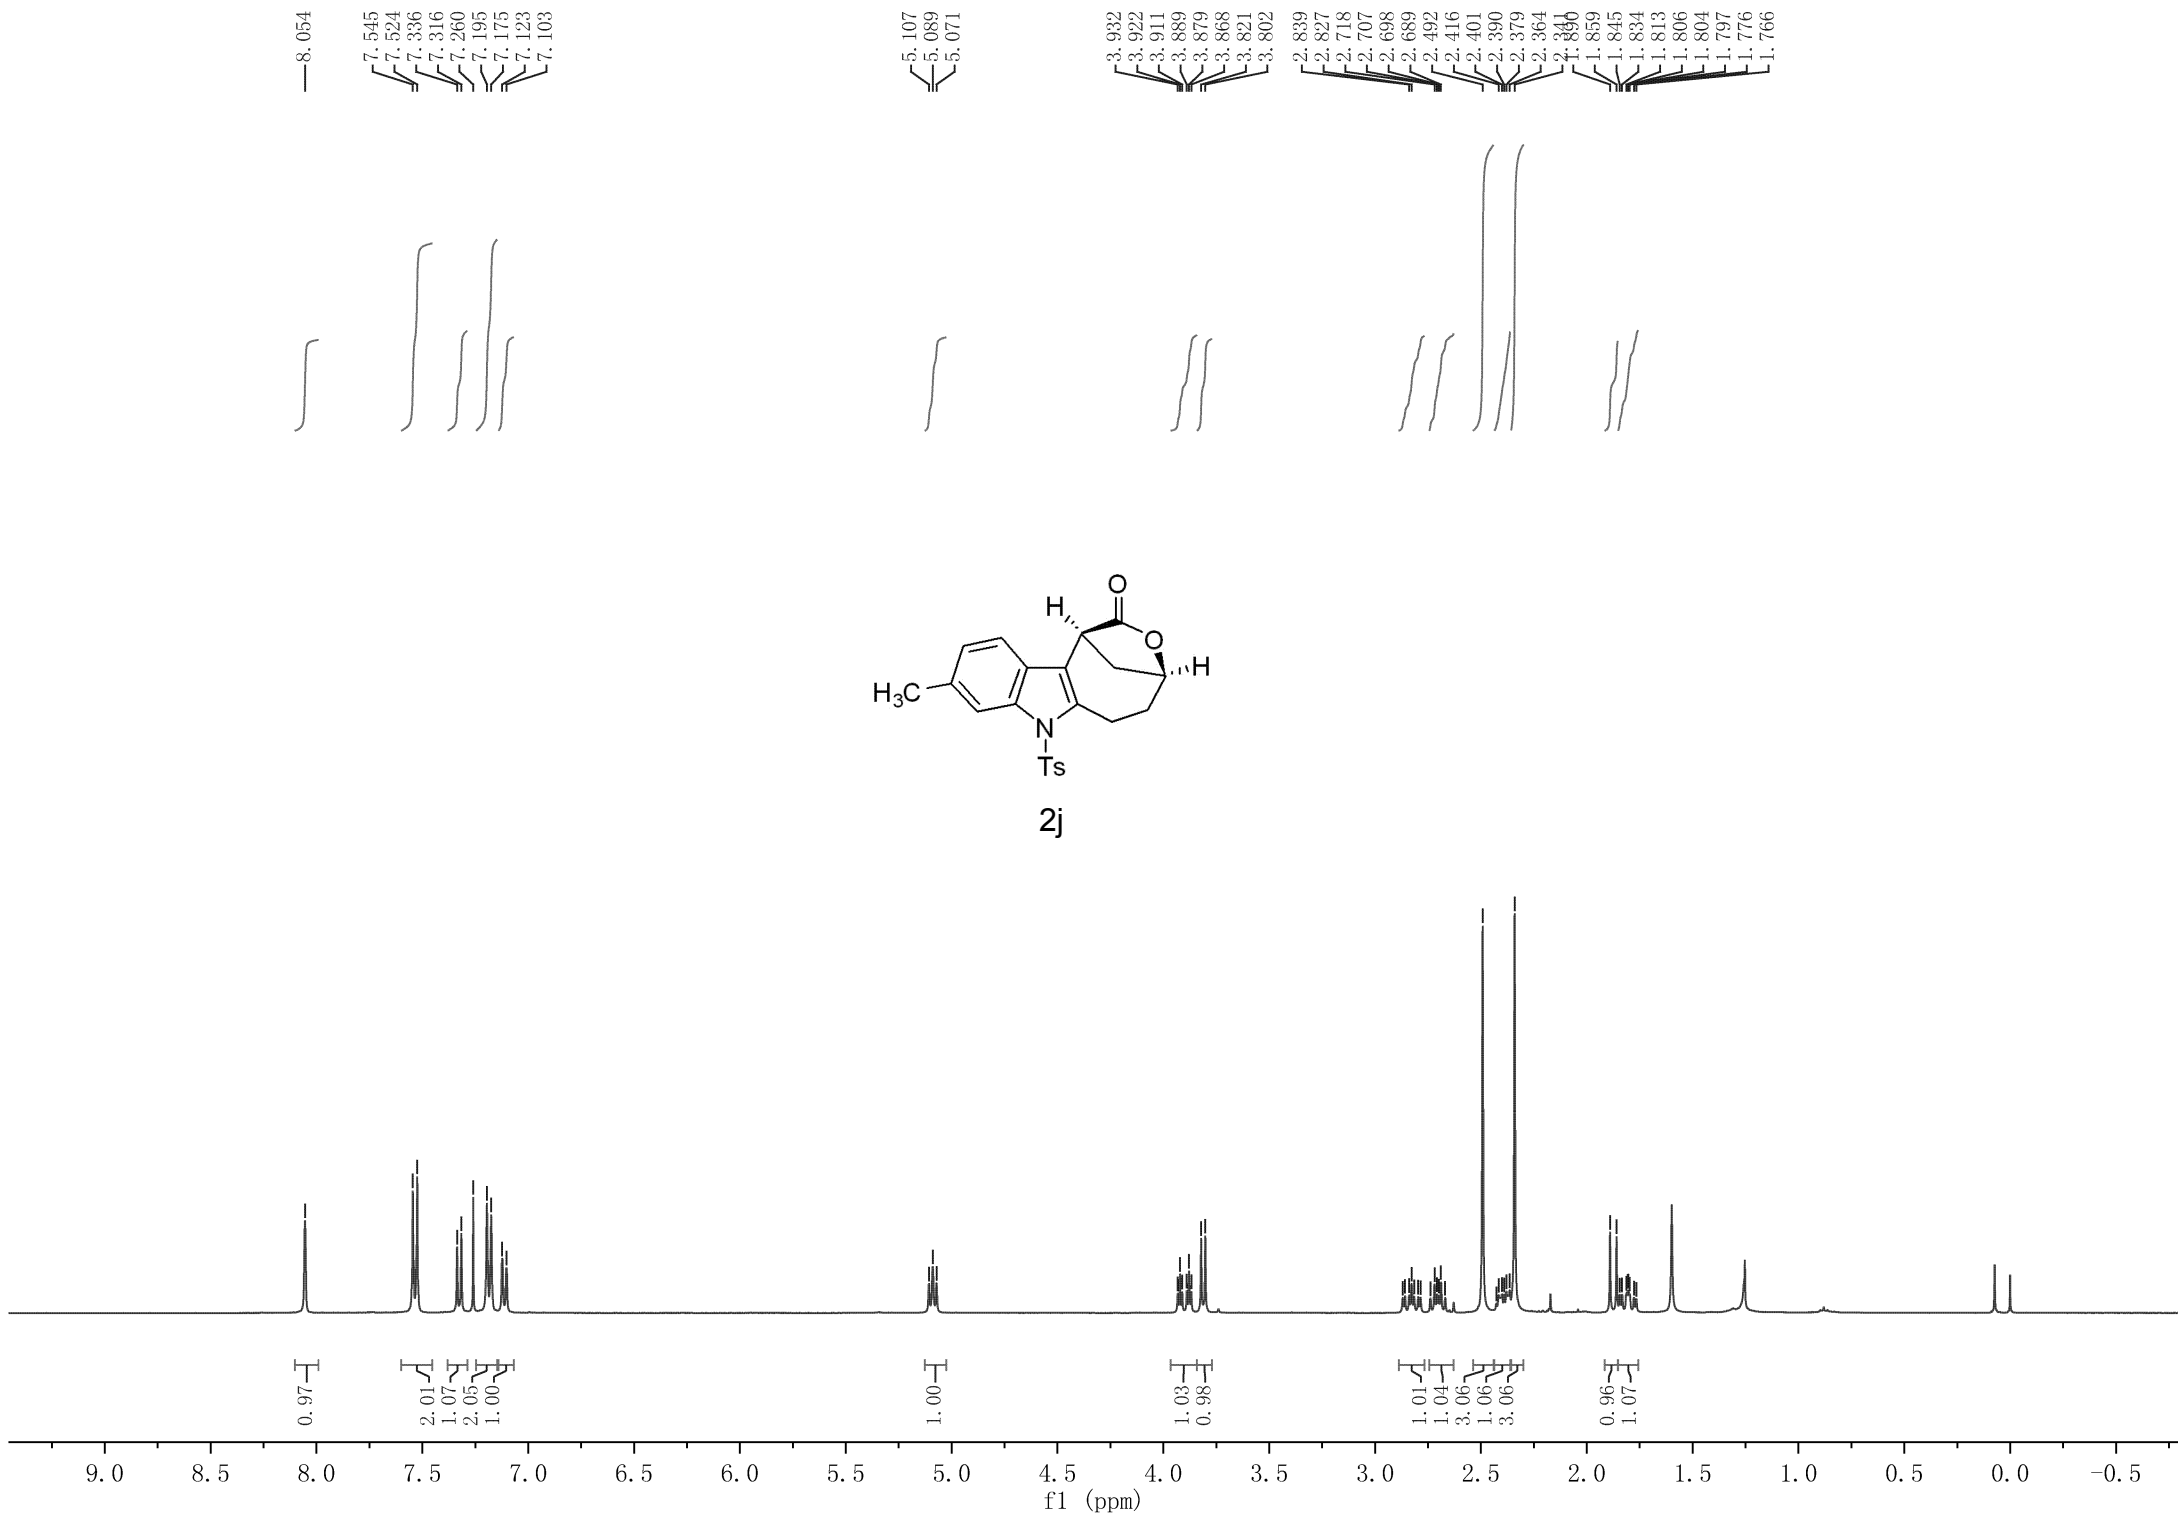

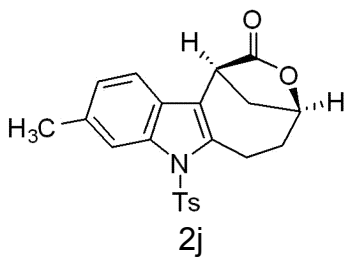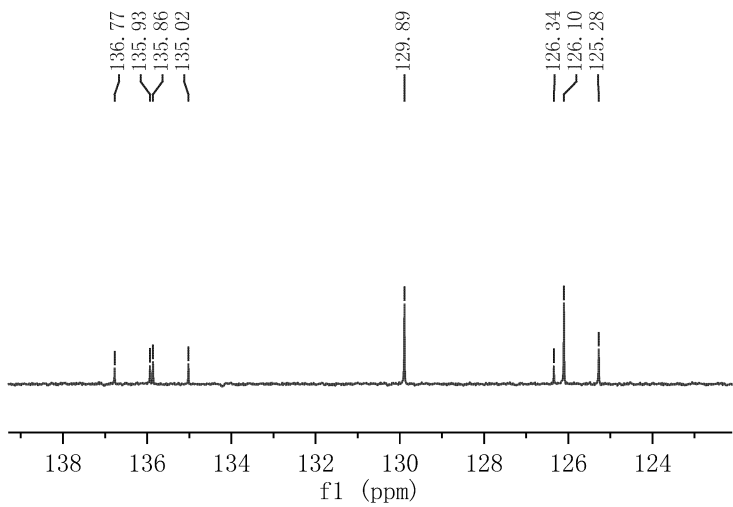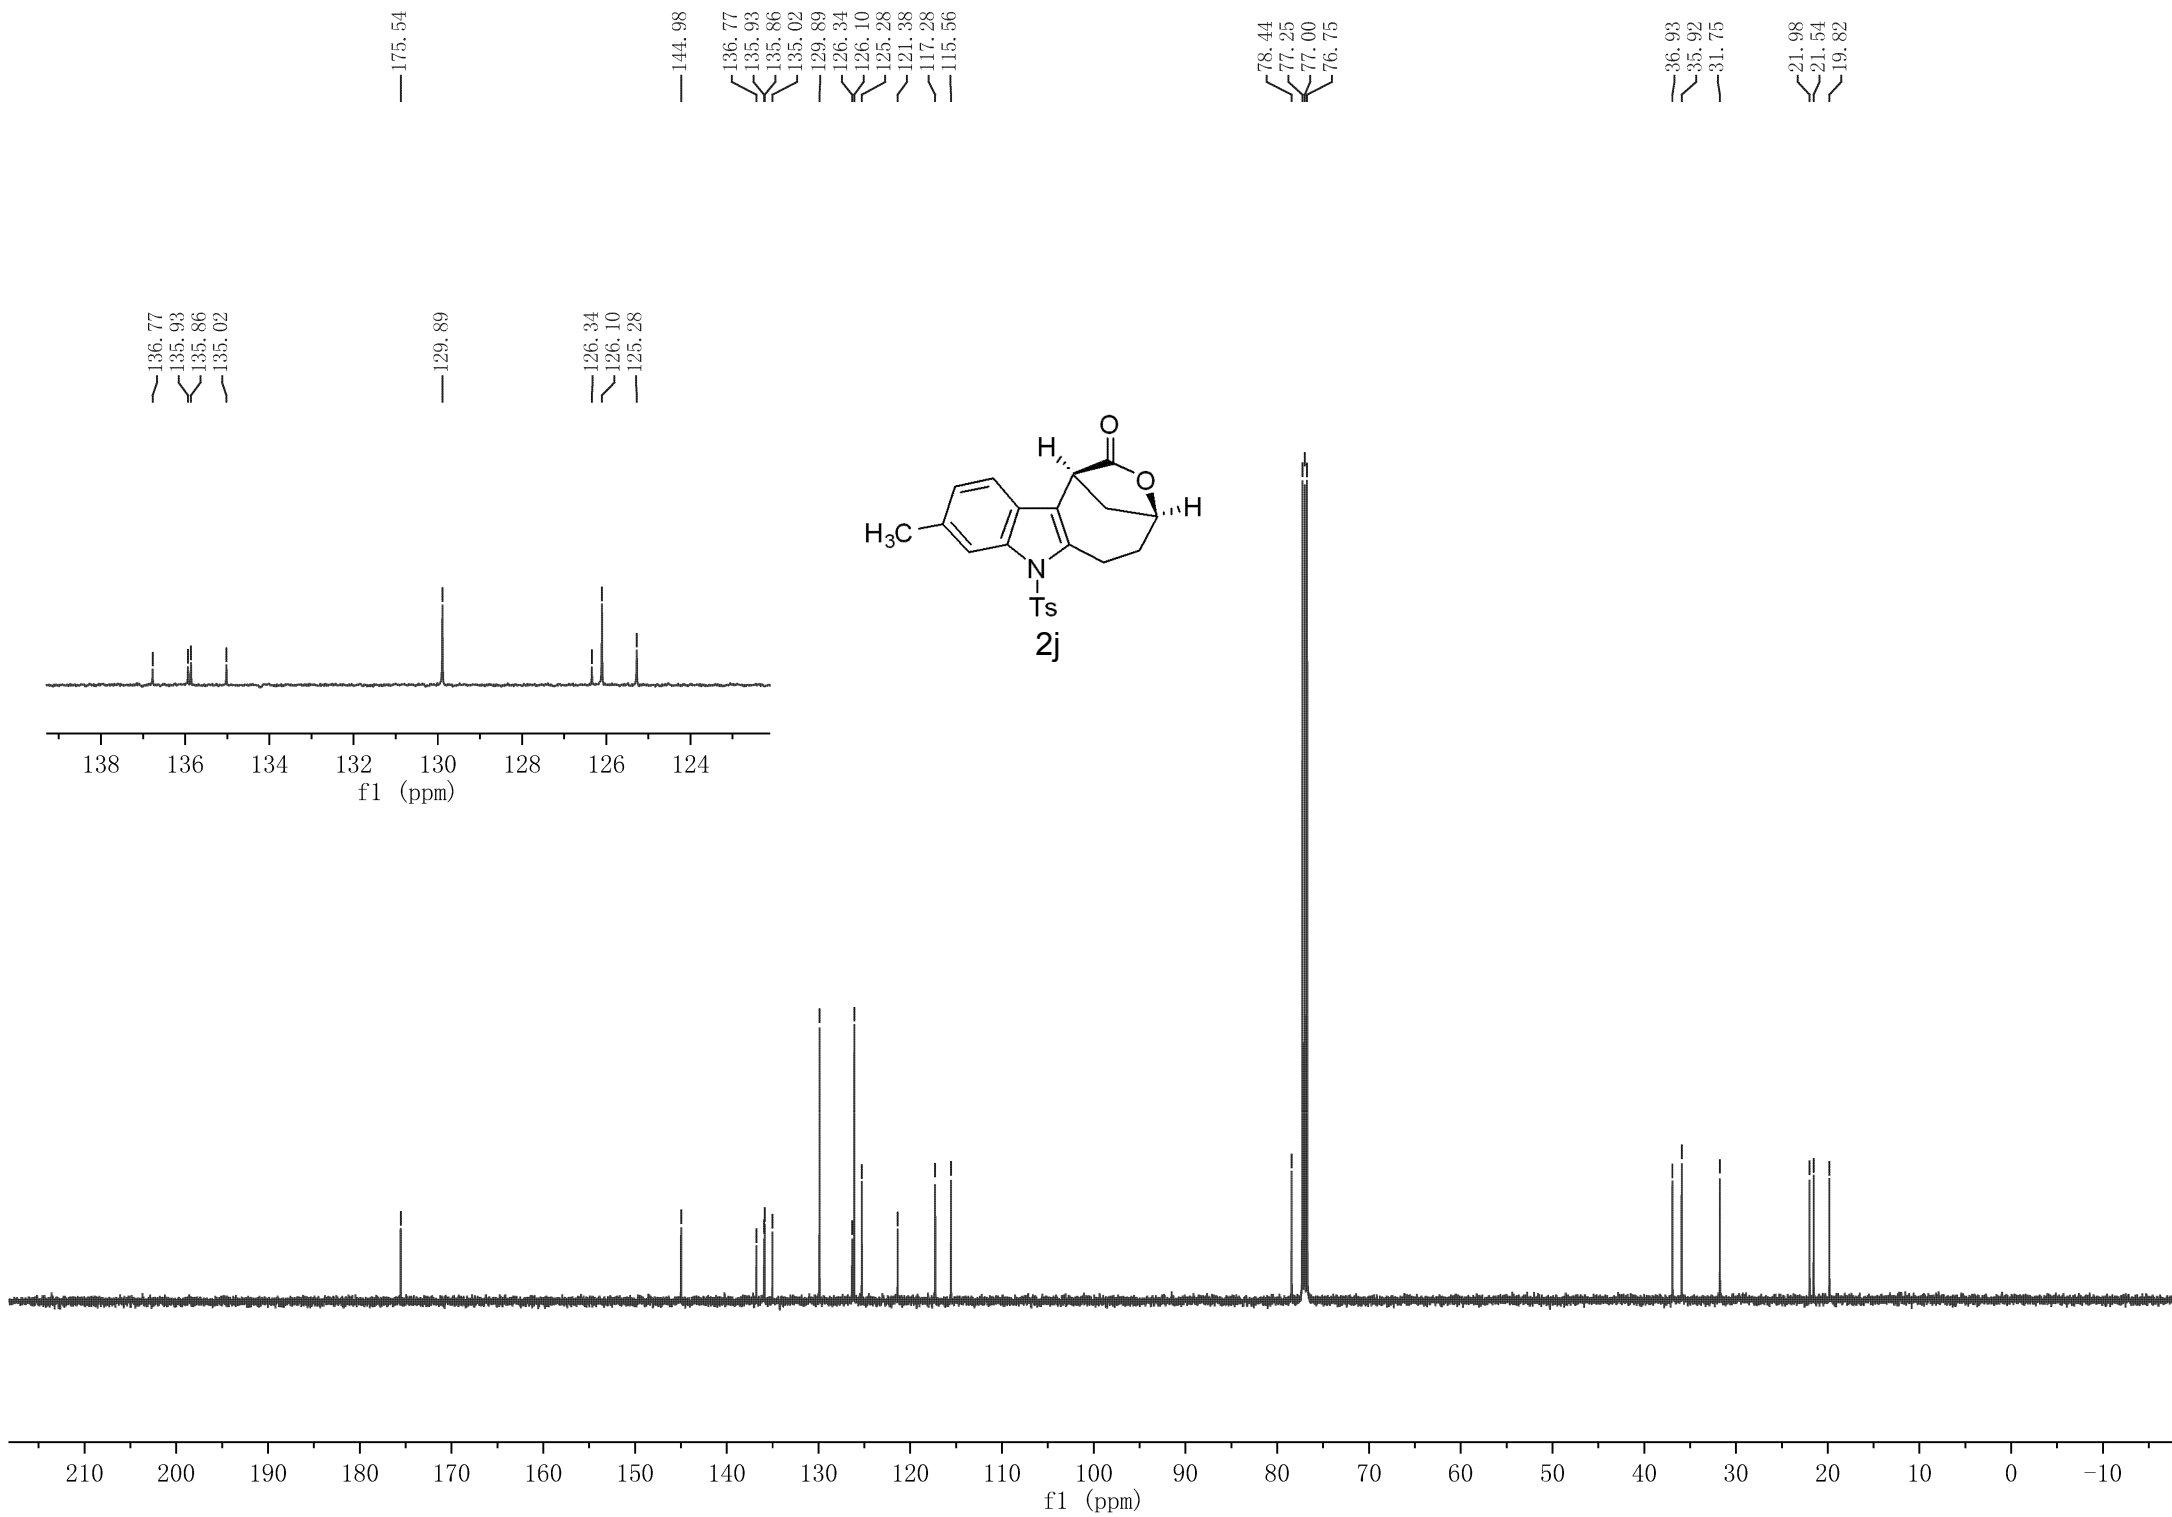

7.809  
7.805  
7.539  
7.522  
7.307  
7.260  
7.198  
7.181  
6.925  
6.912  
6.908

5.106  
5.092  
5.078

3.910  
3.902  
3.890  
3.876  
3.868  
3.859  
3.788  
3.772

2.845  
2.830  
2.820  
2.811  
2.796  
2.787  
2.716  
2.707  
2.691

2.397  
2.379  
2.367  
2.346  
2.336  
1.871  
1.836  
1.828  
1.812  
1.805  
1.800  
1.783  
1.774

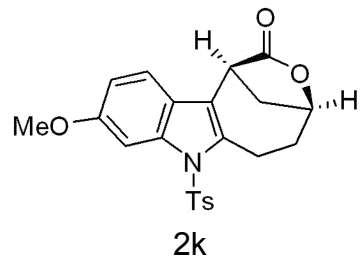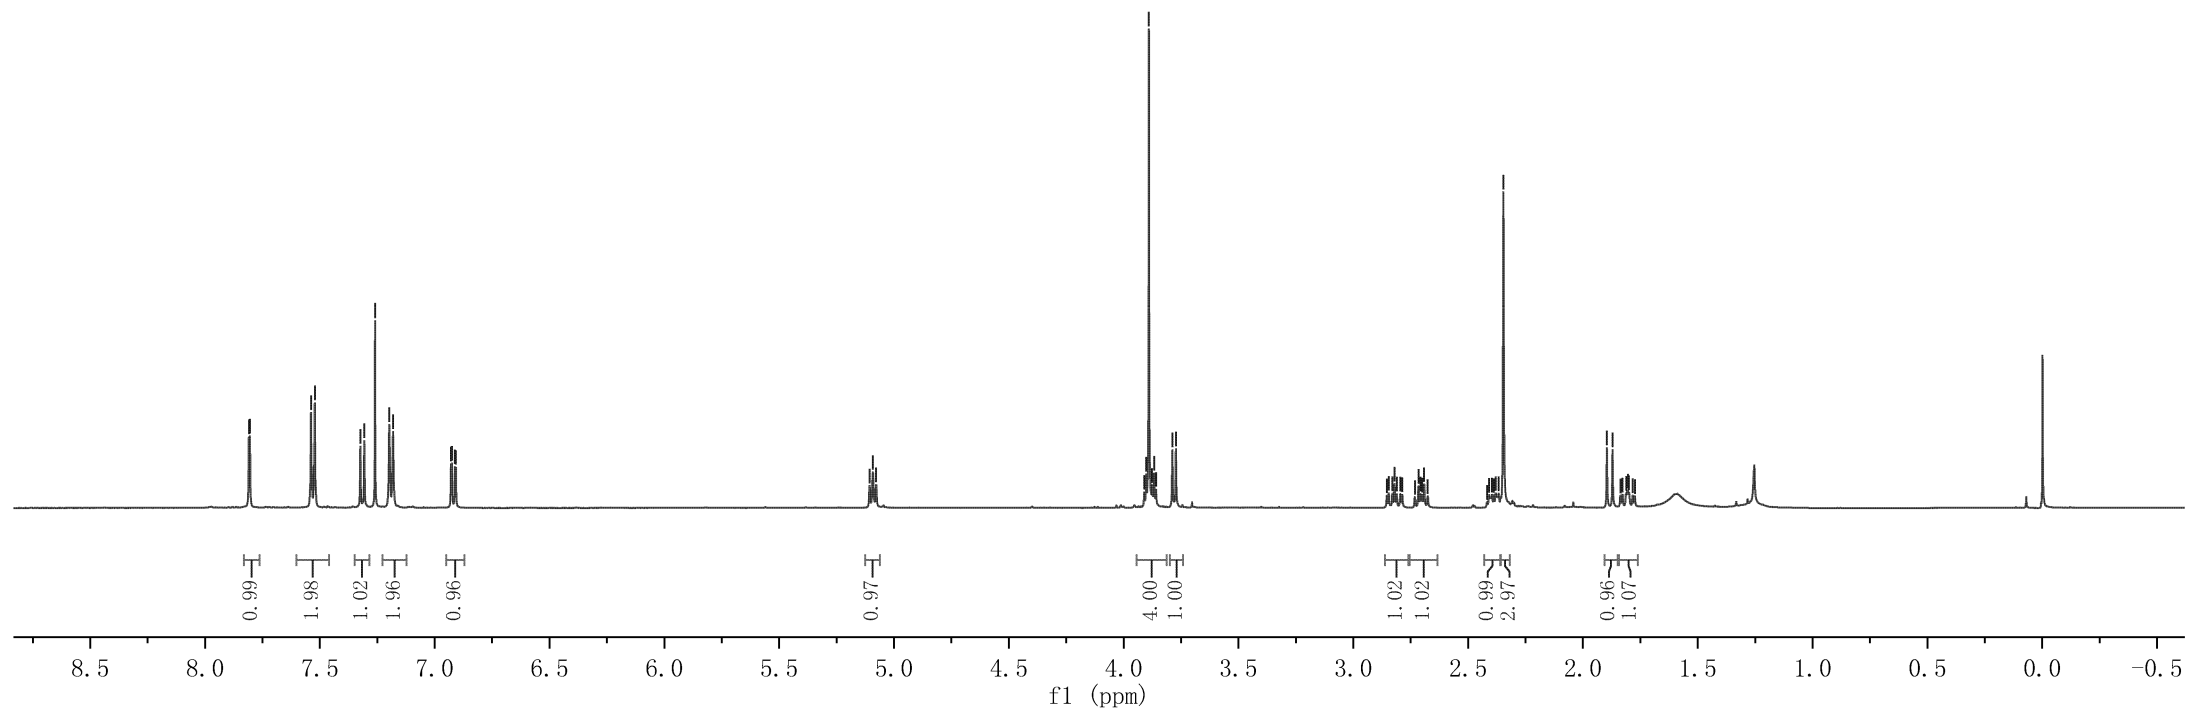

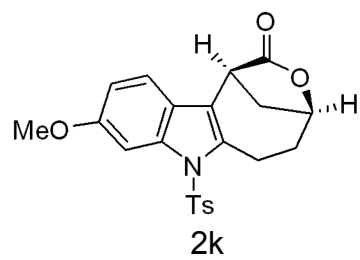

175.52  
158.12  
145.07  
137.40  
135.79  
135.17  
129.91  
126.10  
122.49  
121.37  
118.18  
112.83  
100.06  
78.48  
77.25  
77.00  
76.75  
55.84  
36.93  
35.97  
31.82  
21.56  
19.90

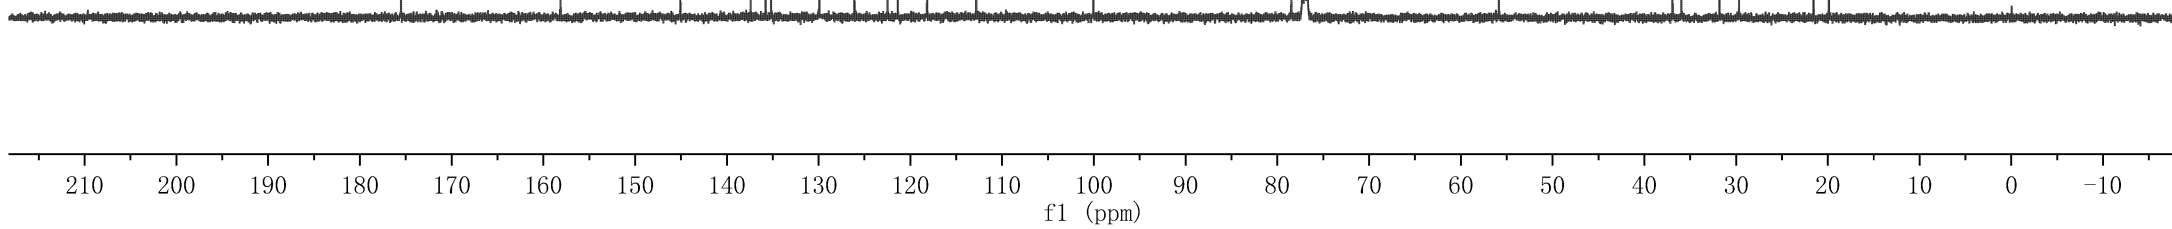

8.007  
8.002  
7.981  
7.976  
7.578  
7.574  
7.557  
7.396  
7.382  
7.374  
7.361  
7.260  
7.228  
7.208  
7.068  
7.063  
7.046  
7.041  
7.024  
7.019

5.126  
5.108  
5.091

3.940  
3.930  
3.919  
3.897  
3.887  
3.876  
3.808  
3.789

2.847  
2.836  
2.739  
2.737  
2.728  
2.726  
2.719  
2.717  
2.708

2.407  
2.396  
2.382  
2.359  
2.319  
1.889  
1.875  
1.864  
1.843  
1.836  
1.828  
1.808  
1.797

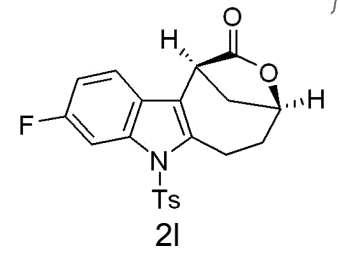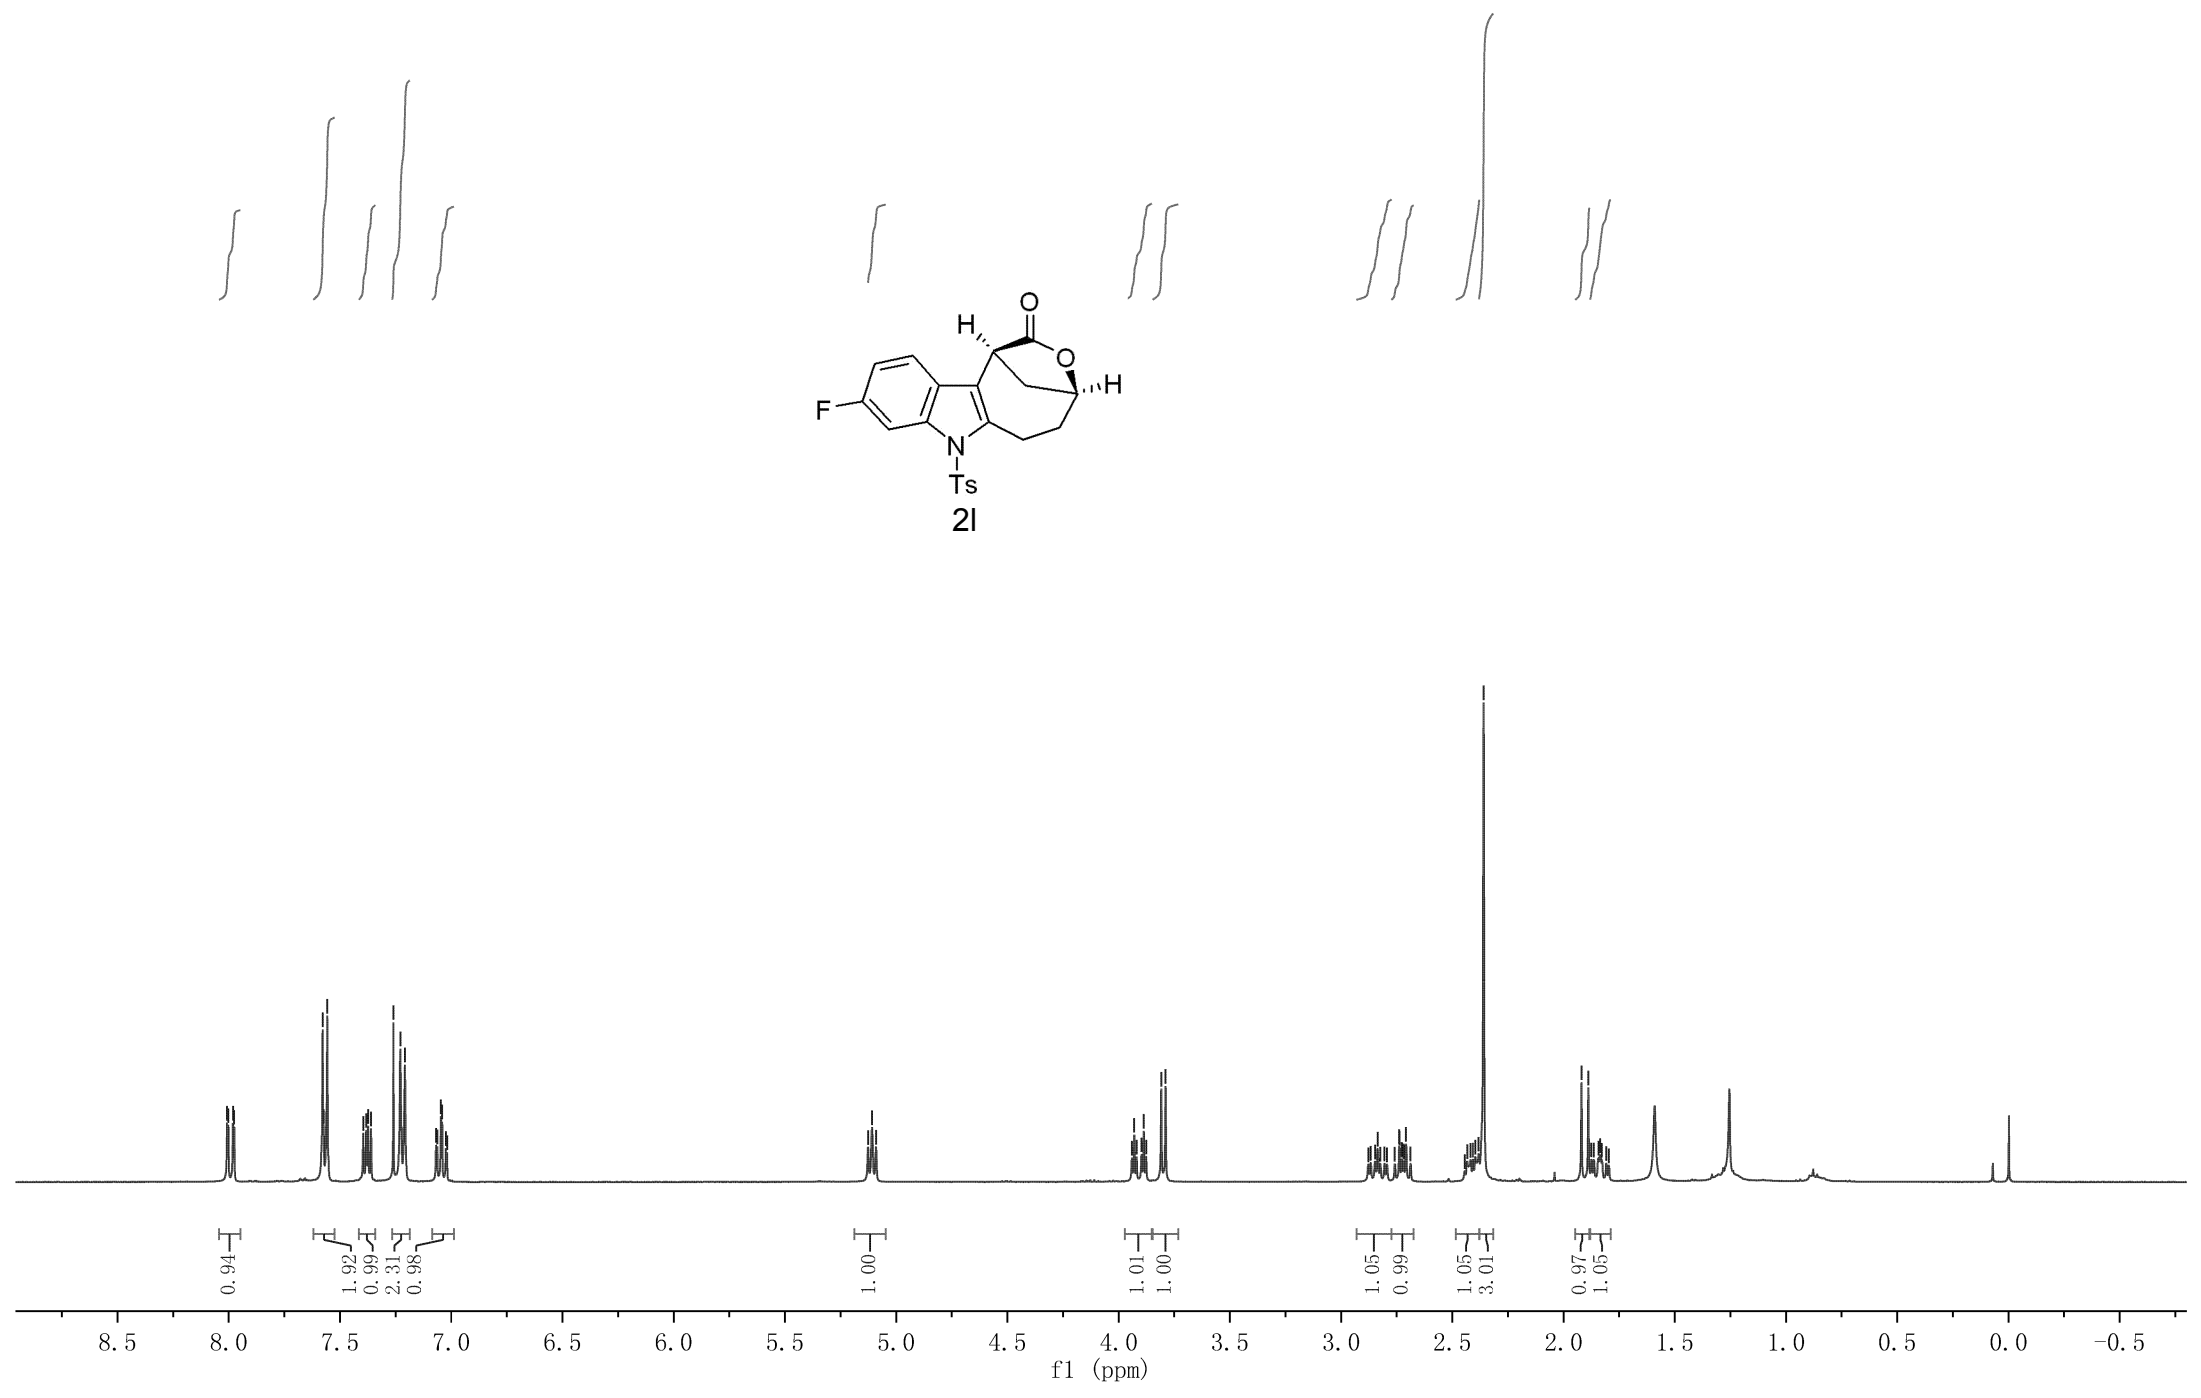

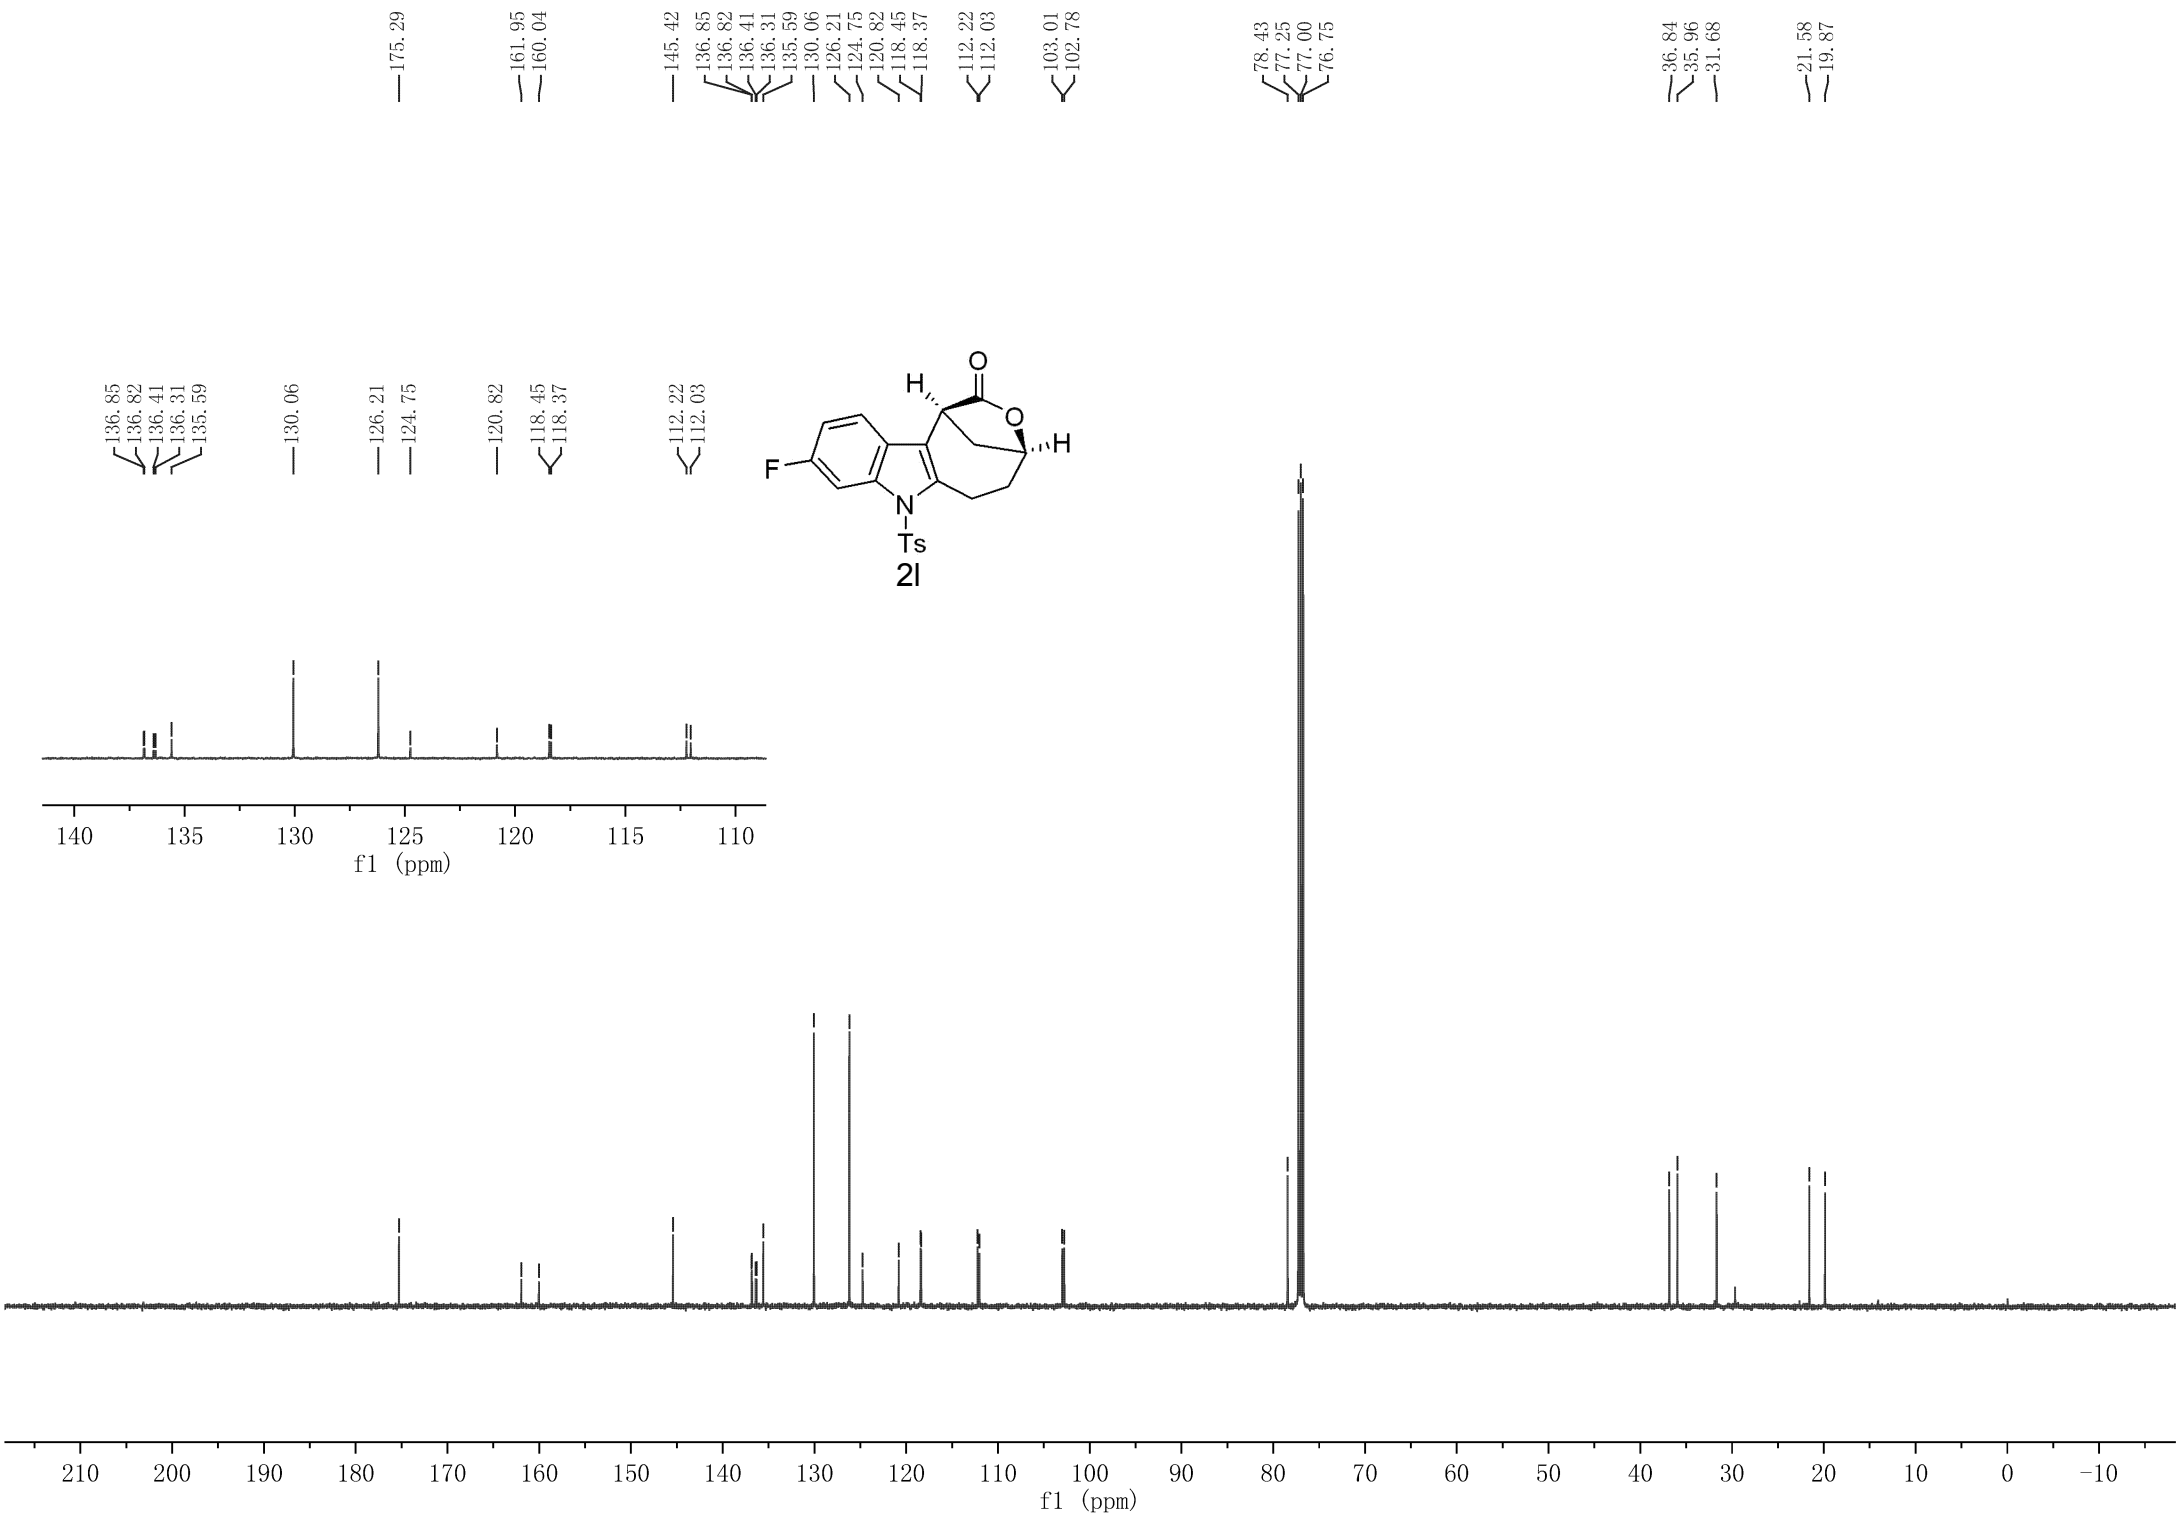

8.175  
8.153  
7.548  
7.527  
7.439  
7.434  
7.286  
7.281  
7.264  
7.260  
7.215  
7.195

5.124  
5.106  
5.088

3.960  
3.950  
3.939  
3.917  
3.907  
3.896  
3.776  
3.756

2.878  
2.859  
2.847  
2.835  
2.816  
2.737  
2.726  
2.718  
2.706

2.427  
2.405  
2.391  
2.385  
2.385  
1.864  
1.838  
1.830  
1.822  
1.802  
1.791

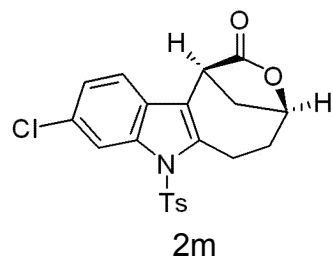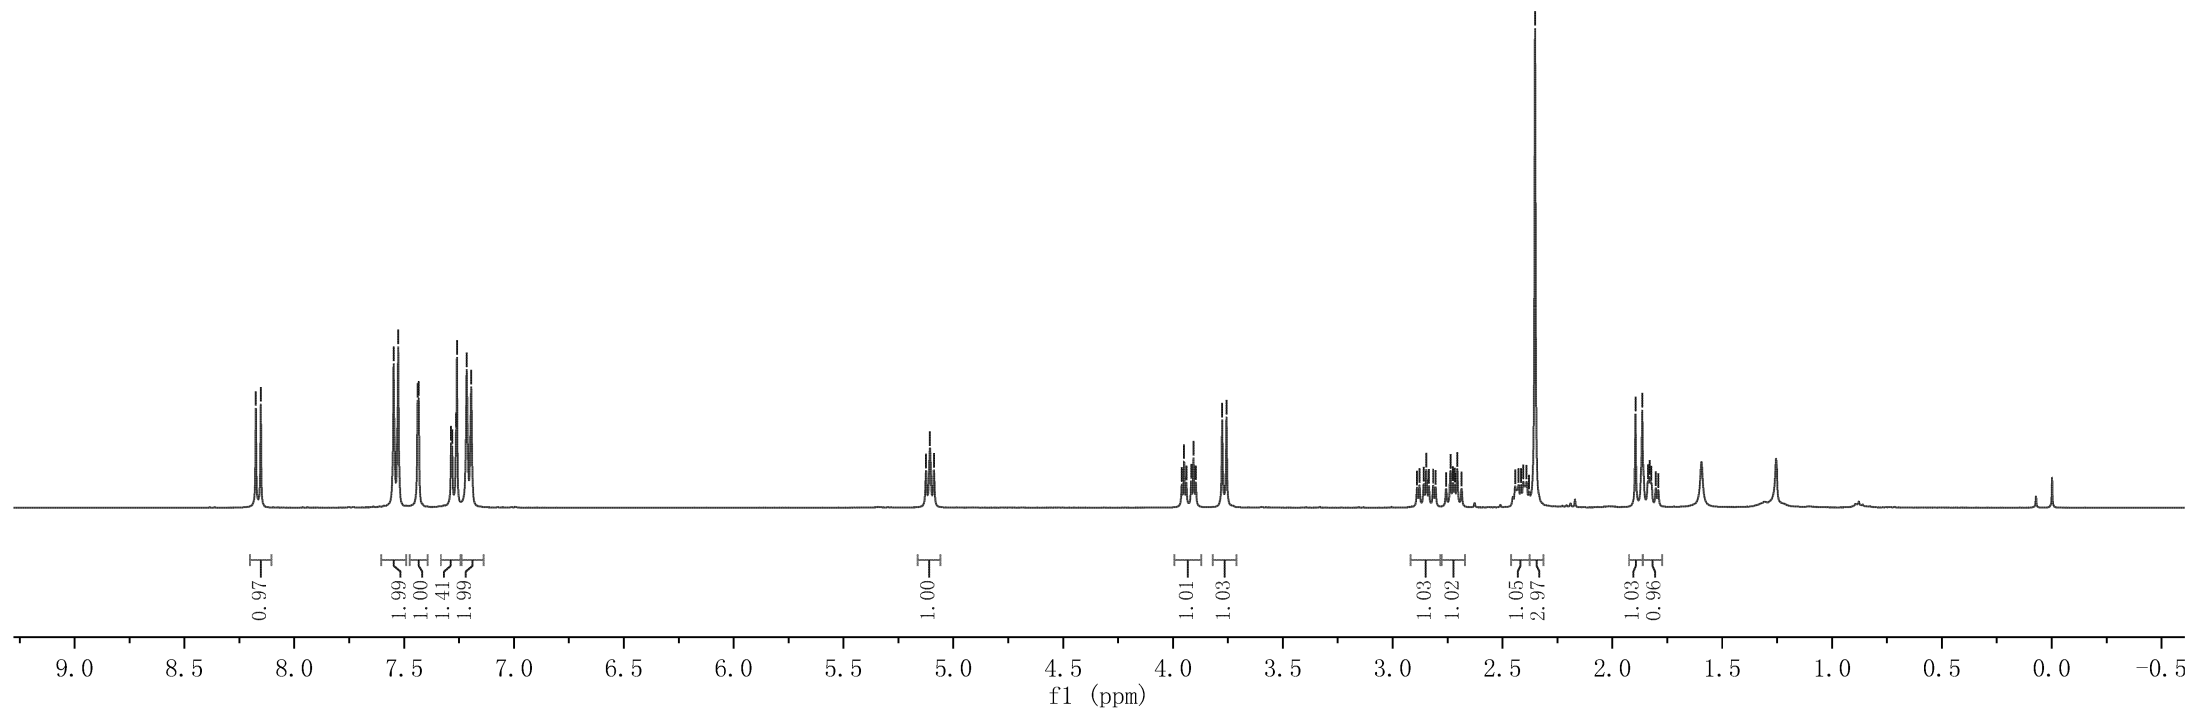

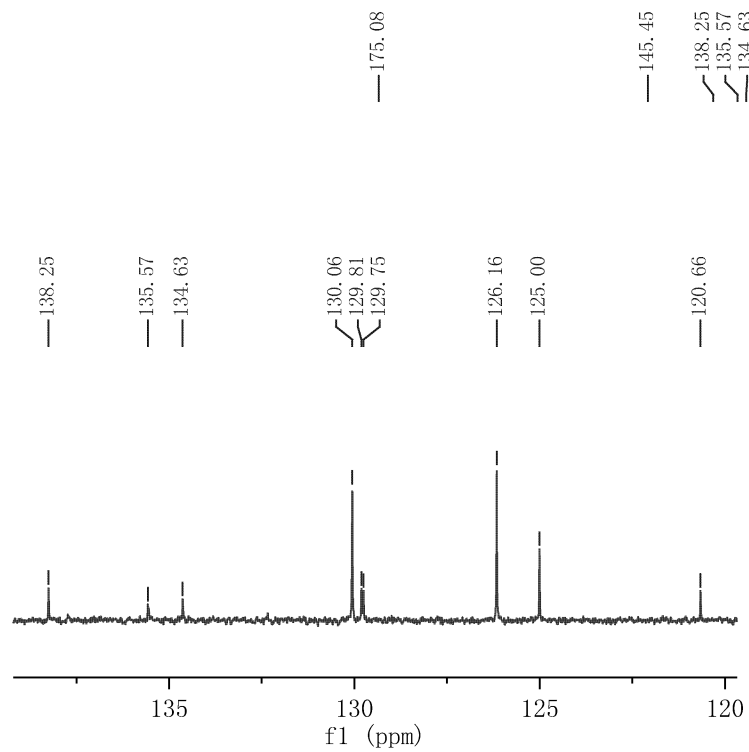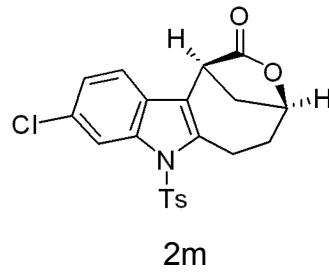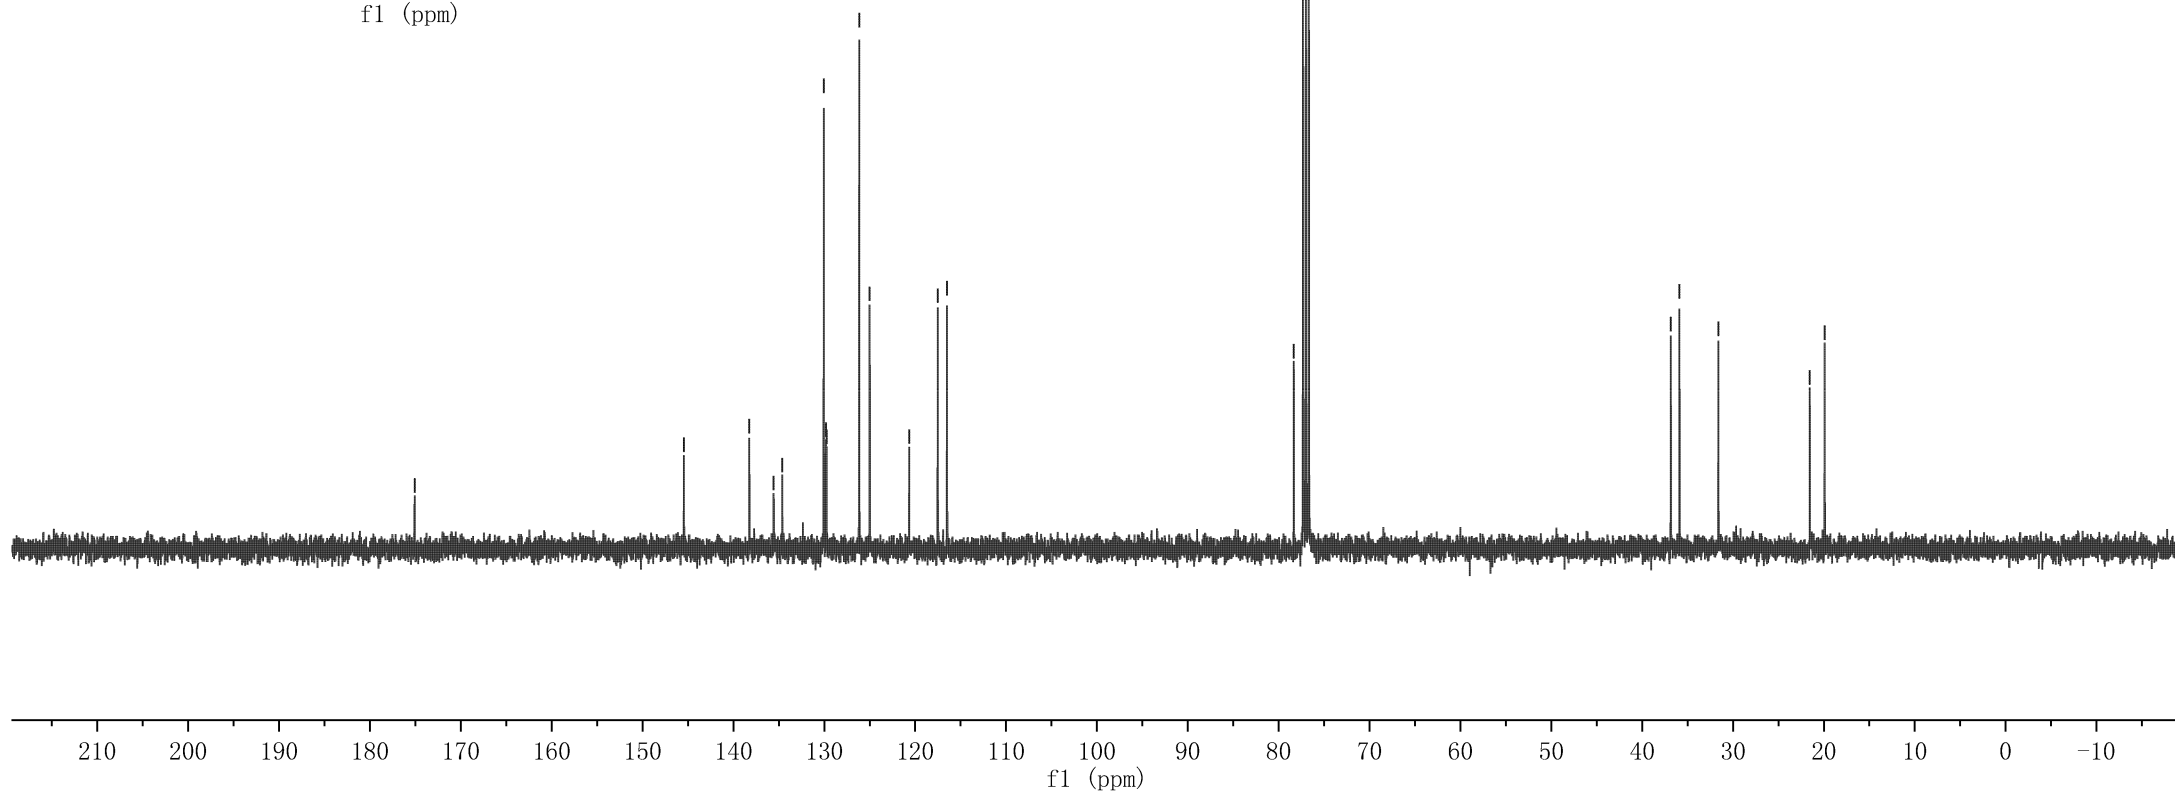



8.438  
8.435

7.576  
7.555  
7.416  
7.412  
7.395  
7.391  
7.327  
7.306  
7.260  
7.237  
7.217

5.121  
5.103  
5.086

3.925  
3.914  
3.903  
3.882  
3.871  
3.860  
3.801  
3.781

2.840  
2.821  
2.809  
2.778  
2.734  
2.723  
2.705  
2.704

2.405  
2.394  
2.378  
2.363  
1.875  
1.870  
1.858  
1.856  
1.837  
1.828  
1.821  
1.800  
1.789

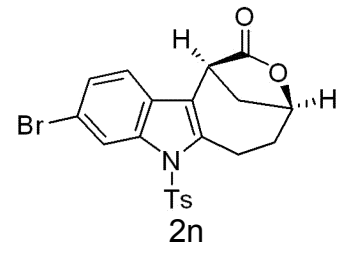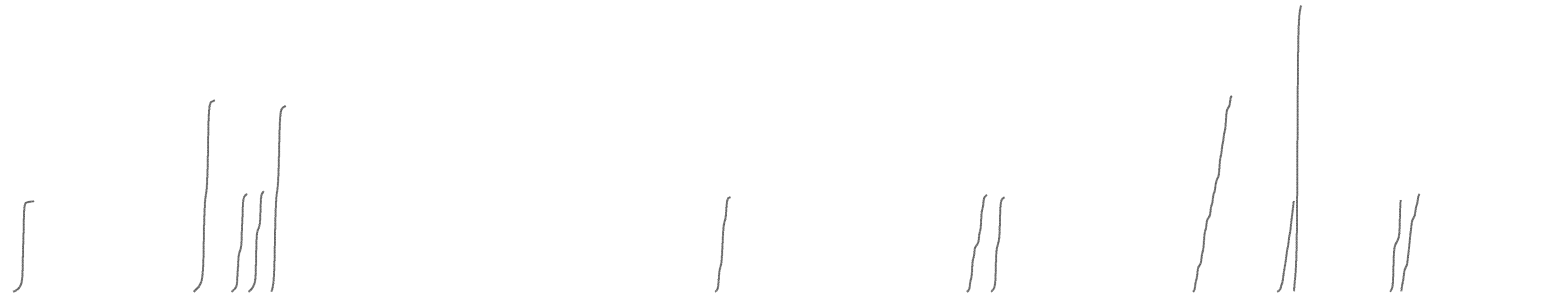

0.96

2.02  
1.03  
1.06  
1.96

1.00

1.02  
1.00

2.07

0.96  
3.03

0.97  
1.03

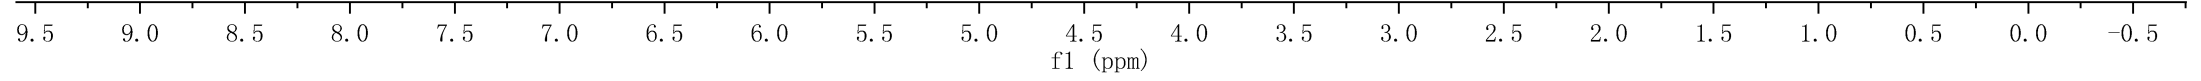

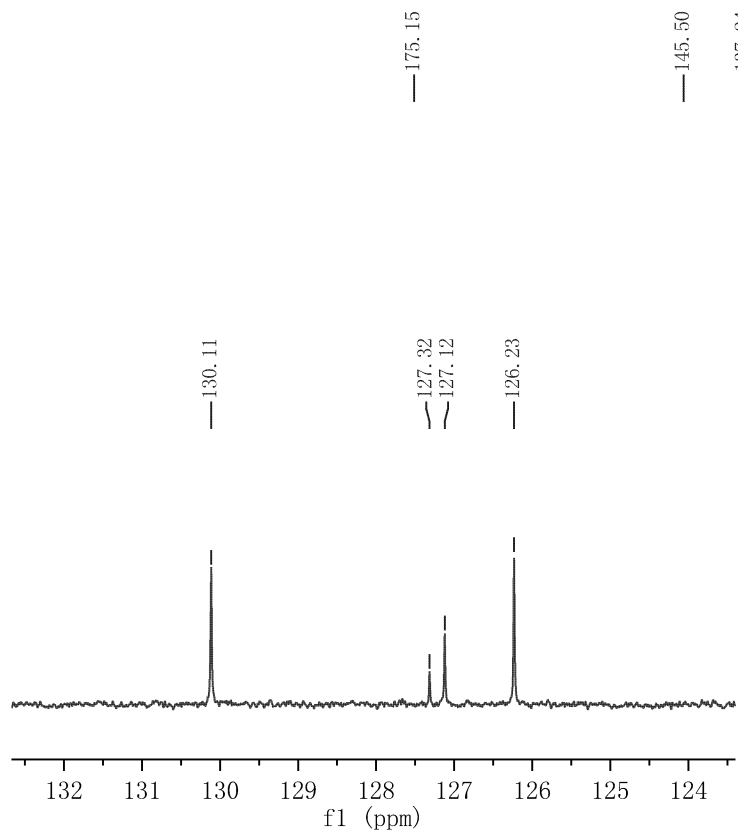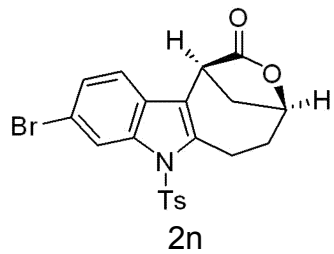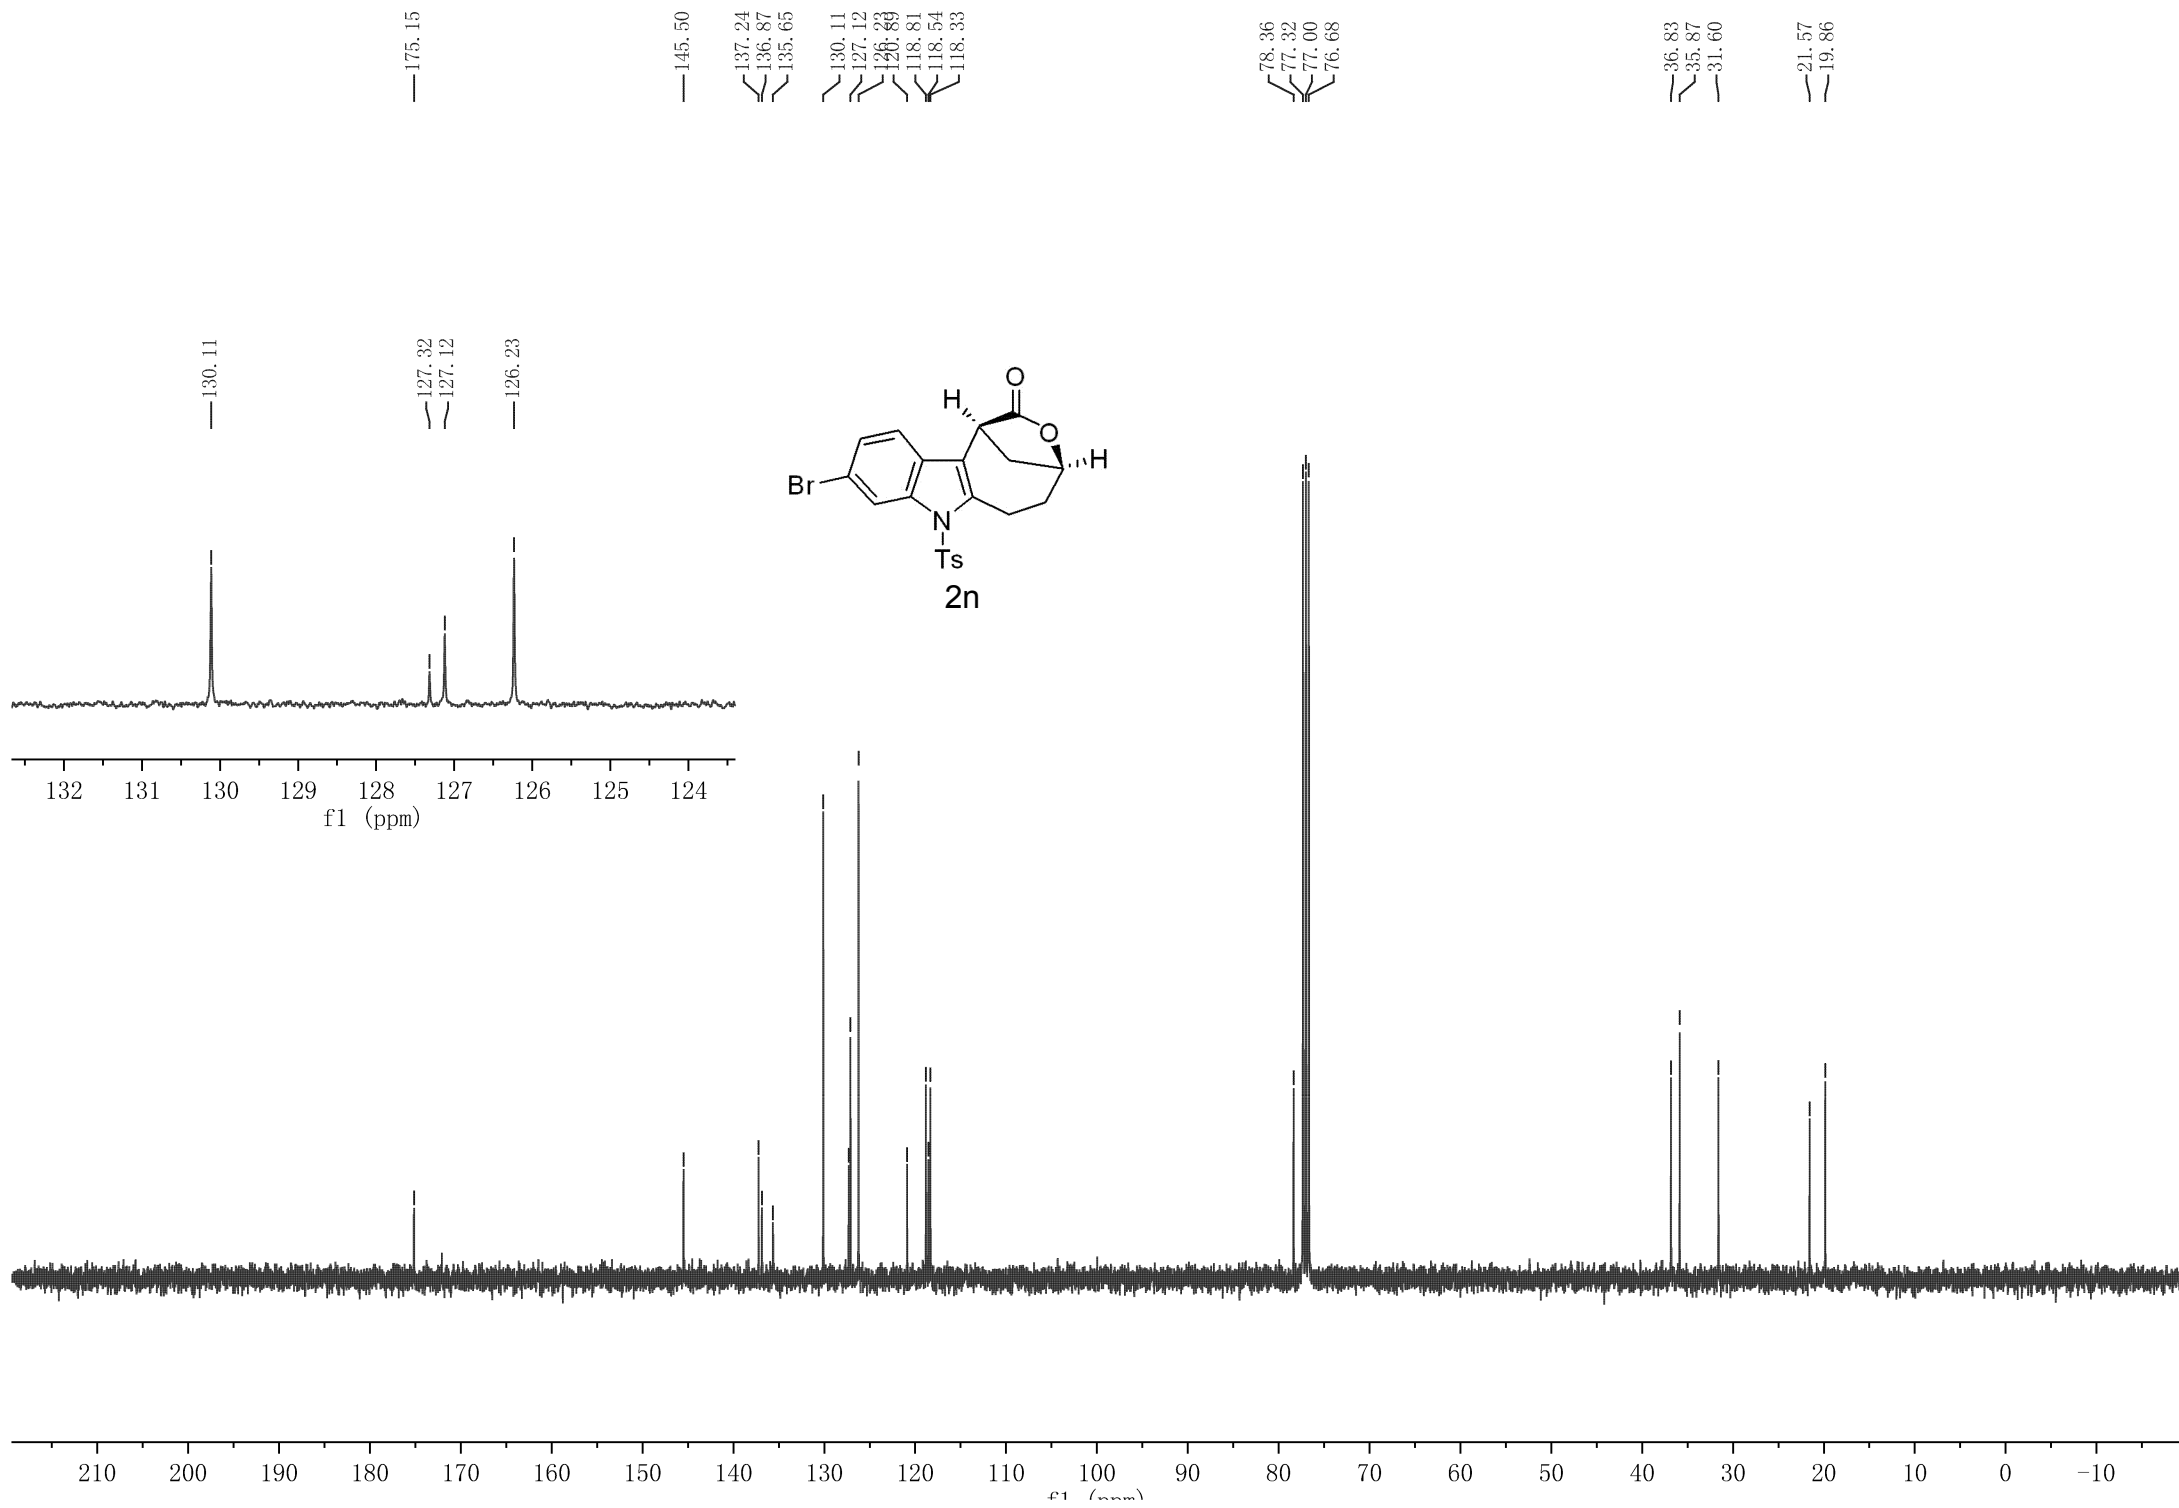

—8.929

7.979  
7.976  
7.958  
7.955

7.591  
7.570  
7.486  
7.210  
7.190

5.127  
5.109  
5.091

4.002  
3.992  
3.981  
3.954  
3.872  
3.852

2.899  
2.880  
2.868  
2.856  
2.837  
2.748  
2.737  
2.728  
2.717  
2.432  
2.410  
2.395  
2.333  
1.886  
1.876  
1.854  
1.847  
1.819  
1.808

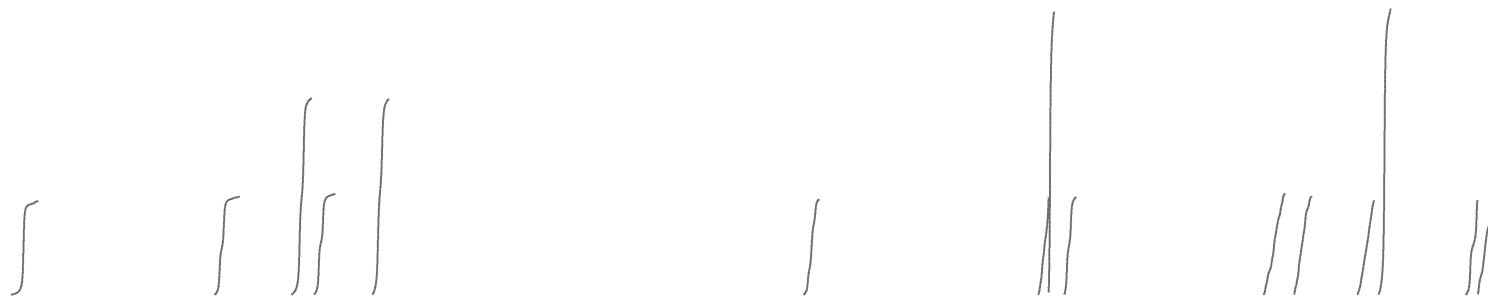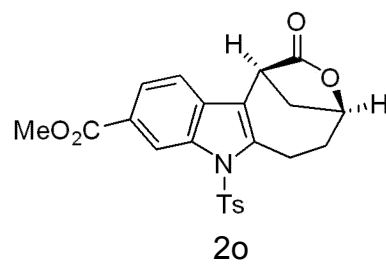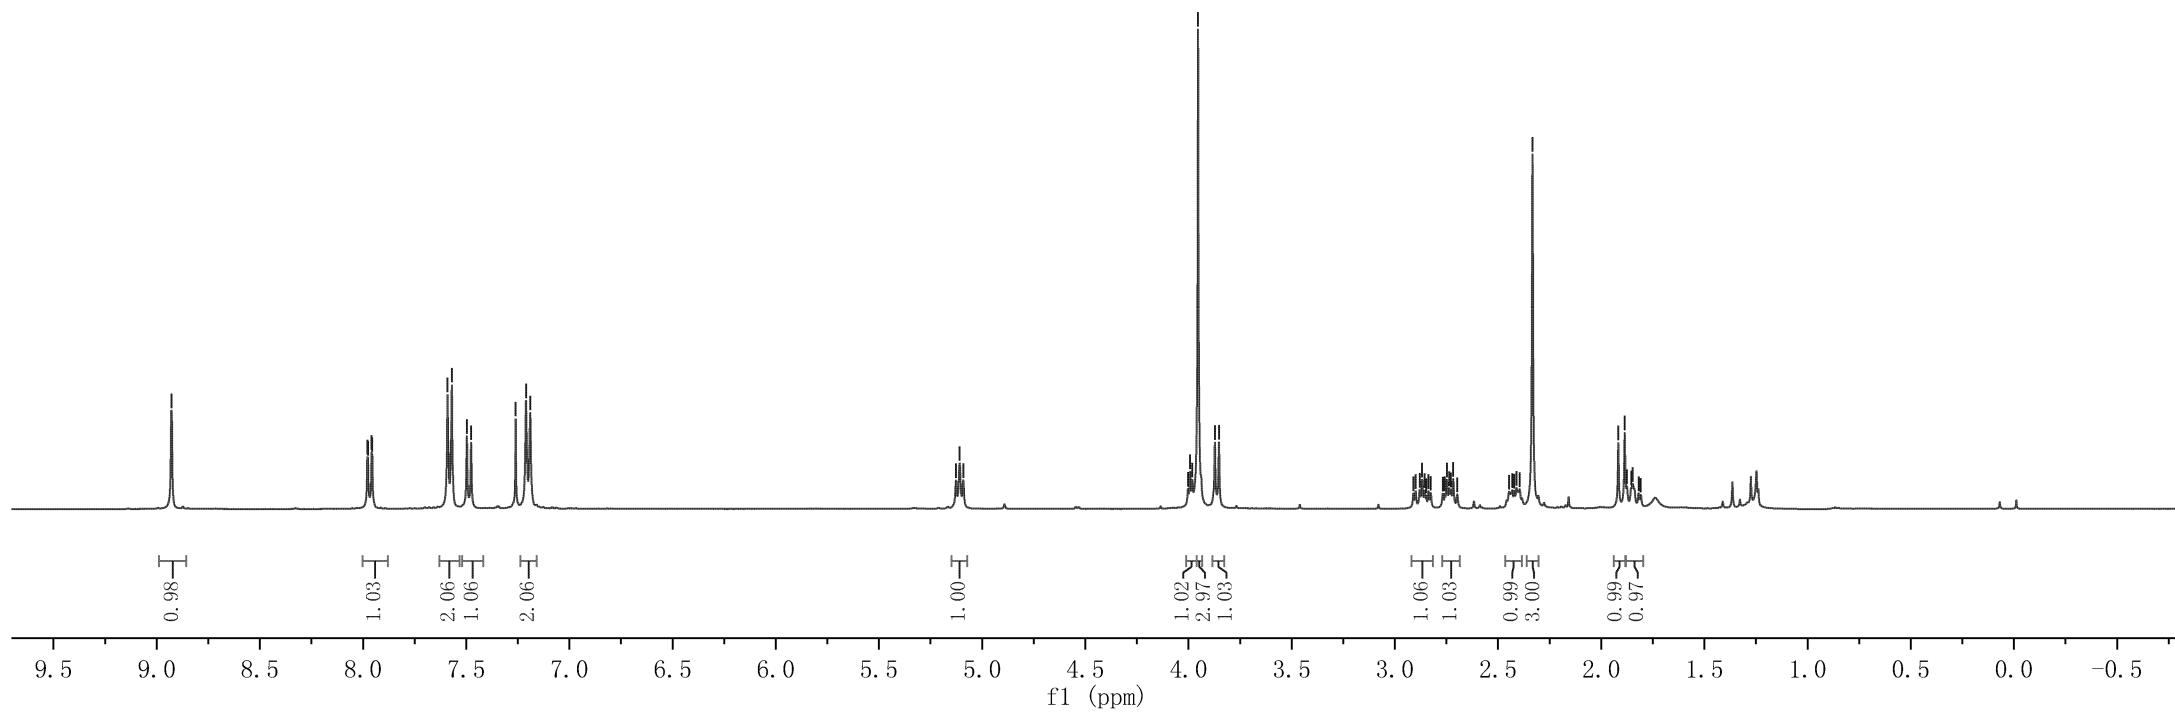

— 175.16  
— 167.16  
— 145.46  
— 140.01  
— 135.64  
— 135.55  
— 131.88  
— 130.06  
— 126.60  
— 126.24  
— 124.97  
— 121.03  
— 117.42  
— 117.00

78.31  
77.32  
77.00  
76.68

— 52.17

36.79  
35.88  
31.50

21.50  
20.00

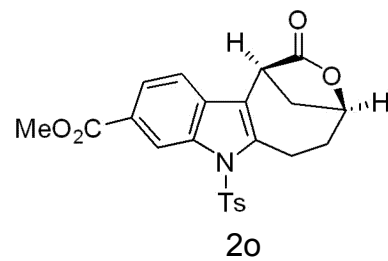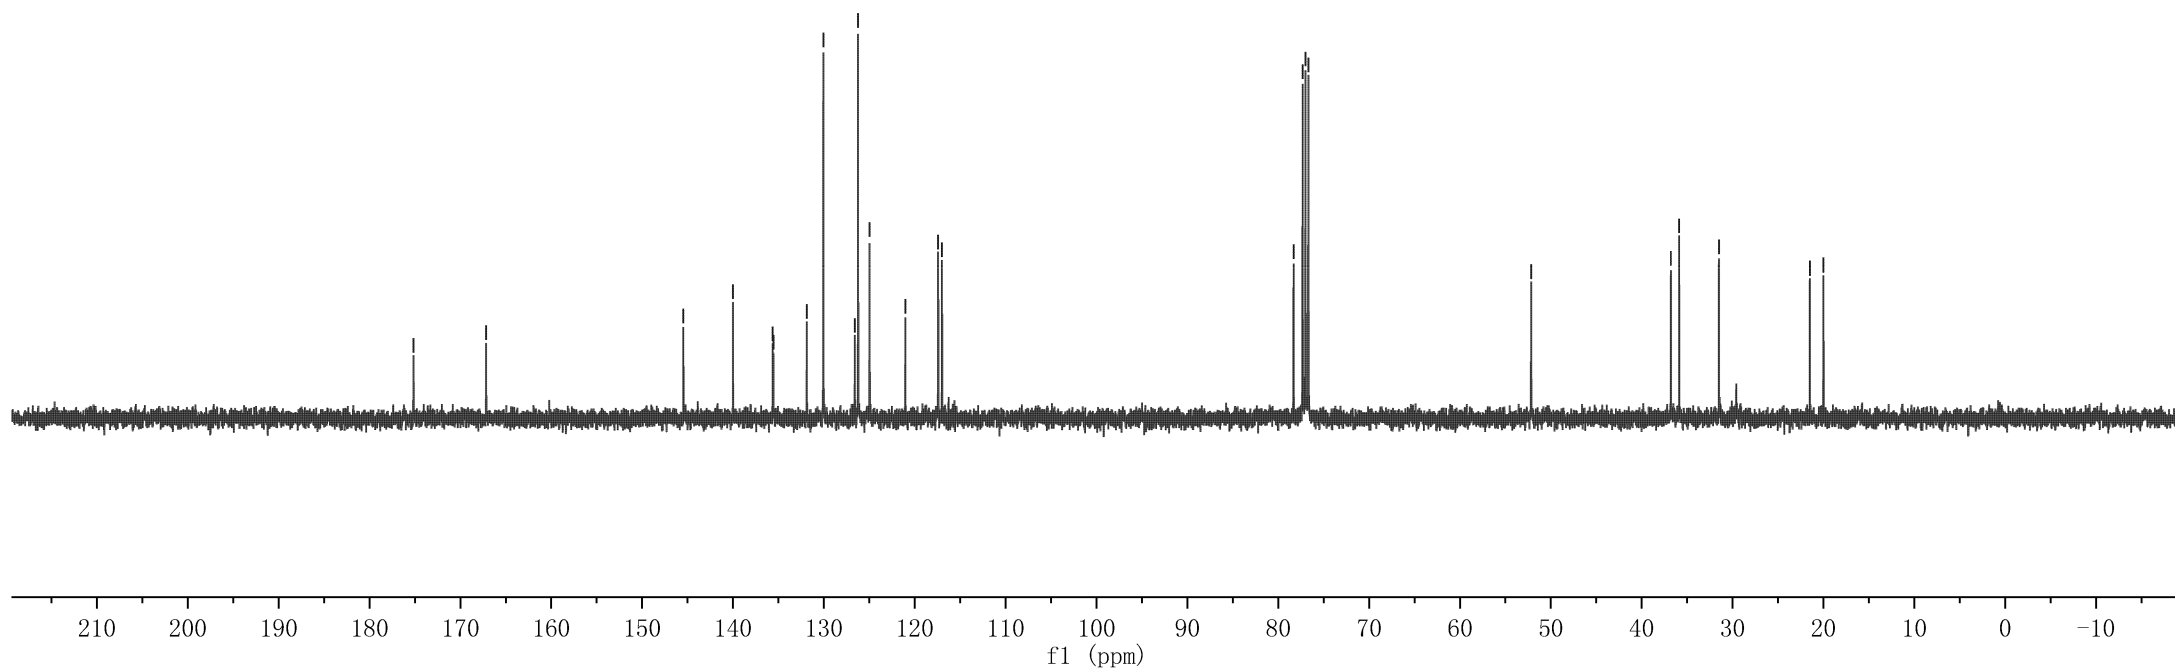

7.260  
7.222  
7.204  
7.185  
7.158  
7.141  
7.137  
7.121  
7.102  
7.077  
7.057

5.064  
5.046  
5.028

3.608  
3.592  
3.588  
3.583  
3.560  
3.549  
3.539  
2.904  
2.885  
2.873  
2.861  
2.842  
2.704  
2.631  
2.620  
2.611  
2.601  
2.340  
2.321  
1.741  
1.729  
1.710  
1.704  
1.701  
1.695  
1.674  
1.661  
1.631

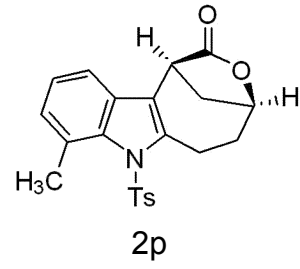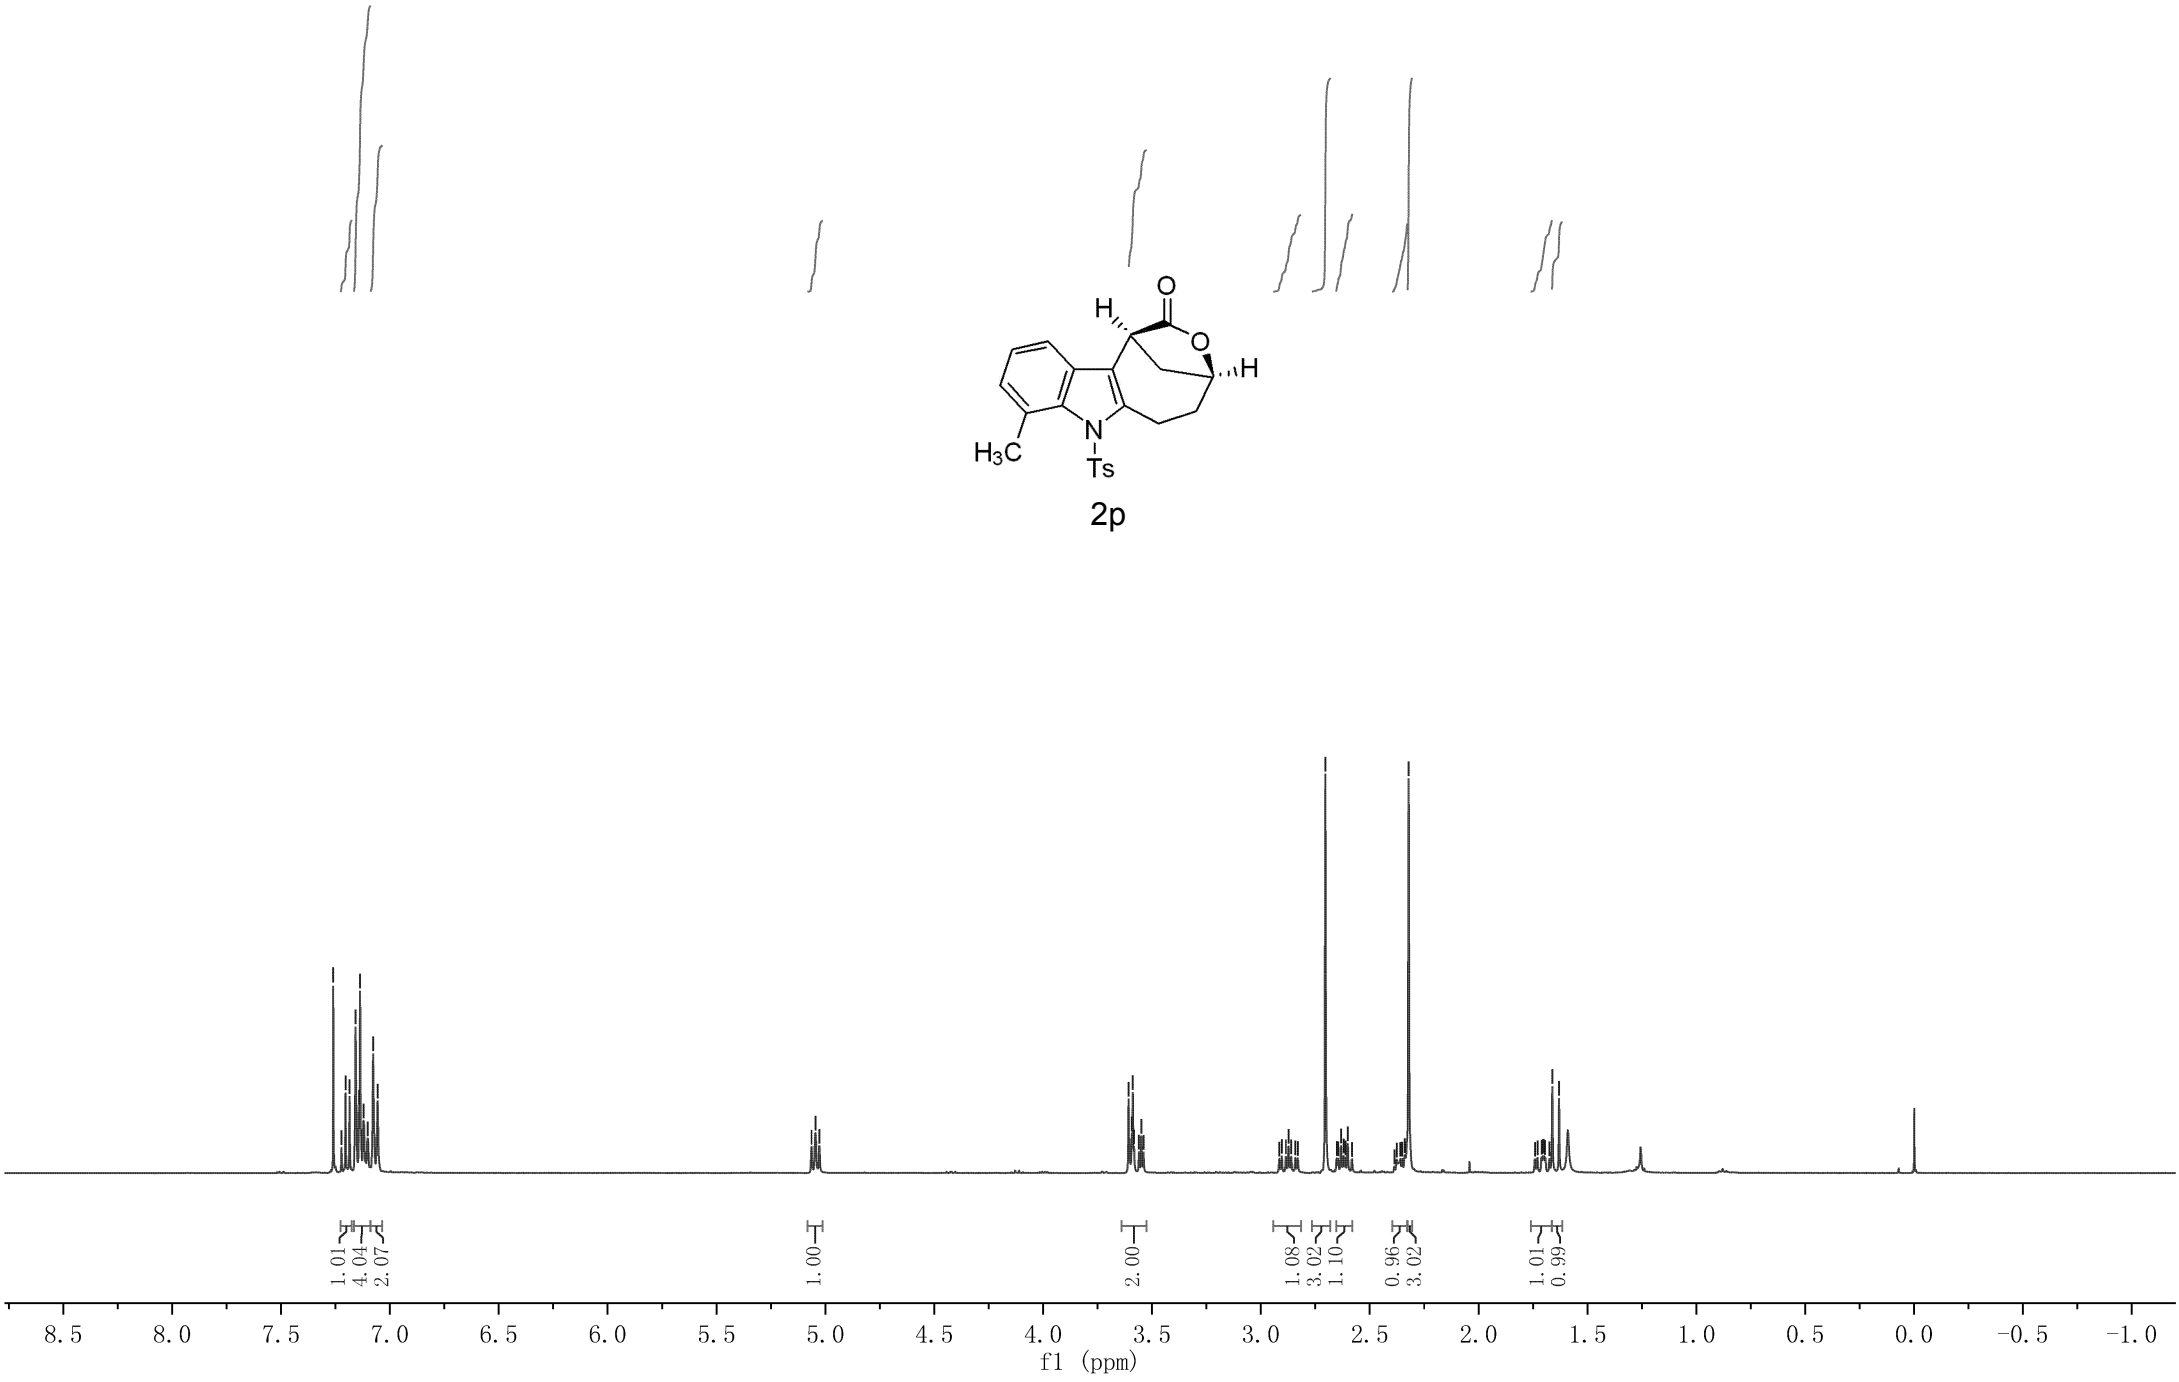

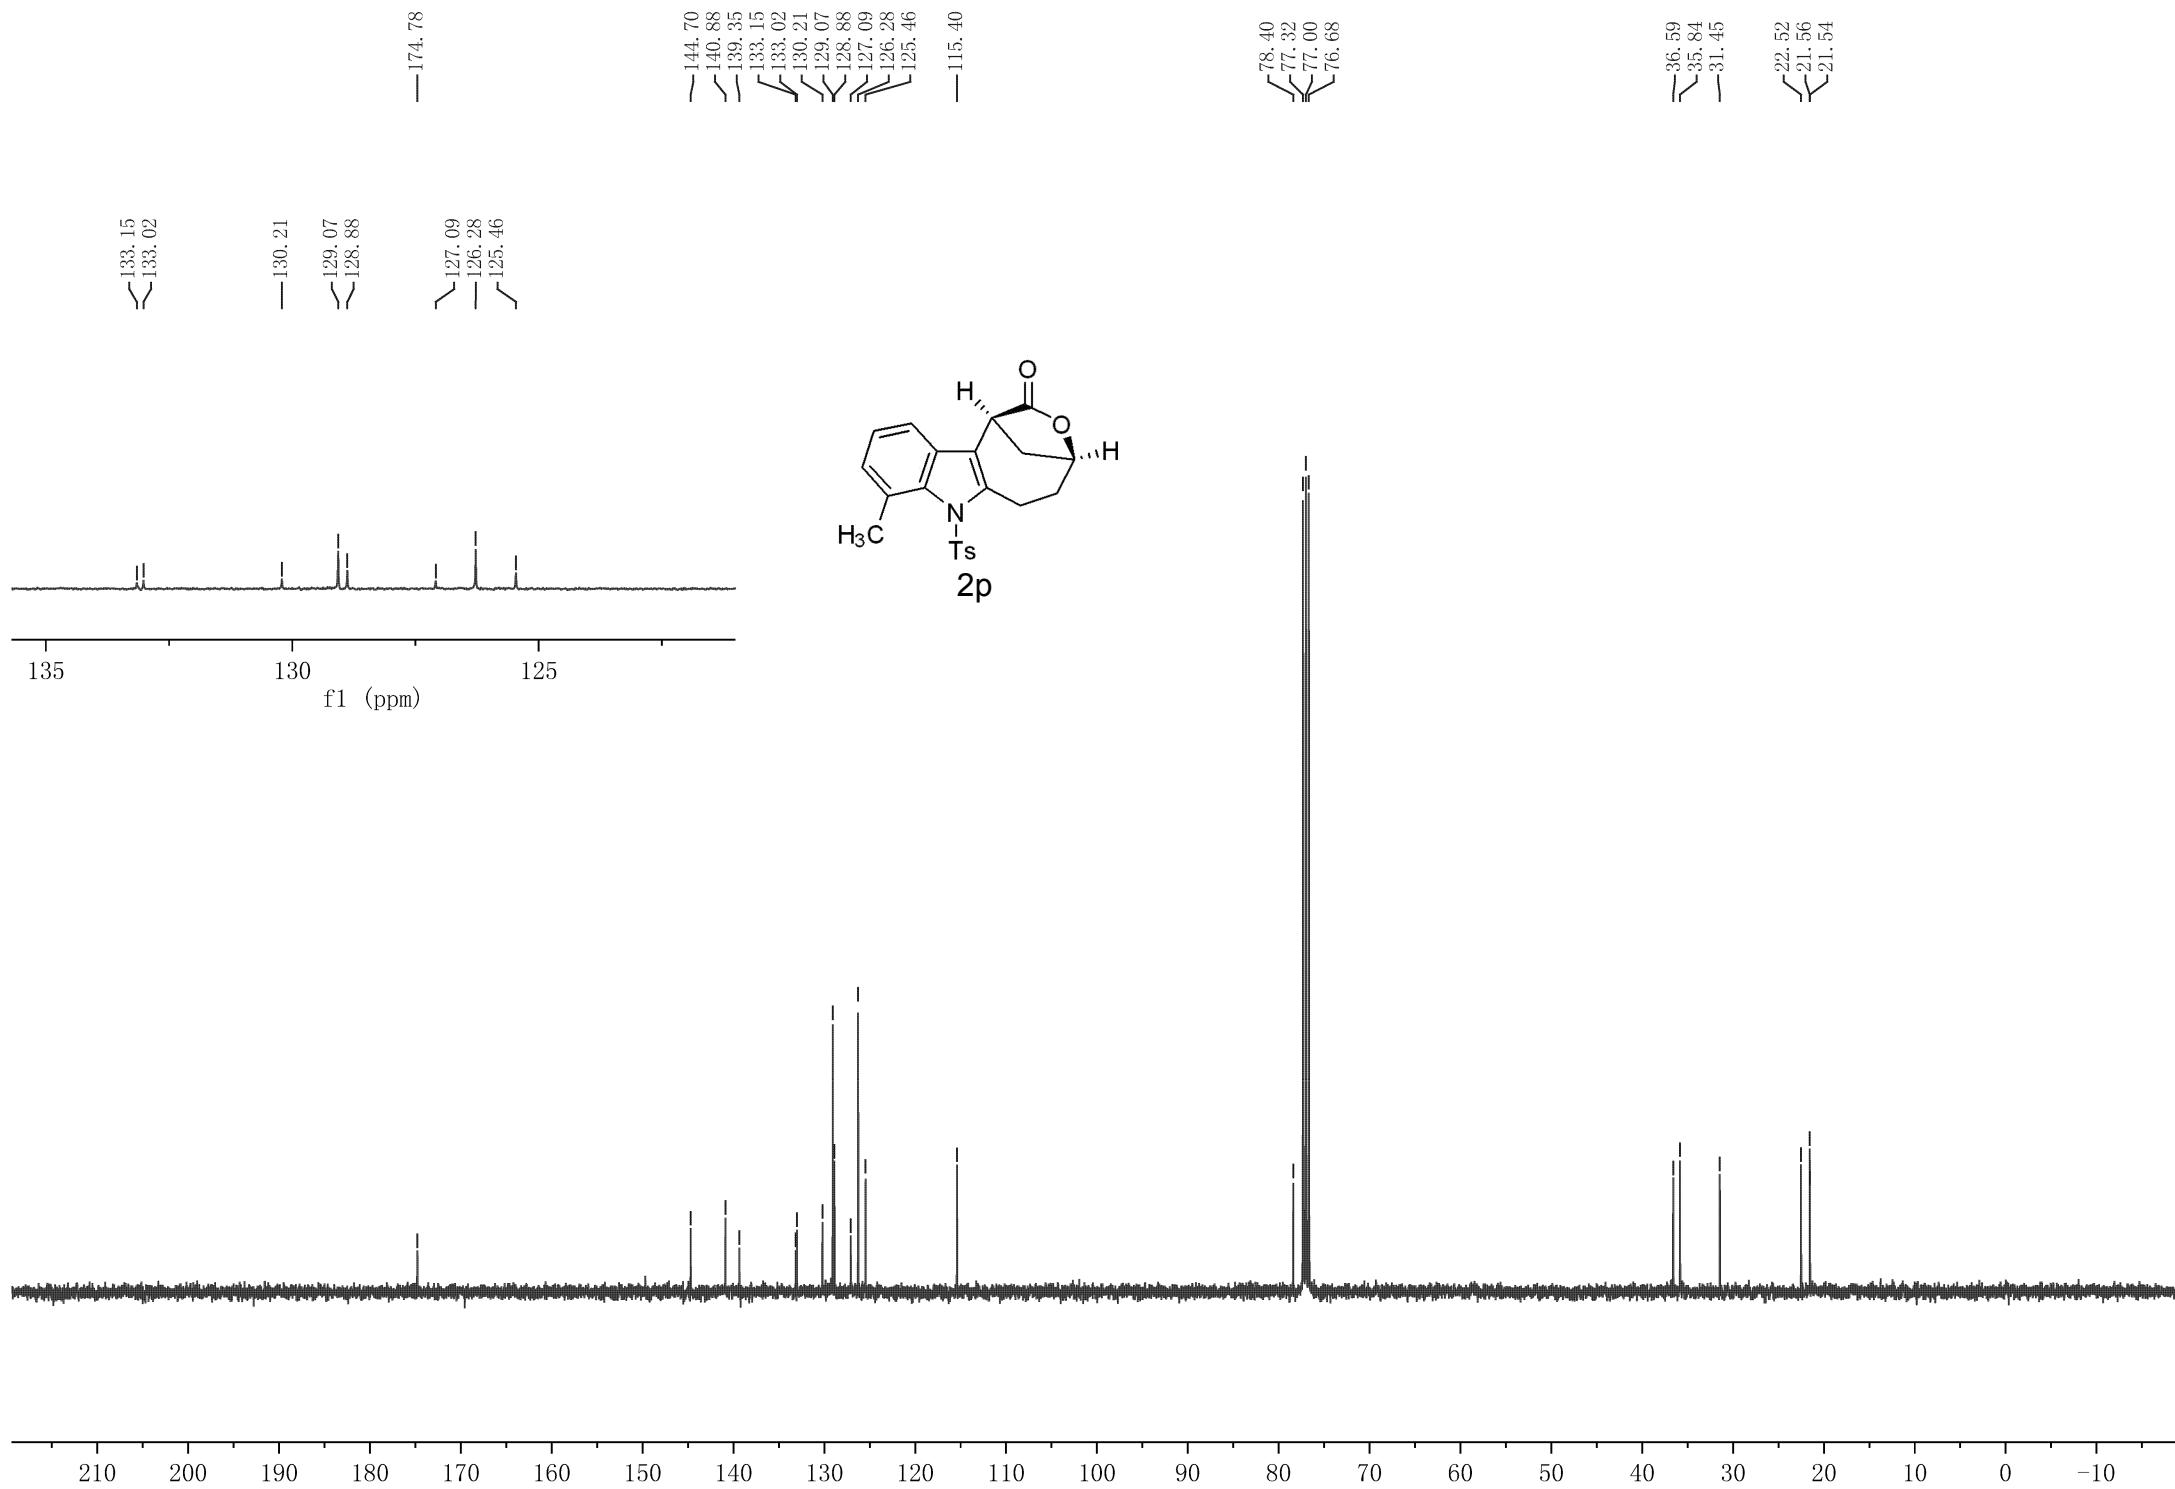

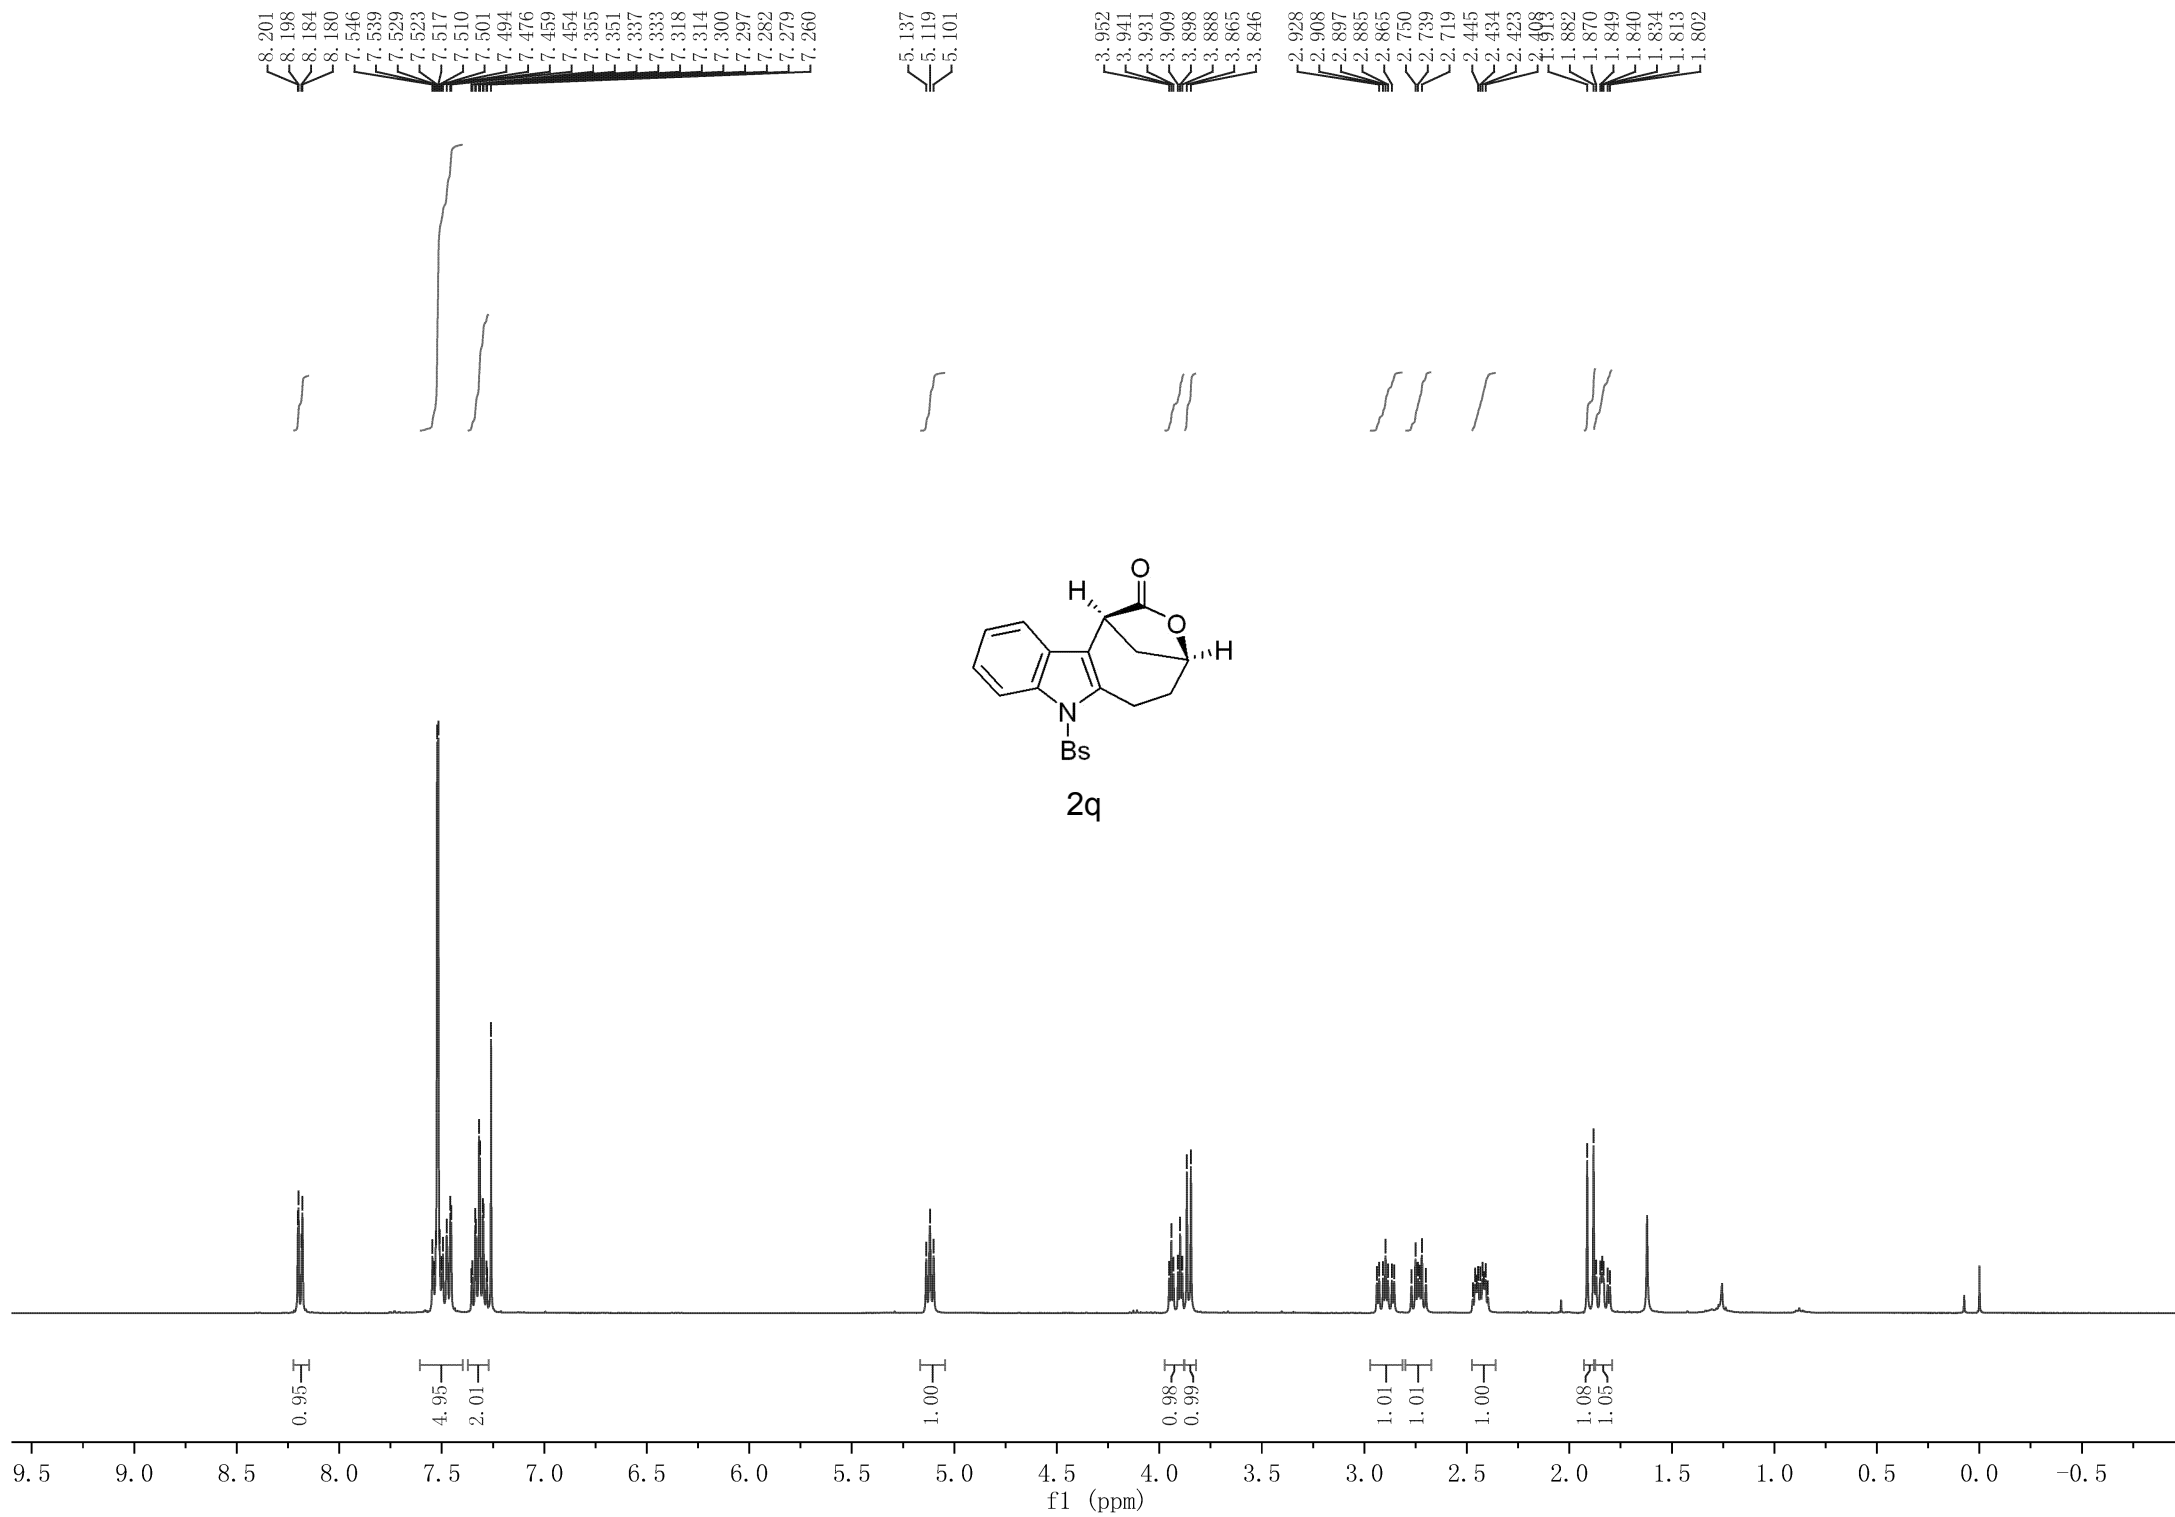

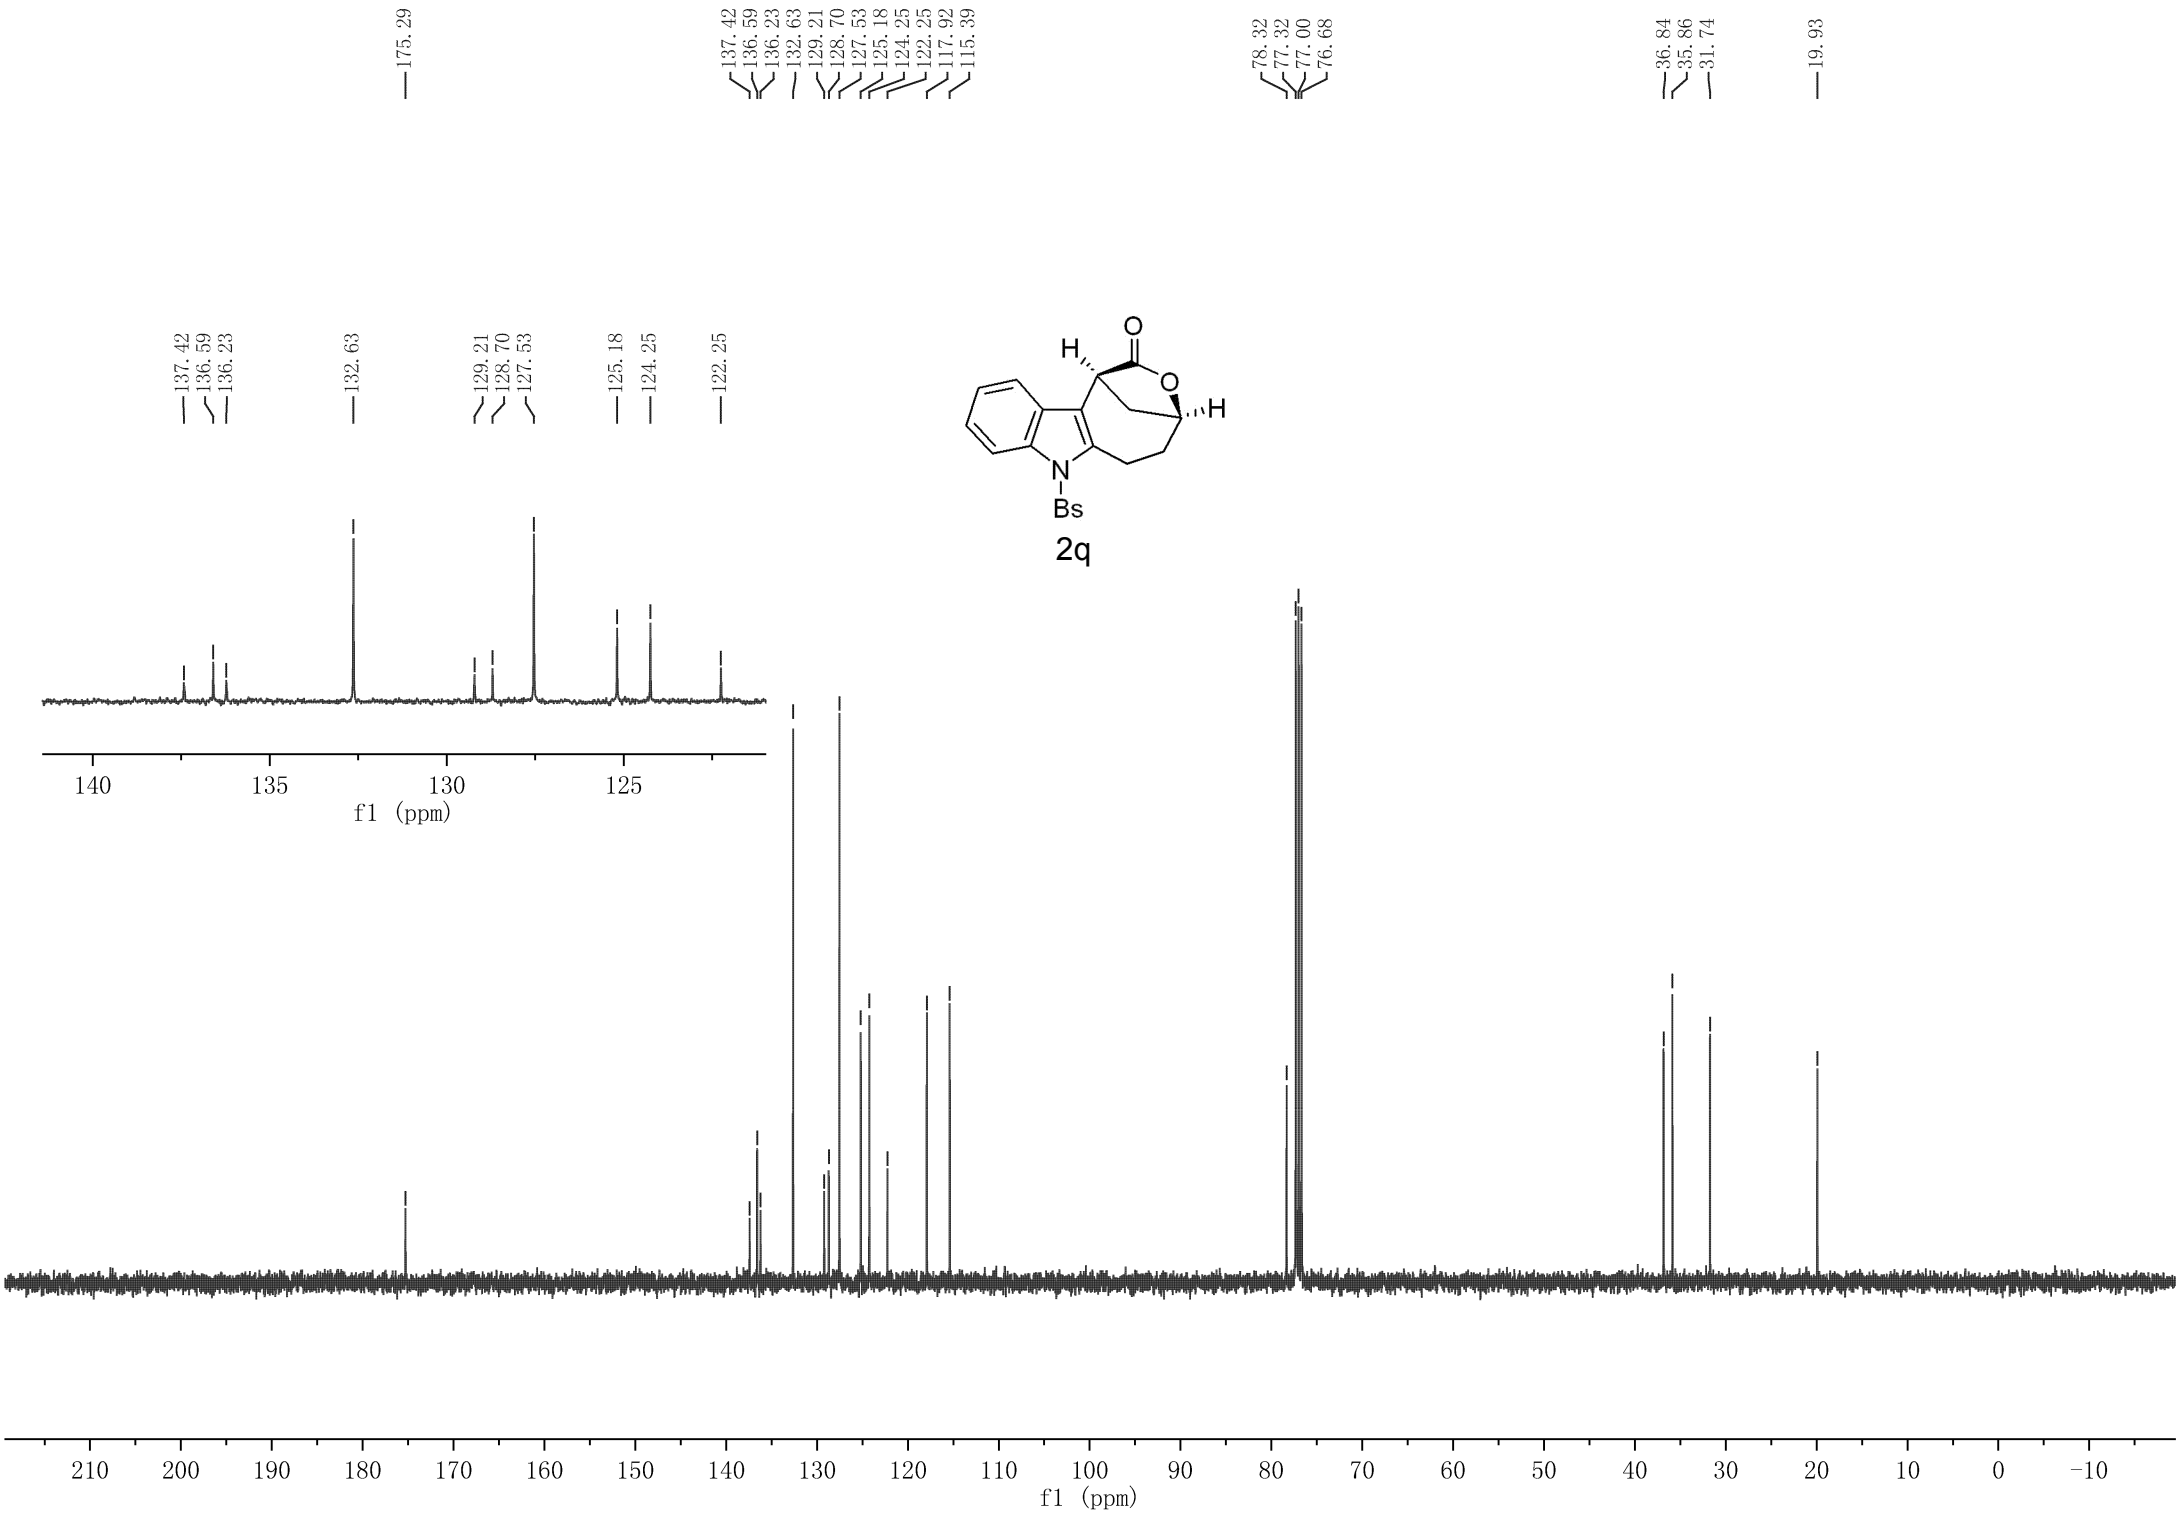



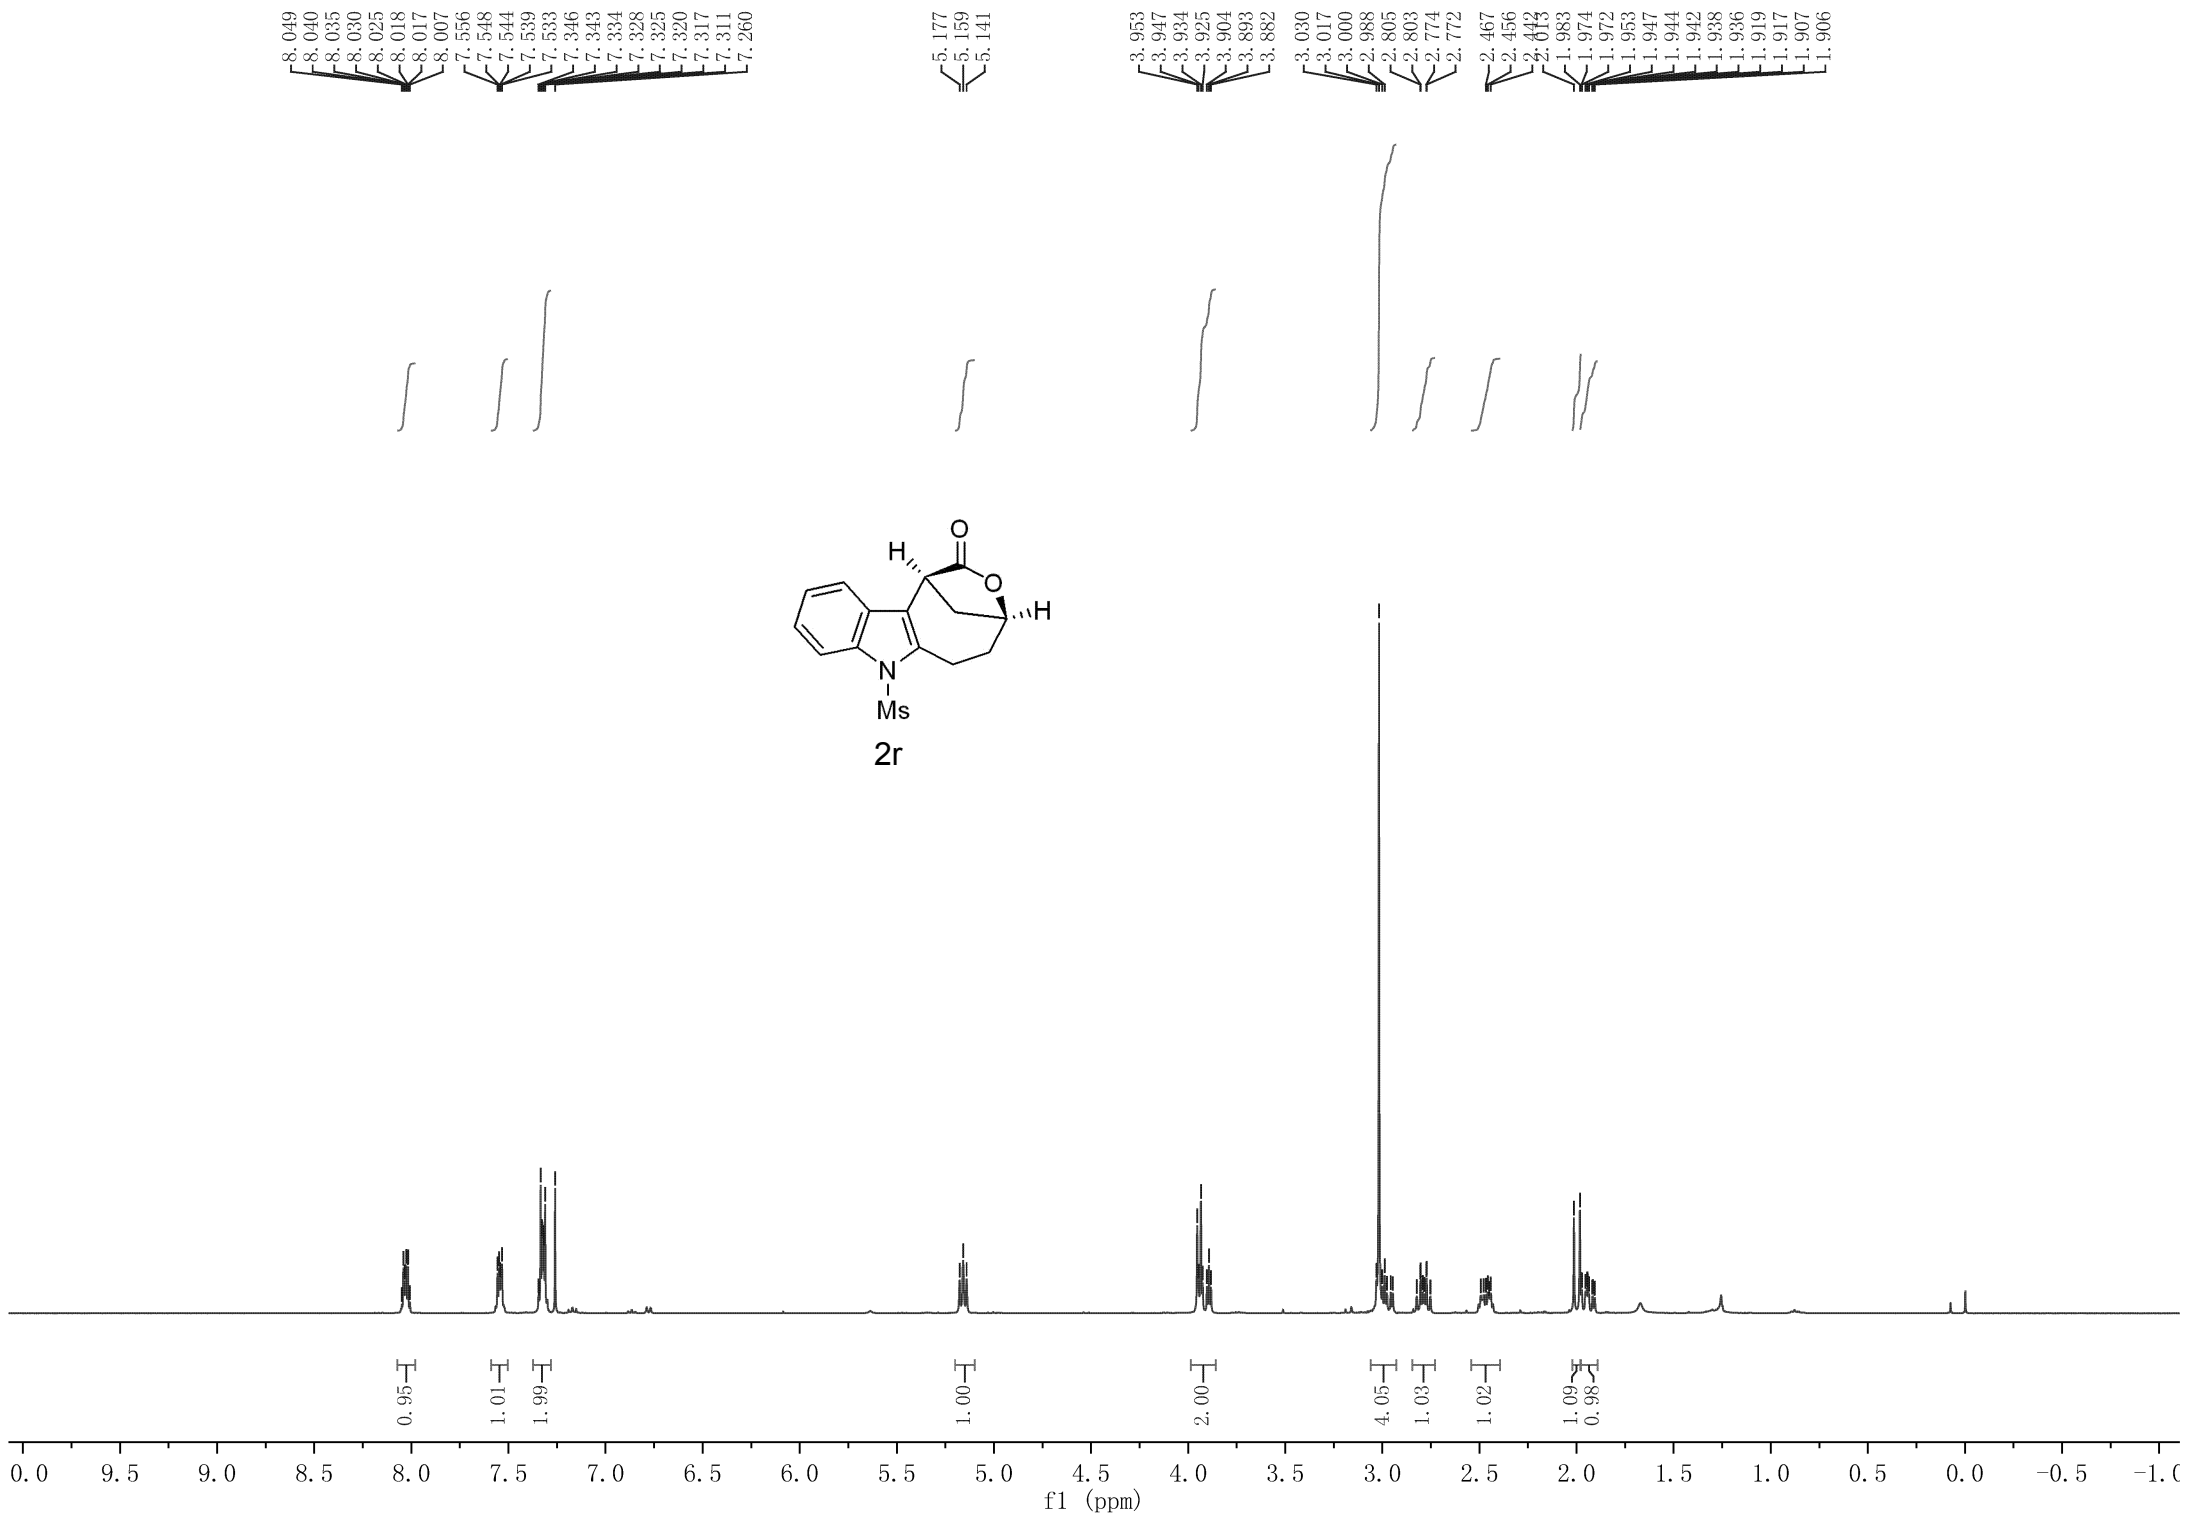

— 175.64

136.60  
135.80

128.42  
125.02  
123.98  
121.11  
117.89  
114.74

78.50  
77.32  
77.00  
76.68

41.24  
36.81  
35.92  
31.69

— 19.50

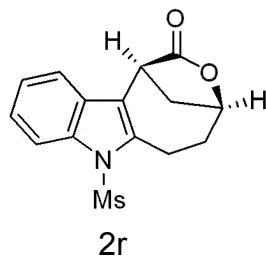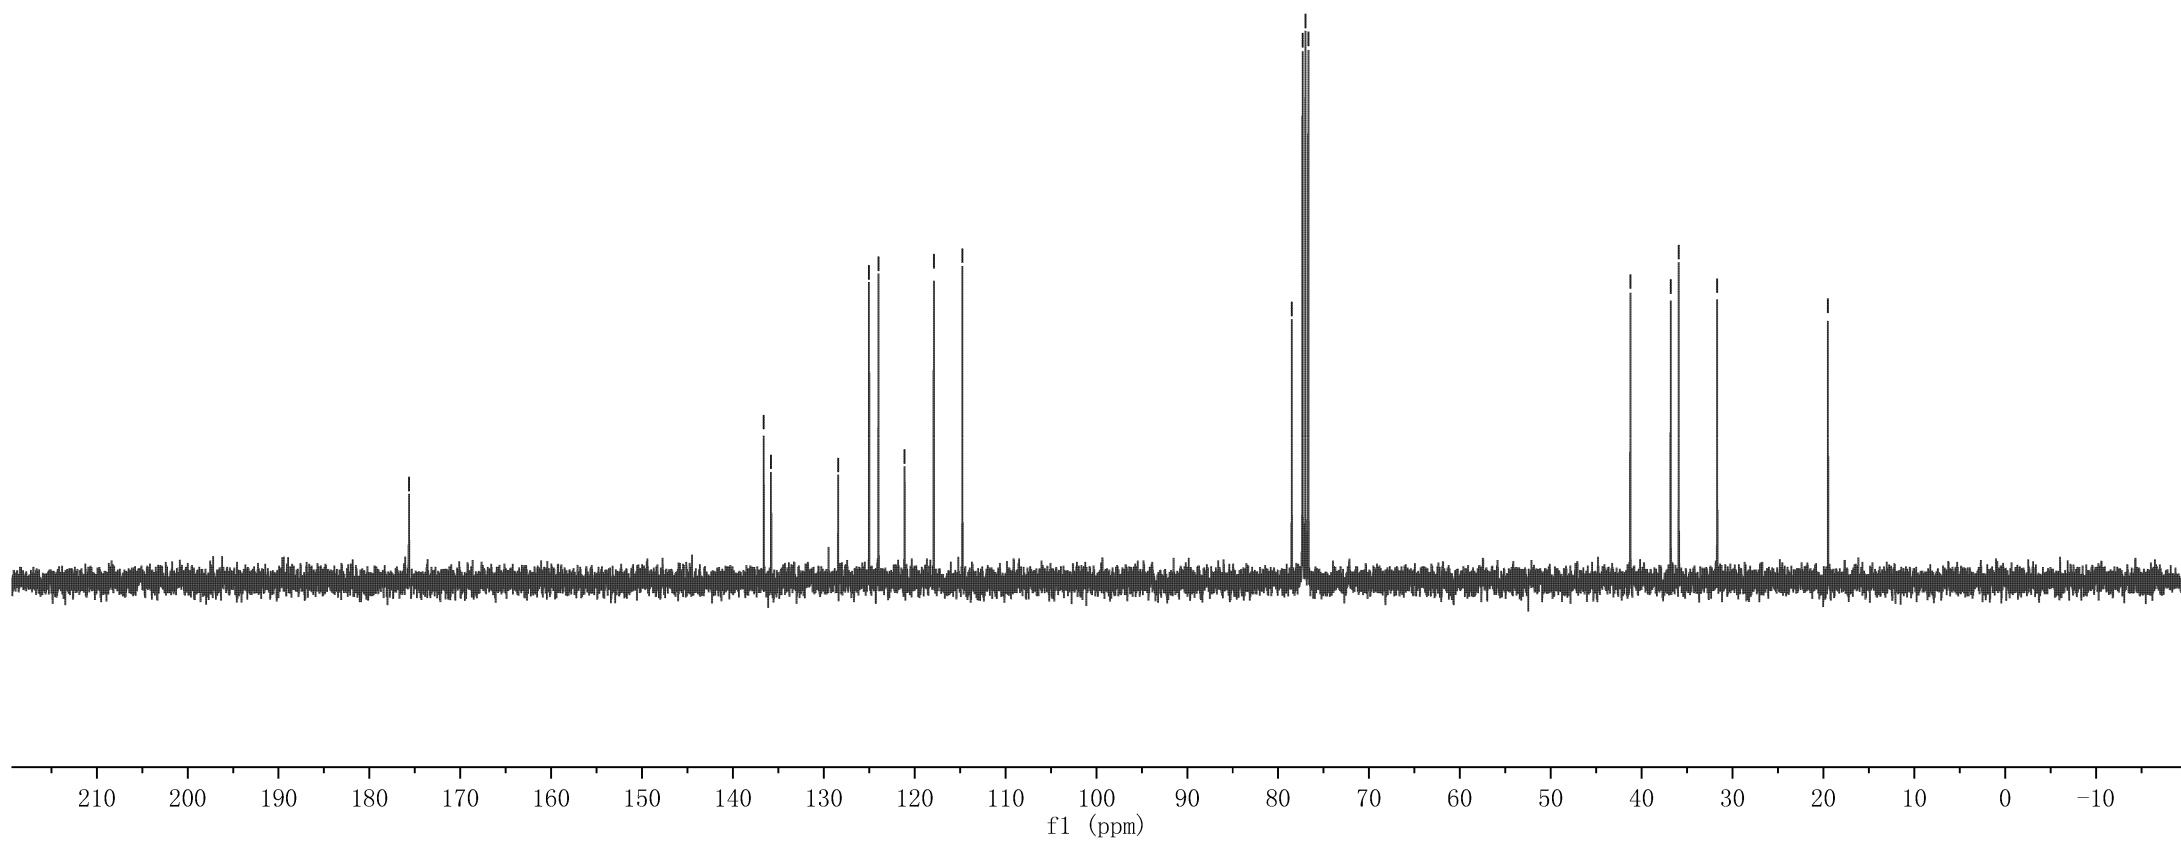

8.243  
8.227  
7.546  
7.529  
7.447  
7.432  
7.337  
7.335  
7.321  
7.306  
7.304  
7.294  
7.292  
7.279  
7.260  
7.188  
7.172

4.806  
4.790

3.934  
3.926  
3.900  
3.892  
3.821  
3.806

2.760  
2.744  
2.735  
2.728  
2.719  
2.703  
2.640  
2.617  
2.606  
2.583

2.335  
2.041  
2.032  
2.026  
2.018  
2.009  
2.004  
1.888  
1.863  
1.852  
1.238

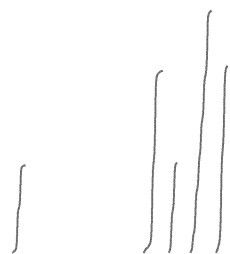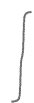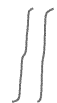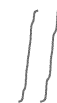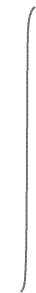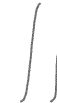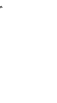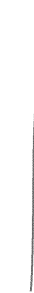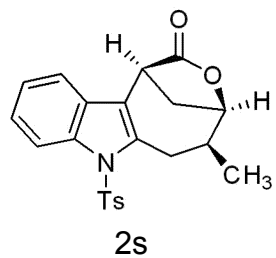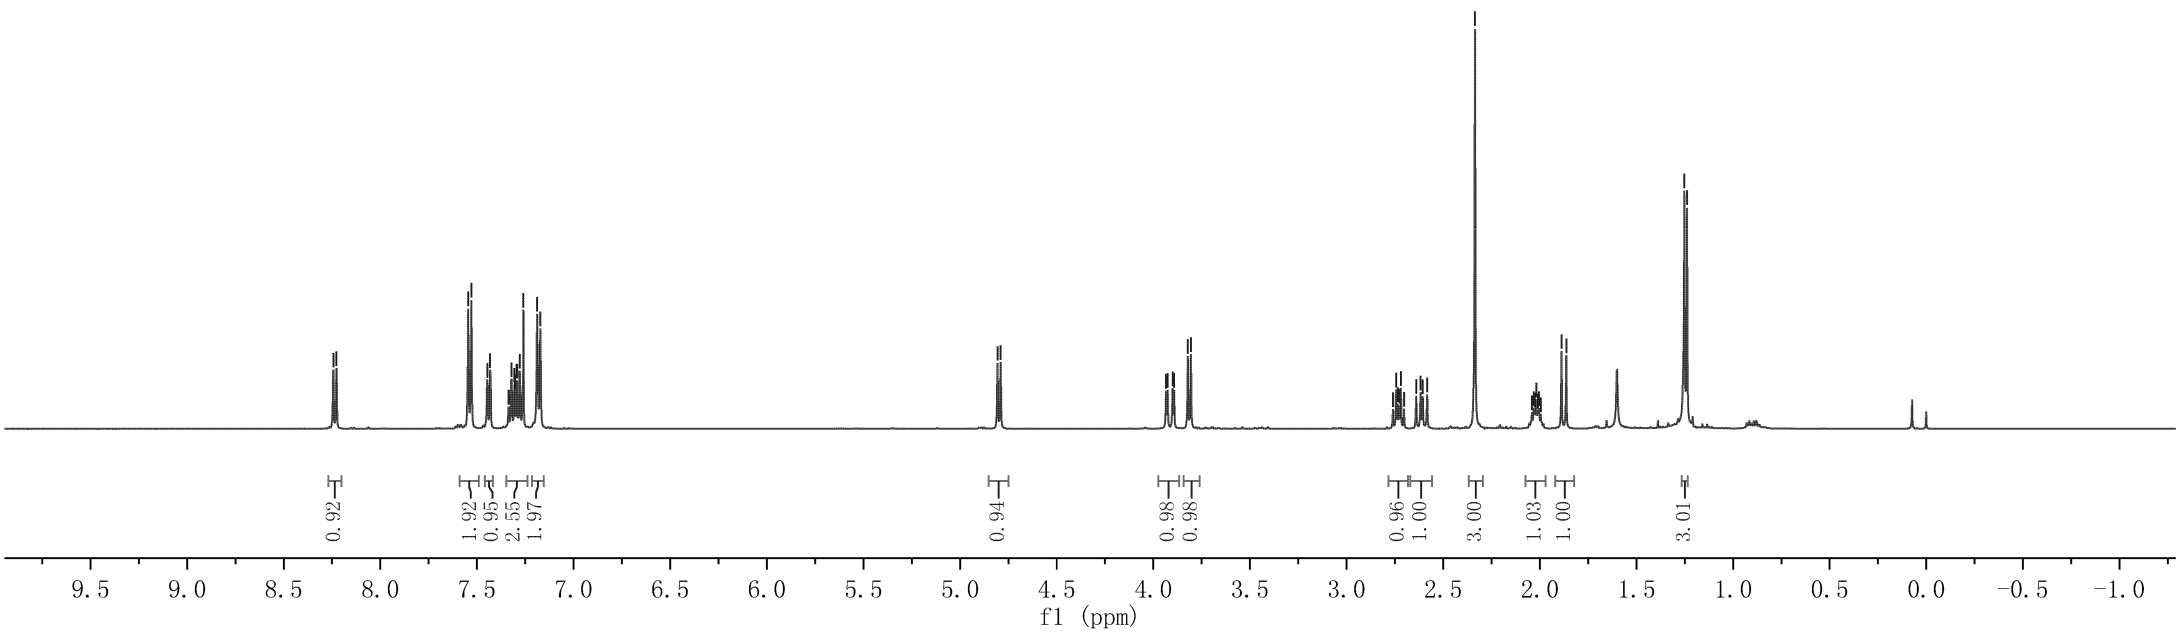

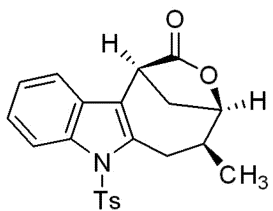

2s

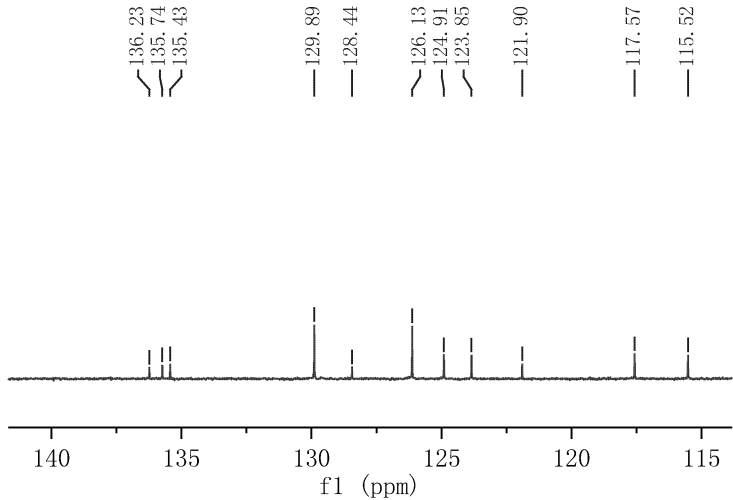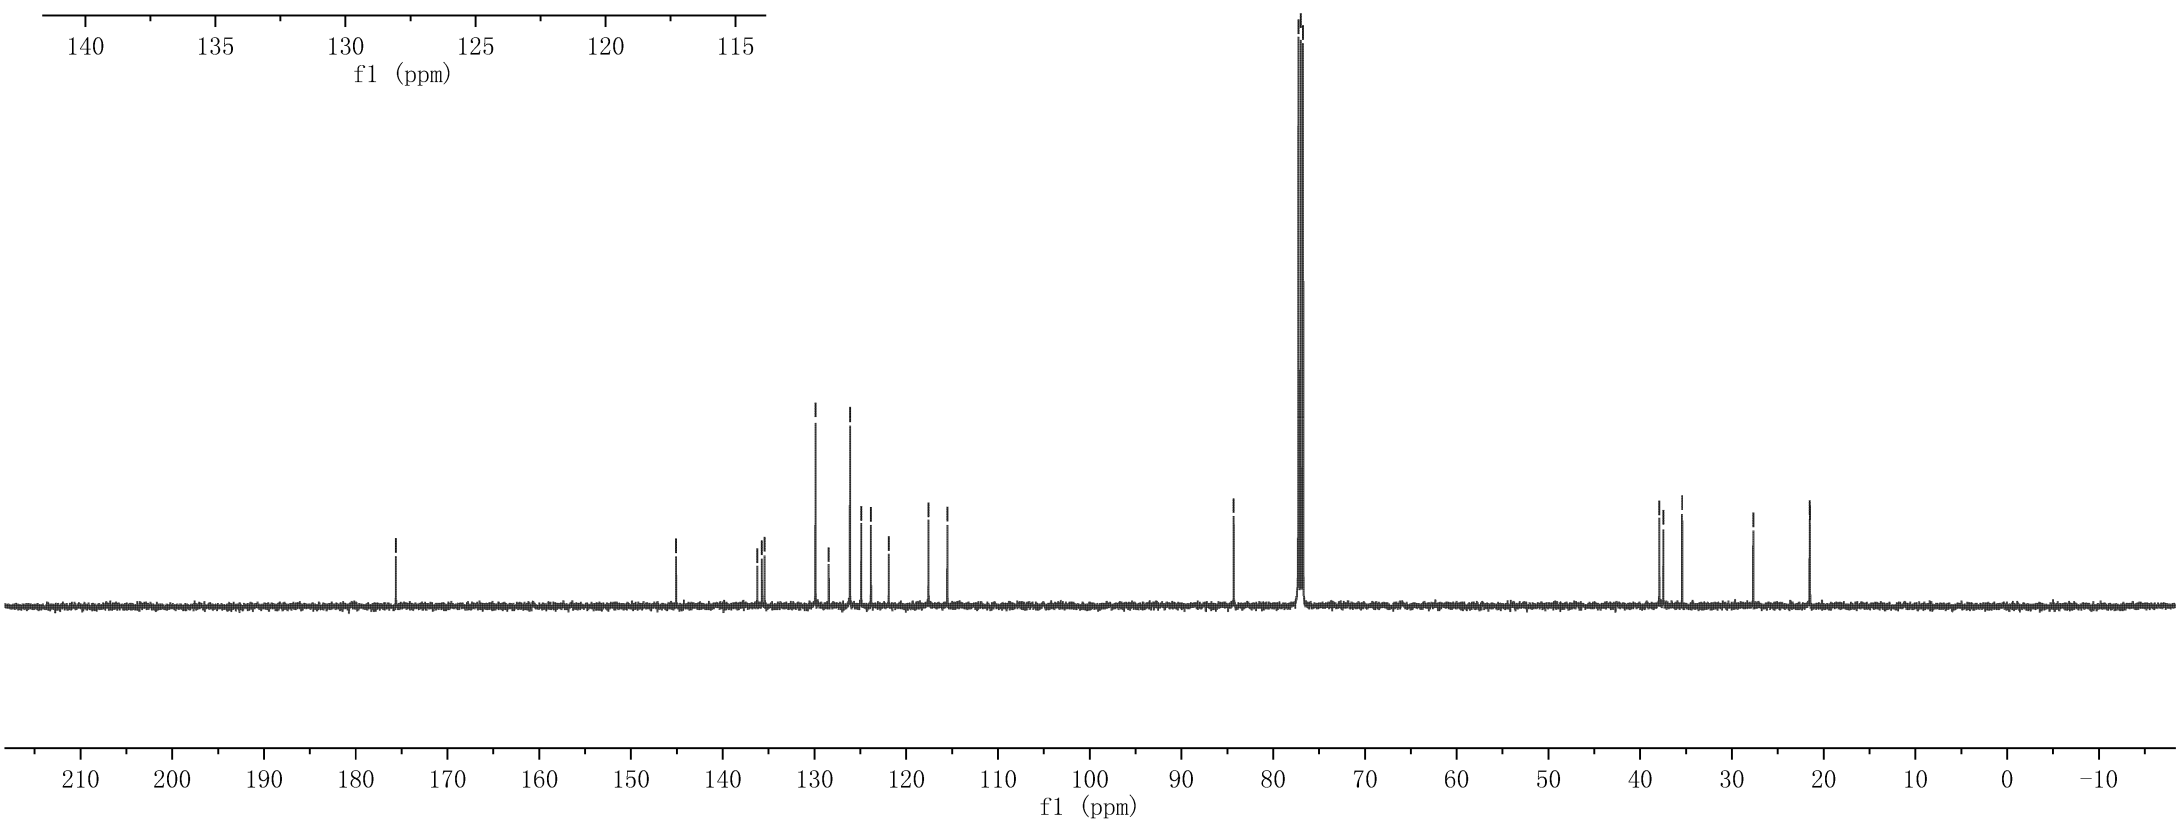

8.283  
8.263  
7.594  
7.575  
7.492  
7.474  
7.400  
7.377  
7.350  
7.325  
7.303  
7.260  
7.210  
7.191

4.113  
4.075  
4.061

2.989  
2.956  
2.916  
2.742  
2.716  
2.692  
2.430  
2.394  
2.349  
2.323  
2.210  
2.178  
2.143

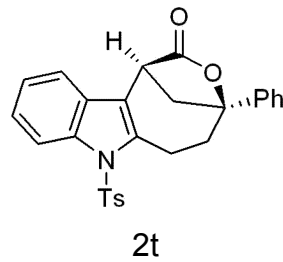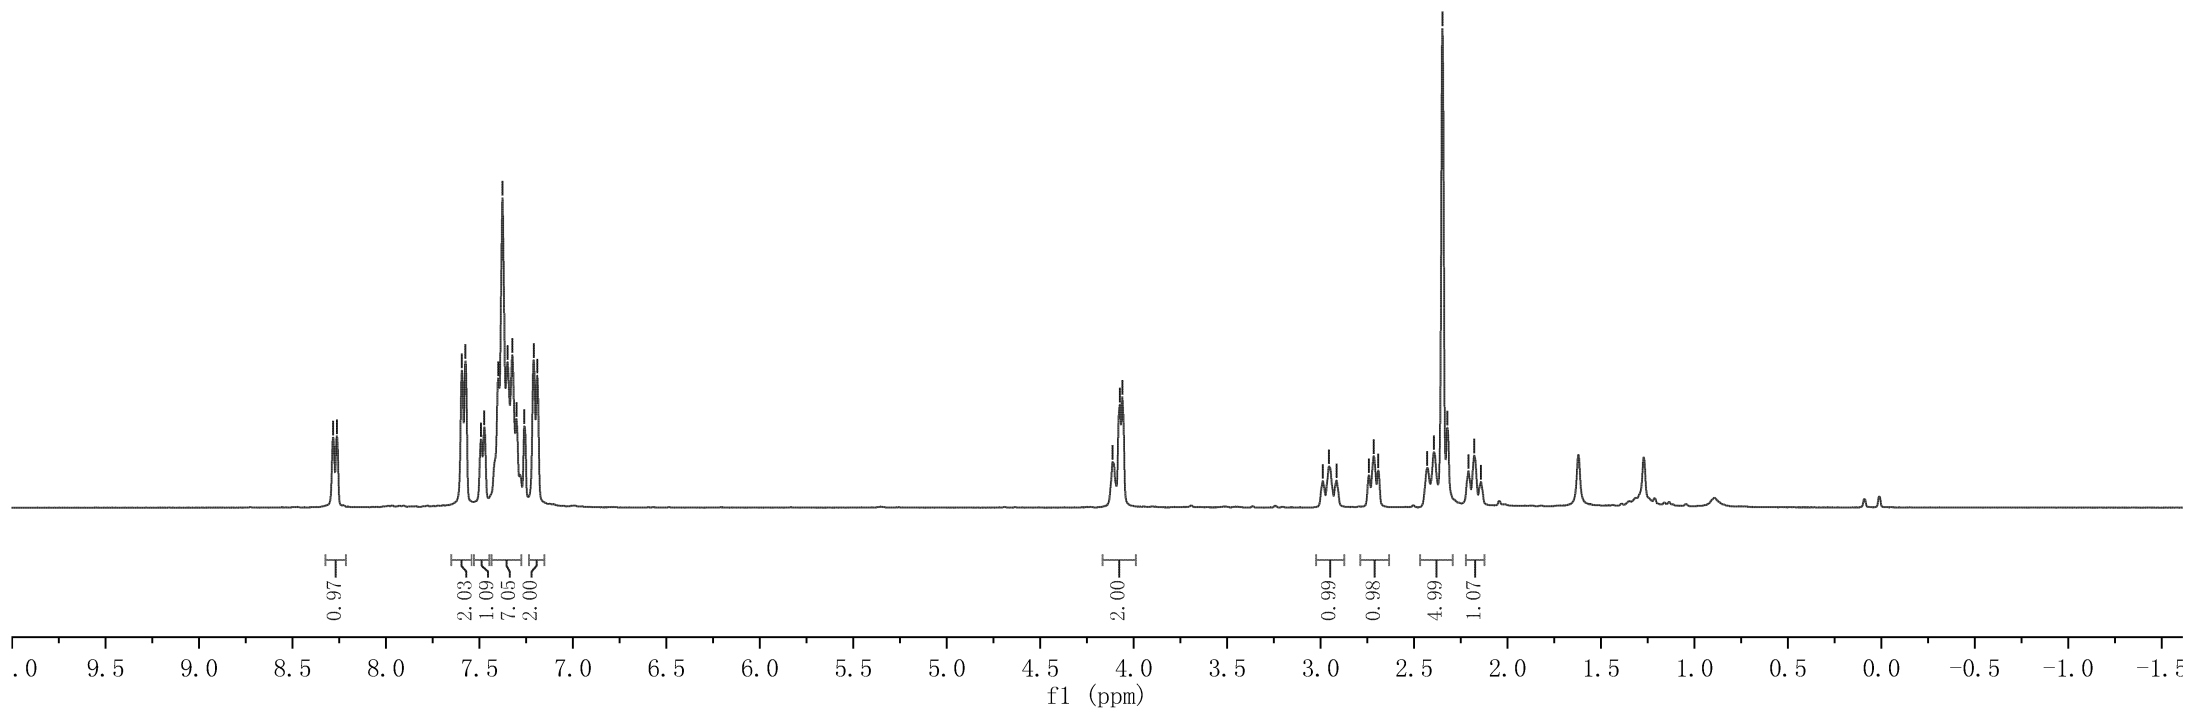

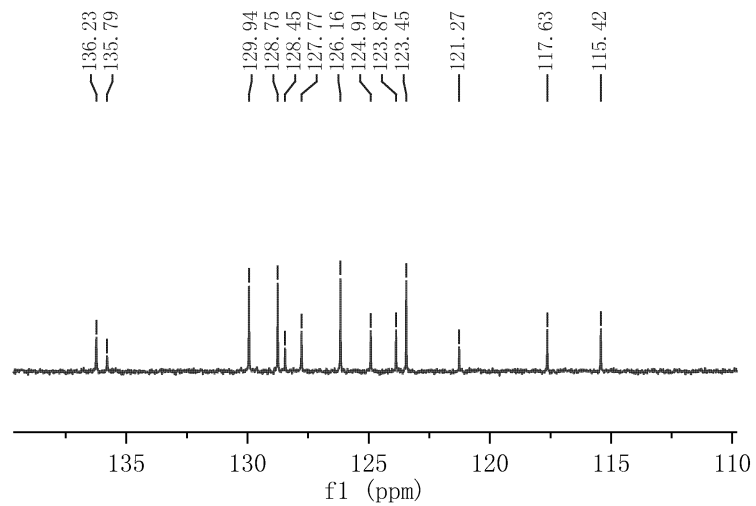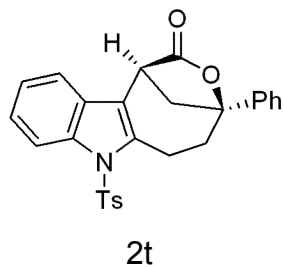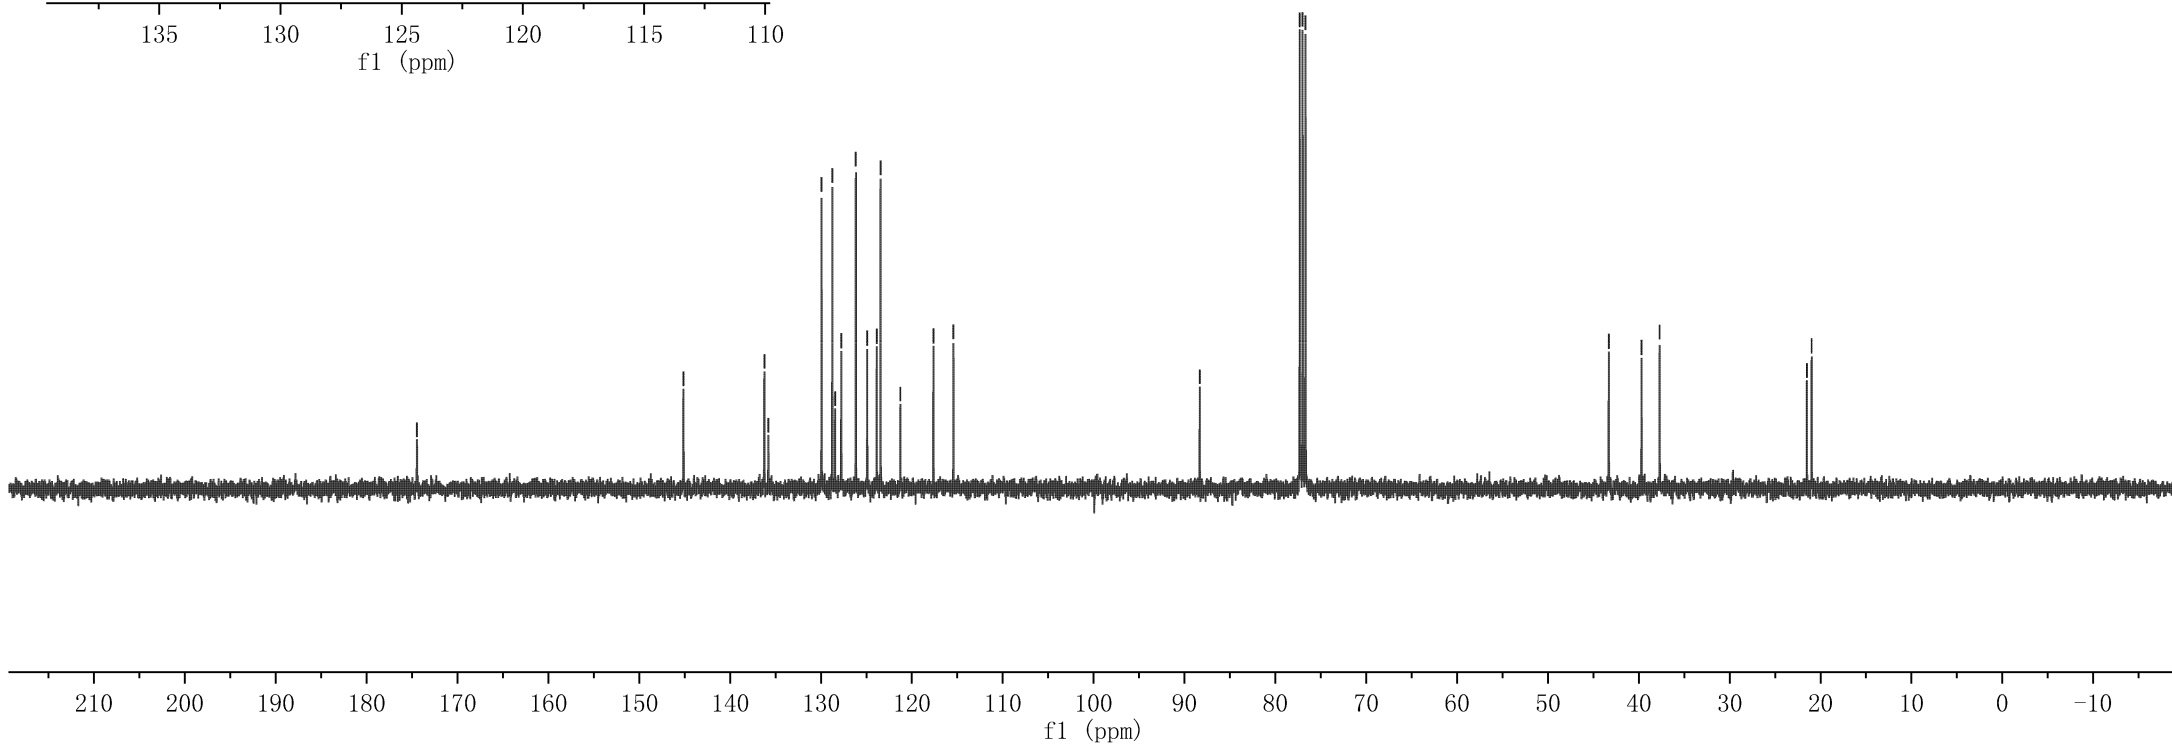

130.00  
128.81  
127.83  
126.23  
124.98  
123.93  
123.51  
117.69  
115.49

43.37  
39.77  
37.78

21.58  
21.05

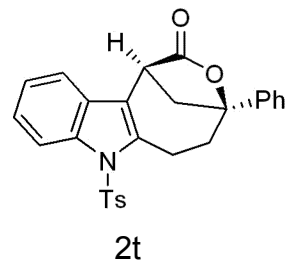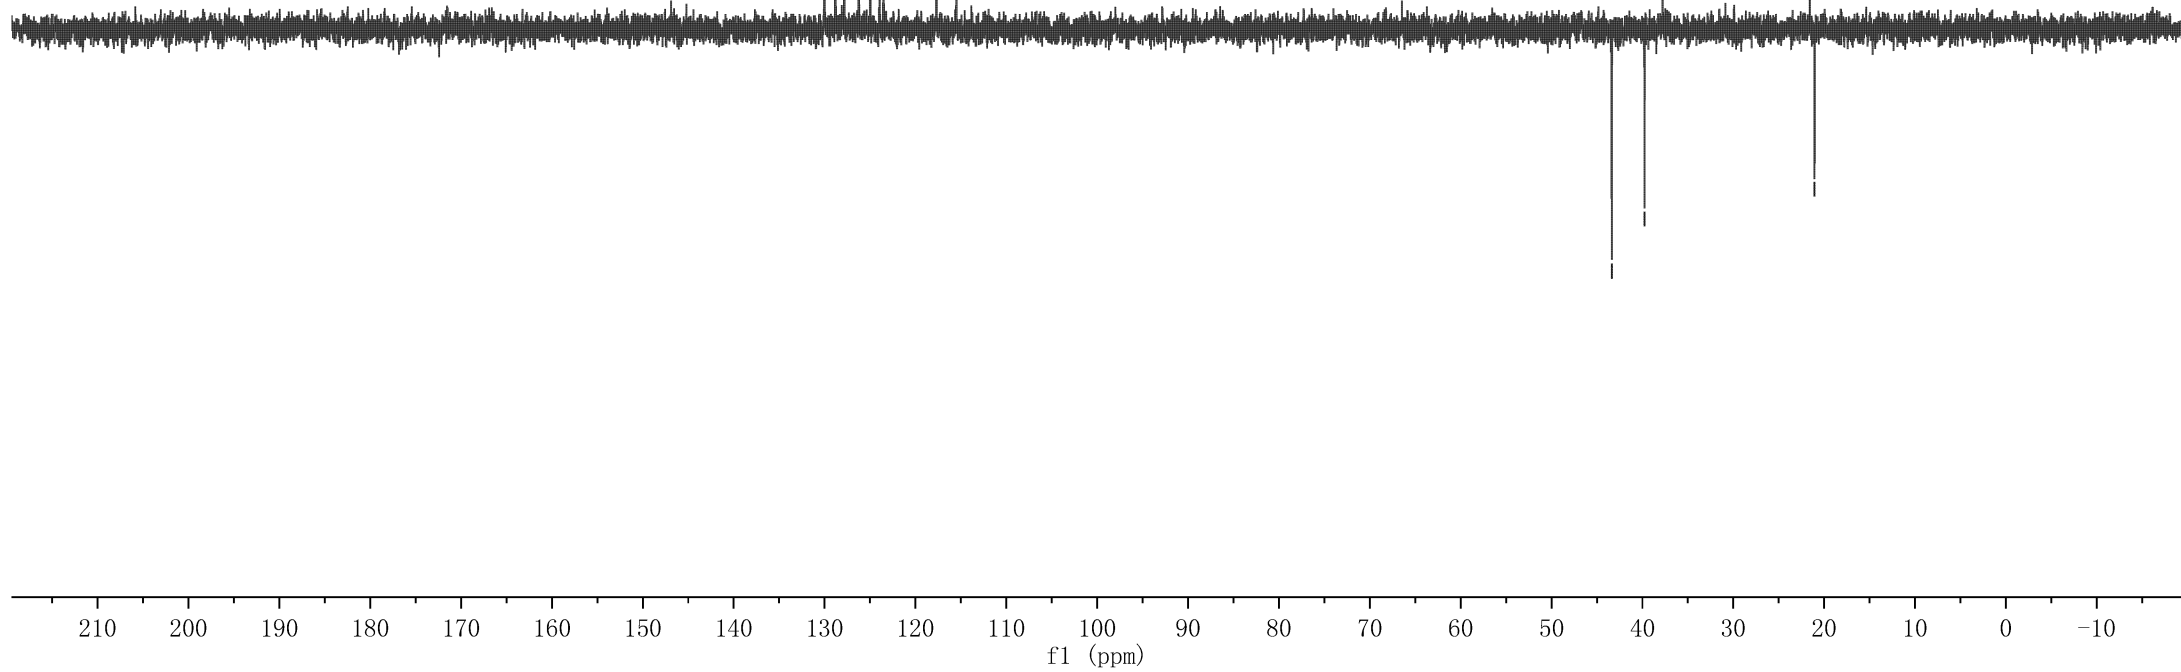

8.089  
7.580  
7.563  
7.411  
7.395  
7.381  
7.369  
7.366  
7.361  
7.352  
7.345  
7.339  
7.336  
7.322  
7.311  
7.308  
7.305  
7.260  
7.215  
7.199  
7.141  
7.125

4.062  
4.054  
4.046  
4.039  
4.028  
4.022  
4.012  
2.946  
2.938  
2.922  
2.913  
2.904  
2.887  
2.879  
2.723  
2.720  
2.706  
2.704  
2.698  
2.696  
2.682  
2.679  
2.512  
2.407  
2.403  
2.400  
2.395  
2.378  
2.373  
2.371  
2.357  
2.334  
2.309  
2.184  
2.176  
2.159  
2.155  
2.151  
2.147  
2.130  
2.122

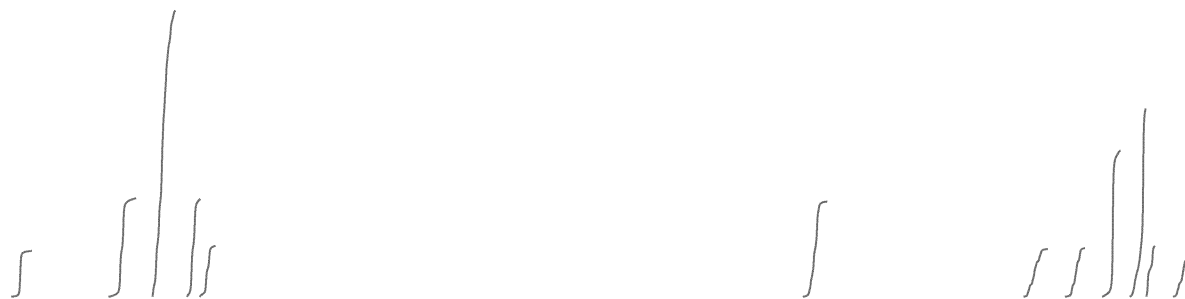

7.411  
7.395  
7.381  
7.369  
7.366  
7.361  
7.352  
7.345  
7.339  
7.336  
7.322  
7.311  
7.308  
7.305  
7.260  
7.215  
7.199  
7.141  
7.125

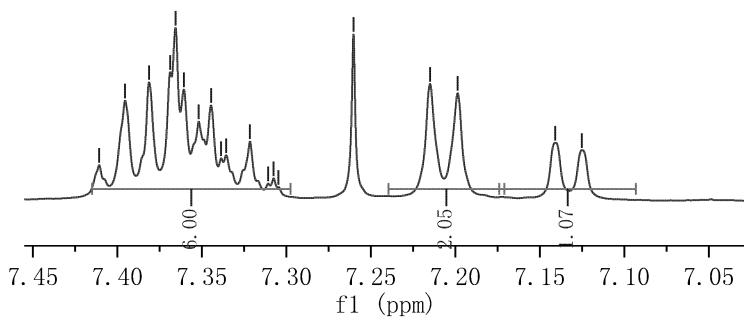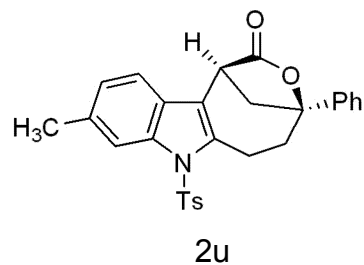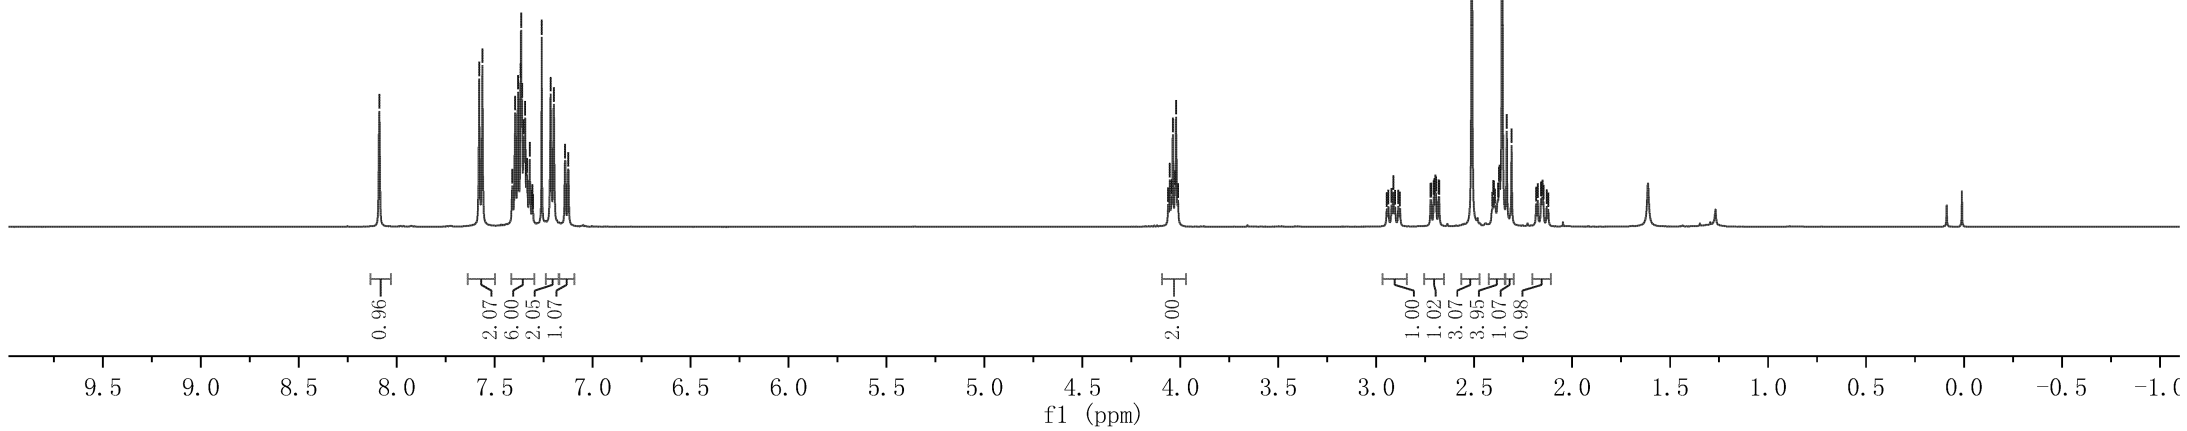



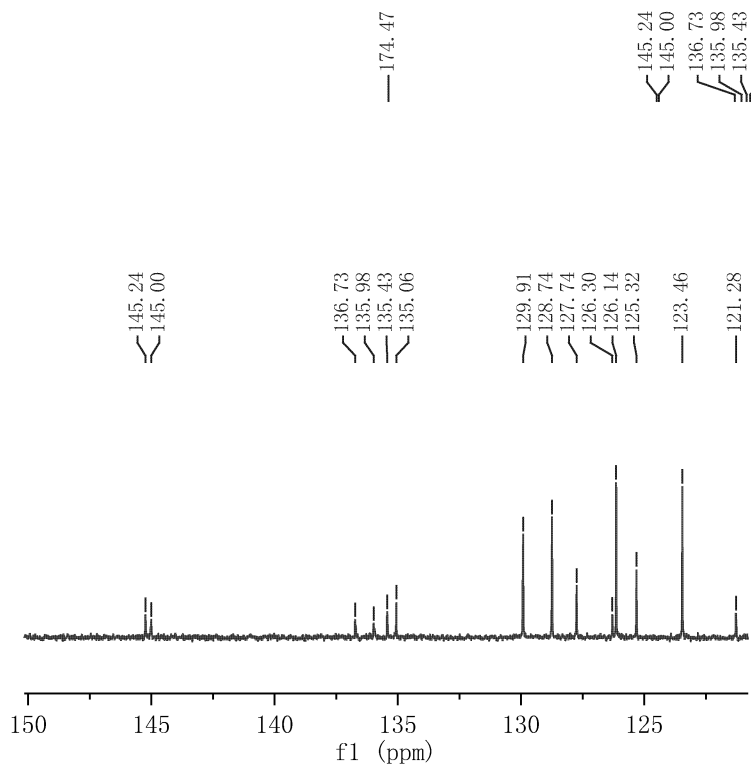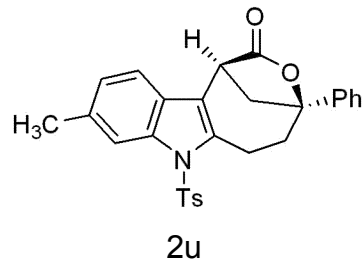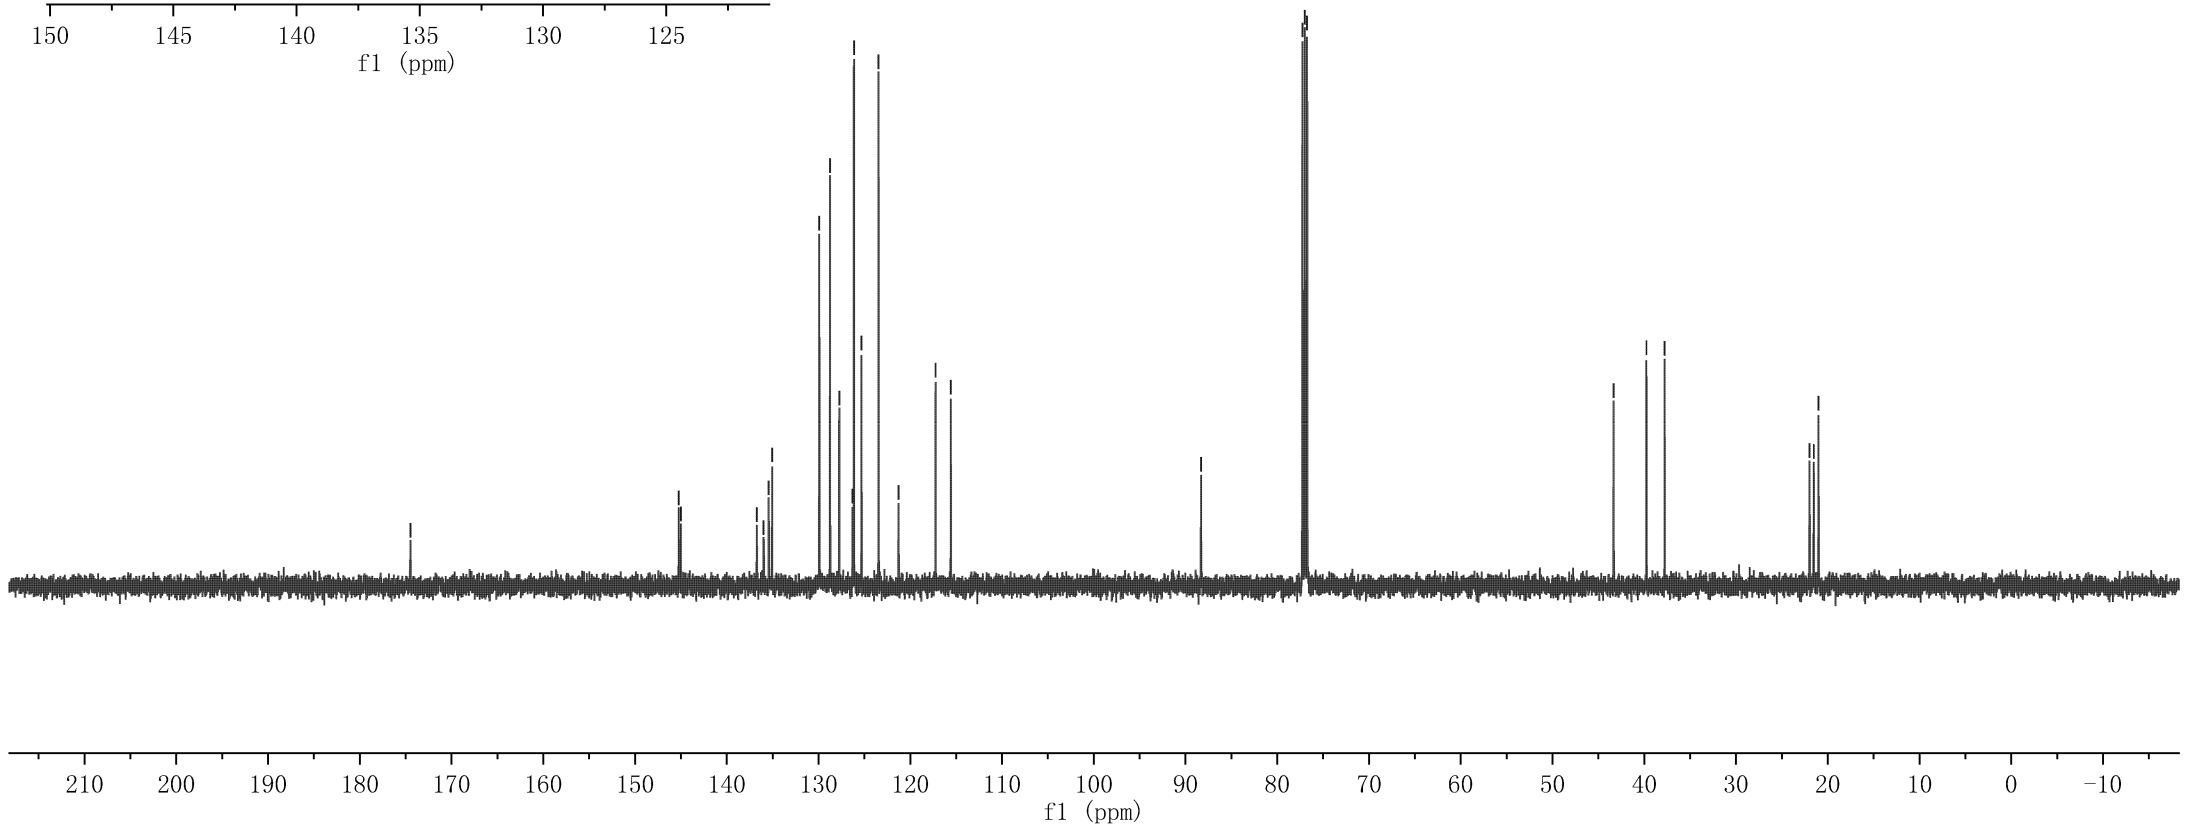

8.203  
8.185  
7.581  
7.564  
7.465  
7.461  
7.416  
7.400  
7.386  
7.367  
7.364  
7.350  
7.347  
7.344  
7.333  
7.329  
7.307  
7.303  
7.289  
7.285  
7.260  
7.234  
7.218

4.088  
4.080  
4.072  
4.054  
4.046  
4.038  
3.994  
3.978  
2.937  
2.928  
2.739  
2.736  
2.722  
2.719  
2.714  
2.711  
2.698  
2.683  
2.454  
2.429  
2.426  
2.421  
2.405  
2.400  
2.397  
2.392  
2.368  
2.340  
2.316  
2.211  
2.203  
2.186  
2.181  
2.178  
2.173  
2.157  
2.149

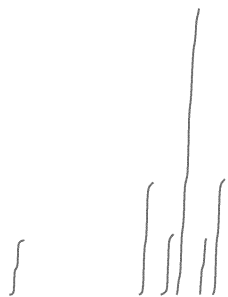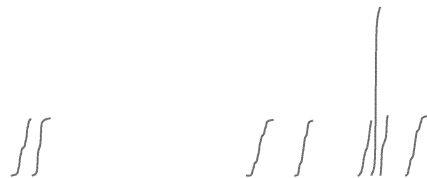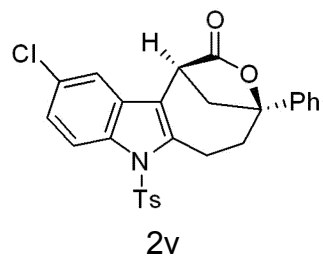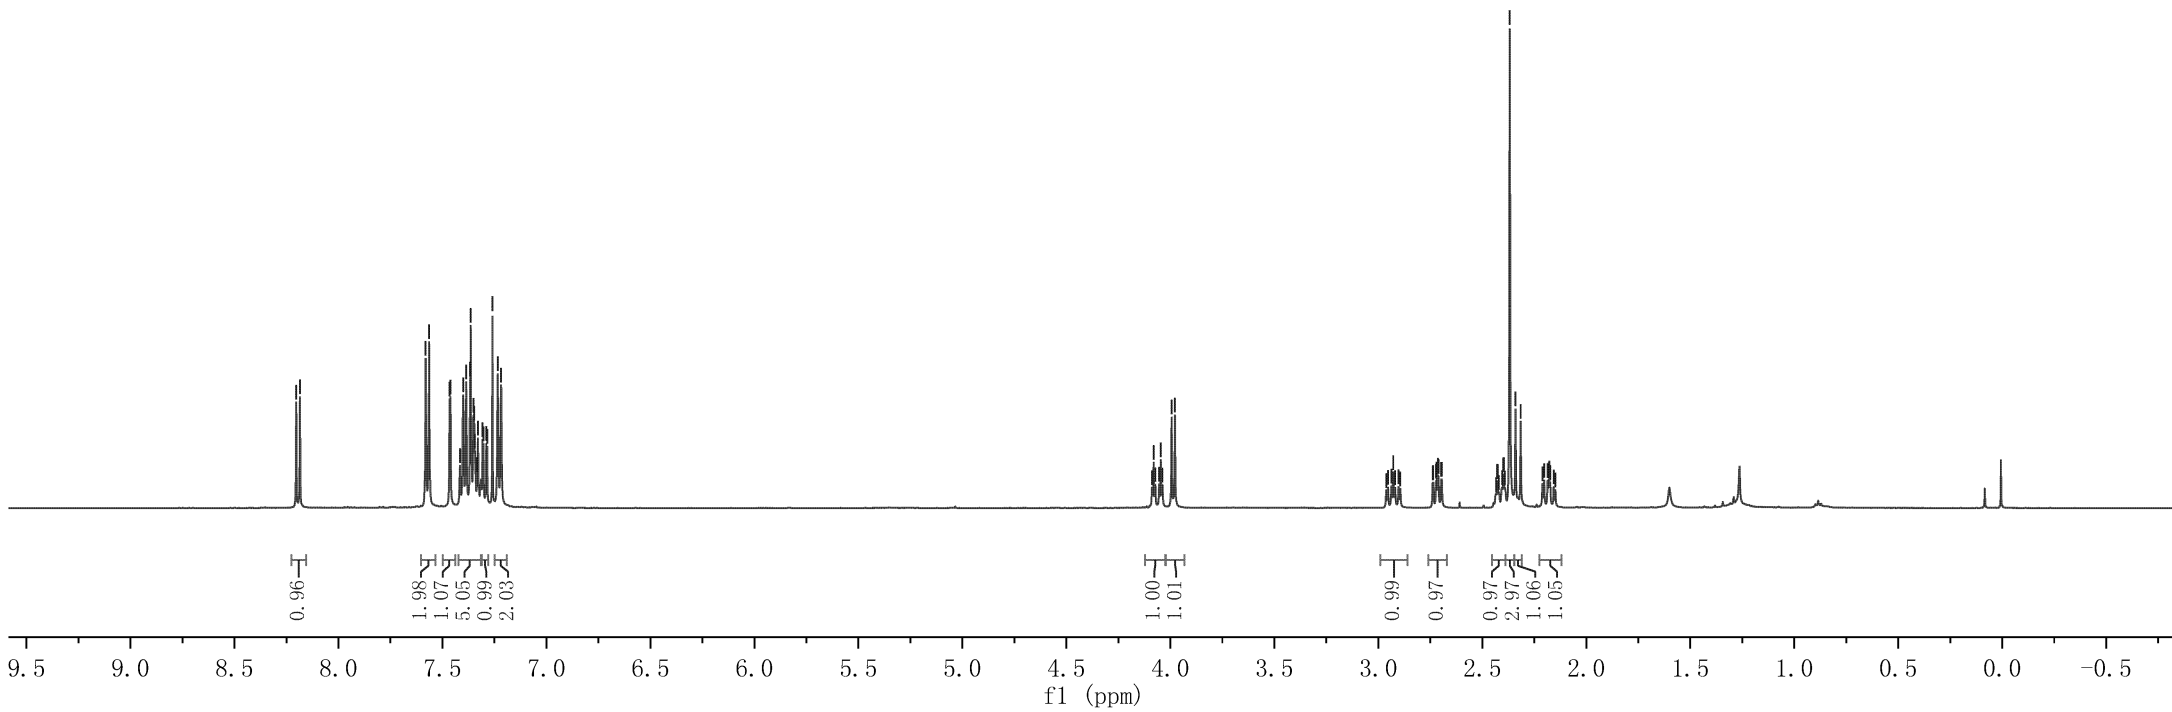

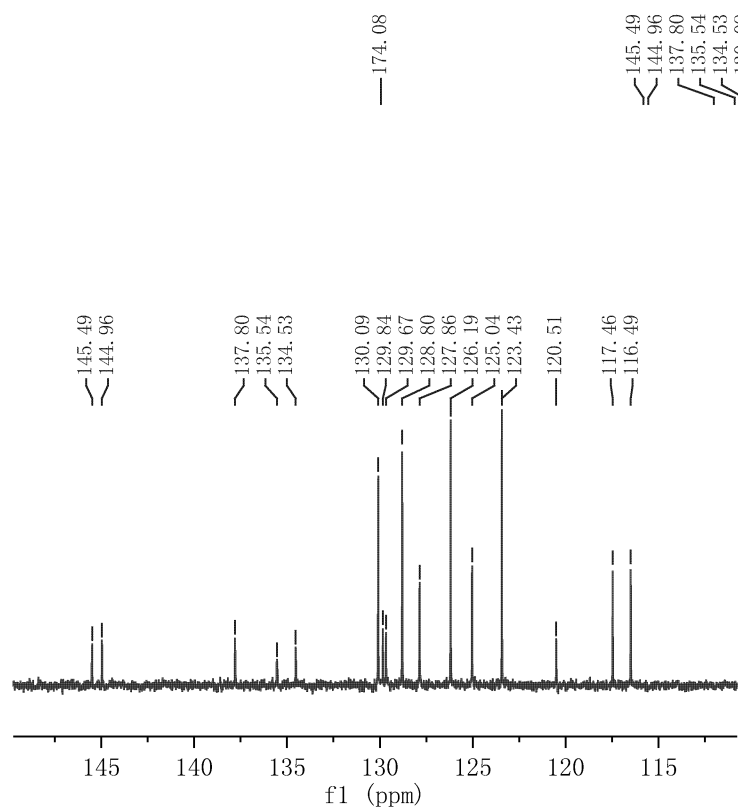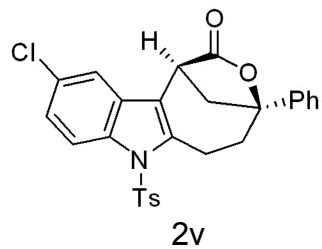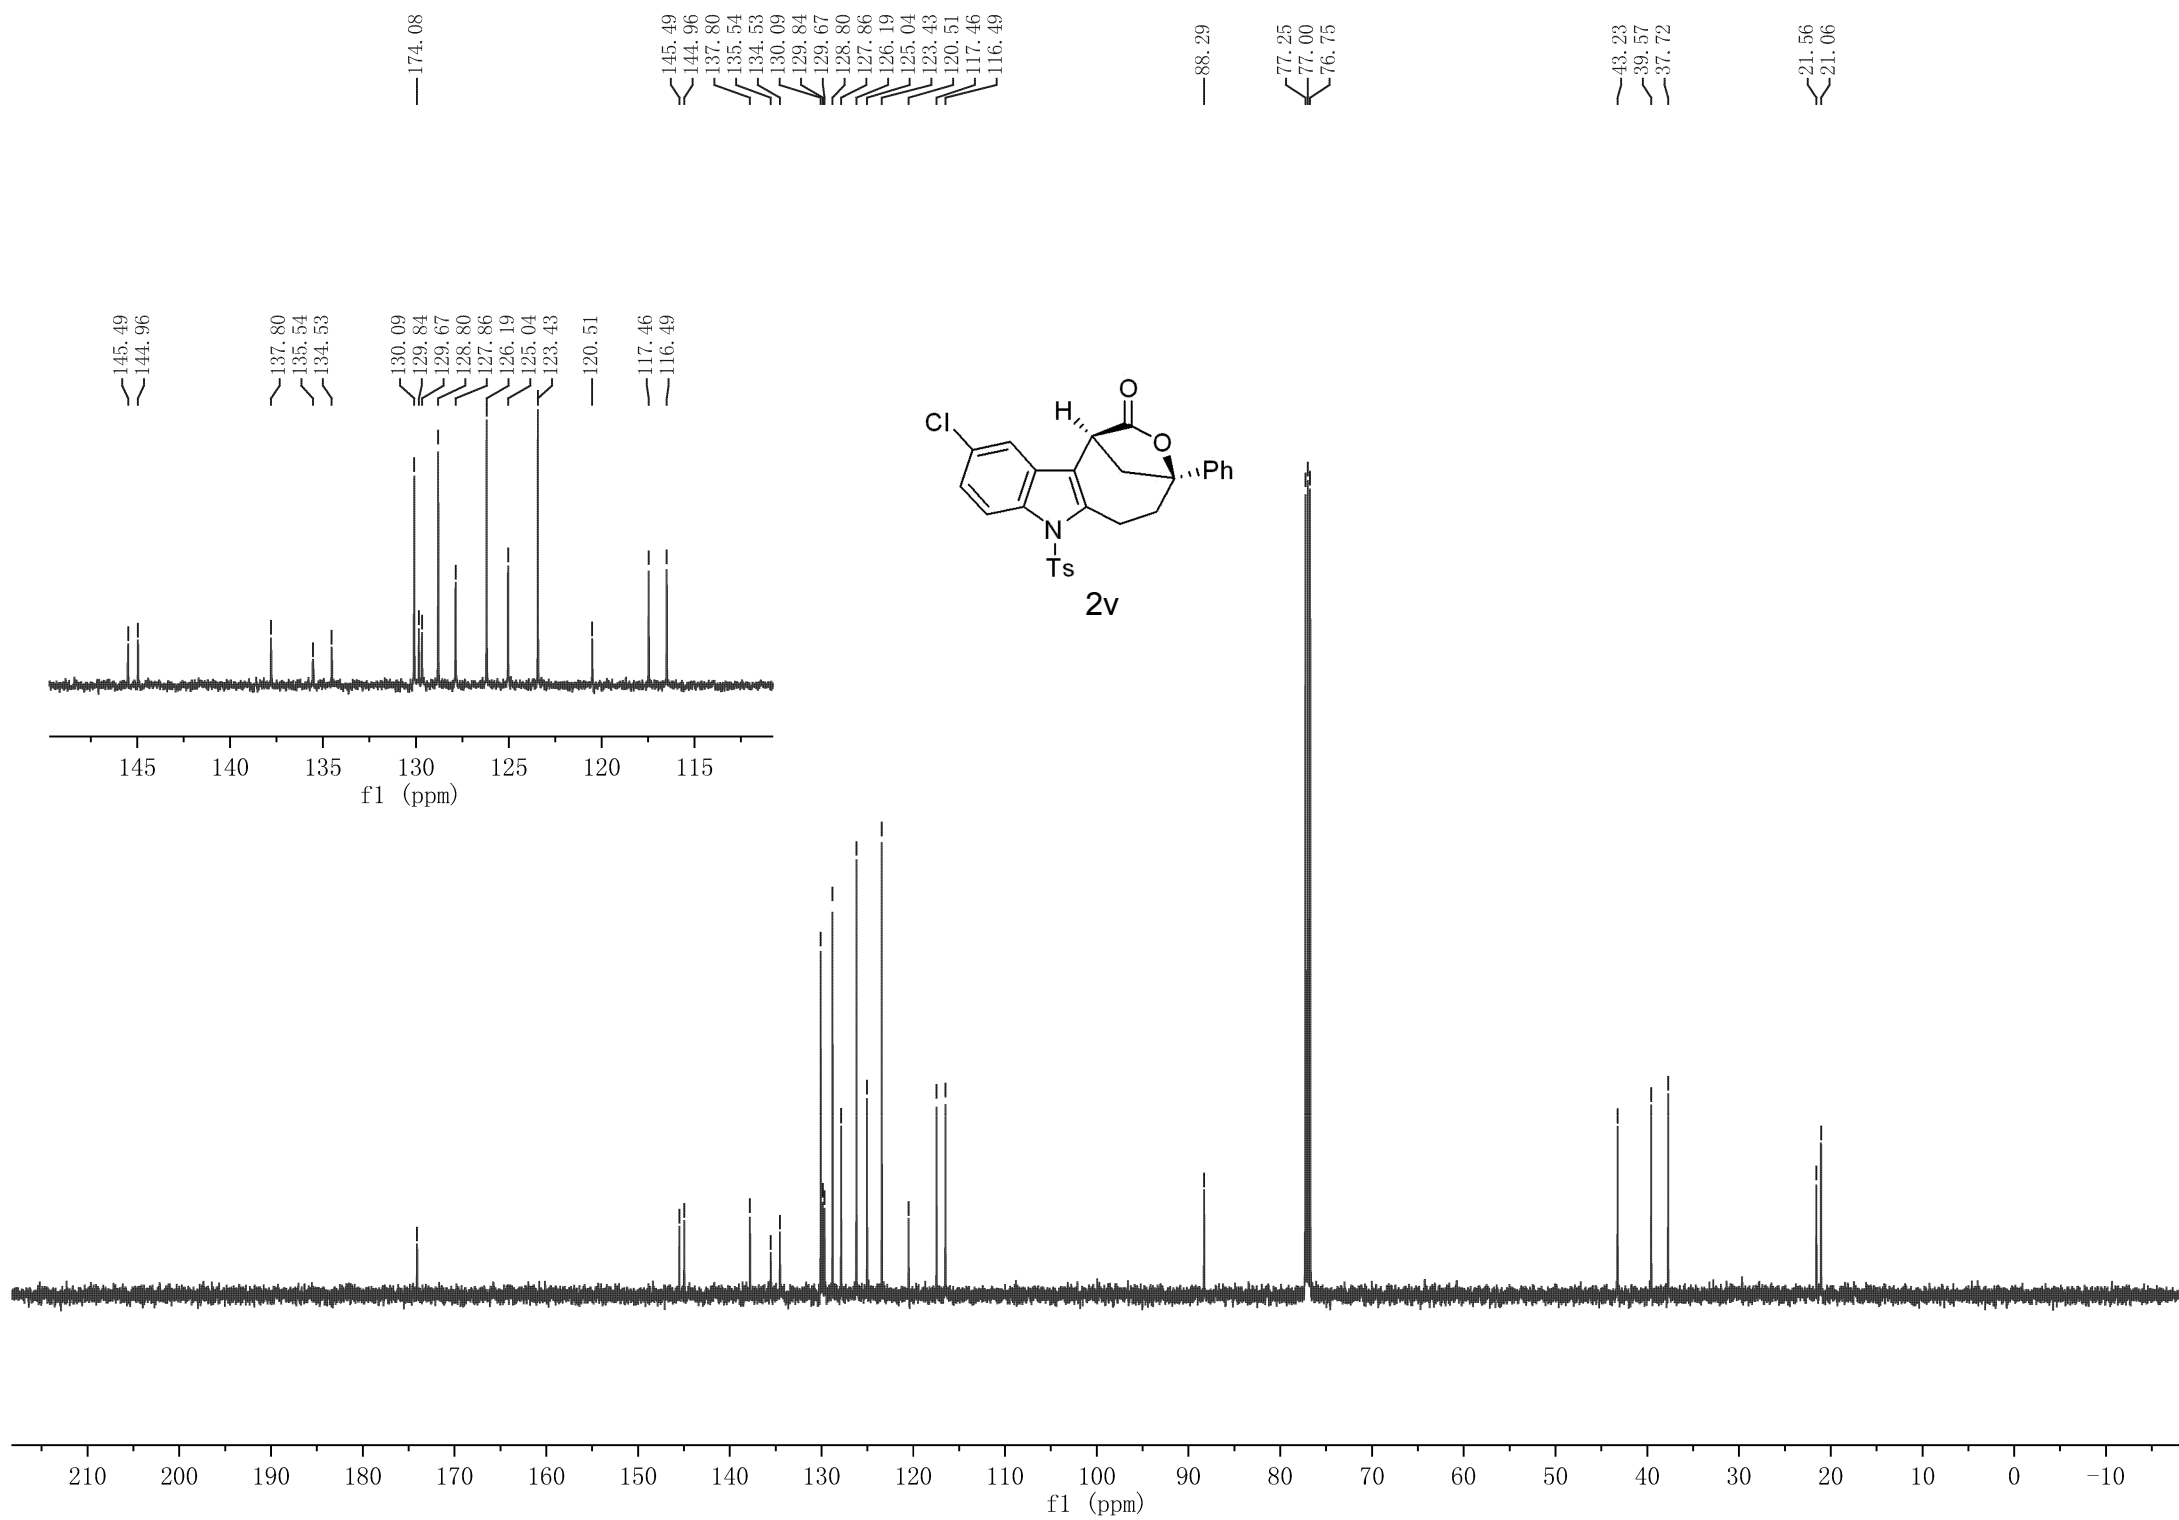

8.153  
8.135  
7.625  
7.621  
7.579  
7.562  
7.445  
7.441  
7.427  
7.424  
7.416  
7.401  
7.386  
7.366  
7.363  
7.348  
7.347  
7.334  
7.330  
7.319  
7.316  
7.260  
7.236  
7.219

4.088  
4.080  
4.072  
4.054  
4.046  
4.038  
3.993  
3.977

2.934  
2.926  
2.738  
2.736  
2.722  
2.719  
2.714  
2.711  
2.697  
2.687  
2.684  
2.429  
2.427  
2.421  
2.405  
2.400  
2.397  
2.392  
2.371  
2.338  
2.313  
2.210  
2.202  
2.185  
2.180  
2.177  
2.173  
2.156  
2.148

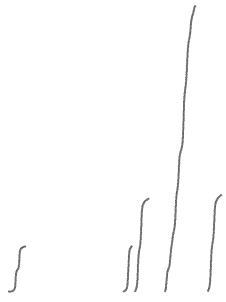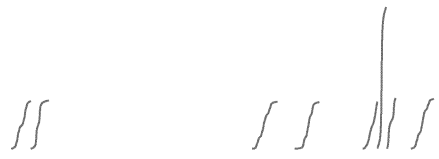

7.625  
7.621  
7.579  
7.562  
7.445  
7.441  
7.427  
7.424  
7.416  
7.401  
7.386  
7.366  
7.363  
7.348  
7.347  
7.334  
7.330  
7.319  
7.316  
7.260  
7.236  
7.219

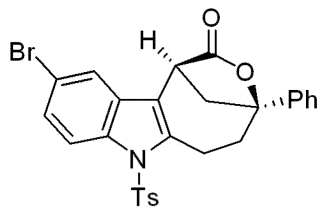

2w

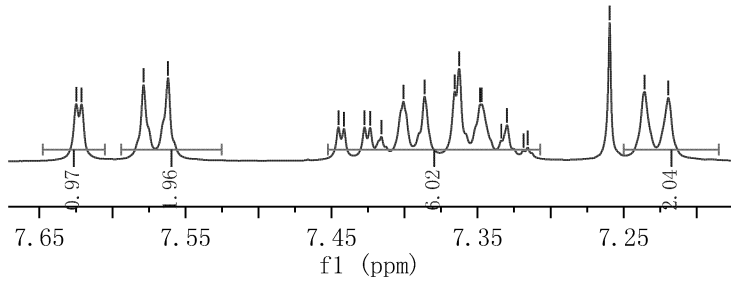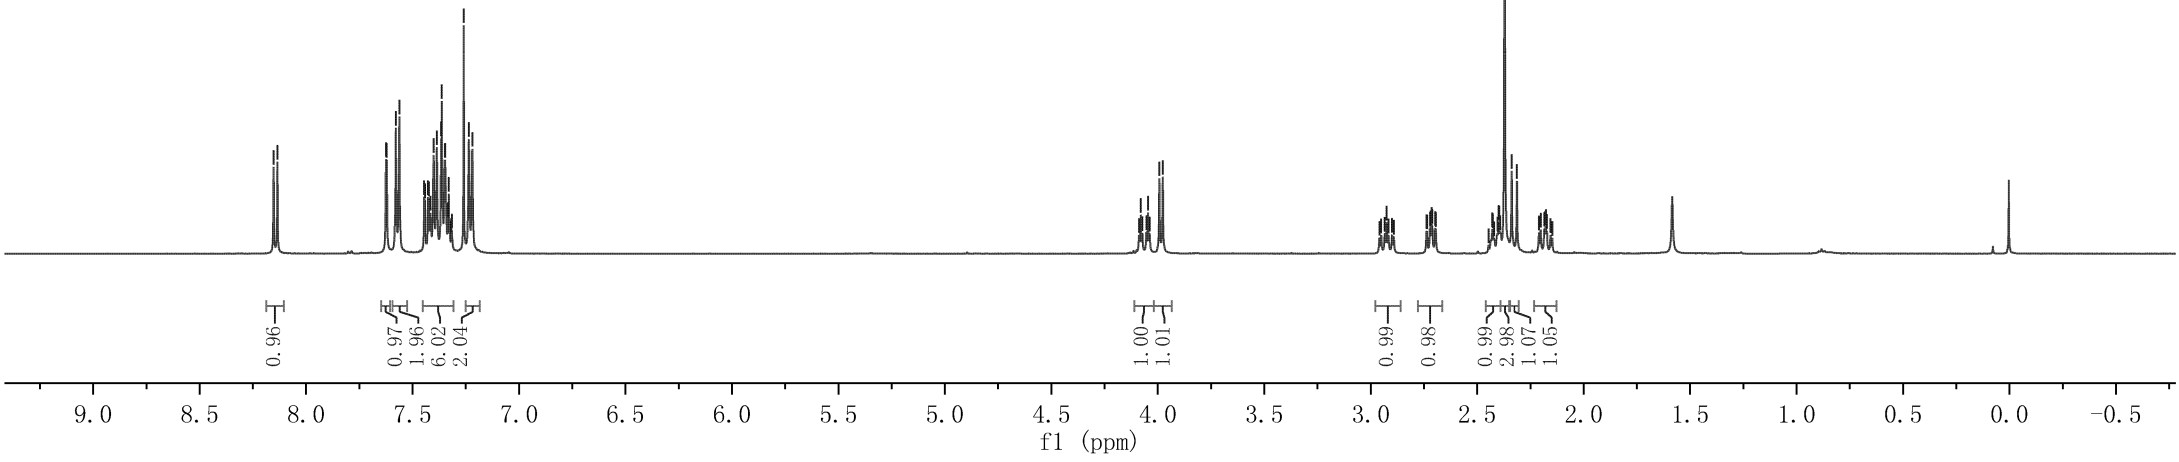

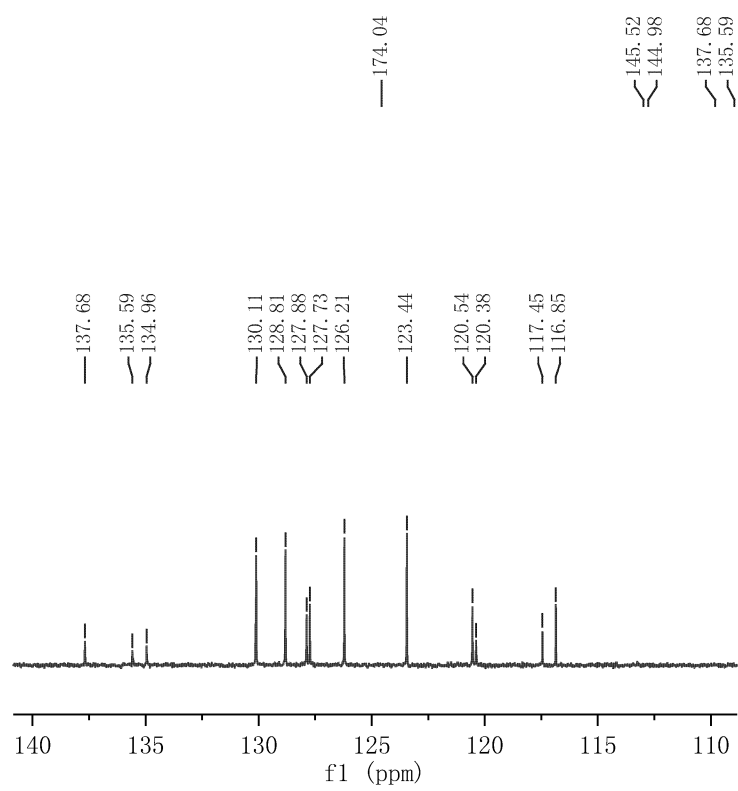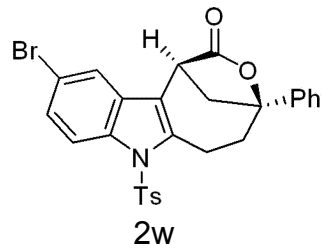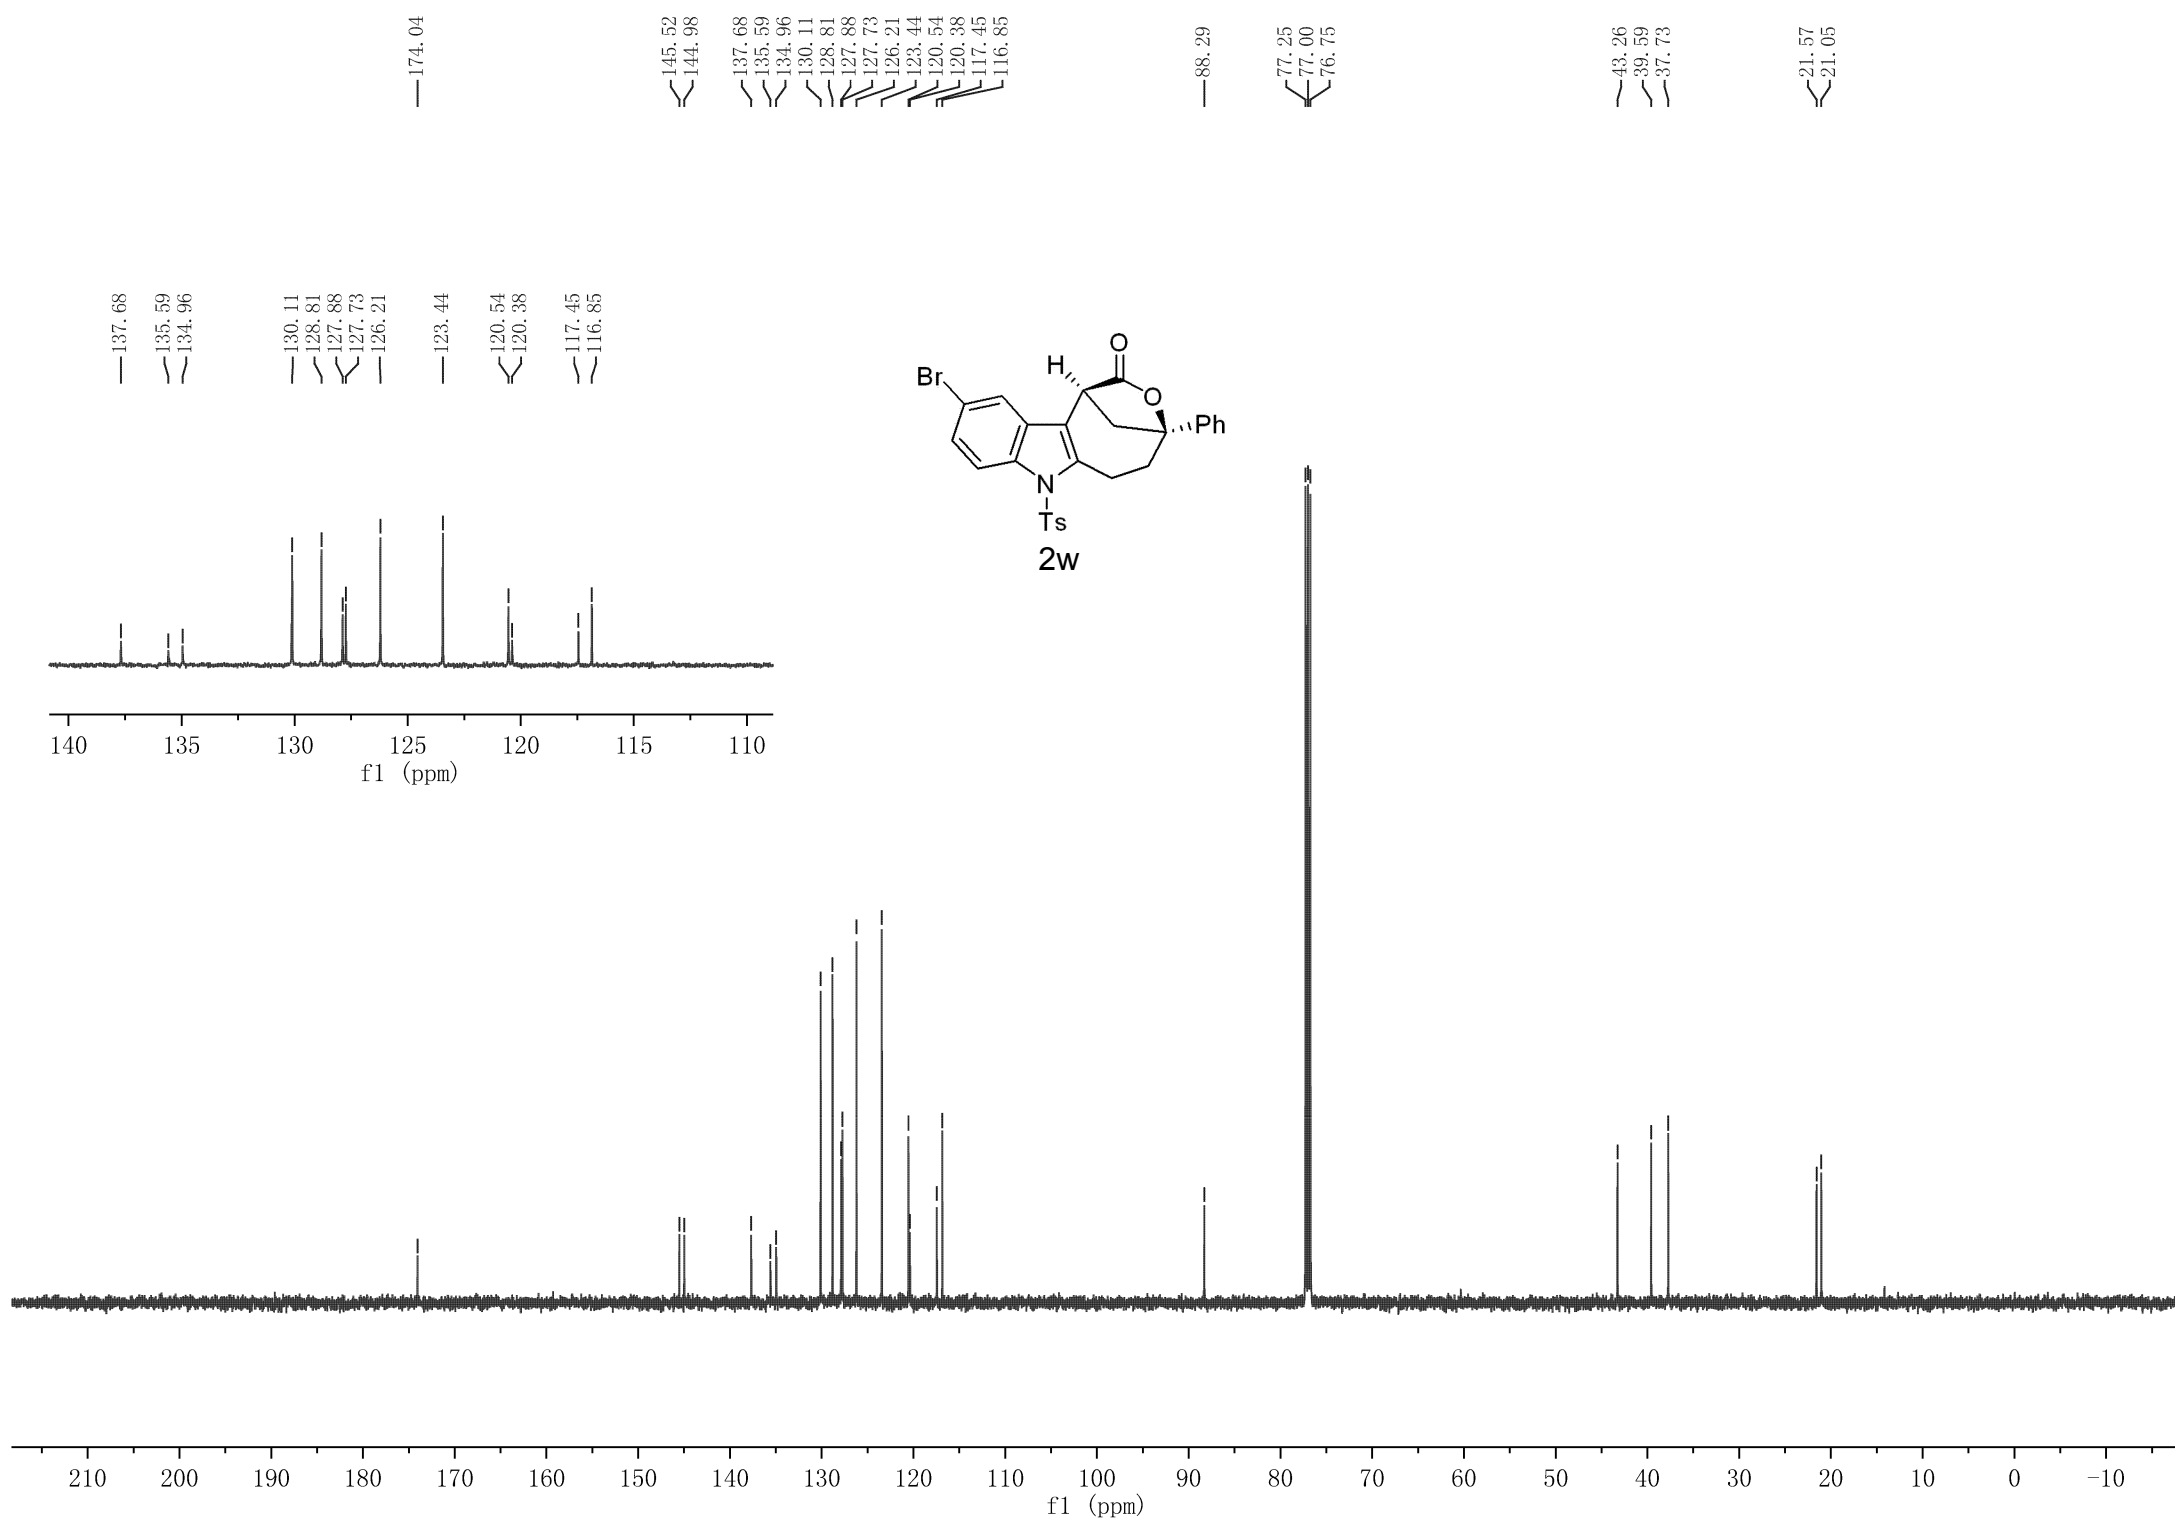

8.280  
8.261  
7.593  
7.572  
7.491  
7.474  
7.471  
7.369  
7.366  
7.351  
7.348  
7.331  
7.327  
7.323  
7.319  
7.304  
7.301  
7.285  
7.283  
7.268  
7.260  
7.248  
7.214  
7.193

4.112  
4.102  
4.092  
4.071  
4.059  
4.051

2.950  
2.939  
2.734  
2.730  
2.713  
2.710  
2.703  
2.700  
2.683  
2.679  
2.625  
2.421  
2.415  
2.385  
2.366  
2.352  
2.330  
2.299  
2.198  
2.188  
2.167  
2.161  
2.157  
2.152  
2.131  
2.120

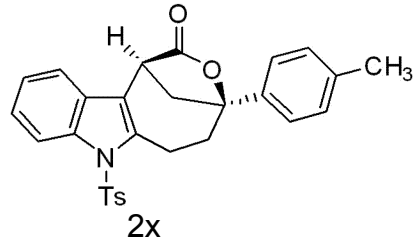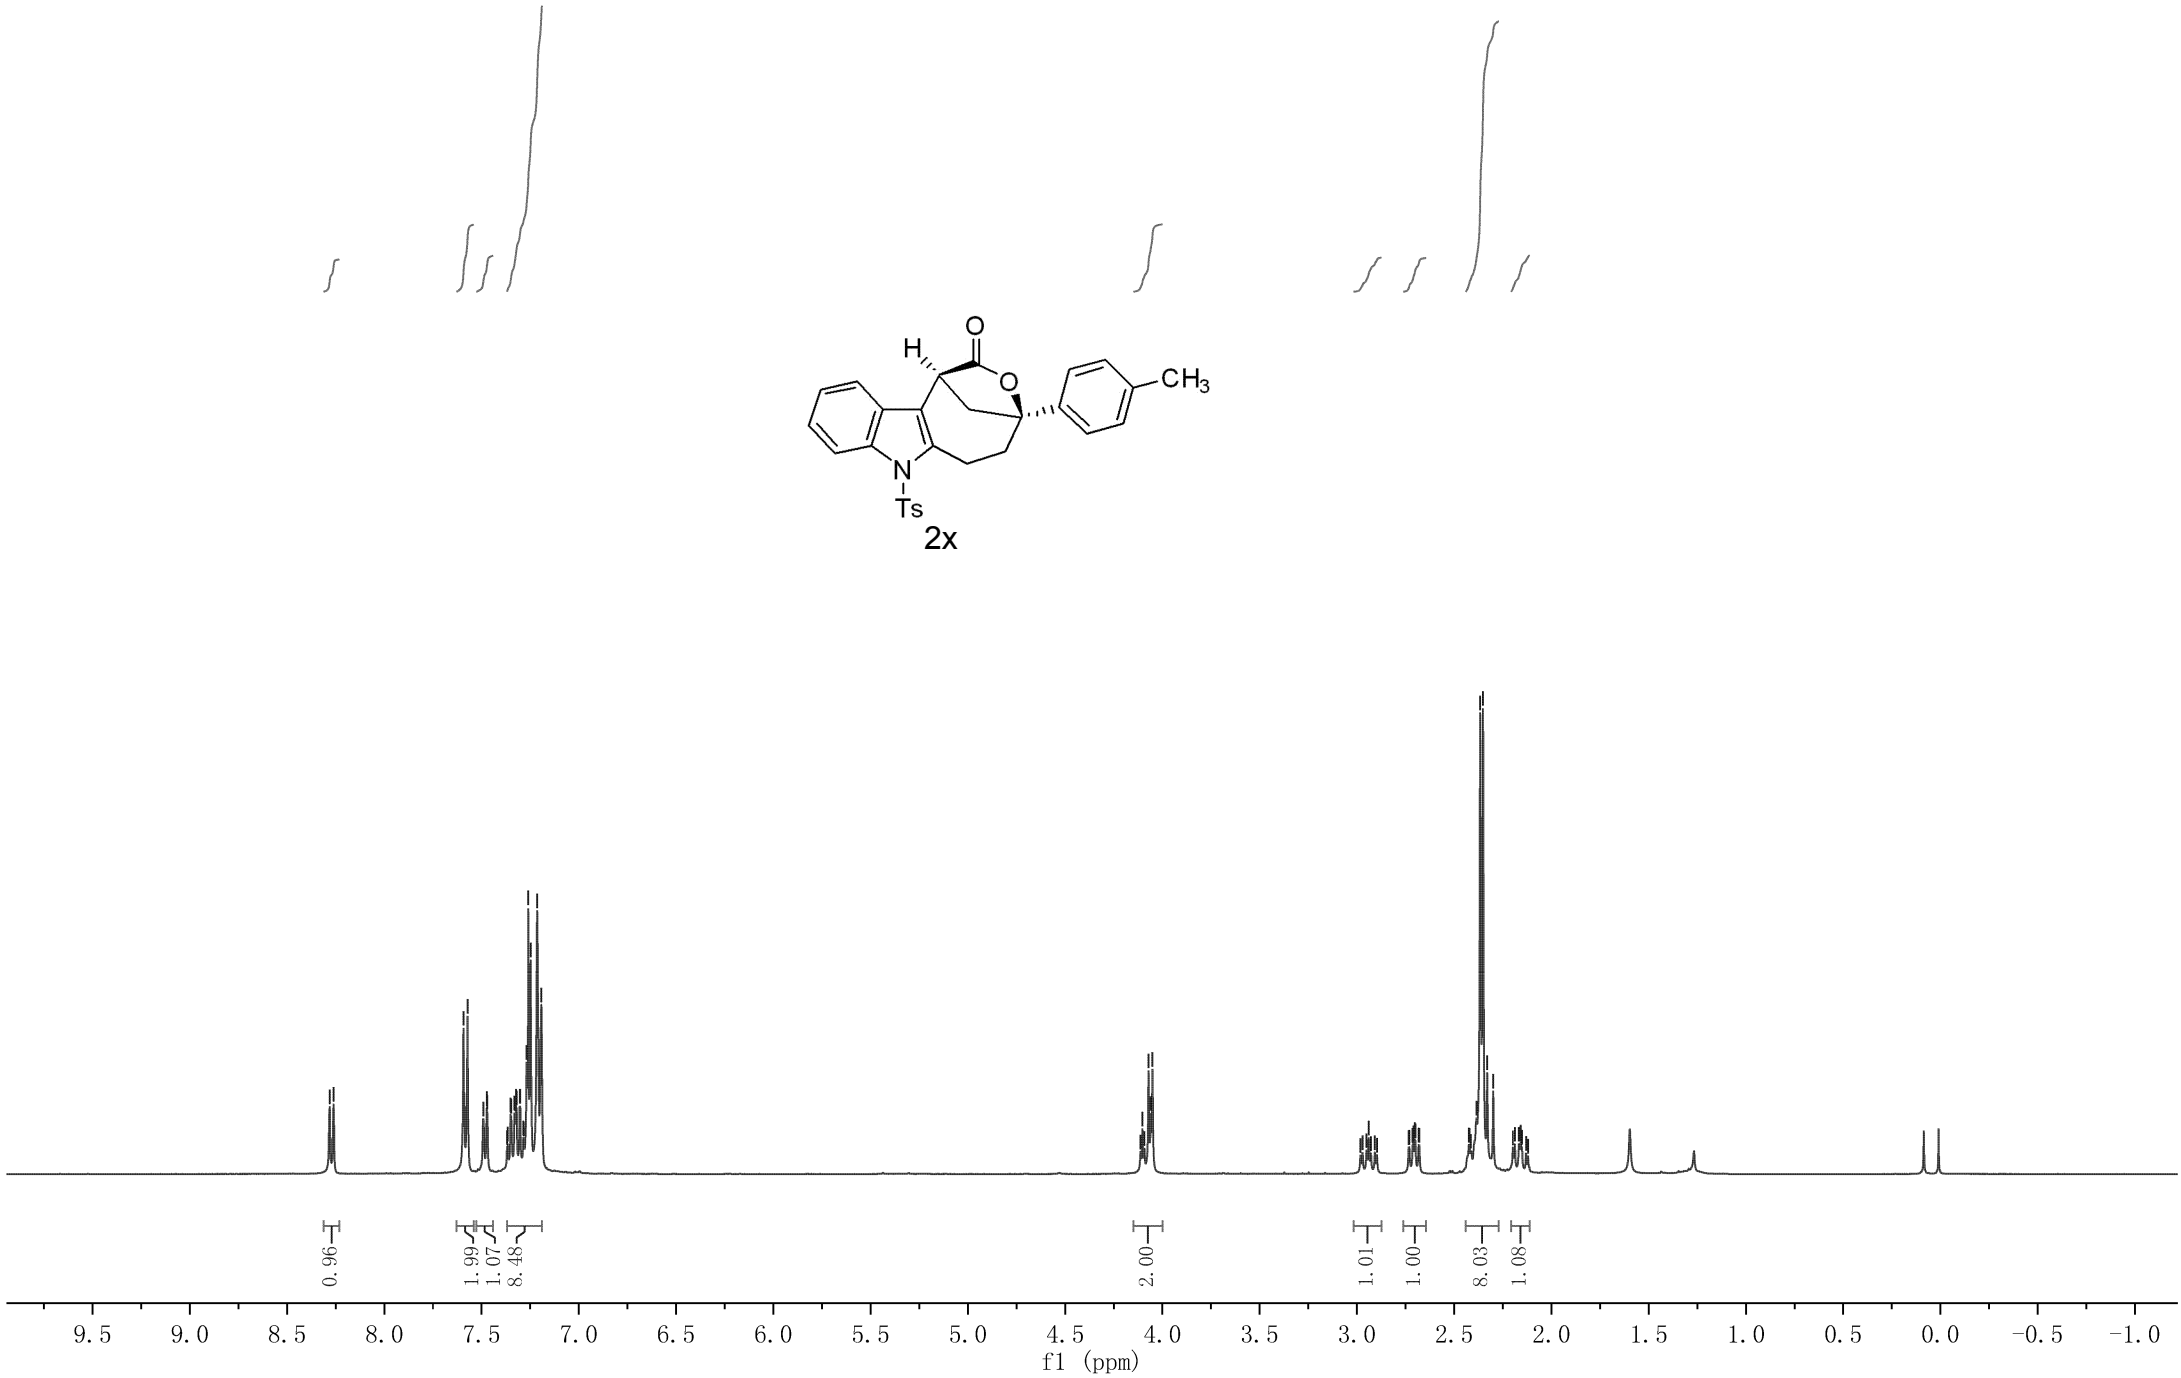

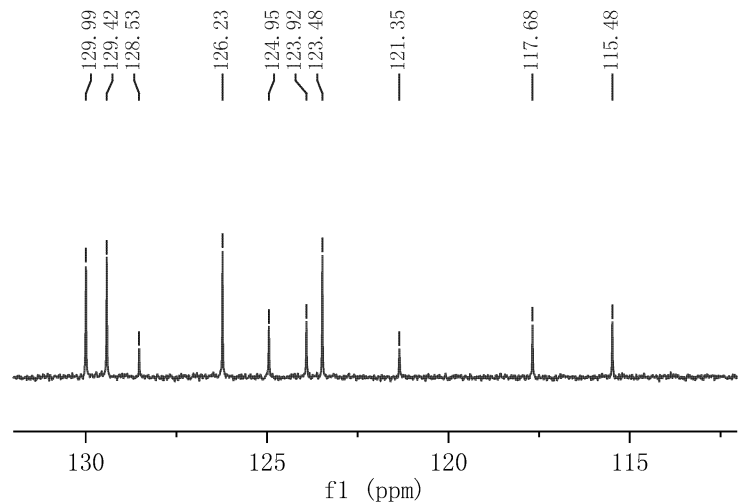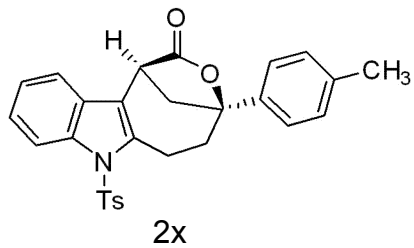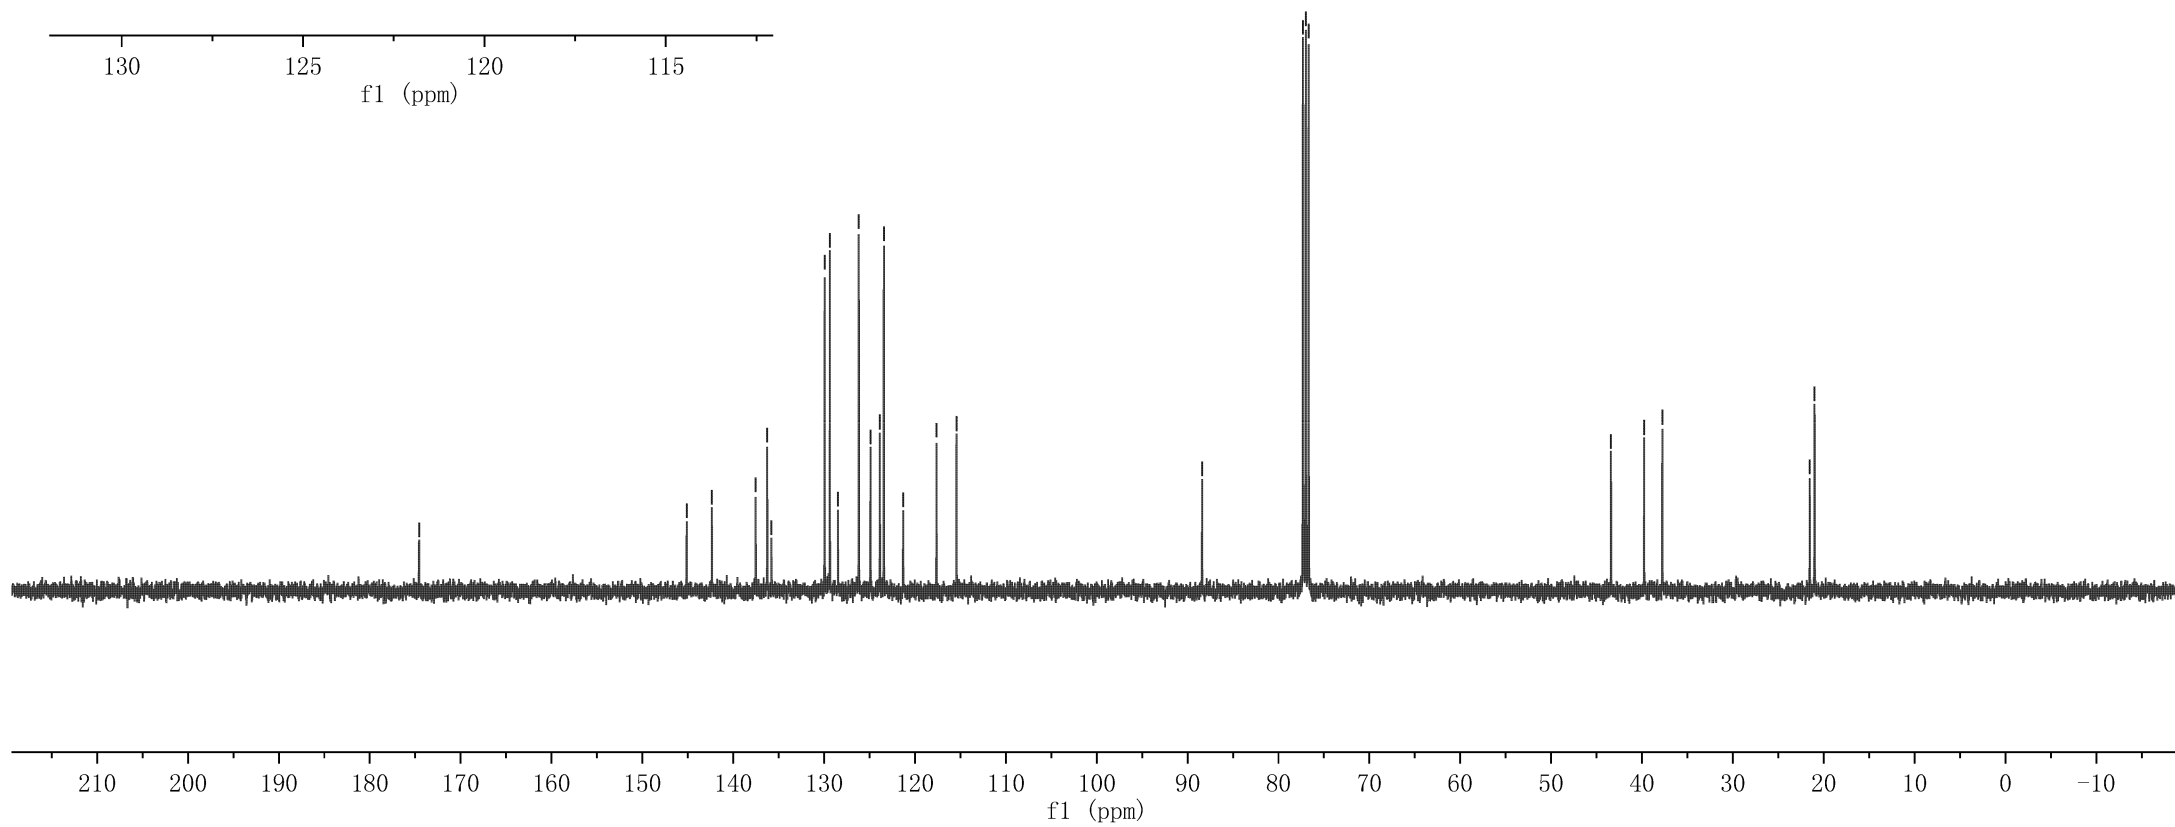

8.275  
8.274  
8.257  
8.254  
7.591  
7.570  
7.484  
7.466  
7.463  
7.387  
7.382  
7.376  
7.372  
7.368  
7.365  
7.360  
7.354  
7.351  
7.334  
7.330  
7.323  
7.320  
7.316  
7.310  
7.305  
7.302  
7.294  
7.289  
7.283  
7.260  
7.214  
7.194

4.125  
4.115  
4.105  
4.082  
4.072  
4.062

2.936  
2.925  
2.893  
2.702  
2.698  
2.682  
2.678  
2.672  
2.668  
2.651  
2.647  
2.643  
2.386  
2.383  
2.376  
2.373  
2.351  
2.339  
2.308  
2.197  
2.187  
2.166  
2.161  
2.156  
2.151  
2.130  
2.120

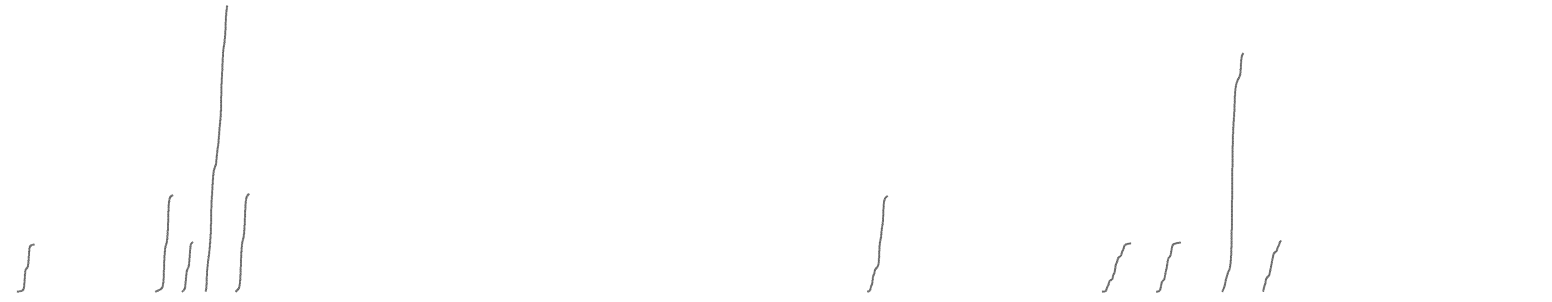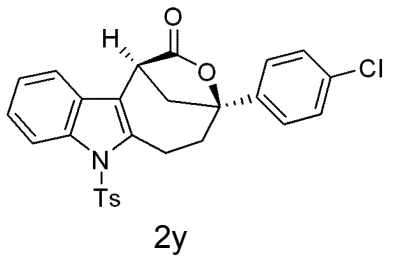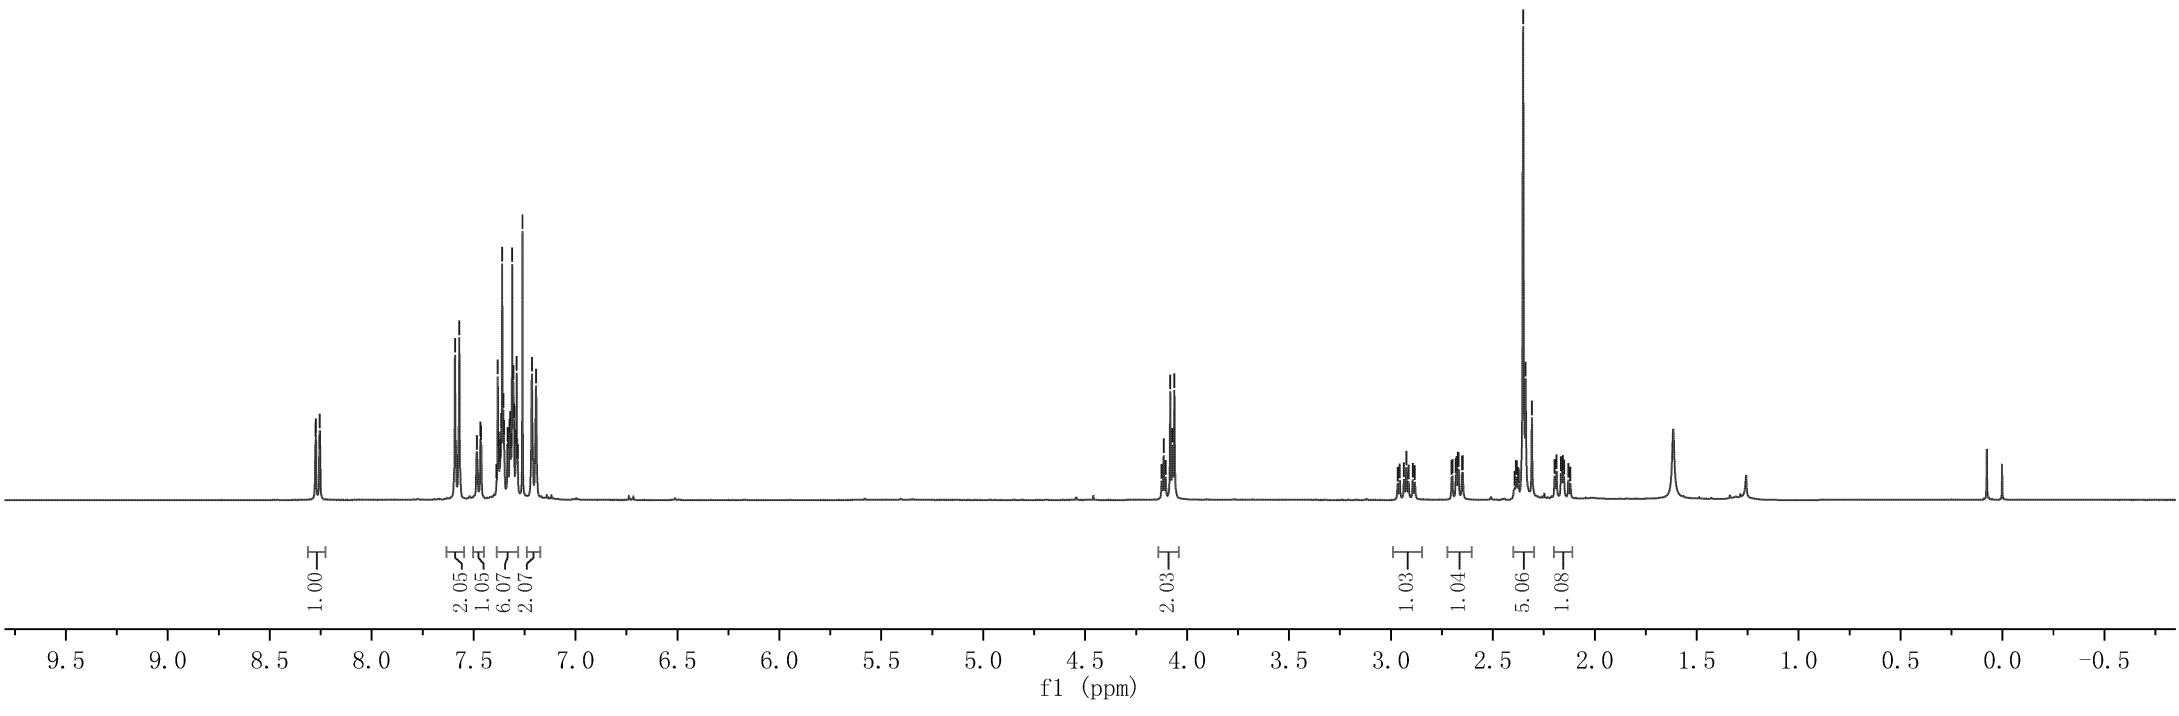



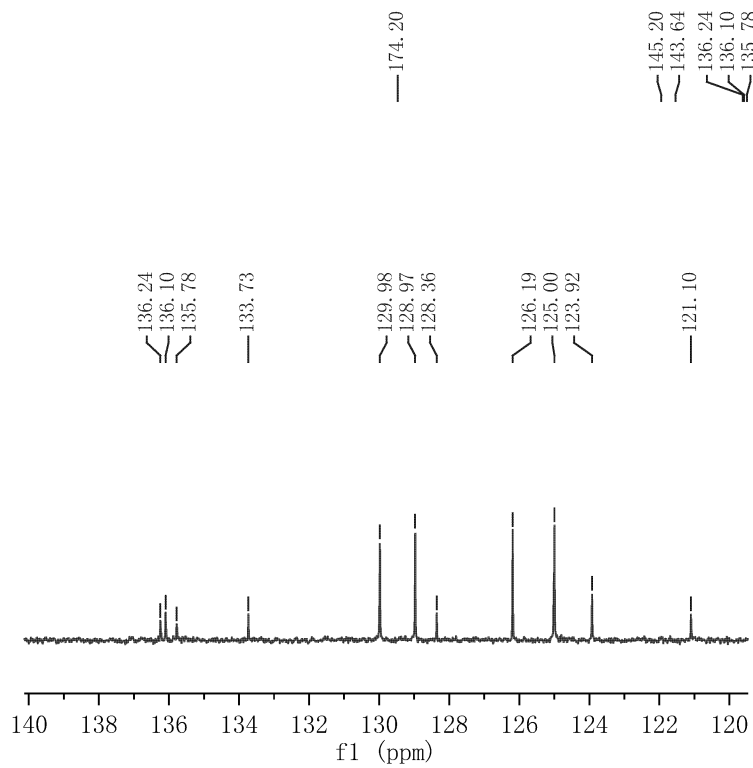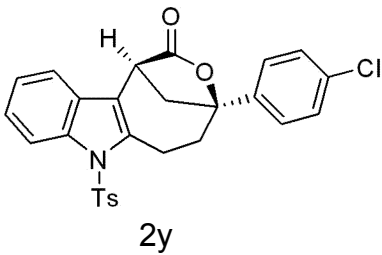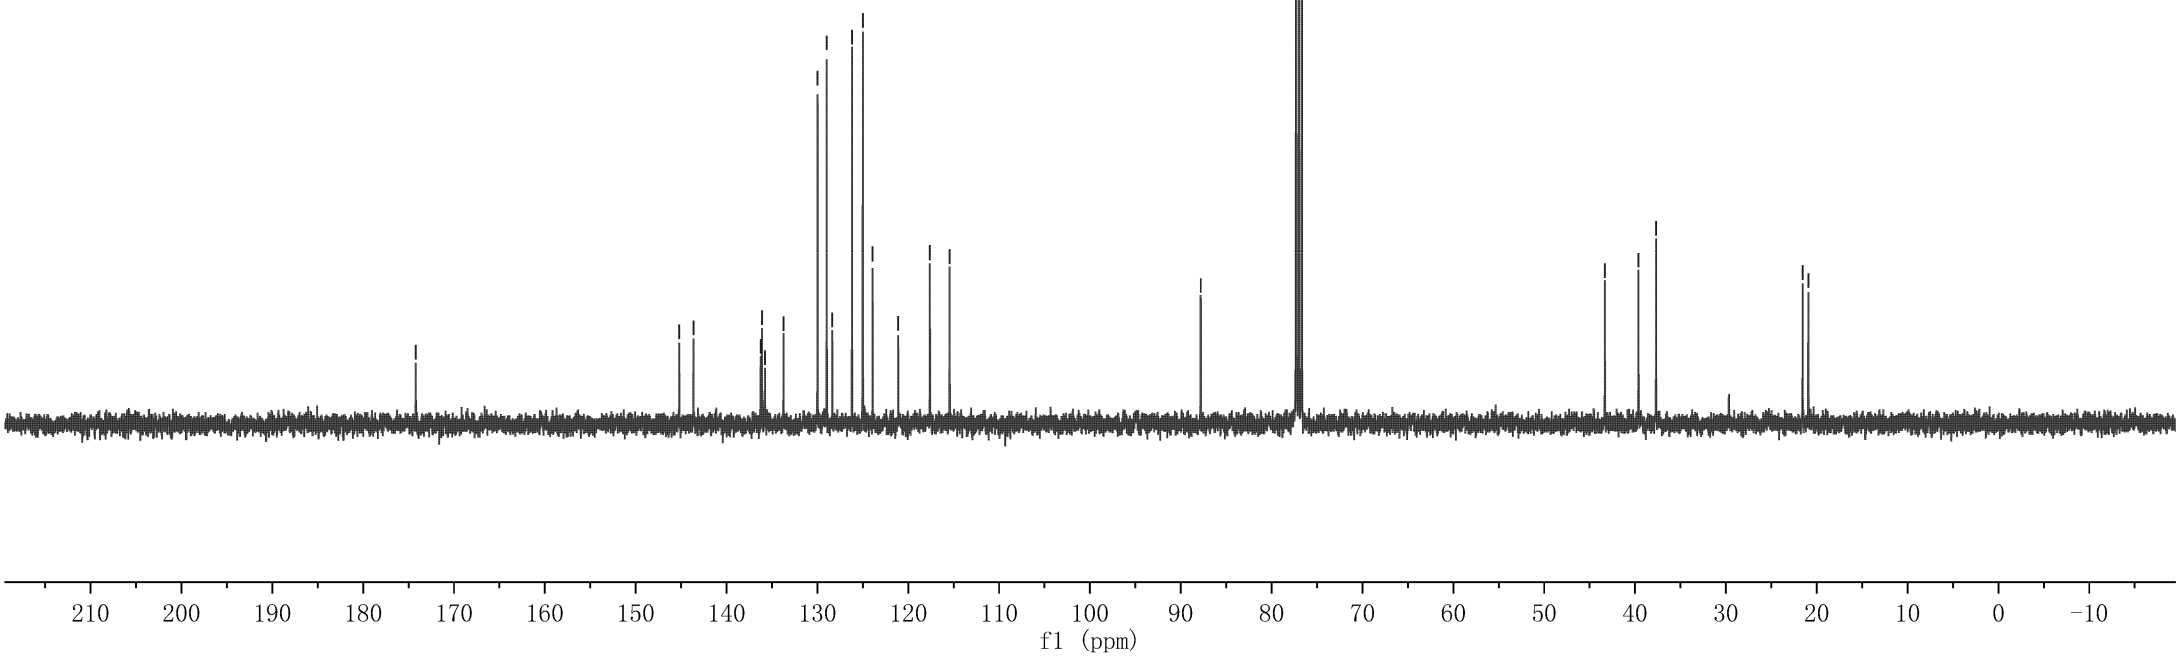

8.267  
8.248  
7.580  
7.560  
7.479  
7.461  
7.363  
7.359  
7.344  
7.342  
7.325  
7.320  
7.316  
7.300  
7.297  
7.283  
7.211  
7.190

4.029  
4.019  
4.009  
3.984  
3.976  
3.964

2.880  
2.869  
2.848  
2.837  
2.826  
2.805  
2.795  
2.445  
2.425  
2.354  
2.229  
2.224  
1.947  
1.916  
1.866  
1.856  
1.835  
1.830  
1.825  
1.820  
1.799  
1.789  
1.589

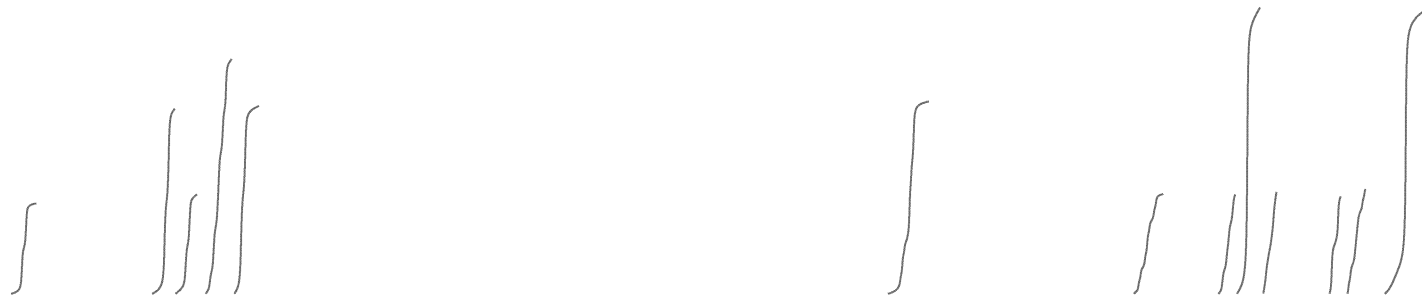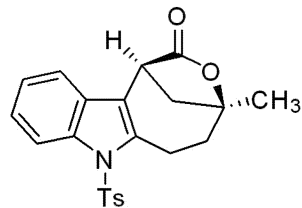

2z

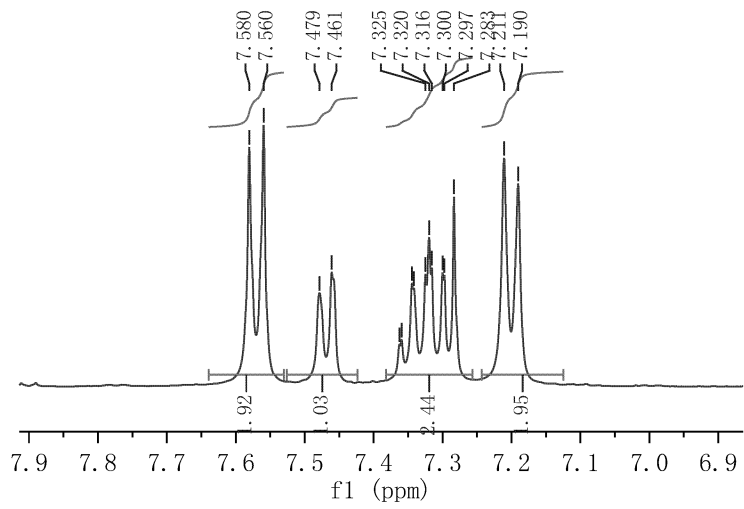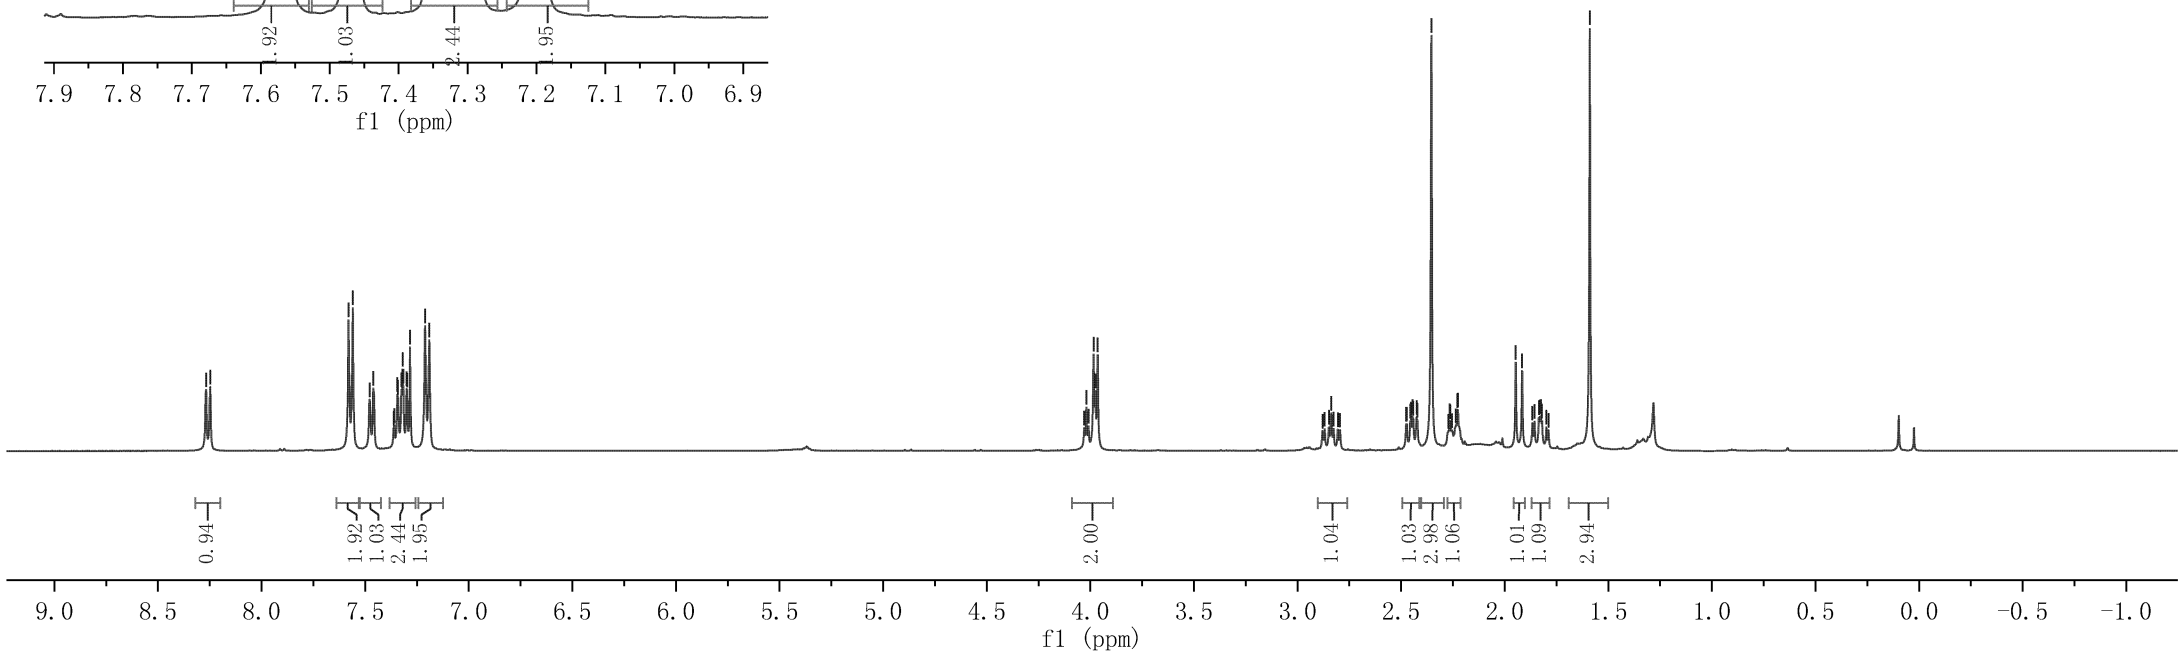

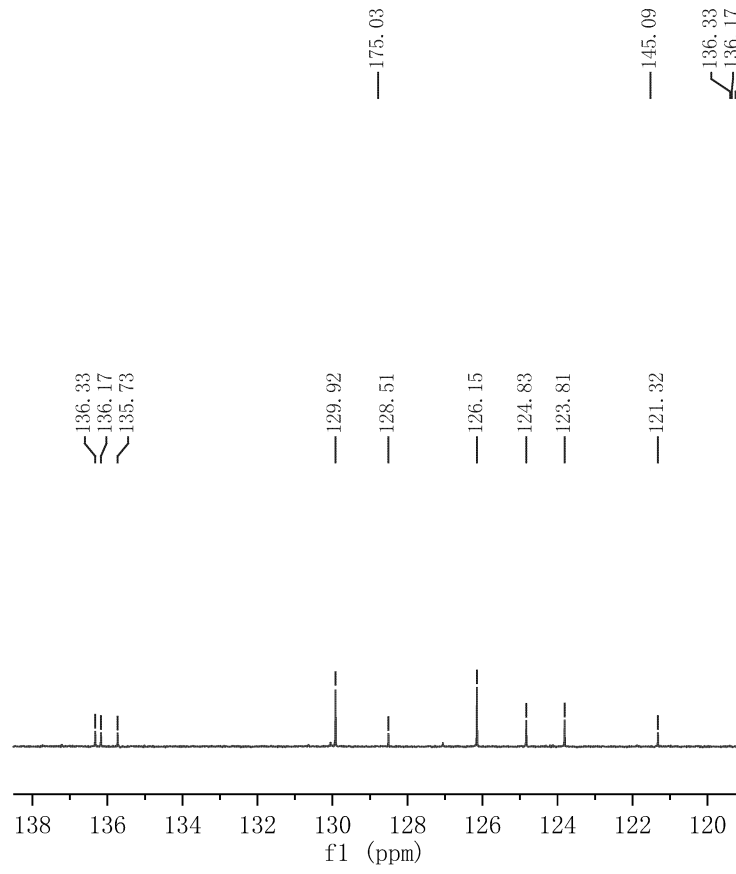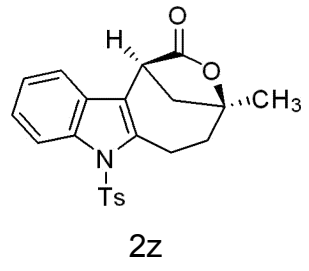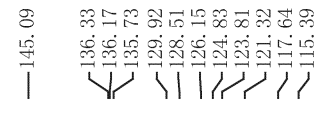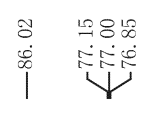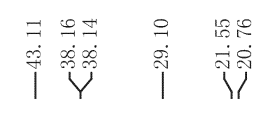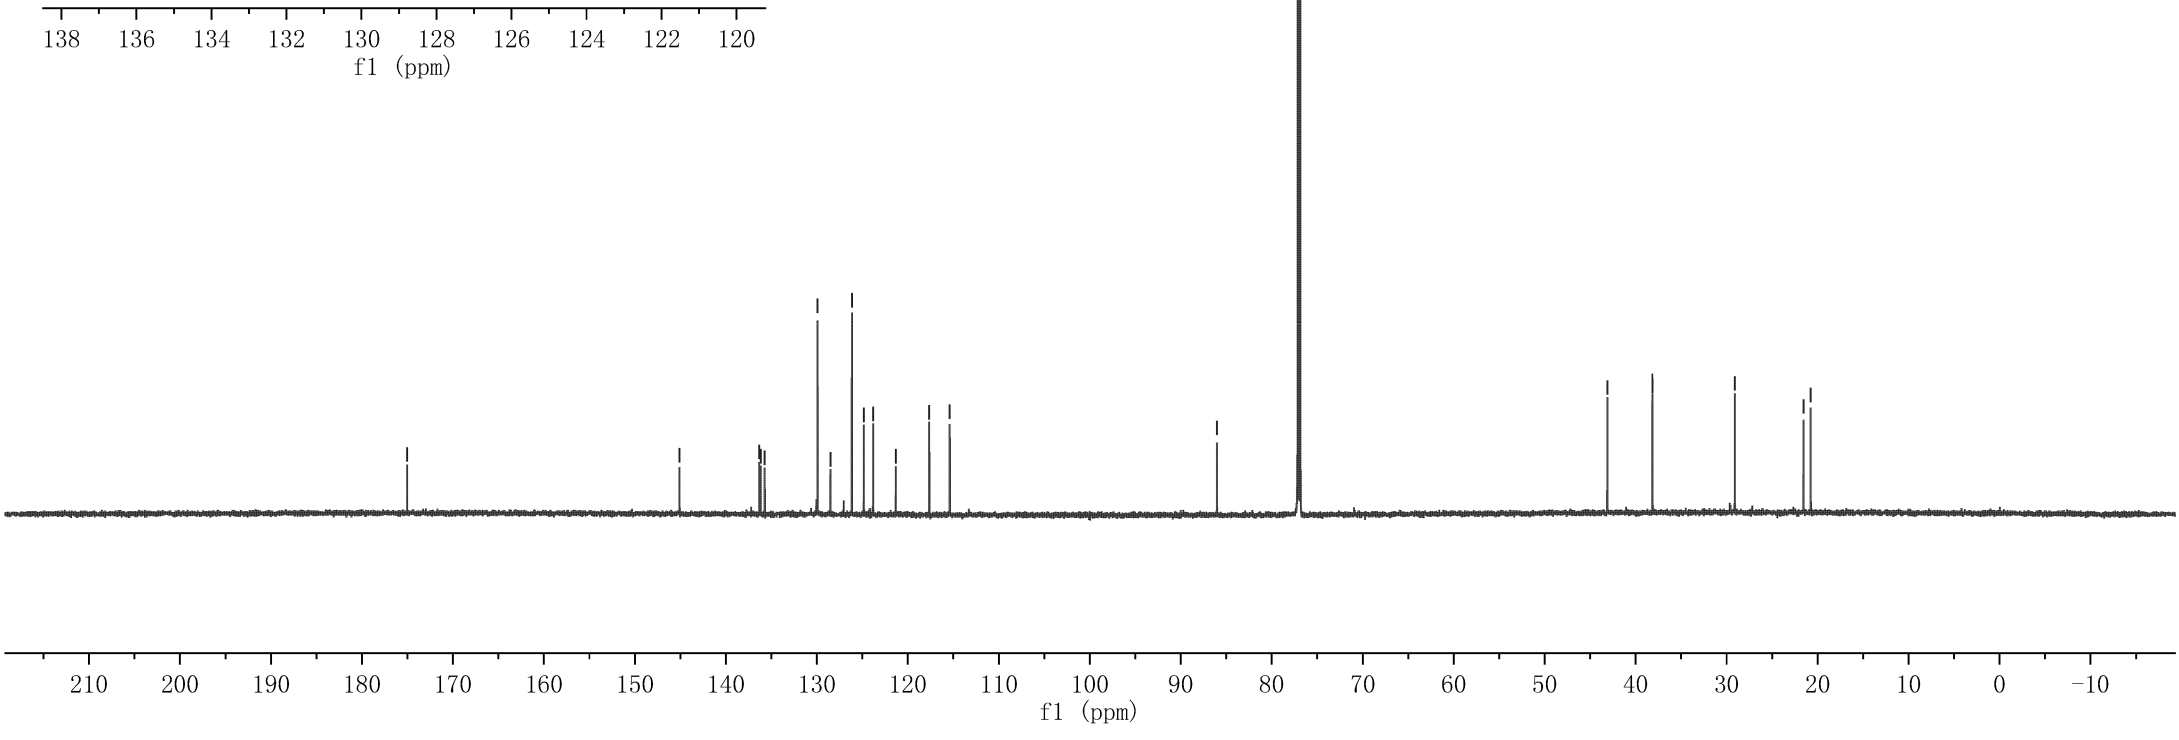

129.92  
126.16  
124.84  
123.82  
117.66  
115.41

43.12  
38.19  
38.17  
29.10  
21.53  
20.81

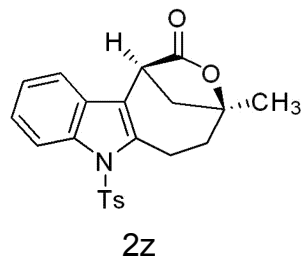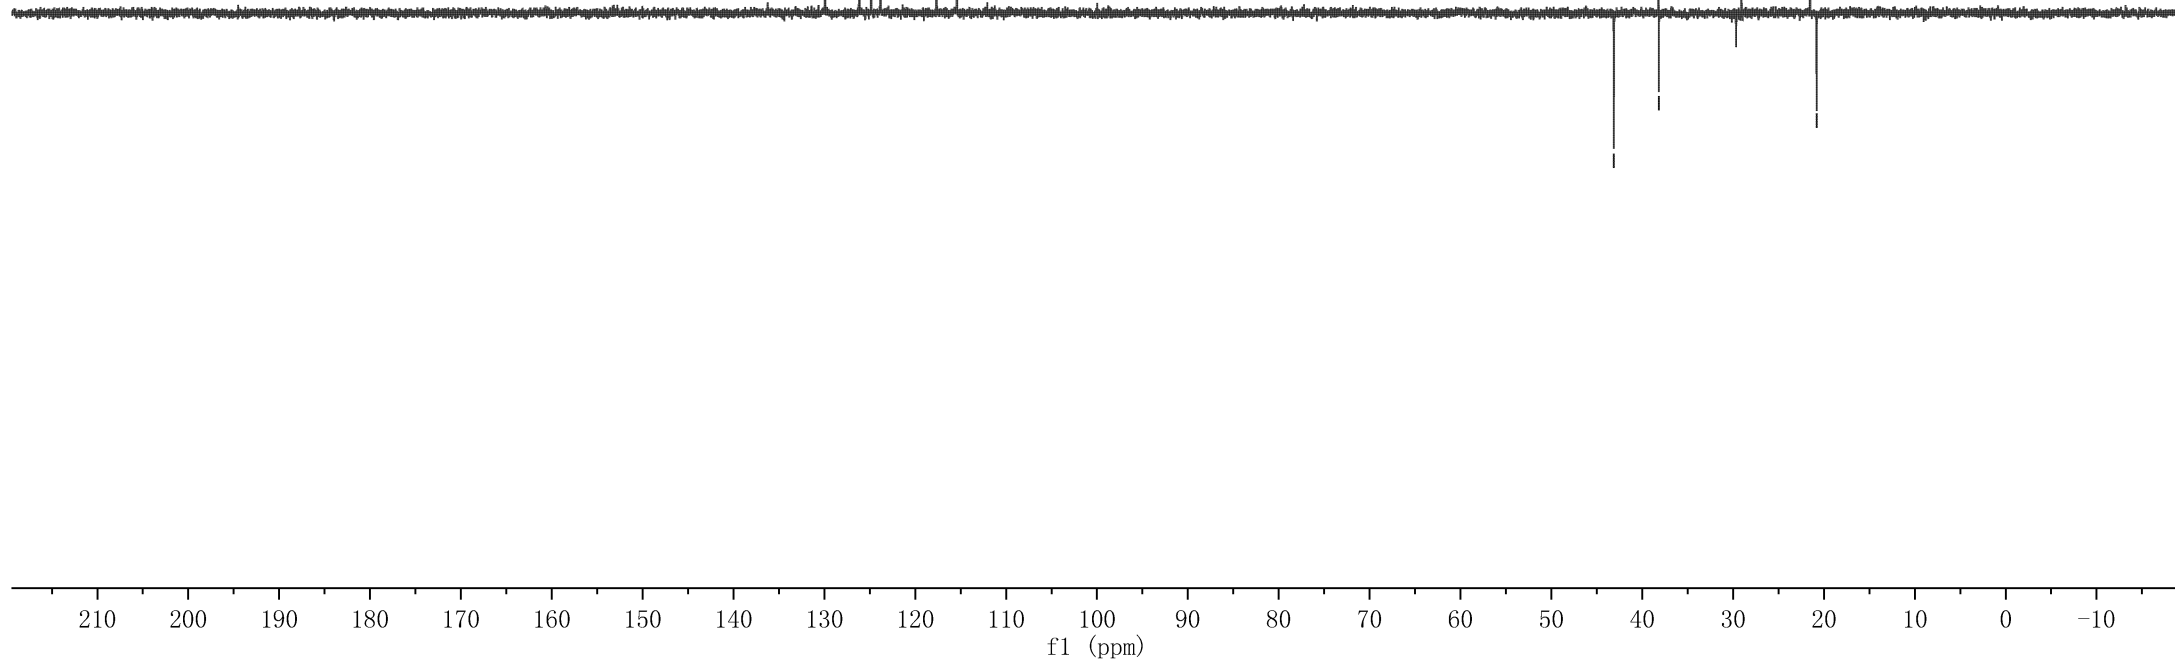

7.534  
7.526  
7.517  
7.511  
7.503  
7.493  
7.422  
7.412  
7.404  
7.399  
7.396  
7.389  
7.380  
7.270  
7.260  
7.252  
7.245  
7.238  
7.227

5.170  
5.152  
5.134

3.823  
3.804  
3.114  
3.064  
3.030  
3.021  
3.014  
2.857  
2.837  
2.826  
2.816  
2.806  
2.786  
2.475  
2.461  
2.447  
2.439  
2.042  
2.011  
1.995  
1.979  
1.978  
1.965  
1.959  
1.957  
1.952  
1.950  
1.944  
1.930  
1.929  
1.915  
1.913

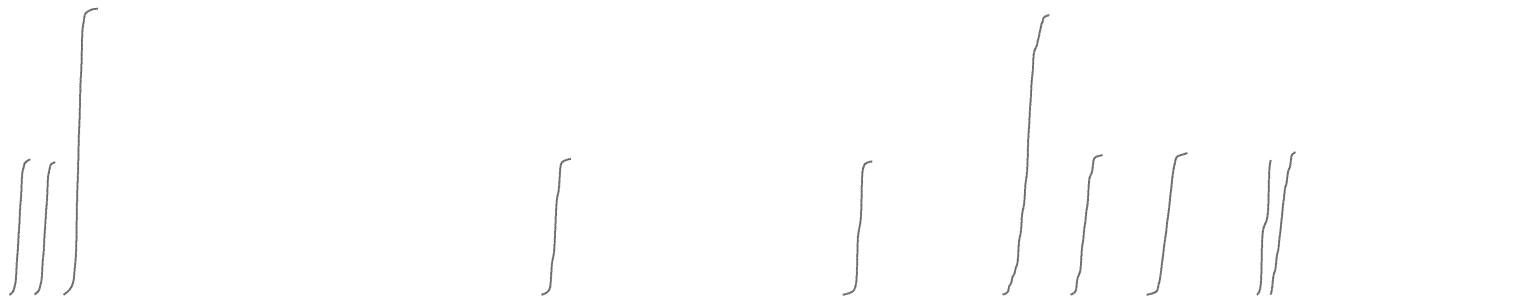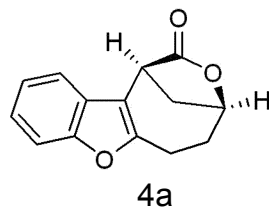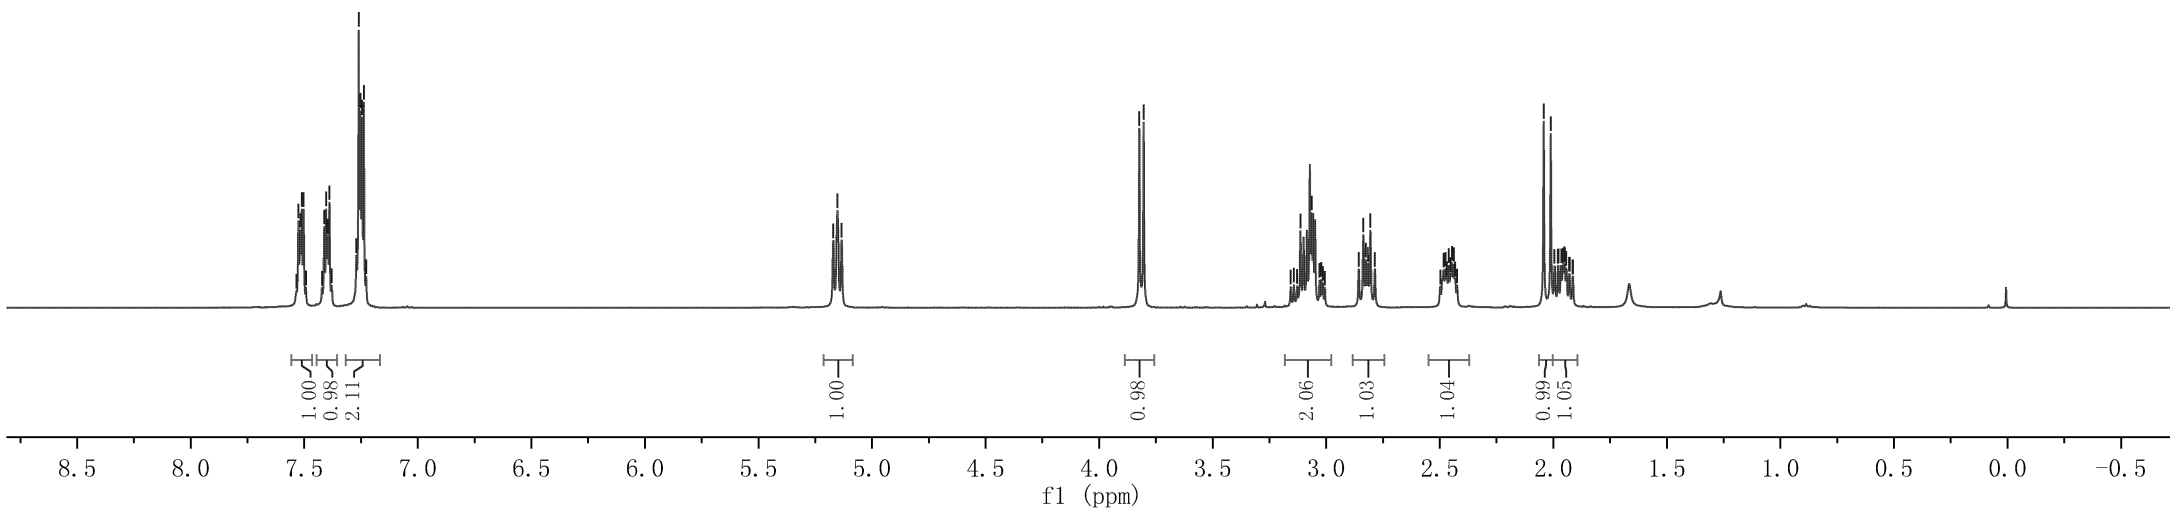

— 175.50

154.45  
153.37

127.62  
123.93  
122.76  
118.12  
115.24  
110.92

78.33  
77.32  
77.00  
76.68

37.17  
34.91

— 30.01

— 22.03

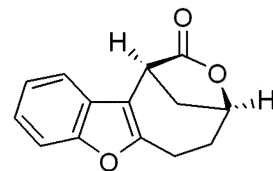

4a

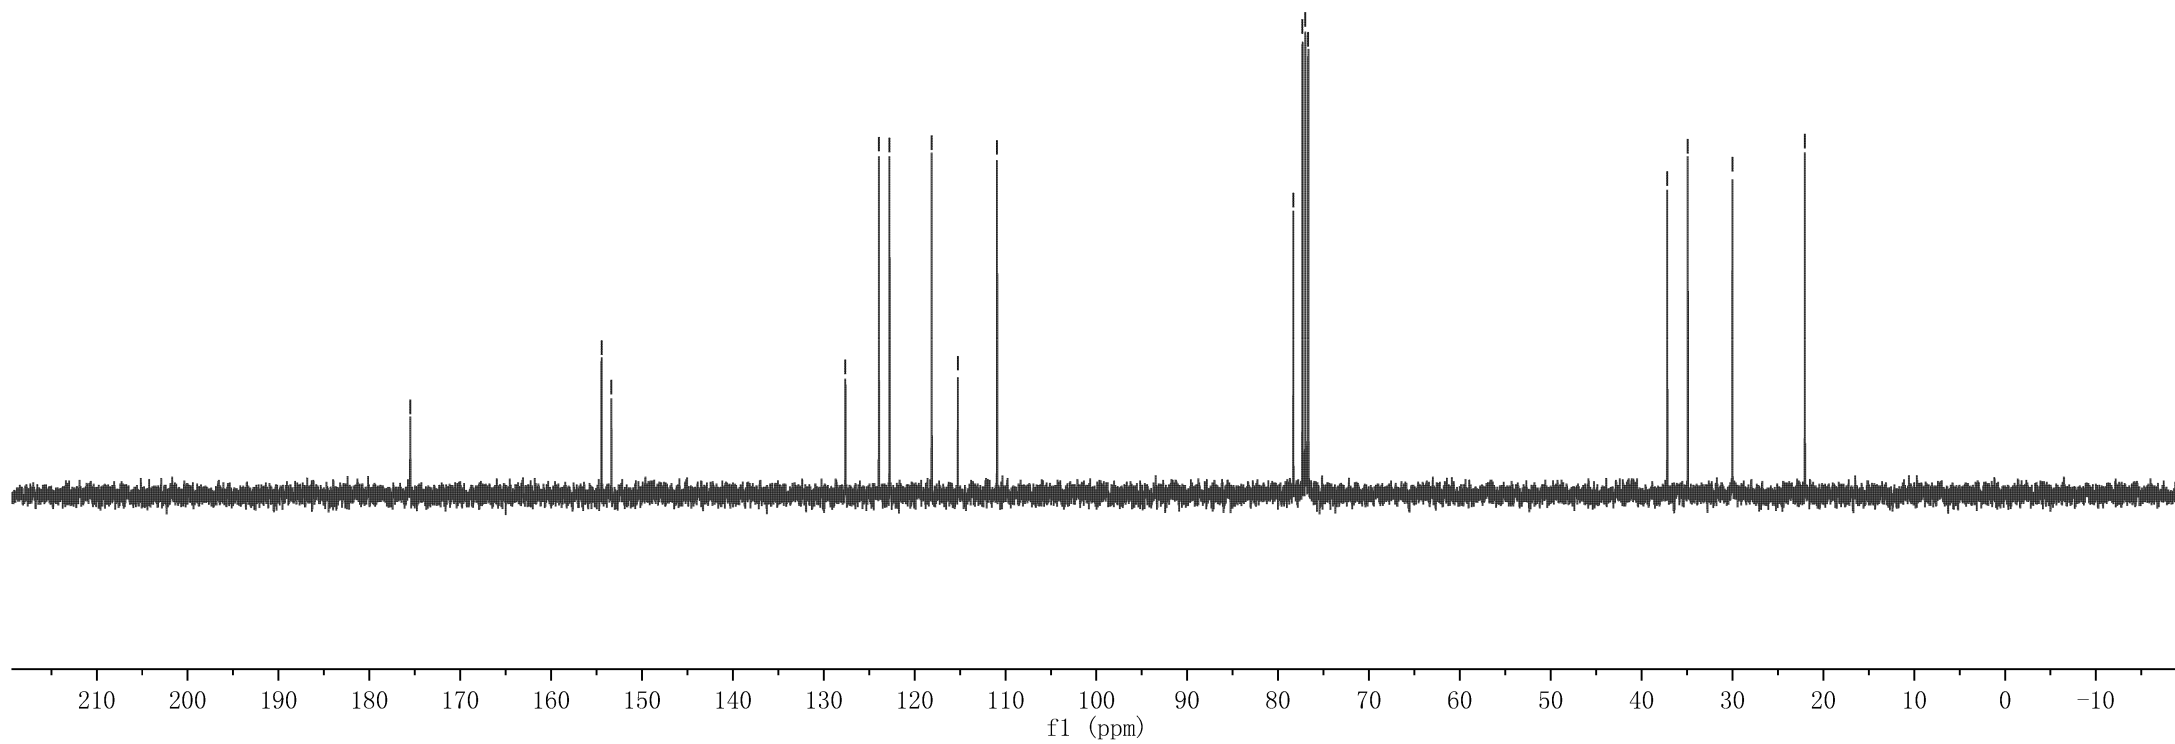

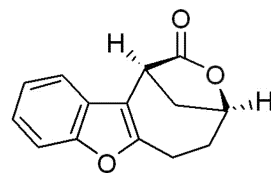

4a

123.92  
122.75  
118.10  
110.92

78.27

37.21  
34.90  
30.04  
22.03

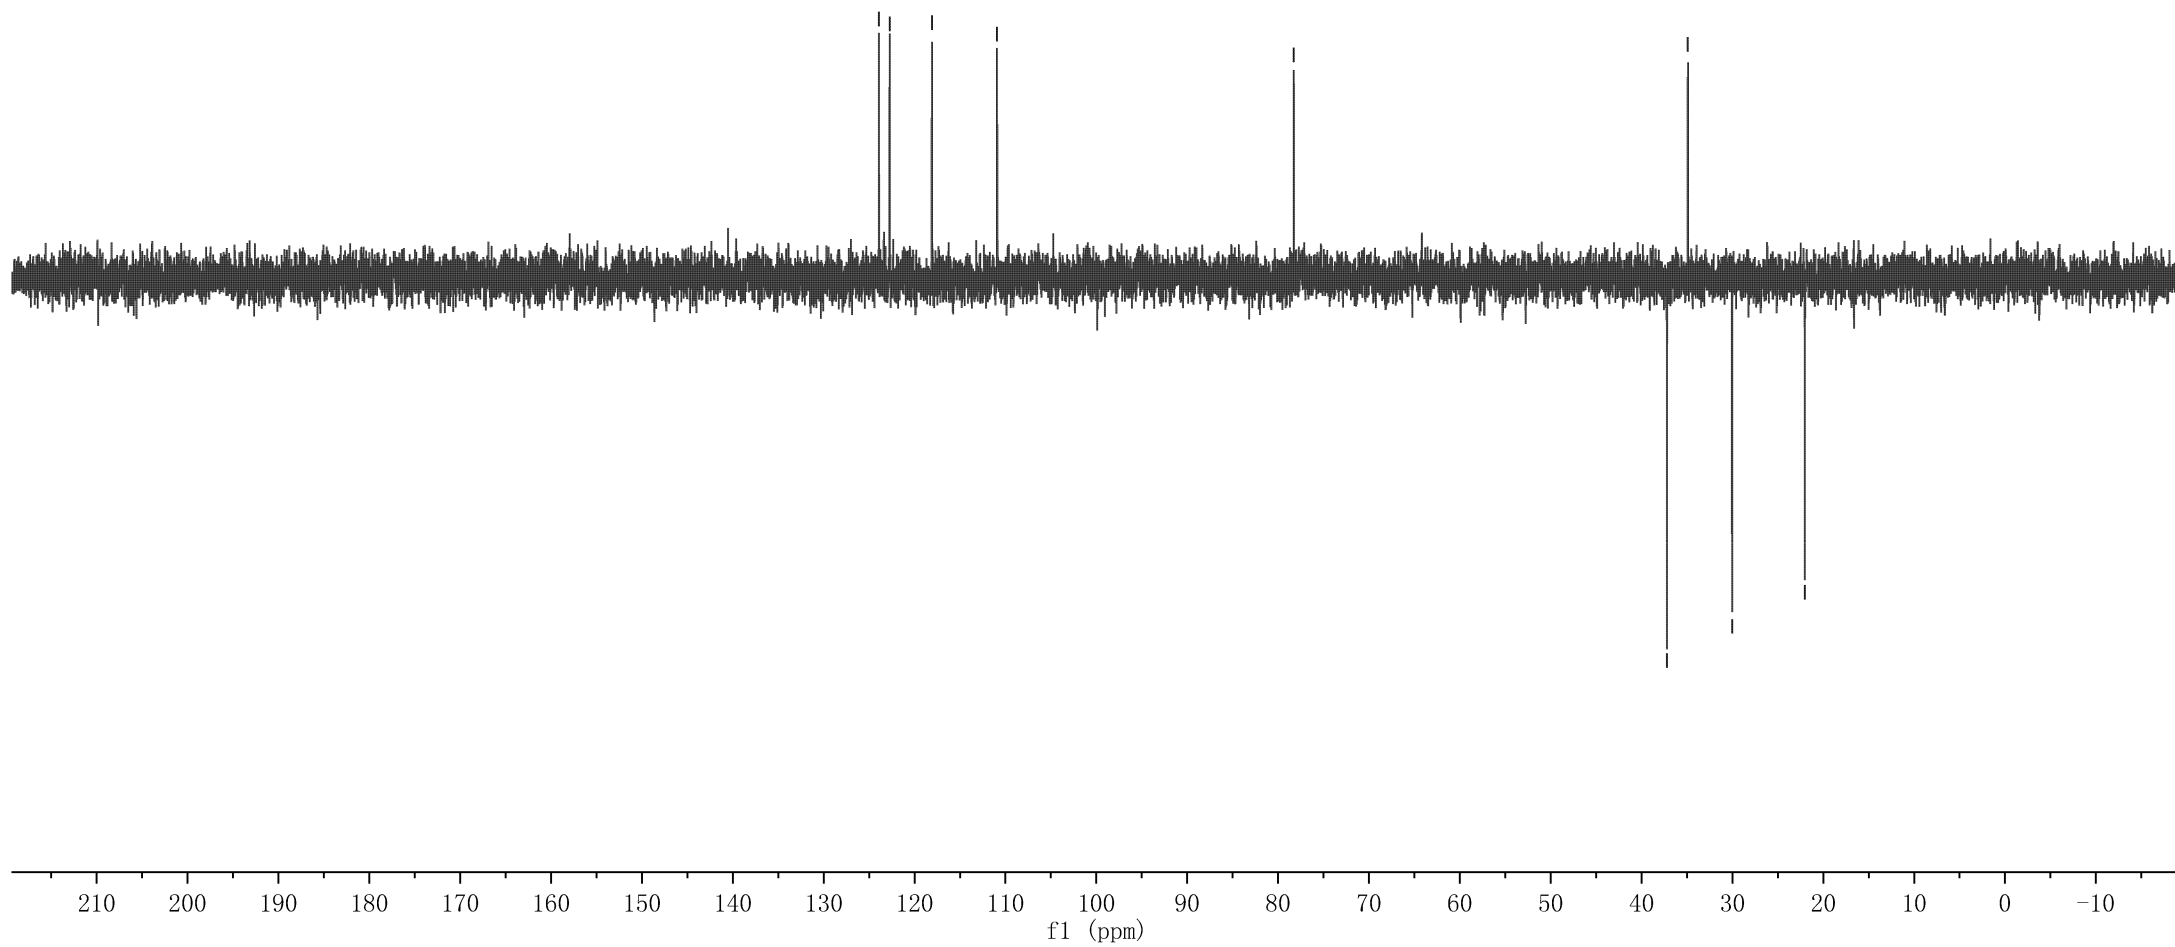

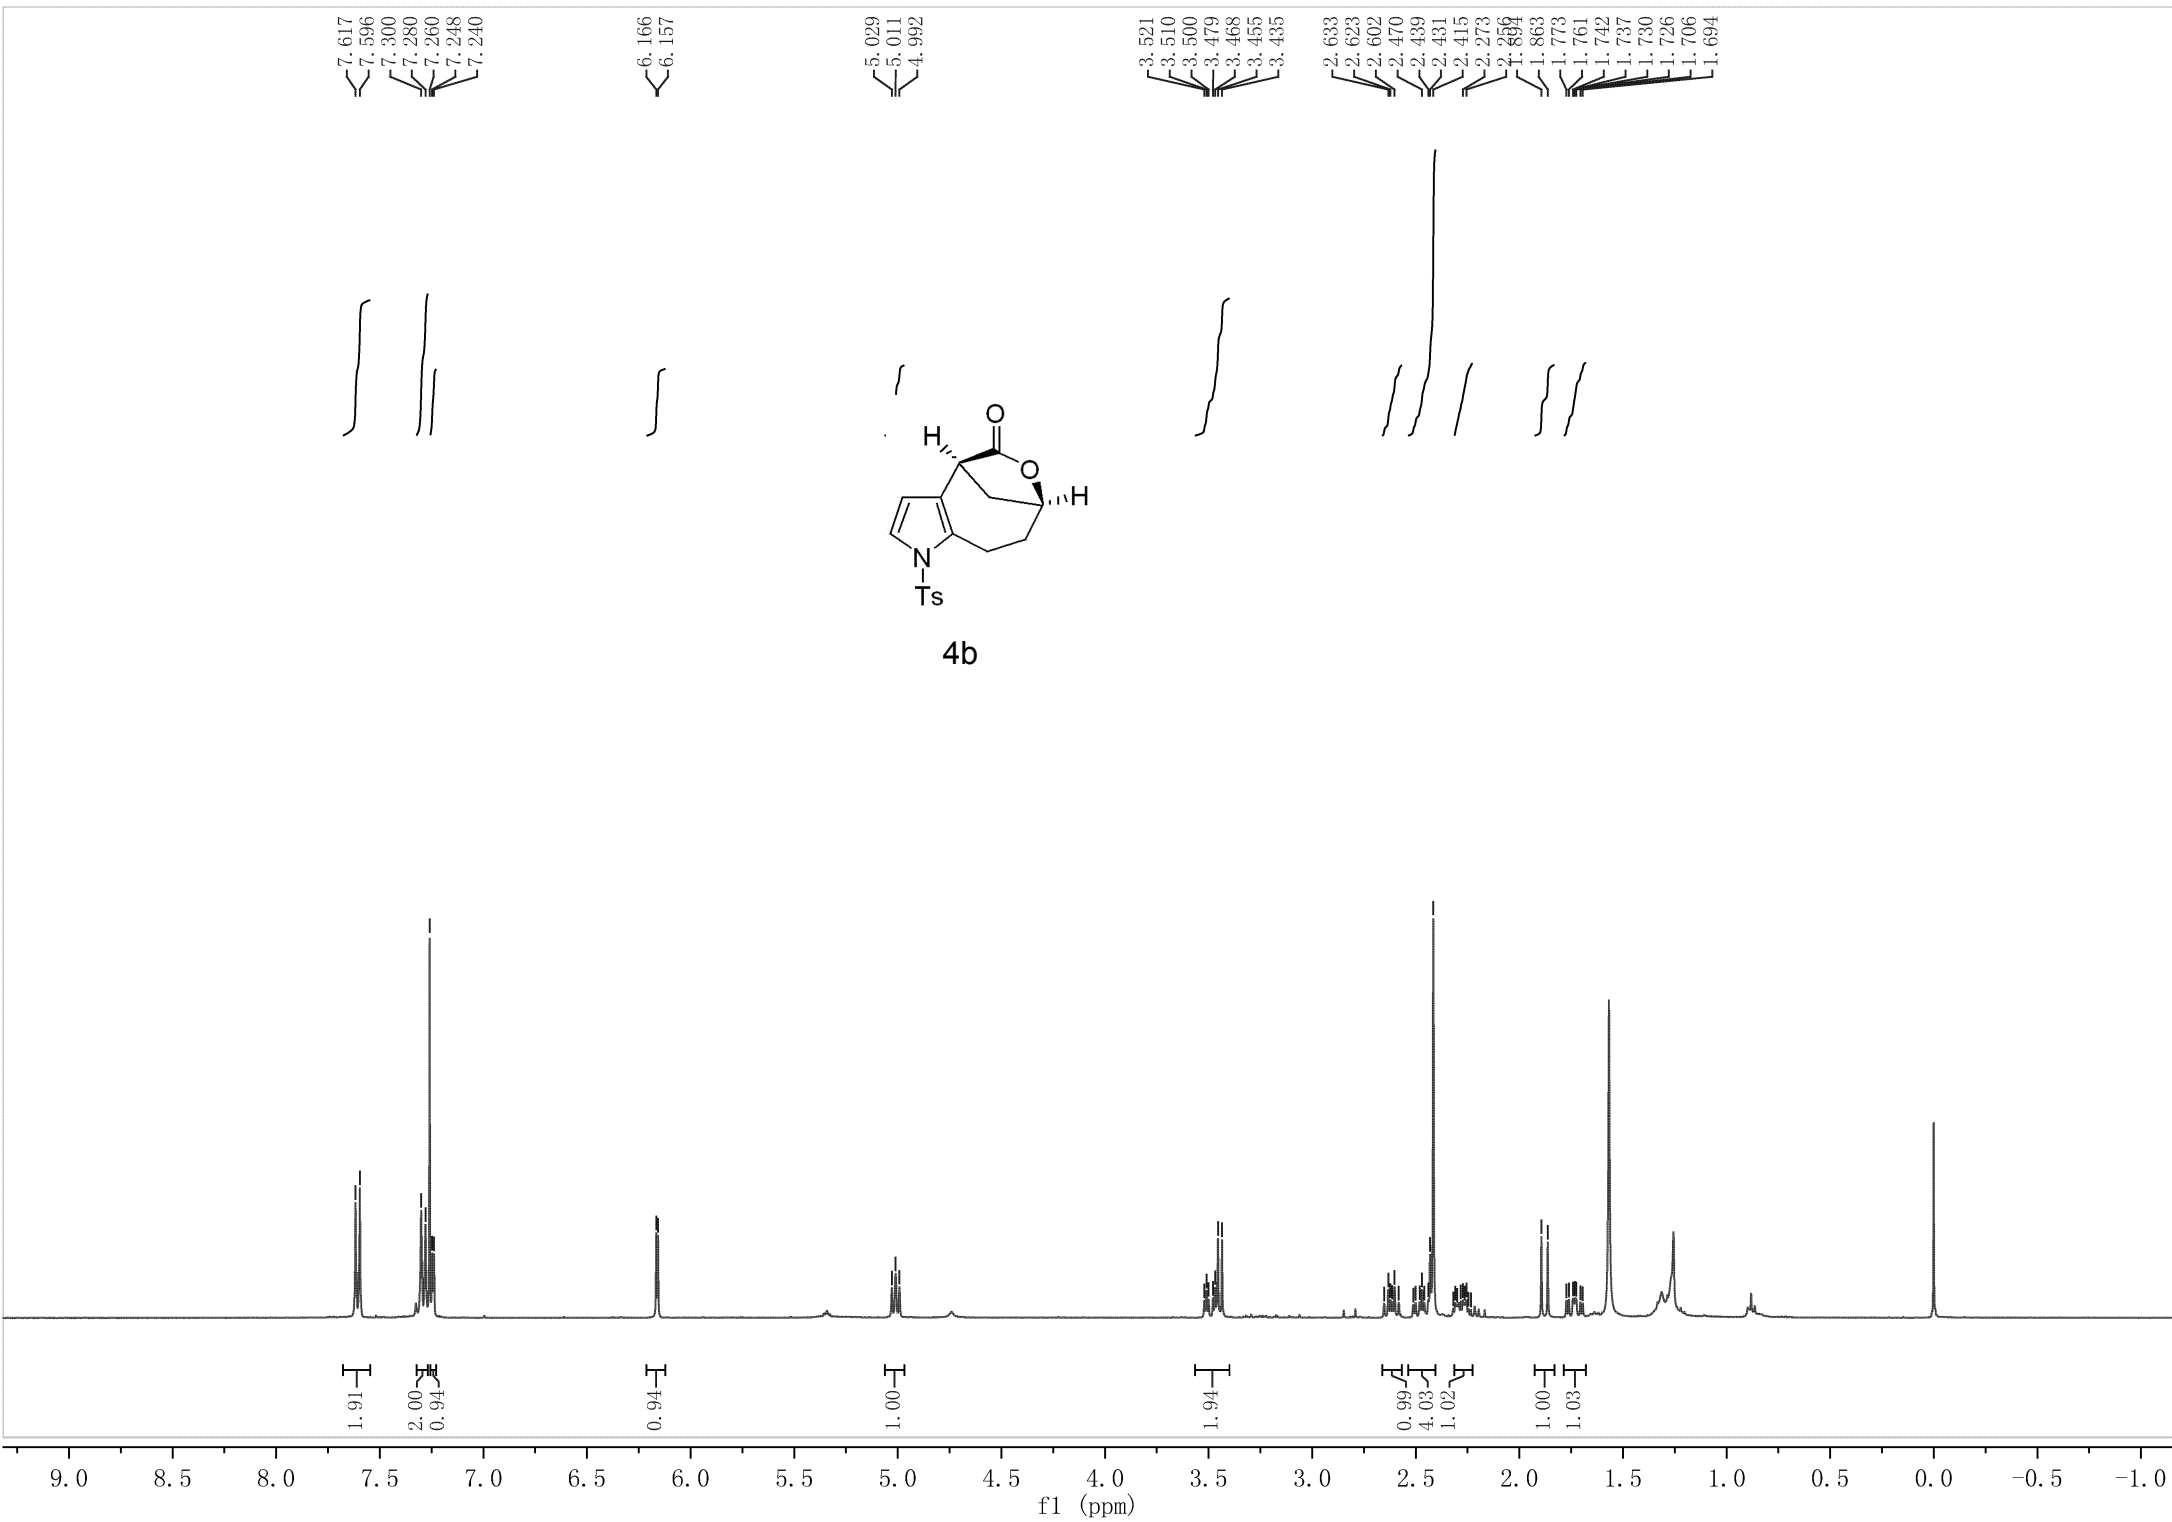



— 175.85  
— 145.29  
— 135.93  
130.16  
129.70  
126.77  
125.79  
121.28  
— 111.93  
78.36  
77.21  
77.00  
76.79  
39.32  
37.38  
31.57  
21.63  
18.92

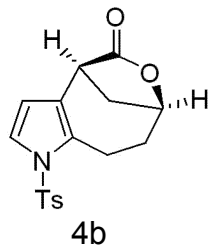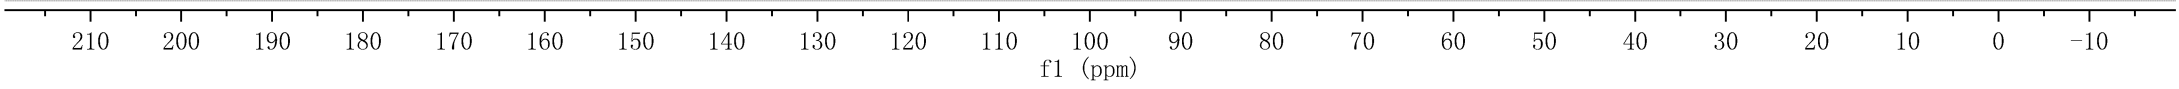

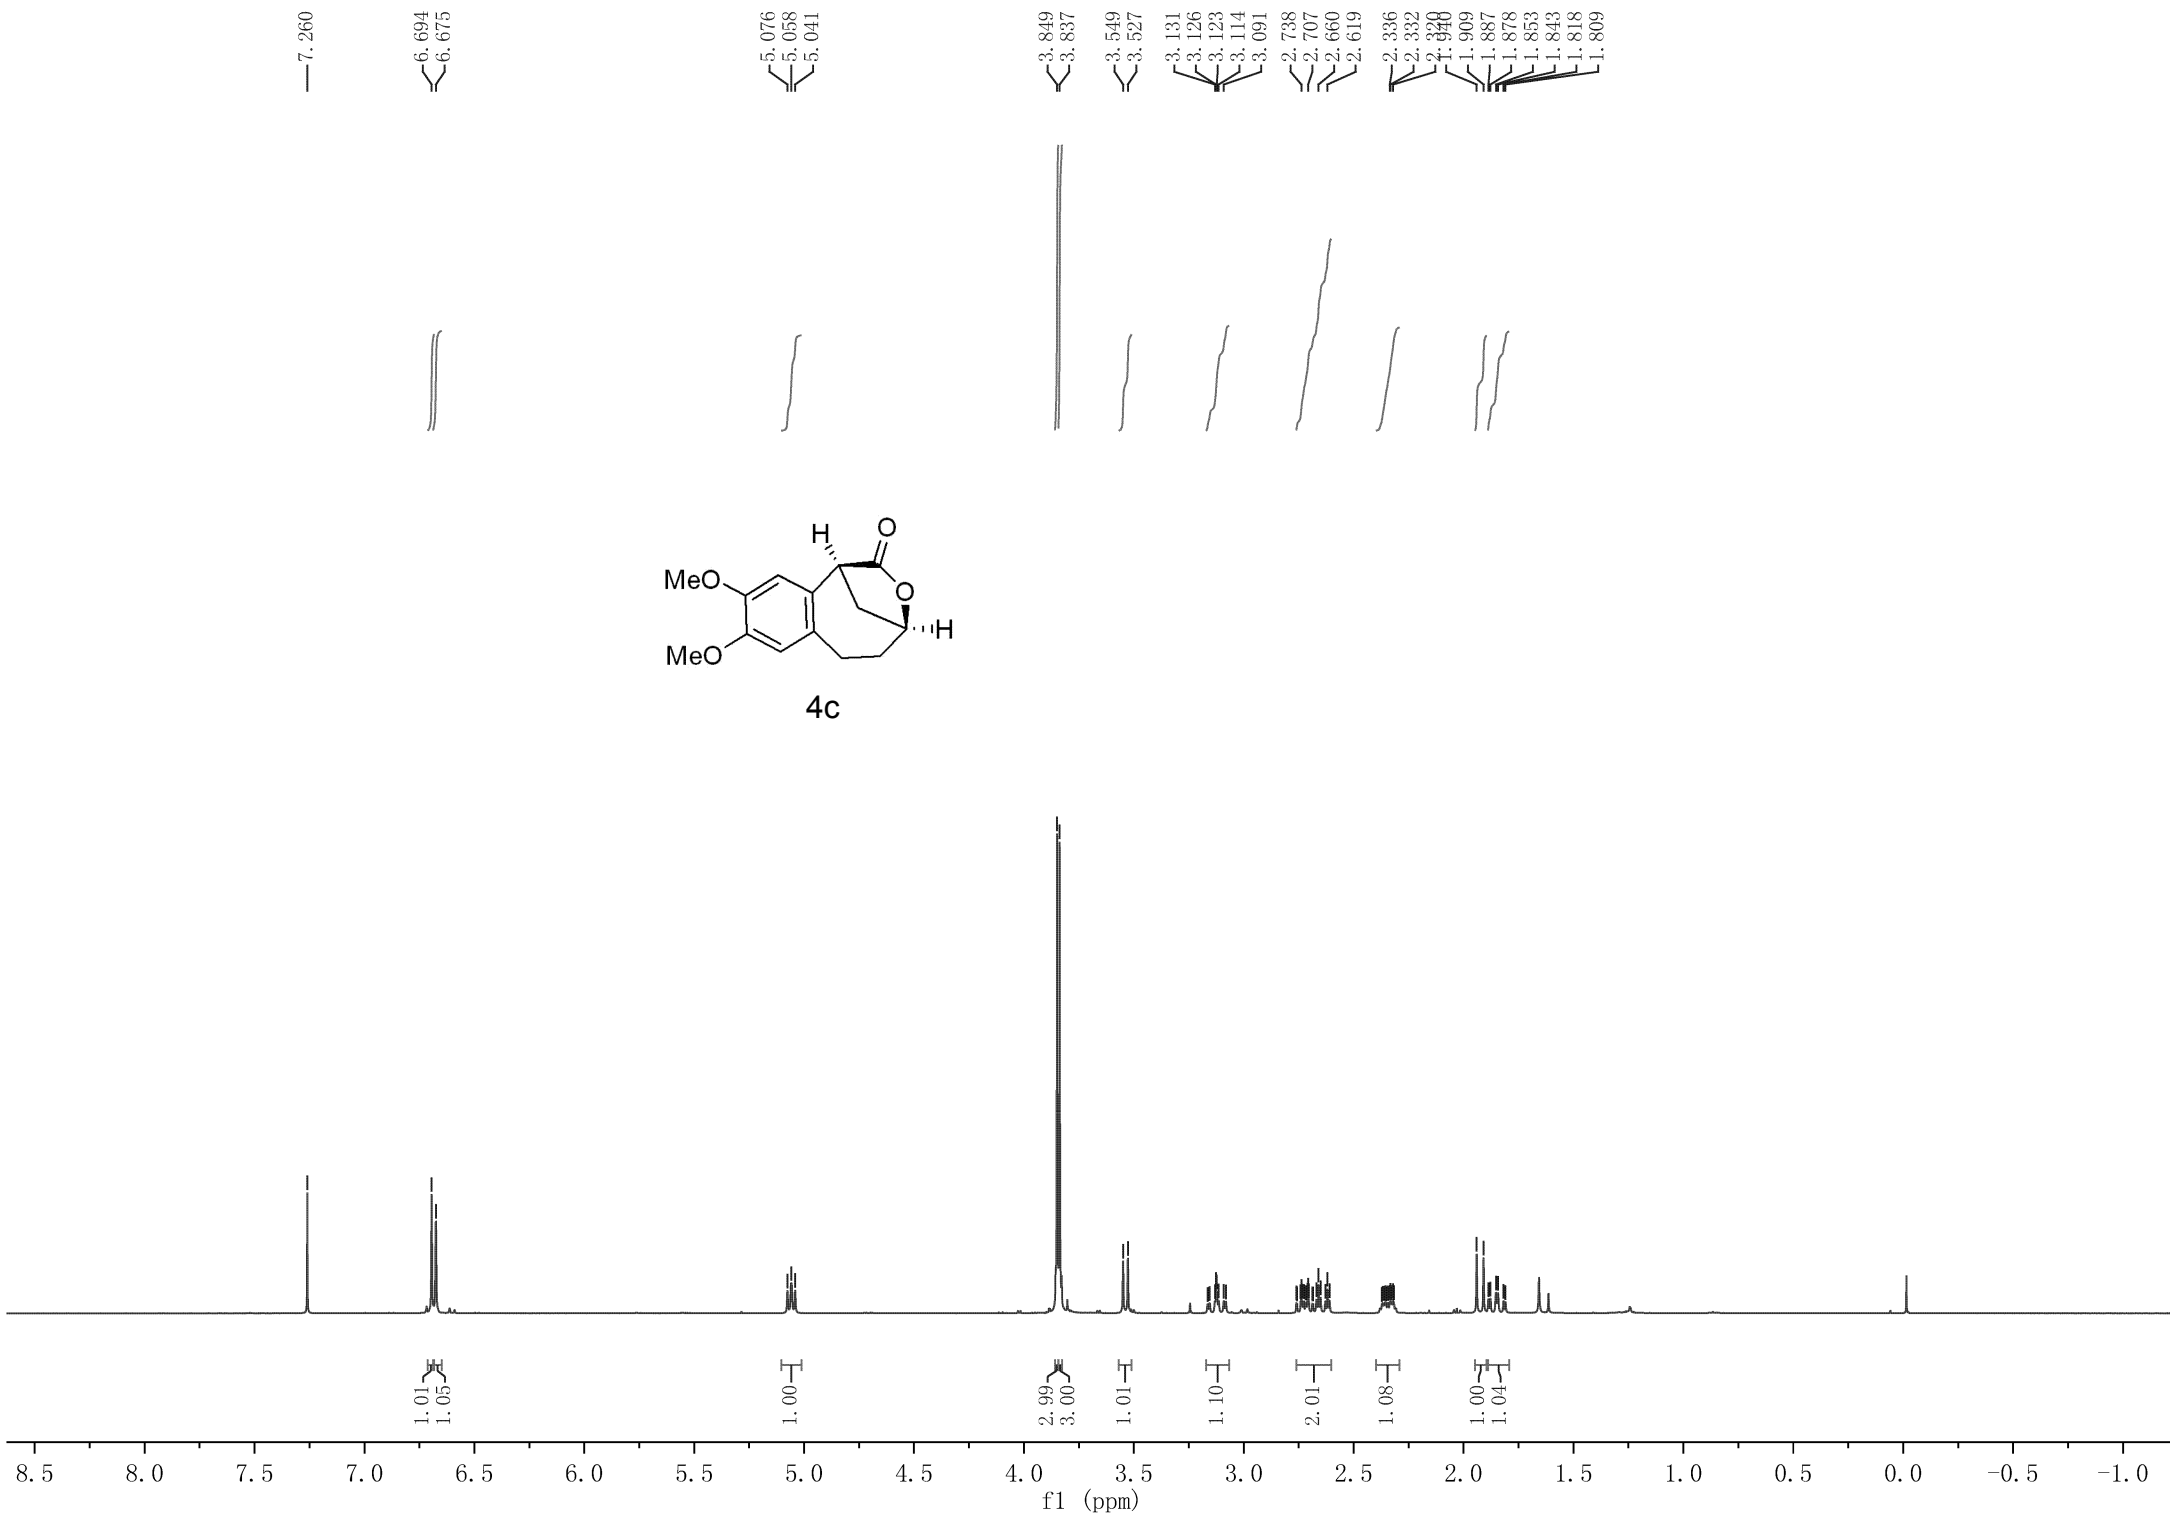

— 177.29

147.54  
147.22

131.30  
131.10

114.67  
113.52

78.69  
77.32  
77.00  
76.68

55.95  
55.92

— 46.92

— 38.19

— 33.36

— 29.10

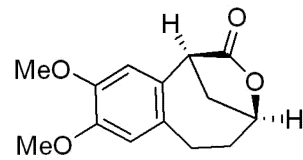

4c

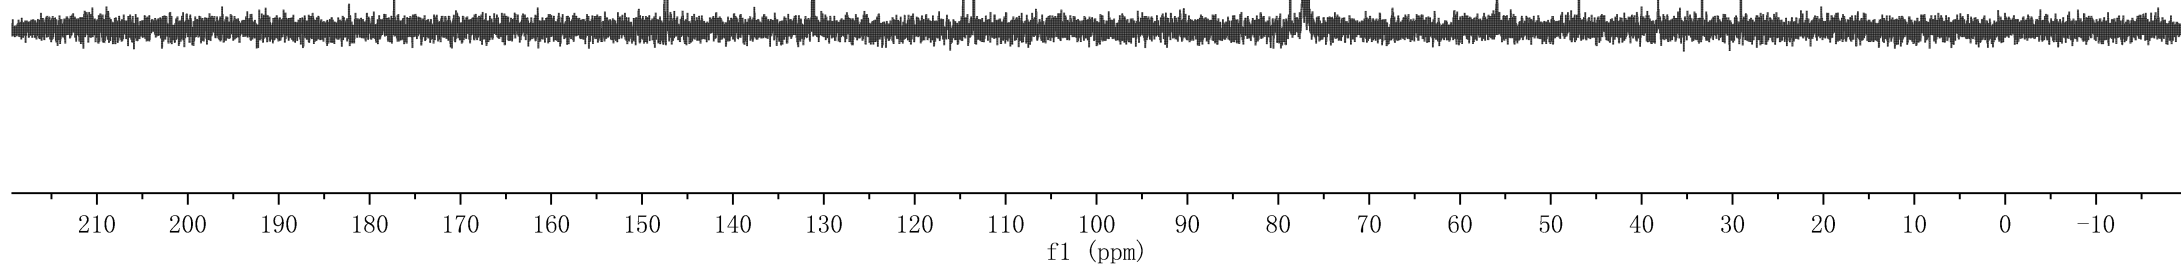

114.68  
113.54

78.65

55.95  
55.92

46.92

38.19

33.37

29.10

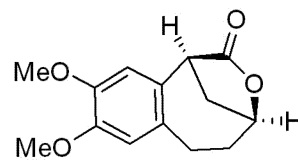

4c

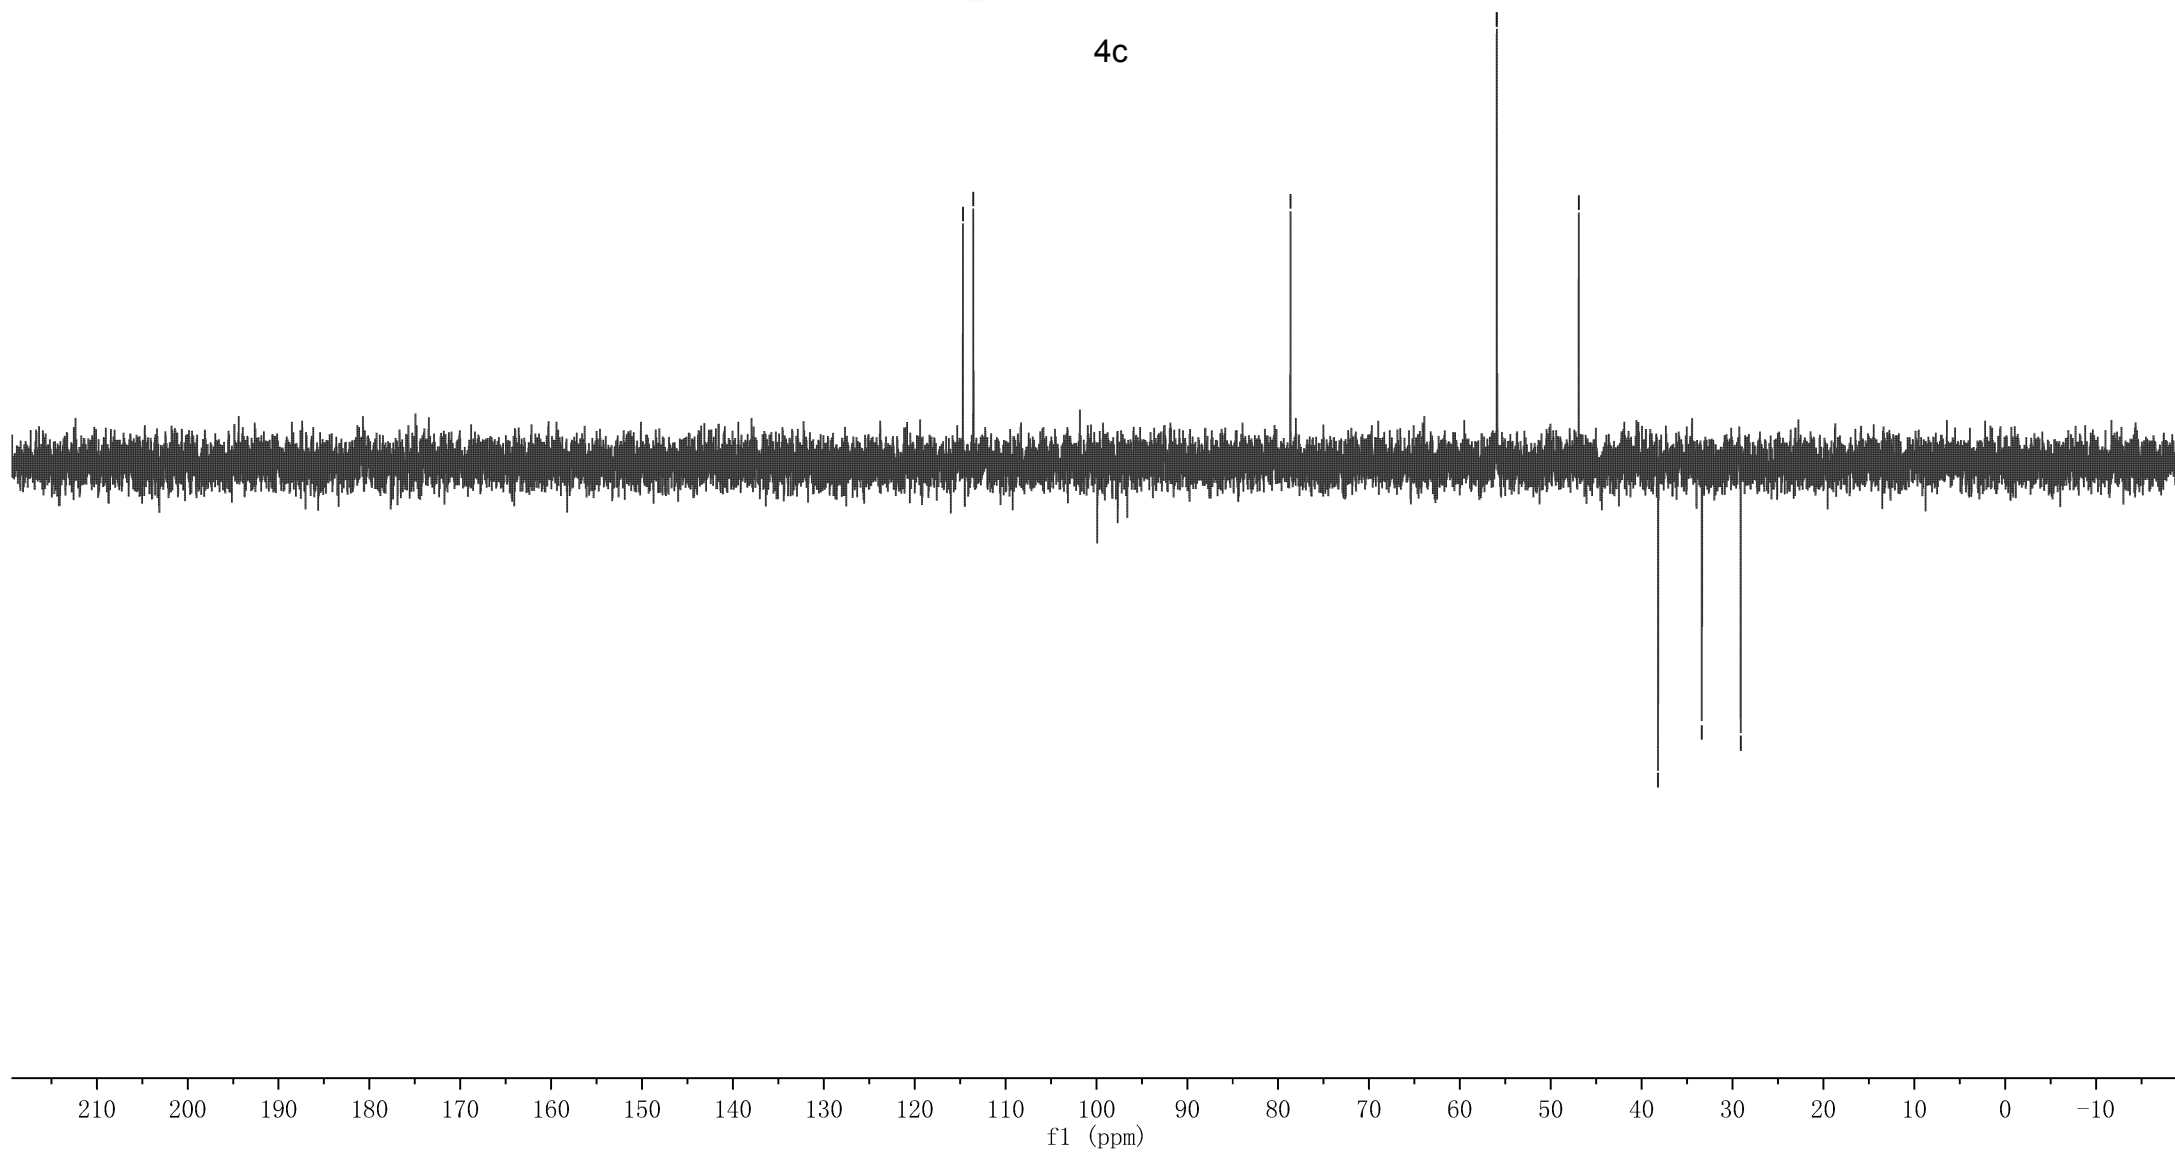

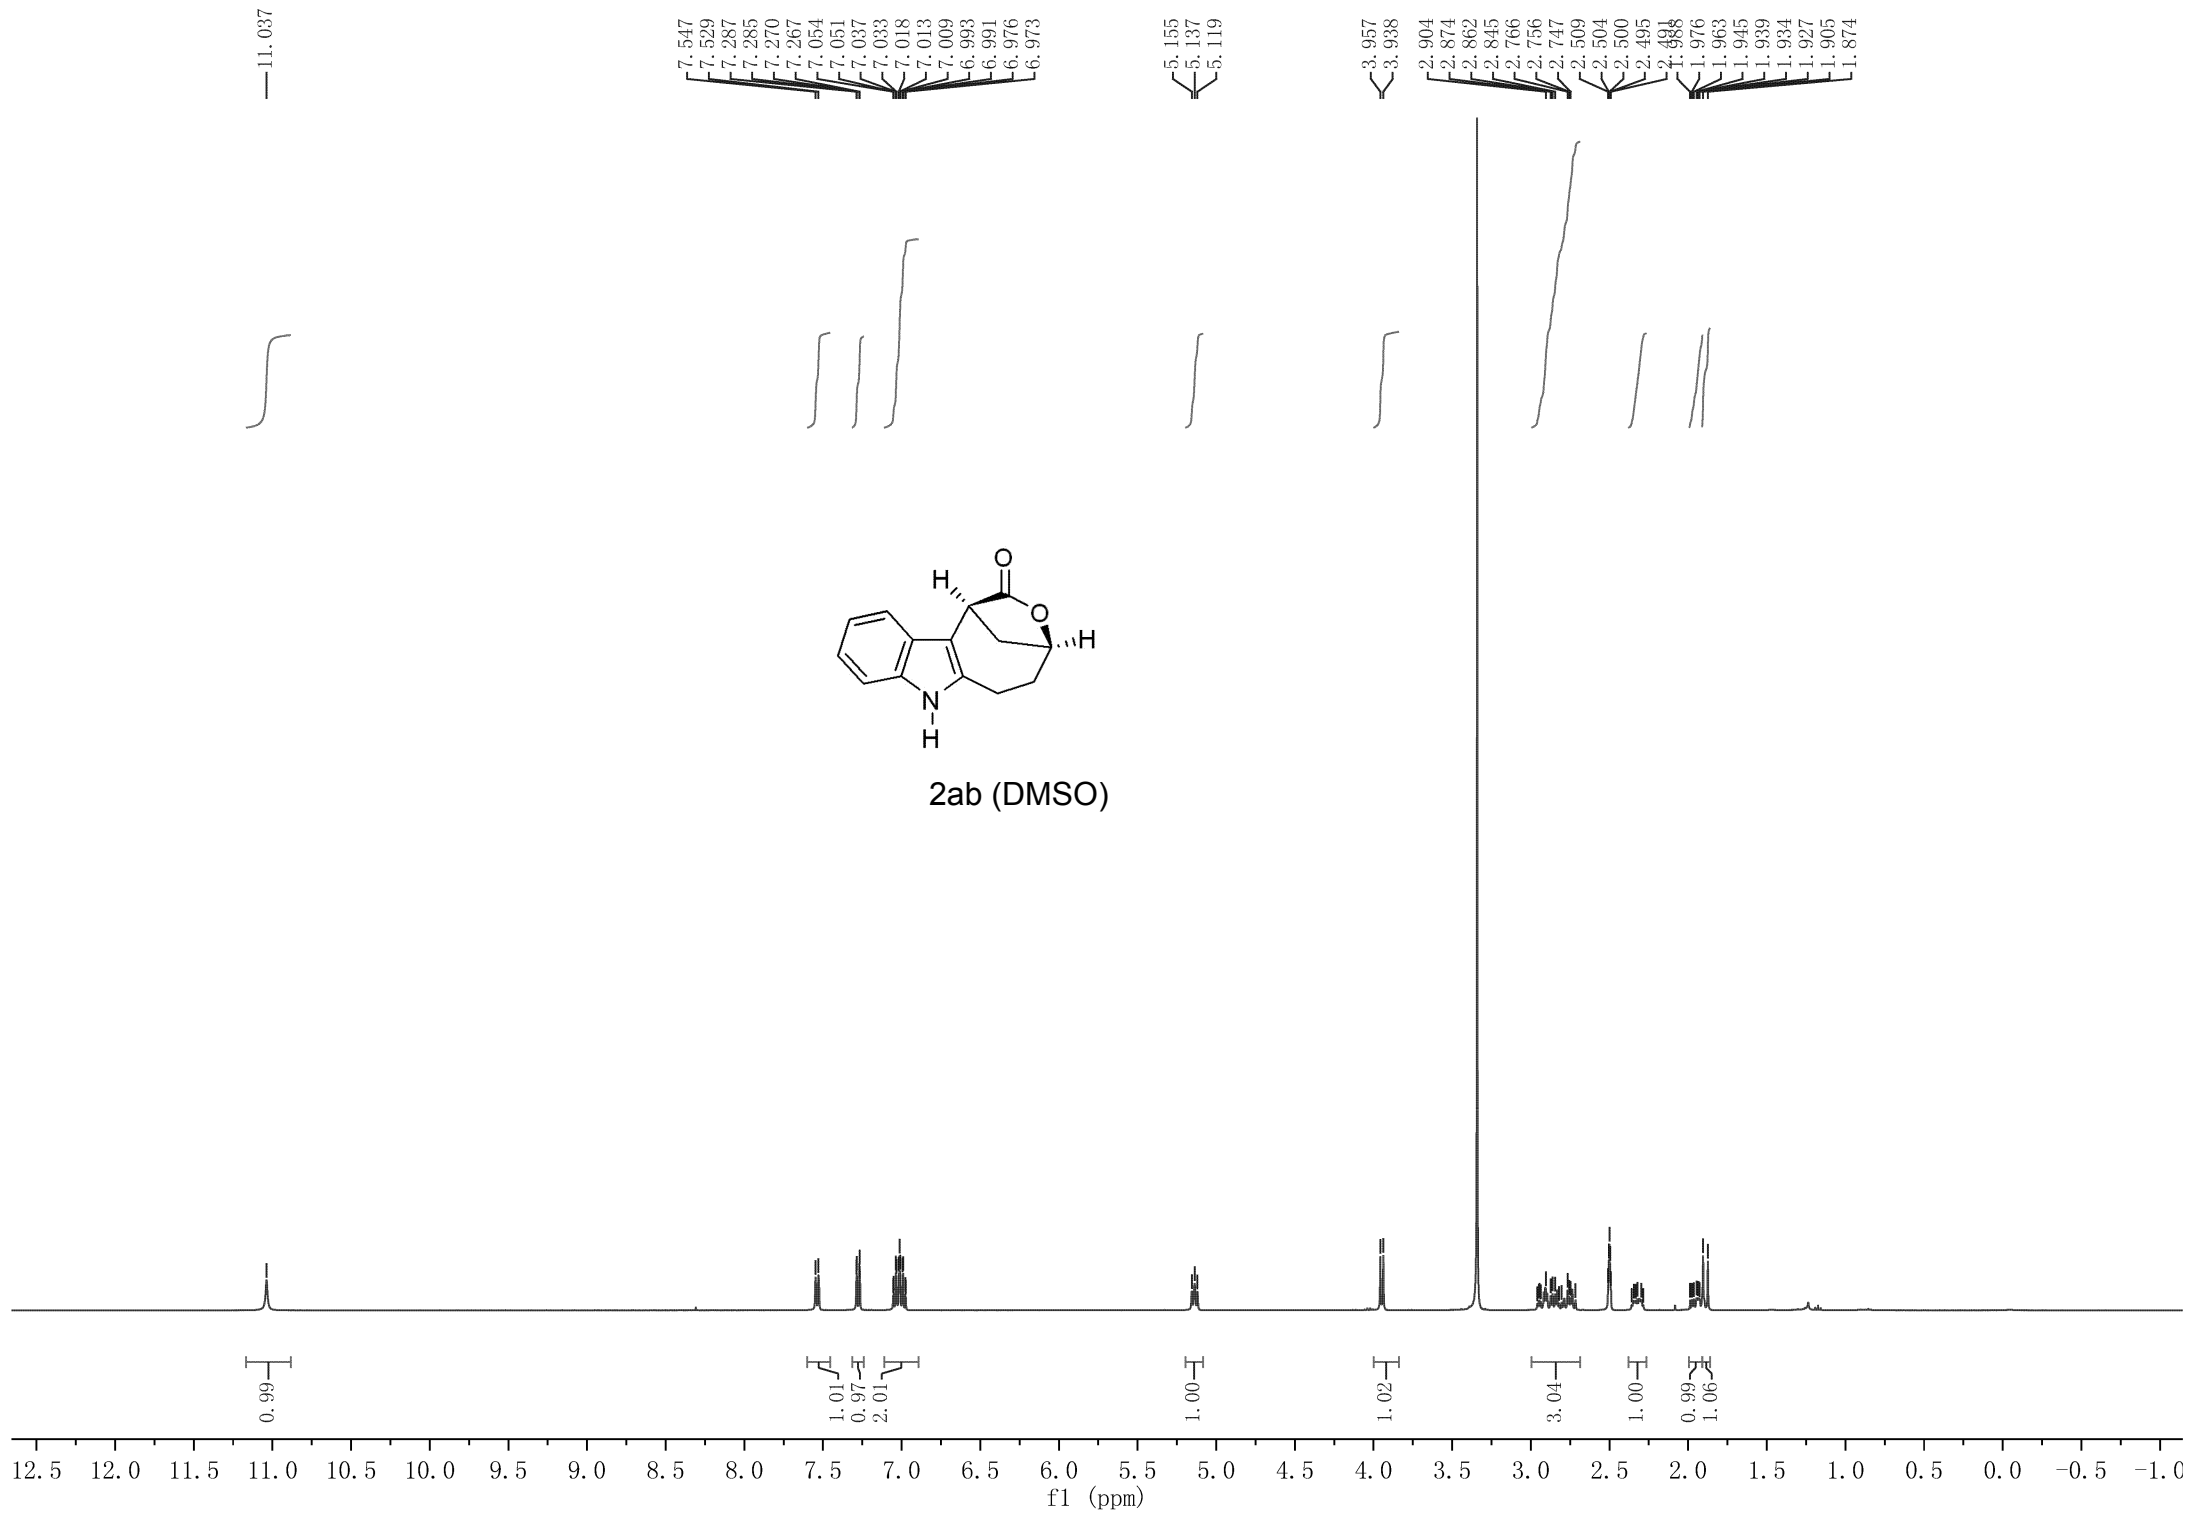

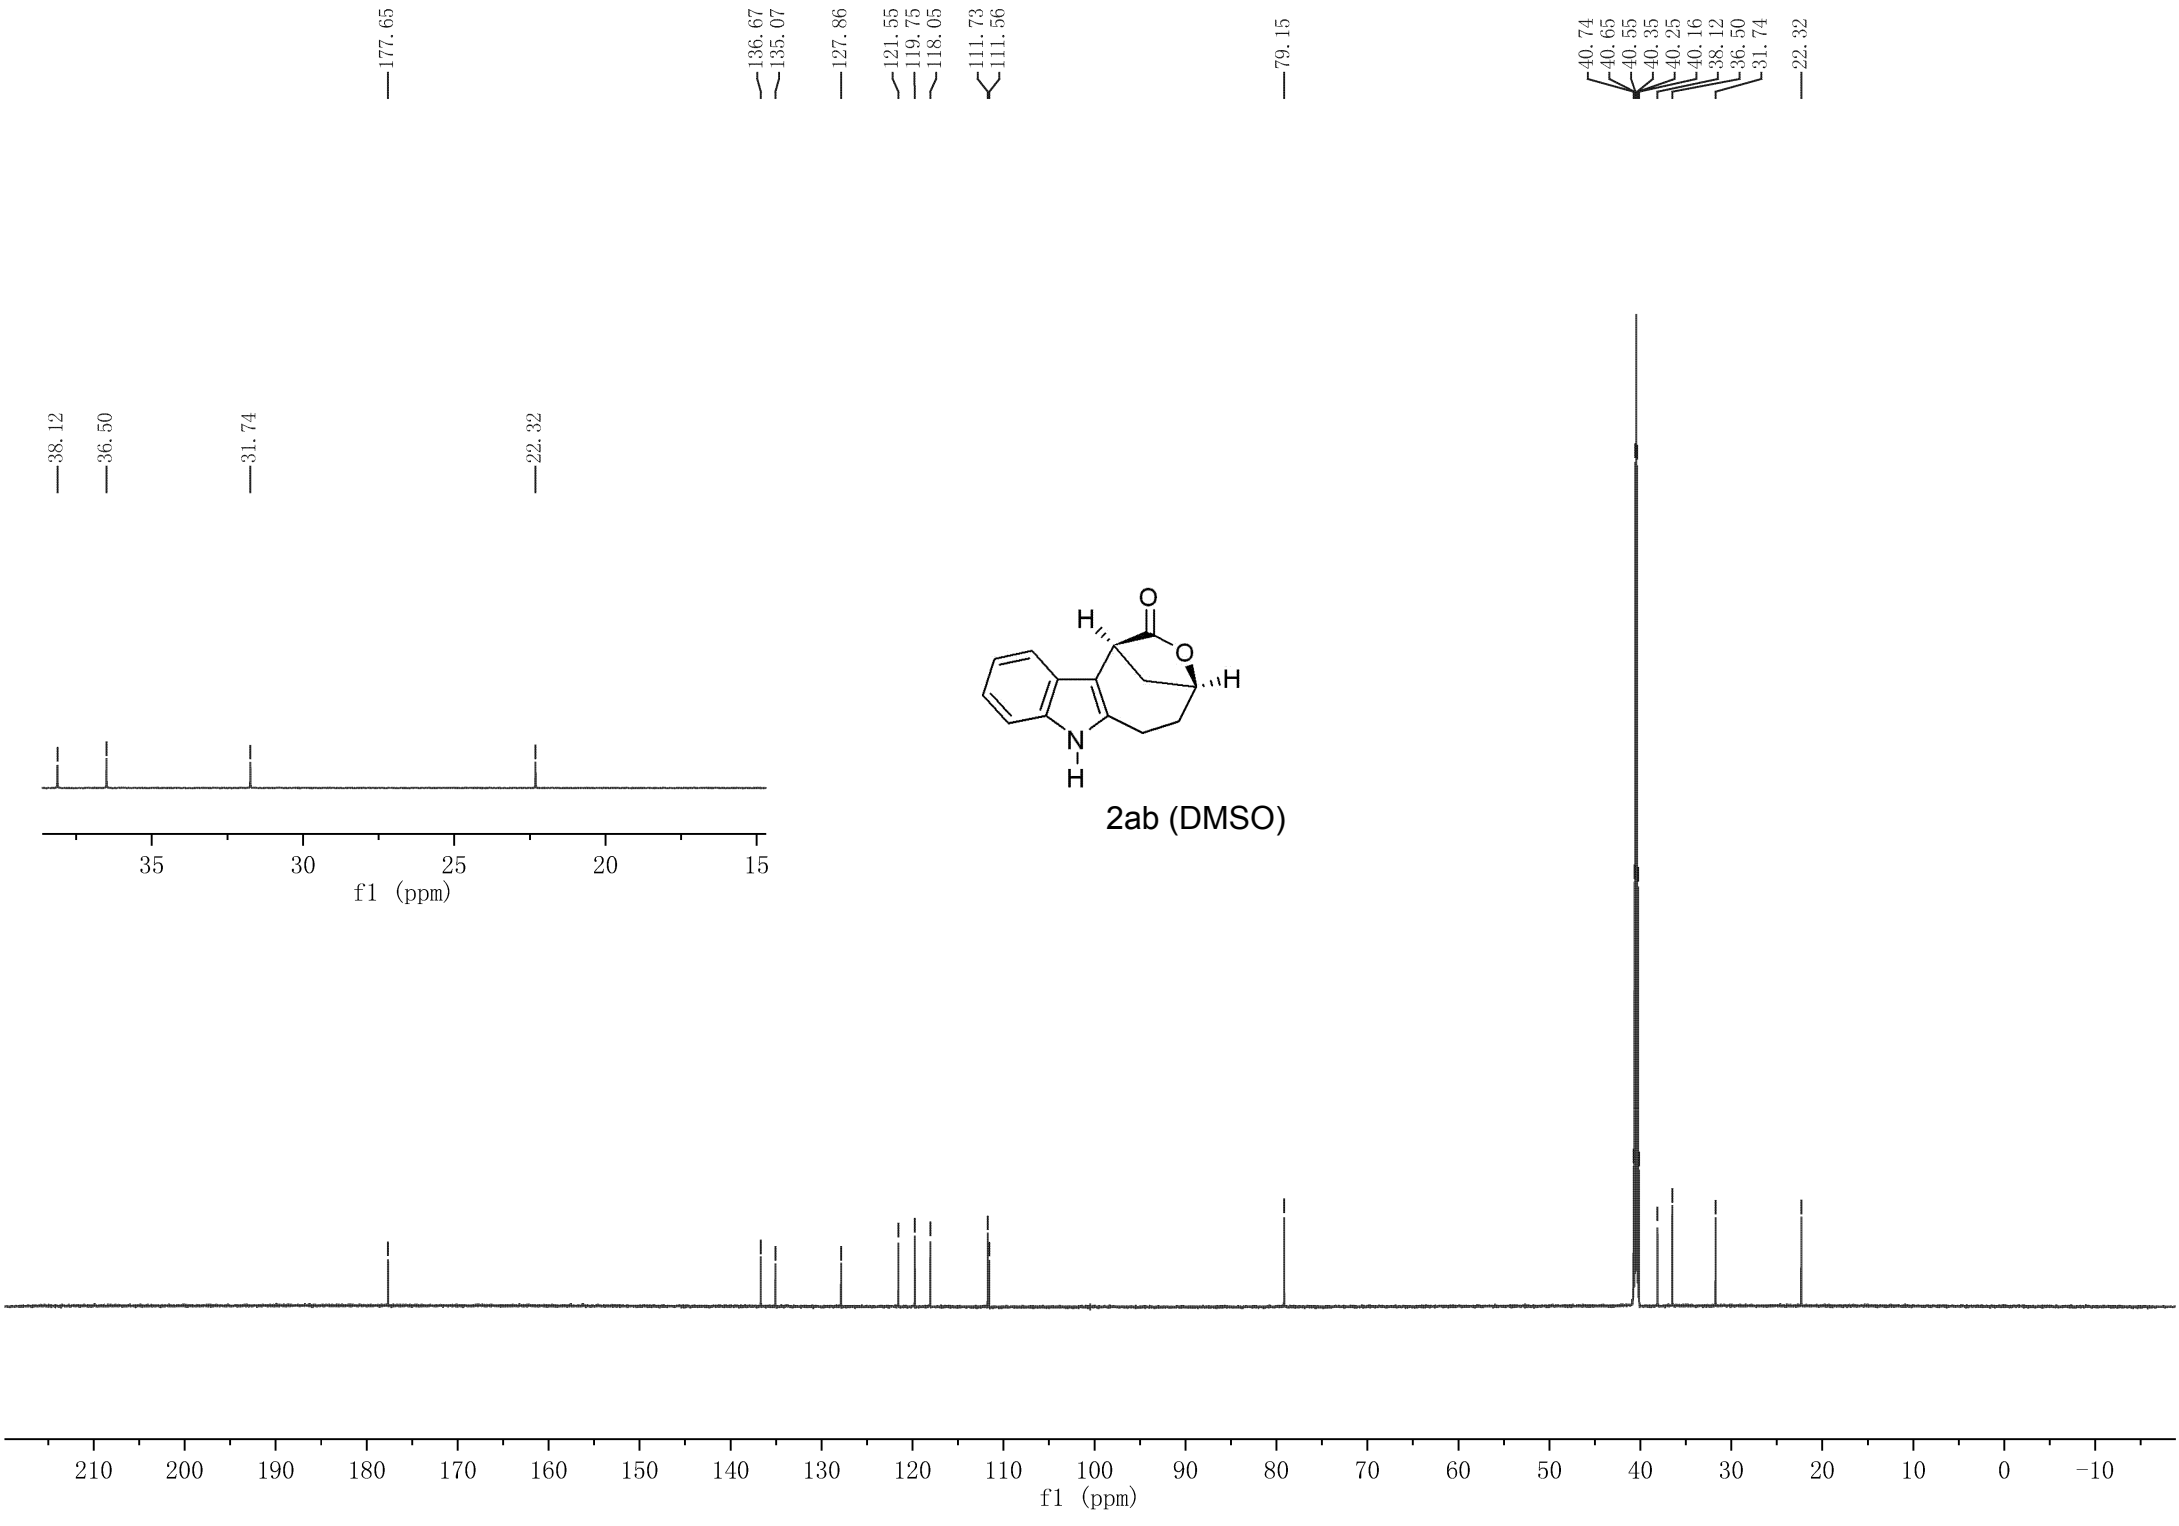

8.257  
8.254  
8.239  
8.236  
7.549  
7.529  
7.452  
7.434  
7.430  
7.319  
7.316  
7.301  
7.298  
7.282  
7.279  
7.276  
7.260  
7.242  
7.239  
7.173  
7.153

5.244  
5.237  
4.888  
4.870  
4.851

3.650  
3.639  
3.627  
3.607  
3.596  
3.585  
3.471  
3.455

3.116  
3.004  
2.989  
2.976

2.658  
2.646  
2.628

2.333  
2.181  
2.166  
2.146

1.686  
1.656  
1.578  
1.568  
1.550  
1.541  
1.533  
1.516  
1.504

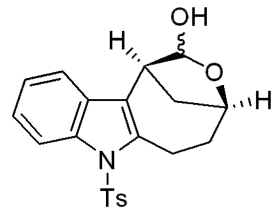

2ac

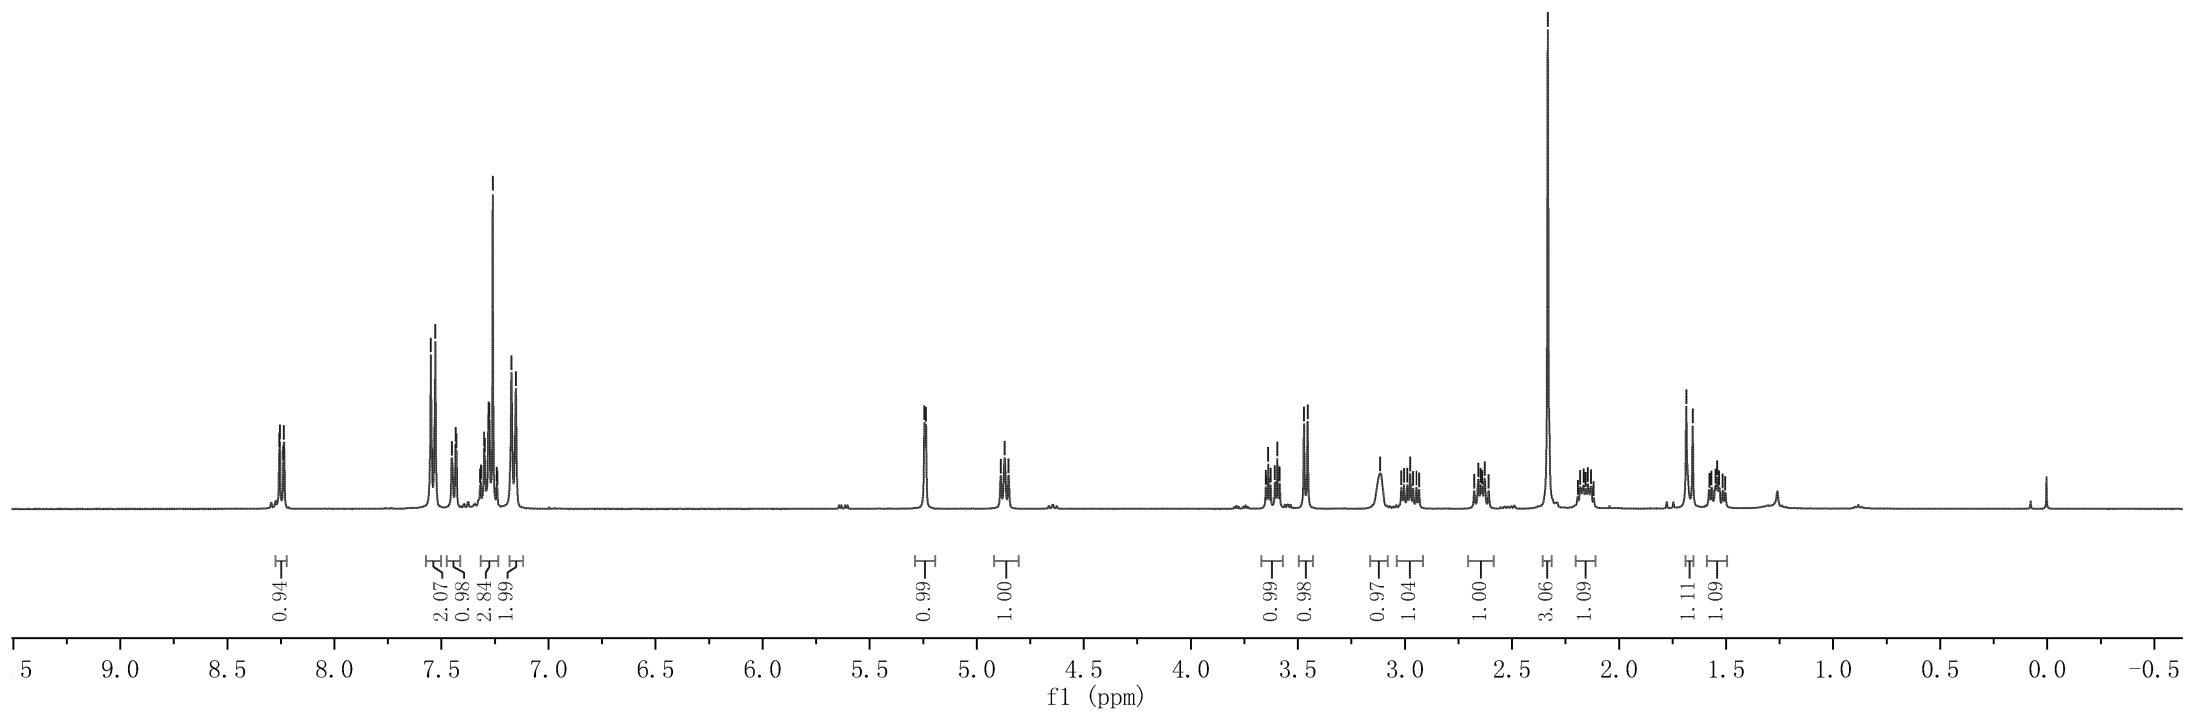

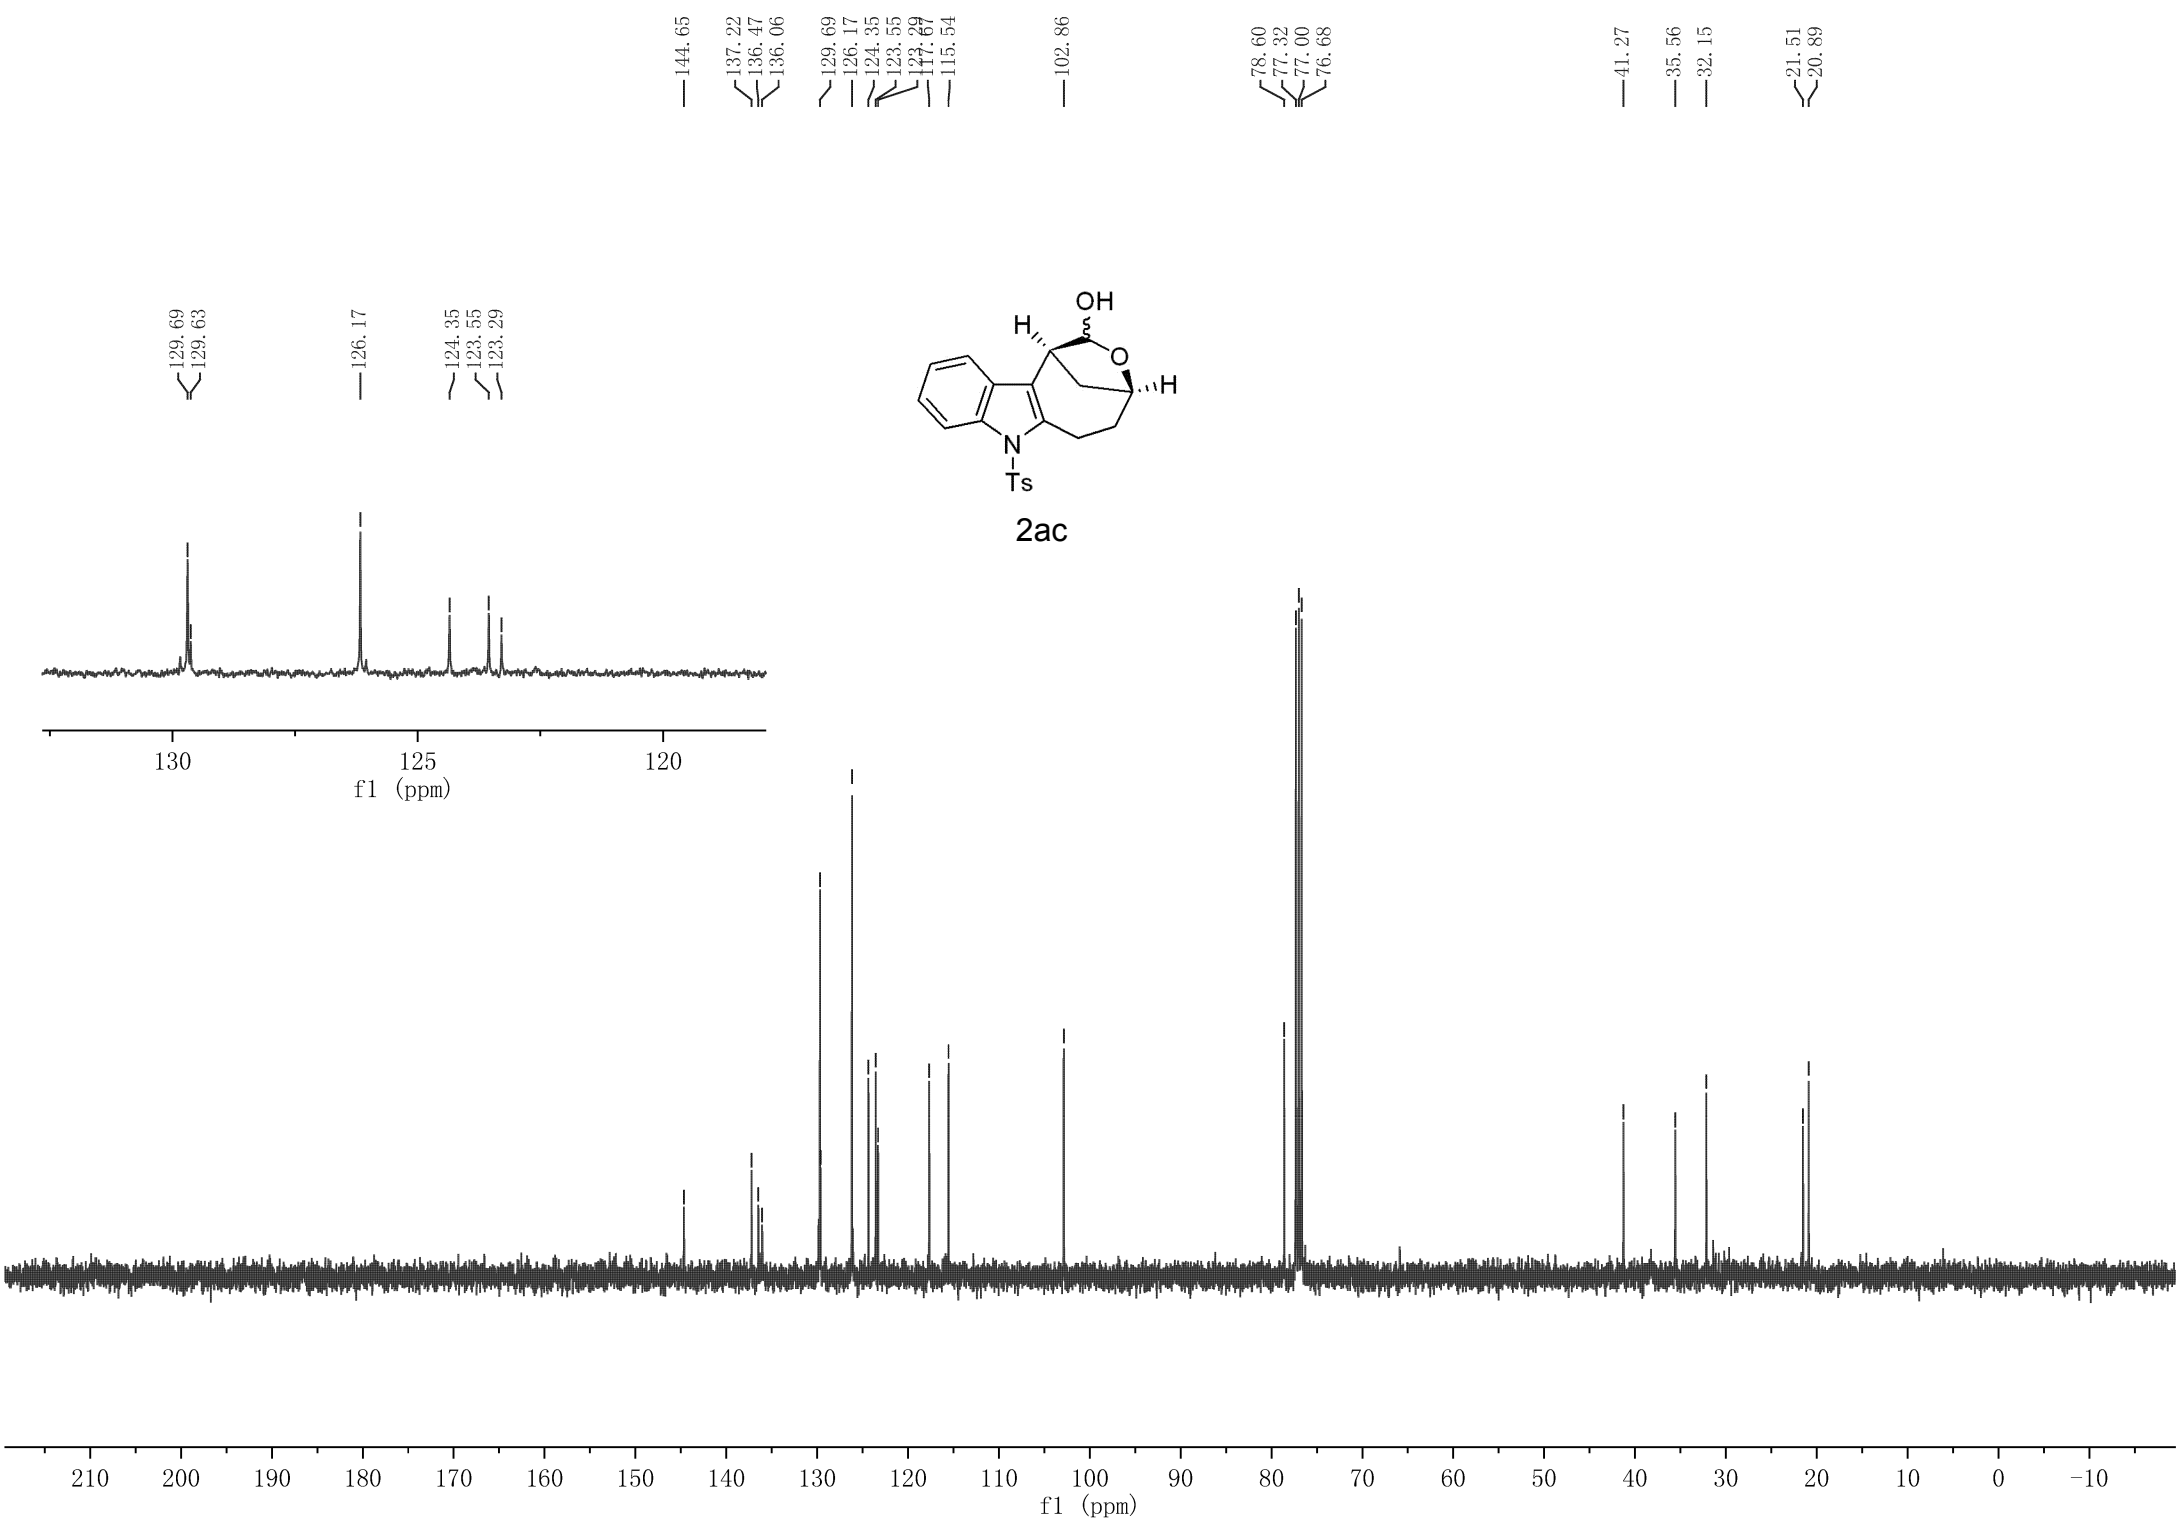



129.65  
126.15  
124.32  
123.52

117.61  
115.53

102.85

78.60

41.27

35.53

32.11

21.48  
20.85

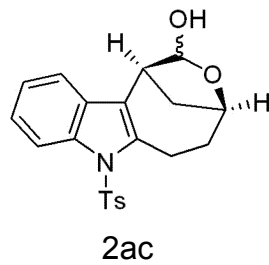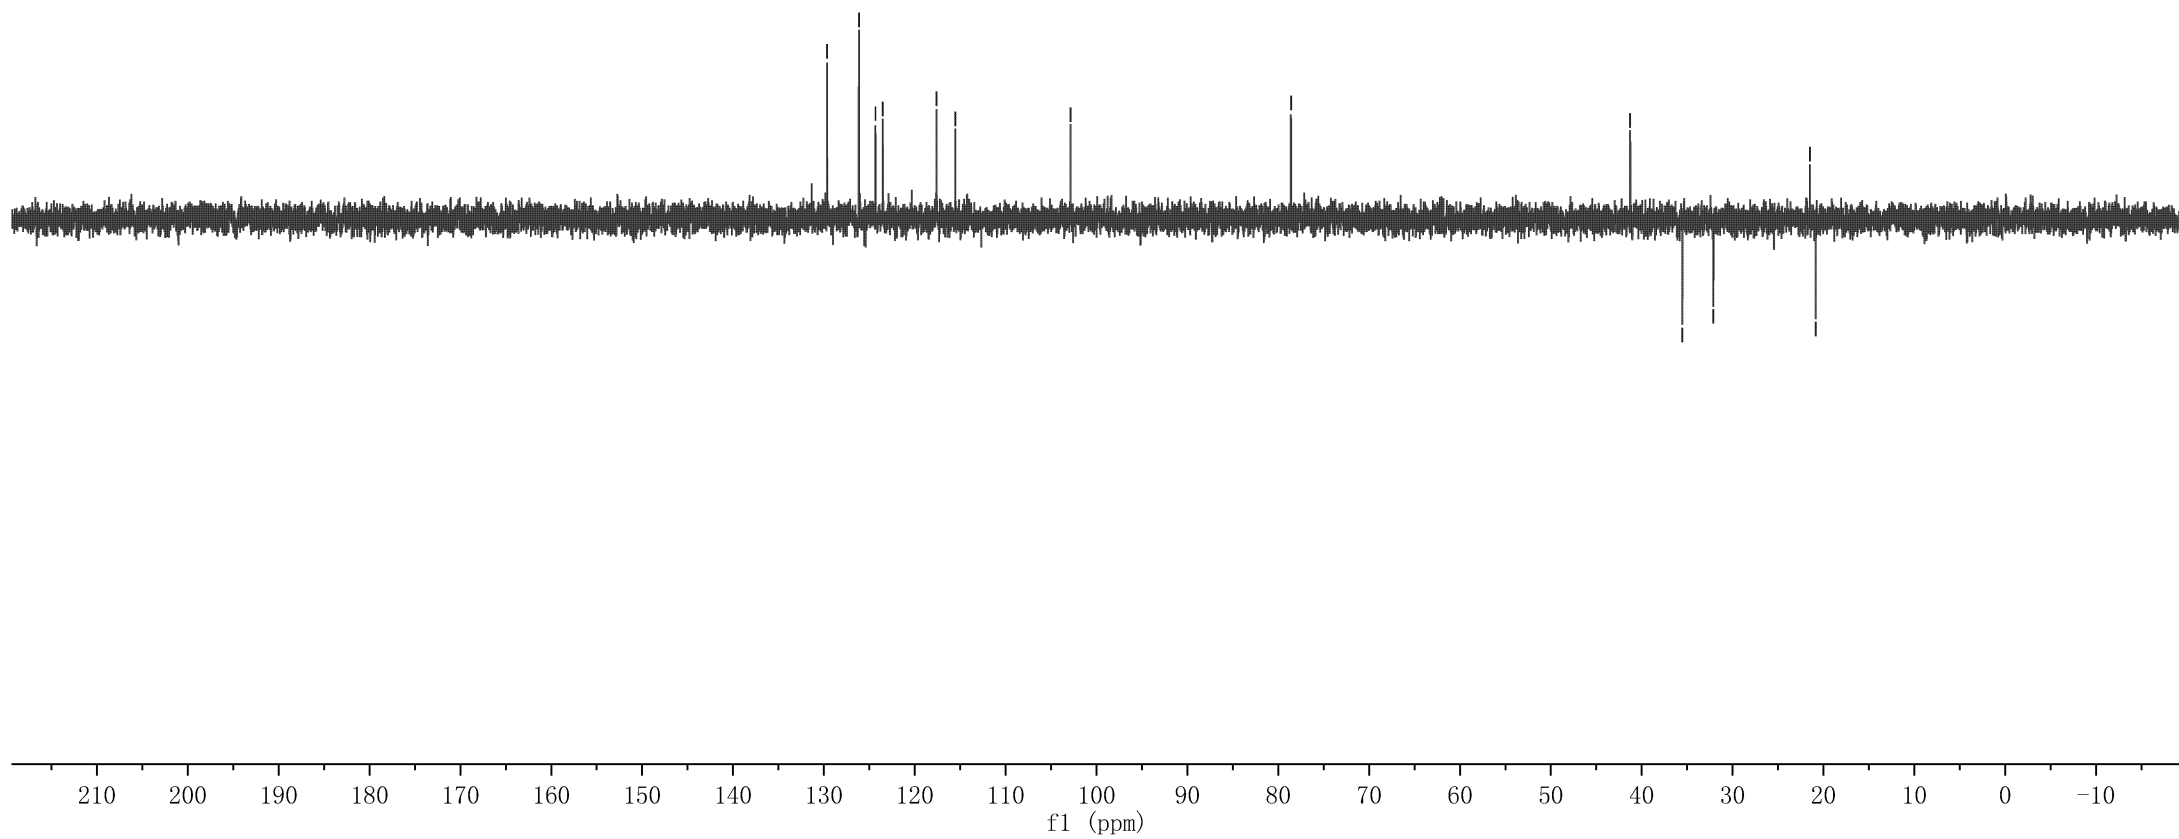

8.255  
8.251  
8.237  
8.233  
7.546  
7.525  
7.400  
7.383  
7.379  
7.292  
7.289  
7.274  
7.271  
7.256  
7.251  
7.246  
7.238  
7.234  
7.220  
7.216  
7.154  
7.133

4.712  
4.693  
4.675  
4.132  
4.118  
4.113  
4.098  
3.874  
3.855  
3.672  
3.630  
3.573  
3.558  
3.087  
3.076  
3.059  
3.047  
3.034  
3.017  
2.312  
2.298  
2.287  
2.280  
2.268  
2.142  
2.142  
1.713  
1.538  
1.528  
1.508  
1.500  
1.493  
1.474  
1.463

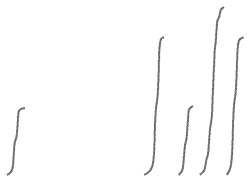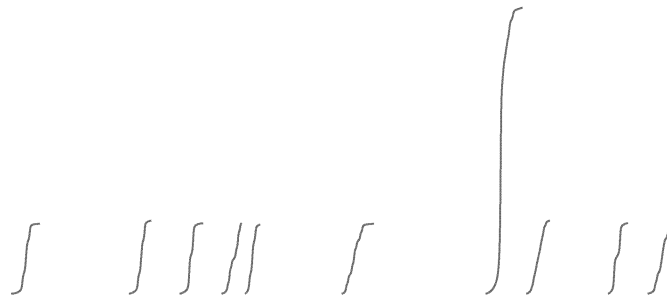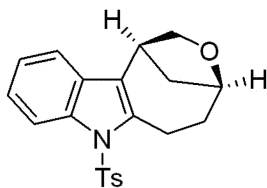

2ad

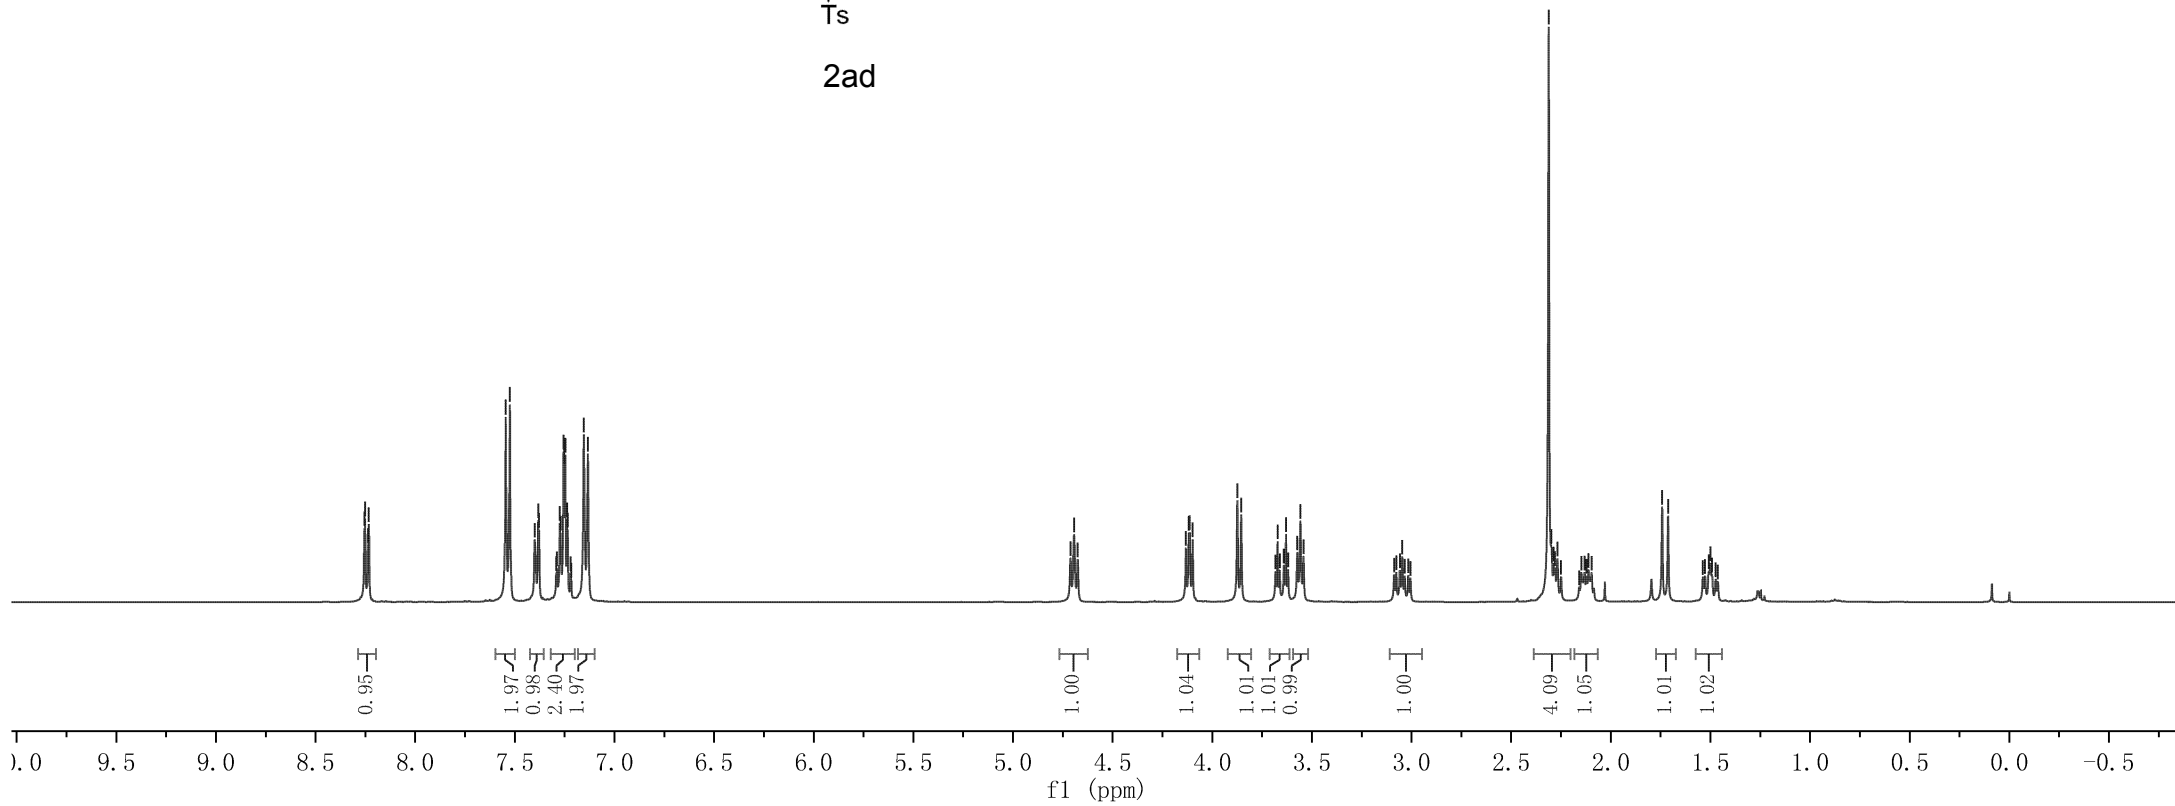

144.49  
137.00  
136.31  
136.02  
129.58  
129.53  
126.09  
124.03  
117.33  
115.48

77.32  
77.21  
77.00  
76.68  
75.64

38.72  
33.99  
32.12

21.42  
20.74

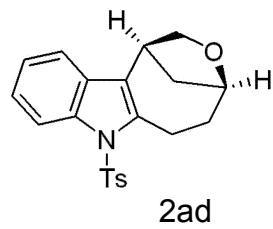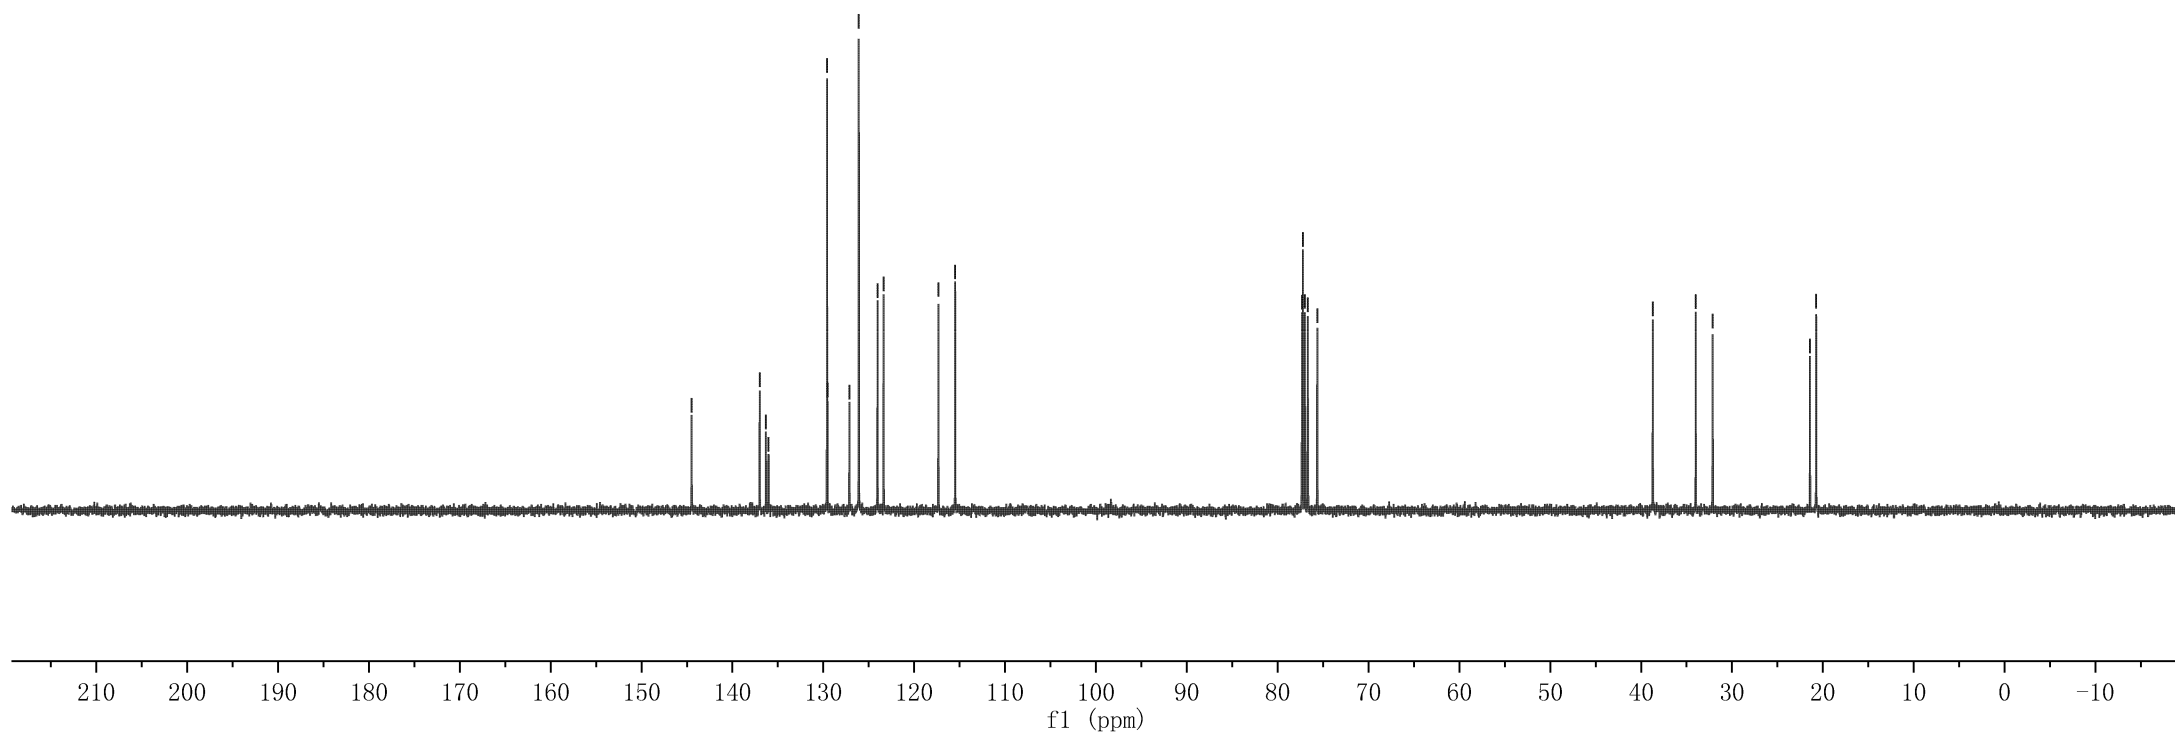

129.59  
126.14  
124.05  
123.85

117.28  
115.54

77.25  
75.68

38.77  
34.01  
32.13

21.45  
20.74

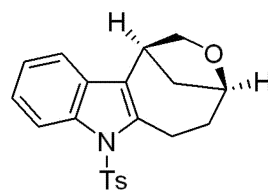

2ad

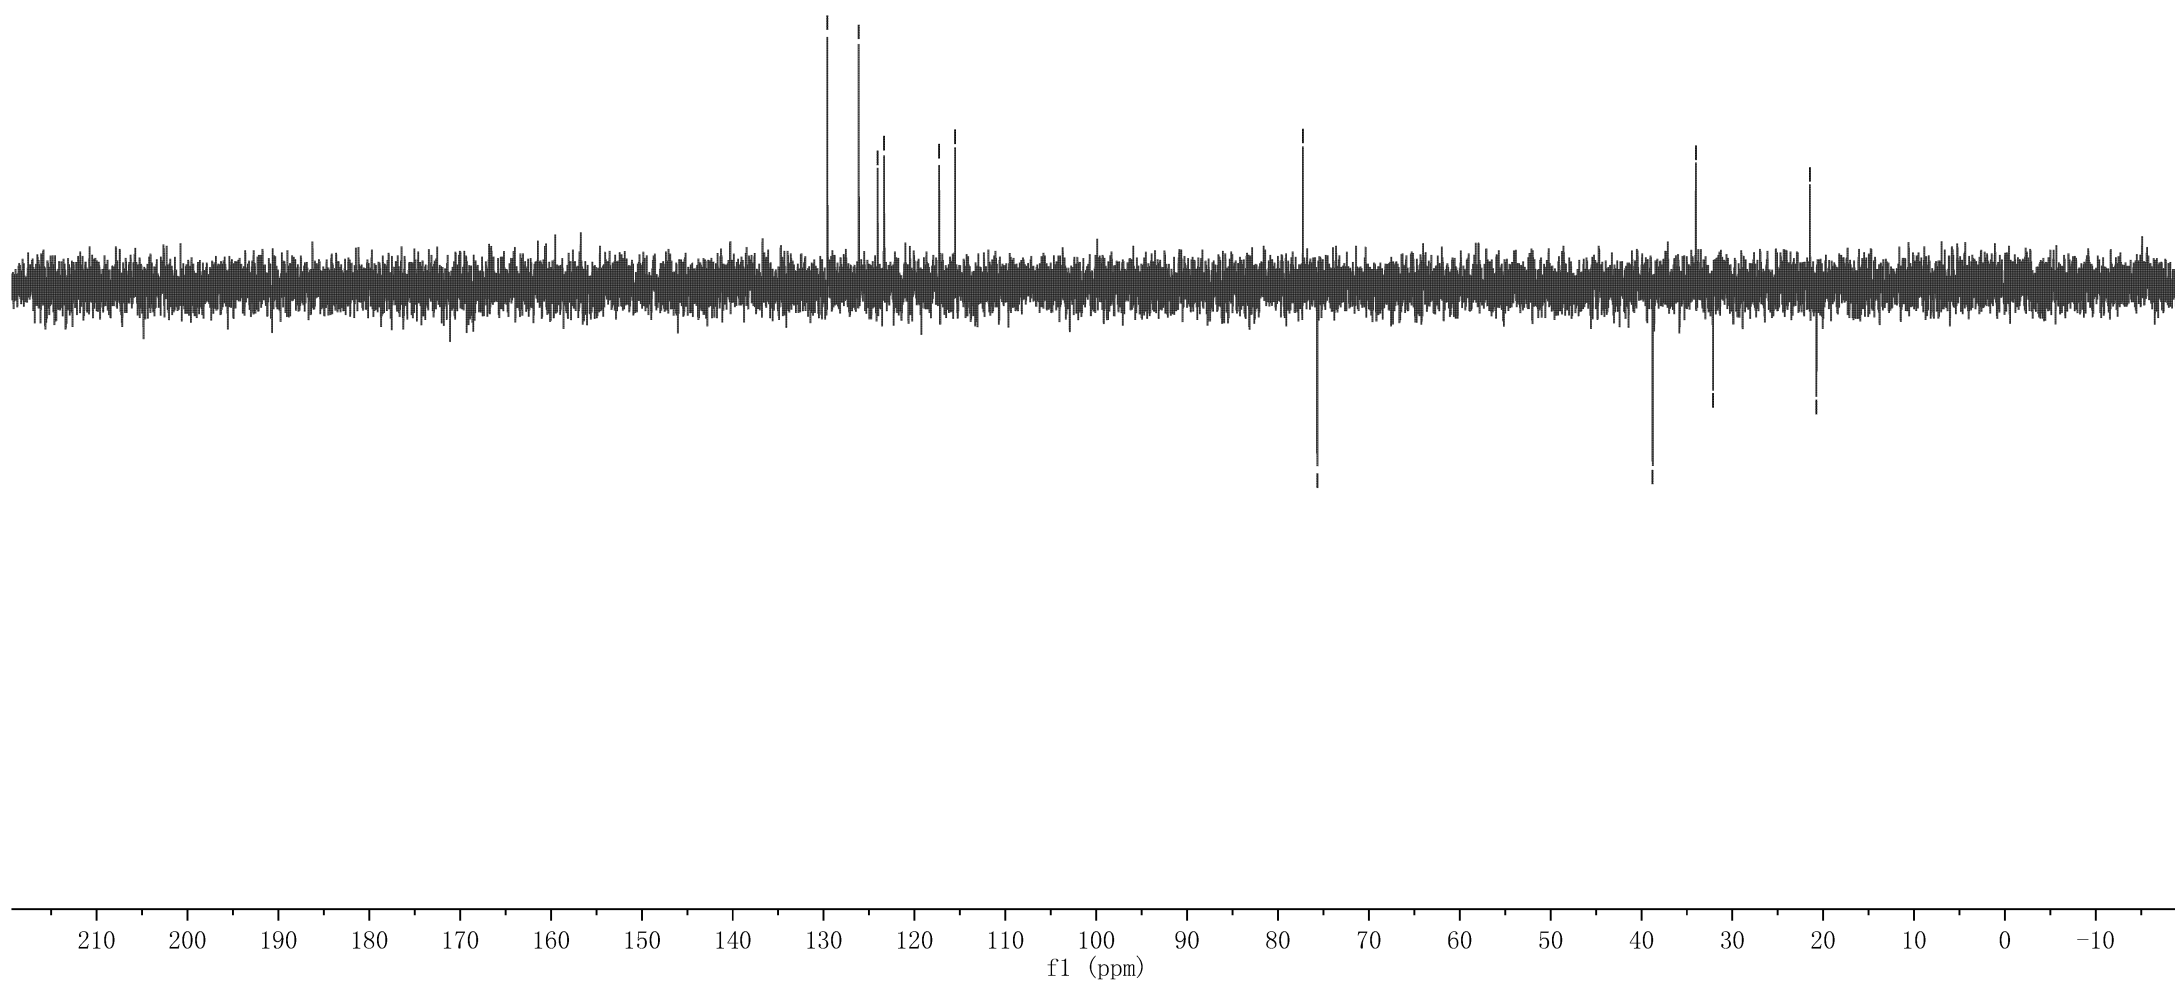

8.270  
8.249  
7.751  
7.749  
7.721  
7.719  
7.633  
7.614  
7.576  
7.555  
7.408  
7.405  
7.350  
7.332  
7.260  
7.167  
7.147  
6.336  
6.324  
6.307

5.112  
5.094  
5.077

4.080  
4.062

2.794  
2.776  
2.763  
2.760  
2.746  
2.728  
2.311  
2.089  
2.057  
2.044

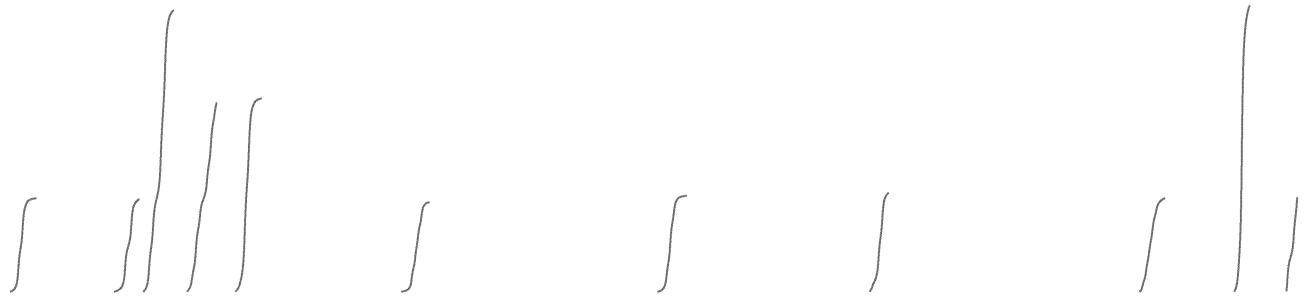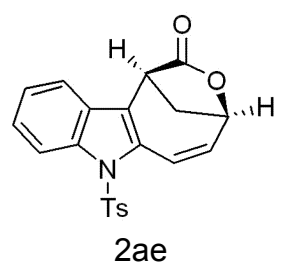

0.99  
0.99  
3.00  
2.01  
2.06

0.95

1.02

1.05

0.99

3.04

1.00

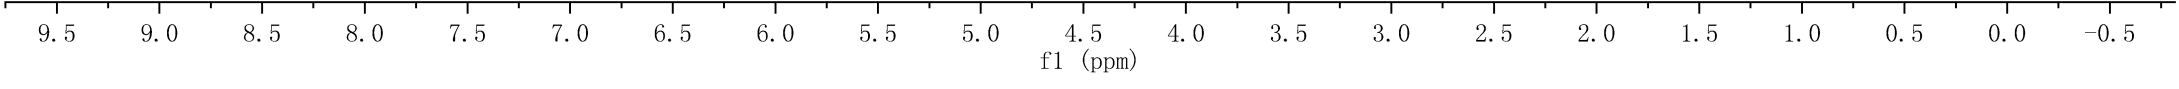

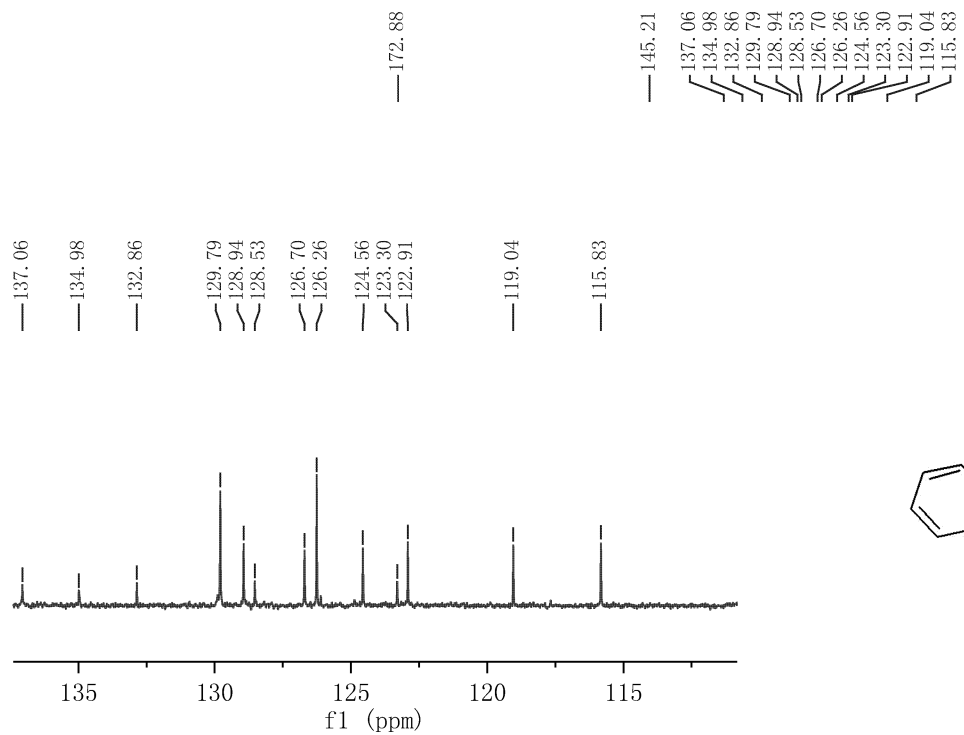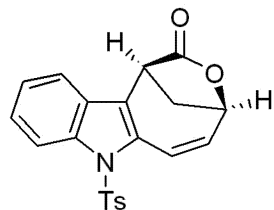

2ae

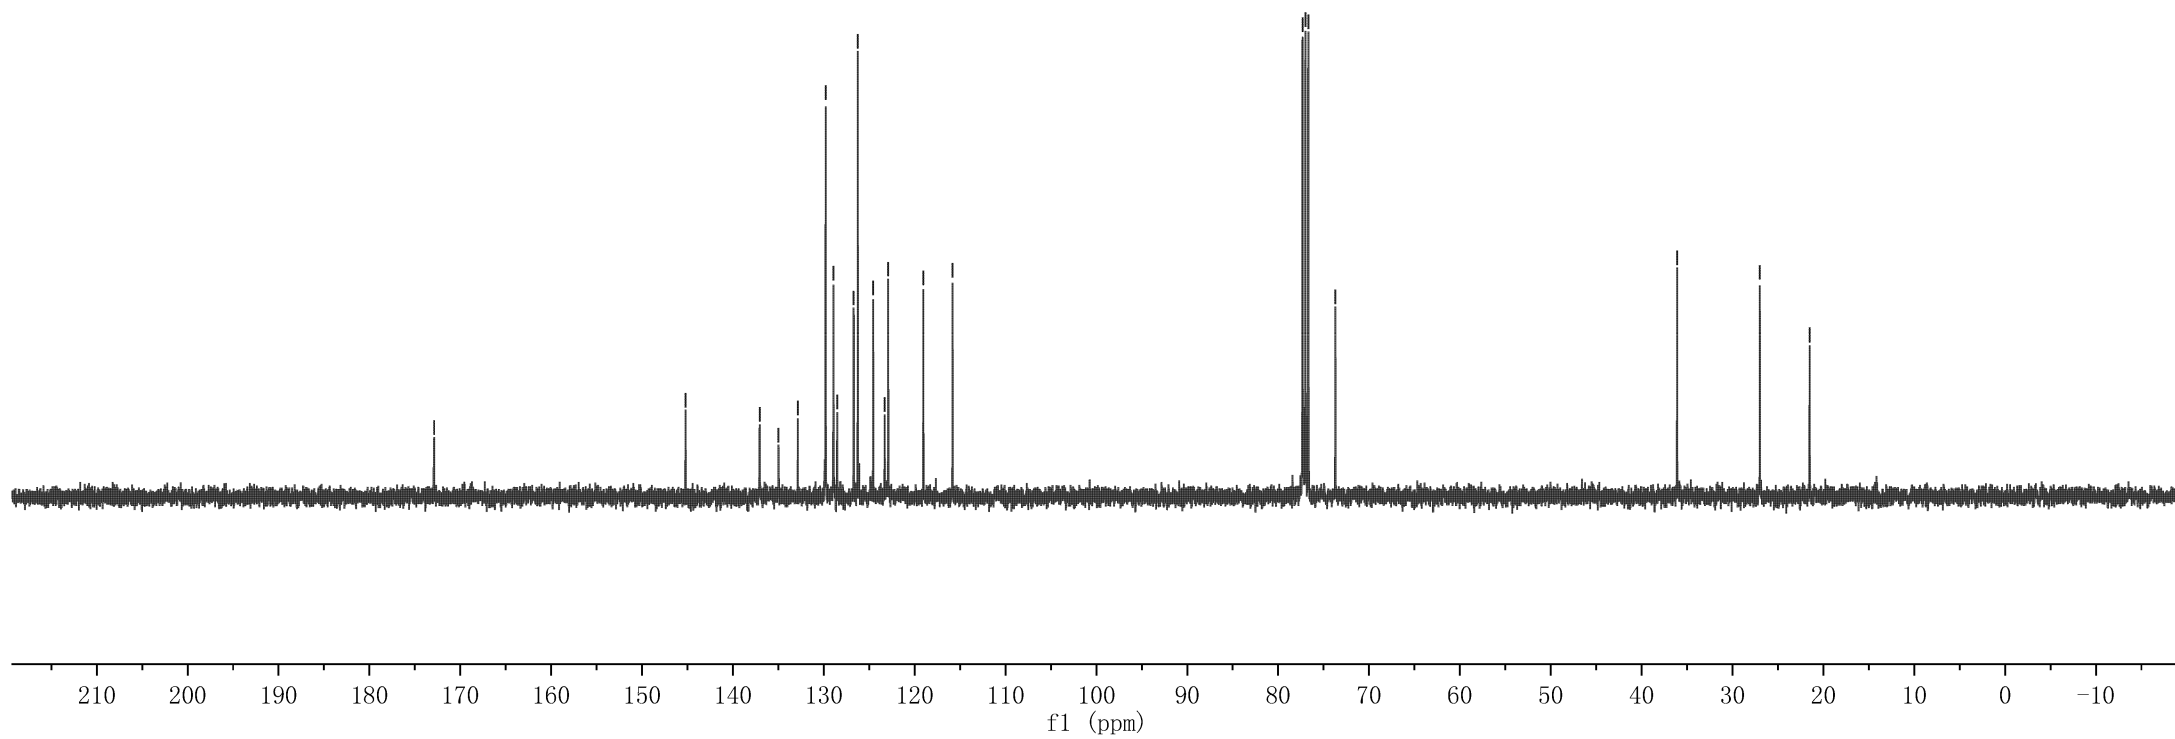

129.79  
128.86  
126.71  
126.27  
124.55  
122.99  
119.02  
115.86

73.69

36.11

27.01

21.51

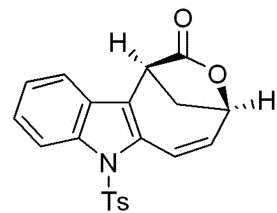

2ae

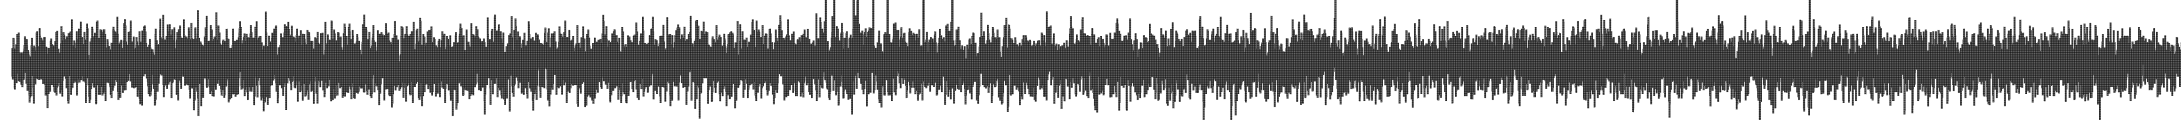

210 200 190 180 170 160 150 140 130 120 110 100 90 80 70 60 50 40 30 20 10 0 -10

f1 (ppm)

8.227  
8.206  
7.994  
7.976  
7.973  
7.597  
7.576  
7.557  
7.480  
7.460  
7.442  
7.260  
7.250  
7.246  
7.225  
7.209  
7.186  
7.179  
7.177  
7.166  
7.160  
7.142

5.123  
5.113  
5.110  
5.100

4.021  
4.012  
4.002  
3.991  
3.987  
3.977  
3.966  
3.958  
3.700  
3.683  
3.679  
3.662  
3.658  
3.655  
3.653  
3.111  
3.107  
3.093

2.560  
2.525  
2.339  
2.208  
2.189  
1.984  
1.974  
1.958  
1.949  
1.940  
1.867  
1.864  
1.562  
1.540  
1.534  
1.518  
1.513  
1.506  
1.484

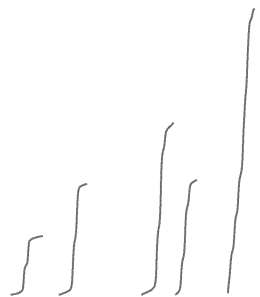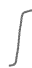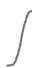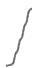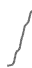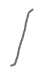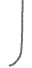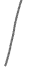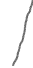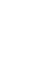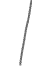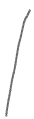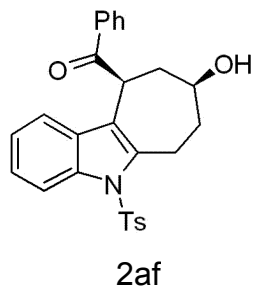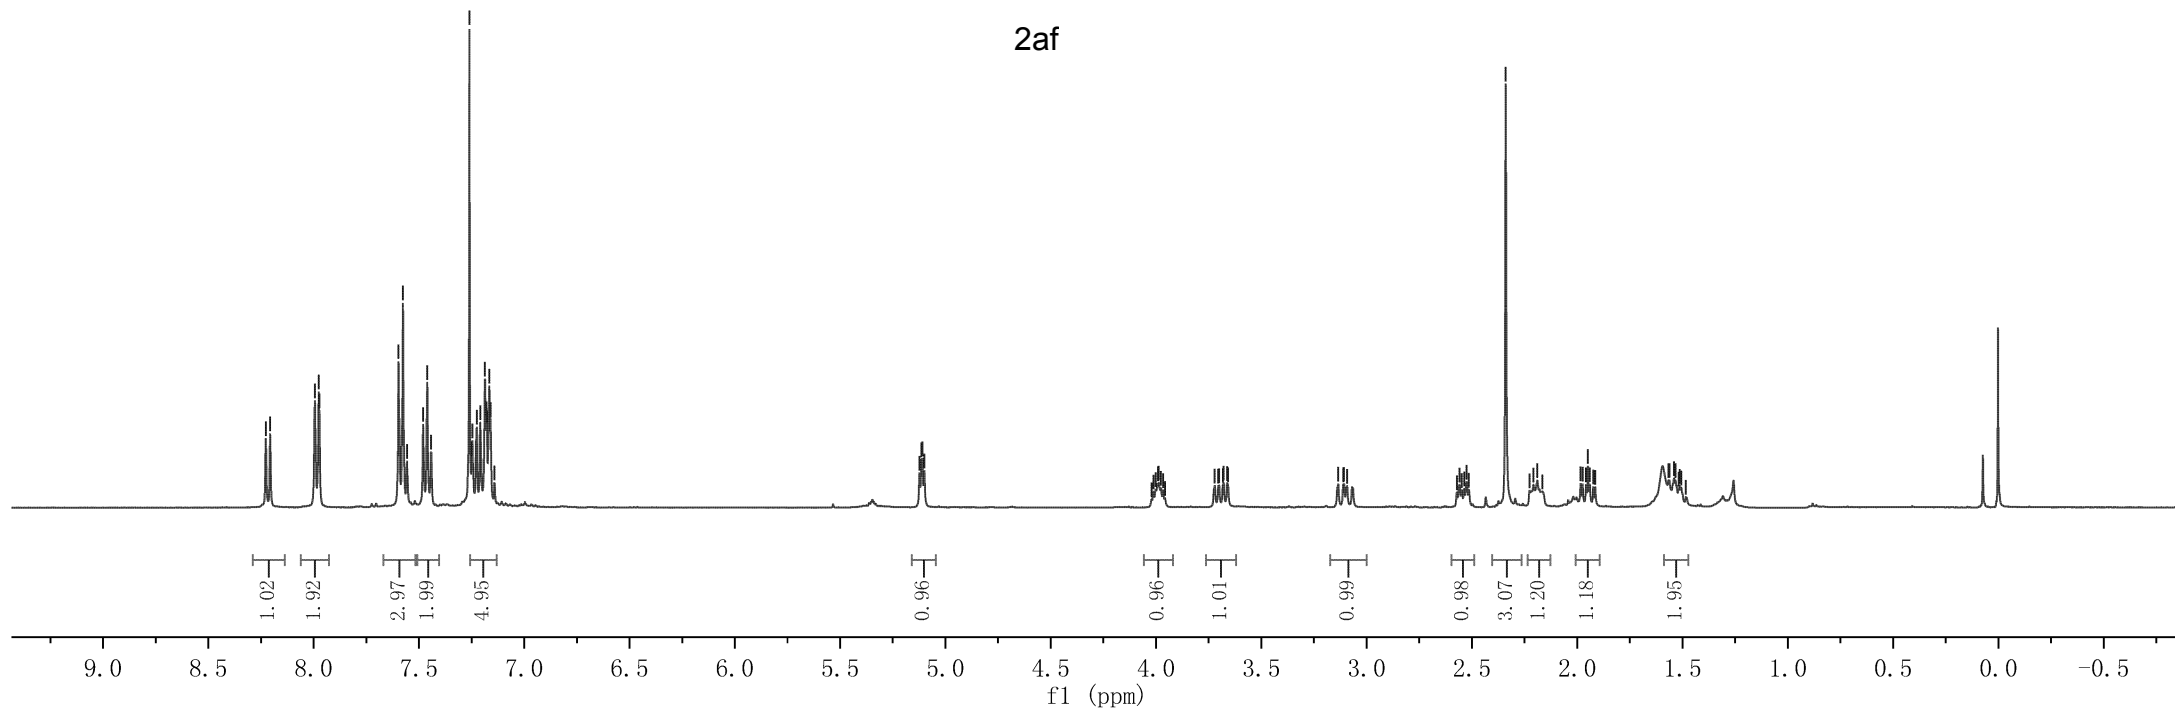



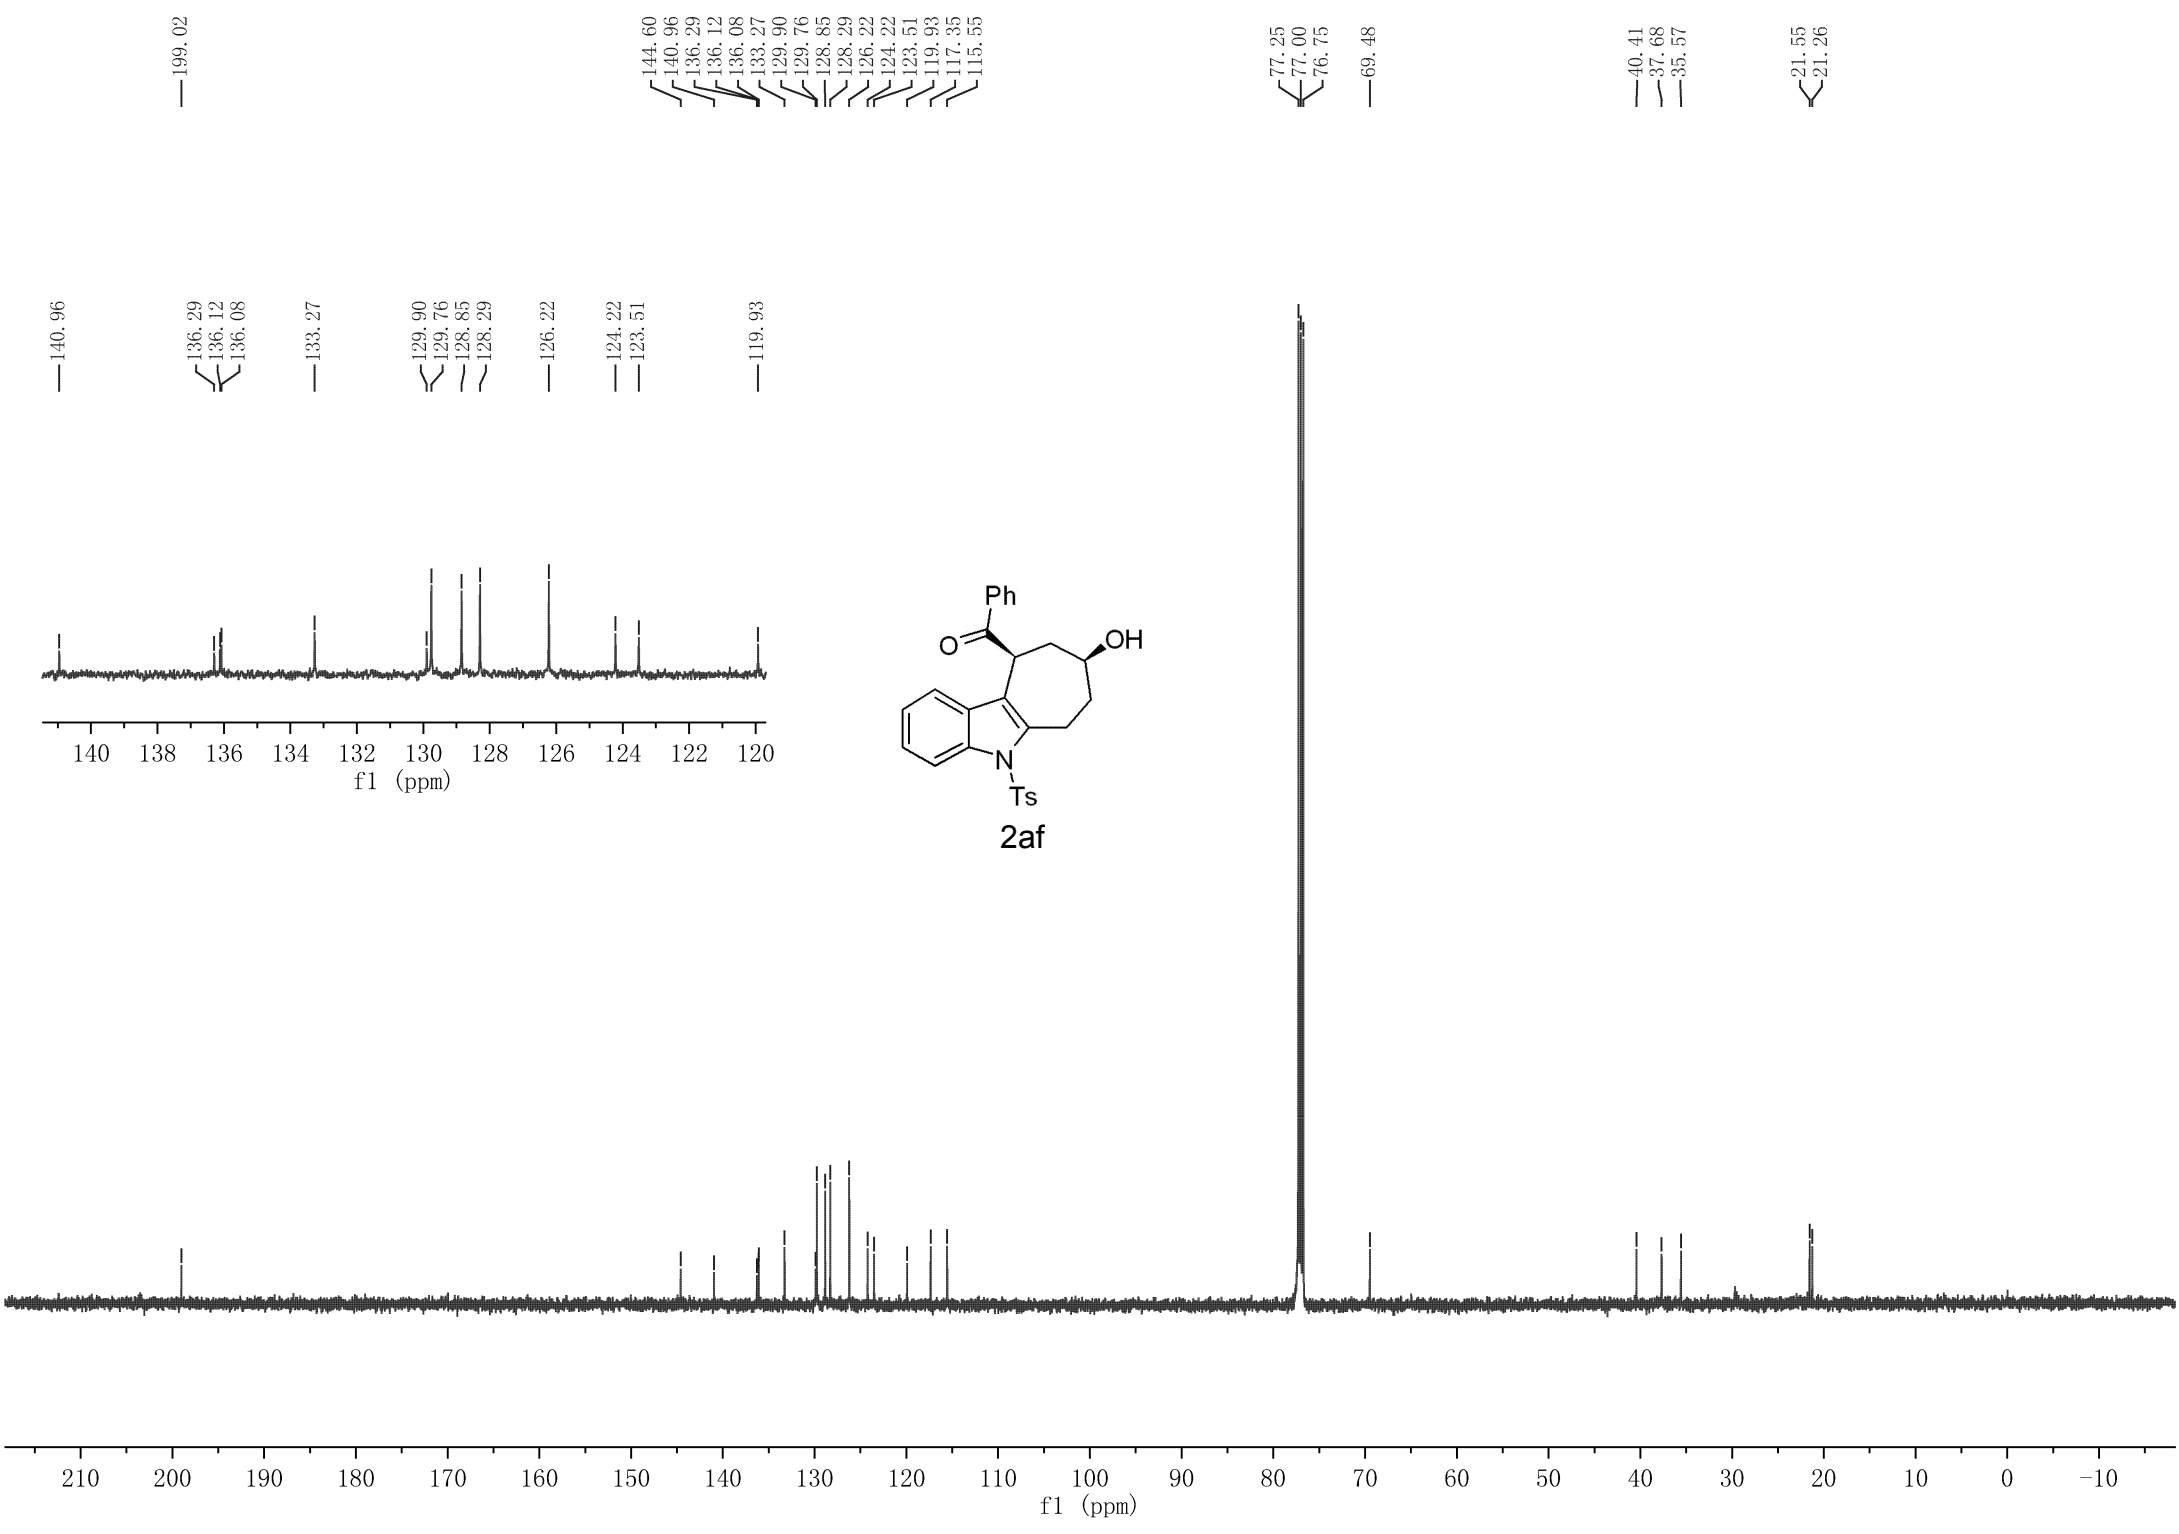

133.29  
129.77  
128.86  
128.31  
126.23  
124.23  
123.53  
117.37  
115.55

69.48

40.42  
37.68  
35.56

21.56  
21.26

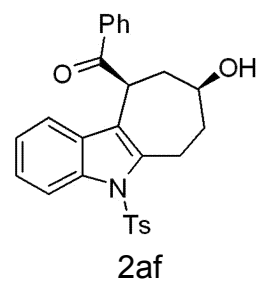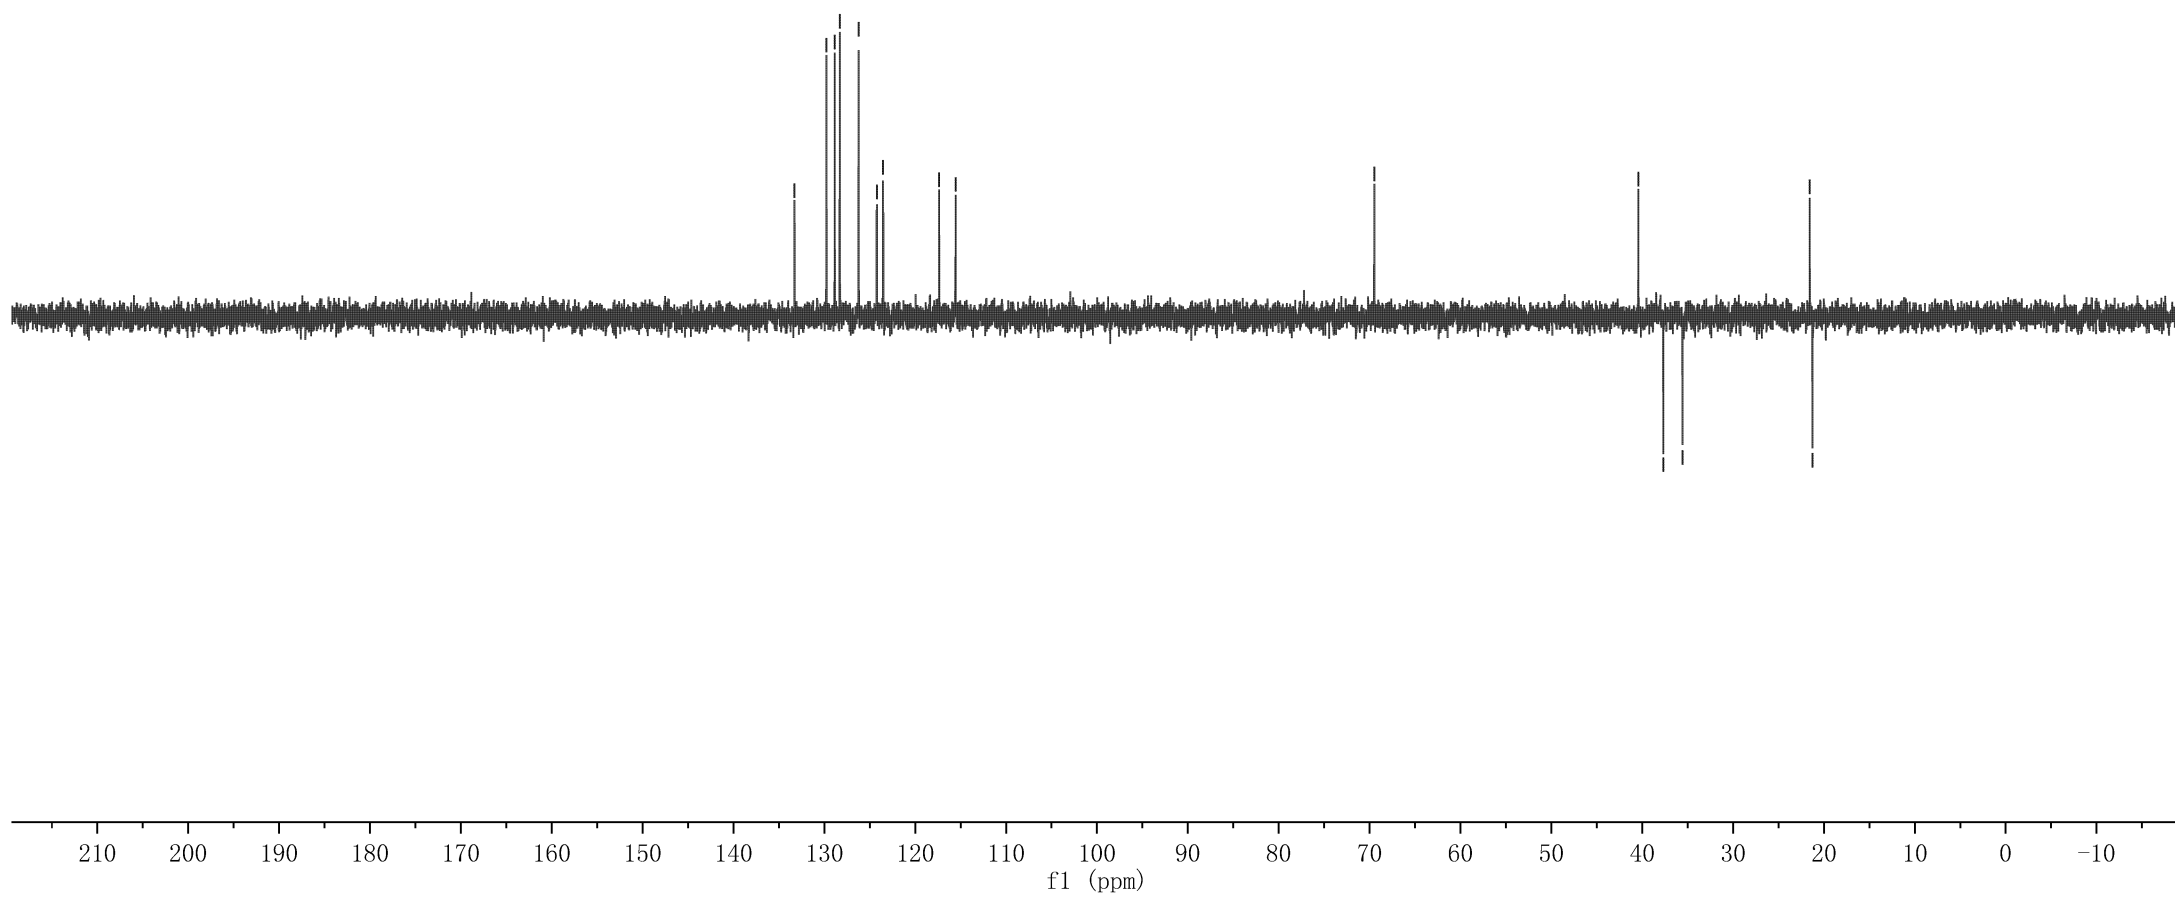

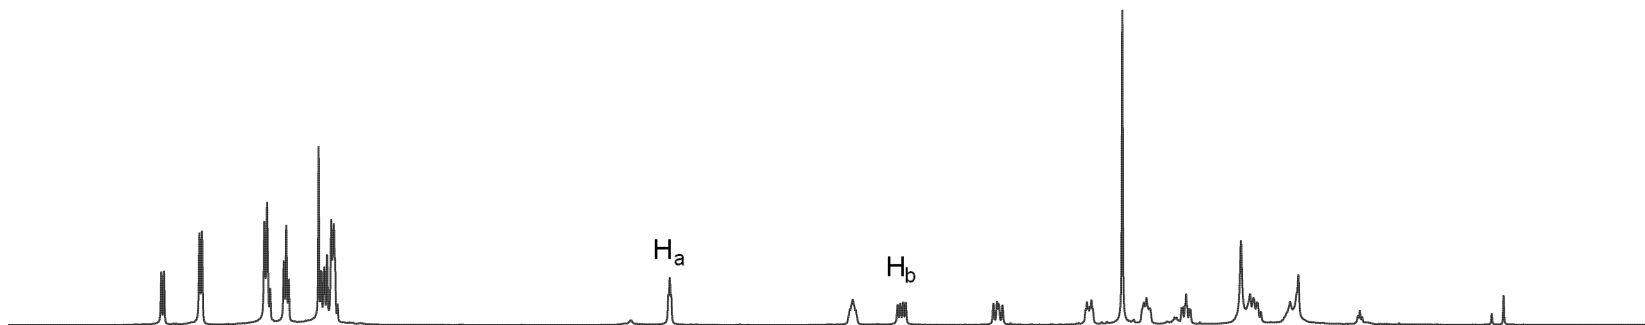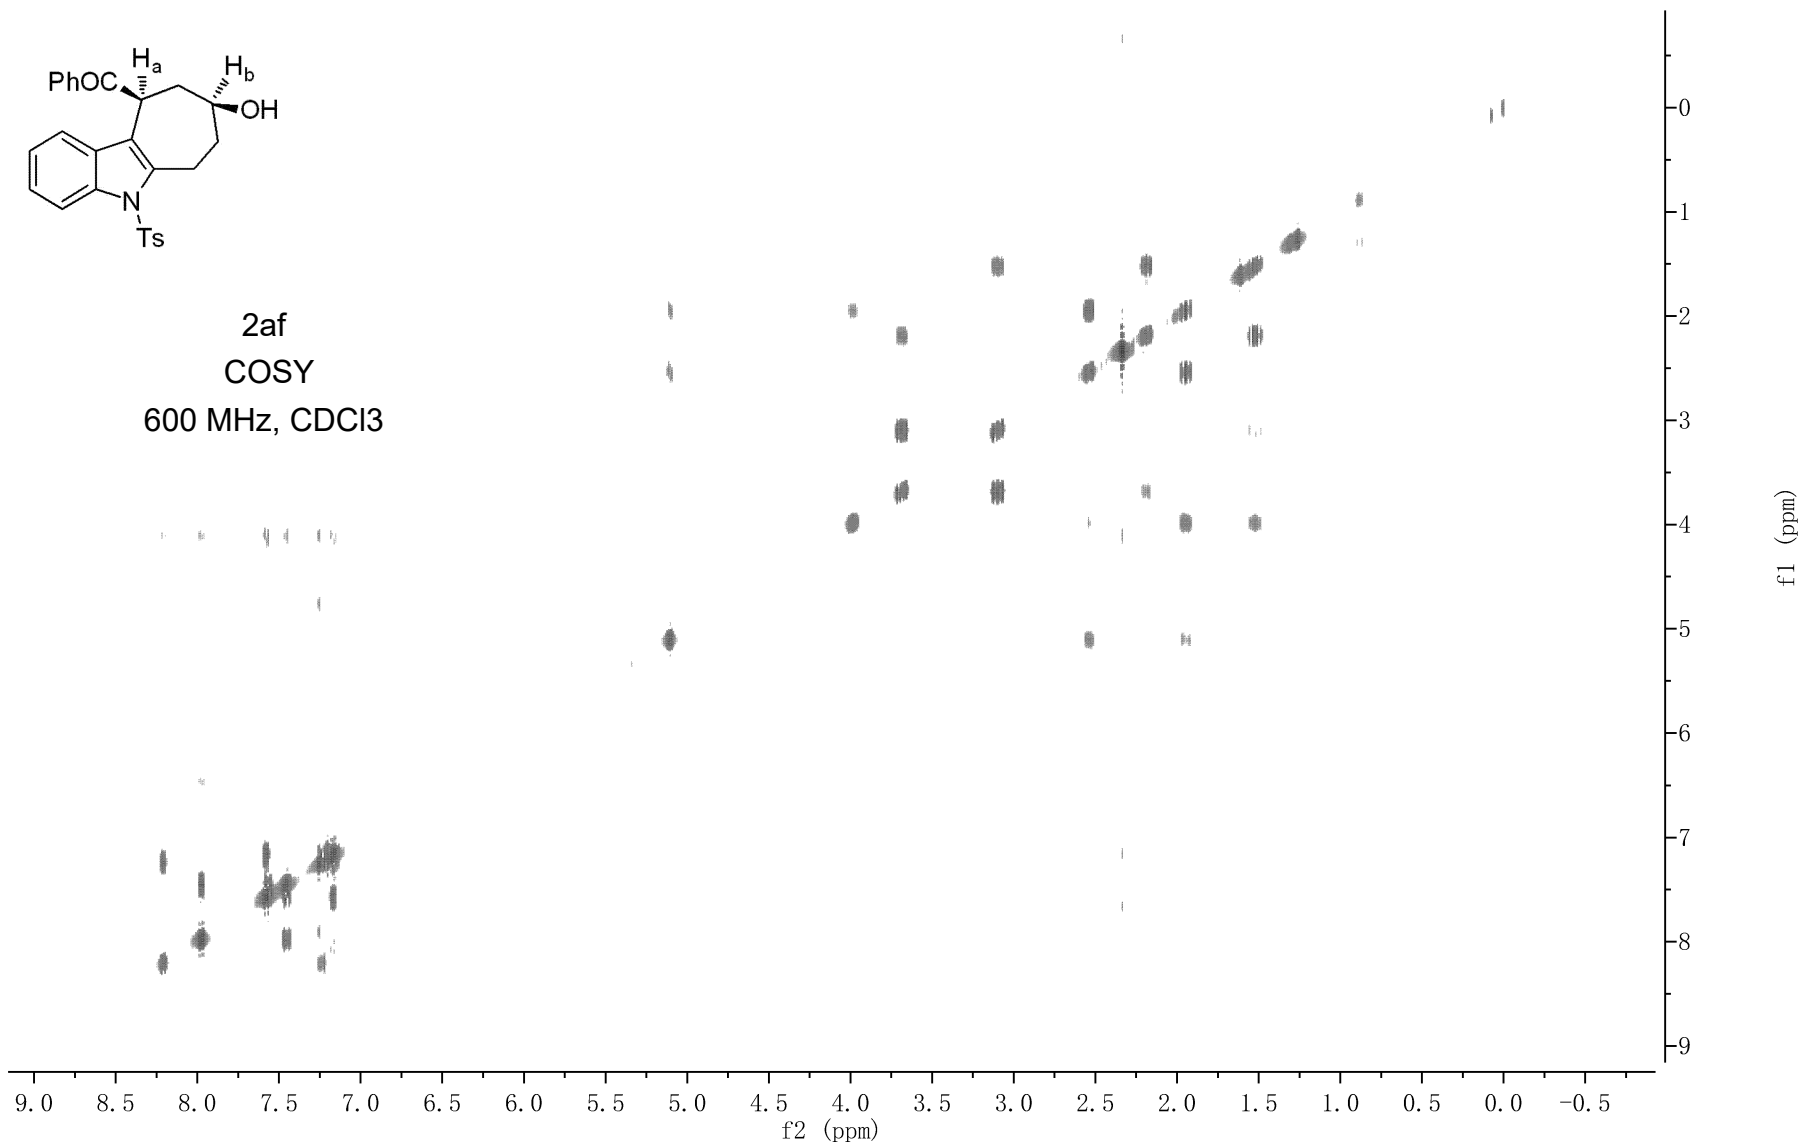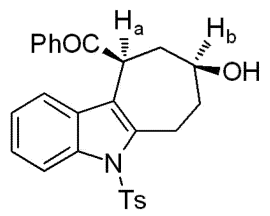

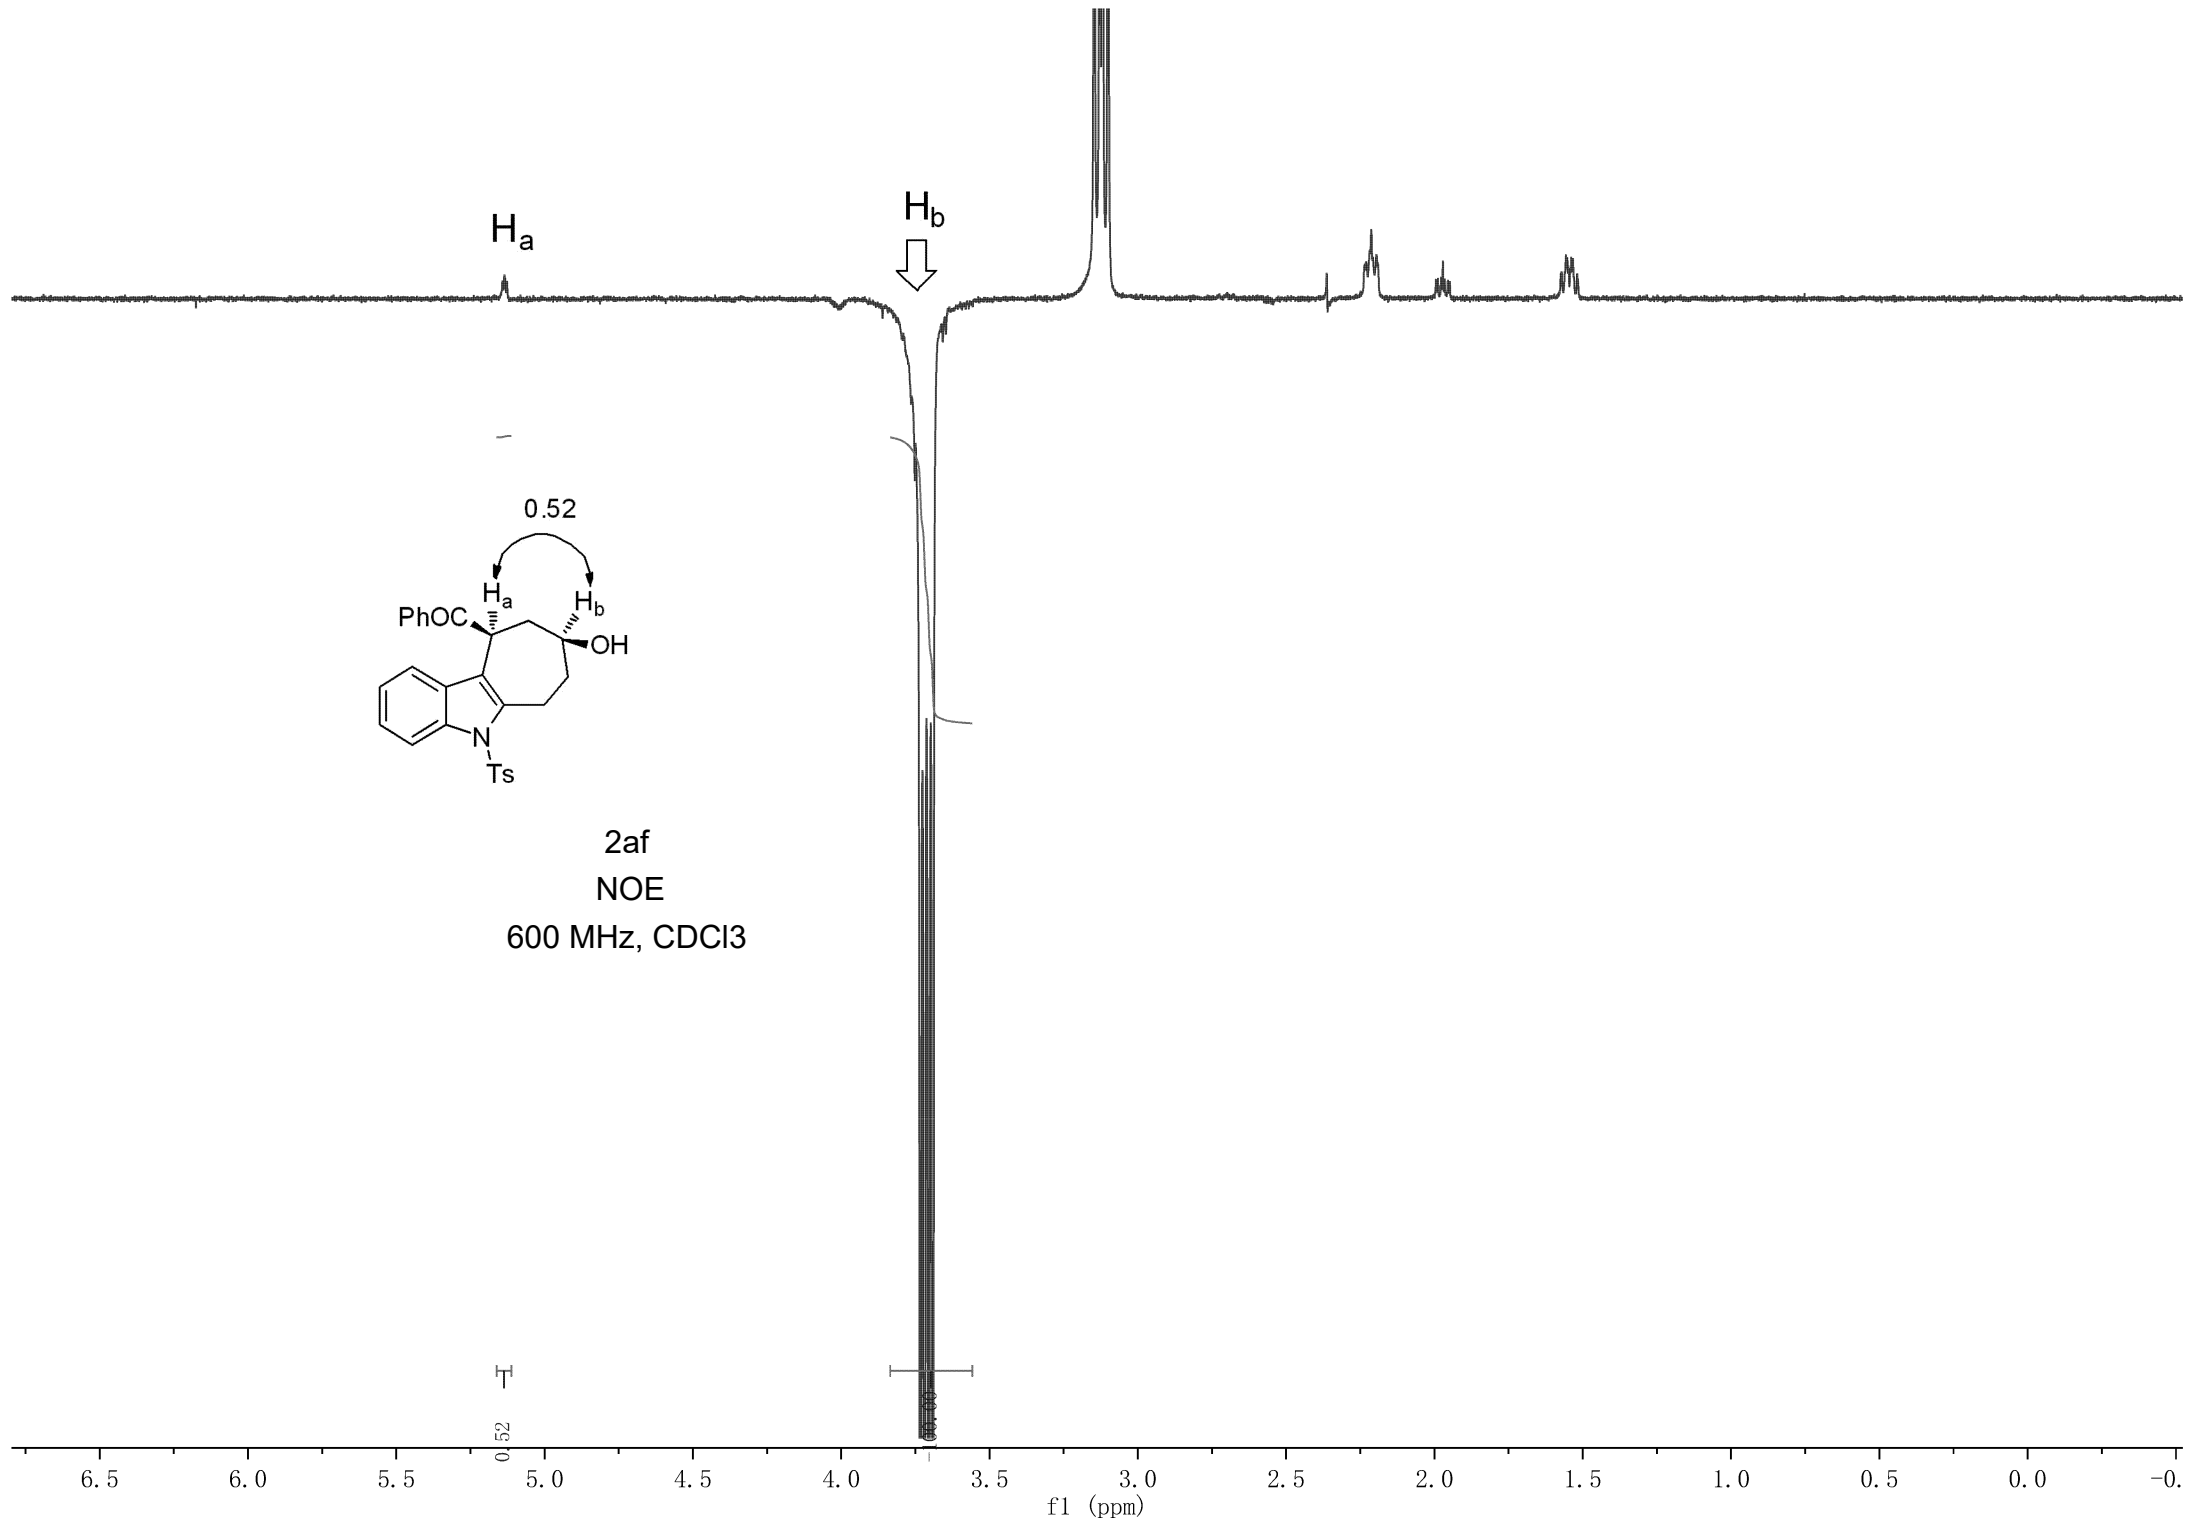

8.218  
8.199  
7.566  
7.545  
7.360  
7.342  
7.339  
7.295  
7.291  
7.276  
7.273  
7.260  
7.251  
7.247  
7.232  
7.229  
7.214  
7.211  
7.182  
7.161

4.302  
4.292  
4.282  
4.274  
4.264  
4.255  
3.825  
3.809  
3.467  
3.372  
3.367  
3.354  
3.346  
3.329  
3.227  
3.210  
3.205  
2.330  
2.317  
2.306  
2.288  
2.006  
1.997  
1.988  
1.969  
1.959  
1.950  
1.933  
1.928  
1.892  
1.887  
1.881  
1.862  
1.857  
1.820

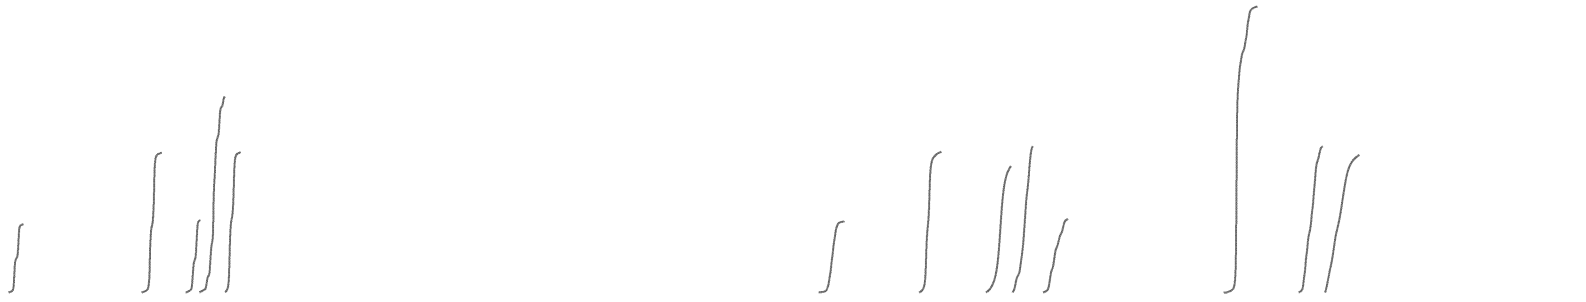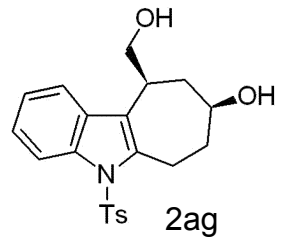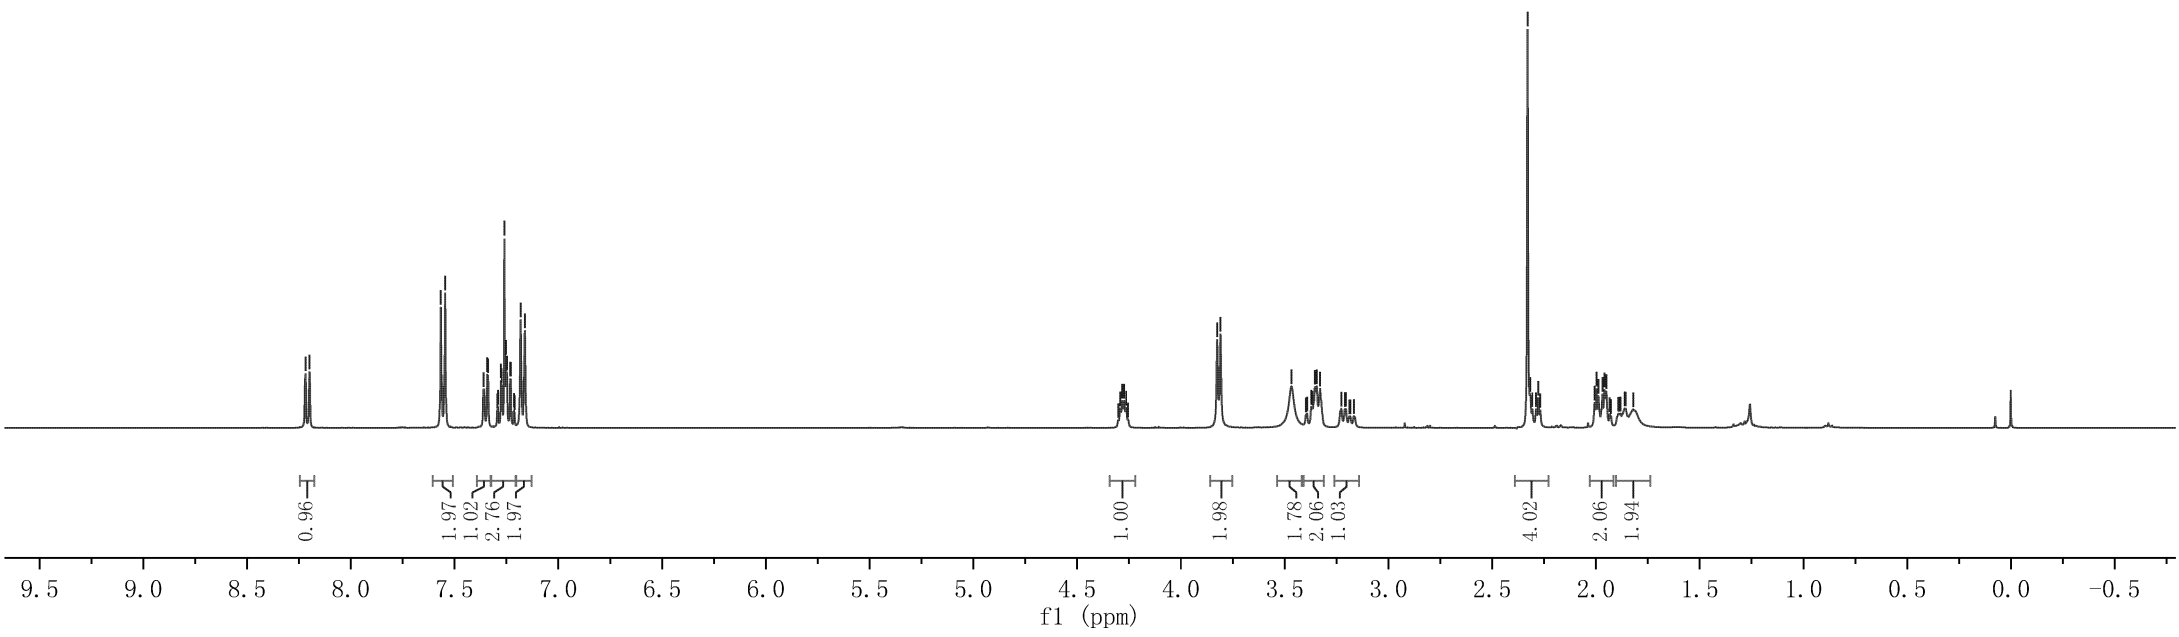

144.65  
139.30  
136.52  
136.12  
130.26  
129.74  
126.16  
124.18  
123.55  
122.19  
117.73  
115.42

77.32  
77.00  
76.68  
69.90  
65.06

36.03  
35.12  
34.00

21.50  
20.96

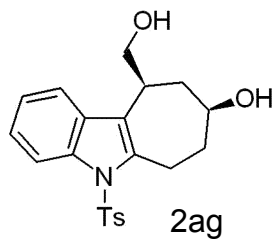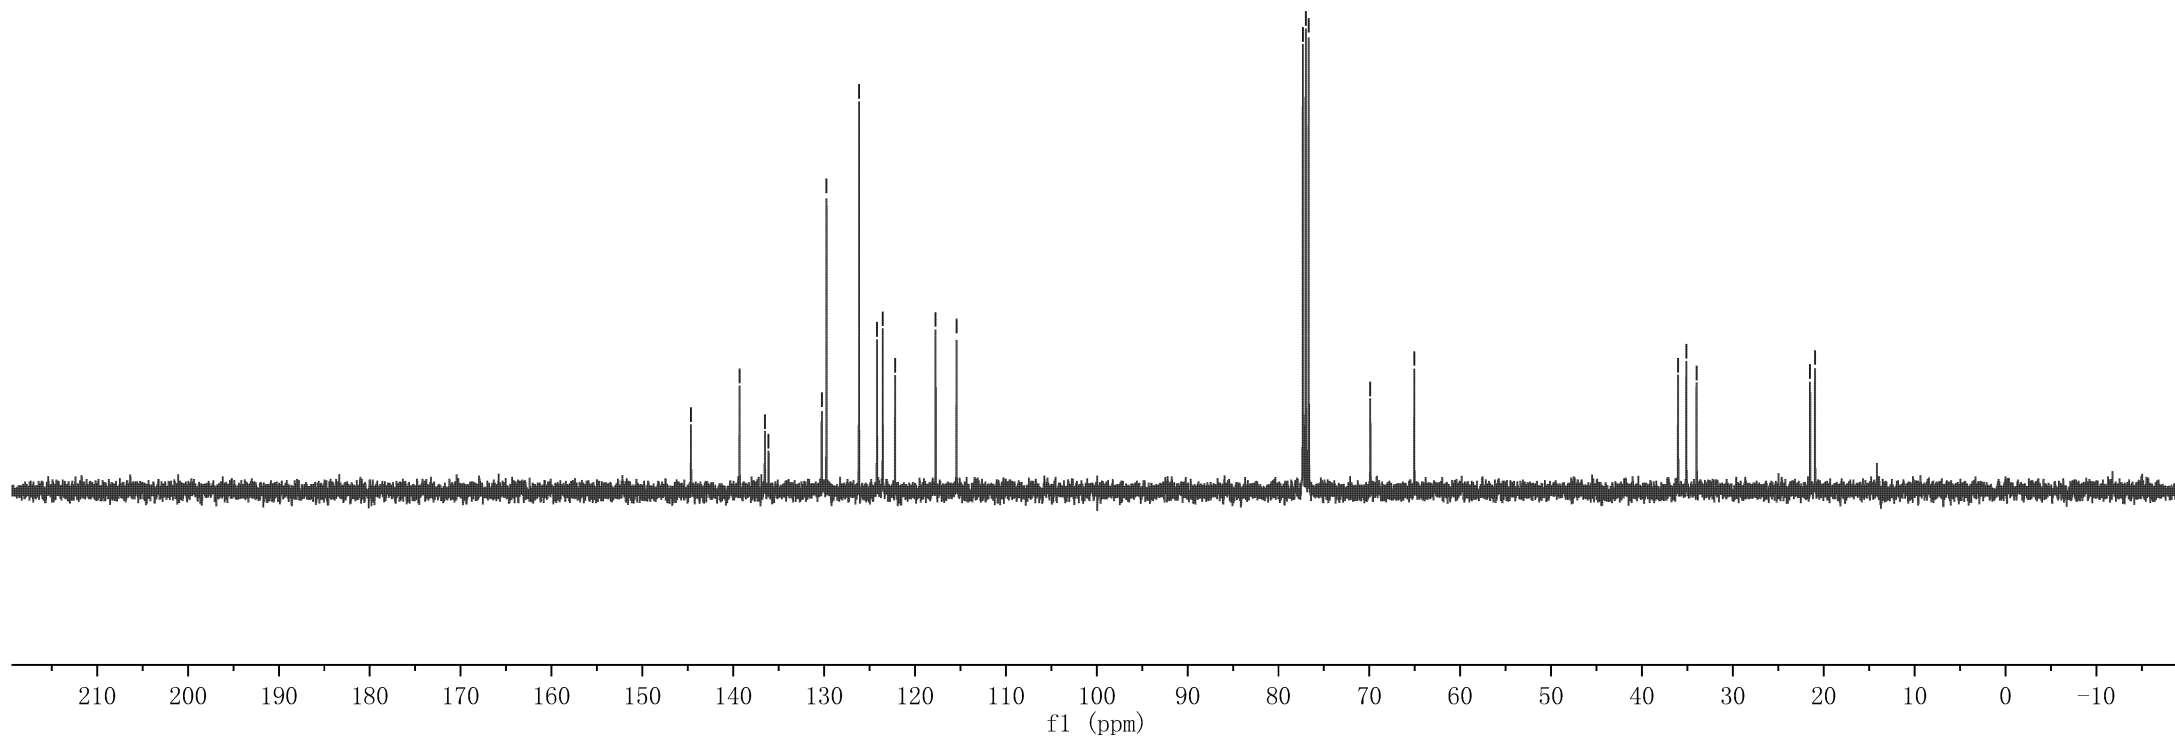

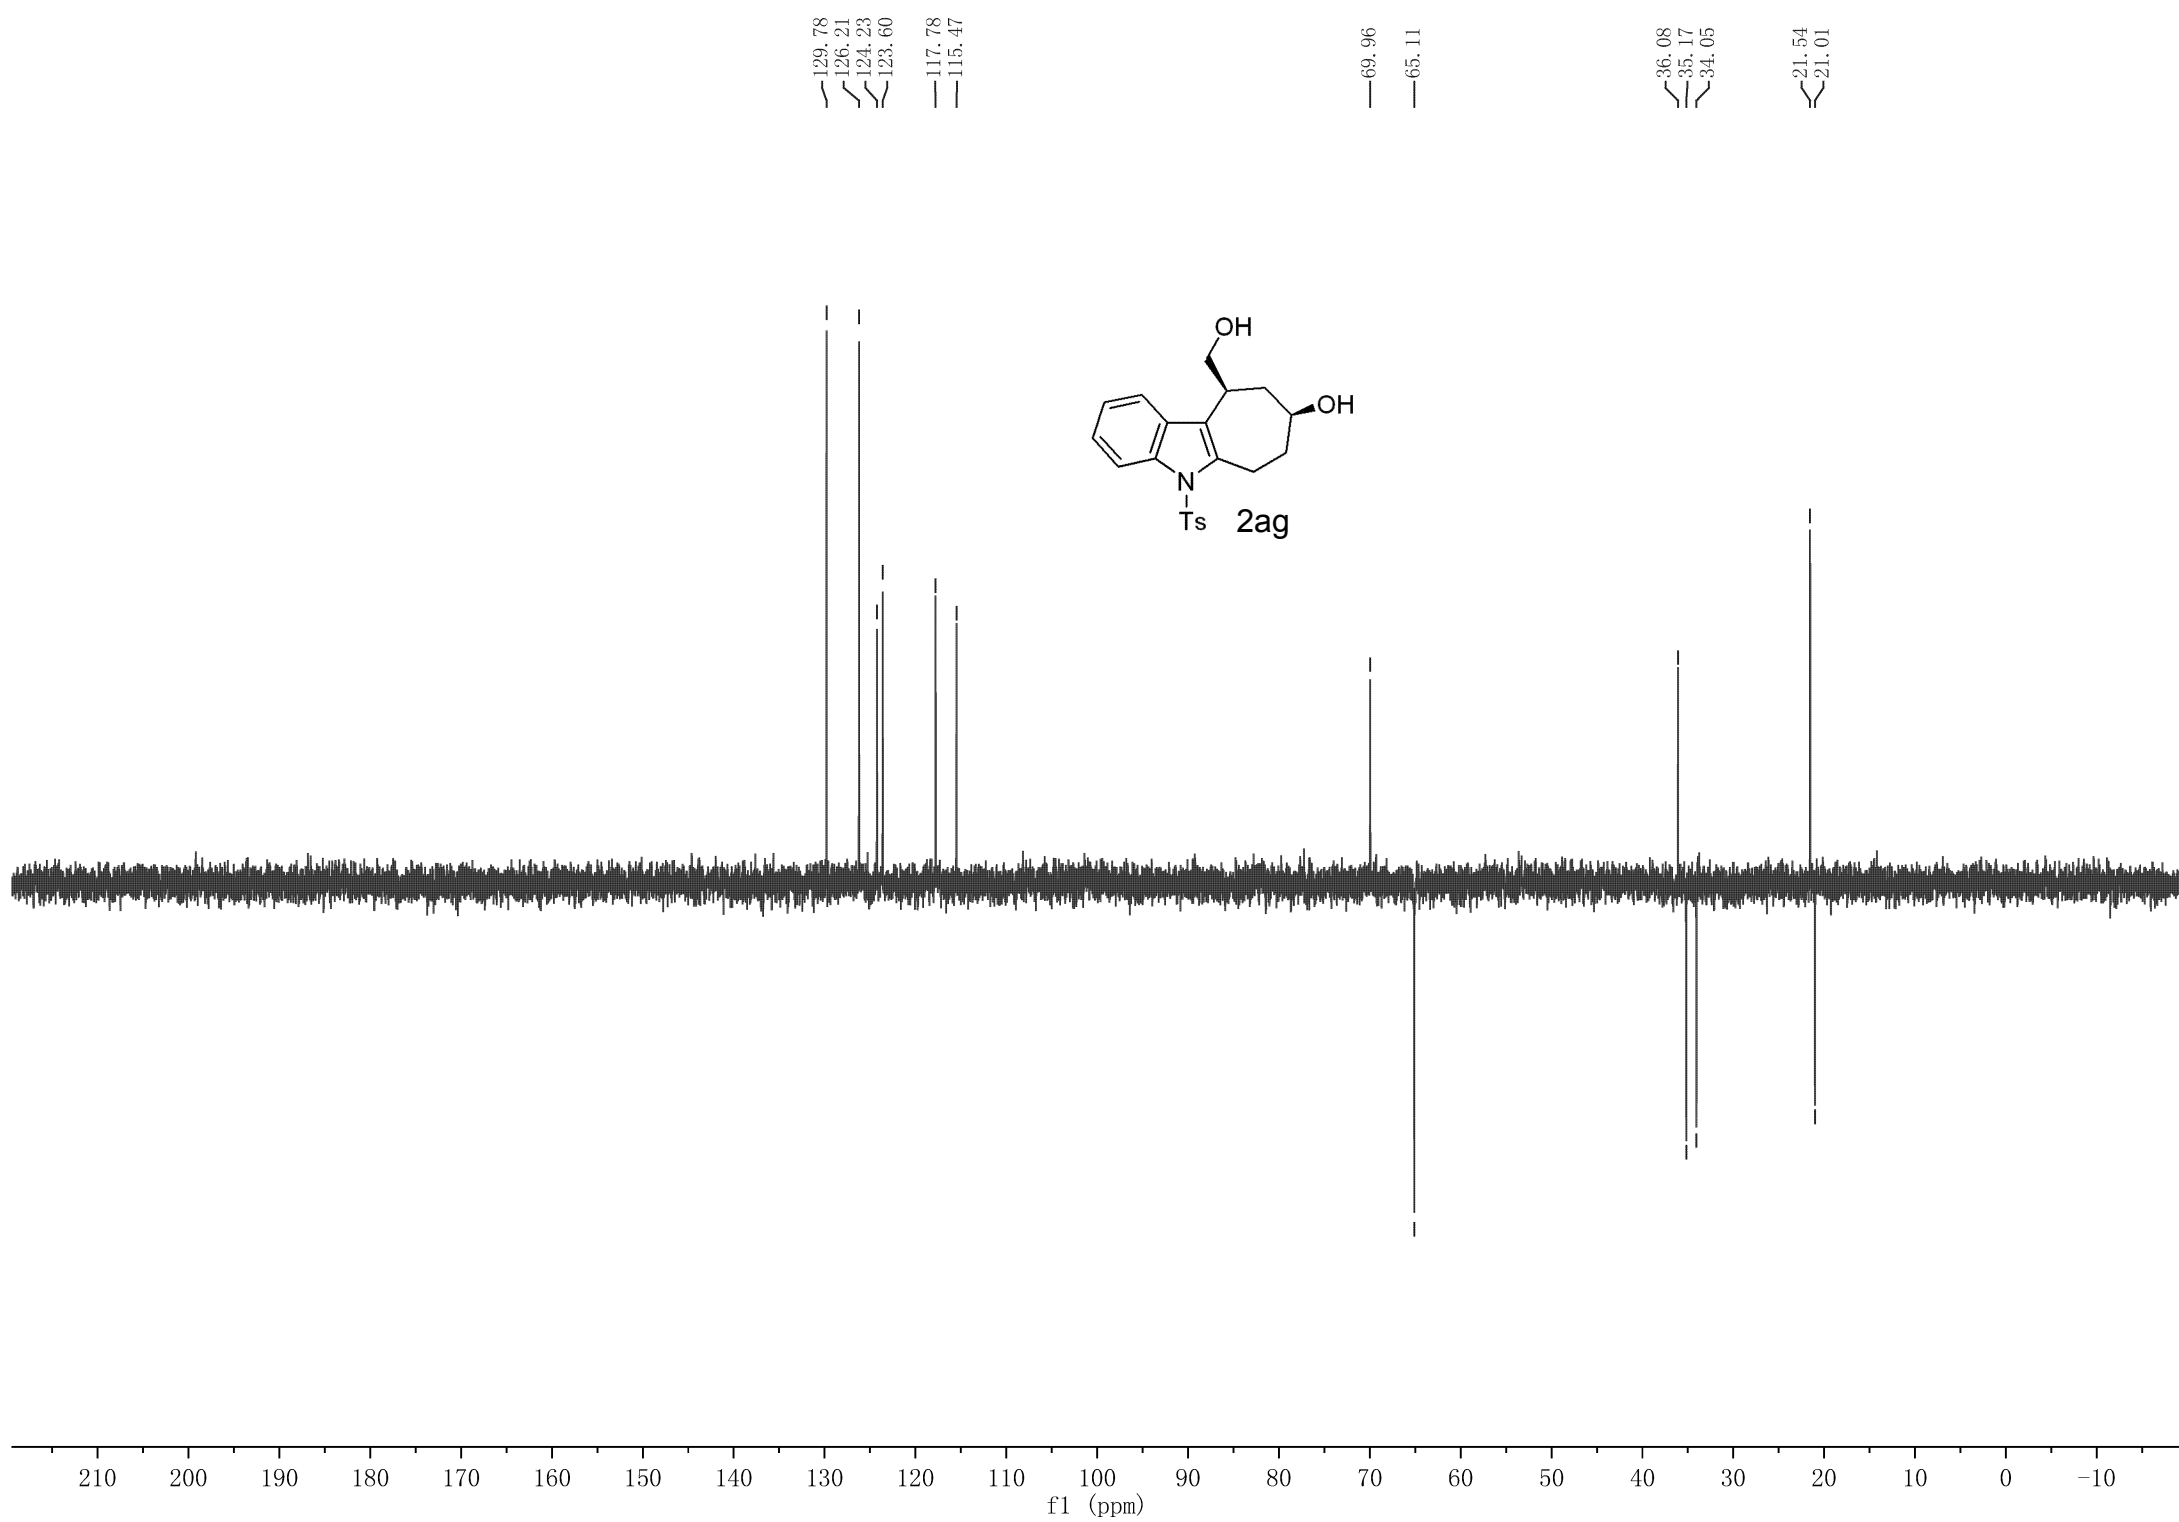

8.279  
8.258  
8.249  
8.244  
8.239  
8.227  
8.222  
8.216  
8.073  
8.068  
8.063  
8.051  
8.046  
8.040  
7.591  
7.587  
7.575  
7.570  
7.564  
7.560  
7.376  
7.373  
7.358  
7.355  
7.337  
7.334  
7.313  
7.311  
7.294  
7.292  
7.276  
7.274  
7.260  
7.190  
7.170

4.695  
4.682  
4.667  
4.654  
4.276  
4.254  
4.226  
3.837  
3.823  
3.815  
3.611  
3.477  
3.468  
3.059  
3.043  
3.028  
3.015  
2.734  
2.722  
2.654  
2.625

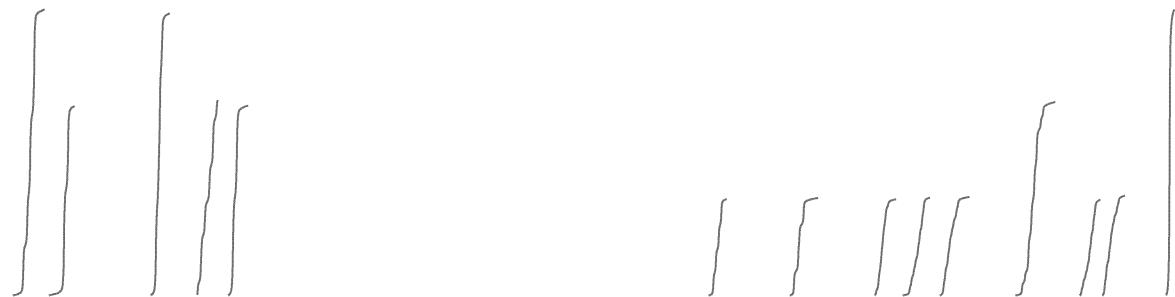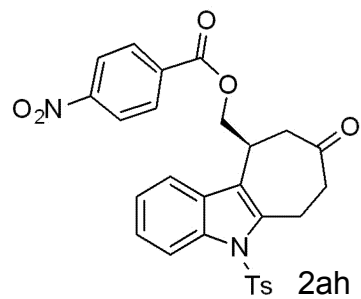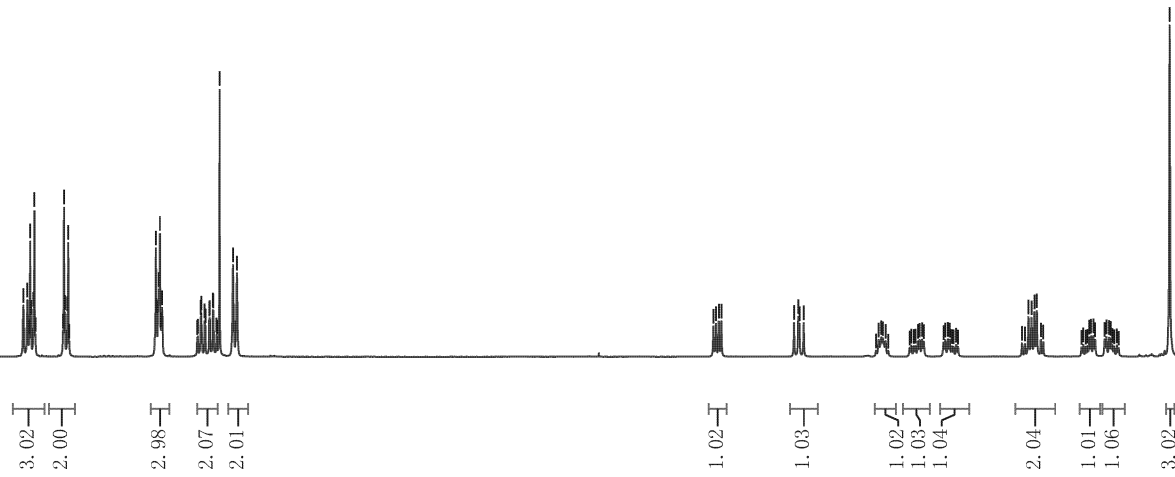

3.02  
2.00  
2.98  
2.07  
2.01  
1.02  
1.03  
1.04  
2.04  
1.01  
1.06  
3.02

10.0 9.5 9.0 8.5 8.0 7.5 7.0 6.5 6.0 5.5 5.0 4.5 4.0 3.5 3.0 2.5 2.0 1.5 1.0 0.5 0.0 -0.5 -1.0



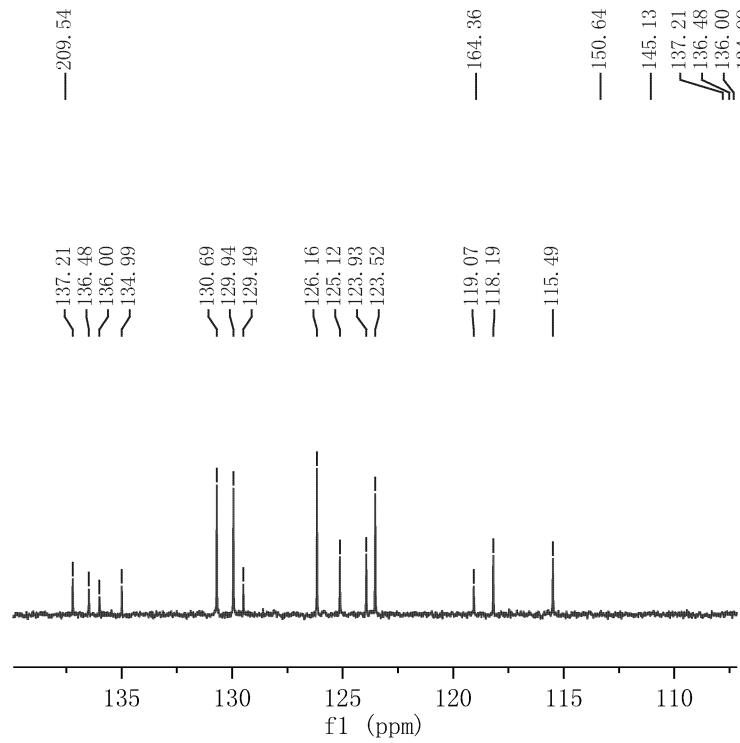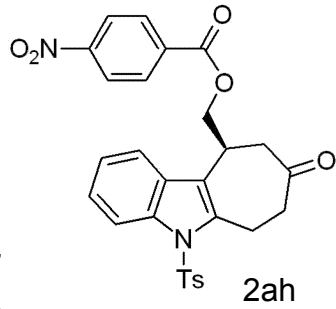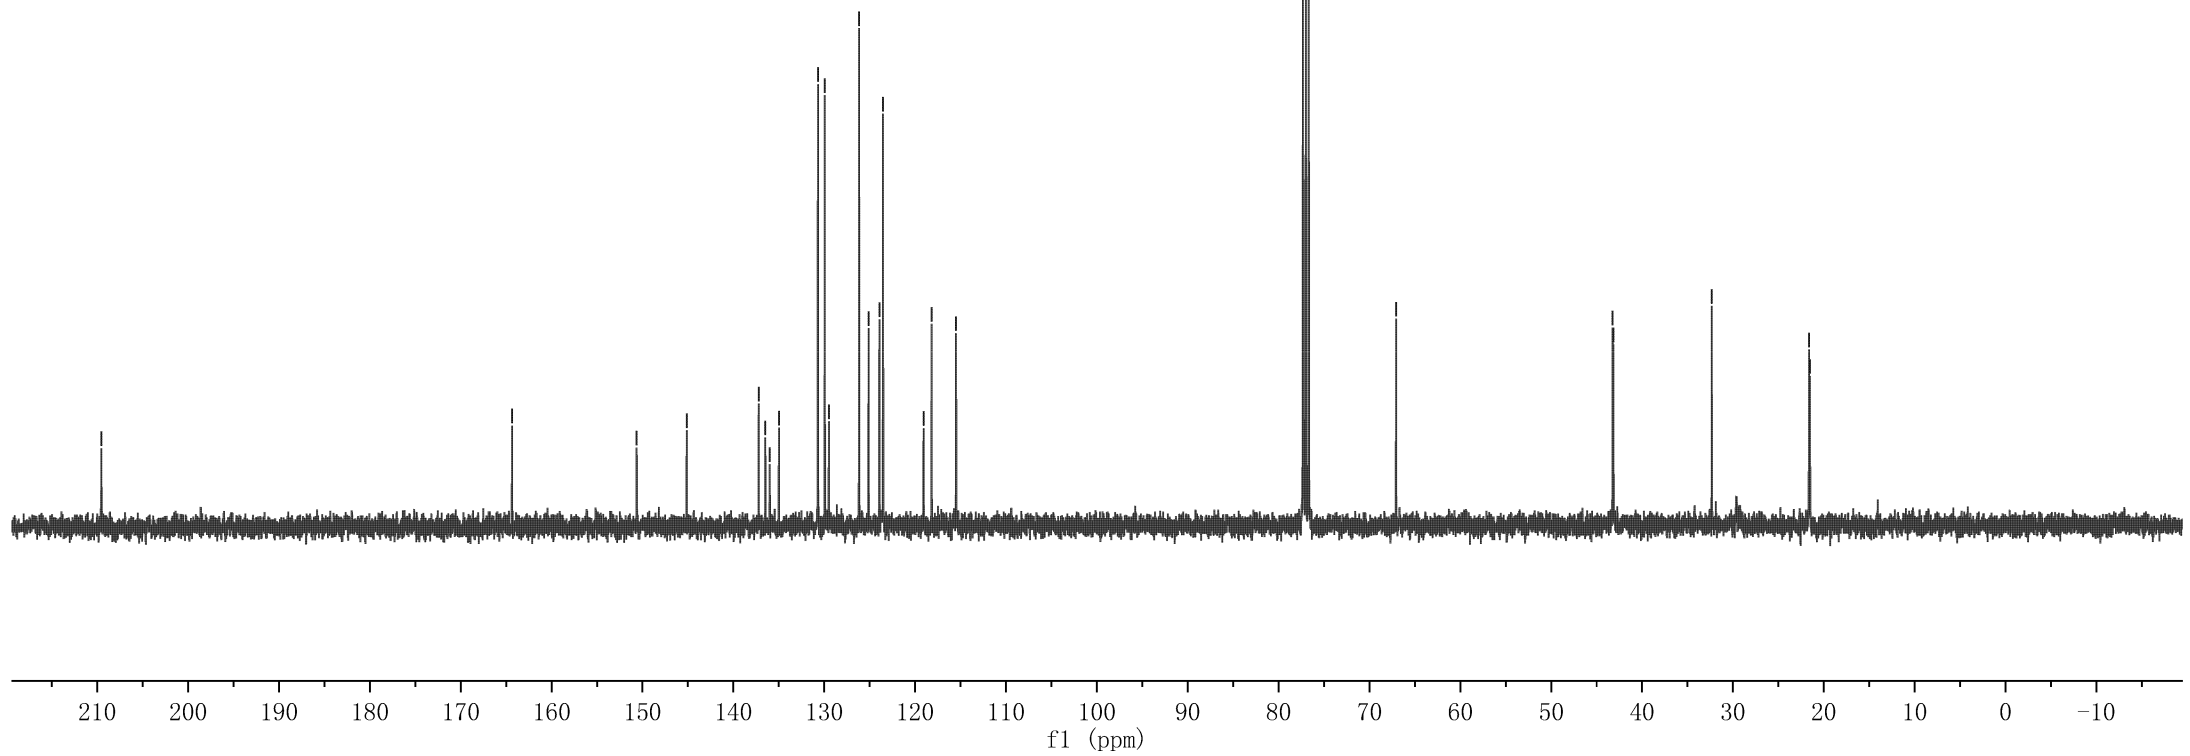

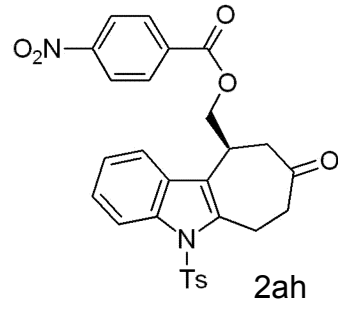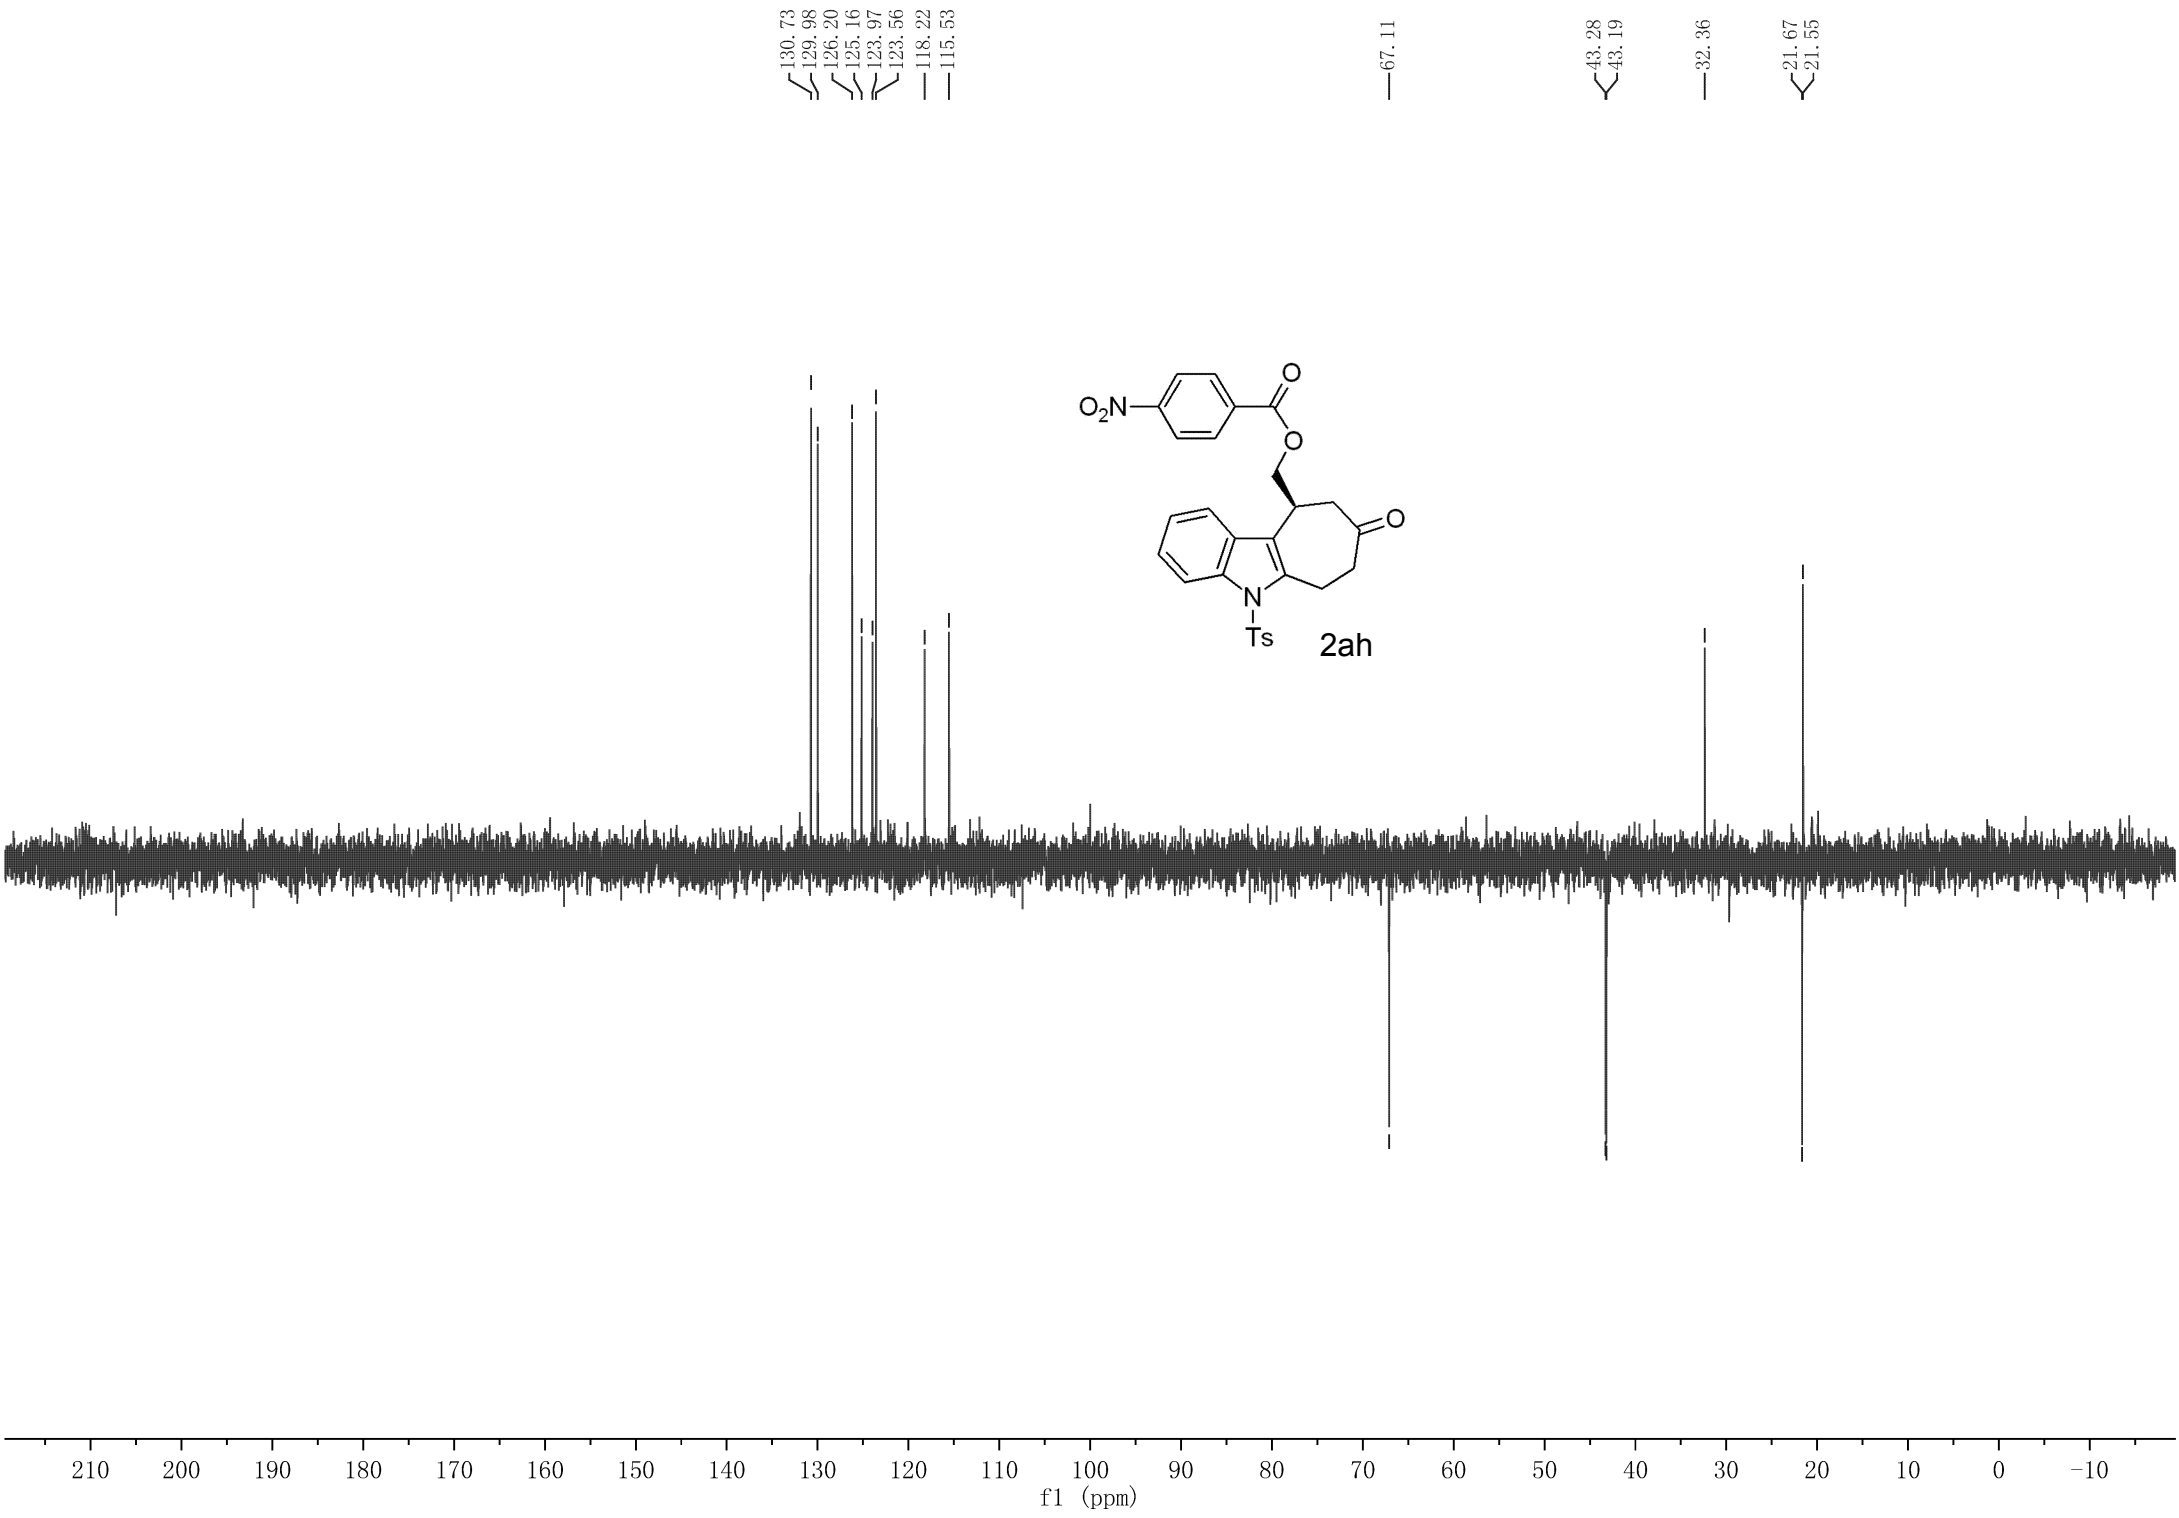

8.233  
8.231  
8.215  
8.212  
7.586  
7.582  
7.569  
7.565  
7.340  
7.338  
7.322  
7.319  
7.302  
7.288  
7.284  
7.268  
7.260  
7.255  
7.240  
7.237  
7.222  
7.185  
7.165

4.113  
4.105  
4.100  
4.092  
3.645  
3.632  
3.612  
3.543  
3.524  
3.383  
3.000  
2.979  
2.974  
2.705  
2.683  
2.670  
2.639  
2.146  
2.139  
2.116  
2.087  
1.703  
1.694  
1.677  
1.669  
1.660  
1.643  
1.634  
1.625  
1.621  
1.601  
1.594  
1.590  
1.585

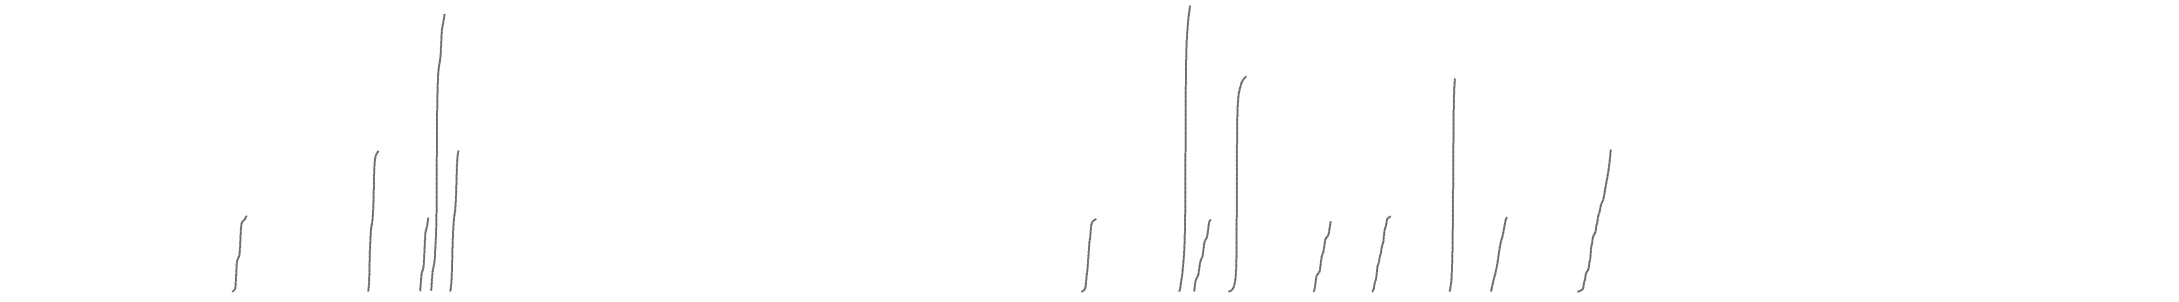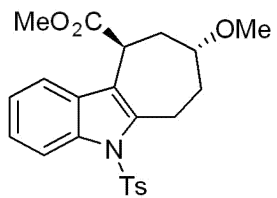

2ai

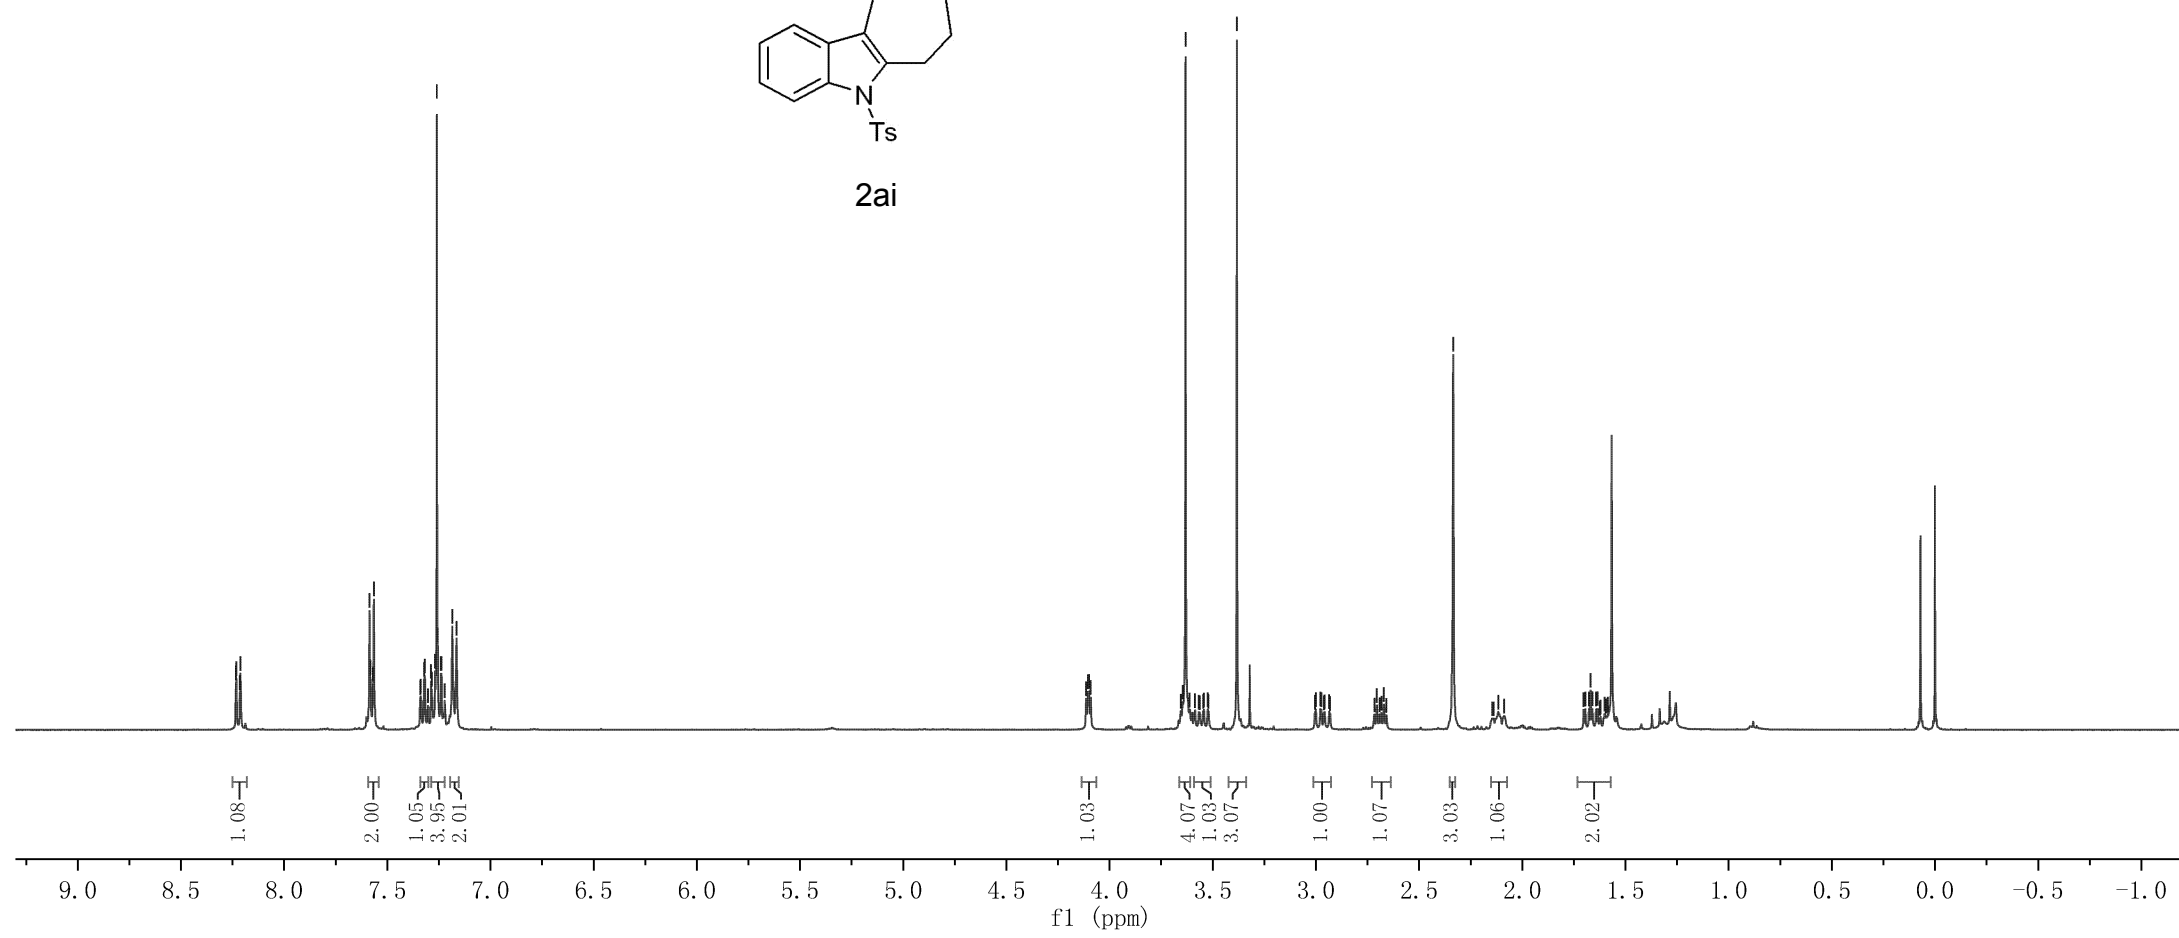

— 172.80

— 144.68

— 139.72

— 136.18

130.21

129.77

126.25

124.28

123.55

119.42

117.67

115.33

78.79

77.25

77.00

76.75

— 56.23

— 52.14

37.71

34.37

31.15

21.55

21.28

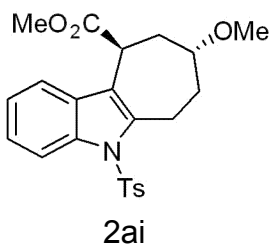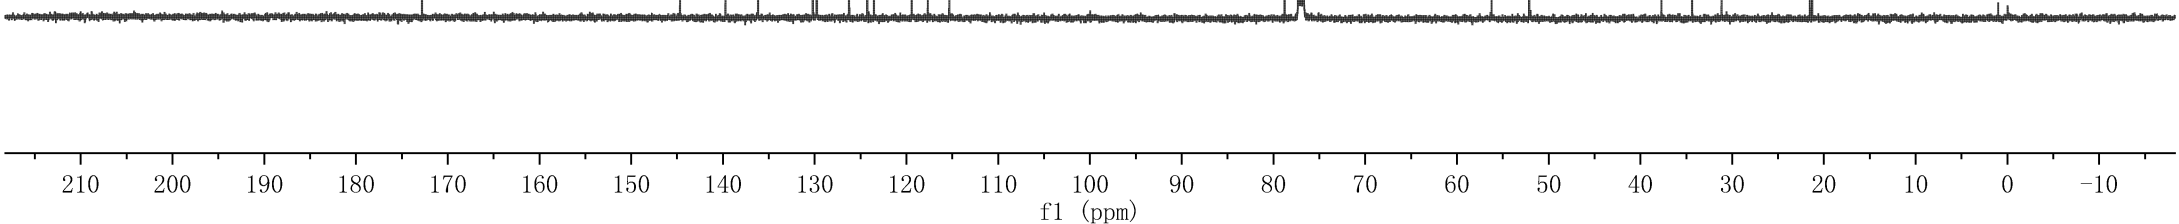

— 129.79  
— 126.27  
— 124.30  
— 123.57

— 117.69  
— 115.35

— 78.81

— 56.25  
— 52.16

— 37.73  
— 34.39  
— 31.17

— 21.56  
— 21.31

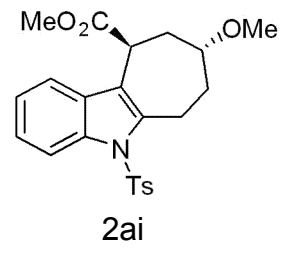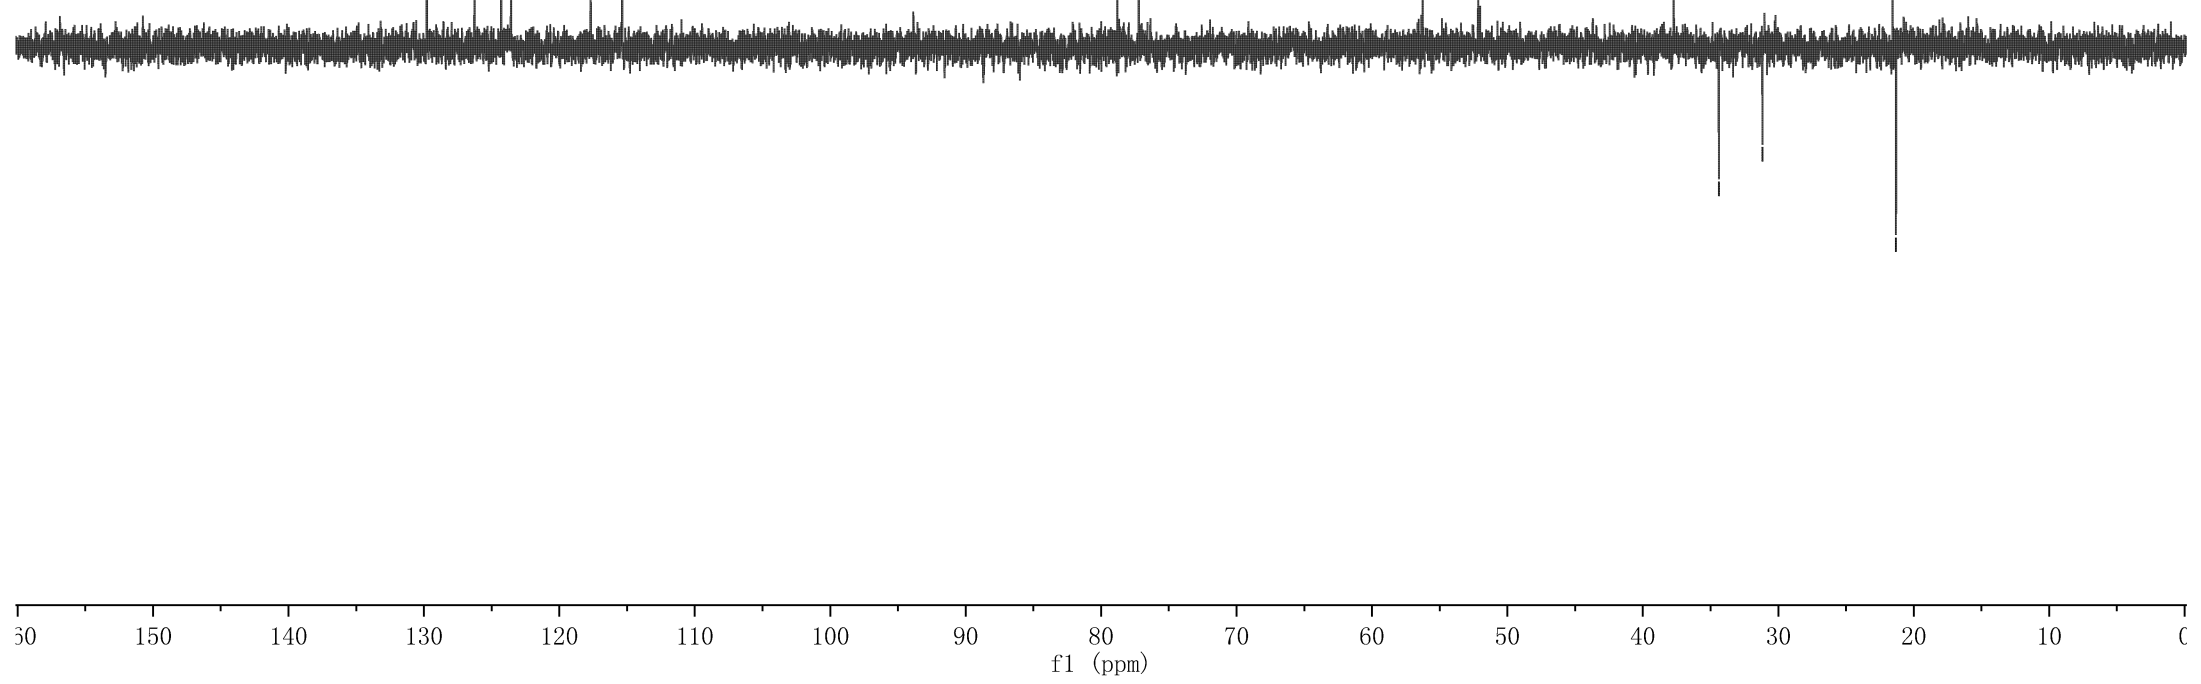

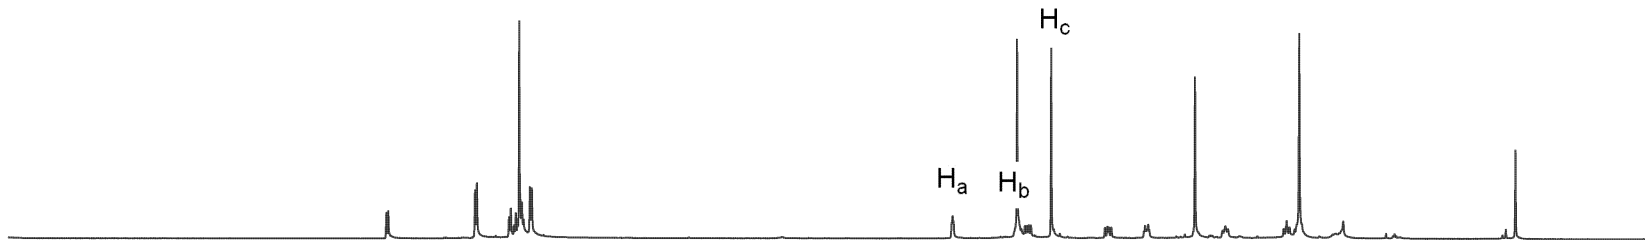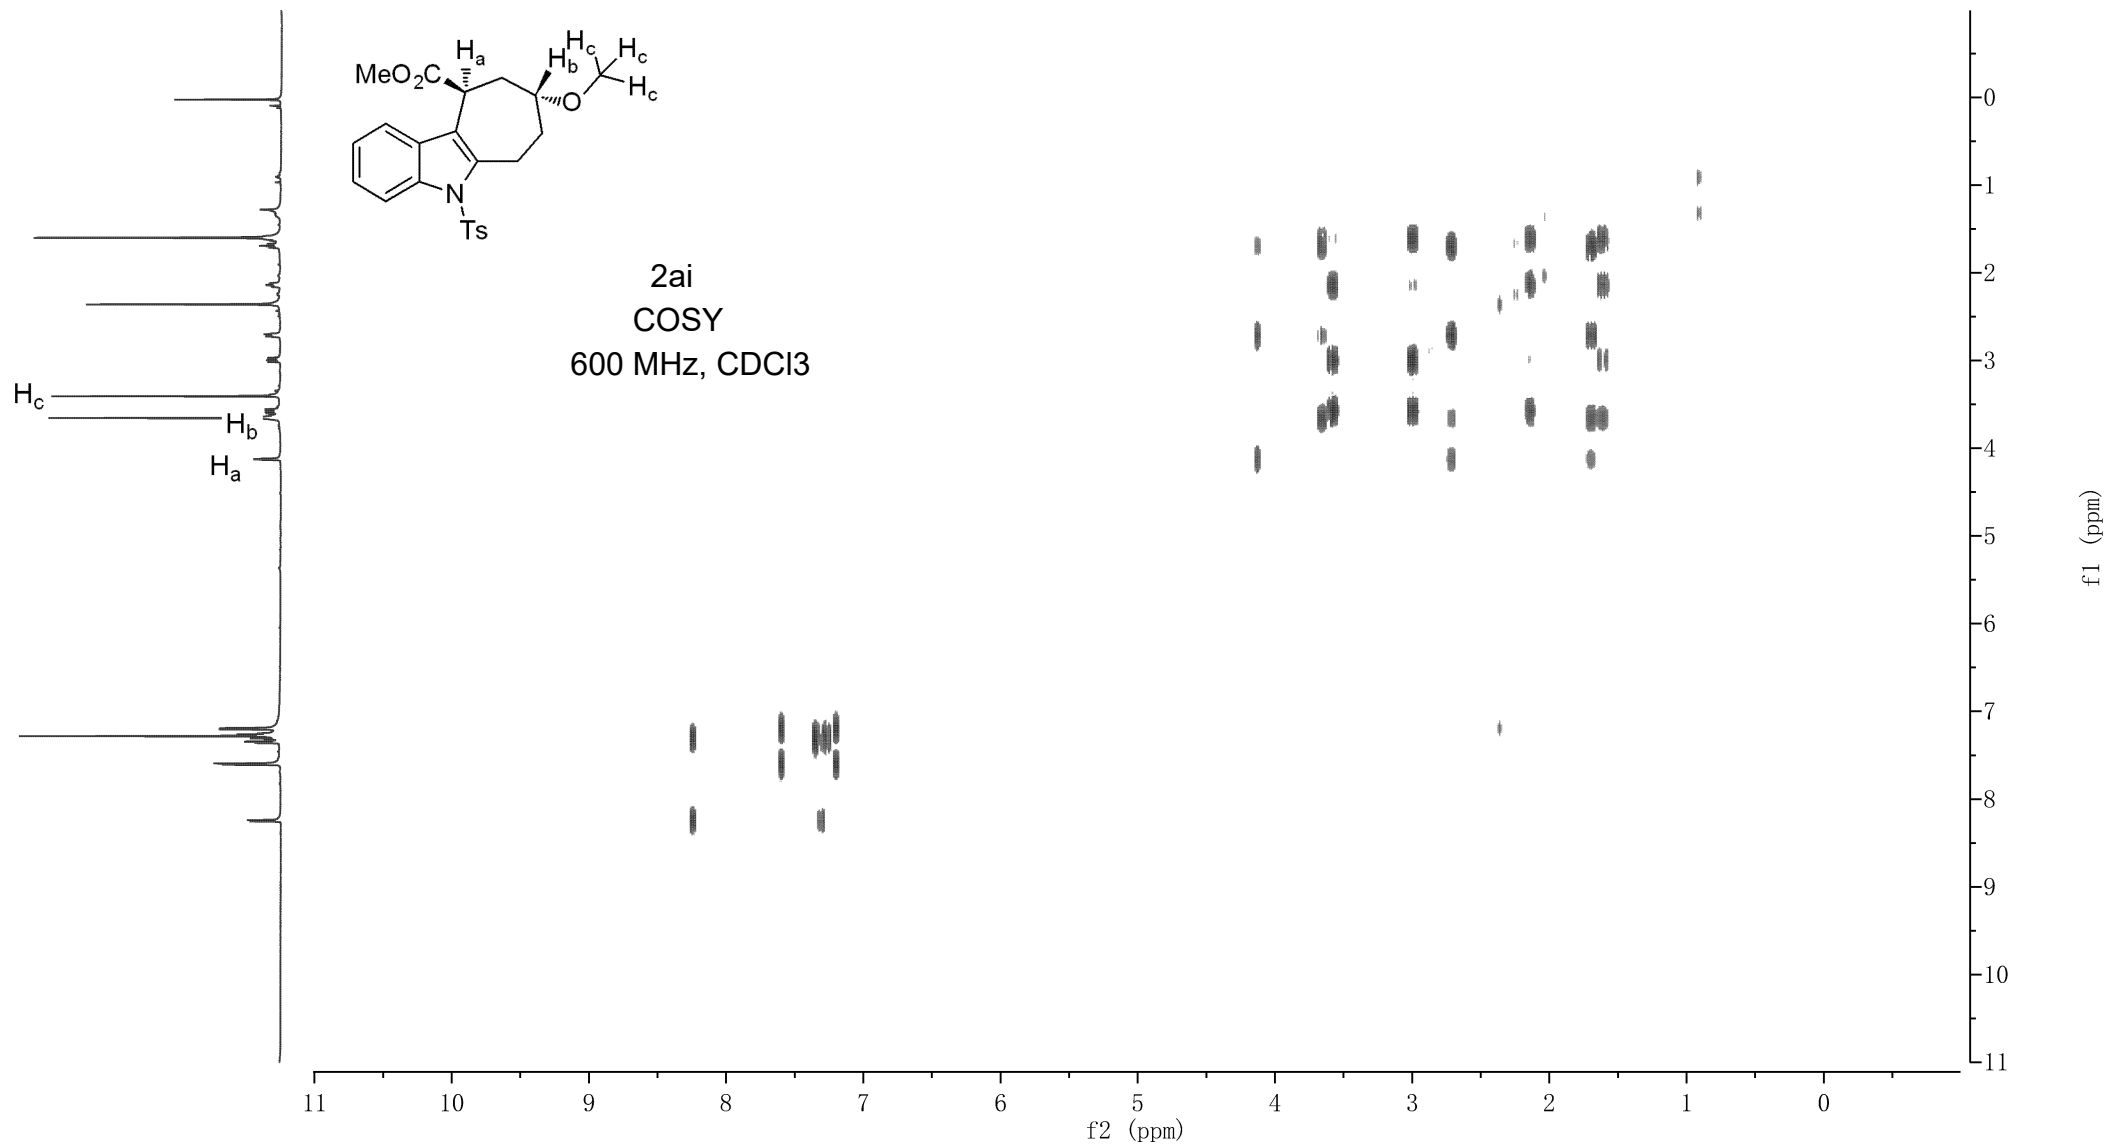

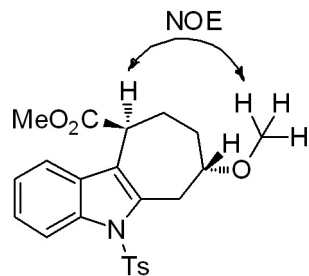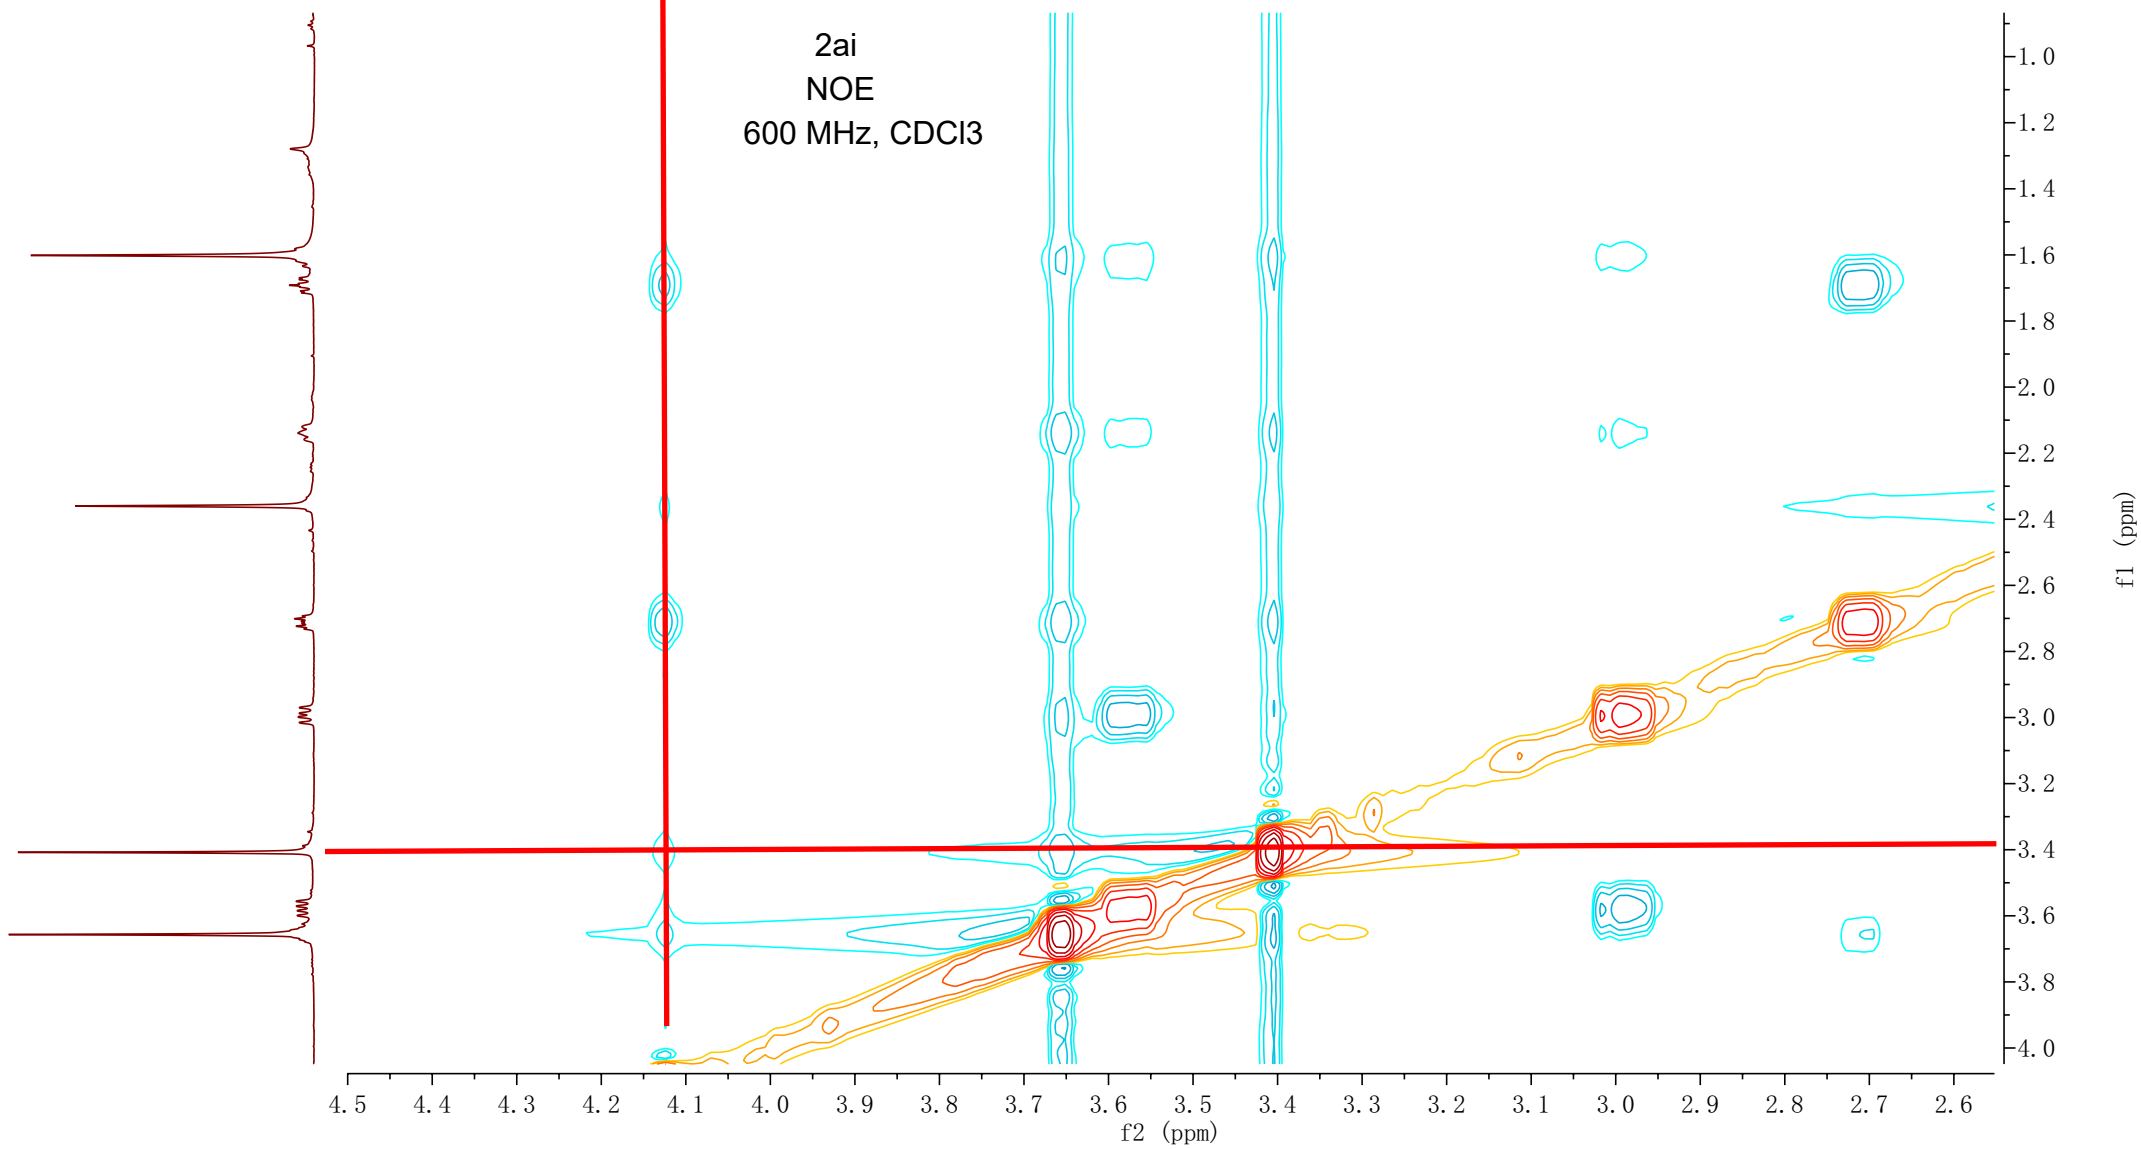





8.250  
8.231  
7.563  
7.542  
7.467  
7.450  
7.447  
7.346  
7.342  
7.327  
7.324  
7.308  
7.302  
7.298  
7.283  
7.280  
7.260  
7.191  
7.171

5.122  
5.109  
5.094

3.988  
3.977  
3.966  
3.945  
3.934  
3.923  
3.862  
3.842

2.892  
2.872  
2.861  
2.829  
2.737  
2.717  
2.706  
2.687  
2.424  
2.398  
2.387  
2.334  
1.862  
1.846  
1.827  
1.821  
1.816  
1.810  
1.790  
1.779

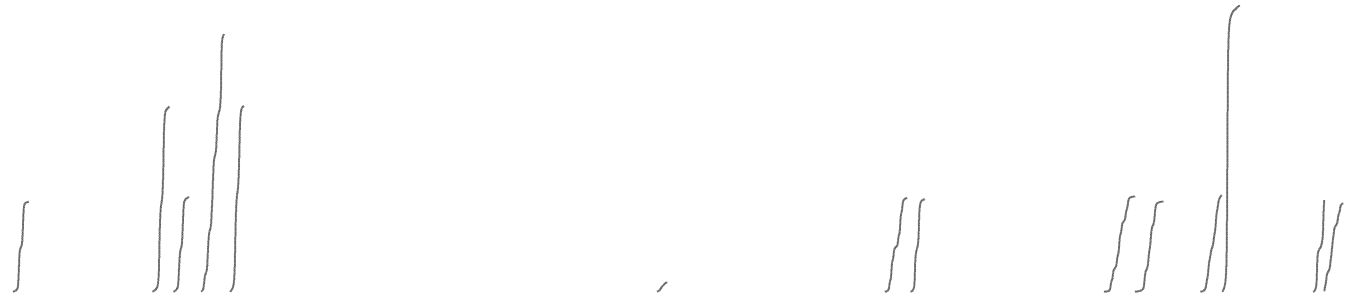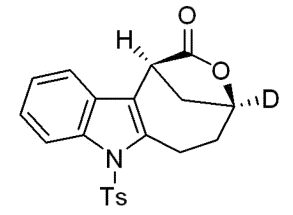

2a''

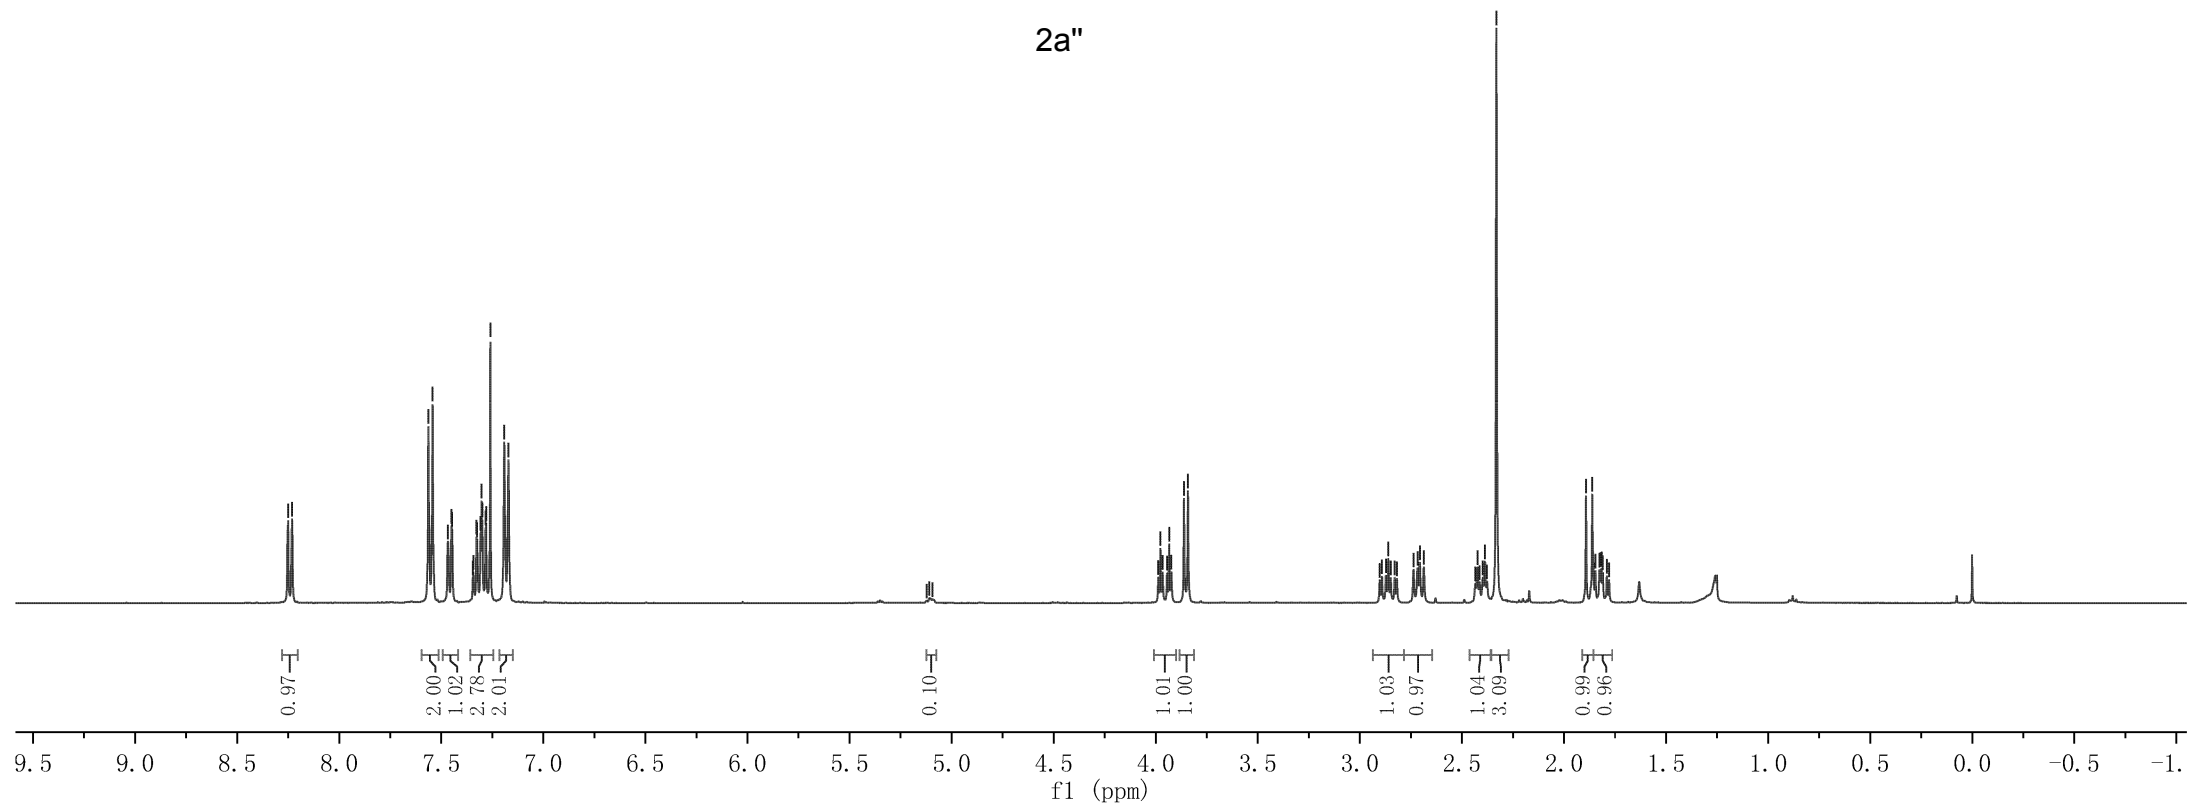

8.225  
8.223  
8.205  
8.202  
7.612  
7.590  
7.356  
7.352  
7.299  
7.296  
7.280  
7.277  
7.260  
7.213  
7.212  
7.192  
5.956  
5.953  
5.930  
5.911  
5.905  
5.894  
5.888  
5.886  
5.869  
5.218  
5.215  
5.172  
5.168  
4.848  
4.845  
4.546  
4.514  
4.316  
4.300  
4.292  
4.275  
4.275  
3.691  
3.686  
3.644  
3.639  
3.409  
3.402  
3.378  
3.369  
2.808  
2.795  
2.792  
2.789  
2.747  
2.747

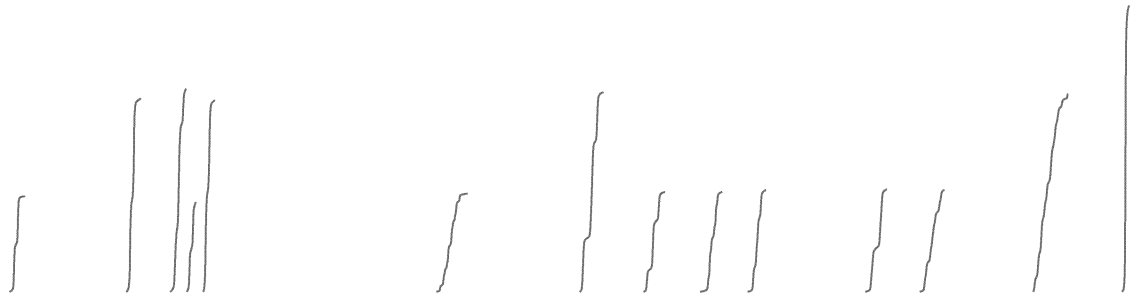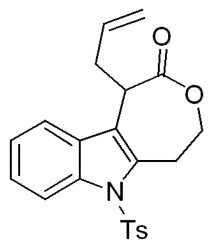

4ga

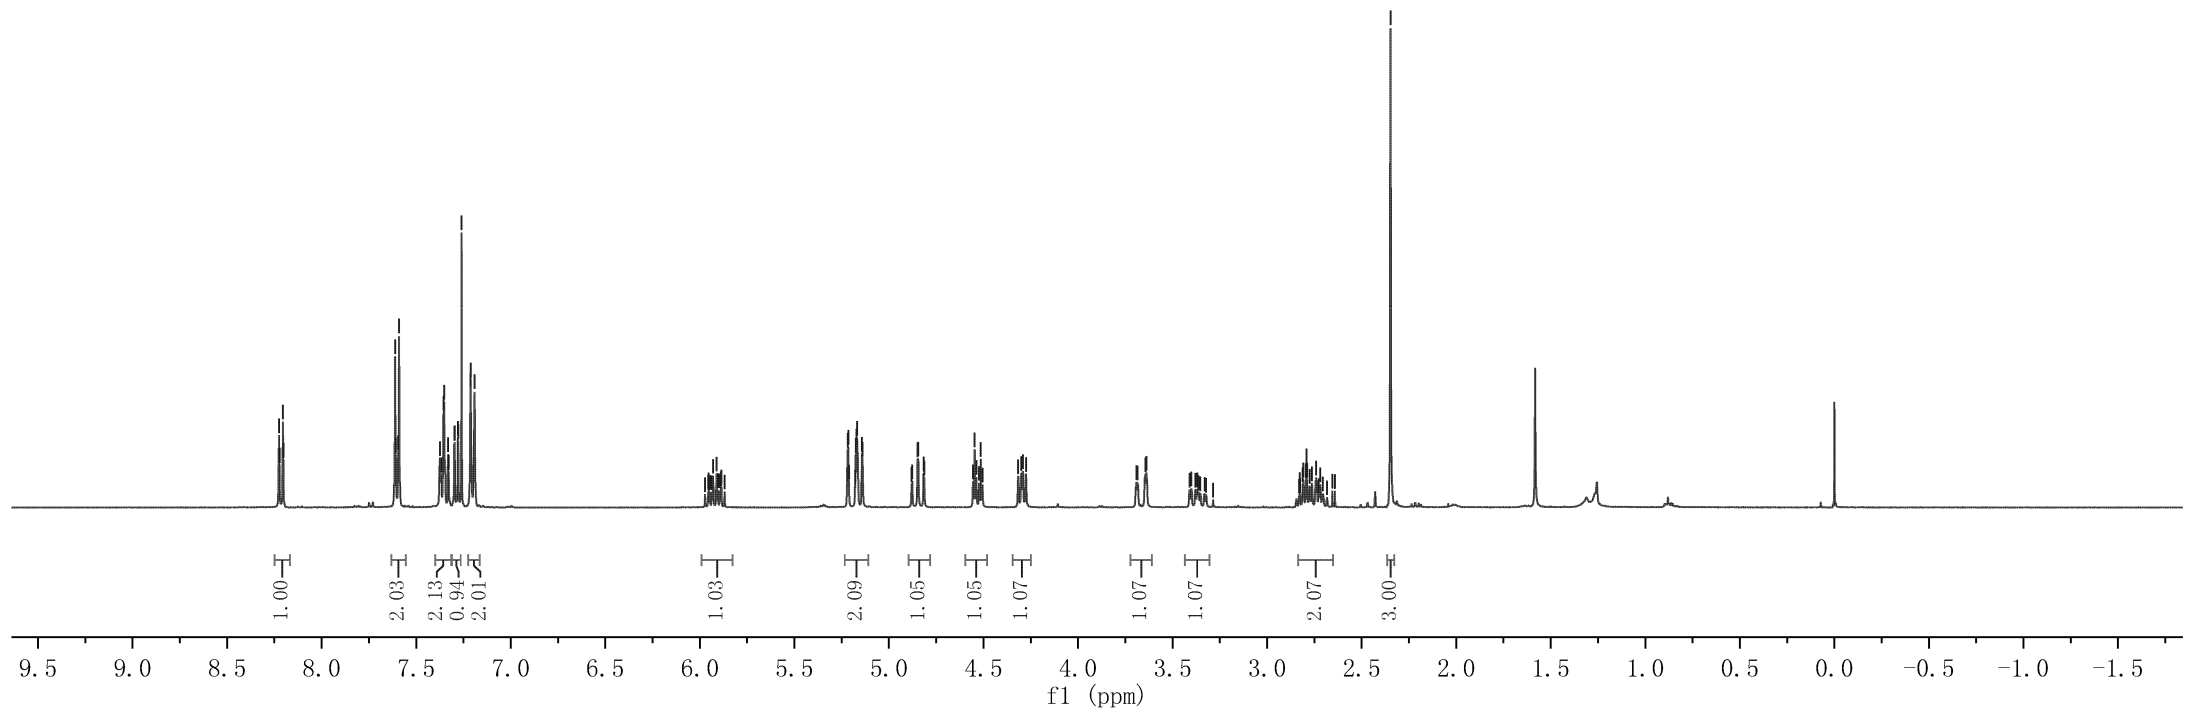

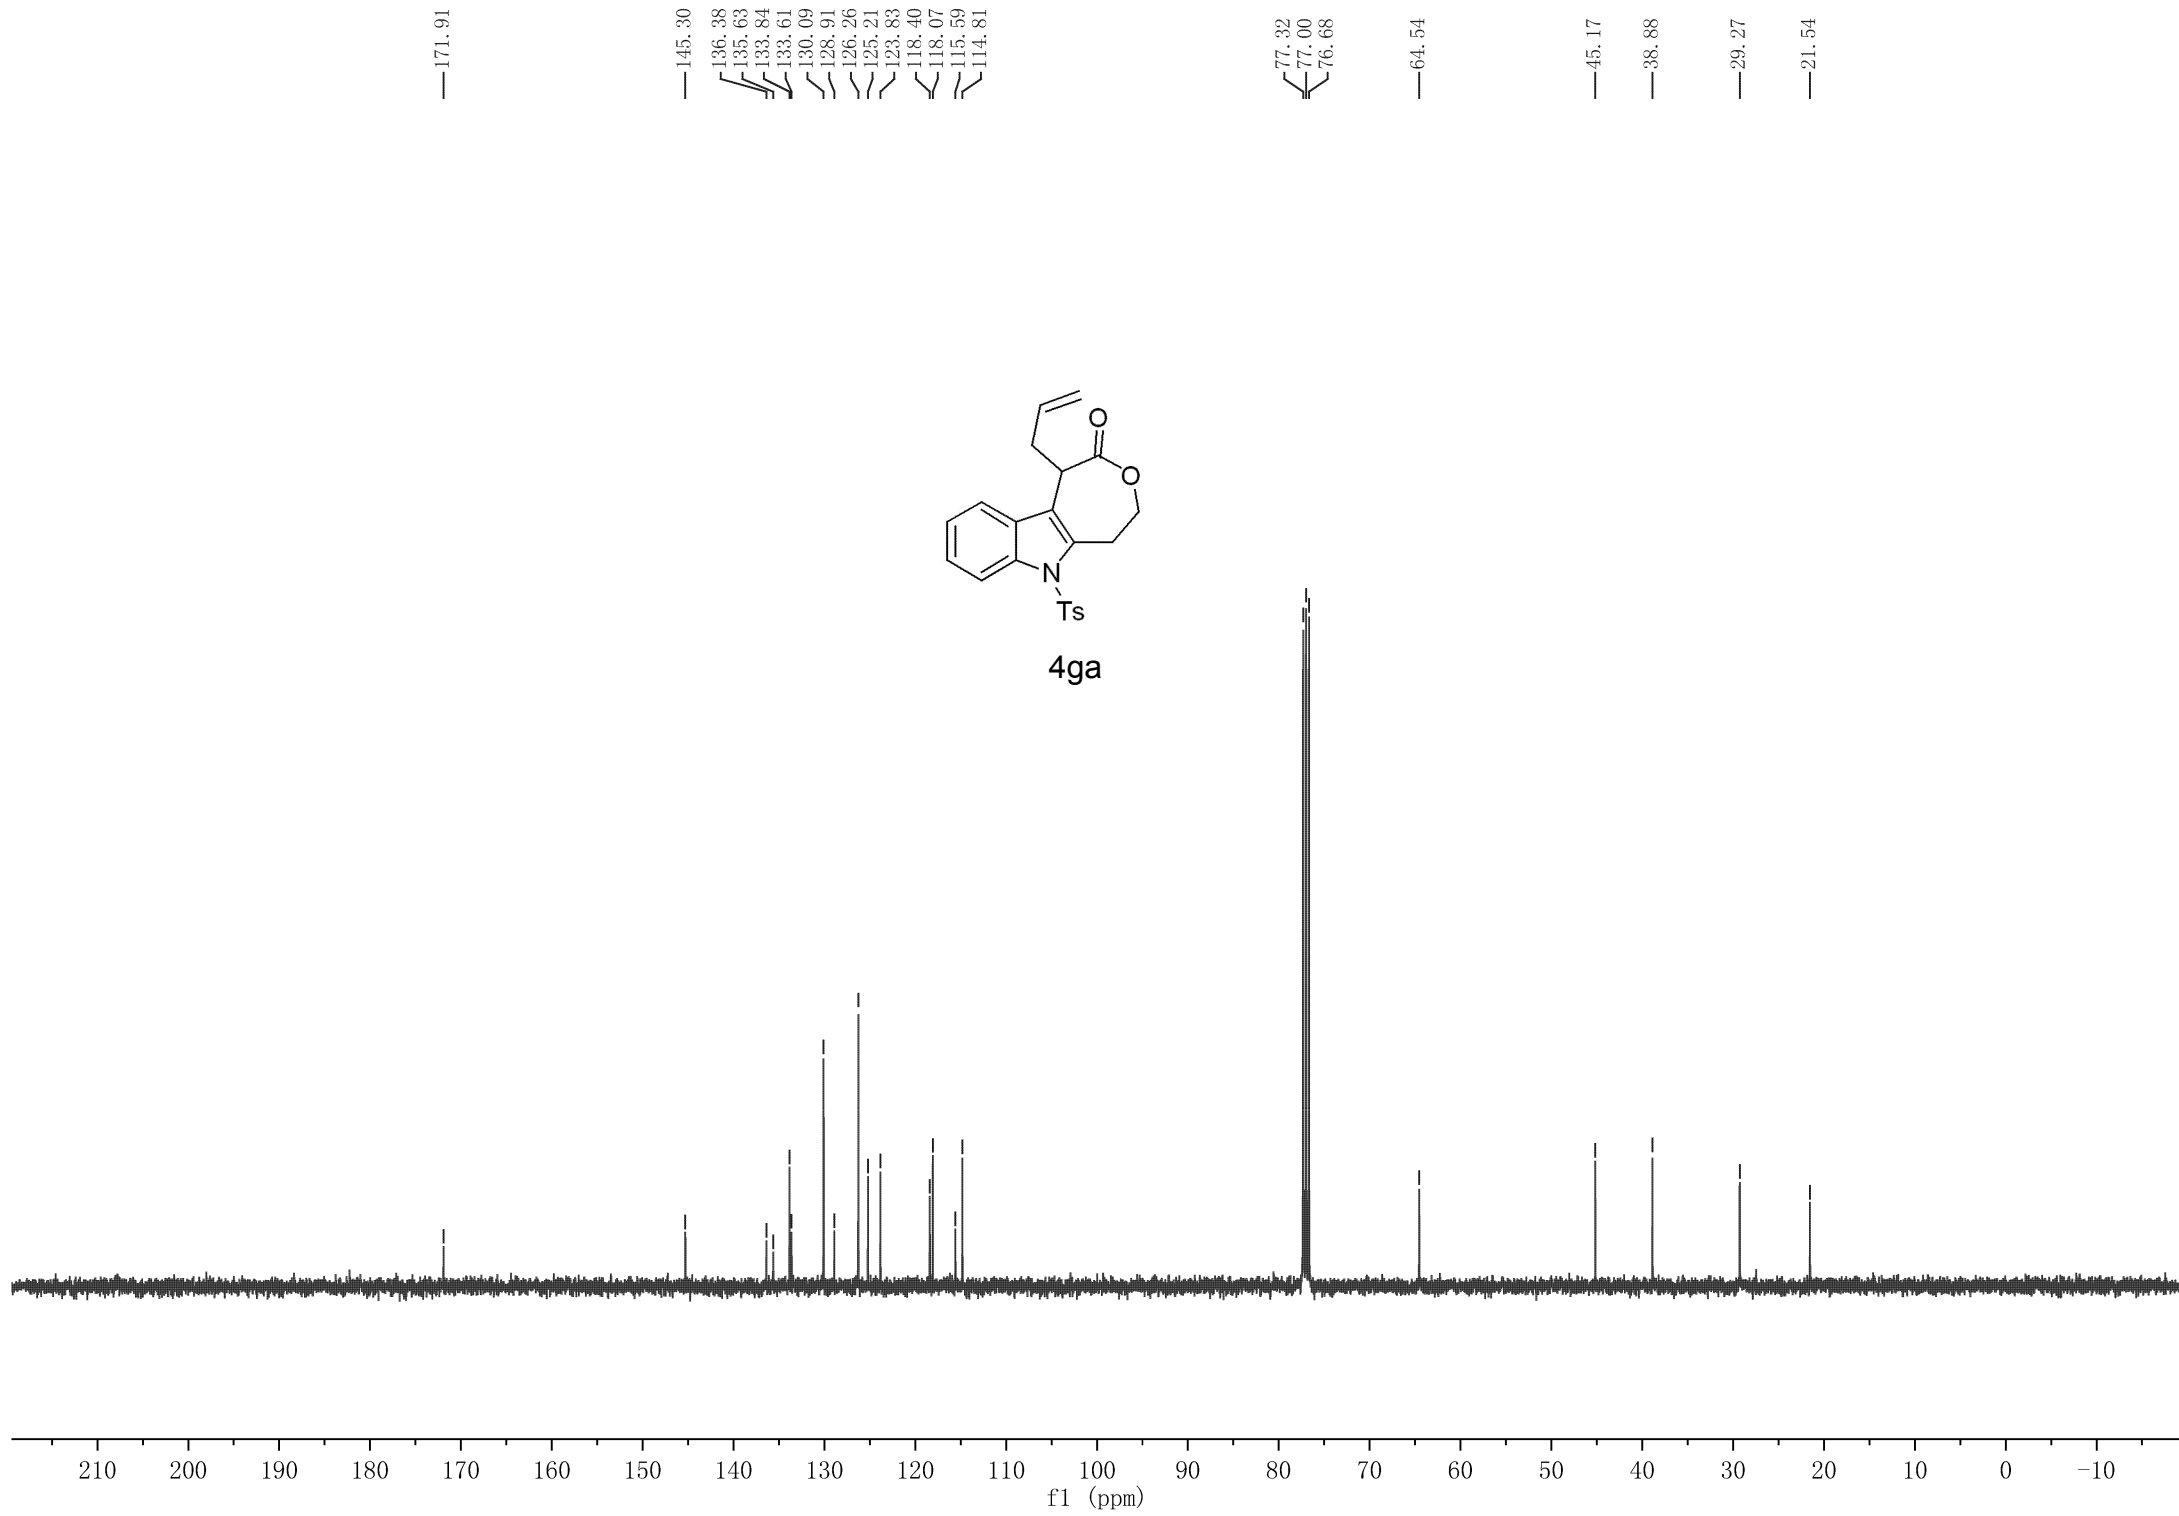

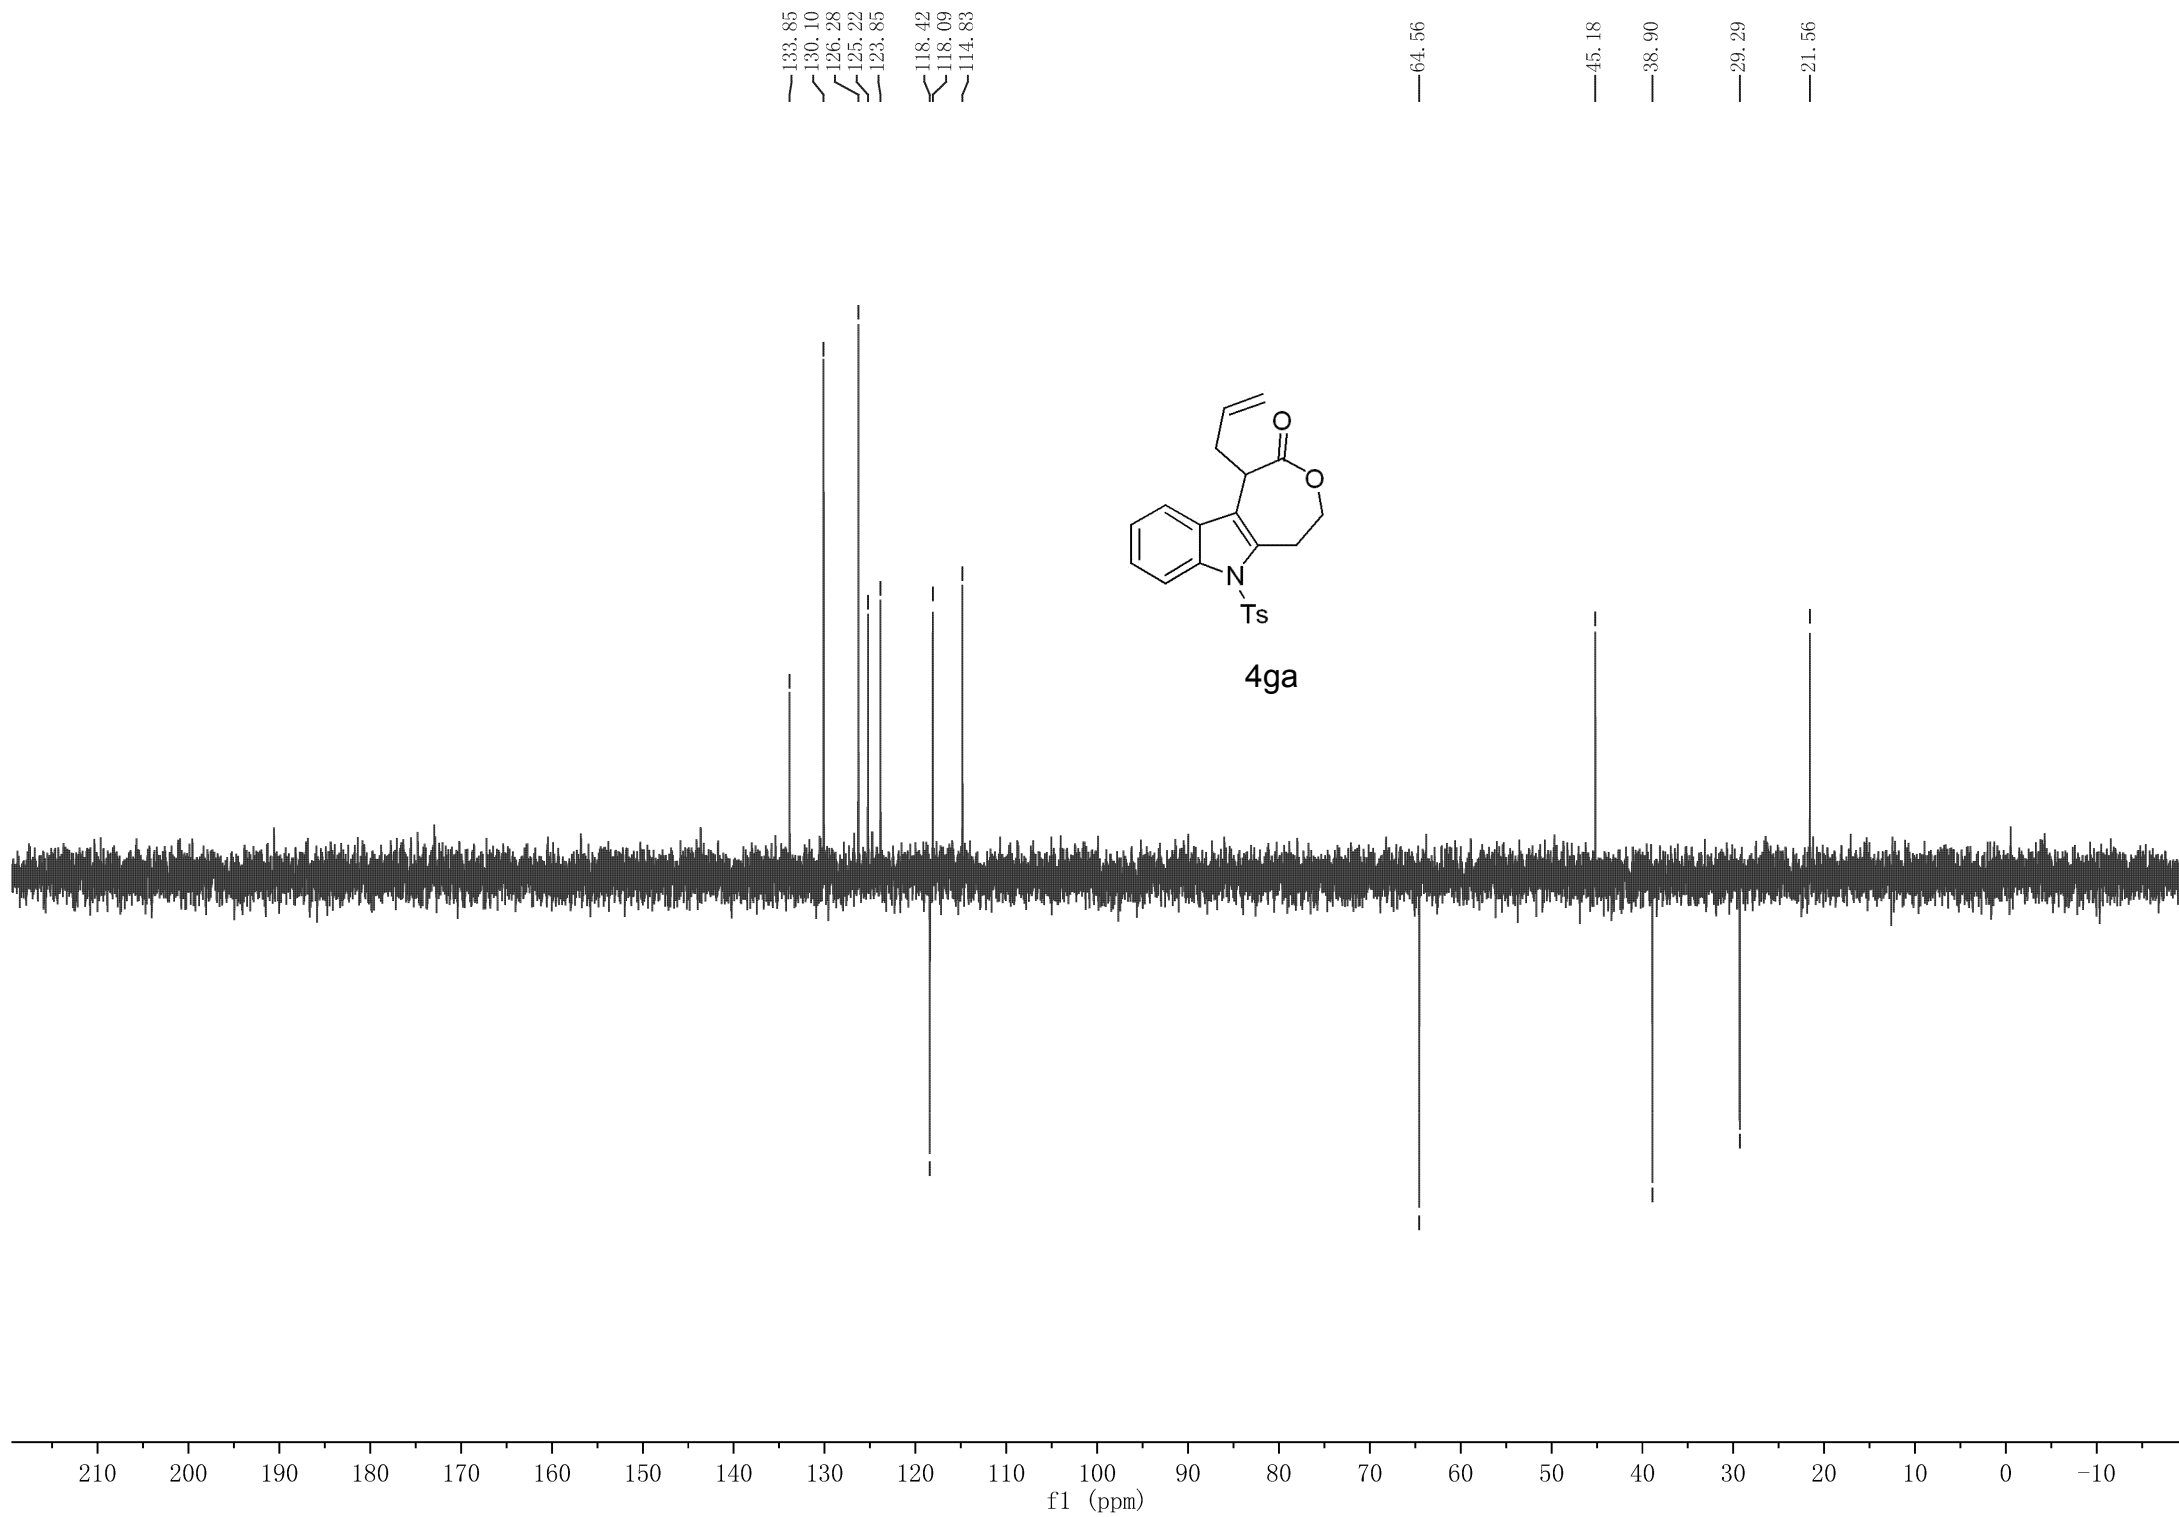

7.372  
7.355  
7.337  
7.321  
7.303  
7.284  
7.262  
7.240  
7.230  
7.211

5.923  
5.906  
5.898  
5.881  
5.864  
5.847  
5.838  
5.821  
5.431  
5.396  
5.300  
5.265  
5.151  
5.131  
5.106

3.713  
3.696  
3.680

2.863  
2.848  
2.829  
2.812  
2.796  
2.738  
2.720  
2.702  
2.684  
2.666

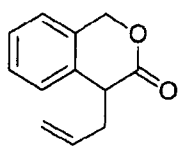

4ha

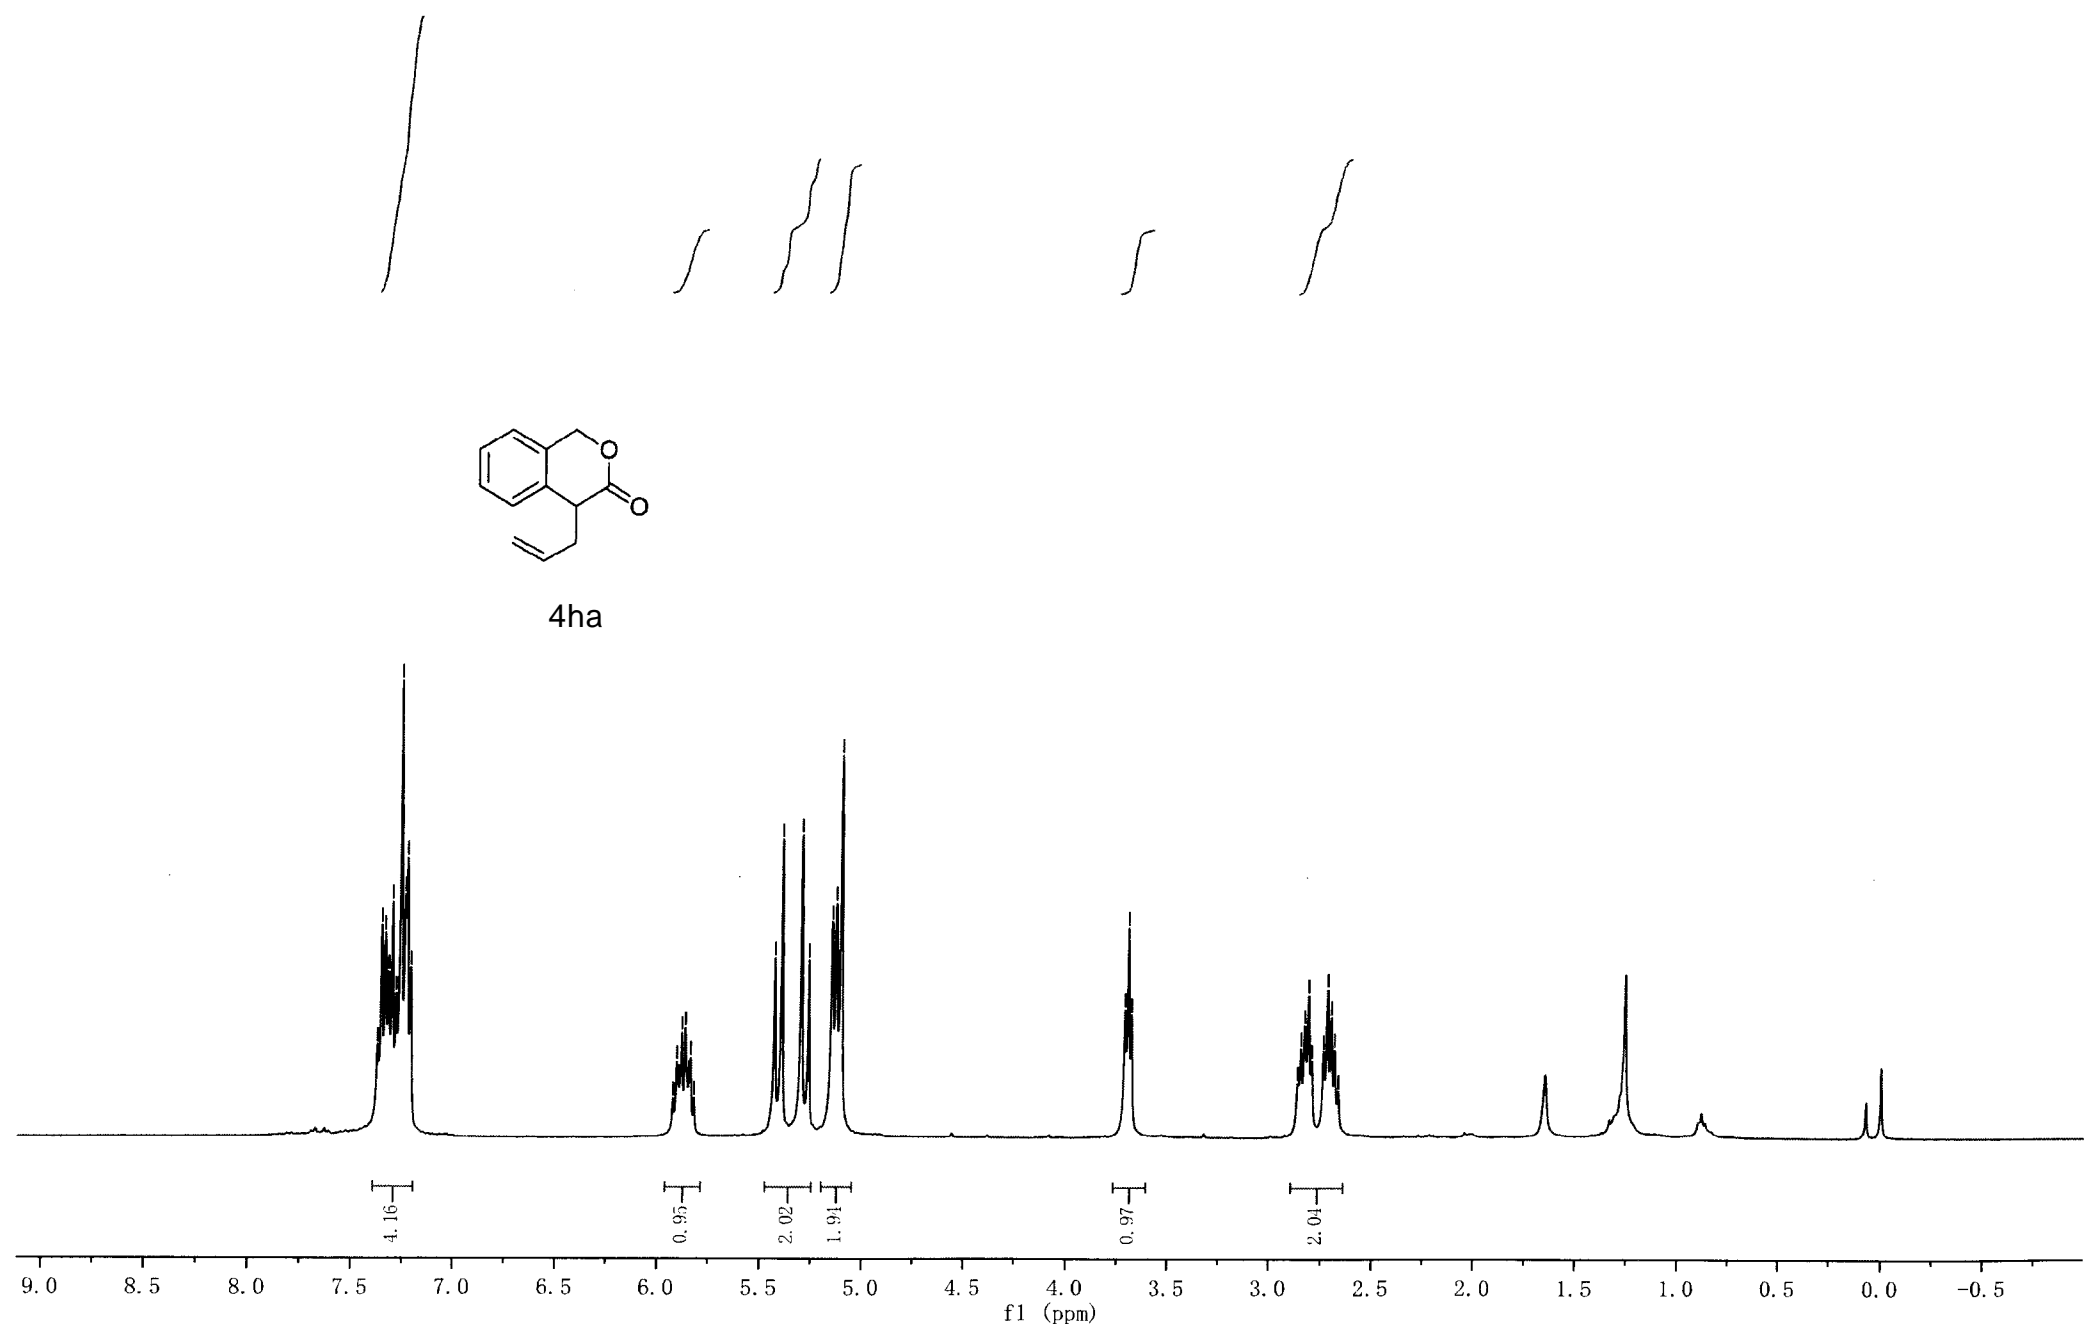

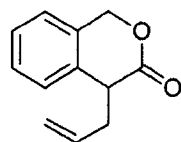

4ha

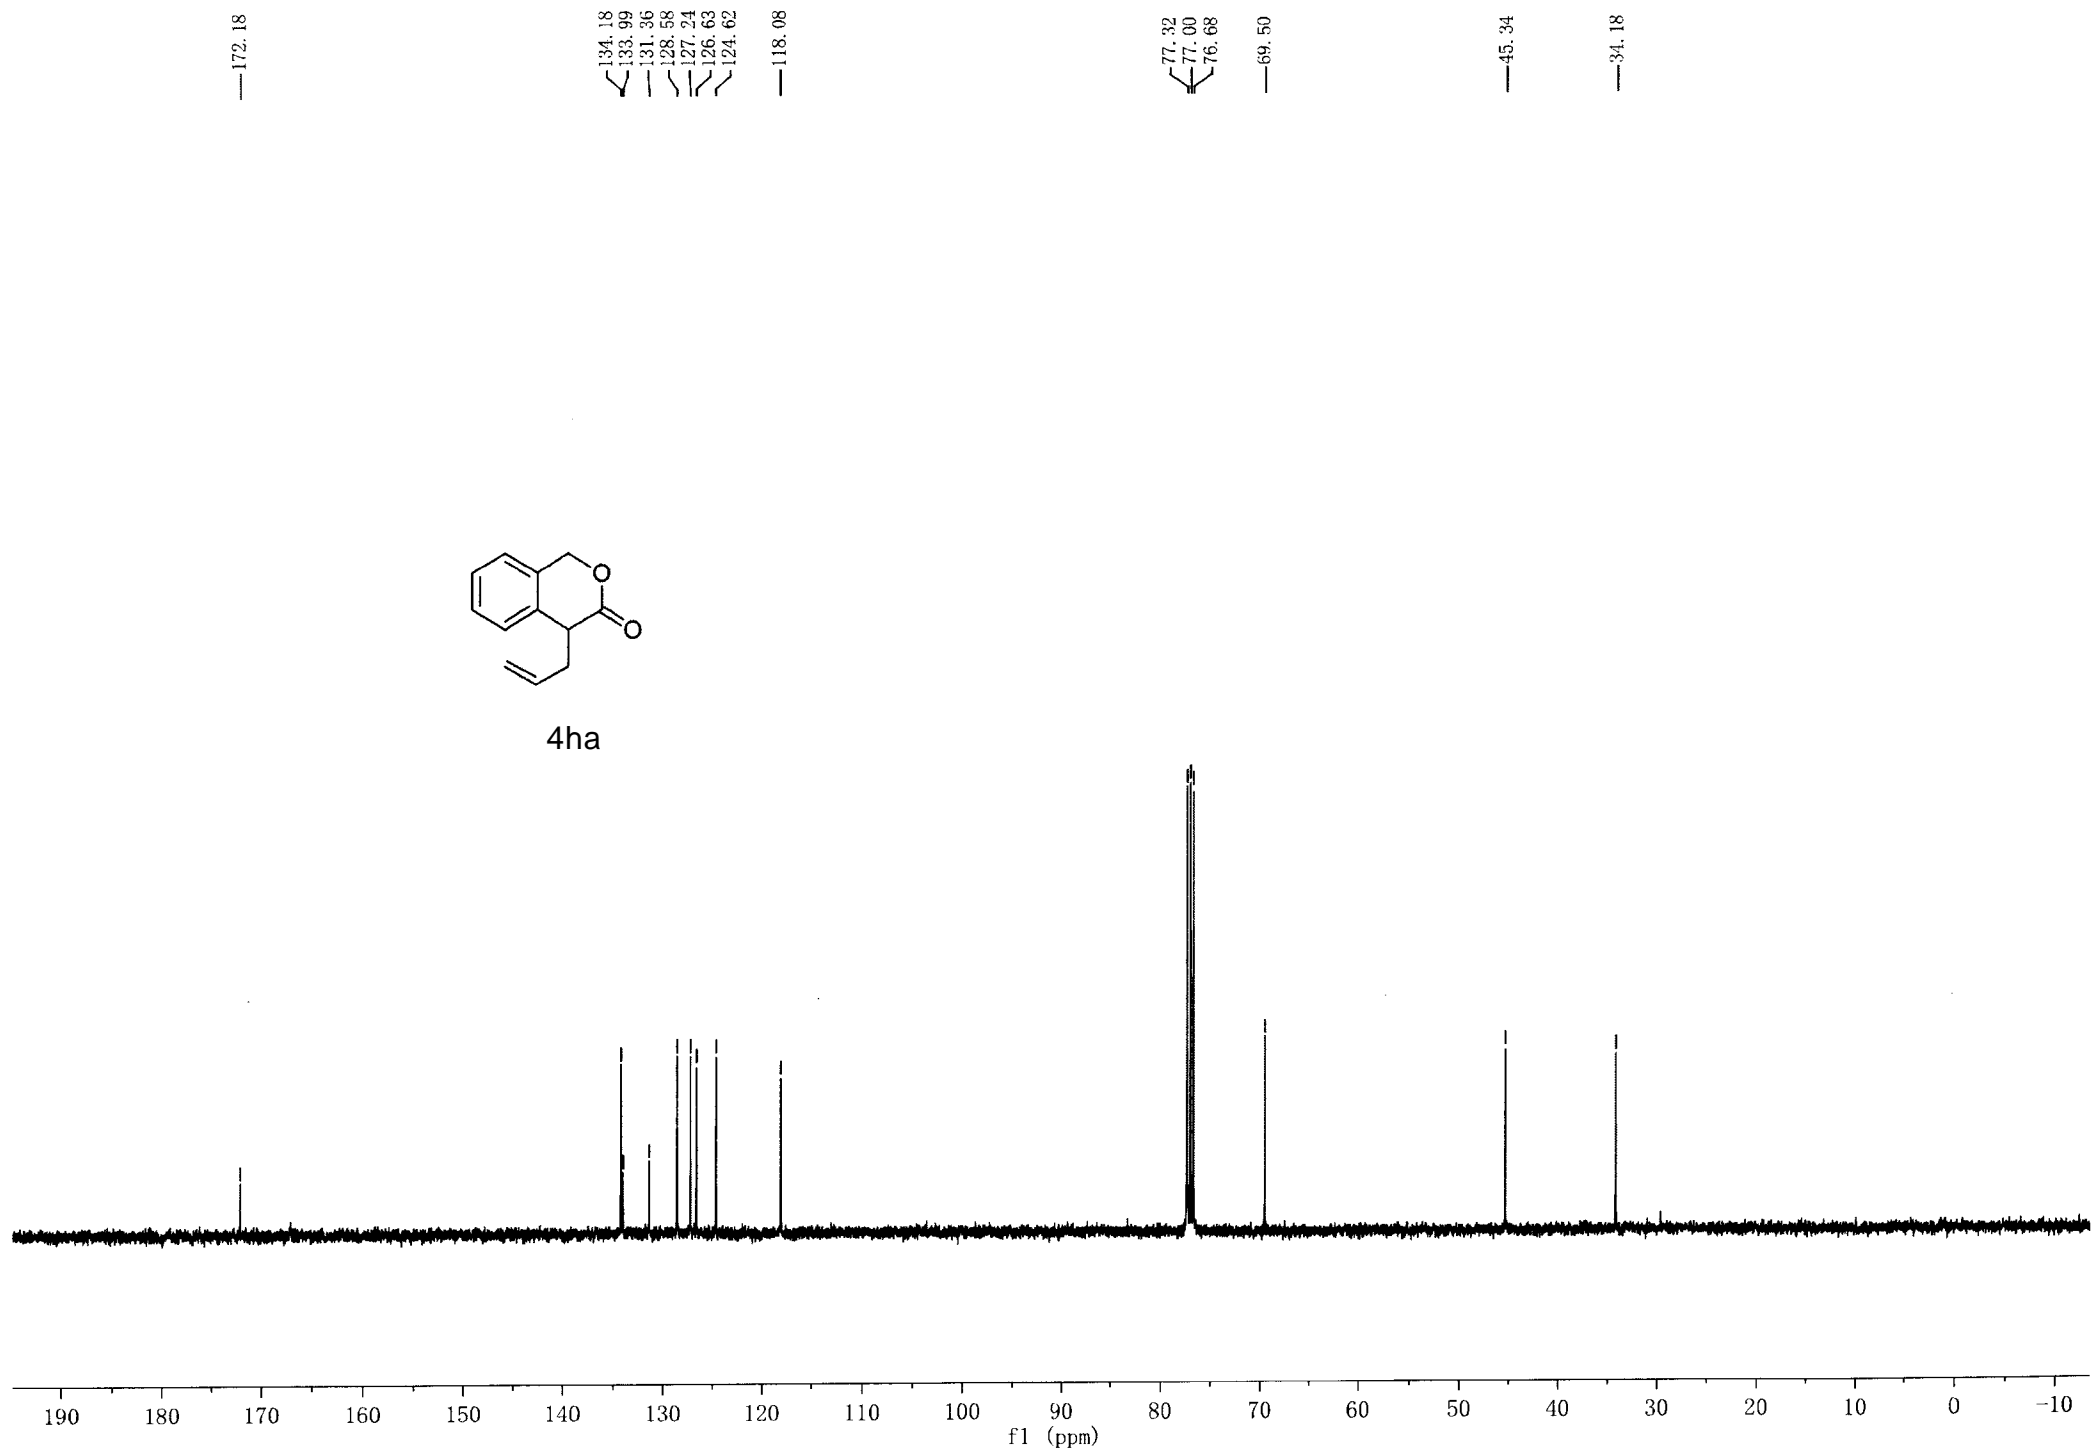

Supplement: SC-010-C9SC00079H-s001.pdf [file SC-010-C9SC00079H-s001.pdf]
